# Supplementary material for: Cardiac neural crest lineage diversity and underlying gene regulatory networks revealed by multimodal analysis
Source: Research Square preprint supplement (doi:10.21203/rs.3.rs-1756528/v1), 2022-06-24
Supplement: Supplementary file 1 [file SupplementaryData1.xlsx]

## Sheet: FluidigmC1_metadata
	orig.ident	nCount_RNA	nFeature_RNA	stage	cell	percent.mt	S.Score	G2M.Score	Phase	old.ident	nCount_SCT	nFeature_SCT	SCT_snn_res.1	seurat_clusters	sub.cluster
C101	4	1151575	8736	E17.5	C101	0.034267	-69.9331	-107.177	G1	Seuratcds	1203654	8731	4	4	4_1
C103	7	2609182	8299	E17.5	C103	0.0174875	-93.346	1303	G2M	Seuratcds	1207658	7183	7	7	7
C108	10	2694096	7983	E17.5	C108	0.0237	-171.179	-284.166	G1	Seuratcds	1213760	6719	10	10	10
C110	11	1558790	7730	E17.5	C110	0.0316085	-61.504	-174.169	G1	Seuratcds	1204207	7710	11	11	11
C112	9	1570080	7858	E17.5	C112	0.0240223	-62.1629	-47.8651	G1	Seuratcds	1207226	7839	9	9	9
C116	11	1468434	7745	E17.5	C116	0.0341663	-78.8366	-174.72	G1	Seuratcds	1203992	7724	11	11	11
C118	2	1533087	8076	E17.5	C118	0.0267154	-57.2508	-170.42	G1	Seuratcds	1206414	8052	2	2	2_1
C119	4	172593	6546	E17.5	C119	0.0335993	-3.98882	-14.2059	G1	Seuratcds	1182785	6644	4	4	4_0
C120	7	1707957	7638	E17.5	C120	0.0357351	-44.0842	59.6388	G2M	Seuratcds	1206332	7620	7	7	7
C121	7	1895457	7223	E17.5	C121	0.0291159	-102.328	-207.48	G1	Seuratcds	1207212	7208	7	7	7
C122	4	152731	6998	E17.5	C122	0.0658151	-7.43984	-12.4105	G1	Seuratcds	1159895	7085	4	4	4_0
C124	7	1685188	7809	E17.5	C124	0.034408	-139.478	-154.455	G1	Seuratcds	1204256	7800	7	7	7
C125	7	2285243	7718	E17.5	C125	0.0254489	-78.7404	749.464	G2M	Seuratcds	1209399	7638	7	7	7
C126	9	1871028	8184	E17.5	C126	0.020981	-174.695	-171.947	G1	Seuratcds	1216029	8170	9	9	9
C128	7	2140413	7905	E17.5	C128	0.0317289	375.46	77.9591	S	Seuratcds	1207470	7874	7	7	7
C129	7	1932485	7794	E17.5	C129	0.0197031	-154.68	-245.254	G1	Seuratcds	1209499	7779	7	7	7
C130	2	2217460	8031	E17.5	C130	0.025278	-146.001	-284.801	G1	Seuratcds	1207070	7997	2	2	2_0
C131	7	2327160	7844	E17.5	C131	0.0240473	-143.052	-262.623	G1	Seuratcds	1210090	7494	7	7	7
C132	9	1928051	8163	E17.5	C132	0.0224792	-226.712	-194.094	G1	Seuratcds	1214089	8137	9	9	9
C133	9	1701745	7427	E17.5	C133	0.0181543	-124.738	-202.434	G1	Seuratcds	1207633	7412	9	9	9
C134	7	1681730	7538	E17.5	C134	0.035586	-12.6831	-174.027	G1	Seuratcds	1205739	7524	7	7	7
C135	9	1732575	7354	E17.5	C135	0.0243528	-170.683	-212.632	G1	Seuratcds	1209364	7332	9	9	9
C136	4	1033946	7975	E17.5	C136	0.0375813	-76.2819	-94.2532	G1	Seuratcds	1202248	7969	4	4	4_0
C139	10	1582205	6690	E17.5	C139	0.026324	-94.7948	-154.691	G1	Seuratcds	1208092	6687	10	10	10
C141	4	1239380	7241	E17.5	C141	0.0239967	-69.9409	-145.226	G1	Seuratcds	1204560	7231	4	4	4_0
C142	7	1484602	7691	E17.5	C142	0.0389734	-99.3625	-186.378	G1	Seuratcds	1206004	7682	7	7	7
C143	4	502012	8412	E17.5	C143	0.0197585	-43.6714	23.8848	G2M	Seuratcds	1180646	8406	4	4	4_1
C144	2	793334	7651	E17.5	C144	0.0292966	-38.6804	-85.9335	G1	Seuratcds	1203203	7647	2	2	2_0
C146	4	276107	8805	E17.5	C146	0.0260008	-7.91133	-10.3119	G1	Seuratcds	1191690	8802	4	4	4_0
C147	4	170463	8158	E17.5	C147	0.024586	-4.29971	-7.58132	G1	Seuratcds	1190704	8177	4	4	4_0
C148	4	258011	8496	E17.5	C148	0.0380255	-7.61299	-14.3362	G1	Seuratcds	1193420	8492	4	4	4_0
C150	4	1420080	8238	E17.5	C150	0.0242585	-81.9636	-143.446	G1	Seuratcds	1205107	8226	4	4	4_1
C154	10	2044269	7528	E17.5	C154	0.0224706	-58.2701	-179.24	G1	Seuratcds	1207844	7511	10	10	10
C155	4	1785104	8064	E17.5	C155	0.0306145	-139.796	-36.0435	G1	Seuratcds	1204563	8046	4	4	4_1
C156	2	1699801	7732	E17.5	C156	0.0251759	-94.3699	-201.625	G1	Seuratcds	1207051	7719	2	2	2_0
C157	4	1444664	7392	E17.5	C157	0.0343028	-90.586	-167.346	G1	Seuratcds	1205533	7380	4	4	4_0
C158	4	1855782	7498	E17.5	C158	0.026619	-116.499	476.742	G2M	Seuratcds	1206555	7490	4	4	4_1
C161	4	1274391	7261	E17.5	C161	0.0262957	-81.2075	-163.055	G1	Seuratcds	1204696	7246	4	4	4_1
C163	7	1724985	7333	E17.5	C163	0.0312669	-20.7289	-174.095	G1	Seuratcds	1205900	7327	7	7	7
C164	2	2066311	7493	E17.5	C164	0.0284367	421.981	11.8478	S	Seuratcds	1207495	7479	2	2	2_0
C165	4	1593926	8254	E17.5	C165	0.03409	-113.314	-176.424	G1	Seuratcds	1206135	8243	4	4	4_1
C166	7	1823957	7258	E17.5	C166	0.0251256	116.452	-157.336	S	Seuratcds	1206754	7245	7	7	7
C167	4	1328868	7529	E17.5	C167	0.0279494	-101.959	-182.201	G1	Seuratcds	1205220	7522	4	4	4_1
C168	4	71923	6503	E17.5	C168	0.0326599	7.32164	-0.0537159	S	Seuratcds	1171759	10146	4	4	4_0
C170	4	1764445	8394	E17.5	C170	0.0232396	-98.6526	492.073	G2M	Seuratcds	1206931	8362	4	4	4_0
C172	4	1496313	7623	E17.5	C172	0.0411251	40.5151	-142.358	S	Seuratcds	1207323	7615	4	4	4_0
C174	4	1911804	8237	E17.5	C174	0.0204477	64.904	638.678	G2M	Seuratcds	1208658	8222	4	4	4_0
C177	2	890420	7786	E17.5	C177	0.0292143	47.7439	-53.844	S	Seuratcds	1196594	7771	2	2	2_0
C184	7	2130053	7652	E17.5	C184	0.029726	-129.853	-240.437	G1	Seuratcds	1208493	7624	7	7	7
C185	7	1852662	7119	E17.5	C185	0.0283214	-74.5953	-180.365	G1	Seuratcds	1206592	7114	7	7	7
C186	4	1346042	7718	E17.5	C186	0.0310183	-92.356	-100.627	G1	Seuratcds	1204849	7708	4	4	4_0
C187	10	402084	7110	E17.5	C187	0.0378876	25.1504	5.56478	S	Seuratcds	1192172	7081	10	10	10
C189	4	289487	7229	E17.5	C189	0.0433422	-15.1275	-31.4956	G1	Seuratcds	1192282	7224	4	4	4_0
C190	11	1682907	7724	E17.5	C190	0.0254892	-45.1683	-150.795	G1	Seuratcds	1206003	7711	11	11	11
C193	2	2025955	7513	E17.5	C193	0.0307514	-108.818	-229.337	G1	Seuratcds	1207570	7507	2	2	2_0
C194	4	1343097	6674	E17.5	C194	0.0237377	-74.4045	-167.752	G1	Seuratcds	1205420	6665	4	4	4_0
C195	7	814559	5962	E17.5	C195	0.0273915	-43.3341	-98.7461	G1	Seuratcds	1200832	5955	7	7	7
C196	4	232177	8011	E17.5	C196	0.037859	-9.75439	-18.5238	G1	Seuratcds	1187040	8010	4	4	4_1
C201	10	1717288	5128	E17.5	C201	0.0261977	-108.02	-196.018	G1	Seuratcds	1207568	5107	10	10	10
C204	7	1832462	4576	E17.5	C204	0.0327838	-63.3156	-205.633	G1	Seuratcds	1206096	4567	7	7	7
C205	7	1352700	5977	E17.5	C205	0.0353781	-74.587	-108.903	G1	Seuratcds	1204694	5954	7	7	7
C206	11	3033857	5705	E17.5	C206	0.034438	424.65	844.893	G2M	Seuratcds	1210269	5286	11	11	11
C208	2	208832	3188	E17.5	C208	0.0327823	-20.482	-20.2363	G1	Seuratcds	1166526	3815	2	2	2_1
C210	2	177023	3311	E17.5	C210	0.0572468	-17.6711	-25.612	G1	Seuratcds	1151905	4106	2	2	2_0
C211	9	1886440	3816	E17.5	C211	0.0363134	-149.77	-170.026	G1	Seuratcds	1206489	3803	9	9	9
C212	10	2831742	4357	E17.5	C212	0.0334755	-214.842	-309.807	G1	Seuratcds	1209511	3913	10	10	10
C213	2	1990245	5036	E17.5	C213	0.0235046	-147.594	-175.499	G1	Seuratcds	1208477	5018	2	2	2_1
C215	11	1921304	5883	E17.5	C215	0.0324769	383.116	-90.2435	S	Seuratcds	1206917	5862	11	11	11
C217	4	1671962	5707	E17.5	C217	0.0259037	-65.1692	-175.045	G1	Seuratcds	1206924	5687	4	4	4_1
C218	11	339183	4165	E17.5	C218	0.0300487	-22.7465	-33.1	G1	Seuratcds	1173436	4210	11	11	11
C220	10	1994103	3999	E17.5	C220	0.0312837	-128.495	-219.821	G1	Seuratcds	1205943	3987	10	10	10
C221	4	1589703	4674	E17.5	C221	0.0292344	-104.07	-183.004	G1	Seuratcds	1207302	4667	4	4	4_1
C224	10	2468640	4691	E17.5	C224	0.0311017	-165.869	-303.353	G1	Seuratcds	1209500	4148	10	10	10
C225	11	1794609	6674	E17.5	C225	0.0366464	-40.5689	366.878	G2M	Seuratcds	1206256	6648	11	11	11
C226	9	1930699	3875	E17.5	C226	0.0318216	-169.386	-193.847	G1	Seuratcds	1210960	3847	9	9	9
C227	2	270059	3261	E17.5	C227	0.0288641	-1.1653	-27.7405	G1	Seuratcds	1168314	3579	2	2	2_1
C231	4	377103	4832	E17.5	C231	0.0310154	32.7168	9.84741	S	Seuratcds	1190766	4847	4	4	4_1
C232	1	221030	3931	E17.5	C232	0.0415645	-10.7745	-24.2915	G1	Seuratcds	1163432	4302	1	1	1
C233	2	1551932	5956	E17.5	C233	0.0324763	-105.363	-178.4	G1	Seuratcds	1206039	5946	2	2	2_0
C234	11	602983	3842	E17.5	C234	0.036807	-46.7824	-55.8837	G1	Seuratcds	1193497	3832	11	11	11
C236	2	1696763	4605	E17.5	C236	0.0313786	63.8762	475.745	G2M	Seuratcds	1207229	4598	2	2	2_0
C237	10	1958227	5980	E17.5	C237	0.0288817	336.223	-98.9148	S	Seuratcds	1207598	5961	10	10	10
C238	2	227611	4527	E17.5	C238	0.0312507	-5.5716	-7.53373	G1	Seuratcds	1163765	4779	2	2	2_1
C239	2	817933	4726	E17.5	C239	0.0315295	-92.4	-55.8375	G1	Seuratcds	1187030	4712	2	2	2_1
C240	10	2013088	4658	E17.5	C240	0.0311208	-114.43	-202.512	G1	Seuratcds	1208569	4646	10	10	10
C241	2	1579552	4504	E17.5	C241	0.0307802	-68.1036	-146.759	G1	Seuratcds	1205564	4500	2	2	2_0
C243	2	1480016	6441	E17.5	C243	0.0266477	-18.1198	-158.216	G1	Seuratcds	1204934	6424	2	2	2_1
C244	2	1249964	6783	E17.5	C244	0.0264392	130.448	112.932	S	Seuratcds	1203801	6762	2	2	2_1
C245	2	1162986	5064	E17.5	C245	0.0233864	-95.2244	-111.416	G1	Seuratcds	1202859	5049	2	2	2_1
C249	2	232223	3388	E17.5	C249	0.0361291	-19.3203	-22.0579	G1	Seuratcds	1181635	3806	2	2	2_1
C250	9	2302355	4224	E17.5	C250	0.0268955	-131.431	-281.599	G1	Seuratcds	1211079	4040	9	9	9
C251	2	189763	4399	E17.5	C251	0.0464263	5.47218	60.6261	G2M	Seuratcds	1177414	4809	2	2	2_0
C252	2	2946311	4751	E17.5	C252	0.0301764	-144.963	-350.97	G1	Seuratcds	1208768	4386	2	2	2_1
C253	2	1778832	3441	E17.5	C253	0.020487	-167.846	-221.839	G1	Seuratcds	1208562	3433	2	2	2_1
C254	11	364267	3991	E17.5	C254	0.0280893	28.906	-28.6764	S	Seuratcds	1181671	4035	11	11	11
C255	9	2217698	3725	E17.5	C255	0.0271958	-103.165	-205.404	G1	Seuratcds	1211835	3583	9	9	9
C256	2	65944	3607	E17.5	C256	0.0913351	-7.79945	-10.0128	G1	Seuratcds	1110845	10236	2	2	2_0
C260	2	331945	4343	E17.5	C260	0.0257964	18.997	54.5928	G2M	Seuratcds	1186775	4390	2	2	2_0
C262	2	133793	2862	E17.5	C262	0.0329614	7.17358	-1.35271	S	Seuratcds	1163305	5145	2	2	2_1
C265	2	2100028	4192	E17.5	C265	0.0304101	-124.187	-206.189	G1	Seuratcds	1208135	4166	2	2	2_0
C270	2	2029856	4864	E17.5	C270	0.0322437	-147.834	-239.798	G1	Seuratcds	1208558	4849	2	2	2_0
C271	11	1704333	5804	E17.5	C271	0.0302693	462.342	164.747	S	Seuratcds	1205763	5781	11	11	11
C276	7	2344464	3055	E17.5	C276	0.0232104	-208.95	-201.508	G1	Seuratcds	1208258	2801	7	7	7
C278	2	34046	3085	E17.5	C278	0.0752805	-1.10258	-0.972978	G1	Seuratcds	1186666	12964	2	2	2_0
C281	2	1560028	3472	E17.5	C281	0.0207067	-144.209	-138.692	G1	Seuratcds	1209803	3461	2	2	2_1
C293	2	1870188	3480	E17.5	C293	0.0251969	-54.9071	453.938	G2M	Seuratcds	1207001	3468	2	2	2_0
C305	1	293856	2217	E14.5	C305	0.029477	0.155146	-31.8242	S	Seuratcds	1192512	2559	1	1	1
C309	9	1395125	6476	E14.5	C309	0.0190771	265.845	-34.4712	S	Seuratcds	1205732	6456	9	9	9
C310	3	752766	2986	E14.5	C310	0.0349192	-1.11802	56.7693	G2M	Seuratcds	1199848	2983	3	3	3
C311	1	764997	4660	E14.5	C311	0.0272236	-73.2367	-76.0314	G1	Seuratcds	1194881	4624	1	1	1
C316	6	829621	4979	E14.5	C316	0.0242882	100.538	138.312	G2M	Seuratcds	1198641	4971	6	6	6
C317	1	582514	4179	E14.5	C317	0.0192802	-28.1648	-51.5227	G1	Seuratcds	1186339	4169	1	1	1
C321	9	1333395	4496	E14.5	C321	0.0223355	50.0014	307.11	G2M	Seuratcds	1205402	4488	9	9	9
C326	1	648828	3353	E14.5	C326	0.0320979	-46.5946	-78.5696	G1	Seuratcds	1191069	3344	1	1	1
C327	1	555889	2835	E14.5	C327	0.0245391	-57.526	-50.1576	G1	Seuratcds	1190714	2838	1	1	1
C333	1	677980	4194	E14.5	C333	0.0216496	-34.9259	-52.2463	G1	Seuratcds	1191721	4175	1	1	1
C335	1	166187	2442	E14.5	C335	0.0357188	-15.0952	-17.5916	G1	Seuratcds	1183125	3624	1	1	1
C339	0	1039833	5118	E14.5	C339	0.0230172	138.081	87.0772	S	Seuratcds	1201851	5103	0	0	0
C344	1	676628	4787	E14.5	C344	0.0228072	-34.8594	-60.1941	G1	Seuratcds	1197786	4776	1	1	1
C346	7	854153	2881	E14.5	C346	0.0284282	-69.0887	-106.894	G1	Seuratcds	1202081	2878	7	7	7
C350	9	893297	4699	E14.5	C350	0.0273257	-30.5073	430.783	G2M	Seuratcds	1200100	4684	9	9	9
C351	1	622930	3338	E14.5	C351	0.0229448	-24.8029	-64.8775	G1	Seuratcds	1194008	3330	1	1	1
C353	1	427509	3219	E14.5	C353	0.0251012	-29.0707	-40.97	G1	Seuratcds	1188934	3266	1	1	1
C354	9	667224	3525	E14.5	C354	0.0204504	-38.6358	-69.5466	G1	Seuratcds	1198518	3513	9	9	9
C355	1	555423	2869	E14.5	C355	0.0315867	-48.5608	-57.7011	G1	Seuratcds	1196611	2880	1	1	1
C356	1	557708	2730	E14.5	C356	0.025759	-31.0291	-57.3943	G1	Seuratcds	1194463	2731	1	1	1
C358	1	237660	2570	E14.5	C358	0.0282715	-6.40416	-18.084	G1	Seuratcds	1186688	3084	1	1	1
C360	1	911138	3799	E14.5	C360	0.0221361	-57.5882	-91.5003	G1	Seuratcds	1200215	3786	1	1	1
C361	1	474712	2908	E14.5	C361	0.0478543	-22.617	-54.4835	G1	Seuratcds	1194061	2927	1	1	1
C364	9	406106	5573	E14.5	C364	0.0194358	-32.4699	-37.5562	G1	Seuratcds	1179662	5557	9	9	9
C365	1	551252	2808	E14.5	C365	0.0287836	-12.8987	-64.6049	G1	Seuratcds	1194497	2818	1	1	1
C366	9	198084	2735	E14.5	C366	0.0238586	-12.2878	86.195	G2M	Seuratcds	1187628	3469	9	9	9
C368	1	539584	2495	E14.5	C368	0.0287184	-34.2944	-65.2946	G1	Seuratcds	1191567	2512	1	1	1
C369	1	79133	2456	E14.5	C369	0.0248948	-4.80739	-10.0058	G1	Seuratcds	1191715	8367	1	1	1
C370	9	700654	5156	E14.5	C370	0.0226817	-25.8059	-78.4972	G1	Seuratcds	1198068	5142	9	9	9
C371	1	599445	2793	E14.5	C371	0.0253151	-35.3724	-65.0511	G1	Seuratcds	1195516	2795	1	1	1
C372	9	840703	3628	E14.5	C372	0.0182621	-54.0543	-60.0674	G1	Seuratcds	1198587	3623	9	9	9
C374	1	824542	3252	E14.5	C374	0.0200887	-69.6499	-84.0927	G1	Seuratcds	1197721	3246	1	1	1
C375	3	596841	3263	E14.5	C375	0.0364955	-31.0765	-55.9934	G1	Seuratcds	1196426	3262	3	3	3
C376	1	400573	2259	E14.5	C376	0.0211297	-24.4031	-26.3526	G1	Seuratcds	1186374	2373	1	1	1
C377	1	436900	3511	E14.5	C377	0.031149	72.7881	-3.43153	S	Seuratcds	1193865	3542	1	1	1
C380	7	691806	4632	E14.5	C380	0.0276725	-9.92567	-77.6747	G1	Seuratcds	1201240	4612	7	7	7
C382	1	947427	2771	E14.5	C382	0.0143135	-103.799	-92.7328	G1	Seuratcds	1197982	2764	1	1	1
C386	9	768932	3686	E14.5	C386	0.0297074	43.8962	-88.1688	S	Seuratcds	1201061	3682	9	9	9
C403	3	124983	2041	E14.5	C403	0.0552155	-13.7468	1.85712	G2M	Seuratcds	1179374	5122	3	3	3
C405	0	1003888	5434	E14.5	C405	0.0246133	50.5855	122.114	G2M	Seuratcds	1202560	5425	0	0	0
C406	10	765765	4836	E14.5	C406	0.0429139	26.8813	-80.4144	S	Seuratcds	1201523	4819	10	10	10
C407	8	498029	3141	E14.5	C407	0.0353453	-36.5992	-32.5737	G1	Seuratcds	1194947	3148	8	8	8
C409	5	1291146	4555	E14.5	C409	0.0266538	-89.7598	-142.787	G1	Seuratcds	1203668	4539	5	5	5
C416	0	449988	4311	E14.5	C416	0.0298875	-42.1836	-54.6751	G1	Seuratcds	1189868	4312	0	0	0
C417	6	749068	5189	E14.5	C417	0.0294045	-37.749	-79.0999	G1	Seuratcds	1201036	5181	6	6	6
C419	0	1334673	5988	E14.5	C419	0.0272134	35.9653	507.06	G2M	Seuratcds	1204802	5977	0	0	0
C420	5	568749	4980	E14.5	C420	0.0353724	-27.1678	-31.8384	G1	Seuratcds	1198601	4971	5	5	5
C424	12	775494	4158	E14.5	C424	0.0330499	77.3059	51.167	S	Seuratcds	1201594	4150	12	12	12
C431	8	1387195	3764	E14.5	C431	0.0184639	-114.936	-145.85	G1	Seuratcds	1205474	3758	8	8	8
C436	8	357158	3173	E14.5	C436	0.033425	-13.9976	-35.5302	G1	Seuratcds	1191845	3251	8	8	8
C437	0	1199421	6011	E14.5	C437	0.0278193	185.466	37.8512	S	Seuratcds	1203656	5993	0	0	0
C440	12	1118060	3610	E14.5	C440	0.0273536	-54.7672	-95.5472	G1	Seuratcds	1203650	3604	12	12	12
C441	0	619223	4550	E14.5	C441	0.029172	142.251	33.6926	S	Seuratcds	1199374	4543	0	0	0
C442	0	1135674	4123	E14.5	C442	0.0224809	-70.5052	-125.634	G1	Seuratcds	1203671	4118	0	0	0
C444	5	1361302	5011	E14.5	C444	0.0306934	-68.5323	-150.661	G1	Seuratcds	1204277	4999	5	5	5
C446	0	1069292	2455	E14.5	C446	0.0216414	-33.6893	-62.2636	G1	Seuratcds	1203513	2447	0	0	0
C447	0	764679	6201	E14.5	C447	0.0276717	-7.59234	30.0341	G2M	Seuratcds	1200822	6188	0	0	0
C451	12	778300	3822	E14.5	C451	0.0384106	-26.3316	13.3098	G2M	Seuratcds	1201963	3812	12	12	12
C453	0	1293287	3777	E14.5	C453	0.0199855	-84.0885	-109.477	G1	Seuratcds	1204921	3769	0	0	0
C454	6	1205699	3810	E14.5	C454	0.024259	-73.5038	-106.827	G1	Seuratcds	1204658	3804	6	6	6
C455	5	850353	3207	E14.5	C455	0.0320196	-27.0467	-93.5283	G1	Seuratcds	1201996	3205	5	5	5
C456	0	645315	4742	E14.5	C456	0.0318046	0.192268	-59.363	S	Seuratcds	1199987	4730	0	0	0
C457	5	473471	4239	E14.5	C457	0.0421779	10.5008	-49.654	S	Seuratcds	1193031	4231	5	5	5
C458	0	982296	4116	E14.5	C458	0.0304827	-21.2469	-71.704	G1	Seuratcds	1200851	4102	0	0	0
C459	8	245215	3214	E14.5	C459	0.0358583	-7.17964	-25.14	G1	Seuratcds	1191056	3547	8	8	8
C461	5	249901	3127	E14.5	C461	0.0368026	-15.3854	-25.254	G1	Seuratcds	1191955	3437	5	5	5
C464	0	1237964	4857	E14.5	C464	0.0267827	-17.1959	325.582	G2M	Seuratcds	1203915	4850	0	0	0
C465	0	672239	4409	E14.5	C465	0.0400081	38.8169	117.543	G2M	Seuratcds	1200729	4400	0	0	0
C466	0	1881731	4790	E14.5	C466	0.0241846	-112.021	-190.403	G1	Seuratcds	1206049	4778	0	0	0
C468	0	1203387	5224	E14.5	C468	0.0309427	-51.1614	291.391	G2M	Seuratcds	1203301	5211	0	0	0
C477	6	883510	5352	E14.5	C477	0.0255843	169.066	78.206	S	Seuratcds	1201119	5338	6	6	6
C485	1	732395	3313	E14.5	C485	0.0318025	-46.7574	-71.457	G1	Seuratcds	1198077	3306	1	1	1
C486	5	1357367	4183	E14.5	C486	0.0256298	-73.741	-136.261	G1	Seuratcds	1204000	4174	5	5	5
C489	3	746265	3277	E14.5	C489	0.0367497	-52.6226	-81.4509	G1	Seuratcds	1200908	3275	3	3	3
C492	6	1168441	4625	E14.5	C492	0.0235331	227.269	256.461	G2M	Seuratcds	1203238	4616	6	6	6
C496	0	1306722	3645	E14.5	C496	0.0272552	-50.9154	38.5317	G2M	Seuratcds	1203010	3640	0	0	0
C503	8	448907	2971	E11.5	C503	0.042472	-21.5625	-60.2785	G1	Seuratcds	1192766	3010	8	8	8
C507	5	2339948	4428	E11.5	C507	0.0307725	-201.965	-51.7202	G1	Seuratcds	1207955	4245	5	5	5
C510	3	539391	3176	E11.5	C510	0.0382227	-5.47585	-64.8935	G1	Seuratcds	1195550	3179	3	3	3
C511	3	936363	3386	E11.5	C511	0.0343691	-58.7129	-45.1045	G1	Seuratcds	1202515	3381	3	3	3
C512	8	1139137	3753	E11.5	C512	0.036417	78.9258	-94.6751	S	Seuratcds	1203311	3745	8	8	8
C513	3	321428	3711	E11.5	C513	0.0943602	-5.99855	8.08461	G2M	Seuratcds	1182814	3777	3	3	3
C515	1	1935488	4642	E11.5	C515	0.0311193	-93.3842	861.501	G2M	Seuratcds	1208247	4630	1	1	1
C516	3	249814	4565	E11.5	C516	0.0888541	-10.5758	-28.9828	G1	Seuratcds	1181998	4694	3	3	3
C519	1	2175144	5576	E11.5	C519	0.0316696	-17.4307	1157.01	G2M	Seuratcds	1209912	5536	1	1	1
C524	3	1108452	3978	E11.5	C524	0.055979	-80.283	-77.6857	G1	Seuratcds	1203330	3970	3	3	3
C525	3	693708	3539	E11.5	C525	0.0317843	-52.3036	-77.6601	G1	Seuratcds	1196542	3526	3	3	3
C527	5	1436158	4200	E11.5	C527	0.0436686	-107.894	-100.767	G1	Seuratcds	1205560	4190	5	5	5
C531	5	1710198	5292	E11.5	C531	0.0297182	240.689	80.1221	S	Seuratcds	1205812	5284	5	5	5
C534	3	206602	3457	E11.5	C534	0.0807301	19.7642	-8.40178	S	Seuratcds	1176553	4018	3	3	3
C540	3	1213136	3463	E11.5	C540	0.0525209	-73.1949	-131.335	G1	Seuratcds	1204325	3456	3	3	3
C546	3	193145	3755	E11.5	C546	0.0943281	2.9971	-17.2622	S	Seuratcds	1175405	4331	3	3	3
C551	12	356816	2996	E11.5	C551	0.0536019	28.3168	11.02	S	Seuratcds	1186266	3101	12	12	12
C552	5	1989606	4002	E11.5	C552	0.026644	-157.436	-239.264	G1	Seuratcds	1209848	3990	5	5	5
C555	5	283158	3324	E11.5	C555	0.0693005	-10.9175	4.20196	G2M	Seuratcds	1181798	3528	5	5	5
C556	3	477763	3537	E11.5	C556	0.0684817	77.5405	-11.4778	S	Seuratcds	1188109	3538	3	3	3
C557	3	284954	2899	E11.5	C557	0.0823887	94.7223	-17.6742	S	Seuratcds	1179498	3170	3	3	3
C558	3	1898728	3976	E11.5	C558	0.0298942	-107.019	-199.271	G1	Seuratcds	1207433	3966	3	3	3
C560	1	1587789	4747	E11.5	C560	0.0320175	232.534	-105.012	S	Seuratcds	1205343	4722	1	1	1
C562	5	1864700	4888	E11.5	C562	0.0382555	-71.8528	400.358	G2M	Seuratcds	1207511	4875	5	5	5
C564	5	1697071	4689	E11.5	C564	0.0303517	-145.337	-170.896	G1	Seuratcds	1206300	4670	5	5	5
C567	3	370415	3600	E11.5	C567	0.0589312	-8.14525	-41.5097	G1	Seuratcds	1185440	3650	3	3	3
C568	3	703828	3498	E11.5	C568	0.0297686	-39.1404	-78.0111	G1	Seuratcds	1198561	3488	3	3	3
C569	3	343548	3392	E11.5	C569	0.0777126	-11.4367	-50.8661	G1	Seuratcds	1185938	3448	3	3	3
C573	0	1610279	5271	E11.5	C573	0.0352293	116.56	187.298	G2M	Seuratcds	1205619	5255	0	0	0
C574	12	1761065	5053	E11.5	C574	0.0312368	95.7634	252.933	G2M	Seuratcds	1207740	5036	12	12	12
C575	3	411561	4404	E11.5	C575	0.0519364	-32.4962	-41.088	G1	Seuratcds	1189978	4398	3	3	3
C577	3	453366	3027	E11.5	C577	0.0472047	-33.1661	-53.6624	G1	Seuratcds	1194196	3055	3	3	3
C580	5	1909353	4722	E11.5	C580	0.0338649	-140.678	-217.221	G1	Seuratcds	1209489	4706	5	5	5
C590	8	582530	3808	E11.5	C590	0.0355209	-11.2984	-50.2996	G1	Seuratcds	1196459	3799	8	8	8
C601	0	1903656	3601	E12.5	C601	0.018673	-174.808	-185.741	G1	Seuratcds	1209195	3588	0	0	0
C602	12	1621589	4592	E12.5	C602	0.0265887	-87.907	444.01	G2M	Seuratcds	1207052	4584	12	12	12
C603	3	1625081	3548	E12.5	C603	0.032999	-75.092	-160.555	G1	Seuratcds	1205809	3504	3	3	3
C605	0	2239123	3910	E12.5	C605	0.0300689	320.159	-164.517	S	Seuratcds	1209386	3847	0	0	0
C611	8	1499018	2823	E12.5	C611	0.0327541	-152.277	-143.901	G1	Seuratcds	1209879	2816	8	8	8
C617	8	513192	2668	E12.5	C617	0.0343146	-15.789	-30.6296	G1	Seuratcds	1194761	2680	8	8	8
C618	8	870430	2801	E12.5	C618	0.036752	-42.807	-90.7008	G1	Seuratcds	1200894	2788	8	8	8
C619	5	1430454	3881	E12.5	C619	0.0246397	41.4176	-109.62	S	Seuratcds	1205242	3873	5	5	5
C622	3	523011	2167	E12.5	C622	0.0297546	-38.3131	-20.6312	G1	Seuratcds	1194712	2199	3	3	3
C625	0	1974025	3696	E12.5	C625	0.0168767	-53.91	-214.097	G1	Seuratcds	1210650	3688	0	0	0
C626	8	464500	2196	E12.5	C626	0.0318278	-31.1978	-62.7163	G1	Seuratcds	1192587	2255	8	8	8
C627	0	2045707	5067	E12.5	C627	0.0222969	-99.502	293.662	G2M	Seuratcds	1214251	5051	0	0	0
C630	3	967249	2923	E12.5	C630	0.0304182	-36.929	-16.805	G1	Seuratcds	1201847	2888	3	3	3
C633	0	1656070	4191	E12.5	C633	0.0243607	-53.6423	228.836	G2M	Seuratcds	1209319	4159	0	0	0
C635	0	933451	2777	E12.5	C635	0.0251508	-8.95144	-58.6493	G1	Seuratcds	1196375	2772	0	0	0
C636	8	1142893	4205	E12.5	C636	0.0391296	-58.4181	-80.3256	G1	Seuratcds	1203210	4174	8	8	8
C643	6	2317401	2439	E12.5	C643	0.0260076	-126.679	-272.514	G1	Seuratcds	1211848	2321	6	6	6
C647	0	3000016	3128	E12.5	C647	0.0212929	-113.337	-159.913	G1	Seuratcds	1214455	2947	0	0	0
C650	0	620689	2451	E12.5	C650	0.0304919	-59.9297	-80.4422	G1	Seuratcds	1194331	2449	0	0	0
C654	0	2146257	3596	E12.5	C654	0.0226986	71.1331	-211.908	S	Seuratcds	1215663	3559	0	0	0
C655	8	427932	2092	E12.5	C655	0.0407752	-47.1752	-48.8212	G1	Seuratcds	1184367	2218	8	8	8
C658	0	353294	3310	E12.5	C658	0.0336971	-9.89409	-39.9162	G1	Seuratcds	1189976	3378	0	0	0
C659	0	1771916	2810	E12.5	C659	0.023259	-199.006	-151.059	G1	Seuratcds	1213885	2795	0	0	0
C660	0	2170248	2844	E12.5	C660	0.0200249	-178.862	-271.141	G1	Seuratcds	1214512	2797	0	0	0
C661	3	381727	2202	E12.5	C661	0.0436464	-23.8484	-33.7904	G1	Seuratcds	1191747	2327	3	3	3
C662	6	2129493	3118	E12.5	C662	0.0181517	-97.2209	-178.029	G1	Seuratcds	1213378	3092	6	6	6
C664	1	2285800	4029	E12.5	C664	0.0176162	26.9326	963.277	G2M	Seuratcds	1216916	3973	1	1	1
C666	1	1545336	4239	E12.5	C666	0.0221842	16.0597	935.357	G2M	Seuratcds	1207323	4231	1	1	1
C667	12	543523	3090	E12.5	C667	0.0354815	13.8506	143.982	G2M	Seuratcds	1198515	3097	12	12	12
C668	6	1935834	4468	E12.5	C668	0.0257584	-193.937	-179.458	G1	Seuratcds	1216019	4458	6	6	6
C670	0	2134607	2921	E12.5	C670	0.0269464	-240.692	-156.707	G1	Seuratcds	1213764	2888	0	0	0
C672	0	1688914	3366	E12.5	C672	0.017008	-158.302	-146.813	G1	Seuratcds	1214066	3358	0	0	0
C673	3	745702	2416	E12.5	C673	0.0328617	65.5304	-57.2305	S	Seuratcds	1200454	2412	3	3	3
C674	5	2363007	4082	E12.5	C674	0.0328069	-80.2022	-177.006	G1	Seuratcds	1207817	3915	5	5	5
C701	0	1076573	6433	E12.5	C701	0.0285508	61.8555	116.774	G2M	Seuratcds	1203207	6417	0	0	0
C708	8	1224279	4840	E12.5	C708	0.0374326	-71.3099	-143.528	G1	Seuratcds	1203827	4829	8	8	8
C709	5	944915	4791	E12.5	C709	0.0375039	-41.4935	343.152	G2M	Seuratcds	1201380	4781	5	5	5
C710	12	725742	4050	E12.5	C710	0.034978	-10.7112	29.9016	G2M	Seuratcds	1200755	4012	12	12	12
C711	3	114281	2213	E12.5	C711	0.0485558	-8.47448	-15.6766	G1	Seuratcds	1168490	5848	3	3	3
C712	5	824221	3353	E12.5	C712	0.0452876	-40.4246	-75.1663	G1	Seuratcds	1199646	3345	5	5	5
C713	6	2100946	6127	E12.5	C713	0.0309046	-34.2923	-158.405	G1	Seuratcds	1207344	6108	6	6	6
C715	6	1166452	4017	E12.5	C715	0.0275108	-82.1502	-103.358	G1	Seuratcds	1202978	4004	6	6	6
C716	6	1037985	7268	E12.5	C716	0.0343579	95.5612	-2.27665	S	Seuratcds	1201737	7244	6	6	6
C721	6	833652	5428	E12.5	C721	0.028687	-63.1057	-83.1831	G1	Seuratcds	1198057	5413	6	6	6
C722	5	1248649	6631	E12.5	C722	0.0773524	-33.6124	-60.3212	G1	Seuratcds	1201766	6591	5	5	5
C723	6	1226376	4771	E12.5	C723	0.0319347	-83.544	-105.514	G1	Seuratcds	1200939	4709	6	6	6
C724	8	1261575	3437	E12.5	C724	0.031123	-79.9837	-99.9063	G1	Seuratcds	1204055	3429	8	8	8
C725	5	1378605	5627	E12.5	C725	0.0292259	350.76	-92.049	S	Seuratcds	1204763	5614	5	5	5
C726	8	1318682	4230	E12.5	C726	0.0411145	-94.7184	-141.616	G1	Seuratcds	1205129	4208	8	8	8
C727	6	1757070	6184	E12.5	C727	0.0279579	233.707	-123.999	S	Seuratcds	1208113	6177	6	6	6
C728	8	1365528	5044	E12.5	C728	0.0328415	-91.4619	-128.045	G1	Seuratcds	1202959	5030	8	8	8
C729	6	1596522	4918	E12.5	C729	0.0255424	-94.2786	-167.343	G1	Seuratcds	1206615	4900	6	6	6
C731	0	1186109	3264	E12.5	C731	0.0248577	-79.9689	-99.668	G1	Seuratcds	1202985	3258	0	0	0
C736	5	1466292	5723	E12.5	C736	0.0325044	-33.9461	75.1481	G2M	Seuratcds	1205041	5710	5	5	5
C737	8	990904	3302	E12.5	C737	0.0322998	-54.8683	-110.988	G1	Seuratcds	1202288	3296	8	8	8
C739	1	1914783	5916	E12.5	C739	0.0305737	102.838	-174.526	S	Seuratcds	1206983	5894	1	1	1
C740	6	1221227	5368	E12.5	C740	0.0369276	-72.8725	-105.005	G1	Seuratcds	1203763	5343	6	6	6
C743	6	1290172	3897	E12.5	C743	0.0252594	-97.9865	-144.749	G1	Seuratcds	1204736	3886	6	6	6
C744	5	1345220	4264	E12.5	C744	0.0376652	-97.4246	-131.411	G1	Seuratcds	1204593	4255	5	5	5
C752	0	1304206	4700	E12.5	C752	0.0255872	-78.3641	109.979	G2M	Seuratcds	1204228	4680	0	0	0
C753	6	1098627	4431	E12.5	C753	0.0348617	-31.4636	-127.664	G1	Seuratcds	1203318	4425	6	6	6
C755	5	1845417	6547	E12.5	C755	0.0723538	86.4923	-38.2367	S	Seuratcds	1204683	6504	5	5	5
C757	12	1384264	4117	E12.5	C757	0.0399006	-76.6544	-125.446	G1	Seuratcds	1206086	4104	12	12	12
C762	6	1829743	6999	E12.5	C762	0.0287592	7.02355	427.936	G2M	Seuratcds	1207092	6981	6	6	6
C763	3	1064180	3535	E12.5	C763	0.040464	-44.7316	-98.6288	G1	Seuratcds	1202278	3525	3	3	3
C766	6	2132323	4653	E12.5	C766	0.0228971	-118.337	-191.803	G1	Seuratcds	1210689	4638	6	6	6
C769	6	1338401	4115	E12.5	C769	0.0394	-12.6412	-122.48	G1	Seuratcds	1205122	4109	6	6	6
C770	0	1236407	3564	E12.5	C770	0.0288942	-40.9384	-128.685	G1	Seuratcds	1204790	3561	0	0	0
C772	0	1993318	6241	E12.5	C772	0.0273975	67.0006	590.988	G2M	Seuratcds	1208369	6226	0	0	0
C773	12	849845	5008	E12.5	C773	0.0361795	163.614	-5.91476	S	Seuratcds	1198893	4953	12	12	12
C775	5	1319616	4125	E12.5	C775	0.0381171	-83.115	-129.443	G1	Seuratcds	1204142	4114	5	5	5
C780	6	1953638	6073	E12.5	C780	0.0245931	208.668	124.05	S	Seuratcds	1208760	6058	6	6	6
C781	5	1113091	4992	E12.5	C781	0.0344734	-76.7115	-106.056	G1	Seuratcds	1203540	4963	5	5	5
C784	3	762152	3054	E12.5	C784	0.0590302	-42.7957	-73.5416	G1	Seuratcds	1197317	3043	3	3	3
C788	0	1444742	4128	E12.5	C788	0.0394818	-30.9587	197.949	G2M	Seuratcds	1203064	4113	0	0	0
C790	1	995331	3936	E12.5	C790	0.0298514	-45.8522	-97.8925	G1	Seuratcds	1201573	3924	1	1	1
C792	3	289545	2494	E12.5	C792	0.0451122	-20.8734	-36.0504	G1	Seuratcds	1188053	2792	3	3	3
C794	8	812197	3093	E12.5	C794	0.0406822	-50.0563	-98.8762	G1	Seuratcds	1199696	3090	8	8	8

## Sheet: FluidigmC1_DEGs
p_val	avg_log2FC	pct.1	pct.2	p_val_adj	cluster	gene
1.62922e-09	1.41922	1	0.934	2.28921e-05	0	Lum
4.25536e-09	1.33969	1	0.977	5.9792e-05	0	Vcan
3.24682e-08	2.40739	0.842	0.527	0.000456211	0	Asb4
1.61755e-07	2.93326	0.421	0.105	0.00227282	0	Zcchc12
6.4449e-07	1.72416	0.763	0.438	0.00905573	0	Tspan13
8.47602e-07	0.637698	1	1	0.0119097	0	H3f3b
9.11821e-07	0.673526	1	1	0.012812	0	Ywhae
1.97076e-06	0.923312	1	0.996	0.0276912	0	Marcks
3.26784e-06	0.86845	1	0.977	0.0459164	0	Sumo2
3.27525e-06	1.25092	0.895	0.824	0.0460205	0	Tcf12
3.31819e-06	1.05122	0.974	0.988	0.0466239	0	H2afz
4.91753e-06	0.834014	1	1	0.0690963	0	Hmgb1
5.74532e-06	0.70536	1	0.992	0.0807275	0	Hmgn2
7.42937e-06	3.20644	0.289	0.066	0.10439	0	Hspbap1
7.85505e-06	1.10926	1	0.996	0.110371	0	Eif4g2
9.67618e-06	1.62691	0.816	0.703	0.13596	0	Smc2
2.2446e-05	1.05033	0.947	0.922	0.315388	0	Ppp2ca
2.52307e-05	0.790154	0.974	0.91	0.354516	0	Rbbp7
2.81881e-05	1.22042	0.868	0.738	0.39607	0	Twist1
2.92435e-05	1.09863	0.895	0.758	0.4109	0	Gpbp1
4.92745e-05	1.02993	0.868	0.879	0.692357	0	Pgrmc1
5.99303e-05	0.729835	1	0.996	0.842081	0	Ddx5
7.80237e-05	2.41927	0.342	0.109	1	0	Mtfr2
8.85296e-05	0.616816	1	1	1	0	Srsf11
0.000108406	0.676233	1	1	1	0	Hnrnpk
0.00012237	0.667189	0.974	0.992	1	0	Mir684-1
0.000129217	3.7623	0.447	0.23	1	0	Mstn
0.000135535	1.02423	0.842	0.516	1	0	Jarid2
0.00014772	0.94382	1	0.926	1	0	Meis2
0.000155136	0.676113	0.974	0.914	1	0	Mir684-2
0.000161825	0.768503	0.974	0.941	1	0	Cct5
0.000177762	0.936139	0.868	0.867	1	0	Cycs
0.000178884	1.56436	0.921	0.871	1	0	Igf1
0.000182967	0.961379	0.974	0.883	1	0	Ivns1abp
0.000196261	1.70528	0.316	0.102	1	0	Raet1e
0.000196284	0.608494	1	0.992	1	0	Hnrnpa2b1
0.000277279	2.05411	0.553	0.281	1	0	Peg10
0.000297731	1.1095	0.868	0.777	1	0	Cpsf6
0.000339731	0.814286	0.816	0.477	1	0	Unc5c
0.000419608	0.867015	0.974	0.992	1	0	Pdia3
0.000425855	3.10632	0.263	0.082	1	0	Scfd2
0.000427782	1.04002	0.895	0.805	1	0	Cul4b
0.000432672	0.890534	1	0.984	1	0	Hnrnpm
0.00043908	0.696728	0.079	0.41	1	0	Gm10033
0.000514206	0.739601	1	0.992	1	0	Dnaja1
0.00051545	0.761237	0.816	0.629	1	0	Taf1
0.000525447	1.08811	0.842	0.711	1	0	Mapk6
0.00054632	0.807145	1	0.977	1	0	Srsf10
0.000561013	0.664384	1	0.98	1	0	Dync1i2
0.000630784	0.537964	1	1	1	0	Hsp90b1
0.000648727	1.00361	0.763	0.516	1	0	Pbx2
0.000692524	1.01501	0.921	0.98	1	0	Id2
0.00069411	1.10462	0.895	0.844	1	0	Slc12a2
0.000785717	1.20464	0.816	0.723	1	0	Commd3
0.000861687	0.703877	1	0.973	1	0	Snrpe
0.000940345	0.995866	0.816	0.68	1	0	Pbx3
0.000976696	0.696895	0.947	0.871	1	0	Pdgfra
0.00099782	0.771177	0.868	0.785	1	0	Rad21
0.000998137	0.822519	0.895	0.867	1	0	Adam19
0.00102604	0.655293	0.895	0.797	1	0	Polr2k
0.00102907	0.524754	0.947	0.902	1	0	1110004F10Rik
0.00103058	0.509599	1	1	1	0	Ywhaz
0.00107106	1.91436	0.5	0.297	1	0	Skp2
0.00108033	1.69308	0.395	0.184	1	0	Sqle
0.00108207	0.590601	0.816	0.707	1	0	Slc35b1
0.00111509	0.513089	0.947	0.957	1	0	Paip2
0.00116393	0.721519	0.816	0.801	1	0	Sugt1
0.00118618	0.466896	1	0.996	1	0	Gm5643
0.00119048	0.651507	0.947	0.988	1	0	Sf3b1
0.00122681	1.1555	0.842	0.941	1	0	Hdac2
0.00123925	1.18278	0.447	0.207	1	0	Bcl2l13
0.00126498	0.634559	0.947	0.973	1	0	Srsf7
0.00128796	0.449925	0.974	1	1	0	Hmgn1
0.00131215	0.95303	0.895	0.898	1	0	Cct4
0.0013146	0.929835	0.947	0.906	1	0	Mecom
0.0013421	1.19254	0.868	0.738	1	0	Ubqln2
0.00137636	1.31831	0.763	0.738	1	0	Gtf2e2
0.00140263	0.573096	1	1	1	0	Calm2
0.00141762	0.450969	1	1	1	0	Tuba1a
0.00142989	0.788178	0.947	0.93	1	0	Ssb
0.00143673	1.06199	0.579	0.34	1	0	Eif2b4
0.00147931	0.648385	0.921	0.809	1	0	Hmgb3
0.00154076	2.05807	0.263	0.094	1	0	Gtse1
0.00159173	2.10758	0.684	0.543	1	0	Ormdl1
0.00166808	1.24145	0.026	0.27	1	0	Svip
0.00171437	0.816271	0.737	0.52	1	0	D930015E06Rik
0.00175059	0.90079	0.974	0.91	1	0	Zcchc11
0.0017799	1.49917	0.368	0.16	1	0	Dnaaf2
0.00201938	0.5426	0.974	0.926	1	0	Atxn10
0.00205155	0.465537	1	0.996	1	0	Morf4l1-ps1
0.00209814	1.19351	0.921	0.902	1	0	Arid4b
0.00210357	1.2191	0.553	0.309	1	0	Slc1a3
0.0021626	1.00842	0.711	0.531	1	0	Asap2
0.0022053	1.58984	0.579	0.406	1	0	Ctage5
0.00238794	1.48939	0.316	0.129	1	0	Poc1a
0.00248062	1.3702	0.684	0.629	1	0	Immt
0.00248299	0.6248	1	0.984	1	0	2022-09-07
0.00259272	1.35924	0.895	0.855	1	0	Fnbp1l
0.00261219	1.20365	0.789	0.645	1	0	Pcf11
0.0026317	0.627032	0.947	0.867	1	0	Alyref
0.00263727	1.5025	0.763	0.703	1	0	Fmr1
0.0026803	0.72623	0.868	0.871	1	0	Ndn
0.00268133	1.39597	0.789	0.809	1	0	Rab18
0.00268969	0.689669	1	0.941	1	0	Sarnp
0.0028934	0.808367	0.816	0.766	1	0	Timm23
0.00303206	1.11558	0.868	0.801	1	0	Nrk
0.00305631	0.753797	1	1	1	0	Npm1
0.00315539	0.713401	0.868	0.855	1	0	Fkbp3
0.00322355	0.647601	0.868	0.895	1	0	Ccdc88a
0.00323811	1.23116	0.368	0.168	1	0	Fam122b
0.00325216	0.642712	0.368	0.16	1	0	Rad9a
0.00332277	1.40303	0.421	0.223	1	0	Scyl3
0.0033392	2.02581	0.5	0.355	1	0	Kif22
0.0033463	1.41758	0.737	0.629	1	0	Sucla2
0.00336303	1.30481	0.474	0.238	1	0	Suv39h1
0.00341767	0.411042	0.711	0.453	1	0	Dlg5
0.00343902	0.591516	0.947	0.945	1	0	Bclaf1
0.00345355	1.04736	0.553	0.344	1	0	9030624G23Rik
0.00346371	2.05632	0.263	0.098	1	0	Fem1c
0.00356224	1.27676	0.895	0.898	1	0	Caprin1
0.0036157	0.428	1	1	1	0	Sub1
0.00364878	1.68262	0.474	0.309	1	0	Ddx19b
0.00374807	0.977255	0.789	0.707	1	0	Flrt3
0.00376024	0.439791	1	0.996	1	0	Morf4l1
0.00382678	1.06185	0.395	0.203	1	0	Tril
0.00385678	1.45968	0.868	0.734	1	0	Brd7
0.00391391	0.838939	0.842	0.711	1	0	Mrps18c
0.00398685	1.3966	0.526	0.324	1	0	Pdhx
0.00402574	0.455177	0.947	0.988	1	0	Hnrnph1
0.00404783	1.03291	0.895	0.906	1	0	C430049B03Rik
0.0040812	0.878192	0.789	0.723	1	0	Snrpa1
0.00418693	1.19632	0.526	0.332	1	0	Glmn
0.00418944	1.43769	0.684	0.574	1	0	Hapln1
0.00419861	0.47007	1	0.992	1	0	Gng5
0.00423095	0.72803	0.947	0.93	1	0	Fubp1
0.00426978	1.77678	0.526	0.371	1	0	Vps26a
0.00438973	1.219	0.789	0.691	1	0	Cd24a
0.00447815	0.720795	0.763	0.695	1	0	Rnf4
0.0045114	2.97063	0.263	0.109	1	0	Zfp689
0.00451816	0.440055	0.921	0.906	1	0	H2afy
0.00463269	0.9797	0.868	0.852	1	0	Smarca5
0.00516609	1.61218	0.263	0.105	1	0	Skida1
0.00523202	0.587239	0.974	0.957	1	0	Wsb1
0.00524693	0.914808	0.737	0.625	1	0	Sf3b4
0.00530296	1.20482	0.711	0.578	1	0	Ash2l
0.00532278	1.65304	0.579	0.41	1	0	Azi2
0.00536177	1.41576	0.711	0.695	1	0	Rest
0.00536822	0.824242	0.789	0.738	1	0	Nxf1
0.0054287	1.29777	0.711	0.578	1	0	Asf1a
0.00545384	1.41702	0.474	0.285	1	0	Trmt1l
0.00546412	1.0191	0.421	0.246	1	0	Kif4
0.00546618	1.87338	0.658	0.531	1	0	Ddx19a
0.00560067	1.90035	0.553	0.418	1	0	Epha3
0.00566207	0.516439	0.947	0.996	1	0	Morf4l2
0.00572257	1.19219	0.816	0.801	1	0	Mtf2
0.00576877	0.589653	0.947	0.977	1	0	Rdx
0.00577106	1.06453	0.816	0.742	1	0	Gspt1
0.0057917	1.19977	0.079	0.301	1	0	Ctso
0.00582205	0.444385	0.947	0.902	1	0	Tomm20
0.00584271	0.970083	0.842	0.895	1	0	Ccar1
0.00593952	1.91192	0.316	0.148	1	0	E130308A19Rik
0.00608385	0.366754	1	0.973	1	0	Pdlim3
0.00608819	0.532938	0.289	0.57	1	0	Mmp16
0.00609437	1.00292	0.842	0.715	1	0	Med14
0.00612915	1.0073	0.921	0.926	1	0	Zfp207
0.00613344	0.548748	0.842	0.777	1	0	Ilkap
0.00624846	1.41801	0.342	0.16	1	0	Snapc1
0.00634308	0.908695	0.921	0.93	1	0	Atp2b1
0.00653718	1.68591	0.526	0.395	1	0	Wdr37
0.00662359	1.74316	0.632	0.484	1	0	Cep120
0.00670502	0.657059	0.105	0.367	1	0	Atl3
0.00671845	0.789912	0.842	0.801	1	0	Btf3l4
0.00672241	0.357511	0.184	0.5	1	0	Ing2
0.00675427	0.481368	0.632	0.398	1	0	Ncoa5
0.00679175	0.836955	0.053	0.27	1	0	Pdp1
0.00688471	0.486081	1	0.969	1	0	Cnbp
0.00704831	0.681579	0.974	0.93	1	0	Cct6a
0.0071277	2.07472	0.289	0.137	1	0	Dnajc14
0.00718587	0.706303	0.316	0.141	1	0	Figf
0.00752103	0.794839	0.816	0.738	1	0	Myo1b
0.00752499	0.326719	1	0.988	1	0	Hnrnpab
0.00769054	1.18161	0.789	0.734	1	0	Laptm4b
0.007696	1.12627	0.447	0.285	1	0	Vopp1
0.00779443	0.595453	0.395	0.195	1	0	Grwd1
0.00781405	0.807343	0.711	0.527	1	0	Nvl
0.00787605	0.376248	0.974	0.996	1	0	Marcksl1
0.0078929	1.00239	0.5	0.332	1	0	Ddx41
0.00847049	0.553301	0.921	0.863	1	0	Khdrbs1
0.00849111	0.732156	0.895	0.797	1	0	Nptn
0.00863549	0.263073	0.474	0.262	1	0	Patz1
0.00866539	0.907088	0.474	0.297	1	0	Cdk5rap2
0.00867437	0.775086	0.868	0.84	1	0	Dlc1
0.00869337	0.693777	0.368	0.18	1	0	Pcyt2
0.00884105	0.704639	0.868	0.875	1	0	Pcnp
0.00885147	0.455298	0.947	0.965	1	0	Tspan3
0.00890748	0.737483	0.895	0.961	1	0	Eif5
0.00914276	0.719065	0.816	0.621	1	0	Sox5
0.00919592	0.75464	0.895	0.875	1	0	Trpm7
0.00927533	0.91897	0.658	0.543	1	0	Haus7
0.00927966	0.83181	0.921	0.934	1	0	U2surp
0.00938425	0.599721	0.921	0.898	1	0	Spcs2
0.00968892	2.28983	0.447	0.277	1	0	Zfp866
0.00972604	1.95311	0.605	0.547	1	0	Abce1
0.00982843	0.87863	0.868	0.84	1	0	Serpine2
0.00987278	0.442939	0.895	0.82	1	0	Gm5803
0.00998752	0.744932	0.079	0.285	1	0	Lrrtm2
2.82568e-08	1.50561	1	0.989	0.000397036	1	Fbn2
1.29434e-07	2.04308	0.438	0.107	0.00181868	1	Uty
2.45258e-06	1.3609	0.938	0.87	0.0344612	1	Egr1
3.02245e-06	1.6928	0.875	0.626	0.0424685	1	Ndrg2
3.81402e-06	1.05269	1	0.996	0.0535907	1	Nfib
8.97314e-06	1.72162	0.906	0.637	0.126082	1	Pkp4
1.49915e-05	1.84687	0.812	0.718	0.210646	1	Fat4
3.61576e-05	1.7755	0.844	0.748	0.50805	1	Dkk3
5.26598e-05	1.86406	0.844	0.622	0.739923	1	Psd3
9.44279e-05	1.68302	0.844	0.756	1	1	Fgfr2
0.000138552	0.882849	0.938	0.916	1	1	Rtf1
0.00013885	1.42344	0.969	0.927	1	1	Tcf4
0.000171016	2.22099	0.312	0.092	1	1	Slc11a2
0.000287257	0.961599	0.938	0.775	1	1	Ier2
0.00029173	1.16234	0.969	0.95	1	1	Tbx20
0.000419583	1.44391	0.781	0.595	1	1	Arih1
0.000447534	1.15885	0.938	0.95	1	1	Hnrnpa0
0.000477317	0.870946	0.906	0.794	1	1	Fos
0.000542811	1.41038	0.469	0.195	1	1	Tmem178
0.00054641	0.497582	0.969	0.844	1	1	Snora81
0.000587538	0.538672	1	1	1	1	Malat1
0.00068793	0.379468	0.219	0.637	1	1	Crebzf
0.000714793	1.46891	0.938	0.878	1	1	Fndc3b
0.000989253	0.557003	0.844	0.683	1	1	Nfkbia
0.00119757	2.55379	0.281	0.092	1	1	Fhod3
0.00138606	1.02695	1	0.939	1	1	Tsc22d1
0.00154099	0.914656	0.969	0.893	1	1	Igsf3
0.00170648	1.20575	0.094	0.412	1	1	Syvn1
0.00204617	1.58558	0.5	0.263	1	1	Atxn1l
0.00209537	1.69166	0.875	0.855	1	1	Fat1
0.00213608	0.8539	0.969	0.966	1	1	Eif4a2
0.00220503	1.07961	0.875	0.752	1	1	Zfp292
0.00230856	0.385896	0.031	0.298	1	1	Zfp2
0.00232157	0.642608	0.062	0.332	1	1	Efcab11
0.00234659	1.37383	0.906	0.817	1	1	Aff4
0.00236789	0.566319	1	0.981	1	1	Sf3b1
0.00245496	1.1766	0.938	0.863	1	1	Ccnl2
0.00246166	0.95707	0.875	0.771	1	1	Psme4
0.00265975	3.44803	0.25	0.084	1	1	Nrp2
0.00279817	0.971161	0.906	0.885	1	1	Chsy1
0.00300684	0.544913	1	1	1	1	Rbm39
0.0030399	1.18869	0.906	0.84	1	1	Phip
0.0032014	0.762595	0.969	0.935	1	1	Sox4
0.00327691	2.06961	0.656	0.397	1	1	Abi3bp
0.00335502	1.58769	0.781	0.672	1	1	Fbxo11
0.00338202	1.09599	0.875	0.71	1	1	Zfp827
0.00360289	2.63545	0.281	0.107	1	1	Klhl29
0.00400006	0.784855	0.938	0.809	1	1	Pmepa1
0.00404667	0.432214	0.156	0.454	1	1	Sptlc2
0.00406029	0.484431	0.969	0.981	1	1	Srsf5
0.00421566	1.2271	0.938	0.821	1	1	Smad7
0.00422054	0.774194	0.156	0.458	1	1	Nusap1
0.00441366	1.52176	0.531	0.321	1	1	Abca1
0.00459351	0.869036	0.094	0.374	1	1	Ccdc186
0.00467123	0.826231	0.031	0.271	1	1	Plscr4
0.00470068	0.779442	0.906	0.817	1	1	Ltbp3
0.00486894	1.15118	0.969	0.924	1	1	Tanc2
0.0049968	0.404257	0.125	0.408	1	1	Zfp799
0.00535877	0.632846	0.219	0.534	1	1	Prc1
0.00542249	0.938926	0.906	0.844	1	1	Slc12a2
0.00548827	0.571948	0.656	0.477	1	1	Fosb
0.00558415	0.970142	0.125	0.389	1	1	Cln8
0.00558687	0.595721	1	0.958	1	1	Atrx
0.00565648	1.14508	0.312	0.134	1	1	Zc3h3
0.00580286	1.3059	0.625	0.405	1	1	Tox
0.0060568	0.37014	0.281	0.107	1	1	Adam22
0.00621459	1.28454	0.031	0.26	1	1	Eepd1
0.0062739	1.90581	0.25	0.095	1	1	Arhgap33
0.00633684	1.67752	0.25	0.092	1	1	Zfp13
0.00655691	1.27841	0.75	0.649	1	1	Chd2
0.00675732	0.739776	0.938	0.874	1	1	Mgp
0.00696751	0.413981	0.062	0.305	1	1	Lrrc20
0.0070713	0.447529	0.062	0.313	1	1	Dpy19l3
0.00718383	0.895307	0.156	0.431	1	1	Mrps2
0.00733509	0.258906	0.281	0.588	1	1	Keap1
0.00772008	0.939293	0.625	0.408	1	1	Fmod
0.00774348	0.467314	0.25	0.527	1	1	Rpf2
0.00780155	0.950191	0.156	0.443	1	1	Blvra
0.00794481	1.95286	0.094	0.37	1	1	Pus7
0.00837334	0.576473	0.094	0.332	1	1	A430033K04Rik
0.00838357	0.361429	0.062	0.298	1	1	Tsr2
0.00857286	1.33587	0.625	0.481	1	1	Cxxc5
0.00860512	0.806959	0.938	0.92	1	1	Zc3h11a
0.00882057	0.755124	0.188	0.447	1	1	Stxbp6
0.00889624	1.08955	0.25	0.099	1	1	Mgat3
0.0090436	1.13362	0.094	0.34	1	1	Gypc
0.00906418	0.94745	0.938	0.794	1	1	Bptf
0.00964339	0.625164	0.25	0.095	1	1	Phf1
0.00967759	0.817206	0.781	0.615	1	1	Dusp1
0.00976326	0.744953	0.25	0.55	1	1	Top2a
0.00979273	0.516855	0.969	0.931	1	1	Meis2
0.00997479	0.866575	0.094	0.317	1	1	Lgr4
1.03594e-24	6.03015	0.471	0.007	1.45561e-20	2_0	Aldh1a2
8.02957e-15	4.44046	0.941	0.188	1.12823e-10	2_0	Abca8a
2.27178e-13	3.991	0.471	0.036	3.19207e-09	2_0	Irf8
2.64757e-11	2.46181	1	0.343	3.72011e-07	2_0	Dpt
5.41678e-11	2.22899	0.529	0.065	7.61112e-07	2_0	Ebf2
3.14008e-09	2.13812	0.941	0.325	4.41212e-05	2_0	Fndc1
7.19146e-09	2.56432	0.765	0.199	0.000101047	2_0	Zcchc5
1.23808e-08	0.601336	0.294	0.022	0.000173963	2_0	Alpl
1.30443e-08	1.89761	0.294	0.022	0.000183286	2_0	Hgf
1.88975e-08	2.91731	0.412	0.051	0.000265529	2_0	Mlycd
2.12646e-08	0.256399	0.529	0.083	0.000298789	2_0	Ppara
3.31942e-08	3.65688	0.529	0.083	0.000466412	2_0	Eva1c
1.46483e-07	0.491004	0.353	0.04	0.00205823	2_0	C9
1.52387e-07	2.23053	0.529	0.097	0.00214119	2_0	Abca9
1.84157e-07	2.31859	0.647	0.152	0.00258759	2_0	Fmo1
2.39835e-07	3.88037	0.294	0.029	0.00336992	2_0	Tifa
2.44016e-07	2.91982	0.765	0.245	0.00342867	2_0	Ablim1
2.57541e-07	2.75537	0.882	0.325	0.0036187	2_0	Dlk1
2.61214e-07	1.52803	0.353	0.043	0.00367032	2_0	Gm21188
2.66261e-07	2.57068	0.882	0.307	0.00374124	2_0	Vav3
2.86738e-07	2.34531	0.353	0.043	0.00402896	2_0	Tspan11
3.45572e-07	2.42221	0.353	0.043	0.00485564	2_0	Htra4
5.1898e-07	2.98508	0.824	0.318	0.00729218	2_0	Sparcl1
5.92537e-07	2.56194	0.765	0.242	0.00832574	2_0	Pid1
5.9747e-07	1.79035	0.824	0.285	0.00839505	2_0	Pi15
6.99816e-07	0.925271	0.824	0.26	0.00983311	2_0	Fam46a
8.20294e-07	2.78965	0.294	0.032	0.011526	2_0	Pla1a
8.2987e-07	2.00772	1	0.513	0.0116605	2_0	Col6a2
1.08307e-06	3.76559	0.412	0.069	0.0152182	2_0	Slc38a5
1.16449e-06	0.478556	0.412	0.069	0.0163623	2_0	Gdf10
2.19619e-06	4.6871	0.412	0.069	0.0308587	2_0	Steap3
2.20567e-06	1.94977	0.529	0.116	0.0309919	2_0	Nrbp2
2.24107e-06	2.05204	0.471	0.09	0.0314893	2_0	Abca8b
2.35288e-06	1.5945	1	0.545	0.0330603	2_0	Lrrc17
2.40333e-06	2.61969	0.471	0.087	0.0337692	2_0	Col26a1
2.63075e-06	4.25841	0.412	0.076	0.0369646	2_0	Acvrl1
2.87685e-06	3.22161	0.706	0.22	0.0404226	2_0	Col15a1
2.89852e-06	0.907478	1	0.466	0.0407272	2_0	Tspan9
3.27744e-06	1.15921	1	0.996	0.0460513	2_0	Col1a1
3.5237e-06	0.702509	0.647	0.162	0.0495115	2_0	Pcsk6
3.78116e-06	4.69846	0.353	0.058	0.0531291	2_0	Svep1
3.95718e-06	5.63561	0.412	0.079	0.0556023	2_0	Enpp2
4.00068e-06	1.73549	0.882	0.347	0.0562135	2_0	Tmem107
4.00261e-06	1.72621	0.882	0.39	0.0562407	2_0	Matn2
4.18502e-06	2.31188	0.471	0.097	0.0588037	2_0	Col8a1
5.19952e-06	1.99923	0.647	0.181	0.0730585	2_0	Scara5
5.81873e-06	1.54672	0.471	0.101	0.081759	2_0	Frem1
6.01186e-06	2.71813	0.765	0.3	0.0844726	2_0	Spon2
6.19366e-06	3.94651	0.294	0.04	0.0870271	2_0	Gm166
6.39167e-06	1.92051	0.412	0.076	0.0898093	2_0	Txnrd3
6.80427e-06	1.74113	0.941	0.383	0.0956068	2_0	Serping1
6.83848e-06	1.48086	0.471	0.101	0.0960875	2_0	L3mbtl2
7.42618e-06	2.78659	0.588	0.181	0.104345	2_0	Cygb
7.46052e-06	3.12204	0.529	0.134	0.104828	2_0	Gm14005
7.91673e-06	2.59089	0.294	0.04	0.111238	2_0	Fxyd2
8.93217e-06	2.76229	0.294	0.04	0.125506	2_0	Steap4
1.0173e-05	1.99717	0.765	0.274	0.142941	2_0	Ecm2
1.1238e-05	2.83005	0.765	0.245	0.157905	2_0	Naga
1.18131e-05	1.65954	0.824	0.296	0.165985	2_0	Zfp592
1.18168e-05	1.40253	0.647	0.206	0.166038	2_0	Tmem194
1.20321e-05	6.133	0.471	0.116	0.169062	2_0	Mmaa
1.21675e-05	1.58237	0.941	0.516	0.170965	2_0	Col4a2
1.26402e-05	1.04141	1	0.787	0.177608	2_0	Crip1
1.35316e-05	3.99516	0.588	0.181	0.190133	2_0	Ccdc3
1.37045e-05	1.43505	1	0.964	0.192562	2_0	Ifitm2
1.37094e-05	0.967516	1	0.993	0.192631	2_0	S100a11
1.39385e-05	0.433204	0.412	0.083	0.19585	2_0	Jph2
1.48678e-05	2.749	0.294	0.043	0.208907	2_0	Serpina3h
1.52165e-05	0.792224	0.824	0.325	0.213808	2_0	Nov
1.63754e-05	1.95558	1	0.661	0.23009	2_0	Gsn
1.76184e-05	1.60595	0.353	0.065	0.247556	2_0	Shtn1
1.92522e-05	2.23571	0.588	0.155	0.270513	2_0	Grp
1.95526e-05	1.78336	0.647	0.206	0.274734	2_0	5730409E04Rik
2.10363e-05	1.56655	0.765	0.278	0.295581	2_0	Mospd3
2.15183e-05	1.73427	1	0.69	0.302353	2_0	Dcn
2.74258e-05	1.40038	0.706	0.292	0.38536	2_0	Stc1
3.33695e-05	1.18332	1	0.498	0.468875	2_0	Thbs2
3.54972e-05	0.738695	0.765	0.278	0.498772	2_0	Srpx
4.0001e-05	1.77205	0.647	0.217	0.562054	2_0	Srpx2
4.18331e-05	1.12217	1	0.993	0.587797	2_0	Postn
4.20344e-05	1.51197	0.882	0.433	0.590626	2_0	Sulf1
4.35056e-05	1.62321	0.647	0.22	0.611297	2_0	Gucy1a2
4.35468e-05	1.9532	0.706	0.253	0.611876	2_0	Atp8b1
4.49559e-05	2.265	1	0.671	0.631676	2_0	Fabp5
4.54759e-05	1.43071	0.765	0.245	0.638981	2_0	Palm2
4.61328e-05	2.22645	0.647	0.235	0.648212	2_0	Mfap5
4.68334e-05	0.528156	0.706	0.224	0.658056	2_0	Hdac8
4.8395e-05	0.785106	0.882	0.361	0.679998	2_0	Klf2
5.07471e-05	1.80916	0.941	0.581	0.713048	2_0	Dpm3
5.13485e-05	1.05794	0.353	0.069	0.721497	2_0	Acss2
5.24501e-05	2.07881	0.882	0.563	0.736977	2_0	Slc16a2
5.24954e-05	2.05641	0.882	0.357	0.737612	2_0	Megf6
5.42015e-05	1.38886	0.882	0.415	0.761585	2_0	Islr
5.46002e-05	2.04914	0.941	0.574	0.767187	2_0	Itpripl2
5.60953e-05	1.19821	1	0.534	0.788196	2_0	Itih5
5.99363e-05	1.67971	0.706	0.245	0.842165	2_0	C1qtnf2
6.3298e-05	2.75886	0.294	0.051	0.8894	2_0	Gm16062
6.3773e-05	1.52672	1	0.653	0.896074	2_0	Col4a1
6.53283e-05	0.830429	0.647	0.22	0.917928	2_0	Adamts17
6.80157e-05	3.0452	0.882	0.404	0.955689	2_0	Gpr153
7.03132e-05	1.88585	0.471	0.123	0.987971	2_0	Rab26os
7.05548e-05	1.44759	1	0.722	0.991366	2_0	Psenen
7.14839e-05	2.03407	0.706	0.303	1	2_0	Gpsm2
7.42839e-05	2.14597	0.529	0.166	1	2_0	Ccdc163
7.84347e-05	0.542724	0.471	0.123	1	2_0	Cd74
8.54523e-05	2.98503	0.471	0.123	1	2_0	Pcdhb16
8.58747e-05	1.79353	0.765	0.339	1	2_0	Gucy1a3
9.10873e-05	2.69587	0.353	0.076	1	2_0	4930506C21Rik
9.24526e-05	0.613186	0.588	0.184	1	2_0	Cacna1d
9.3032e-05	2.98961	0.471	0.134	1	2_0	Ell
9.65959e-05	1.42588	0.647	0.22	1	2_0	Htra3
0.000100984	1.40669	0.882	0.419	1	2_0	Cdkn2aipnl
0.000102494	1.4931	0.765	0.325	1	2_0	S100a16
0.000105221	1.30362	0.824	0.394	1	2_0	Stxbp6
0.000105639	1.59554	0.941	0.588	1	2_0	Aspn
0.000105641	0.713973	0.824	0.318	1	2_0	Ehd2
0.000109263	1.96371	0.412	0.097	1	2_0	Urb2
0.000110478	1.27911	0.588	0.195	1	2_0	Mettl8
0.000112016	3.9471	0.471	0.13	1	2_0	Adrb1
0.00011381	1.37746	1	0.989	1	2_0	Rpl23a
0.000119228	2.71344	0.471	0.126	1	2_0	Aldh1a3
0.000127971	0.749134	0.941	0.426	1	2_0	Atp11a
0.000128282	2.51752	0.588	0.202	1	2_0	Abcc9
0.000128531	2.26392	1	0.852	1	2_0	Ndufb11
0.000130488	1.06956	0.529	0.155	1	2_0	Zfand4
0.000134003	0.443168	0.471	0.119	1	2_0	Tmem143
0.000136448	0.714631	0.941	0.375	1	2_0	Slc29a1
0.000138155	1.70235	0.294	0.054	1	2_0	Snord99
0.000141117	0.897604	0.647	0.227	1	2_0	2022-09-04
0.000154235	0.616124	0.882	0.426	1	2_0	Clca3a2
0.000156234	2.67816	0.412	0.101	1	2_0	Pla2g6
0.000160342	2.05582	0.647	0.242	1	2_0	G0s2
0.000164852	0.520854	0.824	0.314	1	2_0	Prelp
0.000171488	0.722371	1	1	1	2_0	Rps29
0.000179405	0.345992	0.353	0.079	1	2_0	Tnfrsf26
0.000182608	1.83532	0.647	0.256	1	2_0	Cdc42ep2
0.000183084	0.443189	0.824	0.361	1	2_0	Kat2b
0.000187011	1.67723	0.294	0.058	1	2_0	Xkr8
0.000189097	1.3801	0.941	0.585	1	2_0	Mest
0.000196415	2.81992	0.412	0.112	1	2_0	Klhl18
0.00020161	1.05267	0.824	0.325	1	2_0	Gins2
0.000202582	1.21409	0.824	0.354	1	2_0	Ccdc86
0.000203377	1.71593	1	0.773	1	2_0	Ifitm3
0.000215441	1.47124	0.941	0.563	1	2_0	Akap12
0.00021576	2.38495	0.294	0.058	1	2_0	Myzap
0.000219878	1.62037	0.529	0.159	1	2_0	Tatdn3
0.000220627	2.23926	0.765	0.339	1	2_0	Plcd1
0.000221224	0.378143	0.294	0.054	1	2_0	Mapk11
0.000225509	0.97545	1	1	1	2_0	Col3a1
0.000227356	2.61733	0.294	0.058	1	2_0	Rasl12
0.000230188	3.01879	0.412	0.112	1	2_0	Sh3bp4
0.000230228	3.15026	0.412	0.112	1	2_0	Mief2
0.000233252	2.68265	0.294	0.058	1	2_0	Synm
0.000233966	1.20723	0.353	0.079	1	2_0	Tslp
0.00024081	2.09931	0.588	0.227	1	2_0	Eps8
0.000245167	1.4931	0.294	0.058	1	2_0	Lacc1
0.000250685	0.769981	1	0.473	1	2_0	Emp2
0.000269119	1.12031	0.941	0.625	1	2_0	Crip2
0.00027014	0.691638	0.765	0.292	1	2_0	Spryd4
0.000270616	1.49661	0.529	0.17	1	2_0	Ptger4
0.0002764	1.89609	0.765	0.347	1	2_0	Rem1
0.000302873	2.93902	0.471	0.144	1	2_0	Kcnj8
0.000303908	1.00337	0.706	0.271	1	2_0	Cox18
0.000318834	0.764552	0.882	0.401	1	2_0	Hs2st1
0.000323311	1.8569	0.353	0.083	1	2_0	Exog
0.000327797	2.12541	0.412	0.116	1	2_0	Ndc1
0.000328758	1.1768	0.941	0.502	1	2_0	B4galt1
0.000330692	1.66722	0.824	0.347	1	2_0	Iffo2
0.000333897	0.633232	0.824	0.412	1	2_0	1700025G04Rik
0.000334386	0.312926	0.471	0.13	1	2_0	1700123M08Rik
0.000338027	0.763878	0.471	0.134	1	2_0	Vps13c
0.000340216	1.14678	1	0.69	1	2_0	Vkorc1
0.000347844	1.07017	1	0.635	1	2_0	Snhg18
0.000355135	0.919533	0.294	0.058	1	2_0	Bst2
0.0003574	1.16777	0.294	0.061	1	2_0	Abca6
0.000363547	1.50183	0.706	0.3	1	2_0	Vstm4
0.000373927	1.88555	0.588	0.242	1	2_0	Elmsan1
0.000380261	0.753448	0.765	0.354	1	2_0	Zfp799
0.000386571	0.621873	0.529	0.162	1	2_0	Hinfp
0.000386876	1.26885	0.529	0.184	1	2_0	Serpina3n
0.000388899	0.87523	1	1	1	2_0	Col1a2
0.000390701	0.685312	0.647	0.249	1	2_0	Lipt2
0.000394762	2.1776	0.588	0.213	1	2_0	Arsj
0.000403108	2.18043	0.941	0.61	1	2_0	Tcf21
0.0004114	1.73703	0.412	0.108	1	2_0	Arrb1
0.000418425	0.88099	0.412	0.105	1	2_0	Plxnc1
0.000421499	2.73051	0.647	0.256	1	2_0	Rab23
0.000431447	0.266443	0.471	0.137	1	2_0	Prodh
0.000432034	2.52374	0.765	0.336	1	2_0	Rasa3
0.000436679	0.548108	0.412	0.112	1	2_0	Coro2b
0.000439229	1.34906	0.471	0.148	1	2_0	Gm9079
0.000447931	1.10956	0.824	0.444	1	2_0	Cntln
0.00045405	2.18944	0.353	0.087	1	2_0	Saxo2
0.000456711	1.32077	0.529	0.166	1	2_0	Kdm8
0.000465672	1.21404	0.529	0.173	1	2_0	Thrb
0.000467705	1.53068	0.588	0.209	1	2_0	Lin54
0.000470241	1.30346	0.765	0.318	1	2_0	Ccdc186
0.000479119	0.637088	0.471	0.141	1	2_0	Chdh
0.000494314	0.935394	0.412	0.108	1	2_0	Pag1
0.000499163	3.03726	1	0.69	1	2_0	Copz2
0.000506712	1.85506	0.941	0.563	1	2_0	Isca1
0.000513647	1.5097	0.882	0.48	1	2_0	Slc8a1
0.000517166	1.71869	0.294	0.065	1	2_0	Klf15
0.000518192	1.40504	0.706	0.332	1	2_0	Gm10653
0.000520378	1.53294	1	0.838	1	2_0	S100a10
0.000523509	0.813686	0.941	0.48	1	2_0	Man2a1
0.000525241	0.399874	0.529	0.177	1	2_0	F3
0.000541646	1.04903	0.765	0.35	1	2_0	Tmem219
0.000544481	0.745478	1	1	1	2_0	Lgals1
0.000547012	1.14103	0.647	0.245	1	2_0	Dpep1
0.000557715	0.749133	0.765	0.336	1	2_0	Atp6v0a2
0.000565028	1.805	0.529	0.181	1	2_0	Hdhd3
0.000585472	0.503026	0.353	0.087	1	2_0	Lrrc32
0.00060176	2.84883	0.471	0.159	1	2_0	Glt8d2
0.000603637	1.47664	0.529	0.202	1	2_0	Sele
0.000607504	1.09977	1	0.877	1	2_0	Nid1
0.000629052	1.37271	0.529	0.17	1	2_0	Elmo1
0.000632213	1.2801	0.824	0.386	1	2_0	Anxa1
0.000644646	1.74791	0.941	0.646	1	2_0	Col6a1
0.000660261	0.768866	0.353	0.083	1	2_0	Galns
0.000669857	0.908741	1	0.91	1	2_0	B2m
0.000670803	0.989677	1	0.505	1	2_0	Lgmn
0.000674603	1.01002	0.588	0.231	1	2_0	Angpt2
0.000684768	2.21008	0.412	0.126	1	2_0	Ppp1r3c
0.000686727	1.08396	0.529	0.177	1	2_0	Zfa-ps
0.000687754	1.29598	0.529	0.181	1	2_0	Jade3
0.000697145	0.76552	1	0.805	1	2_0	Ptrf
0.000718933	3.46695	0.588	0.238	1	2_0	Triqk
0.000719011	1.46778	0.824	0.39	1	2_0	Gli2
0.000762042	1.49797	0.824	0.469	1	2_0	Clca3a1
0.000763417	1.99966	0.765	0.347	1	2_0	Kbtbd3
0.000772005	0.793682	0.941	0.711	1	2_0	Trio
0.0007727	0.668925	1	0.982	1	2_0	Rpl12
0.000776918	0.511098	1	1	1	2_0	Rps25
0.000784683	0.859482	1	0.87	1	2_0	Sh3bgrl3
0.000797523	1.12098	0.412	0.119	1	2_0	Fbxo6
0.000812038	2.73096	0.294	0.065	1	2_0	Tcaim
0.00082043	0.983103	0.765	0.343	1	2_0	Ncaph
0.000826572	3.0807	0.706	0.307	1	2_0	Nbas
0.000832969	0.372218	0.941	0.542	1	2_0	Cyth3
0.00083614	1.44559	0.765	0.357	1	2_0	Rwdd4a
0.000838156	1.47938	0.294	0.069	1	2_0	1700003F12Rik
0.000839331	1.73294	0.471	0.152	1	2_0	Tmem100
0.000842566	3.04556	0.412	0.123	1	2_0	Anpep
0.000848444	1.74794	0.412	0.119	1	2_0	Chn2
0.000849018	1.0338	0.588	0.209	1	2_0	Mto1
0.000856267	1.23361	0.706	0.314	1	2_0	Pgs1
0.000865654	1.49859	1	0.69	1	2_0	Pcolce
0.000870582	1.1206	1	0.718	1	2_0	Pmp22
0.000900028	1.02693	0.353	0.094	1	2_0	Osr2
0.000906224	0.603309	0.882	0.487	1	2_0	Slc35a1
0.00091194	3.92569	0.471	0.155	1	2_0	6030408B16Rik
0.000922826	1.99068	0.941	0.516	1	2_0	Mki67
0.000926691	1.61255	0.529	0.184	1	2_0	Fam129a
0.000938333	1.64333	0.353	0.09	1	2_0	BC030867
0.000951837	0.807449	1	0.697	1	2_0	Col6a3
0.000966915	0.831721	0.353	0.094	1	2_0	Znf41-ps
0.000976557	3.1488	0.471	0.152	1	2_0	Ifitm1
0.000995985	1.75458	0.647	0.271	1	2_0	Ndufa4l2
0.0010419	0.693955	0.882	0.513	1	2_0	Mmp16
0.00104613	1.08106	0.824	0.455	1	2_0	Gm20594
0.00105894	1.07803	0.765	0.339	1	2_0	Mettl17
0.00106054	1.22417	0.529	0.195	1	2_0	Dgkg
0.00106773	1.58227	0.647	0.249	1	2_0	Magee1
0.00107537	0.843058	0.353	0.09	1	2_0	Rmst
0.0010867	0.606041	0.882	0.404	1	2_0	Rap2a
0.00108941	0.391761	0.471	0.152	1	2_0	Hist2h2ab
0.00109662	1.57456	0.765	0.361	1	2_0	Rnase4
0.00111053	0.374339	0.824	0.368	1	2_0	Stk11
0.00111693	2.26705	0.647	0.307	1	2_0	Adamtsl5
0.00112068	1.03351	0.471	0.148	1	2_0	Mtmr1
0.00112659	1.41934	0.647	0.31	1	2_0	Armcx6
0.00112917	1.51731	0.353	0.09	1	2_0	Steap1
0.00113918	0.769732	0.588	0.206	1	2_0	Gna12
0.00114179	0.853005	0.647	0.249	1	2_0	Meis3
0.00114249	2.50467	0.294	0.069	1	2_0	Xrcc3
0.00114644	1.06595	0.706	0.336	1	2_0	Snhg9
0.00115723	1.00252	1	0.975	1	2_0	Ptn
0.00115875	2.61469	0.412	0.137	1	2_0	Tmem41a
0.00117137	1.10618	0.412	0.119	1	2_0	Synj2
0.00117271	0.532675	1	0.487	1	2_0	Ctdspl
0.0011737	0.576246	0.412	0.123	1	2_0	Trp63
0.00119915	0.473938	0.412	0.13	1	2_0	E030003E18Rik
0.00120349	1.6567	0.412	0.123	1	2_0	Fam196a
0.00120585	0.80512	0.647	0.296	1	2_0	Ogn
0.00123925	1.76641	0.471	0.152	1	2_0	Serpinb1a
0.00124133	0.788034	0.882	0.462	1	2_0	1810055G02Rik
0.00124245	2.18776	0.412	0.126	1	2_0	Col24a1
0.00126321	1.15089	0.529	0.177	1	2_0	Igtp
0.00126501	2.03672	0.529	0.195	1	2_0	Heg1
0.00127332	1.08627	0.765	0.444	1	2_0	Tnfrsf1a
0.00127541	0.716046	1	0.722	1	2_0	Fhl1
0.00127971	1.3039	0.647	0.271	1	2_0	Rilpl1
0.00128243	0.53788	0.529	0.195	1	2_0	Heatr5b
0.00129425	1.65998	0.294	0.072	1	2_0	Tnxb
0.00129429	2.75122	0.941	0.581	1	2_0	Tfdp1
0.00129483	1.52745	0.294	0.072	1	2_0	Gnb1l
0.0012983	1.62225	0.529	0.199	1	2_0	Slc22a5
0.0013036	1.10626	0.824	0.404	1	2_0	Arl6ip5
0.00130657	0.290021	1	0.477	1	2_0	Sgcb
0.00131262	2.3361	0.294	0.069	1	2_0	Mpzl2
0.0013164	1.43147	0.353	0.097	1	2_0	Fancc
0.00132289	2.72149	0.294	0.072	1	2_0	Gm4532
0.00133111	1.84408	0.412	0.123	1	2_0	Catsper2
0.00135168	0.399781	0.706	0.289	1	2_0	Dcaf4
0.00137207	0.540342	0.941	0.473	1	2_0	Vma21
0.00137282	1.55935	0.294	0.069	1	2_0	Ces2g
0.00137423	0.353505	0.529	0.188	1	2_0	Clca4b
0.00137664	0.999404	0.706	0.35	1	2_0	Hist1h1c
0.00139304	1.53582	0.765	0.365	1	2_0	Heyl
0.00139699	0.502924	0.765	0.365	1	2_0	Gtf2h3
0.0013985	1.55591	0.765	0.394	1	2_0	Mrpl47
0.00140092	1.45963	0.353	0.097	1	2_0	9330188P03Rik
0.00141769	2.08829	0.353	0.097	1	2_0	Bmx
0.00142403	2.48861	0.294	0.072	1	2_0	Zfp811
0.00143755	0.363659	0.353	0.094	1	2_0	Fam181b
0.0014646	0.628089	0.882	0.426	1	2_0	Dpy19l1
0.00148082	1.30149	1	0.827	1	2_0	Kdelr1
0.00148632	1.44859	0.765	0.329	1	2_0	Kif15
0.00149012	2.07022	0.412	0.13	1	2_0	Sgsm1
0.00149567	0.693323	0.471	0.152	1	2_0	D2hgdh
0.00150864	3.13137	0.353	0.101	1	2_0	Ttc21b
0.00151199	0.320847	0.706	0.285	1	2_0	Cyp20a1
0.00154484	1.98552	0.412	0.134	1	2_0	Gk5
0.00154604	0.853691	0.647	0.26	1	2_0	Aurka
0.00158158	3.54129	0.294	0.072	1	2_0	Kif14
0.00160851	0.541348	0.647	0.267	1	2_0	Igsf10
0.00162237	0.742298	0.765	0.354	1	2_0	Trim47
0.00162663	2.47382	0.765	0.365	1	2_0	Fam111a
0.00162905	0.753802	0.529	0.188	1	2_0	Gm13375
0.00165151	0.453549	0.471	0.159	1	2_0	Ggta1
0.00166827	1.34788	1	0.718	1	2_0	Ergic3
0.00167158	1.50496	0.882	0.534	1	2_0	Sdpr
0.00170063	1.23822	0.824	0.487	1	2_0	Yae1d1
0.00171378	0.899515	0.647	0.26	1	2_0	H2-Ke6
0.00171625	2.28312	0.412	0.141	1	2_0	Rcl1
0.00172174	0.488012	0.941	0.516	1	2_0	Yipf3
0.00172533	1.44354	0.471	0.155	1	2_0	Pramef8
0.00173174	1.74734	0.941	0.664	1	2_0	Dnpep
0.00173623	0.292453	0.353	0.097	1	2_0	Mtcl1
0.00175896	0.49961	0.412	0.134	1	2_0	Mirg
0.00176009	0.91106	0.471	0.159	1	2_0	Spink2
0.00177103	1.1393	1	0.733	1	2_0	Cyb5a
0.00177433	1.74574	0.647	0.296	1	2_0	Abcf3
0.00179122	0.710101	0.765	0.368	1	2_0	Diap2
0.00180598	0.938233	1	0.798	1	2_0	Emp3
0.00180978	1.15209	0.294	0.072	1	2_0	Fbxo36
0.00182218	1.53764	0.353	0.101	1	2_0	Nhlrc3
0.00182777	2.39246	0.471	0.162	1	2_0	Slc25a33
0.00185733	1.46425	1	0.91	1	2_0	Itm2a
0.0018921	0.707056	1	0.982	1	2_0	Rps2
0.00189598	1.36954	0.765	0.394	1	2_0	Fer
0.00189742	0.435121	0.765	0.383	1	2_0	Pkdcc
0.00190765	2.52378	0.529	0.227	1	2_0	Aldh1a1
0.00192375	0.759433	0.882	0.513	1	2_0	Col14a1
0.00192629	0.932176	0.529	0.195	1	2_0	Mob3b
0.00194264	2.12662	0.412	0.13	1	2_0	Apobr
0.00195908	0.650022	1	0.993	1	2_0	Rps23
0.00200342	1.41945	0.471	0.162	1	2_0	Foxs1
0.00201407	0.835845	0.706	0.318	1	2_0	Metap1
0.00202224	1.61037	0.412	0.137	1	2_0	Selenbp2
0.00202453	0.35362	0.353	0.097	1	2_0	Ust
0.0020482	2.26245	0.294	0.076	1	2_0	Mtm1
0.00206006	2.15201	0.412	0.152	1	2_0	Snhg7
0.00206868	0.501542	1	1	1	2_0	Rpl13
0.00208158	0.486903	0.765	0.314	1	2_0	Smap2
0.00208624	2.02219	0.588	0.271	1	2_0	Ebp
0.00209809	1.02481	0.824	0.477	1	2_0	Nucb2
0.00210257	1.94538	0.412	0.141	1	2_0	Kcne4
0.00212147	0.982542	0.706	0.318	1	2_0	Cln5
0.00212771	0.431585	0.941	0.556	1	2_0	Zfx
0.00213501	2.37279	0.529	0.22	1	2_0	Dkk2
0.00218693	1.48773	0.765	0.375	1	2_0	Cnpy3
0.0021957	1.44904	0.294	0.072	1	2_0	Rgs6
0.00226833	0.811977	0.294	0.076	1	2_0	Myo19
0.00227604	0.968693	1	0.841	1	2_0	Manf
0.00232335	2.57759	0.412	0.134	1	2_0	Cep76
0.00232908	1.42791	0.824	0.477	1	2_0	Fam172a
0.00233227	1.95348	0.588	0.271	1	2_0	Lpl
0.00235284	2.30056	0.471	0.17	1	2_0	Tfpi
0.00235534	0.832664	0.941	0.617	1	2_0	Angptl2
0.00237224	1.83001	0.294	0.079	1	2_0	Sipa1l3
0.00237437	1.64364	0.588	0.238	1	2_0	Evc2
0.00237676	0.834063	1	0.621	1	2_0	Crtap
0.00242049	0.600283	0.882	0.458	1	2_0	Abhd11
0.00242243	1.05502	1	0.603	1	2_0	Mxra8
0.00243271	0.659393	0.882	0.466	1	2_0	Ucp2
0.0024347	0.371626	0.412	0.134	1	2_0	Tango6
0.00244775	1.83922	0.941	0.527	1	2_0	Cdk14
0.00247112	0.838264	0.588	0.245	1	2_0	9130401M01Rik
0.00247956	0.516444	1	1	1	2_0	Rps9
0.00249362	1.89449	0.412	0.137	1	2_0	Armc7
0.00249989	0.9374	0.529	0.202	1	2_0	Neil3
0.00250378	0.566628	1	1	1	2_0	Rpl13a
0.00250644	0.592592	0.824	0.394	1	2_0	Gm3435
0.00251337	0.684326	1	0.773	1	2_0	Ralbp1
0.00252924	1.9798	0.294	0.076	1	2_0	Cml1
0.00253423	0.656485	0.471	0.159	1	2_0	Fzd5
0.00254265	2.47258	0.588	0.249	1	2_0	Epg5
0.00255166	1.59439	0.353	0.108	1	2_0	Rpia
0.00256591	1.72562	0.706	0.332	1	2_0	C77370
0.00257471	2.06281	0.353	0.101	1	2_0	Adnp2
0.00260316	0.787126	0.765	0.343	1	2_0	Rfc5
0.00260526	0.820756	0.882	0.57	1	2_0	Lsp1
0.00264216	1.21748	0.471	0.177	1	2_0	Tfap4
0.00267543	0.732354	0.353	0.105	1	2_0	Agtr2
0.00267704	1.40614	1	0.693	1	2_0	Axl
0.00268284	0.272988	0.294	0.076	1	2_0	Cobll1
0.00274497	0.423907	0.824	0.43	1	2_0	Pla2g12a
0.00276399	1.20125	0.941	0.682	1	2_0	Tram1
0.0027726	2.38762	0.412	0.148	1	2_0	Snhg4
0.00277723	0.745068	0.529	0.202	1	2_0	Oip5
0.00281148	0.328567	0.647	0.274	1	2_0	Recql
0.00281424	0.416698	0.882	0.451	1	2_0	Malsu1
0.00281561	0.96007	0.941	0.639	1	2_0	Acat1
0.00282525	1.5373	0.647	0.314	1	2_0	Nrm
0.00284054	0.390015	0.706	0.289	1	2_0	Mthfd2
0.0028548	0.468965	0.706	0.314	1	2_0	Cercam
0.00287211	0.734883	0.765	0.368	1	2_0	Fam174a
0.00287699	2.20338	0.294	0.079	1	2_0	Mettl13
0.00289111	2.35389	0.647	0.31	1	2_0	Kazald1
0.0028936	0.946637	0.706	0.354	1	2_0	Ifi27
0.00292245	0.800606	0.471	0.162	1	2_0	Bmp5
0.00292593	1.37736	0.647	0.339	1	2_0	Pnp2
0.00293397	1.26267	0.706	0.357	1	2_0	Sema5a
0.00293882	1.41559	0.588	0.253	1	2_0	Uevld
0.0029579	1.43866	0.294	0.076	1	2_0	Tmem231
0.00297263	1.19749	0.471	0.166	1	2_0	Tspan5
0.00298879	0.783272	0.824	0.444	1	2_0	Cdc42ep5
0.00299067	0.50337	0.882	0.43	1	2_0	Adgre5
0.0030029	2.22259	0.353	0.112	1	2_0	Gm6642
0.00300961	0.586308	0.765	0.357	1	2_0	Uxt
0.00301321	0.699605	0.706	0.336	1	2_0	Ndc80
0.00306403	1.2597	0.765	0.401	1	2_0	Pprc1
0.00309802	2.04638	0.588	0.282	1	2_0	Sdf2l1
0.00311194	1.45182	0.824	0.527	1	2_0	Mycbp
0.00314028	1.30419	0.765	0.422	1	2_0	Blvrb
0.00317006	2.30758	0.529	0.209	1	2_0	Birc3
0.00317627	1.18096	0.765	0.448	1	2_0	Rnaseh2a
0.00320409	0.488817	0.706	0.318	1	2_0	Ccdc9
0.00320939	2.00374	0.824	0.477	1	2_0	Nab1
0.00322997	0.991973	0.882	0.505	1	2_0	Mrpl36
0.00323252	1.11113	0.882	0.574	1	2_0	Mrpl2
0.00326953	1.66001	0.471	0.191	1	2_0	Pcdhb17
0.00327319	0.413313	0.882	0.484	1	2_0	Ppil1
0.00329746	0.67019	0.588	0.231	1	2_0	Osr1
0.0033046	0.558411	0.471	0.166	1	2_0	Slc10a7
0.00334773	0.506023	0.471	0.17	1	2_0	Gm3893
0.00335215	0.966644	0.294	0.079	1	2_0	Ajap1
0.00335298	0.554351	0.294	0.076	1	2_0	Cdk20
0.00336306	1.10581	0.353	0.108	1	2_0	Ccdc166
0.00336902	0.872488	0.941	0.592	1	2_0	Emp1
0.00342944	1.24009	0.824	0.509	1	2_0	Mapre2
0.0034433	1.33789	0.471	0.181	1	2_0	Chchd6
0.0034488	1.13384	0.824	0.473	1	2_0	Mien1
0.00345802	3.00299	0.647	0.274	1	2_0	Sdhaf3
0.0034634	0.909131	0.765	0.365	1	2_0	Nt5c3
0.00348762	4.3004	0.353	0.116	1	2_0	Hlf
0.00350785	1.59101	0.765	0.509	1	2_0	Nkain4
0.00351756	0.590673	0.882	0.401	1	2_0	Cmc2
0.00352506	0.797482	0.824	0.444	1	2_0	Smim4
0.00353221	1.23116	1	0.892	1	2_0	Ltbp4
0.00354467	0.862533	0.353	0.105	1	2_0	9530091C08Rik
0.00356265	2.29436	0.529	0.195	1	2_0	Evc
0.00357917	1.4075	0.529	0.217	1	2_0	Rgs10
0.00360362	0.807511	0.353	0.105	1	2_0	Ston1
0.00360817	1.9259	0.353	0.112	1	2_0	Arhgap26
0.00361262	0.935591	0.706	0.314	1	2_0	Kif2c
0.0036282	1.84001	0.588	0.256	1	2_0	Pdzd2
0.00366911	0.998856	1	0.895	1	2_0	Igfbp4
0.00368834	0.81046	0.353	0.108	1	2_0	Snora68
0.00370896	2.27764	0.353	0.116	1	2_0	Fam20a
0.00375353	0.957567	0.294	0.079	1	2_0	Lgi2
0.00378476	1.76477	0.765	0.448	1	2_0	Gpaa1
0.00382157	0.381828	0.353	0.105	1	2_0	Nudt6
0.00383142	0.955072	0.294	0.083	1	2_0	Rprl3
0.00383559	1.67704	0.647	0.325	1	2_0	Tcta
0.00387621	0.704174	0.353	0.108	1	2_0	Man1a
0.00390897	1.11145	0.882	0.664	1	2_0	Rhoj
0.00396388	1.4674	0.706	0.321	1	2_0	Abhd14a
0.00397047	1.43919	0.294	0.083	1	2_0	Mir6385
0.00398706	1.42342	0.706	0.347	1	2_0	Gstm1
0.00402334	1.86446	0.412	0.148	1	2_0	A230050P20Rik
0.00404717	0.603441	1	0.989	1	2_0	Rpl18
0.00407202	0.746044	0.824	0.397	1	2_0	Commd9
0.00409586	2.5219	0.529	0.209	1	2_0	Mvk
0.00410596	1.09938	0.941	0.578	1	2_0	Gm14403
0.00415202	0.939382	0.882	0.531	1	2_0	Notch3
0.00417572	0.64785	1	0.542	1	2_0	Chpf
0.00419634	0.963431	0.941	0.596	1	2_0	Klhdc3
0.00423472	0.898404	0.824	0.394	1	2_0	Slc35f5
0.00425824	1.71598	0.882	0.538	1	2_0	Aebp1
0.00430427	0.440856	0.588	0.245	1	2_0	1810032O08Rik
0.0043346	0.840384	0.882	0.491	1	2_0	Acaa2
0.00436261	1.73823	0.471	0.199	1	2_0	Sclt1
0.0043861	1.44323	0.765	0.401	1	2_0	Kctd17
0.00439297	0.966025	0.588	0.26	1	2_0	Acbd4
0.00440976	0.958147	1	0.708	1	2_0	Cmtm3
0.0044999	0.691095	0.412	0.144	1	2_0	Zfp446
0.00453676	0.254085	0.824	0.412	1	2_0	Ino80
0.00458692	0.600082	0.588	0.274	1	2_0	Nol9
0.0046138	4.53289	0.294	0.087	1	2_0	6030443J06Rik
0.00462815	0.545853	1	1	1	2_0	Rpl4
0.00464081	0.571318	0.529	0.209	1	2_0	Tgfbr3
0.0046629	0.660147	0.882	0.509	1	2_0	Adk
0.00468782	2.30029	0.294	0.079	1	2_0	Fggy
0.00471393	0.655507	1	1	1	2_0	Serf2
0.00475696	0.90278	0.882	0.484	1	2_0	Ifnar2
0.00475735	0.493674	1	1	1	2_0	Rps19
0.00477876	0.866522	1	0.982	1	2_0	Rrbp1
0.0048728	0.896166	0.471	0.195	1	2_0	Zbtb6
0.00490394	0.356869	0.882	0.527	1	2_0	Foxo1
0.00492594	1.20402	0.588	0.245	1	2_0	Atg2a
0.00501115	2.20976	0.294	0.087	1	2_0	Bbs1
0.00501982	0.733175	1	0.935	1	2_0	Arhgdia
0.00503293	1.08026	1	0.7	1	2_0	Ugp2
0.00509267	1.30958	0.765	0.386	1	2_0	Itgb1bp1
0.00512315	0.930474	0.294	0.083	1	2_0	Hist2h4
0.00513657	1.69763	0.353	0.116	1	2_0	Pir
0.0051509	1.31205	0.824	0.462	1	2_0	Ankrd13a
0.00516583	1.77296	0.529	0.26	1	2_0	Rfng
0.00522571	2.2889	0.412	0.155	1	2_0	Rpp25
0.00524049	0.592568	0.882	0.448	1	2_0	Slc43a3
0.00524727	0.830153	0.529	0.227	1	2_0	Hist2h2ac
0.00526338	1.26517	0.765	0.458	1	2_0	Hn1l
0.00528353	0.598253	1	1	1	2_0	Rps5
0.00529366	1.26568	0.353	0.116	1	2_0	Ung
0.00532545	1.4262	0.529	0.224	1	2_0	Rbm15
0.00540581	2.916	0.353	0.116	1	2_0	Mr1
0.00543048	0.847773	0.529	0.217	1	2_0	Eepd1
0.00545374	0.525426	1	0.993	1	2_0	Gm5148
0.00546033	0.777634	0.588	0.231	1	2_0	Pard3b
0.00550807	0.60051	0.412	0.144	1	2_0	Klf9
0.0055528	0.682522	0.647	0.292	1	2_0	Nup107
0.00556837	0.552491	0.529	0.217	1	2_0	Zfp566
0.00560346	0.988627	0.294	0.083	1	2_0	Tyw3
0.00560377	0.534686	1	1	1	2_0	Sparc
0.00562569	2.96019	0.353	0.119	1	2_0	Arl14
0.00564266	0.765709	0.765	0.383	1	2_0	Psat1
0.00568339	0.295096	0.353	0.112	1	2_0	Tfpi2
0.0056986	0.828058	0.824	0.419	1	2_0	2700062C07Rik
0.00570214	0.441429	0.706	0.365	1	2_0	Egln3
0.00573576	0.915884	0.647	0.282	1	2_0	Prim2
0.00574081	1.44449	0.471	0.177	1	2_0	Socs1
0.00576693	0.424243	0.647	0.292	1	2_0	Jade1
0.00587959	0.559653	0.765	0.394	1	2_0	Svil
0.00588101	1.86131	0.529	0.217	1	2_0	Csf1
0.00593713	1.26687	1	0.971	1	2_0	Rps15a-ps4
0.00593995	0.290152	0.941	0.614	1	2_0	Adamts2
0.00597623	1.56774	0.706	0.347	1	2_0	Trip10
0.00603636	0.616327	0.588	0.238	1	2_0	Lzic
0.00608219	1.02727	0.588	0.267	1	2_0	Fars2
0.00616661	1.13892	0.882	0.592	1	2_0	Nrp1
0.00618132	0.716323	1	0.7	1	2_0	Lamc1
0.00618466	1.27552	0.353	0.116	1	2_0	Gin1
0.00624496	1.34248	0.765	0.437	1	2_0	4933409K07Rik
0.00624929	1.76205	0.471	0.195	1	2_0	Uaca
0.00628275	0.63383	0.412	0.155	1	2_0	Kctd9
0.00628625	2.31636	0.294	0.087	1	2_0	Cradd
0.0063112	0.943445	0.706	0.339	1	2_0	Parp8
0.00634756	0.85837	1	0.939	1	2_0	Lum
0.00637105	0.309245	0.353	0.108	1	2_0	Wnt5b
0.00640227	0.436244	0.412	0.148	1	2_0	Gcdh
0.00642762	0.439951	0.412	0.144	1	2_0	BC052688
0.00651459	0.650754	0.882	0.451	1	2_0	Sfxn1
0.00653114	1.5077	0.529	0.224	1	2_0	Pdpn
0.00653631	0.994181	0.706	0.372	1	2_0	Osbpl5
0.0065843	0.314941	0.941	0.556	1	2_0	Cflar
0.00660629	3.12706	0.412	0.148	1	2_0	Zfp558
0.00664192	0.654626	0.588	0.256	1	2_0	Gpr107
0.00667837	0.991286	0.706	0.365	1	2_0	1810030O07Rik
0.00668561	0.56667	0.941	0.614	1	2_0	Kcnq1ot1
0.00669142	1.00155	0.529	0.271	1	2_0	Has1
0.00671055	2.1135	0.294	0.09	1	2_0	Gpd1l
0.0067214	0.349969	0.706	0.336	1	2_0	Tfb2m
0.00675481	1.66936	0.588	0.289	1	2_0	Tmem115
0.00676909	2.6038	0.353	0.123	1	2_0	B3gnt8
0.00677461	0.502143	0.941	0.552	1	2_0	Add3
0.00679074	1.1231	0.647	0.31	1	2_0	Tpmt
0.00679108	1.31228	1	0.996	1	2_0	H19
0.00681993	1.08808	0.353	0.116	1	2_0	Arhgap20
0.00683963	1.35253	0.706	0.415	1	2_0	Timm10
0.00686164	1.41361	0.471	0.202	1	2_0	Wfdc18
0.00687972	0.586417	0.529	0.224	1	2_0	Cdc25b
0.00697314	0.829746	0.529	0.224	1	2_0	Chd3os
0.00706592	1.35071	1	0.845	1	2_0	Gm15421
0.0070981	0.417024	0.294	0.083	1	2_0	2610306M01Rik
0.00712991	1.07084	0.706	0.372	1	2_0	Itgb3bp
0.00714029	0.801599	0.529	0.227	1	2_0	Chac2
0.00724511	1.66765	0.824	0.451	1	2_0	Orc2
0.00728634	0.515209	0.706	0.35	1	2_0	Fbxo5
0.00736059	1.77295	0.294	0.09	1	2_0	Adamts14
0.00737135	0.559236	1	0.762	1	2_0	Nenf
0.00737852	0.803521	0.765	0.386	1	2_0	Pold2
0.00743168	0.410577	0.412	0.144	1	2_0	Setdb2
0.0074344	0.875463	0.353	0.126	1	2_0	Zfp575
0.00744935	1.36532	1	0.993	1	2_0	Igf2
0.0074668	0.669152	0.941	0.744	1	2_0	Tnfaip1
0.00752717	0.567533	0.824	0.383	1	2_0	Tmem237
0.00753913	1.04808	0.706	0.336	1	2_0	Rangrf
0.00756874	0.493874	1	0.531	1	2_0	Cops7a
0.00763627	1.21634	0.765	0.422	1	2_0	A430005L14Rik
0.00764219	2.16439	1	1	1	2_0	Rps19-ps3
0.00769789	1.222	0.882	0.635	1	2_0	Bicc1
0.00770267	0.445528	0.412	0.152	1	2_0	Ddx20
0.00793275	1.0301	1	0.682	1	2_0	Nrbp1
0.00796884	0.492442	0.765	0.404	1	2_0	Ly6e
0.00799731	1.34428	0.353	0.116	1	2_0	Gas2
0.00801483	1.58238	0.824	0.433	1	2_0	Vars
0.00805466	1.32836	0.824	0.603	1	2_0	Ufsp2
0.00805799	0.656501	1	0.989	1	2_0	Ywhab
0.00811633	0.997575	0.294	0.087	1	2_0	Lrrc51
0.00812437	1.11269	0.882	0.653	1	2_0	Tmem38b
0.00817636	0.851653	1	0.657	1	2_0	Fkbp7
0.00820653	1.0946	0.706	0.35	1	2_0	Chn1
0.00822513	0.622361	0.765	0.372	1	2_0	Fastk
0.00828669	0.620022	0.706	0.361	1	2_0	Il1r1
0.00829738	0.655805	0.824	0.404	1	2_0	Spata6
0.00830633	0.426517	1	0.993	1	2_0	Rps28
0.00833235	0.802875	0.824	0.527	1	2_0	Nelfe
0.00833564	1.68469	0.529	0.26	1	2_0	Cd59b
0.00833627	0.46526	0.941	0.549	1	2_0	Notch1
0.00834359	1.36858	0.647	0.394	1	2_0	Timm9
0.0083444	1.71209	0.412	0.166	1	2_0	Fkbp1b
0.00840493	0.548332	1	0.798	1	2_0	Clic4
0.00840645	2.06642	0.294	0.09	1	2_0	Nkain3
0.0084574	0.820482	0.706	0.375	1	2_0	Hist1h1e
0.00852549	0.438587	1	1	1	2_0	Rpl35
0.00853779	0.951994	1	0.87	1	2_0	H1f0
0.00855808	0.531952	1	0.755	1	2_0	Pam
0.00857686	2.18998	0.706	0.383	1	2_0	Styx
0.00862467	1.09188	0.647	0.307	1	2_0	Cep112
0.00863617	0.851284	0.882	0.635	1	2_0	Adprh
0.00865242	0.668013	0.647	0.321	1	2_0	Coprs
0.00868783	1.2424	0.294	0.09	1	2_0	5830415F09Rik
0.00873643	1.11761	0.647	0.339	1	2_0	1500011K16Rik
0.008813	1.40762	0.647	0.332	1	2_0	Mterf4
0.00886401	0.973927	0.706	0.404	1	2_0	Gas7
0.00895721	2.5485	0.294	0.094	1	2_0	Ero1lb
0.00904178	0.918873	0.882	0.65	1	2_0	Xist
0.00905577	0.489517	1	0.993	1	2_0	C330021F23Rik
0.00909607	0.528265	0.647	0.31	1	2_0	Cnrip1
0.00911215	0.588039	0.765	0.419	1	2_0	Cdc23
0.00920097	1.20529	0.353	0.123	1	2_0	Nabp1
0.00922521	0.844382	0.353	0.126	1	2_0	Peg12
0.00928662	0.686362	1	0.686	1	2_0	2610001J05Rik
0.00929132	0.746078	0.353	0.126	1	2_0	4933431E20Rik
0.00933213	1.54554	0.647	0.3	1	2_0	Gfpt2
0.00936225	0.322408	0.882	0.574	1	2_0	Rcsd1
0.00936366	0.466778	0.706	0.314	1	2_0	Olfml1
0.0093772	0.747351	0.882	0.549	1	2_0	Ola1
0.00942329	0.955341	0.765	0.48	1	2_0	Ccdc90b
0.00942368	0.711344	0.706	0.379	1	2_0	Hcfc2
0.00951809	0.845149	0.412	0.159	1	2_0	AY358078
0.00953352	0.563539	1	1	1	2_0	Rplp1
0.00955574	1.26096	0.294	0.094	1	2_0	Mss51
0.00957737	0.394011	0.529	0.213	1	2_0	Ccdc51
0.00958212	0.692052	0.647	0.307	1	2_0	Mtmr4
0.00964642	1.56264	0.412	0.17	1	2_0	Prlr
0.00966034	0.533678	0.588	0.26	1	2_0	Gdap2
0.00966764	1.16441	0.588	0.3	1	2_0	Cdr2l
0.00966875	0.301993	0.353	0.123	1	2_0	Xkr5
0.00969	0.577819	1	0.982	1	2_0	Gm6654
0.00969112	0.92523	0.765	0.433	1	2_0	Pyurf
0.00974521	1.62461	0.647	0.365	1	2_0	Plxna1
0.00978007	0.347105	0.941	0.563	1	2_0	Cd47
0.00980096	0.853007	0.412	0.159	1	2_0	Tesk2
0.0098237	1.474	0.647	0.386	1	2_0	Sntb2
0.00989416	1.20853	0.706	0.314	1	2_0	C330027C09Rik
0.00992079	2.35897	0.529	0.271	1	2_0	Sorcs2
0.00993302	0.415322	0.294	0.094	1	2_0	Gm6815
0.00993903	0.364946	1	0.859	1	2_0	Arl6ip1
0.00999232	1.44474	0.941	0.621	1	2_0	Ruvbl1
8.76218e-22	3.47682	0.857	0.068	1.23117e-17	2_1	Tmem158
9.42195e-17	4.41324	0.857	0.096	1.32388e-12	2_1	Sod3
4.96415e-14	4.97138	0.643	0.064	6.97512e-10	2_1	Lgi2
3.96748e-13	4.16419	1	0.271	5.57471e-09	2_1	Slit3
2.25303e-11	3.9702	1	0.282	3.16573e-07	2_1	Ogn
8.77293e-11	0.800877	0.357	0.021	1.23268e-06	2_1	Rac2
1.25687e-10	2.23447	0.357	0.021	1.76603e-06	2_1	Ksr1
1.49771e-10	3.51207	0.857	0.2	2.10443e-06	2_1	Ntrk3
3.97778e-10	4.82716	0.643	0.093	5.58917e-06	2_1	Adcy5
8.6729e-10	3.65038	0.286	0.014	1.21863e-05	2_1	Vit
1.288e-09	3.11949	0.786	0.164	1.80977e-05	2_1	Twist2
1.82514e-09	3.27885	1	0.996	2.56451e-05	2_1	Col1a1
2.057e-09	5.07745	0.571	0.086	2.89029e-05	2_1	Osr2
2.11137e-09	3.96182	1	0.325	2.96669e-05	2_1	Dlk1
2.46792e-09	4.60664	0.5	0.064	3.46768e-05	2_1	Tnxb
3.11258e-09	4.37996	0.786	0.218	4.37348e-05	2_1	Htra3
4.45105e-09	3.40302	1	0.511	6.25418e-05	2_1	Col14a1
5.14771e-09	3.20263	0.357	0.029	7.23304e-05	2_1	Hlx
5.59564e-09	3.30604	1	0.504	7.86244e-05	2_1	Thbs2
5.81467e-09	4.42822	0.5	0.068	8.17019e-05	2_1	Fgf18
7.73396e-09	5.08108	0.786	0.232	0.00010867	2_1	Mfap5
9.56325e-09	3.38336	0.786	0.189	0.000134373	2_1	Smoc2
1.19398e-08	3.23112	0.5	0.068	0.000167766	2_1	Tnfrsf11b
1.63616e-08	2.40332	0.714	0.168	0.000229896	2_1	Clca3b
1.83971e-08	2.56258	0.357	0.032	0.000258497	2_1	Colec10
1.90658e-08	4.64537	0.429	0.05	0.000267894	2_1	Zbtb16
1.94499e-08	2.79415	1	0.357	0.00027329	2_1	Socs3
2.27169e-08	4.07748	0.714	0.186	0.000319195	2_1	Col6a6
3.28388e-08	3.20676	0.643	0.132	0.000461418	2_1	Gas6
3.3216e-08	2.59804	1	0.425	0.000466718	2_1	Clca3a2
4.32884e-08	3.37455	0.786	0.239	0.000608245	2_1	Cdo1
8.80836e-08	3.06507	0.286	0.021	0.00123766	2_1	Chrd
9.16259e-08	1.74942	1	1	0.00128744	2_1	Sparc
9.23702e-08	3.01914	0.714	0.182	0.00129789	2_1	Heph
1.04717e-07	5.90533	0.357	0.039	0.00147138	2_1	Cdh12
1.10093e-07	4.57935	0.643	0.157	0.00154692	2_1	Fmo1
1.11345e-07	2.61012	1	1	0.0015645	2_1	Col1a2
1.25334e-07	3.11849	0.929	0.354	0.00176106	2_1	Dpt
1.31936e-07	4.38504	0.857	0.289	0.00185384	2_1	Pi15
1.54638e-07	3.0184	0.429	0.057	0.00217283	2_1	Lgals9
1.55175e-07	2.96392	0.643	0.136	0.00218036	2_1	Maf
2.07856e-07	4.89056	0.429	0.061	0.00292059	2_1	Tbxa2r
2.36659e-07	1.93713	0.786	0.204	0.00332529	2_1	Abca8a
2.72978e-07	3.28842	1	0.814	0.00383561	2_1	Eln
4.00127e-07	3.48866	0.929	0.325	0.00562219	2_1	Nov
4.12237e-07	2.88001	0.571	0.118	0.00579235	2_1	Anpep
4.1973e-07	2.10459	1	0.496	0.00589763	2_1	Zfp36
4.2879e-07	1.99041	0.286	0.025	0.00602493	2_1	Clec3b
4.81177e-07	2.62761	1	0.518	0.00676101	2_1	Col6a2
5.22557e-07	2.60127	0.571	0.107	0.00734246	2_1	Pcolce2
5.73255e-07	3.15299	0.571	0.114	0.00805481	2_1	3632451O06Rik
5.8557e-07	3.04712	0.714	0.214	0.00822784	2_1	Thbd
5.97851e-07	2.18806	1	0.818	0.00840041	2_1	Cpe
6.42233e-07	2.10547	1	0.614	0.00902402	2_1	Adamts2
6.51493e-07	1.98511	0.714	0.179	0.00915412	2_1	Egfr
7.41352e-07	2.45776	1	0.646	0.0104167	2_1	Col6a1
7.60158e-07	1.91171	1	0.796	0.010681	2_1	Fos
8.12723e-07	3.1265	1	0.557	0.0114196	2_1	Btg2
8.96863e-07	6.18051	0.429	0.071	0.0126018	2_1	Gdf10
9.5339e-07	2.70443	0.643	0.136	0.0133961	2_1	Hopx
1.07194e-06	1.15098	0.571	0.118	0.0150618	2_1	Man1c1
1.13036e-06	3.06679	0.714	0.229	0.0158827	2_1	Angpt2
1.16174e-06	2.85219	1	0.464	0.0163236	2_1	Sepp1
1.57645e-06	3.10493	0.429	0.068	0.0221507	2_1	Abca2
1.72388e-06	3.44779	0.357	0.046	0.0242223	2_1	Wfdc1
1.73875e-06	3.72909	0.786	0.339	0.0244312	2_1	Fndc1
1.92484e-06	1.49233	1	0.986	0.0270459	2_1	Col5a1
2.12887e-06	2.69002	0.286	0.029	0.0299127	2_1	Foxf1
2.14736e-06	4.26726	0.429	0.071	0.0301726	2_1	Sqrdl
2.18717e-06	2.73561	0.857	0.368	0.0307319	2_1	Klf2
2.65617e-06	2.43169	1	0.564	0.0373218	2_1	Akap12
2.90805e-06	3.68633	0.857	0.382	0.040861	2_1	Pkdcc
2.96284e-06	3.11457	0.714	0.236	0.0416309	2_1	Galnt16
3.17531e-06	3.32009	0.5	0.104	0.0446163	2_1	Snora31
3.53908e-06	2.37591	0.786	0.261	0.0497276	2_1	Has1
3.80163e-06	3.4202	0.857	0.414	0.0534167	2_1	Cped1
4.06638e-06	5.06695	0.286	0.032	0.0571367	2_1	Slc2a12
4.13686e-06	3.07653	0.714	0.236	0.058127	2_1	Ephb3
4.32919e-06	2.95601	0.571	0.139	0.0608295	2_1	Dolpp1
4.57097e-06	2.82241	1	0.614	0.0642268	2_1	Kcnq1ot1
4.70139e-06	2.86753	1	0.725	0.0660592	2_1	Fhl1
4.91117e-06	4.08803	0.429	0.075	0.0690068	2_1	Arap2
5.56888e-06	1.78276	0.929	0.629	0.0782483	2_1	Junb
5.60576e-06	1.8343	0.643	0.182	0.0787665	2_1	Adamts9
5.65692e-06	3.53042	0.429	0.079	0.0794853	2_1	Ntn1
5.75392e-06	2.15713	0.714	0.229	0.0808483	2_1	Osr1
5.82873e-06	1.96766	1	0.55	0.0818994	2_1	Lrrc17
6.14261e-06	2.20896	1	0.7	0.0863098	2_1	Col6a3
6.35334e-06	0.339932	0.571	0.118	0.0892708	2_1	Serpinb9
6.4987e-06	3.15879	0.714	0.246	0.0913133	2_1	Dpep1
6.68858e-06	2.76806	1	0.575	0.0939813	2_1	Cxcl12
7.38846e-06	2.51156	1	0.807	0.103815	2_1	Ptrf
8.26732e-06	3.24439	0.357	0.054	0.116164	2_1	Bik
8.47428e-06	1.76893	0.429	0.075	0.119072	2_1	Cyp1b1
9.07955e-06	1.69464	1	0.896	0.127577	2_1	Igfbp4
9.59335e-06	2.34644	0.857	0.361	0.134796	2_1	Gstm2
1.00182e-05	1.75917	1	0.657	0.140765	2_1	Col4a1
1.36246e-05	3.15068	0.714	0.257	0.191439	2_1	Cdc42ep2
1.38408e-05	2.51033	0.643	0.182	0.194478	2_1	Cygb
1.45592e-05	2.03866	0.786	0.343	0.204571	2_1	Jag1
1.47878e-05	1.98478	1	0.893	0.207784	2_1	Ltbp4
1.48616e-05	2.69694	0.714	0.275	0.208821	2_1	Pcdh7
1.49662e-05	3.79509	0.357	0.057	0.21029	2_1	Il33
1.53481e-05	2.43142	1	0.686	0.215656	2_1	Lox
1.57067e-05	2.8818	1	0.675	0.220694	2_1	Plagl1
1.62455e-05	3.22239	0.357	0.057	0.228265	2_1	Samd9l
1.64567e-05	2.21475	1	0.518	0.231233	2_1	Col4a2
1.83336e-05	2.42962	0.5	0.114	0.257606	2_1	Atg16l2
2.00769e-05	1.50285	0.786	0.332	0.282101	2_1	Nupr1
2.02606e-05	1.30261	0.571	0.139	0.284682	2_1	Akr1c14
2.03517e-05	1.67822	1	0.757	0.285962	2_1	Loxl1
2.08068e-05	2.08097	0.857	0.429	0.292357	2_1	Pde5a
2.33606e-05	2.9572	0.714	0.304	0.328239	2_1	Eml1
2.39189e-05	0.268464	0.357	0.057	0.336084	2_1	Fgf10
2.42204e-05	3.03814	0.571	0.168	0.34032	2_1	Gm3893
2.48931e-05	2.54543	0.357	0.061	0.349772	2_1	Slc36a1
2.68146e-05	2.43267	0.714	0.254	0.376773	2_1	Ablim1
2.7529e-05	1.51095	1	0.786	0.38681	2_1	Gpc6
2.76266e-05	1.14612	1	0.432	0.388182	2_1	Cav1
2.81974e-05	2.05442	0.857	0.471	0.396202	2_1	Klf4
2.98958e-05	3.56607	0.786	0.418	0.420066	2_1	Arap1
3.04433e-05	1.18792	0.357	0.061	0.427759	2_1	Svep1
3.10173e-05	2.76494	0.929	0.643	0.435823	2_1	Cdkn1c
3.18308e-05	2.72851	0.929	0.468	0.447254	2_1	Clca3a1
3.21505e-05	2.78894	0.786	0.3	0.451747	2_1	Boc
3.24028e-05	2.339	0.929	0.482	0.455291	2_1	Nr4a1
3.30582e-05	2.22407	0.714	0.282	0.464501	2_1	Creb3l1
3.65242e-05	2.09783	0.857	0.396	0.513202	2_1	Matn2
3.75975e-05	2.54622	0.786	0.368	0.528282	2_1	Rnf144a
3.79093e-05	3.84061	0.357	0.064	0.532663	2_1	Klf15
4.01472e-05	1.16853	0.5	0.114	0.564109	2_1	Fam120c
4.08808e-05	2.94316	0.429	0.093	0.574416	2_1	Sec16b
4.47151e-05	4.97653	0.429	0.104	0.628291	2_1	Agtr2
4.73822e-05	3.03323	0.357	0.064	0.665767	2_1	Pi16
4.76847e-05	1.62454	1	0.8	0.670017	2_1	Ccdc80
4.85549e-05	1.24346	1	0.943	0.682245	2_1	Fbn1
5.01749e-05	2.80382	0.429	0.093	0.705008	2_1	Tnik
5.1557e-05	3.11098	0.643	0.204	0.724428	2_1	Olfm1
5.17889e-05	2.3183	0.857	0.393	0.727685	2_1	Serping1
5.20084e-05	2.33297	0.571	0.168	0.73077	2_1	Tfpi
5.39208e-05	2.16183	0.714	0.257	0.757642	2_1	Ifi30
5.46119e-05	2.03888	1	0.954	0.767352	2_1	Cst3
5.54603e-05	0.775619	0.429	0.093	0.779272	2_1	Pex10
5.63359e-05	1.49068	0.571	0.157	0.791575	2_1	Ggta1
5.65632e-05	2.39834	0.786	0.357	0.79477	2_1	Dhrs3
5.65949e-05	1.91685	0.357	0.064	0.795215	2_1	Asap3
5.80691e-05	1.58442	0.786	0.336	0.815929	2_1	Ssc5d
6.15018e-05	0.432367	0.429	0.093	0.864161	2_1	Dmtn
6.15657e-05	2.81974	0.714	0.271	0.86506	2_1	Fam46a
6.50577e-05	1.72947	0.643	0.193	0.914126	2_1	Fzd4
6.62444e-05	3.83753	0.643	0.243	0.930801	2_1	Per1
7.21949e-05	2.56294	0.357	0.068	1	2_1	Cpz
7.24004e-05	3.15192	0.643	0.236	1	2_1	Cacna1g
7.6057e-05	2.10547	0.571	0.175	1	2_1	Socs1
7.91059e-05	1.50583	0.357	0.064	1	2_1	Rbks
8.54917e-05	1.33999	1	0.796	1	2_1	Lrp1
8.97603e-05	1.58064	0.929	0.625	1	2_1	Celf2
9.2944e-05	1.45594	1	0.871	1	2_1	Egr1
9.30451e-05	0.562079	0.357	0.068	1	2_1	Zfp324
9.82553e-05	1.41179	1	0.95	1	2_1	Bgn
0.000115448	2.95931	0.786	0.439	1	2_1	4933409K07Rik
0.000118913	2.29526	0.786	0.429	1	2_1	Tgfbr2
0.000119731	4.20722	0.286	0.046	1	2_1	Ston2
0.000140526	2.87988	0.5	0.143	1	2_1	Klf9
0.000140845	2.77539	0.286	0.046	1	2_1	Mpp3
0.000147856	1.5105	0.786	0.357	1	2_1	Sema5a
0.000149237	3.24506	0.5	0.129	1	2_1	Kcnip3
0.000157534	1.43929	1	0.9	1	2_1	Mfap4
0.000160556	1.36828	0.929	0.95	1	2_1	Nfix
0.000167244	1.91637	1	0.832	1	2_1	Ahnak
0.000170261	3.4355	0.429	0.107	1	2_1	Col8a2
0.000171363	3.32026	0.357	0.075	1	2_1	Cobll1
0.00017209	3.80243	0.714	0.325	1	2_1	Tppp3
0.000172671	1.60363	1	0.589	1	2_1	Nrp1
0.000173879	0.810044	0.929	0.529	1	2_1	Pdcd4
0.000176407	1.33593	0.857	0.364	1	2_1	Ltbp2
0.000177833	2.06942	0.5	0.136	1	2_1	Fam109b
0.000182601	2.55335	0.714	0.264	1	2_1	Bin1
0.000188128	2.34658	0.857	0.339	1	2_1	Gucy1a3
0.000204969	2.21948	0.929	0.457	1	2_1	Cebpb
0.00021043	1.37693	1	1	1	2_1	Col3a1
0.000211369	1.75577	0.857	0.386	1	2_1	Slc29a1
0.000224653	3.16881	0.357	0.075	1	2_1	Abcb1b
0.000226552	3.78753	0.5	0.129	1	2_1	Prkab2
0.000232519	2.1192	0.857	0.461	1	2_1	Mast4
0.000245084	2.2944	0.5	0.132	1	2_1	Mirg
0.000245615	1.891	0.929	0.754	1	2_1	Antxr1
0.000262117	0.879378	0.357	0.075	1	2_1	Zfp78
0.00026948	1.55402	0.857	0.35	1	2_1	Rasl11a
0.000269858	2.73697	0.357	0.079	1	2_1	Wdr54
0.000285205	2.57909	0.286	0.05	1	2_1	4931406H21Rik
0.000317781	2.27692	0.429	0.114	1	2_1	Arhgap24
0.000321142	2.65525	0.357	0.079	1	2_1	Cd82
0.000321629	1.72798	0.857	0.575	1	2_1	Lsp1
0.000330028	2.74917	0.643	0.289	1	2_1	Srpx
0.000342388	1.50401	0.786	0.461	1	2_1	Glis2
0.000344964	0.856323	1	0.989	1	2_1	Jund
0.000345914	1.82155	0.5	0.154	1	2_1	Cd55
0.000367657	2.51709	0.357	0.079	1	2_1	Ebf2
0.000372603	2.0245	0.571	0.2	1	2_1	Olfr1033
0.000385069	1.77366	0.429	0.107	1	2_1	Wnt5b
0.000395155	2.25511	0.714	0.311	1	2_1	Bcl2
0.000446984	2.46463	0.786	0.396	1	2_1	Svil
0.000456001	2.11431	0.643	0.275	1	2_1	AA465934
0.000458457	2.30171	0.5	0.15	1	2_1	Pygl
0.000470661	0.790579	0.429	0.111	1	2_1	Map3k7cl
0.00047304	0.285095	0.714	0.268	1	2_1	Kdm4c
0.000477275	1.73227	0.786	0.425	1	2_1	Zfp395
0.000485675	2.48847	0.286	0.054	1	2_1	2022-03-03
0.000489967	0.782989	0.714	0.293	1	2_1	Dock6
0.000493781	0.974789	0.786	0.357	1	2_1	Trim47
0.000496692	1.60509	0.786	0.318	1	2_1	Six5
0.000520262	2.42484	0.429	0.118	1	2_1	Hyal1
0.000545007	1.71557	0.643	0.271	1	2_1	Aqp1
0.000551129	0.571628	0.286	0.054	1	2_1	Slc25a42
0.00056765	1.96889	0.5	0.168	1	2_1	Crispld2
0.00058352	2.32013	0.429	0.125	1	2_1	Nrbp2
0.000585078	2.5303	0.786	0.418	1	2_1	Kdelc2
0.000612503	1.16981	0.571	0.214	1	2_1	5730409E04Rik
0.000619101	2.58201	0.429	0.125	1	2_1	Ldlr
0.000633647	2.18011	0.286	0.054	1	2_1	Il4ra
0.000643816	1.57104	0.786	0.418	1	2_1	1700025G04Rik
0.00066023	0.829081	0.929	0.564	1	2_1	Cnot6l
0.000714293	0.845346	1	0.993	1	2_1	Fbln2
0.000724742	2.29678	0.643	0.286	1	2_1	Plxna3
0.000743628	1.86669	0.857	0.589	1	2_1	Txnip
0.000753614	1.18484	1	0.746	1	2_1	Dkk3
0.000761929	1.0807	1	0.875	1	2_1	Mgp
0.0007654	3.58334	0.5	0.179	1	2_1	Dtx4
0.000768623	1.00348	1	0.714	1	2_1	Pls3
0.000775222	1.19258	0.714	0.271	1	2_1	Trabd2b
0.000784375	1.28715	1	0.993	1	2_1	Igf2
0.000784751	0.928783	0.429	0.118	1	2_1	Ephb2
0.000791877	1.07865	1	0.864	1	2_1	Myadm
0.000813263	1.35952	0.929	0.621	1	2_1	Angptl2
0.000813297	2.0666	0.429	0.125	1	2_1	Sppl2b
0.000816318	4.36198	0.286	0.057	1	2_1	4930549C15Rik
0.000816715	2.39065	0.714	0.429	1	2_1	Islr
0.000900223	1.51317	0.714	0.3	1	2_1	Dvl1
0.000914076	2.52697	0.571	0.236	1	2_1	Arhgap23
0.000930344	1.81688	0.429	0.125	1	2_1	Hoxb2
0.000938439	2.7401	0.714	0.314	1	2_1	Hif3a
0.000944434	2.46373	0.643	0.286	1	2_1	Zfp651
0.000948348	3.20429	0.5	0.15	1	2_1	Rhot2
0.000950039	2.80092	0.5	0.189	1	2_1	Fam129a
0.000999635	2.22541	0.857	0.436	1	2_1	Atp11a
0.00100769	1.54634	1	0.879	1	2_1	Nid1
0.00104262	2.23712	0.429	0.118	1	2_1	Hic1
0.00106409	1.71984	0.786	0.4	1	2_1	Efnb2
0.00106717	0.938874	1	0.914	1	2_1	Timp2
0.00110155	1.02539	0.714	0.339	1	2_1	Snhg9
0.00115281	2.2639	0.929	0.796	1	2_1	Adamts1
0.00116673	2.75868	0.286	0.061	1	2_1	1110019D14Rik
0.00118705	1.02425	0.429	0.125	1	2_1	Plekhh3
0.00118906	2.15701	0.357	0.096	1	2_1	Rnd2
0.0012002	2.47673	0.714	0.429	1	2_1	Cebpd
0.00122003	1.10849	0.786	0.375	1	2_1	Cspg4
0.00122662	0.705891	1	1	1	2_1	Rn45s
0.00123579	2.22455	0.5	0.179	1	2_1	Sik3
0.00129556	3.6051	0.429	0.129	1	2_1	Fam205a1
0.00129984	1.22555	0.714	0.354	1	2_1	Thbs3
0.00130071	1.15097	1	0.693	1	2_1	Dcn
0.00135601	1.31316	1	0.868	1	2_1	2610005L07Rik
0.00138135	1.55835	0.571	0.214	1	2_1	Ror1
0.00138856	1.2769	0.857	0.489	1	2_1	Adamts10
0.00140387	2.4729	0.714	0.404	1	2_1	Rgs5
0.00141908	1.13322	1	0.693	1	2_1	Pcolce
0.00142447	4.75534	0.5	0.211	1	2_1	5031426D15Rik
0.00142806	1.64458	0.857	0.536	1	2_1	Notch3
0.00145396	3.32533	0.571	0.257	1	2_1	C1qtnf2
0.00145492	1.80194	0.857	0.511	1	2_1	B4galt1
0.00147166	0.663297	0.5	0.161	1	2_1	Acox3
0.00151678	0.867774	1	0.993	1	2_1	Serpinh1
0.00153471	1.34466	0.571	0.2	1	2_1	Entpd4
0.00161466	0.553961	0.286	0.061	1	2_1	Slc2a4
0.00163926	1.28908	0.714	0.343	1	2_1	Spry1
0.00165922	1.6911	0.929	0.65	1	2_1	Xist
0.00169418	1.81193	0.786	0.389	1	2_1	Pold2
0.00174974	1.34513	0.857	0.543	1	2_1	Mcmbp
0.00176128	1.86397	0.286	0.061	1	2_1	Il17rd
0.00177903	1.77878	0.643	0.236	1	2_1	Rcan2
0.00179742	1.9873	0.5	0.164	1	2_1	Plekho2
0.00188795	1.51825	0.857	0.461	1	2_1	Lamb2
0.00189472	1.60505	0.286	0.061	1	2_1	Ttc38
0.00189831	0.920134	0.929	0.514	1	2_1	C1qtnf6
0.00190942	3.93726	0.286	0.064	1	2_1	Zfp438
0.00191191	2.17916	0.357	0.104	1	2_1	Tshz3
0.00196641	1.00816	0.929	0.668	1	2_1	Gsn
0.00200259	2.02647	0.286	0.064	1	2_1	3830408C21Rik
0.00201608	1.66489	0.786	0.45	1	2_1	2022-09-08
0.00202461	1.29049	0.929	0.482	1	2_1	Slc8a1
0.00205139	1.36323	0.929	0.768	1	2_1	Nenf
0.00205436	3.70498	0.286	0.068	1	2_1	Tmem220
0.00207567	0.723379	1	0.536	1	2_1	Cd200
0.00210304	2.42077	0.286	0.068	1	2_1	Nrtn
0.00211506	2.74923	0.5	0.2	1	2_1	Grb14
0.00217191	3.152	0.429	0.136	1	2_1	Nhsl2
0.00220097	0.89242	0.286	0.068	1	2_1	B4galnt2
0.00221084	0.86326	1	0.836	1	2_1	Fbln5
0.00221906	1.77689	0.857	0.479	1	2_1	Nucb2
0.00224553	2.18718	0.786	0.489	1	2_1	Cbx6
0.002253	1.42015	0.643	0.271	1	2_1	Zdhhc9
0.00225876	1.11041	1	0.868	1	2_1	Ccnd2
0.00228319	1.7716	0.357	0.1	1	2_1	Fez1
0.00232811	2.29057	0.714	0.375	1	2_1	Phldb1
0.00233206	2.40652	0.714	0.386	1	2_1	Rara
0.002362	0.477652	0.857	0.45	1	2_1	Tm4sf1
0.0023823	1.11565	0.929	0.639	1	2_1	Dcaf8
0.0024415	0.774828	1	0.543	1	2_1	Tm9sf1
0.00250742	3.23712	0.571	0.243	1	2_1	Lmod1
0.00259485	0.605089	0.643	0.257	1	2_1	Cav2
0.00261701	2.66778	0.357	0.1	1	2_1	Tmem241
0.00264798	0.748592	0.857	0.486	1	2_1	Por
0.00271482	0.577237	0.714	0.286	1	2_1	Vopp1
0.00271696	1.10158	0.429	0.132	1	2_1	Abcc1
0.00275528	1.95287	0.786	0.721	1	2_1	Tns1
0.00277116	2.64224	0.286	0.071	1	2_1	Abca7
0.00280385	0.752179	0.357	0.093	1	2_1	Slc22a21
0.00285774	0.941444	1	0.832	1	2_1	Il11ra1
0.00289427	2.31787	0.286	0.068	1	2_1	Chrnb1
0.00290073	1.20265	0.929	0.482	1	2_1	Emp2
0.00293367	1.58385	0.429	0.139	1	2_1	Zscan22
0.00296033	0.538722	0.429	0.136	1	2_1	Gk5
0.00297583	2.12021	0.714	0.4	1	2_1	Kank2
0.00300062	2.57657	0.5	0.2	1	2_1	Heg1
0.00305129	0.582607	0.929	0.536	1	2_1	Hexa
0.00317097	0.912518	0.571	0.221	1	2_1	Gstt1
0.00321699	0.981897	0.643	0.293	1	2_1	Ctsk
0.00325759	1.29435	0.857	0.625	1	2_1	Thra
0.00327094	2.3685	0.286	0.071	1	2_1	Parp3
0.00328561	0.821762	0.429	0.15	1	2_1	Zfp946
0.00329917	3.02666	0.5	0.204	1	2_1	Map1a
0.00331978	1.49108	0.786	0.596	1	2_1	Arhgef25
0.00342122	1.23974	1	0.607	1	2_1	Gga2
0.00359676	0.34469	0.5	0.2	1	2_1	Evc
0.00367818	0.498377	0.857	0.45	1	2_1	Pik3r1
0.00377802	1.32531	0.643	0.3	1	2_1	Zfp146
0.00381357	1.13619	0.929	0.582	1	2_1	Cdc37l1
0.00386388	3.67322	0.5	0.246	1	2_1	Nbl1
0.0039805	1.27757	0.857	0.536	1	2_1	Cpxm1
0.00403105	1.64832	0.857	0.661	1	2_1	Tmed3
0.00404737	3.16292	0.357	0.104	1	2_1	Angptl7
0.00404916	1.695	0.857	0.618	1	2_1	2900060B14Rik
0.00409274	0.833168	0.429	0.146	1	2_1	Aoc3
0.00413017	1.68292	0.643	0.336	1	2_1	S100a16
0.00421157	0.526308	0.786	0.4	1	2_1	Ilvbl
0.00426534	1.62302	0.786	0.518	1	2_1	Hdac7
0.00438309	1.71511	1	0.814	1	2_1	Pmepa1
0.00438379	0.695158	1	0.686	1	2_1	Sec24d
0.00438409	2.84106	0.5	0.254	1	2_1	Tnfsf12
0.00446353	1.67569	0.5	0.196	1	2_1	Vldlr
0.0044859	1.39169	0.714	0.496	1	2_1	Tspan18
0.00458625	1.4354	0.714	0.357	1	2_1	Ifi27
0.00460558	3.51292	0.357	0.121	1	2_1	Tbc1d2b
0.00473704	1.67872	1	0.711	1	2_1	Trio
0.00481597	1.2738	0.786	0.479	1	2_1	Cd248
0.00482568	1.16141	0.357	0.1	1	2_1	Cobl
0.00482622	0.994013	1	0.793	1	2_1	Ski
0.00483385	1.41164	0.714	0.446	1	2_1	Sulf1
0.00491159	1.59405	0.929	0.782	1	2_1	Ganab
0.00500383	3.48694	0.286	0.082	1	2_1	Cntn6
0.00516794	1.44801	0.286	0.079	1	2_1	Atp10a
0.00517283	2.45884	0.571	0.246	1	2_1	Cd93
0.005185	1.22596	1	0.721	1	2_1	Pmp22
0.00522683	2.20213	0.714	0.314	1	2_1	Nrm
0.0052838	1.49907	0.357	0.111	1	2_1	S1pr1
0.00531249	2.92414	0.571	0.282	1	2_1	Prdm6
0.00537902	1.06223	0.429	0.157	1	2_1	Samd5
0.0054101	0.772297	1	0.843	1	2_1	Selm
0.0054573	0.660276	0.857	0.539	1	2_1	Apc
0.00545928	3.05264	0.357	0.125	1	2_1	AF357425
0.00546759	0.988531	0.429	0.161	1	2_1	Atf5
0.00548084	1.38043	0.429	0.146	1	2_1	Spin4
0.00550217	1.45615	0.857	0.639	1	2_1	Bicc1
0.00561904	1.14127	1	0.739	1	2_1	Oat
0.00576784	1.61775	0.643	0.361	1	2_1	Qsox1
0.00599627	1.09473	1	0.686	1	2_1	Atp6ap1
0.00606708	4.02772	0.286	0.079	1	2_1	Tmem106a
0.00606916	2.04042	0.429	0.157	1	2_1	Hspb8
0.00607703	0.694762	0.286	0.075	1	2_1	Cptp
0.00615328	0.810428	0.286	0.082	1	2_1	Hecw1
0.00615635	1.90563	0.643	0.371	1	2_1	Wisp1
0.00628694	0.47004	0.571	0.236	1	2_1	Casp12
0.00632216	0.61321	0.429	0.15	1	2_1	Plcb1
0.0063232	0.926639	1	0.671	1	2_1	Prrc1
0.00637334	1.53302	1	0.871	1	2_1	Pbx1
0.00646785	0.859308	1	0.757	1	2_1	Smarca2
0.00652712	1.49138	0.429	0.154	1	2_1	S100a4
0.00652918	3.15046	0.286	0.082	1	2_1	Fap
0.00659337	2.73638	0.286	0.082	1	2_1	Tgm2
0.00661285	0.852188	0.786	0.514	1	2_1	Arf3
0.00663871	1.67166	0.429	0.157	1	2_1	Fhod1
0.00678704	3.18137	0.286	0.082	1	2_1	Ppip5k1
0.00682484	1.29327	0.857	0.546	1	2_1	Ebf1
0.00686556	1.06715	0.429	0.164	1	2_1	Igip
0.00686802	1.40468	0.786	0.589	1	2_1	Col16a1
0.00688265	1.83411	0.357	0.118	1	2_1	Trim56
0.00700221	1.25444	1	0.786	1	2_1	Fgfr1
0.00706408	2.48591	0.5	0.232	1	2_1	Fgl2
0.00710841	0.612904	0.286	0.079	1	2_1	Adam11
0.00717287	1.72883	1	0.879	1	2_1	Zfp36l1
0.00717463	1.53127	0.786	0.457	1	2_1	Tmem131
0.00745747	2.29595	0.357	0.125	1	2_1	Syt1
0.00747833	1.53238	0.357	0.118	1	2_1	Gas2
0.00754808	2.98688	0.357	0.129	1	2_1	Pcsk7
0.0076506	0.554429	0.643	0.279	1	2_1	Pacs1
0.0076873	1.257	0.286	0.079	1	2_1	Fam72a
0.0077506	1.12933	1	0.707	1	2_1	Ptprd
0.00775378	2.39766	0.286	0.082	1	2_1	Nod1
0.00777347	1.77721	0.786	0.625	1	2_1	Dnajb1
0.00795269	0.706397	1	0.593	1	2_1	Emp1
0.00797883	1.05786	0.786	0.454	1	2_1	Slc25a51
0.00801551	2.09577	0.643	0.357	1	2_1	Tmem47
0.00802812	1.39103	0.857	0.6	1	2_1	Ddr2
0.00804822	1.39995	1	0.668	1	2_1	Prkcdbp
0.00813701	0.904721	1	1	1	2_1	Malat1
0.0081573	0.407105	0.571	0.268	1	2_1	Akap7
0.00821468	1.97744	0.429	0.157	1	2_1	Ighmbp2
0.00846008	1.43793	0.357	0.114	1	2_1	Cacna1c
0.00846114	0.995429	0.857	0.836	1	2_1	Myh9
0.00849885	0.579951	0.643	0.293	1	2_1	Pole2
0.00881383	1.0544	1	0.943	1	2_1	Cald1
0.00887386	1.43936	0.643	0.332	1	2_1	Ehd2
0.00898843	2.43879	0.857	0.675	1	2_1	Daam1
0.00904788	0.63704	0.5	0.182	1	2_1	Pcid2
0.00915302	1.82453	0.5	0.211	1	2_1	Adgrb2
0.00919937	1.97231	0.429	0.179	1	2_1	Scarb1
0.00926598	2.06736	0.786	0.411	1	2_1	Atf3
0.00938724	1.84598	0.429	0.186	1	2_1	Pgm5
0.00939553	1.30879	0.357	0.118	1	2_1	Il10rb
0.00947355	1.09413	1	0.896	1	2_1	Igsf3
0.00951143	2.42695	0.5	0.211	1	2_1	Vps37b
0.00962851	2.21956	0.714	0.482	1	2_1	Dnajc13
0.00969176	1.97636	1	0.718	1	2_1	Fblim1
0.0097626	1.04475	0.286	0.086	1	2_1	Apba1
0.0098347	0.535733	1	0.671	1	2_1	Igfbp7
0.00988096	1.34013	0.786	0.446	1	2_1	Cdca4
2.37452e-13	1.95345	1	1	3.33644e-09	3	Lars2
2.47964e-07	0.916853	1	0.992	0.00348414	3	Igf2
2.69849e-07	1.22735	1	1	0.00379165	3	Rpsa
2.91095e-07	2.57929	0.333	0.061	0.00409018	3	Gm19583
3.26667e-07	2.09319	0.9	0.633	0.00459	3	Hmga2
3.32881e-07	3.11018	0.333	0.061	0.00467731	3	C1qa
6.57912e-07	1.30621	1	1	0.00924432	3	Rn45s
8.30373e-07	0.86938	1	1	0.0116676	3	Rps20
1.21728e-06	1.74288	0.933	0.716	0.017104	3	Inhba
3.6196e-06	1.88161	0.4	0.114	0.0508589	3	Dnah6
6.51445e-06	1.56478	1	0.958	0.0915345	3	Ddb1
1.18837e-05	1.56597	1	0.977	0.166978	3	Ptprs
1.89395e-05	0.924394	0.9	0.875	0.266119	3	Mir6236
2.19459e-05	2.01399	0.9	0.659	0.308361	3	Igf2bp1
2.5097e-05	1.58357	0.967	0.864	0.352638	3	Tgfbi
4.62487e-05	1.61124	0.267	0.057	0.649841	3	Trib3
7.01902e-05	0.5051	0.067	0.481	0.986242	3	Gnpat
7.27331e-05	1.00473	1	0.992	1	3	Flna
7.69906e-05	0.666327	1	1	1	3	Rps8
7.90649e-05	4.63366	0.267	0.064	1	3	Gckr
8.70426e-05	0.798017	1	0.981	1	3	Rps13
0.000100663	0.928648	1	1	1	3	Rplp1
0.000149791	0.506693	0.233	0.606	1	3	Sft2d1
0.00022022	0.644918	0.033	0.402	1	3	Asf1b
0.000221024	0.816964	0.033	0.402	1	3	Anln
0.000230222	0.896369	0.367	0.633	1	3	Mest
0.000234649	0.964467	1	0.977	1	3	Rps12
0.000235813	0.361675	0.233	0.674	1	3	Emc4
0.000254047	2.10263	0.767	0.652	1	3	Sfi1
0.000273179	0.640997	0.333	0.106	1	3	P2rx7
0.000279032	0.981144	1	1	1	3	Rps27a
0.000295341	1.76953	0.267	0.068	1	3	Ddx25
0.00033588	0.952577	0.333	0.667	1	3	Snai2
0.000340022	0.382486	0.033	0.386	1	3	Tspan4
0.000379354	1.46717	0.033	0.383	1	3	Arhgap11a
0.000437669	0.682148	1	1	1	3	Rpl17
0.000453058	1.34221	0.433	0.784	1	3	Vps35
0.000462607	1.01508	0.467	0.765	1	3	Mff
0.000464675	0.672401	1	1	1	3	Rps26
0.000497367	0.738114	1	0.996	1	3	H19
0.000520911	1.6986	0.1	0.477	1	3	Tet1
0.000538865	1.24423	1	1	1	3	Rpl8
0.000549944	0.42397	0.233	0.553	1	3	Tcaf1
0.000554913	0.778593	0.133	0.462	1	3	Hs2st1
0.000632349	0.80148	0.167	0.515	1	3	Nedd1
0.000673752	2.39893	0.267	0.076	1	3	Il3ra
0.000677771	0.295621	0.267	0.701	1	3	Gm14420
0.000779977	0.61948	1	0.977	1	3	Vcan
0.000803356	1.68082	0.633	0.409	1	3	Itga4
0.000827169	0.523183	0.1	0.455	1	3	Tshz1
0.000835667	0.964574	0.133	0.489	1	3	Esyt2
0.000894105	1.53858	0.533	0.258	1	3	Edn1
0.000908518	0.348843	0.433	0.78	1	3	Ssna1
0.00093151	0.457633	0.367	0.693	1	3	Tmod3
0.000960979	0.695483	0.167	0.523	1	3	1810055G02Rik
0.000995431	0.784642	1	1	1	3	Rpl10a
0.00109534	0.500282	1	0.856	1	3	Tagln
0.0011105	0.284556	0.3	0.61	1	3	Mcm7
0.00117259	1.17804	1	0.958	1	3	Uqcr10
0.00117281	0.299751	0.067	0.405	1	3	Hist1h1c
0.00117549	1.17004	0.967	0.936	1	3	Sox4
0.00118718	0.54942	1	1	1	3	Actb
0.00121567	2.49408	0.6	0.451	1	3	Fhl3
0.00126996	0.489699	1	1	1	3	Tmsb10
0.00127554	0.870906	0.467	0.777	1	3	Polr1d
0.00129704	1.76945	0.033	0.337	1	3	3830406C13Rik
0.00133141	1.76027	0.933	0.909	1	3	Luc7l3
0.0013567	1.08625	0.267	0.083	1	3	Pcdh10
0.00139889	0.604933	0.267	0.617	1	3	Ufc1
0.00140695	0.774269	0.133	0.496	1	3	Ermard
0.00143427	1.50403	0.033	0.333	1	3	Cox6b2
0.00143625	1.39906	0.067	0.379	1	3	Ppap2b
0.00146024	0.809583	0.433	0.777	1	3	Dctn6
0.00148471	1.39344	0.9	0.845	1	3	Vaultrc5
0.0015502	1.06408	0.133	0.47	1	3	Ten1
0.00156831	1.73953	0.467	0.231	1	3	Tcirg1
0.00163813	0.482751	1	1	1	3	Tpt1
0.00167493	0.577882	0.267	0.564	1	3	Rnft1
0.00174827	0.813373	0.133	0.511	1	3	Zc3h4
0.00178951	0.623721	0.167	0.508	1	3	Chmp6
0.00182563	0.250758	0.1	0.424	1	3	Tmem101
0.001888	1.82009	0.8	0.617	1	3	Ehmt2
0.00191116	0.62529	1	1	1	3	Hsp90ab1
0.00191473	1.27682	0.033	0.322	1	3	Ccdc138
0.0019277	0.526725	0.233	0.625	1	3	1810009A15Rik
0.00194781	1.22843	0.967	0.985	1	3	Igf2r
0.00201409	2.56423	0.067	0.383	1	3	2810013P06Rik
0.0021588	0.681508	1	1	1	3	Rpl38
0.00222202	0.532562	0.3	0.693	1	3	Dcaf8
0.00222269	0.946336	0.833	0.652	1	3	Adgrl1
0.00223393	0.42383	0.833	0.561	1	3	Hapln1
0.0022981	0.659343	0.167	0.504	1	3	Lsg1
0.00235822	2.35819	0.3	0.583	1	3	Apc
0.00236656	0.474843	0.2	0.523	1	3	Nit2
0.00237271	0.610782	1	1	1	3	Rpl13a
0.0024268	0.787796	1	0.996	1	3	Ndufa2
0.00249538	0.549233	0.267	0.595	1	3	Hint2
0.00252043	0.433102	0.2	0.534	1	3	Kin
0.00253946	0.290344	0.333	0.625	1	3	Gcsh
0.00257155	0.307028	0.2	0.553	1	3	Hmox2
0.00263639	0.380869	0.133	0.47	1	3	Tbc1d7
0.00275081	0.98043	0.1	0.436	1	3	Dtd2
0.00277466	2.50703	0.3	0.121	1	3	Olfr1030
0.00283888	0.800887	0.067	0.348	1	3	Vwa5a
0.00294487	0.83383	0.1	0.409	1	3	Dhrs3
0.00320963	2.67822	0.533	0.345	1	3	Stxbp1
0.00322885	0.58861	1	1	1	3	Rpl41
0.00322889	0.908955	1	1	1	3	Gnb2l1
0.00328157	0.325125	0.133	0.455	1	3	0610011F06Rik
0.0033774	0.38749	0.467	0.735	1	3	Rnasek
0.00349974	0.680735	0.167	0.47	1	3	Rspo3
0.00352412	0.997705	1	1	1	3	Rps10
0.0035389	0.457274	0.1	0.394	1	3	Zbtb20
0.00376314	0.457719	0.133	0.462	1	3	Mut
0.00379655	0.424396	0.867	0.939	1	3	Ssb
0.00382005	0.307341	0.3	0.648	1	3	Sertad4
0.00385809	0.848309	1	0.992	1	3	Dpysl3
0.00395651	0.577043	1	0.996	1	3	Rps4x
0.00405463	1.27806	1	0.97	1	3	Pabpn1
0.00409543	0.563989	0.433	0.78	1	3	Pdhb
0.00412094	4.47343	0.3	0.133	1	3	5430401F13Rik
0.00424124	1.1495	0.133	0.466	1	3	Adamts5
0.00425642	0.78136	0.667	0.473	1	3	Mrgpra6
0.00431398	0.357978	0.433	0.72	1	3	Pole4
0.00445178	1.31311	0.9	0.754	1	3	Smad6
0.00448315	1.28623	0.033	0.288	1	3	Gins3
0.0045629	0.543221	0.067	0.341	1	3	1110032A03Rik
0.00459673	0.828017	1	1	1	3	Rpl5
0.00467456	0.926481	0.967	0.947	1	3	Ltbp1
0.00467839	0.631592	1	1	1	3	Rpl27a
0.0048099	1.31698	0.133	0.447	1	3	Atm
0.00486435	0.80649	0.967	1	1	3	Eef2
0.004968	0.499876	1	0.992	1	3	Rps15a
0.00499632	1.31552	0.067	0.333	1	3	A430033K04Rik
0.0050129	0.379477	0.567	0.777	1	3	Eif4e
0.00503568	0.272148	0.367	0.674	1	3	Fundc2
0.00506995	1.55361	0.067	0.348	1	3	Ago3
0.00511604	1.74368	0.3	0.136	1	3	Csn1s2b
0.00514365	0.566912	0.3	0.648	1	3	2410006H16Rik
0.00517123	0.342687	0.1	0.367	1	3	Cln5
0.00518515	0.656433	0.233	0.538	1	3	Ifnar2
0.00530592	0.560634	0.2	0.534	1	3	Coq10b
0.00532796	1.62078	0.067	0.341	1	3	Corin
0.00533837	1.16908	0.1	0.379	1	3	Fen1
0.00534785	0.333514	0.133	0.432	1	3	3110052M02Rik
0.00535587	2.65928	0.467	0.216	1	3	Pdgfc
0.00538447	1.54497	0.033	0.28	1	3	Akr1b8
0.00539929	0.630989	0.133	0.455	1	3	Ttc33
0.00542879	0.523873	0.5	0.773	1	3	Wwtr1
0.00545243	0.272766	0.267	0.553	1	3	Nkain4
0.00551734	1.11433	0.967	0.97	1	3	Atp5e
0.00566135	0.355853	0.2	0.538	1	3	Rgs3
0.0056656	0.375248	0.467	0.773	1	3	Rhobtb3
0.00566879	0.670916	0.233	0.538	1	3	Mrps35
0.00567403	0.634788	0.967	1	1	3	Fau
0.00569409	0.525758	1	1	1	3	Rps24
0.00572286	0.834487	0.167	0.451	1	3	Spg21
0.00582792	0.300547	0.167	0.462	1	3	Smim20
0.0058504	0.795785	0.133	0.42	1	3	Fez2
0.00588644	0.698675	0.233	0.5	1	3	Msantd2
0.0061093	0.331367	0.3	0.591	1	3	Ufl1
0.00618678	0.583608	1	1	1	3	Rpl28
0.00627126	0.863158	0.933	0.966	1	3	Ckap4
0.00640353	0.258957	1	0.992	1	3	Dnaja1
0.00652997	0.826116	0.133	0.428	1	3	Ctnnal1
0.00670125	1.39884	0.667	0.515	1	3	Tnni1
0.00671725	0.718367	1	0.977	1	3	Rpl22
0.00678717	0.686222	1	0.992	1	3	Srrm2
0.0068192	0.421222	0.567	0.845	1	3	Cul4b
0.00684406	0.87509	0.167	0.443	1	3	C330007P06Rik
0.00690863	0.46973	0.467	0.83	1	3	Eif1b
0.00704826	0.311346	0.267	0.534	1	3	Pogz
0.00714812	0.300976	0.167	0.481	1	3	Efhd2
0.0072152	0.469735	0.467	0.708	1	3	Ube2d1
0.00723912	0.563007	0.133	0.436	1	3	Mfsd10
0.00726479	0.719325	0.3	0.64	1	3	Dph3
0.00736097	0.858188	0.4	0.701	1	3	Pfdn4
0.00740401	0.275265	0.067	0.318	1	3	Mtmr14
0.00741415	0.744419	1	0.992	1	3	Atp5j2
0.00743715	0.323503	0.167	0.47	1	3	Iah1
0.00755869	0.338506	0.067	0.326	1	3	Wdr8
0.00773698	0.324199	0.433	0.716	1	3	Sde2
0.00774746	0.46566	0.3	0.598	1	3	Dleu2
0.007771	0.722315	0.933	0.97	1	3	Lsm7
0.00780663	0.299658	0.233	0.519	1	3	Rnf181
0.00781001	0.430394	0.333	0.629	1	3	Phc2
0.00785327	0.328823	0.067	0.311	1	3	Thumpd3
0.00787386	1.24168	1	0.943	1	3	Loxl2
0.00800878	1.9972	0.133	0.402	1	3	Lyrm5
0.00819818	1.05316	0.3	0.591	1	3	Fam76b
0.00821695	0.728031	0.167	0.477	1	3	Otud6b
0.00822638	1.14157	0.867	0.822	1	3	Ptgis
0.00827657	0.329655	0.1	0.383	1	3	Tmem251
0.00828242	0.388469	0.133	0.428	1	3	Tctex1d2
0.00833859	0.804529	0.933	0.97	1	3	Sfpq
0.00839068	0.812835	0.033	0.261	1	3	Zfp316
0.00840789	0.352112	0.067	0.311	1	3	Dcun1d3
0.00841775	1.94888	0.033	0.261	1	3	Amacr
0.00841815	0.400414	0.267	0.542	1	3	Sccpdh
0.00848533	1.23236	0.167	0.492	1	3	Mrps10
0.00850725	0.422498	0.2	0.504	1	3	Rngtt
0.00857577	0.633647	0.133	0.394	1	3	Fads3
0.00888952	0.704718	0.1	0.371	1	3	Hist1h4h
0.00894266	0.505533	0.1	0.371	1	3	Bre
0.00897358	0.804241	0.233	0.538	1	3	Pvrl3
0.00899155	0.259288	0.4	0.67	1	3	Pdzd11
0.00900483	1.25704	0.067	0.322	1	3	Zmat1
0.00902068	0.371314	0.067	0.322	1	3	Sdhaf3
0.00911446	0.59149	0.033	0.258	1	3	Eepd1
0.00916245	0.320397	0.1	0.367	1	3	Zdhhc16
0.00918741	0.302169	0.333	0.667	1	3	Rbm28
0.00920805	1.06965	0.033	0.258	1	3	Arsj
0.00921217	0.776927	0.033	0.258	1	3	Rabl2
0.00930578	0.552736	1	0.977	1	3	Rpl36al
0.00932365	0.974115	0.967	0.886	1	3	Cdh2
0.009431	2.24077	0.333	0.148	1	3	Creld1
0.00948097	1.83704	0.367	0.659	1	3	Ccdc127
0.00952495	0.983375	0.1	0.356	1	3	Armcx6
0.00961723	1.72585	0.133	0.405	1	3	Sh3kbp1
0.00964592	0.291172	0.067	0.318	1	3	Yars2
0.00967069	0.432958	0.4	0.705	1	3	Lyrm2
0.00970552	0.655338	0.333	0.625	1	3	Hmbs
0.00975104	1.96574	0.367	0.186	1	3	Apbb1
0.00977799	0.337664	1	1	1	3	Myl6
0.00980551	1.12665	0.8	0.818	1	3	Zmat2
7.59274e-19	2.75657	0.933	0.122	1.06686e-14	4_0	2310040G24Rik
1.28667e-18	3.33869	0.933	0.115	1.80789e-14	4_0	Syt5
1.16749e-17	0.679125	1	0.154	1.64044e-13	4_0	Cytl1
2.27234e-17	3.15775	0.933	0.14	3.19286e-13	4_0	C1s1
3.01479e-17	2.76996	0.933	0.14	4.23608e-13	4_0	Slc12a8
7.12427e-17	1.9893	0.8	0.09	1.00103e-12	4_0	Gsdmd
1.18999e-16	2.85355	0.933	0.136	1.67206e-12	4_0	Ahsg
3.05369e-16	1.6477	1	0.161	4.29074e-12	4_0	Serpina3n
4.17927e-16	3.91289	0.933	0.158	5.87229e-12	4_0	Map6
4.55274e-16	2.31307	1	0.165	6.39705e-12	4_0	Tnfaip8l1
7.30904e-16	1.77593	0.933	0.129	1.02699e-11	4_0	Fancg
9.11798e-16	2.68854	0.867	0.122	1.28117e-11	4_0	Cx3cr1
9.42929e-16	2.12325	0.8	0.104	1.32491e-11	4_0	Fgf7
1.02468e-15	2.81377	0.933	0.143	1.43978e-11	4_0	Nr4a3
1.55738e-15	3.39913	0.933	0.151	2.18827e-11	4_0	Fgf14
1.99726e-15	2.93128	0.8	0.104	2.80635e-11	4_0	4930461G14Rik
2.45263e-15	3.97779	1	0.183	3.44619e-11	4_0	Hrc
2.78203e-15	1.55379	1	0.168	3.90903e-11	4_0	Fam180a
3.60504e-15	2.07619	0.933	0.14	5.06544e-11	4_0	Cp
3.62793e-15	4.88623	0.867	0.129	5.0976e-11	4_0	Acan
4.92484e-15	3.36017	0.867	0.14	6.91989e-11	4_0	Pcdhb14
5.36707e-15	0.870212	1	0.165	7.54127e-11	4_0	Scara5
5.70885e-15	2.69142	0.933	0.158	8.02151e-11	4_0	Hfe
7.1129e-15	3.72812	0.933	0.176	9.99434e-11	4_0	Dgkg
7.12228e-15	1.72115	0.867	0.125	1.00075e-10	4_0	Dbp
8.48405e-15	2.17701	0.933	0.154	1.19209e-10	4_0	Bcam
9.09211e-15	1.69456	0.933	0.158	1.27753e-10	4_0	Igtp
1.03116e-14	2.14377	0.8	0.108	1.44888e-10	4_0	Tktl1
1.37039e-14	1.95734	1	0.172	1.92553e-10	4_0	Pcdh15
1.46995e-14	2.51916	1	0.194	2.06543e-10	4_0	Thsd4
1.54776e-14	1.99352	0.867	0.14	2.17476e-10	4_0	Dusp4
1.58954e-14	1.36214	0.933	0.151	2.23346e-10	4_0	Faap24
1.6186e-14	2.68541	1	0.186	2.27429e-10	4_0	Cyb561
1.72505e-14	3.65145	0.867	0.136	2.42386e-10	4_0	Nrarp
2.17241e-14	0.735506	0.867	0.122	3.05245e-10	4_0	Krt79
2.6624e-14	1.53406	1	0.179	3.74093e-10	4_0	Sele
2.80978e-14	2.68222	0.933	0.161	3.94802e-10	4_0	Cpne8
4.24217e-14	1.76266	1	0.19	5.96067e-10	4_0	Nek2
4.63378e-14	2.28026	1	0.186	6.51092e-10	4_0	Reln
5.34254e-14	1.6755	0.933	0.172	7.50681e-10	4_0	Ephb6
6.924e-14	3.85944	0.867	0.158	9.72891e-10	4_0	Itgbl1
7.72598e-14	2.65825	0.867	0.136	1.08558e-09	4_0	Actr3b
9.44832e-14	2.50391	1	0.197	1.32758e-09	4_0	Svip
1.18117e-13	2.36825	0.867	0.151	1.65966e-09	4_0	Mmrn2
1.3115e-13	2.52877	0.867	0.154	1.84278e-09	4_0	Dapk2
1.38599e-13	1.29387	1	0.183	1.94745e-09	4_0	Egr3
1.38819e-13	1.86296	1	0.201	1.95055e-09	4_0	Tpk1
1.4372e-13	2.46198	0.8	0.122	2.01941e-09	4_0	Gm15713
1.45353e-13	1.71967	0.933	0.176	2.04236e-09	4_0	Usp2
1.5269e-13	3.15605	1	0.208	2.14545e-09	4_0	Olfml2a
1.70664e-13	1.32585	1	0.183	2.39801e-09	4_0	Slc7a5
2.03344e-13	1.23201	0.867	0.14	2.85718e-09	4_0	Spink2
2.05751e-13	2.26373	0.8	0.122	2.89101e-09	4_0	2900005J15Rik
2.12555e-13	2.94129	1	0.204	2.9866e-09	4_0	Entpd1
2.1858e-13	2.81734	0.8	0.129	3.07127e-09	4_0	Cyp26a1
2.25157e-13	2.88539	0.733	0.097	3.16368e-09	4_0	Cxcl2
2.45775e-13	5.26582	0.867	0.154	3.45338e-09	4_0	Cxcl13
2.70415e-13	0.927614	0.8	0.118	3.7996e-09	4_0	Dgat2
3.00277e-13	1.88968	1	0.204	4.21919e-09	4_0	Aldh1a1
3.136e-13	1.10823	0.8	0.115	4.40639e-09	4_0	Clec14a
3.45992e-13	1.55012	0.867	0.14	4.86153e-09	4_0	Fzd5
3.53638e-13	2.08671	0.867	0.158	4.96897e-09	4_0	Wdr25
3.78733e-13	2.70582	0.867	0.154	5.32157e-09	4_0	A430046D13Rik
4.57892e-13	2.02041	0.867	0.133	6.43383e-09	4_0	Tmem100
4.73156e-13	2.87037	0.933	0.186	6.64832e-09	4_0	Slc41a2
4.88533e-13	1.35675	1	0.179	6.86438e-09	4_0	Megf11
5.16753e-13	2.6964	0.733	0.108	7.26089e-09	4_0	Ccl7
5.80775e-13	0.990955	0.8	0.133	8.16047e-09	4_0	A4galt
5.8545e-13	5.12789	0.8	0.129	8.22616e-09	4_0	Olfr78
6.65218e-13	1.77781	0.867	0.143	9.34698e-09	4_0	Ocel1
6.71019e-13	3.29277	0.6	0.061	9.42849e-09	4_0	Lama5
6.7373e-13	1.91663	1	0.208	9.46658e-09	4_0	Maob
6.81419e-13	1.45786	0.933	0.176	9.57462e-09	4_0	Abcd1
7.1803e-13	0.386543	0.867	0.14	1.0089e-08	4_0	Chl1
7.19271e-13	1.98354	0.933	0.172	1.01065e-08	4_0	Tbccd1
7.27212e-13	1.28891	0.867	0.143	1.02181e-08	4_0	Fam167a
7.98762e-13	1.38172	0.533	0.047	1.12234e-08	4_0	D630033O11Rik
9.20864e-13	1.84615	0.8	0.125	1.29391e-08	4_0	Il1rl2
9.83357e-13	3.11926	0.733	0.108	1.38172e-08	4_0	Abcc8
1.01105e-12	1.98918	1	0.204	1.42063e-08	4_0	Cxcl1
1.0645e-12	3.41221	1	0.251	1.49573e-08	4_0	Gm13889
1.08216e-12	2.49105	0.6	0.068	1.52054e-08	4_0	1700019L03Rik
1.52618e-12	2.25492	0.933	0.176	2.14444e-08	4_0	Npy1r
1.54719e-12	1.75167	1	0.229	2.17396e-08	4_0	H2-D1
1.6751e-12	2.67692	1	0.222	2.35369e-08	4_0	Ptcd1
1.77043e-12	3.85909	0.667	0.086	2.48763e-08	4_0	Srpk3
2.00463e-12	0.67386	0.8	0.122	2.81671e-08	4_0	Col7a1
2.17108e-12	2.9778	0.733	0.108	3.05058e-08	4_0	Smoc1
2.34786e-12	1.58829	0.733	0.111	3.29898e-08	4_0	Cfap45
2.58238e-12	2.33702	1	0.208	3.62851e-08	4_0	Ch25h
2.96754e-12	1.86084	0.867	0.165	4.16969e-08	4_0	Vwa1
3.21803e-12	1.41579	0.867	0.168	4.52166e-08	4_0	Ccdc3
3.26061e-12	1.44279	0.733	0.111	4.58149e-08	4_0	Eya1
3.32398e-12	0.650884	0.333	0.014	4.67053e-08	4_0	A930019D19Rik
4.28887e-12	2.09524	1	0.219	6.02629e-08	4_0	Cfh
4.53902e-12	0.38808	1	0.204	6.37778e-08	4_0	Oma1
5.28113e-12	1.84417	0.8	0.136	7.42051e-08	4_0	Sult1a1
5.3886e-12	2.04847	0.8	0.136	7.57153e-08	4_0	Rpp25
5.45798e-12	0.332366	0.267	0.007	7.66901e-08	4_0	Pom121l2
5.53637e-12	1.3316	0.867	0.143	7.77915e-08	4_0	Pik3cb
5.55235e-12	1.29969	0.933	0.183	7.80161e-08	4_0	Dlgap1
5.62453e-12	3.46611	0.8	0.154	7.90303e-08	4_0	Gp1ba
5.78784e-12	1.59784	0.933	0.201	8.13249e-08	4_0	Lcmt2
6.13012e-12	2.57063	0.733	0.115	8.61343e-08	4_0	Bdh1
7.03388e-12	2.31359	0.733	0.108	9.8833e-08	4_0	Tmem143
7.53491e-12	0.926854	0.8	0.151	1.05873e-07	4_0	Adap1
7.5477e-12	1.24307	1	0.219	1.06053e-07	4_0	Lrrtm2
7.64062e-12	0.936274	0.667	0.086	1.07358e-07	4_0	Efcab5
8.46551e-12	2.82146	0.933	0.186	1.18949e-07	4_0	Mdga1
8.59834e-12	1.15034	0.8	0.136	1.20815e-07	4_0	Zfr2
8.94458e-12	1.25787	0.867	0.158	1.2568e-07	4_0	Calhm2
9.16843e-12	1.24219	0.867	0.158	1.28826e-07	4_0	Lrig1
9.19914e-12	1.38865	0.933	0.201	1.29257e-07	4_0	Ccdc126
1.01172e-11	2.52072	0.8	0.147	1.42157e-07	4_0	Gper1
1.03421e-11	1.58026	1	0.211	1.45317e-07	4_0	Coq4
1.04272e-11	1.19441	1	0.229	1.46512e-07	4_0	Zfp2
1.07862e-11	1.60697	0.933	0.194	1.51556e-07	4_0	Lactb2
1.12841e-11	1.04756	1	0.229	1.58552e-07	4_0	Scube2
1.27088e-11	2.63	0.933	0.208	1.78571e-07	4_0	Fgl2
1.34769e-11	1.32336	0.933	0.204	1.89364e-07	4_0	Serac1
1.35193e-11	1.35167	0.8	0.14	1.89959e-07	4_0	Tesk2
1.65365e-11	1.19917	1	0.226	2.32355e-07	4_0	9130008F23Rik
1.67991e-11	2.37349	0.667	0.104	2.36044e-07	4_0	Arl14
1.78047e-11	3.45222	0.867	0.172	2.50174e-07	4_0	Mafk
1.82843e-11	1.33196	0.933	0.19	2.56912e-07	4_0	Mtap7d3
1.85758e-11	1.15819	1	0.251	2.61009e-07	4_0	Rps6kc1
1.861e-11	1.69961	0.933	0.197	2.61489e-07	4_0	Zxdc
1.86756e-11	1.51535	0.733	0.122	2.62411e-07	4_0	1700086L19Rik
1.89049e-11	5.29538	0.8	0.143	2.65632e-07	4_0	Map3k8
1.92615e-11	0.482778	0.8	0.14	2.70644e-07	4_0	Prtg
1.9712e-11	2.74142	0.867	0.179	2.76974e-07	4_0	Rnd1
2.03009e-11	1.45067	1	0.219	2.85248e-07	4_0	Fam19a5
2.0524e-11	1.53808	1	0.215	2.88382e-07	4_0	Cyb561d2
2.05543e-11	1.31643	1	0.222	2.88808e-07	4_0	Qrsl1
2.13997e-11	2.13999	0.6	0.079	3.00687e-07	4_0	Pacrg
2.15333e-11	1.2352	1	0.233	3.02565e-07	4_0	Kcnt2
2.26005e-11	1.50522	0.8	0.143	3.17559e-07	4_0	Cidea
2.30781e-11	1.73036	0.867	0.186	3.24271e-07	4_0	Btbd6
2.43926e-11	2.96374	0.533	0.061	3.4274e-07	4_0	Il16
2.5269e-11	0.975947	0.8	0.136	3.55055e-07	4_0	Batf
2.74078e-11	0.791599	0.933	0.197	3.85107e-07	4_0	Csf1
2.8404e-11	1.62859	0.733	0.118	3.99105e-07	4_0	9930012K11Rik
2.90111e-11	0.321326	0.867	0.168	4.07634e-07	4_0	Npy
2.91643e-11	0.583133	0.733	0.104	4.09788e-07	4_0	Has2os
2.92181e-11	1.36949	0.8	0.147	4.10544e-07	4_0	Bmp5
3.04854e-11	2.80756	0.467	0.039	4.28351e-07	4_0	Ecscr
3.28501e-11	1.47268	0.933	0.197	4.61577e-07	4_0	Eepd1
3.41896e-11	0.959214	0.933	0.197	4.80398e-07	4_0	Fkbpl
3.54202e-11	3.07571	0.8	0.154	4.97689e-07	4_0	Kdm8
3.61831e-11	2.4391	0.733	0.129	5.08408e-07	4_0	Chdh
4.00362e-11	1.95308	1	0.24	5.62549e-07	4_0	Hspb2
4.02565e-11	1.16853	0.933	0.201	5.65644e-07	4_0	Ccsap
4.07561e-11	2.48435	0.8	0.151	5.72665e-07	4_0	Fabp4
4.07997e-11	1.61232	0.933	0.197	5.73276e-07	4_0	Pm20d2
4.35865e-11	1.78427	0.933	0.208	6.12433e-07	4_0	Krt1
4.44465e-11	1.19604	0.933	0.208	6.24518e-07	4_0	Adamts17
4.44764e-11	2.45509	0.933	0.219	6.24938e-07	4_0	Osmr
4.45543e-11	2.35567	0.867	0.186	6.26032e-07	4_0	1810062G17Rik
4.51528e-11	1.98457	1	0.24	6.34442e-07	4_0	Atp8b1
4.65359e-11	1.4734	0.933	0.197	6.53875e-07	4_0	Tbc1d25
4.65567e-11	2.3914	0.933	0.211	6.54168e-07	4_0	4930523C07Rik
4.66625e-11	2.51964	0.533	0.061	6.55655e-07	4_0	Dgkb
4.8596e-11	2.50737	0.933	0.237	6.82822e-07	4_0	Myh11
4.90112e-11	0.651981	1	0.211	6.88657e-07	4_0	Cenpo
5.00315e-11	1.36844	0.733	0.118	7.02992e-07	4_0	Tnnt3
5.06628e-11	1.90712	1	0.251	7.11862e-07	4_0	Ubiad1
5.32851e-11	0.383669	1	0.222	7.48709e-07	4_0	Xxylt1
5.37959e-11	1.54981	0.8	0.143	7.55887e-07	4_0	Cys1
5.46011e-11	1.1777	0.733	0.125	7.67199e-07	4_0	Prodh
5.5966e-11	2.95963	0.733	0.129	7.86378e-07	4_0	Aoc3
5.69052e-11	2.262	0.467	0.043	7.99575e-07	4_0	Efhd1
5.78784e-11	1.95983	0.933	0.215	8.1325e-07	4_0	2022-09-04
5.95029e-11	2.08571	0.8	0.158	8.36076e-07	4_0	Elmo1
6.41219e-11	2.42551	0.667	0.111	9.00977e-07	4_0	Cxcl3
6.92794e-11	0.885214	0.8	0.147	9.73444e-07	4_0	Cmtm5
7.13984e-11	0.53285	0.867	0.165	1.00322e-06	4_0	Eogt
7.29011e-11	2.09253	0.533	0.061	1.02433e-06	4_0	Crygs
7.57651e-11	2.16034	0.867	0.165	1.06458e-06	4_0	Cldn3
8.30605e-11	1.64066	0.867	0.176	1.16708e-06	4_0	Slc27a6
9.23771e-11	0.808839	0.733	0.125	1.29799e-06	4_0	Fam217b
9.65837e-11	1.28169	0.733	0.129	1.3571e-06	4_0	Pcdhga8
1.0193e-10	1.20715	0.8	0.154	1.43222e-06	4_0	Rasip1
1.0353e-10	1.93512	0.867	0.194	1.4547e-06	4_0	C1galt1
1.03753e-10	1.86359	0.6	0.086	1.45783e-06	4_0	Gimap4
1.05074e-10	0.48825	0.667	0.1	1.4764e-06	4_0	Hlf
1.22441e-10	2.23718	0.8	0.147	1.72042e-06	4_0	Foxs1
1.23735e-10	2.34398	0.933	0.237	1.73861e-06	4_0	C330006A16Rik
1.26189e-10	2.93803	0.6	0.082	1.77308e-06	4_0	Klf8
1.28212e-10	1.0417	1	0.24	1.80151e-06	4_0	Lrrc20
1.29432e-10	2.04114	1	0.265	1.81864e-06	4_0	Fam83d
1.33415e-10	0.775965	0.8	0.165	1.87461e-06	4_0	Ly96
1.39514e-10	1.55677	0.8	0.154	1.96031e-06	4_0	Ube2cbp
1.44241e-10	3.95438	0.933	0.24	2.02674e-06	4_0	Mylk
1.44568e-10	0.500199	0.933	0.197	2.03132e-06	4_0	Rgs10
1.51902e-10	2.44925	0.8	0.172	2.13437e-06	4_0	Apc2
1.59295e-10	2.24636	0.933	0.226	2.23825e-06	4_0	Tasp1
1.66621e-10	1.05988	0.533	0.065	2.34119e-06	4_0	Hbb-y
1.75493e-10	0.433687	0.933	0.208	2.46586e-06	4_0	Asb13
1.78379e-10	1.45396	1	0.24	2.50641e-06	4_0	Pgf
1.93263e-10	0.688709	0.867	0.168	2.71554e-06	4_0	Fchsd1
2.01761e-10	2.01812	0.867	0.179	2.83494e-06	4_0	Mob3b
2.04453e-10	1.52284	0.733	0.122	2.87277e-06	4_0	Cecr5
2.04553e-10	1.39272	1	0.276	2.87418e-06	4_0	Corin
2.05584e-10	2.26347	0.933	0.226	2.88866e-06	4_0	Itga11
2.0659e-10	1.30328	1	0.244	2.90279e-06	4_0	Dusp10
2.14758e-10	2.39954	0.667	0.111	3.01756e-06	4_0	Tlr4
2.35179e-10	2.20316	0.8	0.165	3.3045e-06	4_0	Polh
2.38398e-10	0.903781	0.6	0.079	3.34974e-06	4_0	Lgr6
2.48123e-10	1.02484	0.8	0.158	3.48638e-06	4_0	Cerk
2.50559e-10	1.14905	1	0.233	3.5206e-06	4_0	C1qtnf7
2.51468e-10	1.18775	0.733	0.133	3.53338e-06	4_0	Prg4
2.51506e-10	0.999451	1	0.24	3.53391e-06	4_0	Rcan3
2.68302e-10	0.414791	0.267	0.011	3.76991e-06	4_0	Fgf2
2.72782e-10	1.75912	0.733	0.147	3.83287e-06	4_0	Xirp1
2.84937e-10	1.28254	0.933	0.219	4.00364e-06	4_0	Lmbr1
2.87335e-10	0.641249	0.867	0.172	4.03734e-06	4_0	Oxld1
2.94681e-10	0.678297	1	0.233	4.14057e-06	4_0	Ubtd1
2.96545e-10	0.386187	0.867	0.179	4.16675e-06	4_0	D6Wsu163e
3.00997e-10	1.50299	0.733	0.136	4.22931e-06	4_0	Afmid
3.11416e-10	2.57774	0.733	0.151	4.3757e-06	4_0	Gngt2
3.149e-10	1.90368	0.733	0.14	4.42466e-06	4_0	Ranbp17
3.20188e-10	2.50865	1	0.344	4.49896e-06	4_0	Epas1
3.24452e-10	1.65652	0.8	0.158	4.55887e-06	4_0	Pla2g5
3.25577e-10	0.591133	0.8	0.161	4.57468e-06	4_0	Pla2g7
3.29671e-10	3.2662	0.8	0.176	4.63221e-06	4_0	BC065397
3.58604e-10	2.49166	0.667	0.111	5.03874e-06	4_0	Cemip
3.72938e-10	2.38073	0.867	0.194	5.24015e-06	4_0	Wars2
4.02989e-10	1.69289	0.6	0.086	5.6624e-06	4_0	Panx3
4.13155e-10	1.84833	0.533	0.065	5.80524e-06	4_0	Crybb3
4.19356e-10	1.87188	1	0.269	5.89237e-06	4_0	1500015O10Rik
5.34553e-10	0.284345	0.667	0.108	7.511e-06	4_0	Gm16907
5.38563e-10	0.535592	0.933	0.208	7.56735e-06	4_0	Chac2
5.40817e-10	1.09051	0.933	0.226	7.59902e-06	4_0	Wrap53
5.93889e-10	0.779207	0.867	0.183	8.34473e-06	4_0	Mast3
5.96612e-10	1.12923	0.667	0.115	8.383e-06	4_0	Cd74
5.96815e-10	3.07295	0.733	0.151	8.38585e-06	4_0	Pygm
6.27076e-10	0.712066	0.8	0.165	8.81104e-06	4_0	A730017C20Rik
6.38715e-10	2.04966	0.733	0.151	8.97458e-06	4_0	Grp
6.75969e-10	1.54673	1	0.262	9.49804e-06	4_0	Ndrg1
7.17079e-10	1.33578	0.933	0.237	1.00757e-05	4_0	B3gnt2
7.67927e-10	0.527932	0.933	0.222	1.07901e-05	4_0	Cep41
7.80161e-10	4.03495	0.867	0.215	1.0962e-05	4_0	Ramp1
7.81053e-10	0.748072	0.933	0.215	1.09746e-05	4_0	Ccdc134
7.85777e-10	1.24263	1	0.272	1.1041e-05	4_0	Kif18a
7.95594e-10	1.30864	0.933	0.226	1.11789e-05	4_0	Tfb1m
8.2278e-10	2.1754	1	0.297	1.15609e-05	4_0	Ptprz1
8.35915e-10	3.05541	0.667	0.118	1.17454e-05	4_0	Zfp473
8.53473e-10	1.13739	0.867	0.201	1.19921e-05	4_0	Arsj
9.07076e-10	0.607726	0.467	0.05	1.27453e-05	4_0	Alpk2
9.37925e-10	1.61499	0.667	0.118	1.31788e-05	4_0	Adh1
9.57522e-10	1.51139	0.667	0.1	1.34541e-05	4_0	Fam20a
9.73982e-10	1.40309	0.867	0.19	1.36854e-05	4_0	AI414108
9.77726e-10	1.05923	0.867	0.204	1.3738e-05	4_0	Bloc1s3
1.00903e-09	0.607467	1	0.28	1.41779e-05	4_0	Pi15
1.01226e-09	0.75829	0.867	0.201	1.42232e-05	4_0	Agfg2
1.01751e-09	0.402065	0.933	0.222	1.4297e-05	4_0	Slc16a6
1.13179e-09	1.37785	1	0.258	1.59028e-05	4_0	Wbscr16
1.15545e-09	2.61591	0.933	0.254	1.62352e-05	4_0	Slc33a1
1.18854e-09	2.44484	0.867	0.197	1.67002e-05	4_0	Ace
1.20521e-09	2.37825	0.933	0.244	1.69343e-05	4_0	Ntf3
1.20696e-09	1.26614	0.8	0.176	1.6959e-05	4_0	Zfp775
1.23869e-09	0.628266	0.4	0.036	1.74048e-05	4_0	Cyct
1.31934e-09	1.03462	0.8	0.176	1.85381e-05	4_0	Intu
1.40826e-09	2.40315	1	0.308	1.97874e-05	4_0	Prelp
1.42333e-09	2.3647	0.6	0.093	1.99992e-05	4_0	6430548M08Rik
1.43267e-09	1.39629	0.667	0.118	2.01304e-05	4_0	Vpreb1
1.46985e-09	1.44254	0.733	0.158	2.06528e-05	4_0	Insc
1.50368e-09	0.82999	0.733	0.133	2.11281e-05	4_0	Nmi
1.61141e-09	1.30563	1	0.29	2.26419e-05	4_0	Ftsj1
1.66624e-09	1.76228	0.667	0.122	2.34123e-05	4_0	Cck
1.68312e-09	1.01429	0.867	0.201	2.36495e-05	4_0	Ifit2
1.84951e-09	0.315502	0.667	0.115	2.59875e-05	4_0	Ppp1r3g
1.84989e-09	2.75251	0.667	0.118	2.59928e-05	4_0	Lin7a
1.88805e-09	1.41874	0.667	0.115	2.6529e-05	4_0	Ldlrad2
1.91877e-09	2.14788	0.667	0.129	2.69606e-05	4_0	Akr1c12
1.9875e-09	1.67674	0.933	0.229	2.79264e-05	4_0	Pomk
2.00831e-09	1.43318	0.933	0.237	2.82188e-05	4_0	Fam26e
2.10612e-09	0.328888	0.733	0.14	2.95931e-05	4_0	Serpinb1a
2.1238e-09	0.278631	0.867	0.194	2.98415e-05	4_0	Grk4
2.23768e-09	1.26028	0.933	0.226	3.14416e-05	4_0	Fkbp15
2.27042e-09	2.29123	0.4	0.039	3.19017e-05	4_0	1700109G14Rik
2.4792e-09	0.990575	0.933	0.229	3.48352e-05	4_0	Mthfr
2.54175e-09	2.57387	0.867	0.237	3.57141e-05	4_0	Atxn7l2
2.90975e-09	0.92299	0.667	0.118	4.08849e-05	4_0	Gprin3
3.025e-09	0.385175	1	0.244	4.25043e-05	4_0	Acer2
3.20111e-09	1.67174	1	0.283	4.49789e-05	4_0	Plac9b
3.28356e-09	1.02533	0.933	0.219	4.61373e-05	4_0	Spsb2
3.31662e-09	1.32587	0.933	0.226	4.66018e-05	4_0	Stard13
3.53506e-09	2.59019	0.8	0.176	4.96712e-05	4_0	R74862
3.60603e-09	1.35953	0.8	0.179	5.06683e-05	4_0	Pik3c2b
3.70238e-09	0.505126	1	0.247	5.20222e-05	4_0	Zbtb43
3.85627e-09	2.1539	0.467	0.057	5.41845e-05	4_0	Wnt3
3.86041e-09	2.01736	0.733	0.154	5.42426e-05	4_0	Peli2
3.94061e-09	0.965512	0.933	0.222	5.53695e-05	4_0	Ctsc
3.97449e-09	1.98607	0.6	0.104	5.58456e-05	4_0	Prss27
4.01356e-09	1.32205	1	0.283	5.63946e-05	4_0	Cdkn1a
4.05143e-09	3.01967	0.8	0.197	5.69266e-05	4_0	Birc3
4.16295e-09	0.43895	0.867	0.186	5.84936e-05	4_0	Rdh11
4.18005e-09	0.53477	1	0.283	5.87339e-05	4_0	Taf4a
4.21082e-09	0.828675	0.733	0.147	5.91663e-05	4_0	Bcdin3d
4.22656e-09	0.471937	0.667	0.118	5.93873e-05	4_0	Ctf1
4.28692e-09	1.59367	1	0.305	6.02355e-05	4_0	Eral1
4.35919e-09	2.12242	0.867	0.226	6.1251e-05	4_0	Gstk1
4.41711e-09	2.45484	0.733	0.147	6.20648e-05	4_0	Zfand4
4.46328e-09	1.52277	0.333	0.025	6.27136e-05	4_0	Cpa2
4.47047e-09	0.661014	0.867	0.204	6.28145e-05	4_0	Zfp850
4.54907e-09	5.08131	0.267	0.014	6.3919e-05	4_0	Cytip
4.7644e-09	0.469732	0.533	0.079	6.69447e-05	4_0	Apol6
4.83309e-09	1.48529	1	0.294	6.79098e-05	4_0	Tpmt
4.94392e-09	2.20918	0.667	0.129	6.94671e-05	4_0	Efhb
4.94559e-09	1.26698	0.467	0.057	6.94905e-05	4_0	Dok1
4.99779e-09	3.17471	1	0.319	7.02239e-05	4_0	Nupr1
5.07572e-09	1.08182	0.867	0.201	7.1319e-05	4_0	Pawr
5.32957e-09	1.24901	0.667	0.122	7.48858e-05	4_0	9230114K14Rik
5.42998e-09	0.618396	0.867	0.219	7.62967e-05	4_0	Zfp408
5.44268e-09	0.729452	0.733	0.147	7.64752e-05	4_0	Zscan18
5.4686e-09	0.361277	0.8	0.176	7.68394e-05	4_0	Zfp691
5.53066e-09	2.60466	0.667	0.136	7.77113e-05	4_0	Gpr182
5.64612e-09	1.18023	0.733	0.14	7.93337e-05	4_0	D2hgdh
5.69934e-09	2.97697	0.6	0.115	8.00814e-05	4_0	Trp63
5.71851e-09	2.46597	1	0.33	8.03507e-05	4_0	Stom
5.7247e-09	3.08789	1	0.814	8.04377e-05	4_0	Eln
5.85436e-09	1.62055	0.733	0.158	8.22596e-05	4_0	Klhdc9
5.85497e-09	1.13506	0.933	0.265	8.22681e-05	4_0	Slc35a5
5.93635e-09	1.38634	0.8	0.179	8.34116e-05	4_0	Mocs1
5.9953e-09	0.499417	0.933	0.229	8.42399e-05	4_0	Cep135
6.54248e-09	1.29296	0.467	0.057	9.19284e-05	4_0	Ceacam1
6.58665e-09	1.43037	0.933	0.247	9.2549e-05	4_0	Adck1
6.60625e-09	1.07836	0.933	0.237	9.28245e-05	4_0	Prkd1
6.96959e-09	0.642322	0.6	0.1	9.79297e-05	4_0	Ficd
7.03924e-09	1.34739	0.667	0.133	9.89083e-05	4_0	Gm12992
7.1296e-09	0.530444	1	0.283	0.000100178	4_0	Vwa5a
7.27444e-09	0.827508	0.867	0.219	0.000102213	4_0	Prps2
7.29272e-09	4.98259	0.667	0.125	0.00010247	4_0	Mustn1
7.29522e-09	0.497967	0.733	0.129	0.000102505	4_0	Tkfc
7.31768e-09	0.913719	0.8	0.194	0.000102821	4_0	Pecam1
7.43271e-09	2.0156	0.8	0.208	0.000104437	4_0	Tex2
7.52672e-09	0.752108	0.933	0.226	0.000105758	4_0	Ppp3cc
7.75259e-09	1.99134	1	0.312	0.000108932	4_0	Ehd2
9.13093e-09	1.62711	1	0.301	0.000128299	4_0	Olfml1
9.58312e-09	0.267103	0.867	0.211	0.000134652	4_0	Mturn
9.69038e-09	2.21069	0.933	0.251	0.00013616	4_0	Zc3h12c
9.77594e-09	1.73365	0.667	0.14	0.000137362	4_0	Crym
1.00006e-08	1.45035	0.733	0.154	0.000140518	4_0	Wdfy2
1.00606e-08	0.704853	1	0.283	0.000141362	4_0	Ppm1d
1.03955e-08	0.411298	0.933	0.251	0.000146068	4_0	Cenpl
1.06859e-08	1.08298	1	0.319	0.000150148	4_0	Nov
1.07433e-08	1.56224	0.933	0.258	0.000150955	4_0	Ndufa4l2
1.07691e-08	1.09681	1	0.294	0.000151316	4_0	Pon3
1.08897e-08	1.44699	0.933	0.254	0.000153012	4_0	Lrrc28
1.098e-08	0.701681	1	0.28	0.00015428	4_0	Stc1
1.1065e-08	1.79208	0.933	0.24	0.000155474	4_0	Ablim1
1.16039e-08	1.56242	0.933	0.258	0.000163047	4_0	Trabd2b
1.18598e-08	0.319246	1	0.283	0.000166642	4_0	Coasy
1.22132e-08	1.46396	0.467	0.061	0.000171608	4_0	Itga7
1.24779e-08	2.9717	0.8	0.194	0.000175326	4_0	Myom1
1.26917e-08	2.99774	0.933	0.258	0.000178331	4_0	Atp1b2
1.31138e-08	2.16676	0.6	0.1	0.000184262	4_0	Adamtsl3
1.32674e-08	1.37735	0.933	0.247	0.00018642	4_0	Ino80c
1.32775e-08	0.89686	0.8	0.179	0.000186562	4_0	Prr5
1.34171e-08	1.09524	0.333	0.029	0.000188523	4_0	Neto1
1.35285e-08	1.04778	1	0.294	0.000190089	4_0	Plk1
1.35553e-08	0.325261	1	0.258	0.000190466	4_0	Hagh
1.36683e-08	0.580937	0.867	0.201	0.000192053	4_0	Rbfa
1.37199e-08	0.86966	0.933	0.244	0.000192778	4_0	Rerg
1.43282e-08	0.757799	0.4	0.043	0.000201325	4_0	4930432J09Rik
[truncated: 6,789 more rows]
