# Supplementary material for: Cardiac neural crest lineage diversity and underlying gene regulatory networks revealed by multimodal analysis
Source: Research Square preprint supplement (doi:10.21203/rs.3.rs-1756528/v1), 2022-06-24
Supplement: Supplementary file 2 [file SupplementaryData3.xlsx]

## Sheet: intC_metadata
	orig.ident	nCount_RNA	nFeature_RNA	stage	cell	percent.mt	S.Score	G2M.Score	Phase	old.ident	nCount_SCT	nFeature_SCT	SCT_snn_res.1	seurat_clusters	sub.cluster	integration	method	sub.cluster.Fluidigm	nCount_ATAC	nFeature_ATAC	nCount_spliced	nFeature_spliced	nCount_unspliced	nFeature_unspliced	nCount_ambiguous	nFeature_ambiguous	nucleosome_signal	nucleosome_percentile	TSS.enrichment	TSS.percentile	SCT.weight	ATAC.weight	wsnn_res.1	sub.cluster.10x	integrated_snn_res.0.5
C101	4	1151575	8736	E17.5	C101	0.034267	-69.9331	-107.177	G1	Seuratcds	1203654	8731	4	3	4_1	C1_4_1	Fluidigm	4_1	NA	NA	NA	NA	NA	NA	NA	NA	NA	NA	NA	NA	NA	NA	NA	NA	3
C103	7	2609182	8299	E17.5	C103	0.0174875	-93.346	1303	G2M	Seuratcds	1207658	7183	7	3	7	C1_7	Fluidigm	7	NA	NA	NA	NA	NA	NA	NA	NA	NA	NA	NA	NA	NA	NA	NA	NA	3
C108	10	2694096	7983	E17.5	C108	0.0237	-171.179	-284.166	G1	Seuratcds	1213760	6719	10	1	10	C1_10	Fluidigm	10	NA	NA	NA	NA	NA	NA	NA	NA	NA	NA	NA	NA	NA	NA	NA	NA	1
C110	11	1558790	7730	E17.5	C110	0.0316085	-61.504	-174.169	G1	Seuratcds	1204207	7710	11	7	11	C1_11	Fluidigm	11	NA	NA	NA	NA	NA	NA	NA	NA	NA	NA	NA	NA	NA	NA	NA	NA	7
C112	9	1570080	7858	E17.5	C112	0.0240223	-62.1629	-47.8651	G1	Seuratcds	1207226	7839	9	3	9	C1_9	Fluidigm	9	NA	NA	NA	NA	NA	NA	NA	NA	NA	NA	NA	NA	NA	NA	NA	NA	3
C116	11	1468434	7745	E17.5	C116	0.0341663	-78.8366	-174.72	G1	Seuratcds	1203992	7724	11	7	11	C1_11	Fluidigm	11	NA	NA	NA	NA	NA	NA	NA	NA	NA	NA	NA	NA	NA	NA	NA	NA	7
C118	2	1533087	8076	E17.5	C118	0.0267154	-57.2508	-170.42	G1	Seuratcds	1206414	8052	2	6	2_1	C1_2_1	Fluidigm	2_1	NA	NA	NA	NA	NA	NA	NA	NA	NA	NA	NA	NA	NA	NA	NA	NA	6
C119	4	172593	6546	E17.5	C119	0.0335993	-3.98882	-14.2059	G1	Seuratcds	1182785	6644	4	1	4_0	C1_4_0	Fluidigm	4_0	NA	NA	NA	NA	NA	NA	NA	NA	NA	NA	NA	NA	NA	NA	NA	NA	1
C120	7	1707957	7638	E17.5	C120	0.0357351	-44.0842	59.6388	G2M	Seuratcds	1206332	7620	7	4	7	C1_7	Fluidigm	7	NA	NA	NA	NA	NA	NA	NA	NA	NA	NA	NA	NA	NA	NA	NA	NA	4
C121	7	1895457	7223	E17.5	C121	0.0291159	-102.328	-207.48	G1	Seuratcds	1207212	7208	7	4	7	C1_7	Fluidigm	7	NA	NA	NA	NA	NA	NA	NA	NA	NA	NA	NA	NA	NA	NA	NA	NA	4
C122	4	152731	6998	E17.5	C122	0.0658151	-7.43984	-12.4105	G1	Seuratcds	1159895	7085	4	1	4_0	C1_4_0	Fluidigm	4_0	NA	NA	NA	NA	NA	NA	NA	NA	NA	NA	NA	NA	NA	NA	NA	NA	1
C124	7	1685188	7809	E17.5	C124	0.034408	-139.478	-154.455	G1	Seuratcds	1204256	7800	7	3	7	C1_7	Fluidigm	7	NA	NA	NA	NA	NA	NA	NA	NA	NA	NA	NA	NA	NA	NA	NA	NA	3
C125	7	2285243	7718	E17.5	C125	0.0254489	-78.7404	749.464	G2M	Seuratcds	1209399	7638	7	3	7	C1_7	Fluidigm	7	NA	NA	NA	NA	NA	NA	NA	NA	NA	NA	NA	NA	NA	NA	NA	NA	3
C126	9	1871028	8184	E17.5	C126	0.020981	-174.695	-171.947	G1	Seuratcds	1216029	8170	9	2	9	C1_9	Fluidigm	9	NA	NA	NA	NA	NA	NA	NA	NA	NA	NA	NA	NA	NA	NA	NA	NA	2
C128	7	2140413	7905	E17.5	C128	0.0317289	375.46	77.9591	S	Seuratcds	1207470	7874	7	3	7	C1_7	Fluidigm	7	NA	NA	NA	NA	NA	NA	NA	NA	NA	NA	NA	NA	NA	NA	NA	NA	3
C129	7	1932485	7794	E17.5	C129	0.0197031	-154.68	-245.254	G1	Seuratcds	1209499	7779	7	3	7	C1_7	Fluidigm	7	NA	NA	NA	NA	NA	NA	NA	NA	NA	NA	NA	NA	NA	NA	NA	NA	3
C130	2	2217460	8031	E17.5	C130	0.025278	-146.001	-284.801	G1	Seuratcds	1207070	7997	2	6	2_0	C1_2_0	Fluidigm	2_0	NA	NA	NA	NA	NA	NA	NA	NA	NA	NA	NA	NA	NA	NA	NA	NA	6
C131	7	2327160	7844	E17.5	C131	0.0240473	-143.052	-262.623	G1	Seuratcds	1210090	7494	7	3	7	C1_7	Fluidigm	7	NA	NA	NA	NA	NA	NA	NA	NA	NA	NA	NA	NA	NA	NA	NA	NA	3
C132	9	1928051	8163	E17.5	C132	0.0224792	-226.712	-194.094	G1	Seuratcds	1214089	8137	9	2	9	C1_9	Fluidigm	9	NA	NA	NA	NA	NA	NA	NA	NA	NA	NA	NA	NA	NA	NA	NA	NA	2
C133	9	1701745	7427	E17.5	C133	0.0181543	-124.738	-202.434	G1	Seuratcds	1207633	7412	9	2	9	C1_9	Fluidigm	9	NA	NA	NA	NA	NA	NA	NA	NA	NA	NA	NA	NA	NA	NA	NA	NA	2
C134	7	1681730	7538	E17.5	C134	0.035586	-12.6831	-174.027	G1	Seuratcds	1205739	7524	7	3	7	C1_7	Fluidigm	7	NA	NA	NA	NA	NA	NA	NA	NA	NA	NA	NA	NA	NA	NA	NA	NA	3
C135	9	1732575	7354	E17.5	C135	0.0243528	-170.683	-212.632	G1	Seuratcds	1209364	7332	9	2	9	C1_9	Fluidigm	9	NA	NA	NA	NA	NA	NA	NA	NA	NA	NA	NA	NA	NA	NA	NA	NA	2
C136	4	1033946	7975	E17.5	C136	0.0375813	-76.2819	-94.2532	G1	Seuratcds	1202248	7969	4	1	4_0	C1_4_0	Fluidigm	4_0	NA	NA	NA	NA	NA	NA	NA	NA	NA	NA	NA	NA	NA	NA	NA	NA	1
C139	10	1582205	6690	E17.5	C139	0.026324	-94.7948	-154.691	G1	Seuratcds	1208092	6687	10	1	10	C1_10	Fluidigm	10	NA	NA	NA	NA	NA	NA	NA	NA	NA	NA	NA	NA	NA	NA	NA	NA	1
C141	4	1239380	7241	E17.5	C141	0.0239967	-69.9409	-145.226	G1	Seuratcds	1204560	7231	4	1	4_0	C1_4_0	Fluidigm	4_0	NA	NA	NA	NA	NA	NA	NA	NA	NA	NA	NA	NA	NA	NA	NA	NA	1
C142	7	1484602	7691	E17.5	C142	0.0389734	-99.3625	-186.378	G1	Seuratcds	1206004	7682	7	3	7	C1_7	Fluidigm	7	NA	NA	NA	NA	NA	NA	NA	NA	NA	NA	NA	NA	NA	NA	NA	NA	3
C143	4	502012	8412	E17.5	C143	0.0197585	-43.6714	23.8848	G2M	Seuratcds	1180646	8406	4	5	4_1	C1_4_1	Fluidigm	4_1	NA	NA	NA	NA	NA	NA	NA	NA	NA	NA	NA	NA	NA	NA	NA	NA	5
C144	2	793334	7651	E17.5	C144	0.0292966	-38.6804	-85.9335	G1	Seuratcds	1203203	7647	2	3	2_0	C1_2_0	Fluidigm	2_0	NA	NA	NA	NA	NA	NA	NA	NA	NA	NA	NA	NA	NA	NA	NA	NA	3
C146	4	276107	8805	E17.5	C146	0.0260008	-7.91133	-10.3119	G1	Seuratcds	1191690	8802	4	3	4_0	C1_4_0	Fluidigm	4_0	NA	NA	NA	NA	NA	NA	NA	NA	NA	NA	NA	NA	NA	NA	NA	NA	3
C147	4	170463	8158	E17.5	C147	0.024586	-4.29971	-7.58132	G1	Seuratcds	1190704	8177	4	3	4_0	C1_4_0	Fluidigm	4_0	NA	NA	NA	NA	NA	NA	NA	NA	NA	NA	NA	NA	NA	NA	NA	NA	3
C148	4	258011	8496	E17.5	C148	0.0380255	-7.61299	-14.3362	G1	Seuratcds	1193420	8492	4	3	4_0	C1_4_0	Fluidigm	4_0	NA	NA	NA	NA	NA	NA	NA	NA	NA	NA	NA	NA	NA	NA	NA	NA	3
C150	4	1420080	8238	E17.5	C150	0.0242585	-81.9636	-143.446	G1	Seuratcds	1205107	8226	4	3	4_1	C1_4_1	Fluidigm	4_1	NA	NA	NA	NA	NA	NA	NA	NA	NA	NA	NA	NA	NA	NA	NA	NA	3
C154	10	2044269	7528	E17.5	C154	0.0224706	-58.2701	-179.24	G1	Seuratcds	1207844	7511	10	1	10	C1_10	Fluidigm	10	NA	NA	NA	NA	NA	NA	NA	NA	NA	NA	NA	NA	NA	NA	NA	NA	1
C155	4	1785104	8064	E17.5	C155	0.0306145	-139.796	-36.0435	G1	Seuratcds	1204563	8046	4	3	4_1	C1_4_1	Fluidigm	4_1	NA	NA	NA	NA	NA	NA	NA	NA	NA	NA	NA	NA	NA	NA	NA	NA	3
C156	2	1699801	7732	E17.5	C156	0.0251759	-94.3699	-201.625	G1	Seuratcds	1207051	7719	2	4	2_0	C1_2_0	Fluidigm	2_0	NA	NA	NA	NA	NA	NA	NA	NA	NA	NA	NA	NA	NA	NA	NA	NA	4
C157	4	1444664	7392	E17.5	C157	0.0343028	-90.586	-167.346	G1	Seuratcds	1205533	7380	4	1	4_0	C1_4_0	Fluidigm	4_0	NA	NA	NA	NA	NA	NA	NA	NA	NA	NA	NA	NA	NA	NA	NA	NA	1
C158	4	1855782	7498	E17.5	C158	0.026619	-116.499	476.742	G2M	Seuratcds	1206555	7490	4	3	4_1	C1_4_1	Fluidigm	4_1	NA	NA	NA	NA	NA	NA	NA	NA	NA	NA	NA	NA	NA	NA	NA	NA	3
C161	4	1274391	7261	E17.5	C161	0.0262957	-81.2075	-163.055	G1	Seuratcds	1204696	7246	4	4	4_1	C1_4_1	Fluidigm	4_1	NA	NA	NA	NA	NA	NA	NA	NA	NA	NA	NA	NA	NA	NA	NA	NA	4
C163	7	1724985	7333	E17.5	C163	0.0312669	-20.7289	-174.095	G1	Seuratcds	1205900	7327	7	4	7	C1_7	Fluidigm	7	NA	NA	NA	NA	NA	NA	NA	NA	NA	NA	NA	NA	NA	NA	NA	NA	4
C164	2	2066311	7493	E17.5	C164	0.0284367	421.981	11.8478	S	Seuratcds	1207495	7479	2	4	2_0	C1_2_0	Fluidigm	2_0	NA	NA	NA	NA	NA	NA	NA	NA	NA	NA	NA	NA	NA	NA	NA	NA	4
C165	4	1593926	8254	E17.5	C165	0.03409	-113.314	-176.424	G1	Seuratcds	1206135	8243	4	3	4_1	C1_4_1	Fluidigm	4_1	NA	NA	NA	NA	NA	NA	NA	NA	NA	NA	NA	NA	NA	NA	NA	NA	3
C166	7	1823957	7258	E17.5	C166	0.0251256	116.452	-157.336	S	Seuratcds	1206754	7245	7	3	7	C1_7	Fluidigm	7	NA	NA	NA	NA	NA	NA	NA	NA	NA	NA	NA	NA	NA	NA	NA	NA	3
C167	4	1328868	7529	E17.5	C167	0.0279494	-101.959	-182.201	G1	Seuratcds	1205220	7522	4	3	4_1	C1_4_1	Fluidigm	4_1	NA	NA	NA	NA	NA	NA	NA	NA	NA	NA	NA	NA	NA	NA	NA	NA	3
C168	4	71923	6503	E17.5	C168	0.0326599	7.32164	-0.0537159	S	Seuratcds	1171759	10146	4	5	4_0	C1_4_0	Fluidigm	4_0	NA	NA	NA	NA	NA	NA	NA	NA	NA	NA	NA	NA	NA	NA	NA	NA	5
C170	4	1764445	8394	E17.5	C170	0.0232396	-98.6526	492.073	G2M	Seuratcds	1206931	8362	4	1	4_0	C1_4_0	Fluidigm	4_0	NA	NA	NA	NA	NA	NA	NA	NA	NA	NA	NA	NA	NA	NA	NA	NA	1
C172	4	1496313	7623	E17.5	C172	0.0411251	40.5151	-142.358	S	Seuratcds	1207323	7615	4	1	4_0	C1_4_0	Fluidigm	4_0	NA	NA	NA	NA	NA	NA	NA	NA	NA	NA	NA	NA	NA	NA	NA	NA	1
C174	4	1911804	8237	E17.5	C174	0.0204477	64.904	638.678	G2M	Seuratcds	1208658	8222	4	3	4_0	C1_4_0	Fluidigm	4_0	NA	NA	NA	NA	NA	NA	NA	NA	NA	NA	NA	NA	NA	NA	NA	NA	3
C177	2	890420	7786	E17.5	C177	0.0292143	47.7439	-53.844	S	Seuratcds	1196594	7771	2	6	2_0	C1_2_0	Fluidigm	2_0	NA	NA	NA	NA	NA	NA	NA	NA	NA	NA	NA	NA	NA	NA	NA	NA	6
C184	7	2130053	7652	E17.5	C184	0.029726	-129.853	-240.437	G1	Seuratcds	1208493	7624	7	3	7	C1_7	Fluidigm	7	NA	NA	NA	NA	NA	NA	NA	NA	NA	NA	NA	NA	NA	NA	NA	NA	3
C185	7	1852662	7119	E17.5	C185	0.0283214	-74.5953	-180.365	G1	Seuratcds	1206592	7114	7	3	7	C1_7	Fluidigm	7	NA	NA	NA	NA	NA	NA	NA	NA	NA	NA	NA	NA	NA	NA	NA	NA	3
C186	4	1346042	7718	E17.5	C186	0.0310183	-92.356	-100.627	G1	Seuratcds	1204849	7708	4	3	4_0	C1_4_0	Fluidigm	4_0	NA	NA	NA	NA	NA	NA	NA	NA	NA	NA	NA	NA	NA	NA	NA	NA	3
C187	10	402084	7110	E17.5	C187	0.0378876	25.1504	5.56478	S	Seuratcds	1192172	7081	10	1	10	C1_10	Fluidigm	10	NA	NA	NA	NA	NA	NA	NA	NA	NA	NA	NA	NA	NA	NA	NA	NA	1
C189	4	289487	7229	E17.5	C189	0.0433422	-15.1275	-31.4956	G1	Seuratcds	1192282	7224	4	1	4_0	C1_4_0	Fluidigm	4_0	NA	NA	NA	NA	NA	NA	NA	NA	NA	NA	NA	NA	NA	NA	NA	NA	1
C190	11	1682907	7724	E17.5	C190	0.0254892	-45.1683	-150.795	G1	Seuratcds	1206003	7711	11	7	11	C1_11	Fluidigm	11	NA	NA	NA	NA	NA	NA	NA	NA	NA	NA	NA	NA	NA	NA	NA	NA	7
C193	2	2025955	7513	E17.5	C193	0.0307514	-108.818	-229.337	G1	Seuratcds	1207570	7507	2	4	2_0	C1_2_0	Fluidigm	2_0	NA	NA	NA	NA	NA	NA	NA	NA	NA	NA	NA	NA	NA	NA	NA	NA	4
C194	4	1343097	6674	E17.5	C194	0.0237377	-74.4045	-167.752	G1	Seuratcds	1205420	6665	4	3	4_0	C1_4_0	Fluidigm	4_0	NA	NA	NA	NA	NA	NA	NA	NA	NA	NA	NA	NA	NA	NA	NA	NA	3
C195	7	814559	5962	E17.5	C195	0.0273915	-43.3341	-98.7461	G1	Seuratcds	1200832	5955	7	3	7	C1_7	Fluidigm	7	NA	NA	NA	NA	NA	NA	NA	NA	NA	NA	NA	NA	NA	NA	NA	NA	3
C196	4	232177	8011	E17.5	C196	0.037859	-9.75439	-18.5238	G1	Seuratcds	1187040	8010	4	3	4_1	C1_4_1	Fluidigm	4_1	NA	NA	NA	NA	NA	NA	NA	NA	NA	NA	NA	NA	NA	NA	NA	NA	3
C201	10	1717288	5128	E17.5	C201	0.0261977	-108.02	-196.018	G1	Seuratcds	1207568	5107	10	1	10	C1_10	Fluidigm	10	NA	NA	NA	NA	NA	NA	NA	NA	NA	NA	NA	NA	NA	NA	NA	NA	1
C204	7	1832462	4576	E17.5	C204	0.0327838	-63.3156	-205.633	G1	Seuratcds	1206096	4567	7	3	7	C1_7	Fluidigm	7	NA	NA	NA	NA	NA	NA	NA	NA	NA	NA	NA	NA	NA	NA	NA	NA	3
C205	7	1352700	5977	E17.5	C205	0.0353781	-74.587	-108.903	G1	Seuratcds	1204694	5954	7	3	7	C1_7	Fluidigm	7	NA	NA	NA	NA	NA	NA	NA	NA	NA	NA	NA	NA	NA	NA	NA	NA	3
C206	11	3033857	5705	E17.5	C206	0.034438	424.65	844.893	G2M	Seuratcds	1210269	5286	11	7	11	C1_11	Fluidigm	11	NA	NA	NA	NA	NA	NA	NA	NA	NA	NA	NA	NA	NA	NA	NA	NA	7
C208	2	208832	3188	E17.5	C208	0.0327823	-20.482	-20.2363	G1	Seuratcds	1166526	3815	2	1	2_1	C1_2_1	Fluidigm	2_1	NA	NA	NA	NA	NA	NA	NA	NA	NA	NA	NA	NA	NA	NA	NA	NA	1
C210	2	177023	3311	E17.5	C210	0.0572468	-17.6711	-25.612	G1	Seuratcds	1151905	4106	2	4	2_0	C1_2_0	Fluidigm	2_0	NA	NA	NA	NA	NA	NA	NA	NA	NA	NA	NA	NA	NA	NA	NA	NA	4
C211	9	1886440	3816	E17.5	C211	0.0363134	-149.77	-170.026	G1	Seuratcds	1206489	3803	9	2	9	C1_9	Fluidigm	9	NA	NA	NA	NA	NA	NA	NA	NA	NA	NA	NA	NA	NA	NA	NA	NA	2
C212	10	2831742	4357	E17.5	C212	0.0334755	-214.842	-309.807	G1	Seuratcds	1209511	3913	10	1	10	C1_10	Fluidigm	10	NA	NA	NA	NA	NA	NA	NA	NA	NA	NA	NA	NA	NA	NA	NA	NA	1
C213	2	1990245	5036	E17.5	C213	0.0235046	-147.594	-175.499	G1	Seuratcds	1208477	5018	2	6	2_1	C1_2_1	Fluidigm	2_1	NA	NA	NA	NA	NA	NA	NA	NA	NA	NA	NA	NA	NA	NA	NA	NA	6
C215	11	1921304	5883	E17.5	C215	0.0324769	383.116	-90.2435	S	Seuratcds	1206917	5862	11	7	11	C1_11	Fluidigm	11	NA	NA	NA	NA	NA	NA	NA	NA	NA	NA	NA	NA	NA	NA	NA	NA	7
C217	4	1671962	5707	E17.5	C217	0.0259037	-65.1692	-175.045	G1	Seuratcds	1206924	5687	4	2	4_1	C1_4_1	Fluidigm	4_1	NA	NA	NA	NA	NA	NA	NA	NA	NA	NA	NA	NA	NA	NA	NA	NA	2
C218	11	339183	4165	E17.5	C218	0.0300487	-22.7465	-33.1	G1	Seuratcds	1173436	4210	11	7	11	C1_11	Fluidigm	11	NA	NA	NA	NA	NA	NA	NA	NA	NA	NA	NA	NA	NA	NA	NA	NA	7
C220	10	1994103	3999	E17.5	C220	0.0312837	-128.495	-219.821	G1	Seuratcds	1205943	3987	10	1	10	C1_10	Fluidigm	10	NA	NA	NA	NA	NA	NA	NA	NA	NA	NA	NA	NA	NA	NA	NA	NA	1
C221	4	1589703	4674	E17.5	C221	0.0292344	-104.07	-183.004	G1	Seuratcds	1207302	4667	4	3	4_1	C1_4_1	Fluidigm	4_1	NA	NA	NA	NA	NA	NA	NA	NA	NA	NA	NA	NA	NA	NA	NA	NA	3
C224	10	2468640	4691	E17.5	C224	0.0311017	-165.869	-303.353	G1	Seuratcds	1209500	4148	10	1	10	C1_10	Fluidigm	10	NA	NA	NA	NA	NA	NA	NA	NA	NA	NA	NA	NA	NA	NA	NA	NA	1
C225	11	1794609	6674	E17.5	C225	0.0366464	-40.5689	366.878	G2M	Seuratcds	1206256	6648	11	7	11	C1_11	Fluidigm	11	NA	NA	NA	NA	NA	NA	NA	NA	NA	NA	NA	NA	NA	NA	NA	NA	7
C226	9	1930699	3875	E17.5	C226	0.0318216	-169.386	-193.847	G1	Seuratcds	1210960	3847	9	2	9	C1_9	Fluidigm	9	NA	NA	NA	NA	NA	NA	NA	NA	NA	NA	NA	NA	NA	NA	NA	NA	2
C227	2	270059	3261	E17.5	C227	0.0288641	-1.1653	-27.7405	G1	Seuratcds	1168314	3579	2	1	2_1	C1_2_1	Fluidigm	2_1	NA	NA	NA	NA	NA	NA	NA	NA	NA	NA	NA	NA	NA	NA	NA	NA	1
C231	4	377103	4832	E17.5	C231	0.0310154	32.7168	9.84741	S	Seuratcds	1190766	4847	4	3	4_1	C1_4_1	Fluidigm	4_1	NA	NA	NA	NA	NA	NA	NA	NA	NA	NA	NA	NA	NA	NA	NA	NA	3
C232	1	221030	3931	E17.5	C232	0.0415645	-10.7745	-24.2915	G1	Seuratcds	1163432	4302	1	3	1	C1_1	Fluidigm	1	NA	NA	NA	NA	NA	NA	NA	NA	NA	NA	NA	NA	NA	NA	NA	NA	3
C233	2	1551932	5956	E17.5	C233	0.0324763	-105.363	-178.4	G1	Seuratcds	1206039	5946	2	4	2_0	C1_2_0	Fluidigm	2_0	NA	NA	NA	NA	NA	NA	NA	NA	NA	NA	NA	NA	NA	NA	NA	NA	4
C234	11	602983	3842	E17.5	C234	0.036807	-46.7824	-55.8837	G1	Seuratcds	1193497	3832	11	7	11	C1_11	Fluidigm	11	NA	NA	NA	NA	NA	NA	NA	NA	NA	NA	NA	NA	NA	NA	NA	NA	7
C236	2	1696763	4605	E17.5	C236	0.0313786	63.8762	475.745	G2M	Seuratcds	1207229	4598	2	4	2_0	C1_2_0	Fluidigm	2_0	NA	NA	NA	NA	NA	NA	NA	NA	NA	NA	NA	NA	NA	NA	NA	NA	4
C237	10	1958227	5980	E17.5	C237	0.0288817	336.223	-98.9148	S	Seuratcds	1207598	5961	10	1	10	C1_10	Fluidigm	10	NA	NA	NA	NA	NA	NA	NA	NA	NA	NA	NA	NA	NA	NA	NA	NA	1
C238	2	227611	4527	E17.5	C238	0.0312507	-5.5716	-7.53373	G1	Seuratcds	1163765	4779	2	4	2_1	C1_2_1	Fluidigm	2_1	NA	NA	NA	NA	NA	NA	NA	NA	NA	NA	NA	NA	NA	NA	NA	NA	4
C239	2	817933	4726	E17.5	C239	0.0315295	-92.4	-55.8375	G1	Seuratcds	1187030	4712	2	6	2_1	C1_2_1	Fluidigm	2_1	NA	NA	NA	NA	NA	NA	NA	NA	NA	NA	NA	NA	NA	NA	NA	NA	6
C240	10	2013088	4658	E17.5	C240	0.0311208	-114.43	-202.512	G1	Seuratcds	1208569	4646	10	1	10	C1_10	Fluidigm	10	NA	NA	NA	NA	NA	NA	NA	NA	NA	NA	NA	NA	NA	NA	NA	NA	1
C241	2	1579552	4504	E17.5	C241	0.0307802	-68.1036	-146.759	G1	Seuratcds	1205564	4500	2	4	2_0	C1_2_0	Fluidigm	2_0	NA	NA	NA	NA	NA	NA	NA	NA	NA	NA	NA	NA	NA	NA	NA	NA	4
C243	2	1480016	6441	E17.5	C243	0.0266477	-18.1198	-158.216	G1	Seuratcds	1204934	6424	2	6	2_1	C1_2_1	Fluidigm	2_1	NA	NA	NA	NA	NA	NA	NA	NA	NA	NA	NA	NA	NA	NA	NA	NA	6
C244	2	1249964	6783	E17.5	C244	0.0264392	130.448	112.932	S	Seuratcds	1203801	6762	2	6	2_1	C1_2_1	Fluidigm	2_1	NA	NA	NA	NA	NA	NA	NA	NA	NA	NA	NA	NA	NA	NA	NA	NA	6
C245	2	1162986	5064	E17.5	C245	0.0233864	-95.2244	-111.416	G1	Seuratcds	1202859	5049	2	6	2_1	C1_2_1	Fluidigm	2_1	NA	NA	NA	NA	NA	NA	NA	NA	NA	NA	NA	NA	NA	NA	NA	NA	6
C249	2	232223	3388	E17.5	C249	0.0361291	-19.3203	-22.0579	G1	Seuratcds	1181635	3806	2	1	2_1	C1_2_1	Fluidigm	2_1	NA	NA	NA	NA	NA	NA	NA	NA	NA	NA	NA	NA	NA	NA	NA	NA	1
C250	9	2302355	4224	E17.5	C250	0.0268955	-131.431	-281.599	G1	Seuratcds	1211079	4040	9	2	9	C1_9	Fluidigm	9	NA	NA	NA	NA	NA	NA	NA	NA	NA	NA	NA	NA	NA	NA	NA	NA	2
C251	2	189763	4399	E17.5	C251	0.0464263	5.47218	60.6261	G2M	Seuratcds	1177414	4809	2	4	2_0	C1_2_0	Fluidigm	2_0	NA	NA	NA	NA	NA	NA	NA	NA	NA	NA	NA	NA	NA	NA	NA	NA	4
C252	2	2946311	4751	E17.5	C252	0.0301764	-144.963	-350.97	G1	Seuratcds	1208768	4386	2	6	2_1	C1_2_1	Fluidigm	2_1	NA	NA	NA	NA	NA	NA	NA	NA	NA	NA	NA	NA	NA	NA	NA	NA	6
C253	2	1778832	3441	E17.5	C253	0.020487	-167.846	-221.839	G1	Seuratcds	1208562	3433	2	6	2_1	C1_2_1	Fluidigm	2_1	NA	NA	NA	NA	NA	NA	NA	NA	NA	NA	NA	NA	NA	NA	NA	NA	6
C254	11	364267	3991	E17.5	C254	0.0280893	28.906	-28.6764	S	Seuratcds	1181671	4035	11	7	11	C1_11	Fluidigm	11	NA	NA	NA	NA	NA	NA	NA	NA	NA	NA	NA	NA	NA	NA	NA	NA	7
C255	9	2217698	3725	E17.5	C255	0.0271958	-103.165	-205.404	G1	Seuratcds	1211835	3583	9	2	9	C1_9	Fluidigm	9	NA	NA	NA	NA	NA	NA	NA	NA	NA	NA	NA	NA	NA	NA	NA	NA	2
C256	2	65944	3607	E17.5	C256	0.0913351	-7.79945	-10.0128	G1	Seuratcds	1110845	10236	2	0	2_0	C1_2_0	Fluidigm	2_0	NA	NA	NA	NA	NA	NA	NA	NA	NA	NA	NA	NA	NA	NA	NA	NA	0
C260	2	331945	4343	E17.5	C260	0.0257964	18.997	54.5928	G2M	Seuratcds	1186775	4390	2	4	2_0	C1_2_0	Fluidigm	2_0	NA	NA	NA	NA	NA	NA	NA	NA	NA	NA	NA	NA	NA	NA	NA	NA	4
C262	2	133793	2862	E17.5	C262	0.0329614	7.17358	-1.35271	S	Seuratcds	1163305	5145	2	1	2_1	C1_2_1	Fluidigm	2_1	NA	NA	NA	NA	NA	NA	NA	NA	NA	NA	NA	NA	NA	NA	NA	NA	1
C265	2	2100028	4192	E17.5	C265	0.0304101	-124.187	-206.189	G1	Seuratcds	1208135	4166	2	4	2_0	C1_2_0	Fluidigm	2_0	NA	NA	NA	NA	NA	NA	NA	NA	NA	NA	NA	NA	NA	NA	NA	NA	4
C270	2	2029856	4864	E17.5	C270	0.0322437	-147.834	-239.798	G1	Seuratcds	1208558	4849	2	3	2_0	C1_2_0	Fluidigm	2_0	NA	NA	NA	NA	NA	NA	NA	NA	NA	NA	NA	NA	NA	NA	NA	NA	3
C271	11	1704333	5804	E17.5	C271	0.0302693	462.342	164.747	S	Seuratcds	1205763	5781	11	7	11	C1_11	Fluidigm	11	NA	NA	NA	NA	NA	NA	NA	NA	NA	NA	NA	NA	NA	NA	NA	NA	7
C276	7	2344464	3055	E17.5	C276	0.0232104	-208.95	-201.508	G1	Seuratcds	1208258	2801	7	4	7	C1_7	Fluidigm	7	NA	NA	NA	NA	NA	NA	NA	NA	NA	NA	NA	NA	NA	NA	NA	NA	4
C278	2	34046	3085	E17.5	C278	0.0752805	-1.10258	-0.972978	G1	Seuratcds	1186666	12964	2	5	2_0	C1_2_0	Fluidigm	2_0	NA	NA	NA	NA	NA	NA	NA	NA	NA	NA	NA	NA	NA	NA	NA	NA	5
C281	2	1560028	3472	E17.5	C281	0.0207067	-144.209	-138.692	G1	Seuratcds	1209803	3461	2	6	2_1	C1_2_1	Fluidigm	2_1	NA	NA	NA	NA	NA	NA	NA	NA	NA	NA	NA	NA	NA	NA	NA	NA	6
C293	2	1870188	3480	E17.5	C293	0.0251969	-54.9071	453.938	G2M	Seuratcds	1207001	3468	2	4	2_0	C1_2_0	Fluidigm	2_0	NA	NA	NA	NA	NA	NA	NA	NA	NA	NA	NA	NA	NA	NA	NA	NA	4
C305	1	293856	2217	E14.5	C305	0.029477	0.155146	-31.8242	S	Seuratcds	1192512	2559	1	2	1	C1_1	Fluidigm	1	NA	NA	NA	NA	NA	NA	NA	NA	NA	NA	NA	NA	NA	NA	NA	NA	2
C309	9	1395125	6476	E14.5	C309	0.0190771	265.845	-34.4712	S	Seuratcds	1205732	6456	9	0	9	C1_9	Fluidigm	9	NA	NA	NA	NA	NA	NA	NA	NA	NA	NA	NA	NA	NA	NA	NA	NA	0
C310	3	752766	2986	E14.5	C310	0.0349192	-1.11802	56.7693	G2M	Seuratcds	1199848	2983	3	0	3	C1_3	Fluidigm	3	NA	NA	NA	NA	NA	NA	NA	NA	NA	NA	NA	NA	NA	NA	NA	NA	0
C311	1	764997	4660	E14.5	C311	0.0272236	-73.2367	-76.0314	G1	Seuratcds	1194881	4624	1	2	1	C1_1	Fluidigm	1	NA	NA	NA	NA	NA	NA	NA	NA	NA	NA	NA	NA	NA	NA	NA	NA	2
C316	6	829621	4979	E14.5	C316	0.0242882	100.538	138.312	G2M	Seuratcds	1198641	4971	6	0	6	C1_6	Fluidigm	6	NA	NA	NA	NA	NA	NA	NA	NA	NA	NA	NA	NA	NA	NA	NA	NA	0
C317	1	582514	4179	E14.5	C317	0.0192802	-28.1648	-51.5227	G1	Seuratcds	1186339	4169	1	2	1	C1_1	Fluidigm	1	NA	NA	NA	NA	NA	NA	NA	NA	NA	NA	NA	NA	NA	NA	NA	NA	2
C321	9	1333395	4496	E14.5	C321	0.0223355	50.0014	307.11	G2M	Seuratcds	1205402	4488	9	0	9	C1_9	Fluidigm	9	NA	NA	NA	NA	NA	NA	NA	NA	NA	NA	NA	NA	NA	NA	NA	NA	0
C326	1	648828	3353	E14.5	C326	0.0320979	-46.5946	-78.5696	G1	Seuratcds	1191069	3344	1	2	1	C1_1	Fluidigm	1	NA	NA	NA	NA	NA	NA	NA	NA	NA	NA	NA	NA	NA	NA	NA	NA	2
C327	1	555889	2835	E14.5	C327	0.0245391	-57.526	-50.1576	G1	Seuratcds	1190714	2838	1	2	1	C1_1	Fluidigm	1	NA	NA	NA	NA	NA	NA	NA	NA	NA	NA	NA	NA	NA	NA	NA	NA	2
C333	1	677980	4194	E14.5	C333	0.0216496	-34.9259	-52.2463	G1	Seuratcds	1191721	4175	1	5	1	C1_1	Fluidigm	1	NA	NA	NA	NA	NA	NA	NA	NA	NA	NA	NA	NA	NA	NA	NA	NA	5
C335	1	166187	2442	E14.5	C335	0.0357188	-15.0952	-17.5916	G1	Seuratcds	1183125	3624	1	5	1	C1_1	Fluidigm	1	NA	NA	NA	NA	NA	NA	NA	NA	NA	NA	NA	NA	NA	NA	NA	NA	5
C339	0	1039833	5118	E14.5	C339	0.0230172	138.081	87.0772	S	Seuratcds	1201851	5103	0	3	0	C1_0	Fluidigm	0	NA	NA	NA	NA	NA	NA	NA	NA	NA	NA	NA	NA	NA	NA	NA	NA	3
C344	1	676628	4787	E14.5	C344	0.0228072	-34.8594	-60.1941	G1	Seuratcds	1197786	4776	1	0	1	C1_1	Fluidigm	1	NA	NA	NA	NA	NA	NA	NA	NA	NA	NA	NA	NA	NA	NA	NA	NA	0
C346	7	854153	2881	E14.5	C346	0.0284282	-69.0887	-106.894	G1	Seuratcds	1202081	2878	7	0	7	C1_7	Fluidigm	7	NA	NA	NA	NA	NA	NA	NA	NA	NA	NA	NA	NA	NA	NA	NA	NA	0
C350	9	893297	4699	E14.5	C350	0.0273257	-30.5073	430.783	G2M	Seuratcds	1200100	4684	9	0	9	C1_9	Fluidigm	9	NA	NA	NA	NA	NA	NA	NA	NA	NA	NA	NA	NA	NA	NA	NA	NA	0
C351	1	622930	3338	E14.5	C351	0.0229448	-24.8029	-64.8775	G1	Seuratcds	1194008	3330	1	0	1	C1_1	Fluidigm	1	NA	NA	NA	NA	NA	NA	NA	NA	NA	NA	NA	NA	NA	NA	NA	NA	0
C353	1	427509	3219	E14.5	C353	0.0251012	-29.0707	-40.97	G1	Seuratcds	1188934	3266	1	2	1	C1_1	Fluidigm	1	NA	NA	NA	NA	NA	NA	NA	NA	NA	NA	NA	NA	NA	NA	NA	NA	2
C354	9	667224	3525	E14.5	C354	0.0204504	-38.6358	-69.5466	G1	Seuratcds	1198518	3513	9	0	9	C1_9	Fluidigm	9	NA	NA	NA	NA	NA	NA	NA	NA	NA	NA	NA	NA	NA	NA	NA	NA	0
C355	1	555423	2869	E14.5	C355	0.0315867	-48.5608	-57.7011	G1	Seuratcds	1196611	2880	1	0	1	C1_1	Fluidigm	1	NA	NA	NA	NA	NA	NA	NA	NA	NA	NA	NA	NA	NA	NA	NA	NA	0
C356	1	557708	2730	E14.5	C356	0.025759	-31.0291	-57.3943	G1	Seuratcds	1194463	2731	1	2	1	C1_1	Fluidigm	1	NA	NA	NA	NA	NA	NA	NA	NA	NA	NA	NA	NA	NA	NA	NA	NA	2
C358	1	237660	2570	E14.5	C358	0.0282715	-6.40416	-18.084	G1	Seuratcds	1186688	3084	1	0	1	C1_1	Fluidigm	1	NA	NA	NA	NA	NA	NA	NA	NA	NA	NA	NA	NA	NA	NA	NA	NA	0
C360	1	911138	3799	E14.5	C360	0.0221361	-57.5882	-91.5003	G1	Seuratcds	1200215	3786	1	2	1	C1_1	Fluidigm	1	NA	NA	NA	NA	NA	NA	NA	NA	NA	NA	NA	NA	NA	NA	NA	NA	2
C361	1	474712	2908	E14.5	C361	0.0478543	-22.617	-54.4835	G1	Seuratcds	1194061	2927	1	0	1	C1_1	Fluidigm	1	NA	NA	NA	NA	NA	NA	NA	NA	NA	NA	NA	NA	NA	NA	NA	NA	0
C364	9	406106	5573	E14.5	C364	0.0194358	-32.4699	-37.5562	G1	Seuratcds	1179662	5557	9	5	9	C1_9	Fluidigm	9	NA	NA	NA	NA	NA	NA	NA	NA	NA	NA	NA	NA	NA	NA	NA	NA	5
C365	1	551252	2808	E14.5	C365	0.0287836	-12.8987	-64.6049	G1	Seuratcds	1194497	2818	1	0	1	C1_1	Fluidigm	1	NA	NA	NA	NA	NA	NA	NA	NA	NA	NA	NA	NA	NA	NA	NA	NA	0
C366	9	198084	2735	E14.5	C366	0.0238586	-12.2878	86.195	G2M	Seuratcds	1187628	3469	9	5	9	C1_9	Fluidigm	9	NA	NA	NA	NA	NA	NA	NA	NA	NA	NA	NA	NA	NA	NA	NA	NA	5
C368	1	539584	2495	E14.5	C368	0.0287184	-34.2944	-65.2946	G1	Seuratcds	1191567	2512	1	0	1	C1_1	Fluidigm	1	NA	NA	NA	NA	NA	NA	NA	NA	NA	NA	NA	NA	NA	NA	NA	NA	0
C369	1	79133	2456	E14.5	C369	0.0248948	-4.80739	-10.0058	G1	Seuratcds	1191715	8367	1	0	1	C1_1	Fluidigm	1	NA	NA	NA	NA	NA	NA	NA	NA	NA	NA	NA	NA	NA	NA	NA	NA	0
C370	9	700654	5156	E14.5	C370	0.0226817	-25.8059	-78.4972	G1	Seuratcds	1198068	5142	9	1	9	C1_9	Fluidigm	9	NA	NA	NA	NA	NA	NA	NA	NA	NA	NA	NA	NA	NA	NA	NA	NA	1
C371	1	599445	2793	E14.5	C371	0.0253151	-35.3724	-65.0511	G1	Seuratcds	1195516	2795	1	2	1	C1_1	Fluidigm	1	NA	NA	NA	NA	NA	NA	NA	NA	NA	NA	NA	NA	NA	NA	NA	NA	2
C372	9	840703	3628	E14.5	C372	0.0182621	-54.0543	-60.0674	G1	Seuratcds	1198587	3623	9	0	9	C1_9	Fluidigm	9	NA	NA	NA	NA	NA	NA	NA	NA	NA	NA	NA	NA	NA	NA	NA	NA	0
C374	1	824542	3252	E14.5	C374	0.0200887	-69.6499	-84.0927	G1	Seuratcds	1197721	3246	1	2	1	C1_1	Fluidigm	1	NA	NA	NA	NA	NA	NA	NA	NA	NA	NA	NA	NA	NA	NA	NA	NA	2
C375	3	596841	3263	E14.5	C375	0.0364955	-31.0765	-55.9934	G1	Seuratcds	1196426	3262	3	0	3	C1_3	Fluidigm	3	NA	NA	NA	NA	NA	NA	NA	NA	NA	NA	NA	NA	NA	NA	NA	NA	0
C376	1	400573	2259	E14.5	C376	0.0211297	-24.4031	-26.3526	G1	Seuratcds	1186374	2373	1	2	1	C1_1	Fluidigm	1	NA	NA	NA	NA	NA	NA	NA	NA	NA	NA	NA	NA	NA	NA	NA	NA	2
C377	1	436900	3511	E14.5	C377	0.031149	72.7881	-3.43153	S	Seuratcds	1193865	3542	1	0	1	C1_1	Fluidigm	1	NA	NA	NA	NA	NA	NA	NA	NA	NA	NA	NA	NA	NA	NA	NA	NA	0
C380	7	691806	4632	E14.5	C380	0.0276725	-9.92567	-77.6747	G1	Seuratcds	1201240	4612	7	3	7	C1_7	Fluidigm	7	NA	NA	NA	NA	NA	NA	NA	NA	NA	NA	NA	NA	NA	NA	NA	NA	3
C382	1	947427	2771	E14.5	C382	0.0143135	-103.799	-92.7328	G1	Seuratcds	1197982	2764	1	3	1	C1_1	Fluidigm	1	NA	NA	NA	NA	NA	NA	NA	NA	NA	NA	NA	NA	NA	NA	NA	NA	3
C386	9	768932	3686	E14.5	C386	0.0297074	43.8962	-88.1688	S	Seuratcds	1201061	3682	9	0	9	C1_9	Fluidigm	9	NA	NA	NA	NA	NA	NA	NA	NA	NA	NA	NA	NA	NA	NA	NA	NA	0
C403	3	124983	2041	E14.5	C403	0.0552155	-13.7468	1.85712	G2M	Seuratcds	1179374	5122	3	0	3	C1_3	Fluidigm	3	NA	NA	NA	NA	NA	NA	NA	NA	NA	NA	NA	NA	NA	NA	NA	NA	0
C405	0	1003888	5434	E14.5	C405	0.0246133	50.5855	122.114	G2M	Seuratcds	1202560	5425	0	0	0	C1_0	Fluidigm	0	NA	NA	NA	NA	NA	NA	NA	NA	NA	NA	NA	NA	NA	NA	NA	NA	0
C406	10	765765	4836	E14.5	C406	0.0429139	26.8813	-80.4144	S	Seuratcds	1201523	4819	10	1	10	C1_10	Fluidigm	10	NA	NA	NA	NA	NA	NA	NA	NA	NA	NA	NA	NA	NA	NA	NA	NA	1
C407	8	498029	3141	E14.5	C407	0.0353453	-36.5992	-32.5737	G1	Seuratcds	1194947	3148	8	5	8	C1_8	Fluidigm	8	NA	NA	NA	NA	NA	NA	NA	NA	NA	NA	NA	NA	NA	NA	NA	NA	5
C409	5	1291146	4555	E14.5	C409	0.0266538	-89.7598	-142.787	G1	Seuratcds	1203668	4539	5	5	5	C1_5	Fluidigm	5	NA	NA	NA	NA	NA	NA	NA	NA	NA	NA	NA	NA	NA	NA	NA	NA	5
C416	0	449988	4311	E14.5	C416	0.0298875	-42.1836	-54.6751	G1	Seuratcds	1189868	4312	0	0	0	C1_0	Fluidigm	0	NA	NA	NA	NA	NA	NA	NA	NA	NA	NA	NA	NA	NA	NA	NA	NA	0
C417	6	749068	5189	E14.5	C417	0.0294045	-37.749	-79.0999	G1	Seuratcds	1201036	5181	6	5	6	C1_6	Fluidigm	6	NA	NA	NA	NA	NA	NA	NA	NA	NA	NA	NA	NA	NA	NA	NA	NA	5
C419	0	1334673	5988	E14.5	C419	0.0272134	35.9653	507.06	G2M	Seuratcds	1204802	5977	0	0	0	C1_0	Fluidigm	0	NA	NA	NA	NA	NA	NA	NA	NA	NA	NA	NA	NA	NA	NA	NA	NA	0
C420	5	568749	4980	E14.5	C420	0.0353724	-27.1678	-31.8384	G1	Seuratcds	1198601	4971	5	5	5	C1_5	Fluidigm	5	NA	NA	NA	NA	NA	NA	NA	NA	NA	NA	NA	NA	NA	NA	NA	NA	5
C424	12	775494	4158	E14.5	C424	0.0330499	77.3059	51.167	S	Seuratcds	1201594	4150	12	0	12	C1_12	Fluidigm	12	NA	NA	NA	NA	NA	NA	NA	NA	NA	NA	NA	NA	NA	NA	NA	NA	0
C431	8	1387195	3764	E14.5	C431	0.0184639	-114.936	-145.85	G1	Seuratcds	1205474	3758	8	0	8	C1_8	Fluidigm	8	NA	NA	NA	NA	NA	NA	NA	NA	NA	NA	NA	NA	NA	NA	NA	NA	0
C436	8	357158	3173	E14.5	C436	0.033425	-13.9976	-35.5302	G1	Seuratcds	1191845	3251	8	5	8	C1_8	Fluidigm	8	NA	NA	NA	NA	NA	NA	NA	NA	NA	NA	NA	NA	NA	NA	NA	NA	5
C437	0	1199421	6011	E14.5	C437	0.0278193	185.466	37.8512	S	Seuratcds	1203656	5993	0	0	0	C1_0	Fluidigm	0	NA	NA	NA	NA	NA	NA	NA	NA	NA	NA	NA	NA	NA	NA	NA	NA	0
C440	12	1118060	3610	E14.5	C440	0.0273536	-54.7672	-95.5472	G1	Seuratcds	1203650	3604	12	0	12	C1_12	Fluidigm	12	NA	NA	NA	NA	NA	NA	NA	NA	NA	NA	NA	NA	NA	NA	NA	NA	0
C441	0	619223	4550	E14.5	C441	0.029172	142.251	33.6926	S	Seuratcds	1199374	4543	0	0	0	C1_0	Fluidigm	0	NA	NA	NA	NA	NA	NA	NA	NA	NA	NA	NA	NA	NA	NA	NA	NA	0
C442	0	1135674	4123	E14.5	C442	0.0224809	-70.5052	-125.634	G1	Seuratcds	1203671	4118	0	0	0	C1_0	Fluidigm	0	NA	NA	NA	NA	NA	NA	NA	NA	NA	NA	NA	NA	NA	NA	NA	NA	0
C444	5	1361302	5011	E14.5	C444	0.0306934	-68.5323	-150.661	G1	Seuratcds	1204277	4999	5	0	5	C1_5	Fluidigm	5	NA	NA	NA	NA	NA	NA	NA	NA	NA	NA	NA	NA	NA	NA	NA	NA	0
C446	0	1069292	2455	E14.5	C446	0.0216414	-33.6893	-62.2636	G1	Seuratcds	1203513	2447	0	0	0	C1_0	Fluidigm	0	NA	NA	NA	NA	NA	NA	NA	NA	NA	NA	NA	NA	NA	NA	NA	NA	0
C447	0	764679	6201	E14.5	C447	0.0276717	-7.59234	30.0341	G2M	Seuratcds	1200822	6188	0	0	0	C1_0	Fluidigm	0	NA	NA	NA	NA	NA	NA	NA	NA	NA	NA	NA	NA	NA	NA	NA	NA	0
C451	12	778300	3822	E14.5	C451	0.0384106	-26.3316	13.3098	G2M	Seuratcds	1201963	3812	12	0	12	C1_12	Fluidigm	12	NA	NA	NA	NA	NA	NA	NA	NA	NA	NA	NA	NA	NA	NA	NA	NA	0
C453	0	1293287	3777	E14.5	C453	0.0199855	-84.0885	-109.477	G1	Seuratcds	1204921	3769	0	0	0	C1_0	Fluidigm	0	NA	NA	NA	NA	NA	NA	NA	NA	NA	NA	NA	NA	NA	NA	NA	NA	0
C454	6	1205699	3810	E14.5	C454	0.024259	-73.5038	-106.827	G1	Seuratcds	1204658	3804	6	5	6	C1_6	Fluidigm	6	NA	NA	NA	NA	NA	NA	NA	NA	NA	NA	NA	NA	NA	NA	NA	NA	5
C455	5	850353	3207	E14.5	C455	0.0320196	-27.0467	-93.5283	G1	Seuratcds	1201996	3205	5	5	5	C1_5	Fluidigm	5	NA	NA	NA	NA	NA	NA	NA	NA	NA	NA	NA	NA	NA	NA	NA	NA	5
C456	0	645315	4742	E14.5	C456	0.0318046	0.192268	-59.363	S	Seuratcds	1199987	4730	0	0	0	C1_0	Fluidigm	0	NA	NA	NA	NA	NA	NA	NA	NA	NA	NA	NA	NA	NA	NA	NA	NA	0
C457	5	473471	4239	E14.5	C457	0.0421779	10.5008	-49.654	S	Seuratcds	1193031	4231	5	5	5	C1_5	Fluidigm	5	NA	NA	NA	NA	NA	NA	NA	NA	NA	NA	NA	NA	NA	NA	NA	NA	5
C458	0	982296	4116	E14.5	C458	0.0304827	-21.2469	-71.704	G1	Seuratcds	1200851	4102	0	0	0	C1_0	Fluidigm	0	NA	NA	NA	NA	NA	NA	NA	NA	NA	NA	NA	NA	NA	NA	NA	NA	0
C459	8	245215	3214	E14.5	C459	0.0358583	-7.17964	-25.14	G1	Seuratcds	1191056	3547	8	0	8	C1_8	Fluidigm	8	NA	NA	NA	NA	NA	NA	NA	NA	NA	NA	NA	NA	NA	NA	NA	NA	0
C461	5	249901	3127	E14.5	C461	0.0368026	-15.3854	-25.254	G1	Seuratcds	1191955	3437	5	5	5	C1_5	Fluidigm	5	NA	NA	NA	NA	NA	NA	NA	NA	NA	NA	NA	NA	NA	NA	NA	NA	5
C464	0	1237964	4857	E14.5	C464	0.0267827	-17.1959	325.582	G2M	Seuratcds	1203915	4850	0	3	0	C1_0	Fluidigm	0	NA	NA	NA	NA	NA	NA	NA	NA	NA	NA	NA	NA	NA	NA	NA	NA	3
C465	0	672239	4409	E14.5	C465	0.0400081	38.8169	117.543	G2M	Seuratcds	1200729	4400	0	0	0	C1_0	Fluidigm	0	NA	NA	NA	NA	NA	NA	NA	NA	NA	NA	NA	NA	NA	NA	NA	NA	0
C466	0	1881731	4790	E14.5	C466	0.0241846	-112.021	-190.403	G1	Seuratcds	1206049	4778	0	0	0	C1_0	Fluidigm	0	NA	NA	NA	NA	NA	NA	NA	NA	NA	NA	NA	NA	NA	NA	NA	NA	0
C468	0	1203387	5224	E14.5	C468	0.0309427	-51.1614	291.391	G2M	Seuratcds	1203301	5211	0	0	0	C1_0	Fluidigm	0	NA	NA	NA	NA	NA	NA	NA	NA	NA	NA	NA	NA	NA	NA	NA	NA	0
C477	6	883510	5352	E14.5	C477	0.0255843	169.066	78.206	S	Seuratcds	1201119	5338	6	5	6	C1_6	Fluidigm	6	NA	NA	NA	NA	NA	NA	NA	NA	NA	NA	NA	NA	NA	NA	NA	NA	5
C485	1	732395	3313	E14.5	C485	0.0318025	-46.7574	-71.457	G1	Seuratcds	1198077	3306	1	5	1	C1_1	Fluidigm	1	NA	NA	NA	NA	NA	NA	NA	NA	NA	NA	NA	NA	NA	NA	NA	NA	5
C486	5	1357367	4183	E14.5	C486	0.0256298	-73.741	-136.261	G1	Seuratcds	1204000	4174	5	0	5	C1_5	Fluidigm	5	NA	NA	NA	NA	NA	NA	NA	NA	NA	NA	NA	NA	NA	NA	NA	NA	0
C489	3	746265	3277	E14.5	C489	0.0367497	-52.6226	-81.4509	G1	Seuratcds	1200908	3275	3	0	3	C1_3	Fluidigm	3	NA	NA	NA	NA	NA	NA	NA	NA	NA	NA	NA	NA	NA	NA	NA	NA	0
C492	6	1168441	4625	E14.5	C492	0.0235331	227.269	256.461	G2M	Seuratcds	1203238	4616	6	5	6	C1_6	Fluidigm	6	NA	NA	NA	NA	NA	NA	NA	NA	NA	NA	NA	NA	NA	NA	NA	NA	5
C496	0	1306722	3645	E14.5	C496	0.0272552	-50.9154	38.5317	G2M	Seuratcds	1203010	3640	0	0	0	C1_0	Fluidigm	0	NA	NA	NA	NA	NA	NA	NA	NA	NA	NA	NA	NA	NA	NA	NA	NA	0
C503	8	448907	2971	E11.5	C503	0.042472	-21.5625	-60.2785	G1	Seuratcds	1192766	3010	8	0	8	C1_8	Fluidigm	8	NA	NA	NA	NA	NA	NA	NA	NA	NA	NA	NA	NA	NA	NA	NA	NA	0
C507	5	2339948	4428	E11.5	C507	0.0307725	-201.965	-51.7202	G1	Seuratcds	1207955	4245	5	0	5	C1_5	Fluidigm	5	NA	NA	NA	NA	NA	NA	NA	NA	NA	NA	NA	NA	NA	NA	NA	NA	0
C510	3	539391	3176	E11.5	C510	0.0382227	-5.47585	-64.8935	G1	Seuratcds	1195550	3179	3	0	3	C1_3	Fluidigm	3	NA	NA	NA	NA	NA	NA	NA	NA	NA	NA	NA	NA	NA	NA	NA	NA	0
C511	3	936363	3386	E11.5	C511	0.0343691	-58.7129	-45.1045	G1	Seuratcds	1202515	3381	3	0	3	C1_3	Fluidigm	3	NA	NA	NA	NA	NA	NA	NA	NA	NA	NA	NA	NA	NA	NA	NA	NA	0
C512	8	1139137	3753	E11.5	C512	0.036417	78.9258	-94.6751	S	Seuratcds	1203311	3745	8	0	8	C1_8	Fluidigm	8	NA	NA	NA	NA	NA	NA	NA	NA	NA	NA	NA	NA	NA	NA	NA	NA	0
C513	3	321428	3711	E11.5	C513	0.0943602	-5.99855	8.08461	G2M	Seuratcds	1182814	3777	3	0	3	C1_3	Fluidigm	3	NA	NA	NA	NA	NA	NA	NA	NA	NA	NA	NA	NA	NA	NA	NA	NA	0
C515	1	1935488	4642	E11.5	C515	0.0311193	-93.3842	861.501	G2M	Seuratcds	1208247	4630	1	0	1	C1_1	Fluidigm	1	NA	NA	NA	NA	NA	NA	NA	NA	NA	NA	NA	NA	NA	NA	NA	NA	0
C516	3	249814	4565	E11.5	C516	0.0888541	-10.5758	-28.9828	G1	Seuratcds	1181998	4694	3	0	3	C1_3	Fluidigm	3	NA	NA	NA	NA	NA	NA	NA	NA	NA	NA	NA	NA	NA	NA	NA	NA	0
C519	1	2175144	5576	E11.5	C519	0.0316696	-17.4307	1157.01	G2M	Seuratcds	1209912	5536	1	0	1	C1_1	Fluidigm	1	NA	NA	NA	NA	NA	NA	NA	NA	NA	NA	NA	NA	NA	NA	NA	NA	0
C524	3	1108452	3978	E11.5	C524	0.055979	-80.283	-77.6857	G1	Seuratcds	1203330	3970	3	0	3	C1_3	Fluidigm	3	NA	NA	NA	NA	NA	NA	NA	NA	NA	NA	NA	NA	NA	NA	NA	NA	0
C525	3	693708	3539	E11.5	C525	0.0317843	-52.3036	-77.6601	G1	Seuratcds	1196542	3526	3	0	3	C1_3	Fluidigm	3	NA	NA	NA	NA	NA	NA	NA	NA	NA	NA	NA	NA	NA	NA	NA	NA	0
C527	5	1436158	4200	E11.5	C527	0.0436686	-107.894	-100.767	G1	Seuratcds	1205560	4190	5	5	5	C1_5	Fluidigm	5	NA	NA	NA	NA	NA	NA	NA	NA	NA	NA	NA	NA	NA	NA	NA	NA	5
C531	5	1710198	5292	E11.5	C531	0.0297182	240.689	80.1221	S	Seuratcds	1205812	5284	5	0	5	C1_5	Fluidigm	5	NA	NA	NA	NA	NA	NA	NA	NA	NA	NA	NA	NA	NA	NA	NA	NA	0
C534	3	206602	3457	E11.5	C534	0.0807301	19.7642	-8.40178	S	Seuratcds	1176553	4018	3	0	3	C1_3	Fluidigm	3	NA	NA	NA	NA	NA	NA	NA	NA	NA	NA	NA	NA	NA	NA	NA	NA	0
C540	3	1213136	3463	E11.5	C540	0.0525209	-73.1949	-131.335	G1	Seuratcds	1204325	3456	3	0	3	C1_3	Fluidigm	3	NA	NA	NA	NA	NA	NA	NA	NA	NA	NA	NA	NA	NA	NA	NA	NA	0
C546	3	193145	3755	E11.5	C546	0.0943281	2.9971	-17.2622	S	Seuratcds	1175405	4331	3	0	3	C1_3	Fluidigm	3	NA	NA	NA	NA	NA	NA	NA	NA	NA	NA	NA	NA	NA	NA	NA	NA	0
C551	12	356816	2996	E11.5	C551	0.0536019	28.3168	11.02	S	Seuratcds	1186266	3101	12	5	12	C1_12	Fluidigm	12	NA	NA	NA	NA	NA	NA	NA	NA	NA	NA	NA	NA	NA	NA	NA	NA	5
C552	5	1989606	4002	E11.5	C552	0.026644	-157.436	-239.264	G1	Seuratcds	1209848	3990	5	0	5	C1_5	Fluidigm	5	NA	NA	NA	NA	NA	NA	NA	NA	NA	NA	NA	NA	NA	NA	NA	NA	0
C555	5	283158	3324	E11.5	C555	0.0693005	-10.9175	4.20196	G2M	Seuratcds	1181798	3528	5	0	5	C1_5	Fluidigm	5	NA	NA	NA	NA	NA	NA	NA	NA	NA	NA	NA	NA	NA	NA	NA	NA	0
C556	3	477763	3537	E11.5	C556	0.0684817	77.5405	-11.4778	S	Seuratcds	1188109	3538	3	0	3	C1_3	Fluidigm	3	NA	NA	NA	NA	NA	NA	NA	NA	NA	NA	NA	NA	NA	NA	NA	NA	0
C557	3	284954	2899	E11.5	C557	0.0823887	94.7223	-17.6742	S	Seuratcds	1179498	3170	3	0	3	C1_3	Fluidigm	3	NA	NA	NA	NA	NA	NA	NA	NA	NA	NA	NA	NA	NA	NA	NA	NA	0
C558	3	1898728	3976	E11.5	C558	0.0298942	-107.019	-199.271	G1	Seuratcds	1207433	3966	3	0	3	C1_3	Fluidigm	3	NA	NA	NA	NA	NA	NA	NA	NA	NA	NA	NA	NA	NA	NA	NA	NA	0
C560	1	1587789	4747	E11.5	C560	0.0320175	232.534	-105.012	S	Seuratcds	1205343	4722	1	0	1	C1_1	Fluidigm	1	NA	NA	NA	NA	NA	NA	NA	NA	NA	NA	NA	NA	NA	NA	NA	NA	0
C562	5	1864700	4888	E11.5	C562	0.0382555	-71.8528	400.358	G2M	Seuratcds	1207511	4875	5	5	5	C1_5	Fluidigm	5	NA	NA	NA	NA	NA	NA	NA	NA	NA	NA	NA	NA	NA	NA	NA	NA	5
C564	5	1697071	4689	E11.5	C564	0.0303517	-145.337	-170.896	G1	Seuratcds	1206300	4670	5	0	5	C1_5	Fluidigm	5	NA	NA	NA	NA	NA	NA	NA	NA	NA	NA	NA	NA	NA	NA	NA	NA	0
C567	3	370415	3600	E11.5	C567	0.0589312	-8.14525	-41.5097	G1	Seuratcds	1185440	3650	3	0	3	C1_3	Fluidigm	3	NA	NA	NA	NA	NA	NA	NA	NA	NA	NA	NA	NA	NA	NA	NA	NA	0
C568	3	703828	3498	E11.5	C568	0.0297686	-39.1404	-78.0111	G1	Seuratcds	1198561	3488	3	0	3	C1_3	Fluidigm	3	NA	NA	NA	NA	NA	NA	NA	NA	NA	NA	NA	NA	NA	NA	NA	NA	0
C569	3	343548	3392	E11.5	C569	0.0777126	-11.4367	-50.8661	G1	Seuratcds	1185938	3448	3	0	3	C1_3	Fluidigm	3	NA	NA	NA	NA	NA	NA	NA	NA	NA	NA	NA	NA	NA	NA	NA	NA	0
C573	0	1610279	5271	E11.5	C573	0.0352293	116.56	187.298	G2M	Seuratcds	1205619	5255	0	0	0	C1_0	Fluidigm	0	NA	NA	NA	NA	NA	NA	NA	NA	NA	NA	NA	NA	NA	NA	NA	NA	0
C574	12	1761065	5053	E11.5	C574	0.0312368	95.7634	252.933	G2M	Seuratcds	1207740	5036	12	0	12	C1_12	Fluidigm	12	NA	NA	NA	NA	NA	NA	NA	NA	NA	NA	NA	NA	NA	NA	NA	NA	0
C575	3	411561	4404	E11.5	C575	0.0519364	-32.4962	-41.088	G1	Seuratcds	1189978	4398	3	0	3	C1_3	Fluidigm	3	NA	NA	NA	NA	NA	NA	NA	NA	NA	NA	NA	NA	NA	NA	NA	NA	0
C577	3	453366	3027	E11.5	C577	0.0472047	-33.1661	-53.6624	G1	Seuratcds	1194196	3055	3	0	3	C1_3	Fluidigm	3	NA	NA	NA	NA	NA	NA	NA	NA	NA	NA	NA	NA	NA	NA	NA	NA	0
C580	5	1909353	4722	E11.5	C580	0.0338649	-140.678	-217.221	G1	Seuratcds	1209489	4706	5	0	5	C1_5	Fluidigm	5	NA	NA	NA	NA	NA	NA	NA	NA	NA	NA	NA	NA	NA	NA	NA	NA	0
C590	8	582530	3808	E11.5	C590	0.0355209	-11.2984	-50.2996	G1	Seuratcds	1196459	3799	8	0	8	C1_8	Fluidigm	8	NA	NA	NA	NA	NA	NA	NA	NA	NA	NA	NA	NA	NA	NA	NA	NA	0
C601	0	1903656	3601	E12.5	C601	0.018673	-174.808	-185.741	G1	Seuratcds	1209195	3588	0	0	0	C1_0	Fluidigm	0	NA	NA	NA	NA	NA	NA	NA	NA	NA	NA	NA	NA	NA	NA	NA	NA	0
C602	12	1621589	4592	E12.5	C602	0.0265887	-87.907	444.01	G2M	Seuratcds	1207052	4584	12	0	12	C1_12	Fluidigm	12	NA	NA	NA	NA	NA	NA	NA	NA	NA	NA	NA	NA	NA	NA	NA	NA	0
C603	3	1625081	3548	E12.5	C603	0.032999	-75.092	-160.555	G1	Seuratcds	1205809	3504	3	0	3	C1_3	Fluidigm	3	NA	NA	NA	NA	NA	NA	NA	NA	NA	NA	NA	NA	NA	NA	NA	NA	0
C605	0	2239123	3910	E12.5	C605	0.0300689	320.159	-164.517	S	Seuratcds	1209386	3847	0	0	0	C1_0	Fluidigm	0	NA	NA	NA	NA	NA	NA	NA	NA	NA	NA	NA	NA	NA	NA	NA	NA	0
C611	8	1499018	2823	E12.5	C611	0.0327541	-152.277	-143.901	G1	Seuratcds	1209879	2816	8	0	8	C1_8	Fluidigm	8	NA	NA	NA	NA	NA	NA	NA	NA	NA	NA	NA	NA	NA	NA	NA	NA	0
C617	8	513192	2668	E12.5	C617	0.0343146	-15.789	-30.6296	G1	Seuratcds	1194761	2680	8	0	8	C1_8	Fluidigm	8	NA	NA	NA	NA	NA	NA	NA	NA	NA	NA	NA	NA	NA	NA	NA	NA	0
C618	8	870430	2801	E12.5	C618	0.036752	-42.807	-90.7008	G1	Seuratcds	1200894	2788	8	0	8	C1_8	Fluidigm	8	NA	NA	NA	NA	NA	NA	NA	NA	NA	NA	NA	NA	NA	NA	NA	NA	0
C619	5	1430454	3881	E12.5	C619	0.0246397	41.4176	-109.62	S	Seuratcds	1205242	3873	5	0	5	C1_5	Fluidigm	5	NA	NA	NA	NA	NA	NA	NA	NA	NA	NA	NA	NA	NA	NA	NA	NA	0
C622	3	523011	2167	E12.5	C622	0.0297546	-38.3131	-20.6312	G1	Seuratcds	1194712	2199	3	0	3	C1_3	Fluidigm	3	NA	NA	NA	NA	NA	NA	NA	NA	NA	NA	NA	NA	NA	NA	NA	NA	0
C625	0	1974025	3696	E12.5	C625	0.0168767	-53.91	-214.097	G1	Seuratcds	1210650	3688	0	0	0	C1_0	Fluidigm	0	NA	NA	NA	NA	NA	NA	NA	NA	NA	NA	NA	NA	NA	NA	NA	NA	0
C626	8	464500	2196	E12.5	C626	0.0318278	-31.1978	-62.7163	G1	Seuratcds	1192587	2255	8	0	8	C1_8	Fluidigm	8	NA	NA	NA	NA	NA	NA	NA	NA	NA	NA	NA	NA	NA	NA	NA	NA	0
C627	0	2045707	5067	E12.5	C627	0.0222969	-99.502	293.662	G2M	Seuratcds	1214251	5051	0	0	0	C1_0	Fluidigm	0	NA	NA	NA	NA	NA	NA	NA	NA	NA	NA	NA	NA	NA	NA	NA	NA	0
C630	3	967249	2923	E12.5	C630	0.0304182	-36.929	-16.805	G1	Seuratcds	1201847	2888	3	0	3	C1_3	Fluidigm	3	NA	NA	NA	NA	NA	NA	NA	NA	NA	NA	NA	NA	NA	NA	NA	NA	0
C633	0	1656070	4191	E12.5	C633	0.0243607	-53.6423	228.836	G2M	Seuratcds	1209319	4159	0	0	0	C1_0	Fluidigm	0	NA	NA	NA	NA	NA	NA	NA	NA	NA	NA	NA	NA	NA	NA	NA	NA	0
C635	0	933451	2777	E12.5	C635	0.0251508	-8.95144	-58.6493	G1	Seuratcds	1196375	2772	0	0	0	C1_0	Fluidigm	0	NA	NA	NA	NA	NA	NA	NA	NA	NA	NA	NA	NA	NA	NA	NA	NA	0
C636	8	1142893	4205	E12.5	C636	0.0391296	-58.4181	-80.3256	G1	Seuratcds	1203210	4174	8	0	8	C1_8	Fluidigm	8	NA	NA	NA	NA	NA	NA	NA	NA	NA	NA	NA	NA	NA	NA	NA	NA	0
C643	6	2317401	2439	E12.5	C643	0.0260076	-126.679	-272.514	G1	Seuratcds	1211848	2321	6	5	6	C1_6	Fluidigm	6	NA	NA	NA	NA	NA	NA	NA	NA	NA	NA	NA	NA	NA	NA	NA	NA	5
C647	0	3000016	3128	E12.5	C647	0.0212929	-113.337	-159.913	G1	Seuratcds	1214455	2947	0	0	0	C1_0	Fluidigm	0	NA	NA	NA	NA	NA	NA	NA	NA	NA	NA	NA	NA	NA	NA	NA	NA	0
C650	0	620689	2451	E12.5	C650	0.0304919	-59.9297	-80.4422	G1	Seuratcds	1194331	2449	0	0	0	C1_0	Fluidigm	0	NA	NA	NA	NA	NA	NA	NA	NA	NA	NA	NA	NA	NA	NA	NA	NA	0
C654	0	2146257	3596	E12.5	C654	0.0226986	71.1331	-211.908	S	Seuratcds	1215663	3559	0	0	0	C1_0	Fluidigm	0	NA	NA	NA	NA	NA	NA	NA	NA	NA	NA	NA	NA	NA	NA	NA	NA	0
C655	8	427932	2092	E12.5	C655	0.0407752	-47.1752	-48.8212	G1	Seuratcds	1184367	2218	8	0	8	C1_8	Fluidigm	8	NA	NA	NA	NA	NA	NA	NA	NA	NA	NA	NA	NA	NA	NA	NA	NA	0
C658	0	353294	3310	E12.5	C658	0.0336971	-9.89409	-39.9162	G1	Seuratcds	1189976	3378	0	0	0	C1_0	Fluidigm	0	NA	NA	NA	NA	NA	NA	NA	NA	NA	NA	NA	NA	NA	NA	NA	NA	0
C659	0	1771916	2810	E12.5	C659	0.023259	-199.006	-151.059	G1	Seuratcds	1213885	2795	0	0	0	C1_0	Fluidigm	0	NA	NA	NA	NA	NA	NA	NA	NA	NA	NA	NA	NA	NA	NA	NA	NA	0
C660	0	2170248	2844	E12.5	C660	0.0200249	-178.862	-271.141	G1	Seuratcds	1214512	2797	0	0	0	C1_0	Fluidigm	0	NA	NA	NA	NA	NA	NA	NA	NA	NA	NA	NA	NA	NA	NA	NA	NA	0
C661	3	381727	2202	E12.5	C661	0.0436464	-23.8484	-33.7904	G1	Seuratcds	1191747	2327	3	5	3	C1_3	Fluidigm	3	NA	NA	NA	NA	NA	NA	NA	NA	NA	NA	NA	NA	NA	NA	NA	NA	5
C662	6	2129493	3118	E12.5	C662	0.0181517	-97.2209	-178.029	G1	Seuratcds	1213378	3092	6	5	6	C1_6	Fluidigm	6	NA	NA	NA	NA	NA	NA	NA	NA	NA	NA	NA	NA	NA	NA	NA	NA	5
C664	1	2285800	4029	E12.5	C664	0.0176162	26.9326	963.277	G2M	Seuratcds	1216916	3973	1	0	1	C1_1	Fluidigm	1	NA	NA	NA	NA	NA	NA	NA	NA	NA	NA	NA	NA	NA	NA	NA	NA	0
C666	1	1545336	4239	E12.5	C666	0.0221842	16.0597	935.357	G2M	Seuratcds	1207323	4231	1	0	1	C1_1	Fluidigm	1	NA	NA	NA	NA	NA	NA	NA	NA	NA	NA	NA	NA	NA	NA	NA	NA	0
C667	12	543523	3090	E12.5	C667	0.0354815	13.8506	143.982	G2M	Seuratcds	1198515	3097	12	0	12	C1_12	Fluidigm	12	NA	NA	NA	NA	NA	NA	NA	NA	NA	NA	NA	NA	NA	NA	NA	NA	0
C668	6	1935834	4468	E12.5	C668	0.0257584	-193.937	-179.458	G1	Seuratcds	1216019	4458	6	5	6	C1_6	Fluidigm	6	NA	NA	NA	NA	NA	NA	NA	NA	NA	NA	NA	NA	NA	NA	NA	NA	5
C670	0	2134607	2921	E12.5	C670	0.0269464	-240.692	-156.707	G1	Seuratcds	1213764	2888	0	0	0	C1_0	Fluidigm	0	NA	NA	NA	NA	NA	NA	NA	NA	NA	NA	NA	NA	NA	NA	NA	NA	0
C672	0	1688914	3366	E12.5	C672	0.017008	-158.302	-146.813	G1	Seuratcds	1214066	3358	0	0	0	C1_0	Fluidigm	0	NA	NA	NA	NA	NA	NA	NA	NA	NA	NA	NA	NA	NA	NA	NA	NA	0
C673	3	745702	2416	E12.5	C673	0.0328617	65.5304	-57.2305	S	Seuratcds	1200454	2412	3	0	3	C1_3	Fluidigm	3	NA	NA	NA	NA	NA	NA	NA	NA	NA	NA	NA	NA	NA	NA	NA	NA	0
C674	5	2363007	4082	E12.5	C674	0.0328069	-80.2022	-177.006	G1	Seuratcds	1207817	3915	5	0	5	C1_5	Fluidigm	5	NA	NA	NA	NA	NA	NA	NA	NA	NA	NA	NA	NA	NA	NA	NA	NA	0
C701	0	1076573	6433	E12.5	C701	0.0285508	61.8555	116.774	G2M	Seuratcds	1203207	6417	0	0	0	C1_0	Fluidigm	0	NA	NA	NA	NA	NA	NA	NA	NA	NA	NA	NA	NA	NA	NA	NA	NA	0
C708	8	1224279	4840	E12.5	C708	0.0374326	-71.3099	-143.528	G1	Seuratcds	1203827	4829	8	5	8	C1_8	Fluidigm	8	NA	NA	NA	NA	NA	NA	NA	NA	NA	NA	NA	NA	NA	NA	NA	NA	5
C709	5	944915	4791	E12.5	C709	0.0375039	-41.4935	343.152	G2M	Seuratcds	1201380	4781	5	0	5	C1_5	Fluidigm	5	NA	NA	NA	NA	NA	NA	NA	NA	NA	NA	NA	NA	NA	NA	NA	NA	0
C710	12	725742	4050	E12.5	C710	0.034978	-10.7112	29.9016	G2M	Seuratcds	1200755	4012	12	0	12	C1_12	Fluidigm	12	NA	NA	NA	NA	NA	NA	NA	NA	NA	NA	NA	NA	NA	NA	NA	NA	0
C711	3	114281	2213	E12.5	C711	0.0485558	-8.47448	-15.6766	G1	Seuratcds	1168490	5848	3	5	3	C1_3	Fluidigm	3	NA	NA	NA	NA	NA	NA	NA	NA	NA	NA	NA	NA	NA	NA	NA	NA	5
C712	5	824221	3353	E12.5	C712	0.0452876	-40.4246	-75.1663	G1	Seuratcds	1199646	3345	5	5	5	C1_5	Fluidigm	5	NA	NA	NA	NA	NA	NA	NA	NA	NA	NA	NA	NA	NA	NA	NA	NA	5
C713	6	2100946	6127	E12.5	C713	0.0309046	-34.2923	-158.405	G1	Seuratcds	1207344	6108	6	5	6	C1_6	Fluidigm	6	NA	NA	NA	NA	NA	NA	NA	NA	NA	NA	NA	NA	NA	NA	NA	NA	5
C715	6	1166452	4017	E12.5	C715	0.0275108	-82.1502	-103.358	G1	Seuratcds	1202978	4004	6	5	6	C1_6	Fluidigm	6	NA	NA	NA	NA	NA	NA	NA	NA	NA	NA	NA	NA	NA	NA	NA	NA	5
C716	6	1037985	7268	E12.5	C716	0.0343579	95.5612	-2.27665	S	Seuratcds	1201737	7244	6	5	6	C1_6	Fluidigm	6	NA	NA	NA	NA	NA	NA	NA	NA	NA	NA	NA	NA	NA	NA	NA	NA	5
C721	6	833652	5428	E12.5	C721	0.028687	-63.1057	-83.1831	G1	Seuratcds	1198057	5413	6	5	6	C1_6	Fluidigm	6	NA	NA	NA	NA	NA	NA	NA	NA	NA	NA	NA	NA	NA	NA	NA	NA	5
C722	5	1248649	6631	E12.5	C722	0.0773524	-33.6124	-60.3212	G1	Seuratcds	1201766	6591	5	5	5	C1_5	Fluidigm	5	NA	NA	NA	NA	NA	NA	NA	NA	NA	NA	NA	NA	NA	NA	NA	NA	5
C723	6	1226376	4771	E12.5	C723	0.0319347	-83.544	-105.514	G1	Seuratcds	1200939	4709	6	5	6	C1_6	Fluidigm	6	NA	NA	NA	NA	NA	NA	NA	NA	NA	NA	NA	NA	NA	NA	NA	NA	5
C724	8	1261575	3437	E12.5	C724	0.031123	-79.9837	-99.9063	G1	Seuratcds	1204055	3429	8	0	8	C1_8	Fluidigm	8	NA	NA	NA	NA	NA	NA	NA	NA	NA	NA	NA	NA	NA	NA	NA	NA	0
C725	5	1378605	5627	E12.5	C725	0.0292259	350.76	-92.049	S	Seuratcds	1204763	5614	5	0	5	C1_5	Fluidigm	5	NA	NA	NA	NA	NA	NA	NA	NA	NA	NA	NA	NA	NA	NA	NA	NA	0
C726	8	1318682	4230	E12.5	C726	0.0411145	-94.7184	-141.616	G1	Seuratcds	1205129	4208	8	5	8	C1_8	Fluidigm	8	NA	NA	NA	NA	NA	NA	NA	NA	NA	NA	NA	NA	NA	NA	NA	NA	5
C727	6	1757070	6184	E12.5	C727	0.0279579	233.707	-123.999	S	Seuratcds	1208113	6177	6	5	6	C1_6	Fluidigm	6	NA	NA	NA	NA	NA	NA	NA	NA	NA	NA	NA	NA	NA	NA	NA	NA	5
C728	8	1365528	5044	E12.5	C728	0.0328415	-91.4619	-128.045	G1	Seuratcds	1202959	5030	8	0	8	C1_8	Fluidigm	8	NA	NA	NA	NA	NA	NA	NA	NA	NA	NA	NA	NA	NA	NA	NA	NA	0
C729	6	1596522	4918	E12.5	C729	0.0255424	-94.2786	-167.343	G1	Seuratcds	1206615	4900	6	5	6	C1_6	Fluidigm	6	NA	NA	NA	NA	NA	NA	NA	NA	NA	NA	NA	NA	NA	NA	NA	NA	5
C731	0	1186109	3264	E12.5	C731	0.0248577	-79.9689	-99.668	G1	Seuratcds	1202985	3258	0	0	0	C1_0	Fluidigm	0	NA	NA	NA	NA	NA	NA	NA	NA	NA	NA	NA	NA	NA	NA	NA	NA	0
C736	5	1466292	5723	E12.5	C736	0.0325044	-33.9461	75.1481	G2M	Seuratcds	1205041	5710	5	0	5	C1_5	Fluidigm	5	NA	NA	NA	NA	NA	NA	NA	NA	NA	NA	NA	NA	NA	NA	NA	NA	0
C737	8	990904	3302	E12.5	C737	0.0322998	-54.8683	-110.988	G1	Seuratcds	1202288	3296	8	0	8	C1_8	Fluidigm	8	NA	NA	NA	NA	NA	NA	NA	NA	NA	NA	NA	NA	NA	NA	NA	NA	0
C739	1	1914783	5916	E12.5	C739	0.0305737	102.838	-174.526	S	Seuratcds	1206983	5894	1	1	1	C1_1	Fluidigm	1	NA	NA	NA	NA	NA	NA	NA	NA	NA	NA	NA	NA	NA	NA	NA	NA	1
C740	6	1221227	5368	E12.5	C740	0.0369276	-72.8725	-105.005	G1	Seuratcds	1203763	5343	6	5	6	C1_6	Fluidigm	6	NA	NA	NA	NA	NA	NA	NA	NA	NA	NA	NA	NA	NA	NA	NA	NA	5
C743	6	1290172	3897	E12.5	C743	0.0252594	-97.9865	-144.749	G1	Seuratcds	1204736	3886	6	0	6	C1_6	Fluidigm	6	NA	NA	NA	NA	NA	NA	NA	NA	NA	NA	NA	NA	NA	NA	NA	NA	0
C744	5	1345220	4264	E12.5	C744	0.0376652	-97.4246	-131.411	G1	Seuratcds	1204593	4255	5	5	5	C1_5	Fluidigm	5	NA	NA	NA	NA	NA	NA	NA	NA	NA	NA	NA	NA	NA	NA	NA	NA	5
C752	0	1304206	4700	E12.5	C752	0.0255872	-78.3641	109.979	G2M	Seuratcds	1204228	4680	0	0	0	C1_0	Fluidigm	0	NA	NA	NA	NA	NA	NA	NA	NA	NA	NA	NA	NA	NA	NA	NA	NA	0
C753	6	1098627	4431	E12.5	C753	0.0348617	-31.4636	-127.664	G1	Seuratcds	1203318	4425	6	0	6	C1_6	Fluidigm	6	NA	NA	NA	NA	NA	NA	NA	NA	NA	NA	NA	NA	NA	NA	NA	NA	0
C755	5	1845417	6547	E12.5	C755	0.0723538	86.4923	-38.2367	S	Seuratcds	1204683	6504	5	0	5	C1_5	Fluidigm	5	NA	NA	NA	NA	NA	NA	NA	NA	NA	NA	NA	NA	NA	NA	NA	NA	0
C757	12	1384264	4117	E12.5	C757	0.0399006	-76.6544	-125.446	G1	Seuratcds	1206086	4104	12	0	12	C1_12	Fluidigm	12	NA	NA	NA	NA	NA	NA	NA	NA	NA	NA	NA	NA	NA	NA	NA	NA	0
C762	6	1829743	6999	E12.5	C762	0.0287592	7.02355	427.936	G2M	Seuratcds	1207092	6981	6	0	6	C1_6	Fluidigm	6	NA	NA	NA	NA	NA	NA	NA	NA	NA	NA	NA	NA	NA	NA	NA	NA	0
C763	3	1064180	3535	E12.5	C763	0.040464	-44.7316	-98.6288	G1	Seuratcds	1202278	3525	3	0	3	C1_3	Fluidigm	3	NA	NA	NA	NA	NA	NA	NA	NA	NA	NA	NA	NA	NA	NA	NA	NA	0
C766	6	2132323	4653	E12.5	C766	0.0228971	-118.337	-191.803	G1	Seuratcds	1210689	4638	6	5	6	C1_6	Fluidigm	6	NA	NA	NA	NA	NA	NA	NA	NA	NA	NA	NA	NA	NA	NA	NA	NA	5
C769	6	1338401	4115	E12.5	C769	0.0394	-12.6412	-122.48	G1	Seuratcds	1205122	4109	6	5	6	C1_6	Fluidigm	6	NA	NA	NA	NA	NA	NA	NA	NA	NA	NA	NA	NA	NA	NA	NA	NA	5
C770	0	1236407	3564	E12.5	C770	0.0288942	-40.9384	-128.685	G1	Seuratcds	1204790	3561	0	0	0	C1_0	Fluidigm	0	NA	NA	NA	NA	NA	NA	NA	NA	NA	NA	NA	NA	NA	NA	NA	NA	0
C772	0	1993318	6241	E12.5	C772	0.0273975	67.0006	590.988	G2M	Seuratcds	1208369	6226	0	0	0	C1_0	Fluidigm	0	NA	NA	NA	NA	NA	NA	NA	NA	NA	NA	NA	NA	NA	NA	NA	NA	0
C773	12	849845	5008	E12.5	C773	0.0361795	163.614	-5.91476	S	Seuratcds	1198893	4953	12	0	12	C1_12	Fluidigm	12	NA	NA	NA	NA	NA	NA	NA	NA	NA	NA	NA	NA	NA	NA	NA	NA	0
C775	5	1319616	4125	E12.5	C775	0.0381171	-83.115	-129.443	G1	Seuratcds	1204142	4114	5	5	5	C1_5	Fluidigm	5	NA	NA	NA	NA	NA	NA	NA	NA	NA	NA	NA	NA	NA	NA	NA	NA	5
C780	6	1953638	6073	E12.5	C780	0.0245931	208.668	124.05	S	Seuratcds	1208760	6058	6	5	6	C1_6	Fluidigm	6	NA	NA	NA	NA	NA	NA	NA	NA	NA	NA	NA	NA	NA	NA	NA	NA	5
C781	5	1113091	4992	E12.5	C781	0.0344734	-76.7115	-106.056	G1	Seuratcds	1203540	4963	5	5	5	C1_5	Fluidigm	5	NA	NA	NA	NA	NA	NA	NA	NA	NA	NA	NA	NA	NA	NA	NA	NA	5
C784	3	762152	3054	E12.5	C784	0.0590302	-42.7957	-73.5416	G1	Seuratcds	1197317	3043	3	0	3	C1_3	Fluidigm	3	NA	NA	NA	NA	NA	NA	NA	NA	NA	NA	NA	NA	NA	NA	NA	NA	0
C788	0	1444742	4128	E12.5	C788	0.0394818	-30.9587	197.949	G2M	Seuratcds	1203064	4113	0	0	0	C1_0	Fluidigm	0	NA	NA	NA	NA	NA	NA	NA	NA	NA	NA	NA	NA	NA	NA	NA	NA	0
C790	1	995331	3936	E12.5	C790	0.0298514	-45.8522	-97.8925	G1	Seuratcds	1201573	3924	1	0	1	C1_1	Fluidigm	1	NA	NA	NA	NA	NA	NA	NA	NA	NA	NA	NA	NA	NA	NA	NA	NA	0
C792	3	289545	2494	E12.5	C792	0.0451122	-20.8734	-36.0504	G1	Seuratcds	1188053	2792	3	0	3	C1_3	Fluidigm	3	NA	NA	NA	NA	NA	NA	NA	NA	NA	NA	NA	NA	NA	NA	NA	NA	0
C794	8	812197	3093	E12.5	C794	0.0406822	-50.0563	-98.8762	G1	Seuratcds	1199696	3090	8	0	8	C1_8	Fluidigm	8	NA	NA	NA	NA	NA	NA	NA	NA	NA	NA	NA	NA	NA	NA	NA	NA	0
E17.5_EYFP_AAACCAACACAATTAC-1	E17.5_EYFP	4406	2080	NA	NA	8.12528	-0.144841	-0.0855953	G1	E17.5_EYFP	16054	3470	NA	2	3	10x_3	10x	NA	26622	18352	1146	671	2494	1381	230	175	0.733572	0.58	6.12845	0.69	0.539322	0.460678	3	3	2
E17.5_EYFP_AAAGCCGCAAAGCGCA-1	E17.5_EYFP	31472	6432	NA	NA	3.83833	-0.0253207	-0.26151	G1	E17.5_EYFP	18339	5902	NA	4	2	10x_2	10x	NA	4317	3977	19810	4832	6384	2558	1316	672	0.880597	0.92	4.17872	0.08	0.681312	0.318688	2	2	4
E17.5_EYFP_AAAGCTTGTAGGTTAT-1	E17.5_EYFP	13458	3603	NA	NA	10.5736	-0.161964	-0.167605	G1	E17.5_EYFP	16941	3582	NA	2	3	10x_3	10x	NA	39628	25027	1909	1197	9096	2667	684	490	0.84898	0.88	5.31701	0.39	0.509143	0.490857	3	3	2
E17.5_EYFP_AAAGGACGTAACGGGA-1	E17.5_EYFP	32355	6747	NA	NA	5.47365	-0.226217	-0.306854	G1	E17.5_EYFP	18300	6001	NA	4	2	10x_2	10x	NA	85210	41944	18244	4865	8571	3086	1480	784	0.819913	0.82	5.22329	0.35	0.420574	0.579426	2	2	4
E17.5_EYFP_AAAGGACGTACAAAGA-1	E17.5_EYFP	10152	3012	NA	NA	8.63869	-0.163783	-0.144208	G1	E17.5_EYFP	17093	2999	NA	2	3	10x_3	10x	NA	33894	22002	1667	972	6724	2222	520	368	0.721819	0.54	6.05893	0.67	0.5	0.5	3	3	2
E17.5_EYFP_AAAGGTTAGTGCTGTG-1	E17.5_EYFP	23018	5371	NA	NA	4.51386	0.135216	-0.206292	S	E17.5_EYFP	18314	5348	NA	4	2	10x_2	10x	NA	30698	20459	14005	3889	5028	2088	975	543	0.790368	0.76	5.08572	0.31	0.5	0.5	2	2	4
E17.5_EYFP_AACCTTAAGTAACCAC-1	E17.5_EYFP	21240	4986	NA	NA	7.11394	0.526393	-0.0544301	S	E17.5_EYFP	18437	4964	NA	1	7	10x_7	10x	NA	25868	17658	12129	3530	5006	1941	854	491	0.813554	0.81	5.61914	0.52	0.537212	0.462788	7	7	1
E17.5_EYFP_AACTCACAGAAAGCAT-1	E17.5_EYFP	29033	5853	NA	NA	7.82558	0.349028	-0.0975001	S	E17.5_EYFP	18587	5629	NA	4	2	10x_2	10x	NA	27917	18542	10474	3646	13171	3372	1567	865	0.786974	0.75	5.41724	0.44	0.549979	0.450021	2	2	4
E17.5_EYFP_AACTCACAGAAGGTGC-1	E17.5_EYFP	9923	3124	NA	NA	7.30626	-0.182658	-0.199652	G1	E17.5_EYFP	17038	3124	NA	2	3	10x_3	10x	NA	34641	20498	1520	972	6797	2276	554	401	0.465249	0.03	5.81453	0.59	0.47402	0.52598	3	3	2
E17.5_EYFP_AACTCACAGGCTACAT-1	E17.5_EYFP	15524	4195	NA	NA	3.37542	-0.101193	-0.198373	G1	E17.5_EYFP	16927	4161	NA	4	9	10x_9	10x	NA	12150	9369	3198	1782	10475	2926	846	566	0.544823	0.07	6.77302	0.86	0.48592	0.51408	9	9	4
E17.5_EYFP_AAGAATCAGTCAGGCC-1	E17.5_EYFP	22763	4339	NA	NA	3.70338	-0.226921	-0.23958	G1	E17.5_EYFP	18439	4303	NA	3	0	10x_0	10x	NA	36560	23672	2772	1534	17214	3343	1177	717	0.697508	0.47	4.6145	0.17	0.489434	0.510566	0	0	3
E17.5_EYFP_AAGGTATAGGCTGTCA-1	E17.5_EYFP	35039	6681	NA	NA	4.69762	0.480795	1.10898	G2M	E17.5_EYFP	17854	5374	NA	3	0	10x_0	10x	NA	55585	29802	21480	5004	6770	2740	1465	739	0.665647	0.35	5.08467	0.31	0.589784	0.410216	0	0	3
E17.5_EYFP_AAGTGCAAGGCCATCA-1	E17.5_EYFP	12464	3936	NA	NA	4.89409	-0.0783861	-0.174427	G1	E17.5_EYFP	16764	3910	NA	7	8_0	10x_8_0	10x	NA	3514	3060	6416	2575	3900	1657	602	370	0.444444	0.02	6.62832	0.83	0.506394	0.493606	8	8_0	7
E17.5_EYFP_AAGTTACGTCCAAATG-1	E17.5_EYFP	22300	4937	NA	NA	5.92825	0.524082	0.401152	S	E17.5_EYFP	18405	4895	NA	2	3	10x_3	10x	NA	30550	20769	4206	2056	14516	3500	1235	793	0.625714	0.23	5.26141	0.36	0.665254	0.334746	3	3	2
E17.5_EYFP_AATCATGTCCCGTTGT-1	E17.5_EYFP	23504	5091	NA	NA	9.82386	0.292853	0.75784	G2M	E17.5_EYFP	18433	5064	NA	1	5	10x_5	10x	NA	35200	22773	8443	2871	10031	2963	970	635	0.716001	0.52	5.67488	0.54	0.63853	0.36147	5	5	1
E17.5_EYFP_AATCCGTAGAGAAGGG-1	E17.5_EYFP	9976	3385	NA	NA	5.34282	0.0125078	0.914302	G2M	E17.5_EYFP	16995	3358	NA	5	8_1	10x_8_1	10x	NA	32573	18158	6057	2288	1851	1110	405	255	0.615412	0.21	5.08361	0.31	0.520286	0.479714	8	8_1	5
E17.5_EYFP_AATTACCCAACTAGCC-1	E17.5_EYFP	8984	3002	NA	NA	9.81745	-0.141975	-0.137056	G1	E17.5_EYFP	16721	3107	NA	2	0	10x_0	10x	NA	28705	19197	1540	895	5820	2205	465	325	0.832489	0.84	6.17007	0.71	0.600054	0.399946	0	0	2
E17.5_EYFP_AATTAGGCAGTAGGTG-1	E17.5_EYFP	16498	4229	NA	NA	7.51	-0.261804	-0.141758	G1	E17.5_EYFP	17140	4216	NA	1	7	10x_7	10x	NA	10708	8732	10346	3069	3021	1386	704	416	0.693431	0.45	6.15948	0.71	0.728754	0.271246	7	7	1
E17.5_EYFP_AATTGTGTCGAGGTGG-1	E17.5_EYFP	25707	5667	NA	NA	10.9737	-0.142296	-0.283905	G1	E17.5_EYFP	18125	5621	NA	6	6_0	10x_6_0	10x	NA	84079	40951	12031	3500	8394	3091	1126	667	0.709918	0.51	4.93361	0.26	0.5	0.5	6	6_0	6
E17.5_EYFP_ACAGGTAAGTCACTCC-1	E17.5_EYFP	15641	3617	NA	NA	3.3246	-0.130003	-0.219084	G1	E17.5_EYFP	17095	3603	NA	2	3	10x_3	10x	NA	22894	15712	1816	1028	11979	2892	901	576	0.764327	0.69	6.09842	0.68	0.478886	0.521114	3	3	2
E17.5_EYFP_ACCCGTAAGTGAGCGG-1	E17.5_EYFP	11849	3686	NA	NA	13.0813	0.496672	0.239019	S	E17.5_EYFP	16747	3675	NA	1	5	10x_5	10x	NA	27477	18303	4097	1898	5008	1917	573	401	0.906161	0.94	6.19205	0.72	0.465752	0.534248	5	5	1
E17.5_EYFP_ACCTCACTCAGTGAAG-1	E17.5_EYFP	9384	3225	NA	NA	4.07076	-0.149318	-0.216869	G1	E17.5_EYFP	16912	3263	NA	2	3	10x_3	10x	NA	31242	20682	2213	1365	5814	2064	569	396	0.944551	0.96	5.94976	0.64	0.565451	0.434549	3	3	2
E17.5_EYFP_ACCTGGATCTGCAACG-1	E17.5_EYFP	31689	6502	NA	NA	3.77734	-0.176693	-0.255528	G1	E17.5_EYFP	18265	5920	NA	4	2	10x_2	10x	NA	45123	25348	17865	4647	8591	2977	1434	721	0.811467	0.8	5.8729	0.61	0.576305	0.423695	2	2	4
E17.5_EYFP_ACCTGGTCACGGTTTA-1	E17.5_EYFP	35276	6320	NA	NA	7.08981	-0.304249	-0.177665	G1	E17.5_EYFP	17943	4952	NA	3	3	10x_3	10x	NA	56655	33363	19502	4600	9647	2956	1443	744	0.720364	0.54	5.59872	0.51	0.526728	0.473272	3	3	3
E17.5_EYFP_ACGTCCAAGACTTACA-1	E17.5_EYFP	9560	3182	NA	NA	4.80126	-0.0542929	-0.235707	G1	E17.5_EYFP	16852	3184	NA	7	8_0	10x_8_0	10x	NA	25106	15173	4585	1903	3413	1392	445	289	0.797756	0.77	5.61713	0.52	0.496553	0.503447	8	8_0	7
E17.5_EYFP_ACTCGCTTCCAAACAC-1	E17.5_EYFP	37249	6908	NA	NA	4.85651	-0.0271401	1.43904	G2M	E17.5_EYFP	17446	5070	NA	4	2	10x_2	10x	NA	54188	29615	21484	5167	9131	3162	1671	861	0.776908	0.72	4.76158	0.21	0.5	0.5	2	2	4
E17.5_EYFP_ACTCGCTTCCTTGAGG-1	E17.5_EYFP	26530	5391	NA	NA	2.95515	0.0855556	-0.235183	S	E17.5_EYFP	18360	5301	NA	4	2	10x_2	10x	NA	14258	11025	6355	2856	16747	3633	1514	870	0.580991	0.13	5.91543	0.62	0.598672	0.401328	2	2	4
E17.5_EYFP_ACTGAAACAGCAAGAT-1	E17.5_EYFP	5218	2222	NA	NA	7.83825	-0.184331	-0.143505	G1	E17.5_EYFP	16125	3321	NA	2	3	10x_3	10x	NA	13794	10305	1125	749	3215	1492	269	215	0.680821	0.41	6.59928	0.83	0.5	0.5	3	3	2
E17.5_EYFP_AGAACAAGTTTGGCGG-1	E17.5_EYFP	10837	3511	NA	NA	7.12374	0.0639151	-0.173205	S	E17.5_EYFP	17211	3499	NA	2	3	10x_3	10x	NA	30741	19938	5426	2128	3372	1583	484	307	0.644189	0.28	5.63585	0.53	0.608419	0.391581	3	3	2
E17.5_EYFP_AGAATCGAGCCATCAG-1	E17.5_EYFP	17928	4689	NA	NA	6.47033	-0.185478	-0.22875	G1	E17.5_EYFP	17853	4665	NA	0	0	10x_0	10x	NA	42894	26955	4281	2244	10771	2998	945	628	0.804407	0.79	4.4143	0.12	0.5	0.5	0	0	0
E17.5_EYFP_AGATGCTTCAAACTCA-1	E17.5_EYFP	5519	2161	NA	NA	0	-0.162938	-0.115837	G1	E17.5_EYFP	16308	3181	NA	0	2	10x_2	10x	NA	24524	16354	684	443	4452	1730	264	223	0.752657	0.66	3.62974	0.03	0.643298	0.356702	2	2	0
E17.5_EYFP_AGATGCTTCCAACTGG-1	E17.5_EYFP	9629	3290	NA	NA	11.5484	-0.174971	-0.205986	G1	E17.5_EYFP	17134	3273	NA	1	5	10x_5	10x	NA	36071	21680	3481	1615	4011	1848	424	303	0.775535	0.71	6.53471	0.82	0.775453	0.224547	5	5	1
E17.5_EYFP_AGCAATACACAAAGAC-1	E17.5_EYFP	18458	4424	NA	NA	6.76671	-0.0910038	-0.317369	G1	E17.5_EYFP	18080	4393	NA	3	0	10x_0	10x	NA	33095	22300	10799	3040	4058	1803	797	473	0.81933	0.82	4.78606	0.22	0.668929	0.331071	0	0	3
E17.5_EYFP_AGGAACGGTTGCGGAT-1	E17.5_EYFP	29284	6399	NA	NA	5.35787	0.882995	0.27117	S	E17.5_EYFP	18589	6082	NA	7	8_0	10x_8_0	10x	NA	46550	26671	17434	4693	6571	2555	1332	711	0.875	0.91	4.28081	0.09	0.514901	0.485099	8	8_0	7
E17.5_EYFP_AGGTTAGAGGCGCTAC-1	E17.5_EYFP	18838	4860	NA	NA	4.96337	0.0673514	-0.166168	S	E17.5_EYFP	18291	4844	NA	4	2	10x_2	10x	NA	21816	15847	4756	2406	11224	3124	1195	689	0.699593	0.47	5.56739	0.49	0.598768	0.401232	2	2	4
E17.5_EYFP_AGGTTAGAGTAACCAC-1	E17.5_EYFP	12058	3390	NA	NA	5.22475	-0.196543	-0.193985	G1	E17.5_EYFP	16729	3366	NA	2	3	10x_3	10x	NA	22237	15959	2050	1166	8363	2493	648	461	0.722202	0.55	6.35591	0.76	0.5	0.5	3	3	2
E17.5_EYFP_AGTAACGAGATAAAGC-1	E17.5_EYFP	22309	5355	NA	NA	4.9173	0.498133	-0.165126	S	E17.5_EYFP	18349	5323	NA	6	6_0	10x_6_0	10x	NA	31619	20138	14464	3966	3941	1899	1018	517	0.684533	0.42	4.27312	0.09	0.453777	0.546223	6	6_0	6
E17.5_EYFP_ATAAGCCTCCTTAAGA-1	E17.5_EYFP	9544	3408	NA	NA	7.60687	-0.111264	-0.19181	G1	E17.5_EYFP	17075	3397	NA	0	2	10x_2	10x	NA	21771	15450	4427	2029	3384	1531	483	313	0.753	0.66	6.49279	0.8	0.5	0.5	2	2	0
E17.5_EYFP_ATAGCATGTTAGAGGG-1	E17.5_EYFP	5576	2251	NA	NA	12.8766	-0.0263922	-0.162147	G1	E17.5_EYFP	16121	3202	NA	2	3	10x_3	10x	NA	37683	23399	1004	692	3364	1576	302	235	0.655474	0.31	6.52384	0.81	0.5	0.5	3	3	2
E17.5_EYFP_ATATGCTCAAACAACA-1	E17.5_EYFP	17909	4790	NA	NA	3.85281	-0.167589	-0.235473	G1	E17.5_EYFP	17832	4759	NA	4	2	10x_2	10x	NA	11073	9334	10475	3266	4478	2002	867	500	0.853465	0.89	5.52781	0.47	0.577641	0.422359	2	2	4
E17.5_EYFP_ATATGGTGTTAAGTGT-1	E17.5_EYFP	14749	4328	NA	NA	3.53244	-0.126516	-0.16271	G1	E17.5_EYFP	16906	4312	NA	4	2	10x_2	10x	NA	21078	15547	8536	2928	4000	1754	696	424	0.777927	0.72	4.8263	0.23	0.528893	0.471107	2	2	4
E17.5_EYFP_ATCACACAGGGTGAGT-1	E17.5_EYFP	6054	2347	NA	NA	12.5372	-0.0462217	-0.0963635	G1	E17.5_EYFP	16091	3149	NA	2	3	10x_3	10x	NA	7449	6465	1189	703	3590	1641	324	231	0.662971	0.34	6.17451	0.71	0.5	0.5	3	3	2
E17.5_EYFP_ATCACACAGTAACGGA-1	E17.5_EYFP	9178	3158	NA	NA	7.2238	-0.121225	-0.139599	G1	E17.5_EYFP	16842	3215	NA	6	6_0	10x_6_0	10x	NA	22630	15639	2224	1203	5249	2086	633	391	0.564901	0.11	5.64311	0.53	0.475891	0.524109	6	6_0	6
E17.5_EYFP_ATGACTCAGACACTTA-1	E17.5_EYFP	17804	4535	NA	NA	8.87441	-0.138966	1.07767	G2M	E17.5_EYFP	17761	4511	NA	1	7	10x_7	10x	NA	54676	29614	10501	3168	3487	1750	747	439	0.784259	0.74	5.16213	0.34	0.763878	0.236122	7	7	1
E17.5_EYFP_ATGGTCTAGGATGATG-1	E17.5_EYFP	12048	3742	NA	NA	9.69456	0.310546	-0.0557114	S	E17.5_EYFP	16740	3694	NA	5	8_1	10x_8_1	10x	NA	33516	19563	6494	2469	2938	1494	518	321	0.727528	0.56	6.05027	0.67	0.521064	0.478936	8	8_1	5
E17.5_EYFP_ATGTCAATCGTGCTTC-1	E17.5_EYFP	24033	5199	NA	NA	6.39953	-0.0283257	1.30124	G2M	E17.5_EYFP	18427	5162	NA	1	6_1	10x_6_1	10x	NA	19239	11286	16326	4137	2749	1371	902	475	0.46457	0.03	4.67731	0.19	0.582601	0.417399	6	6_1	1
E17.5_EYFP_CAAAGTGAGGTGAAAT-1	E17.5_EYFP	26522	5448	NA	NA	6.73403	-0.0914273	-0.193817	G1	E17.5_EYFP	18149	5354	NA	1	7	10x_7	10x	NA	32136	20164	16191	4007	5288	2118	1070	559	0.661039	0.34	4.62552	0.17	0.506985	0.493015	7	7	1
E17.5_EYFP_CAACAGGCAATCCCTT-1	E17.5_EYFP	25146	5655	NA	NA	5.60725	-0.141484	-0.22506	G1	E17.5_EYFP	17990	5619	NA	3	0	10x_0	10x	NA	42773	26371	14364	4014	6169	2378	1090	604	0.853792	0.89	4.35709	0.1	0.50784	0.49216	0	0	3
E17.5_EYFP_CAACAGGCAGGCTTCG-1	E17.5_EYFP	16241	4665	NA	NA	6.36045	-0.166539	-0.23355	G1	E17.5_EYFP	17008	4644	NA	3	0	10x_0	10x	NA	42160	26693	8548	2980	4655	2067	755	485	0.801246	0.79	4.93982	0.27	0.472743	0.527257	0	0	3
E17.5_EYFP_CAACCCGCACAGCCTG-1	E17.5_EYFP	26124	5518	NA	NA	6.98974	-0.149684	-0.286101	G1	E17.5_EYFP	18178	5466	NA	5	6_0	10x_6_0	10x	NA	58500	32870	14378	3746	6983	2498	1142	624	0.711162	0.51	5.38854	0.42	0.494834	0.505166	6	6_0	5
E17.5_EYFP_CAAGGGAGTGATTACG-1	E17.5_EYFP	7486	2810	NA	NA	6.53219	-0.190174	-0.186845	G1	E17.5_EYFP	16751	3108	NA	4	2	10x_2	10x	NA	22814	16079	4002	1753	2105	1110	360	246	0.769573	0.7	6.35771	0.77	0.450217	0.549783	2	2	4
E17.5_EYFP_CACCTCAGTTACATCC-1	E17.5_EYFP	16538	4849	NA	NA	6.56065	0.50301	0.720843	G2M	E17.5_EYFP	17031	4826	NA	4	2	10x_2	10x	NA	51440	28801	9317	3327	4039	1899	707	447	0.762575	0.68	4.67292	0.18	0.5	0.5	2	2	4
E17.5_EYFP_CACTTTGTCATCCTGC-1	E17.5_EYFP	7762	2637	NA	NA	10.822	-0.0973877	-0.0774287	G1	E17.5_EYFP	16514	2901	NA	2	0	10x_0	10x	NA	26476	18433	1834	1004	4448	1739	383	288	0.812667	0.8	5.29427	0.38	0.5	0.5	0	0	2
E17.5_EYFP_CAGGGCTTCTAAGTGC-1	E17.5_EYFP	20145	4566	NA	NA	7.1581	-0.262943	-0.126122	G1	E17.5_EYFP	18407	4548	NA	1	7	10x_7	10x	NA	5187	4516	9712	2885	6637	2183	860	539	0.519178	0.05	7.18809	0.91	0.400531	0.599469	7	7	1
E17.5_EYFP_CAGTACCCATAGCGGA-1	E17.5_EYFP	16790	4268	NA	NA	3.8237	-0.113608	-0.19243	G1	E17.5_EYFP	17156	4244	NA	3	0	10x_0	10x	NA	3084	2820	3443	1771	11082	2930	916	592	0.638968	0.26	9.6475	0.99	0.46436	0.53564	0	0	3
E17.5_EYFP_CATTCCTCAAGATTCT-1	E17.5_EYFP	34866	6195	NA	NA	5.30316	-0.210883	-0.285449	G1	E17.5_EYFP	17904	4870	NA	4	2	10x_2	10x	NA	49779	28957	19422	4281	9767	3051	1373	733	0.729156	0.57	6.29345	0.75	0.5	0.5	2	2	4
E17.5_EYFP_CATTGTGCAAGGTGGC-1	E17.5_EYFP	5862	2403	NA	NA	10.3037	-0.129105	-0.102675	G1	E17.5_EYFP	16344	3199	NA	3	2	10x_2	10x	NA	27630	17011	3233	1571	1399	839	296	199	1.32614	1	4.37185	0.11	0.525633	0.474367	2	2	3
E17.5_EYFP_CCATATTTCATTGTTC-1	E17.5_EYFP	26836	5822	NA	NA	3.89402	0.149875	-0.217872	S	E17.5_EYFP	18207	5733	NA	3	2	10x_2	10x	NA	37763	23912	15180	4066	6943	2488	1274	608	0.7113	0.51	5.29388	0.38	0.5	0.5	2	2	3
E17.5_EYFP_CCATCATGTTTGCGCC-1	E17.5_EYFP	17251	4903	NA	NA	3.50125	-0.280115	-0.292574	G1	E17.5_EYFP	17365	4875	NA	2	3	10x_3	10x	NA	34648	22667	8193	3121	6462	2304	841	509	0.75045	0.65	4.79888	0.23	0.5	0.5	3	3	2
E17.5_EYFP_CCCTCACCAAACGGGC-1	E17.5_EYFP	19962	4994	NA	NA	7.35397	-0.277409	-0.254194	G1	E17.5_EYFP	18445	4981	NA	3	3	10x_3	10x	NA	31140	20344	9364	3128	6813	2490	901	574	0.836078	0.85	4.66015	0.18	0.434986	0.565014	3	3	3
E17.5_EYFP_CCCTCATAGTGAGCAA-1	E17.5_EYFP	11186	2822	NA	NA	12.2743	-0.0504288	-0.132104	G1	E17.5_EYFP	16885	2817	NA	1	5	10x_5	10x	NA	29823	18830	1533	875	7362	2089	516	348	0.766209	0.69	6.14575	0.7	0.639714	0.360286	5	5	1
E17.5_EYFP_CCTGGTAAGTTCCTGC-1	E17.5_EYFP	23601	5353	NA	NA	6.13533	0.137159	-0.120884	S	E17.5_EYFP	18447	5326	NA	1	7	10x_7	10x	NA	20507	13911	13809	3895	5587	2090	977	560	0.774525	0.71	6.26408	0.74	0.563777	0.436223	7	7	1
E17.5_EYFP_CCTGTAACATCACTTC-1	E17.5_EYFP	10627	3157	NA	NA	5.48603	-0.0994703	-0.200298	G1	E17.5_EYFP	17033	3146	NA	2	3	10x_3	10x	NA	9574	8157	1755	998	7378	2368	582	391	0.734156	0.58	5.59357	0.51	0.5	0.5	3	3	2
E17.5_EYFP_CCTTAGTGTGGACATC-1	E17.5_EYFP	19937	5166	NA	NA	4.14807	-0.227953	0.593351	G2M	E17.5_EYFP	18455	5121	NA	6	6_0	10x_6_0	10x	NA	3546	3224	12563	3763	3986	1991	943	496	0.660643	0.34	5.28241	0.38	0.504846	0.495154	6	6_0	6
E17.5_EYFP_CCTTATGTCCTTCTAG-1	E17.5_EYFP	6124	2514	NA	NA	2.20444	-0.198003	-0.184189	G1	E17.5_EYFP	16002	3216	NA	2	3	10x_3	10x	NA	27052	18550	1202	767	4208	1810	337	259	0.650688	0.29	3.9856	0.05	0.893691	0.106309	3	3	2
E17.5_EYFP_CCTTCAATCGGGCCAT-1	E17.5_EYFP	25684	4869	NA	NA	3.66765	0.00362557	-0.235393	S	E17.5_EYFP	18270	4800	NA	1	5	10x_5	10x	NA	34819	21881	5134	2141	17203	3416	1393	785	0.748548	0.65	4.91249	0.26	0.441021	0.558979	5	5	1
E17.5_EYFP_CCTTCGTAGTCACTCC-1	E17.5_EYFP	26329	5706	NA	NA	4.23867	0.0048213	0.242489	G2M	E17.5_EYFP	18175	5621	NA	3	0	10x_0	10x	NA	37410	23877	16697	4161	4883	2203	1101	561	0.606222	0.19	4.74372	0.21	0.641634	0.358366	0	0	3
E17.5_EYFP_CGAACCGGTTTGACCT-1	E17.5_EYFP	5969	2328	NA	NA	6.55051	-0.0771846	-0.176892	G1	E17.5_EYFP	16713	3190	NA	3	3	10x_3	10x	NA	9198	7768	4025	1734	751	493	249	179	0.766756	0.7	5.31136	0.39	0.753803	0.246197	3	3	3
E17.5_EYFP_CGACTAAGTAACCACA-1	E17.5_EYFP	8828	2875	NA	NA	9.67377	-0.168121	-0.231288	G1	E17.5_EYFP	16651	3002	NA	2	0	10x_0	10x	NA	23200	16350	1593	862	5607	2101	472	358	0.705923	0.5	5.62882	0.52	0.5	0.5	0	0	2
E17.5_EYFP_CGCACACAGTGACCTG-1	E17.5_EYFP	23772	5412	NA	NA	4.00892	0.365355	-0.20396	S	E17.5_EYFP	18436	5376	NA	3	0	10x_0	10x	NA	48917	28516	13607	3843	6329	2237	1055	582	0.666989	0.36	4.45253	0.13	0.564333	0.435667	0	0	3
E17.5_EYFP_CGCACCACATCGCTTT-1	E17.5_EYFP	16307	4077	NA	NA	6.12007	-0.217322	-0.115872	G1	E17.5_EYFP	17092	4068	NA	1	7	10x_7	10x	NA	30107	20079	9459	2797	4056	1614	612	396	0.672749	0.38	5.55928	0.49	0.544123	0.455877	7	7	1
E17.5_EYFP_CGGACAACACTTACAG-1	E17.5_EYFP	12163	3565	NA	NA	6.30601	-0.203805	-0.176738	G1	E17.5_EYFP	17079	3555	NA	1	7	10x_7	10x	NA	28447	18282	6958	2370	2949	1350	506	307	0.783439	0.74	5.74646	0.56	0.5	0.5	7	7	1
E17.5_EYFP_CTAACCCTCCTAAGTA-1	E17.5_EYFP	15630	3818	NA	NA	7.37684	-0.127391	-0.12007	G1	E17.5_EYFP	16992	3800	NA	3	0	10x_0	10x	NA	40117	24864	2427	1294	10720	2786	822	536	0.677541	0.4	5.00959	0.29	0.5	0.5	0	0	3
E17.5_EYFP_CTAATCCGTTCACCCA-1	E17.5_EYFP	25742	5996	NA	NA	5.70274	0.175317	-0.200328	S	E17.5_EYFP	18205	5958	NA	4	2	10x_2	10x	NA	62420	33260	14352	4109	6894	2732	1119	629	0.677206	0.39	5.34363	0.4	0.487123	0.512877	2	2	4
E17.5_EYFP_CTACGAAGTTGGATCA-1	E17.5_EYFP	16172	4169	NA	NA	5.48479	-0.154984	-0.101395	G1	E17.5_EYFP	17063	4154	NA	4	2	10x_2	10x	NA	31856	21562	9552	2950	3626	1619	673	382	0.872166	0.91	4.78083	0.22	0.560435	0.439565	2	2	4
E17.5_EYFP_CTACTTAGTAGCCATA-1	E17.5_EYFP	21366	5395	NA	NA	3.08902	-0.180175	-0.221226	G1	E17.5_EYFP	18473	5364	NA	3	0	10x_0	10x	NA	31284	20955	12553	3738	5430	2211	883	513	0.791946	0.76	5.58018	0.5	0.50569	0.49431	0	0	3
E17.5_EYFP_CTCCTCACATAATCAC-1	E17.5_EYFP	16972	4058	NA	NA	3.29955	-0.262503	-0.188316	G1	E17.5_EYFP	17229	4035	NA	2	3	10x_3	10x	NA	14689	11594	2252	1247	12687	3211	912	594	0.784803	0.75	5.88042	0.61	0.533273	0.466727	3	3	2
E17.5_EYFP_CTGGTCAAGGATCACT-1	E17.5_EYFP	28879	5750	NA	NA	6.03899	0.0509051	-0.169839	S	E17.5_EYFP	18317	5482	NA	1	7	10x_7	10x	NA	40325	24805	17339	4196	6507	2401	1135	627	0.909054	0.94	4.95549	0.27	0.647838	0.352162	7	7	1
E17.5_EYFP_CTGTTAAAGCTGAGGG-1	E17.5_EYFP	8660	3017	NA	NA	6.9515	-0.10967	-0.176943	G1	E17.5_EYFP	16632	3163	NA	2	3	10x_3	10x	NA	37775	23596	1411	907	5889	2211	494	374	0.797875	0.78	6.05782	0.67	0.601887	0.398113	3	3	2
E17.5_EYFP_CTGTTCATCAAAGGCA-1	E17.5_EYFP	22525	5276	NA	NA	7.62264	-0.232213	-0.247475	G1	E17.5_EYFP	18456	5239	NA	1	9	10x_9	10x	NA	29259	18508	14147	3980	3845	1730	910	519	1.10344	0.99	4.63428	0.17	0.492202	0.507798	9	9	1
E17.5_EYFP_CTTCAATTCTCGACCT-1	E17.5_EYFP	36708	6937	NA	NA	6.67429	-0.149711	-0.201063	G1	E17.5_EYFP	17729	5257	NA	4	2	10x_2	10x	NA	71623	38246	17490	4741	12834	3697	1688	866	0.830882	0.84	4.79113	0.22	0.467163	0.532837	2	2	4
E17.5_EYFP_CTTCATCCAACACCTA-1	E17.5_EYFP	6737	2519	NA	NA	12.1864	-0.0725047	0.749745	G2M	E17.5_EYFP	16108	3066	NA	2	3	10x_3	10x	NA	25291	17153	1641	899	3630	1706	367	263	0.591791	0.15	6.97978	0.89	0.5	0.5	3	3	2
E17.5_EYFP_CTTGCAACACAAGCCT-1	E17.5_EYFP	13937	4129	NA	NA	2.84853	-0.0895955	-0.181674	G1	E17.5_EYFP	16942	4111	NA	4	2	10x_2	10x	NA	31019	19686	8417	2909	3419	1598	665	420	0.876701	0.91	5.52962	0.48	0.624442	0.375558	2	2	4
E17.5_EYFP_CTTTAGTTCCCATAAA-1	E17.5_EYFP	13564	3568	NA	NA	2.21174	-0.204823	-0.193227	G1	E17.5_EYFP	16931	3558	NA	2	3	10x_3	10x	NA	27819	18305	2422	1316	9621	2610	689	476	0.767286	0.7	6.39185	0.78	0.5	0.5	3	3	2
E17.5_EYFP_GAACCAAAGCATTTCT-1	E17.5_EYFP	12011	3543	NA	NA	5.0204	-0.18601	-0.149209	G1	E17.5_EYFP	16781	3530	NA	2	3	10x_3	10x	NA	21152	15273	1878	1110	8358	2637	671	471	0.5343	0.06	5.50769	0.47	0.535754	0.464246	3	3	2
E17.5_EYFP_GAACCTTAGAGCAAGC-1	E17.5_EYFP	14399	4178	NA	NA	5.46566	-0.216101	-0.251691	G1	E17.5_EYFP	16991	4154	NA	3	0	10x_0	10x	NA	10385	8687	8941	2986	2787	1453	596	367	0.783975	0.74	6.7341	0.85	0.670955	0.329045	0	0	3
E17.5_EYFP_GAACCTTAGGACCTCA-1	E17.5_EYFP	23148	4685	NA	NA	5.33955	-0.182579	-0.215782	G1	E17.5_EYFP	18432	4665	NA	4	2	10x_2	10x	NA	15565	12165	2853	1584	17037	3610	1288	800	0.623973	0.22	4.86046	0.24	0.602134	0.397866	2	2	4
E17.5_EYFP_GAAGCTAAGAGGAGGA-1	E17.5_EYFP	15790	3839	NA	NA	8.13806	-0.146178	-0.135172	G1	E17.5_EYFP	17067	3829	NA	1	7	10x_7	10x	NA	36836	22482	9929	2717	2718	1315	562	347	0.918755	0.94	5.29216	0.38	0.684134	0.315866	7	7	1
E17.5_EYFP_GACAATACAGGCGAGT-1	E17.5_EYFP	30727	6349	NA	NA	4.20477	0.772342	0.446585	S	E17.5_EYFP	18273	5843	NA	4	2	10x_2	10x	NA	43409	26967	19114	4674	5960	2451	1284	651	0.811717	0.8	4.05325	0.06	0.512279	0.487721	2	2	4
E17.5_EYFP_GAGAACCAGTACTGGT-1	E17.5_EYFP	35305	6607	NA	NA	3.67937	0.153788	-0.307913	S	E17.5_EYFP	17904	5251	NA	4	2	10x_2	10x	NA	18802	14566	18129	4652	11668	3484	1774	895	1.14626	1	4.61295	0.17	0.675797	0.324203	2	2	4
E17.5_EYFP_GAGCAAGGTACGGTAC-1	E17.5_EYFP	12326	3552	NA	NA	12.859	0.156609	0.702816	G2M	E17.5_EYFP	16795	3530	NA	1	5	10x_5	10x	NA	11953	9645	2339	1352	7206	2404	707	501	0.716473	0.53	7.12178	0.91	0.670279	0.329721	5	5	1
E17.5_EYFP_GAGGCCTTCGTTACTT-1	E17.5_EYFP	5911	2221	NA	NA	8.86483	-0.102277	-0.152778	G1	E17.5_EYFP	16155	3038	NA	2	3	10x_3	10x	NA	23012	15738	1089	724	3824	1539	266	210	0.650262	0.29	6.93319	0.88	0.5	0.5	3	3	2
E17.5_EYFP_GAGTAATAGTACCGCA-1	E17.5_EYFP	24200	5394	NA	NA	6.40083	-0.236207	-0.111537	G1	E17.5_EYFP	18324	5358	NA	4	2	10x_2	10x	NA	40351	25257	13228	3766	6725	2387	1080	589	0.830799	0.84	4.41225	0.12	0.506927	0.493073	2	2	4
E17.5_EYFP_GATGAGGGTTTCCTCC-1	E17.5_EYFP	11501	3487	NA	NA	4.86914	-0.182378	-0.223416	G1	E17.5_EYFP	16752	3476	NA	3	0	10x_0	10x	NA	28310	18062	1705	960	8289	2683	587	429	0.734158	0.59	6.25842	0.74	0.484399	0.515601	0	0	3
E17.5_EYFP_GATGCATTCCGTAAAC-1	E17.5_EYFP	32291	5438	NA	NA	4.0135	-0.265348	-0.208002	G1	E17.5_EYFP	18370	4835	NA	4	2	10x_2	10x	NA	28652	19308	3655	1948	24447	4305	1764	1007	0.686413	0.43	4.93167	0.26	0.636224	0.363776	2	2	4
E17.5_EYFP_GATTACGGTTAGTTGG-1	E17.5_EYFP	25328	5576	NA	NA	4.25616	-0.153958	-0.285788	G1	E17.5_EYFP	17993	5546	NA	3	0	10x_0	10x	NA	29049	21483	14898	3900	6156	2403	1059	593	0.779485	0.73	5.09585	0.32	0.673876	0.326124	0	0	3
E17.5_EYFP_GATTACTCAGGTTACC-1	E17.5_EYFP	12913	3688	NA	NA	6.28824	-0.135333	-0.16979	G1	E17.5_EYFP	16958	3661	NA	1	6_0	10x_6_0	10x	NA	3181	2860	4197	1769	6533	2165	564	406	0.531469	0.06	6.13707	0.7	0.43805	0.56195	6	6_0	1
E17.5_EYFP_GCAAACAAGTAACCAC-1	E17.5_EYFP	26062	4544	NA	NA	3.71038	-0.177689	-0.233733	G1	E17.5_EYFP	18339	4460	NA	3	0	10x_0	10x	NA	36313	23182	3506	1504	19144	3491	1461	776	0.73904	0.6	5.55565	0.48	0.546443	0.453557	0	0	3
E17.5_EYFP_GCACATTAGCACAGAA-1	E17.5_EYFP	33537	6449	NA	NA	5.96356	0.405919	-0.228572	S	E17.5_EYFP	18353	5507	NA	4	2	10x_2	10x	NA	18671	14300	9738	3745	18401	4086	1755	990	0.761613	0.68	5.29038	0.38	0.597097	0.402903	2	2	4
E17.5_EYFP_GCAGCCAGTAGTTAAC-1	E17.5_EYFP	25968	5772	NA	NA	4.43623	-0.227532	-0.250236	G1	E17.5_EYFP	18107	5730	NA	4	2	10x_2	10x	NA	9161	7835	15530	4041	5938	2531	1076	588	0.684438	0.42	4.40033	0.11	0.603877	0.396123	2	2	4
E17.5_EYFP_GCAGCTATCACCGGTA-1	E17.5_EYFP	17662	4806	NA	NA	3.98596	-0.28289	-0.302291	G1	E17.5_EYFP	17651	4794	NA	4	2	10x_2	10x	NA	17850	13309	8209	2930	6946	2462	895	534	0.934847	0.96	5.07781	0.31	0.5	0.5	2	2	4
E17.5_EYFP_GCCACAATCAATCATG-1	E17.5_EYFP	14750	4038	NA	NA	4.44746	-0.165985	-0.179368	G1	E17.5_EYFP	16963	4008	NA	6	6_0	10x_6_0	10x	NA	31321	20666	8091	2545	4357	1843	717	404	0.745618	0.64	4.89144	0.25	0.5	0.5	6	6_0	6
E17.5_EYFP_GCCGTGAGTAACTACG-1	E17.5_EYFP	11491	3665	NA	NA	6.65738	-0.183579	-0.214565	G1	E17.5_EYFP	16787	3639	NA	7	8_0	10x_8_0	10x	NA	24305	15201	6228	2418	3114	1517	495	335	0.929211	0.95	5.32424	0.39	0.480658	0.519342	8	8_0	7
E17.5_EYFP_GCCTCAAAGTTTGTCT-1	E17.5_EYFP	7321	2637	NA	NA	3.87925	-0.11586	-0.180682	G1	E17.5_EYFP	16378	3045	NA	2	3	10x_3	10x	NA	13125	9815	1504	817	4828	1914	414	292	0.592526	0.15	8.97547	0.99	0.502992	0.497008	3	3	2
E17.5_EYFP_GCCTTGCGTCCACAAA-1	E17.5_EYFP	15810	4209	NA	NA	5.5661	-0.184608	-0.226592	G1	E17.5_EYFP	16954	4197	NA	4	2	10x_2	10x	NA	5241	4667	3656	1910	9860	2801	834	544	0.620066	0.22	5.67788	0.55	0.5	0.5	2	2	4
E17.5_EYFP_GCGAGTGAGCTCCTTA-1	E17.5_EYFP	22284	4874	NA	NA	6.29151	-0.0025902	-0.16982	G1	E17.5_EYFP	18343	4862	NA	1	7	10x_7	10x	NA	13995	10549	14316	3619	3738	1633	939	494	0.755843	0.66	6.14825	0.7	0.686608	0.313392	7	7	1
E17.5_EYFP_GCGATATTCCACCTGT-1	E17.5_EYFP	9169	3183	NA	NA	5.45316	-0.1817	-0.114545	G1	E17.5_EYFP	17091	3239	NA	4	9	10x_9	10x	NA	35088	21723	5042	2017	2511	1301	420	288	0.87345	0.91	5.26946	0.37	0.493802	0.506198	9	9	4
E17.5_EYFP_GCGCCTTGTTCAAGCA-1	E17.5_EYFP	9356	3412	NA	NA	5.08764	-0.218083	-0.24065	G1	E17.5_EYFP	16787	3431	NA	7	8_0	10x_8_0	10x	NA	27710	16769	4581	2055	3133	1471	489	300	0.72784	0.56	4.53532	0.15	0.50147	0.49853	8	8_0	7
E17.5_EYFP_GCGCTTAAGGAAGCTA-1	E17.5_EYFP	25345	5457	NA	NA	8.73151	0.424548	-0.137004	S	E17.5_EYFP	18113	5434	NA	1	7	10x_7	10x	NA	35078	21671	15858	4136	4191	1880	1004	546	0.745582	0.64	5.62232	0.52	0.521894	0.478106	7	7	1
E17.5_EYFP_GCGTTTCTCAGCACCA-1	E17.5_EYFP	20210	5070	NA	NA	9.98516	0.927759	0.621104	S	E17.5_EYFP	18475	5040	NA	1	7	10x_7	10x	NA	6372	5574	11242	3557	4774	2109	868	501	0.737201	0.6	4.63683	0.17	0.544469	0.455531	7	7	1
E17.5_EYFP_GCTAAGCGTTAACGAT-1	E17.5_EYFP	27413	5404	NA	NA	7.08423	-0.175266	-0.312946	G1	E17.5_EYFP	18409	5216	NA	1	5	10x_5	10x	NA	37617	24194	4059	1996	19190	4143	1345	846	0.903614	0.94	6.39924	0.78	0.637974	0.362026	5	5	1
E17.5_EYFP_GCTATTGCATATAACC-1	E17.5_EYFP	32511	6503	NA	NA	6.0964	-0.245926	-0.368082	G1	E17.5_EYFP	18402	5809	NA	2	3	10x_3	10x	NA	84784	41122	13004	4118	14124	3733	1671	928	0.696534	0.46	5.17767	0.34	0.5	0.5	3	3	2
E17.5_EYFP_GCTGACCAGCTGCACA-1	E17.5_EYFP	37420	6800	NA	NA	5.25655	0.957321	0.604426	S	E17.5_EYFP	17383	4882	NA	1	7	10x_7	10x	NA	24173	17398	21002	5009	9744	2958	1496	762	0.665104	0.35	4.20479	0.08	0.541155	0.458845	7	7	1
E17.5_EYFP_GGAACCTGTTTGAGCA-1	E17.5_EYFP	21952	5065	NA	NA	4.19552	-0.0206844	-0.104474	G1	E17.5_EYFP	18423	5025	NA	4	2	10x_2	10x	NA	35890	22581	5537	2417	13193	3401	1430	794	0.633859	0.24	4.92366	0.26	0.684316	0.315684	2	2	4
E17.5_EYFP_GGAAGTATCTATTGTC-1	E17.5_EYFP	13015	3647	NA	NA	4.65617	0.192358	-0.121989	S	E17.5_EYFP	16880	3631	NA	2	3	10x_3	10x	NA	38274	23825	1972	1106	9328	2751	708	476	0.715363	0.52	5.65028	0.53	0.5	0.5	3	3	2
E17.5_EYFP_GGACAGCCATCTAGCA-1	E17.5_EYFP	8340	2752	NA	NA	6.17506	-0.168545	-0.172514	G1	E17.5_EYFP	16612	2984	NA	2	3	10x_3	10x	NA	36009	22000	1356	823	5794	2050	429	319	0.745357	0.63	6.55278	0.82	0.5	0.5	3	3	2
E17.5_EYFP_GGAGGTTAGGATTTGC-1	E17.5_EYFP	19941	4529	NA	NA	5.46111	-0.196844	1.209	G2M	E17.5_EYFP	18370	4513	NA	2	3	10x_3	10x	NA	16375	12354	3107	1630	13879	3432	1231	764	0.673531	0.38	6.42797	0.79	0.565363	0.434637	3	3	2
E17.5_EYFP_GGATGAATCTGGCATG-1	E17.5_EYFP	29169	5751	NA	NA	5.24872	-0.167173	-0.203784	G1	E17.5_EYFP	18303	5447	NA	1	7	10x_7	10x	NA	11843	9658	18279	4247	5656	2237	1209	626	0.862898	0.9	5.01067	0.29	0.605251	0.394749	7	7	1
E17.5_EYFP_GGATTCAGTTGTAAAC-1	E17.5_EYFP	14616	3839	NA	NA	6.41078	-0.10403	-0.200165	G1	E17.5_EYFP	16878	3821	NA	2	3	10x_3	10x	NA	29149	19804	2039	1216	10356	2923	847	563	0.79559	0.77	5.62207	0.52	0.538551	0.461449	3	3	2
E17.5_EYFP_GGCAAGCCAATATAGG-1	E17.5_EYFP	15686	3721	NA	NA	6.24761	0.00110113	-0.144636	S	E17.5_EYFP	17025	3706	NA	2	0	10x_0	10x	NA	14040	11509	2292	1308	11038	2794	880	575	0.69646	0.46	5.90508	0.62	0.539115	0.460885	0	0	2
E17.5_EYFP_GGCTATGTCTCACTAT-1	E17.5_EYFP	16906	4255	NA	NA	3.37158	-0.215815	-0.192323	G1	E17.5_EYFP	17193	4231	NA	0	1	10x_1	10x	NA	19497	13415	4874	2191	9852	2614	853	583	0.71451	0.52	5.58898	0.5	0.461303	0.538697	1	1	0
E17.5_EYFP_GGCTCAATCATTTGCT-1	E17.5_EYFP	17679	5020	NA	NA	2.74902	-0.0421516	-0.267017	G1	E17.5_EYFP	17654	4995	NA	3	3	10x_3	10x	NA	9451	8058	8869	3200	6363	2378	867	514	0.665649	0.35	5.22548	0.35	0.59446	0.40554	3	3	3
E17.5_EYFP_GGGCATGAGTCATGCG-1	E17.5_EYFP	11463	3106	NA	NA	4.06525	-0.0566504	-0.237648	G1	E17.5_EYFP	16826	3096	NA	2	3	10x_3	10x	NA	26279	17638	1611	911	8383	2360	637	434	0.781474	0.73	6.36962	0.77	0.5	0.5	3	3	2
E17.5_EYFP_GGGCGAATCGCGACAC-1	E17.5_EYFP	35070	6494	NA	NA	10.3621	-0.172379	-0.220667	G1	E17.5_EYFP	17720	4952	NA	1	7	10x_7	10x	NA	82479	38696	16270	4145	11223	3540	1453	813	0.674862	0.39	6.36113	0.77	0.5	0.5	7	7	1
E17.5_EYFP_GGGTTACGTCATAGAT-1	E17.5_EYFP	17188	4483	NA	NA	6.14382	-0.201686	-0.263178	G1	E17.5_EYFP	17302	4460	NA	3	0	10x_0	10x	NA	33612	21855	3172	1828	11302	3131	940	652	0.652751	0.3	4.99395	0.28	0.51286	0.48714	0	0	3
E17.5_EYFP_GGTCAAGCATTTGCTC-1	E17.5_EYFP	8504	3026	NA	NA	12.8881	0.343022	0.367461	G2M	E17.5_EYFP	16571	3203	NA	4	2	10x_2	10x	NA	12471	9900	1949	1078	4717	2128	451	326	0.68606	0.43	6.35606	0.76	0.513365	0.486635	2	2	4
E17.5_EYFP_GGTCCATCACTAAGTT-1	E17.5_EYFP	24864	5824	NA	NA	4.94691	0.514716	0.641098	G2M	E17.5_EYFP	18141	5779	NA	3	3	10x_3	10x	NA	27868	18880	13495	4102	6833	2501	1175	631	0.595902	0.15	4.42832	0.12	0.545179	0.454821	3	3	3
E17.5_EYFP_GGTCGGTTCGGGACCT-1	E17.5_EYFP	16097	4620	NA	NA	7.06343	-0.115661	-0.22369	G1	E17.5_EYFP	16952	4597	NA	3	0	10x_0	10x	NA	31677	20586	9951	3400	2978	1519	682	432	0.815448	0.81	5.80667	0.58	0.540668	0.459332	0	0	3
E17.5_EYFP_GGTGCTTCACTAAGAA-1	E17.5_EYFP	17798	4315	NA	NA	5.47253	-0.181332	-0.240522	G1	E17.5_EYFP	17756	4290	NA	2	3	10x_3	10x	NA	39208	25244	2956	1637	12155	3143	1060	650	0.878261	0.92	5.55862	0.49	0.514067	0.485933	3	3	2
E17.5_EYFP_GGTGTCCAGCAAGGTA-1	E17.5_EYFP	14710	4640	NA	NA	3.28348	-0.162663	-0.283633	G1	E17.5_EYFP	16782	4599	NA	6	6_0	10x_6_0	10x	NA	42280	25728	6737	2836	5805	2276	760	471	0.747717	0.64	4.83559	0.23	0.5	0.5	6	6_0	6
E17.5_EYFP_GGTTAATGTTATCGAG-1	E17.5_EYFP	18406	4835	NA	NA	13.1642	-0.260796	-0.272555	G1	E17.5_EYFP	18099	4806	NA	4	2	10x_2	10x	NA	57079	30812	7303	2913	6871	2517	903	541	0.740361	0.61	5.58519	0.5	0.5	0.5	2	2	4
E17.5_EYFP_GGTTTAATCGTTCACC-1	E17.5_EYFP	17854	4273	NA	NA	5.57298	-0.17442	-0.181248	G1	E17.5_EYFP	17791	4248	NA	1	7	10x_7	10x	NA	36882	21978	9555	2849	5404	1878	712	458	0.786504	0.75	5.62371	0.52	0.5	0.5	7	7	1
E17.5_EYFP_GTAAGCAAGCCAAATC-1	E17.5_EYFP	15275	4225	NA	NA	6.96563	-0.221672	-0.254083	G1	E17.5_EYFP	16921	4204	NA	2	3	10x_3	10x	NA	16205	13077	8096	2807	4451	1761	659	394	0.798592	0.78	4.23513	0.09	0.674864	0.325136	3	3	2
E17.5_EYFP_GTACACCCACAGAACG-1	E17.5_EYFP	10838	3538	NA	NA	6.39417	-0.129764	-0.239896	G1	E17.5_EYFP	17360	3527	NA	3	0	10x_0	10x	NA	29037	18949	6254	2323	2459	1317	471	307	0.938094	0.96	6.17601	0.71	0.503301	0.496699	0	0	3
E17.5_EYFP_GTAGCCATCCAGGTTG-1	E17.5_EYFP	25786	5243	NA	NA	8.75281	-0.258387	-0.221197	G1	E17.5_EYFP	18257	5180	NA	4	2	10x_2	10x	NA	15735	12635	4405	2115	16782	3943	1542	867	0.556775	0.09	5.13526	0.33	0.729118	0.270882	2	2	4
E17.5_EYFP_GTATTGCAGTCCTTCA-1	E17.5_EYFP	14411	3679	NA	NA	5.64152	-0.0972427	-0.202364	G1	E17.5_EYFP	16980	3660	NA	2	3	10x_3	10x	NA	34339	22504	2127	1211	10254	2797	777	520	0.717444	0.53	5.51515	0.47	0.5	0.5	3	3	2
E17.5_EYFP_GTATTGCAGTGAACAG-1	E17.5_EYFP	6159	2571	NA	NA	13.2814	-0.0741836	-0.195142	G1	E17.5_EYFP	16293	3233	NA	3	0	10x_0	10x	NA	29406	17683	2638	1423	2100	1172	288	209	0.677323	0.39	6.52551	0.81	0.435863	0.564137	0	0	3
E17.5_EYFP_GTCGAAGCATAGACCC-1	E17.5_EYFP	10298	2967	NA	NA	9.06001	-0.188782	-0.183917	G1	E17.5_EYFP	17193	2962	NA	1	5	10x_5	10x	NA	24628	15619	2072	1126	6409	2010	495	362	0.75042	0.65	6.96475	0.88	0.559282	0.440718	5	5	1
E17.5_EYFP_GTCGAGGAGTGAGCGG-1	E17.5_EYFP	24654	6164	NA	NA	7.06985	0.344767	-0.0580706	S	E17.5_EYFP	18284	6128	NA	4	2	10x_2	10x	NA	52195	30312	10162	3677	10088	3437	1336	819	0.696009	0.46	5.61366	0.51	0.5	0.5	2	2	4
E17.5_EYFP_GTCGCAATCCCGTTAC-1	E17.5_EYFP	19037	4803	NA	NA	7.58523	-0.13952	-0.191766	G1	E17.5_EYFP	18291	4782	NA	1	7	10x_7	10x	NA	26750	17622	11318	3394	4135	1851	773	461	0.925824	0.95	4.88992	0.25	0.555201	0.444799	7	7	1
E17.5_EYFP_GTGAATCTCGTGCTAG-1	E17.5_EYFP	5434	2141	NA	NA	7.12183	-0.0931135	-0.133905	G1	E17.5_EYFP	16069	3206	NA	2	3	10x_3	10x	NA	9985	8021	947	576	3632	1564	307	241	0.658283	0.33	8.12779	0.97	0.5	0.5	3	3	2
E17.5_EYFP_GTGATCAGTGTAACCA-1	E17.5_EYFP	20432	5022	NA	NA	9.23062	-0.113235	-0.189104	G1	E17.5_EYFP	18425	4997	NA	3	3	10x_3	10x	NA	73508	37596	10542	3335	5595	2186	816	489	0.764075	0.69	5.35487	0.41	0.562878	0.437122	3	3	3
E17.5_EYFP_GTGGACACAGCATGTC-1	E17.5_EYFP	28408	5597	NA	NA	4.97747	0.210903	-0.184012	S	E17.5_EYFP	18263	5356	NA	1	7	10x_7	10x	NA	43587	25714	17997	4081	5830	2240	1051	584	0.738548	0.6	5.34177	0.4	0.603629	0.396371	7	7	1
E17.5_EYFP_GTGGCTTCACATTGCA-1	E17.5_EYFP	17287	4739	NA	NA	5.86568	-0.218487	-0.295363	G1	E17.5_EYFP	17395	4713	NA	3	0	10x_0	10x	NA	40404	25256	9615	3206	4642	1957	833	459	0.748774	0.65	5.65103	0.53	0.568788	0.431212	0	0	3
E17.5_EYFP_GTGTAACTCAGGATGA-1	E17.5_EYFP	8516	3386	NA	NA	4.39173	-0.251458	-0.228929	G1	E17.5_EYFP	16809	3488	NA	4	2	10x_2	10x	NA	31303	20557	4697	2146	2425	1319	428	298	0.92166	0.95	5.28965	0.38	0.5	0.5	2	2	4
E17.5_EYFP_GTTGGAGCAGGCTGTT-1	E17.5_EYFP	28340	5845	NA	NA	4.75653	0.649212	0.168378	S	E17.5_EYFP	18253	5596	NA	1	7	10x_7	10x	NA	34383	21152	19062	4493	4108	1884	1164	592	0.74553	0.64	4.66912	0.18	0.531426	0.468574	7	7	1
E17.5_EYFP_TAAAGCCTCCAGGGAG-1	E17.5_EYFP	15987	4355	NA	NA	5.83599	-0.192297	-0.2434	G1	E17.5_EYFP	16979	4328	NA	6	6_0	10x_6_0	10x	NA	34740	22014	9316	2904	4062	1832	726	410	0.89326	0.93	4.76948	0.21	0.5	0.5	6	6_0	6
E17.5_EYFP_TAAGGCTTCGCTTGCT-1	E17.5_EYFP	19833	4949	NA	NA	8.56653	0.0558994	0.734692	G2M	E17.5_EYFP	18359	4896	NA	7	8_0	10x_8_0	10x	NA	25110	16070	11727	3545	3726	1859	822	464	0.798456	0.78	4.56839	0.16	0.510647	0.489353	8	8_0	7
E17.5_EYFP_TACCGCAAGCTGTCAG-1	E17.5_EYFP	5693	2290	NA	NA	6.86808	-0.0671572	-0.14818	G1	E17.5_EYFP	16637	3224	NA	4	9	10x_9	10x	NA	16481	11695	2752	1243	1861	1061	279	196	0.538129	0.07	6.71423	0.84	0.498288	0.501712	9	9	4
E17.5_EYFP_TACGGATTCACAGACT-1	E17.5_EYFP	17712	4618	NA	NA	5.99029	-0.211743	-0.215955	G1	E17.5_EYFP	17687	4594	NA	5	6_0	10x_6_0	10x	NA	39576	23337	8965	3095	5698	1968	827	471	0.728944	0.57	4.3605	0.11	0.5	0.5	6	6_0	5
E17.5_EYFP_TACGTAATCATGGCCA-1	E17.5_EYFP	34999	6534	NA	NA	5.93731	-0.0835175	1.51656	G2M	E17.5_EYFP	17929	5196	NA	3	0	10x_0	10x	NA	10258	8716	20968	4880	7615	2749	1405	737	0.665674	0.35	5.89162	0.61	0.497317	0.502683	0	0	3
E17.5_EYFP_TACTTCGTCACAGGAA-1	E17.5_EYFP	16515	4695	NA	NA	5.13473	-0.210244	-0.208801	G1	E17.5_EYFP	17034	4669	NA	2	3	10x_3	10x	NA	37304	22780	8745	3057	5001	2051	716	439	0.786644	0.75	5.5275	0.47	0.511579	0.488421	3	3	2
E17.5_EYFP_TAGCCTCTCCTTCGTA-1	E17.5_EYFP	9060	2885	NA	NA	8.234	-0.0481495	-0.174363	G1	E17.5_EYFP	16689	2970	NA	2	3	10x_3	10x	NA	12922	9888	1711	914	5856	2098	434	311	0.548695	0.08	6.25814	0.74	0.5	0.5	3	3	2
E17.5_EYFP_TAGCCTCTCGGTTTCC-1	E17.5_EYFP	25505	5242	NA	NA	5.78318	0.0184437	-0.146972	S	E17.5_EYFP	18043	5214	NA	1	7	10x_7	10x	NA	25724	16698	15202	3936	5880	2029	1013	543	0.818325	0.82	5.12103	0.32	0.556742	0.443258	7	7	1
E17.5_EYFP_TAGGTGCGTCGTTACT-1	E17.5_EYFP	12708	3857	NA	NA	5.55556	-0.186401	-0.064152	G1	E17.5_EYFP	16983	3843	NA	4	2	10x_2	10x	NA	25095	17610	7987	2713	2449	1265	602	338	0.864718	0.9	5.43591	0.45	0.594077	0.405923	2	2	4
E17.5_EYFP_TATGCATCATTGTCCT-1	E17.5_EYFP	31872	6289	NA	NA	6.08998	-0.270134	-0.193144	G1	E17.5_EYFP	18286	5587	NA	1	7	10x_7	10x	NA	41167	23883	17063	4433	9592	2897	1299	702	0.651773	0.3	5.57077	0.5	0.5	0.5	7	7	1
E17.5_EYFP_TATGGGCGTGCTGTAA-1	E17.5_EYFP	18288	4728	NA	NA	9.44882	0.546136	0.0686171	S	E17.5_EYFP	17962	4689	NA	7	8_0	10x_8_0	10x	NA	38615	22810	10624	3284	3391	1712	737	426	0.843455	0.86	4.64164	0.18	0.469186	0.530814	8	8_0	7
E17.5_EYFP_TCACATAAGACAAAGT-1	E17.5_EYFP	11947	3331	NA	NA	4.83803	-0.170292	-0.157538	G1	E17.5_EYFP	16783	3319	NA	2	3	10x_3	10x	NA	7174	6260	1815	1037	8543	2510	655	444	0.746929	0.64	6.78655	0.86	0.5	0.5	3	3	2
E17.5_EYFP_TCACCTGGTTGCACAA-1	E17.5_EYFP	27504	5995	NA	NA	3.81035	-0.116612	0.240247	G2M	E17.5_EYFP	18309	5862	NA	6	6_0	10x_6_0	10x	NA	36328	23402	15609	4260	7538	2602	1349	676	0.792788	0.77	4.49823	0.14	0.5	0.5	6	6_0	6
E17.5_EYFP_TCAGGTTAGGGCTTAT-1	E17.5_EYFP	24346	5394	NA	NA	5.36022	-0.139095	-0.316857	G1	E17.5_EYFP	18226	5361	NA	4	2	10x_2	10x	NA	33933	21968	14050	3822	5831	2272	982	540	0.795798	0.77	4.64397	0.18	0.502297	0.497703	2	2	4
E17.5_EYFP_TCAGTGAGTCCCGAAG-1	E17.5_EYFP	12412	3766	NA	NA	5.22881	-0.218228	-0.170274	G1	E17.5_EYFP	16865	3744	NA	0	1	10x_1	10x	NA	26816	17921	3980	1872	6606	2214	620	449	0.832654	0.85	5.67763	0.54	0.481437	0.518563	1	1	0
E17.5_EYFP_TCCATATTCCGGTTGA-1	E17.5_EYFP	7431	2587	NA	NA	3.04131	-0.157644	-0.127887	G1	E17.5_EYFP	16551	2953	NA	0	2	10x_2	10x	NA	23479	15892	1413	873	5139	1805	374	286	0.74398	0.63	6.51836	0.81	0.560383	0.439617	2	2	0
E17.5_EYFP_TCCTCACAGGAGCATA-1	E17.5_EYFP	10449	3629	NA	NA	4.37362	-0.137462	-0.178883	G1	E17.5_EYFP	17290	3611	NA	2	3	10x_3	10x	NA	38707	23031	5774	2268	2891	1542	519	333	0.663391	0.34	5.27231	0.37	0.621937	0.378063	3	3	2
E17.5_EYFP_TCCTGTTCACTGGCCA-1	E17.5_EYFP	23512	4581	NA	NA	4.41051	-0.162662	-0.177977	G1	E17.5_EYFP	18436	4560	NA	0	0	10x_0	10x	NA	33351	22431	3018	1581	17319	3526	1308	811	0.831667	0.84	5.74877	0.56	0.493819	0.506181	0	0	0
E17.5_EYFP_TCCTTGCAGCGGTTAT-1	E17.5_EYFP	18170	4198	NA	NA	9.47716	0.0160266	0.863085	G2M	E17.5_EYFP	17919	4183	NA	4	6_0	10x_6_0	10x	NA	9744	6645	12094	3370	1703	930	541	318	0.870337	0.91	7.74089	0.96	0.448288	0.551712	6	6_0	4
E17.5_EYFP_TCGGTTACACGAATCC-1	E17.5_EYFP	19536	4671	NA	NA	6.52129	0.408672	-0.0942689	S	E17.5_EYFP	18368	4644	NA	1	7	10x_7	10x	NA	29713	18532	12646	3439	3261	1567	733	422	0.925991	0.95	5.30718	0.39	0.529296	0.470704	7	7	1
E17.5_EYFP_TCGGTTCTCCCGTTGT-1	E17.5_EYFP	8682	2838	NA	NA	6.38102	-0.158509	-0.121691	G1	E17.5_EYFP	16704	3007	NA	2	3	10x_3	10x	NA	19289	14127	1620	903	5793	2058	420	298	0.6731	0.38	7.0406	0.9	0.501091	0.498909	3	3	2
E17.5_EYFP_TCGTTACGTAAAGCAA-1	E17.5_EYFP	29363	6190	NA	NA	5.28216	0.289555	0.973863	G2M	E17.5_EYFP	18433	5888	NA	3	0	10x_0	10x	NA	11174	9179	17747	4525	6186	2550	1296	641	0.54749	0.08	6.02018	0.65	0.640646	0.359354	0	0	3
E17.5_EYFP_TCTGGCTTCCGGCTAA-1	E17.5_EYFP	24871	5920	NA	NA	6.55382	-0.17327	-0.291207	G1	E17.5_EYFP	18278	5865	NA	3	0	10x_0	10x	NA	84656	41500	13140	4062	7354	2698	1066	650	0.711119	0.51	5.64523	0.53	0.537551	0.462449	0	0	3
E17.5_EYFP_TCTGGCTTCTAGCTAA-1	E17.5_EYFP	13419	3106	NA	NA	10.0678	0.0877395	-0.162716	S	E17.5_EYFP	17027	3096	NA	1	5	10x_5	10x	NA	25720	17469	2157	1025	8841	2275	666	454	0.721302	0.54	6.08703	0.68	0.688497	0.311503	5	5	1
E17.5_EYFP_TGAAGCAAGCGAAGTA-1	E17.5_EYFP	25617	5448	NA	NA	5.28555	0.135376	-0.199377	S	E17.5_EYFP	18078	5426	NA	4	2	10x_2	10x	NA	44500	27701	16832	4067	3790	1859	1007	521	0.847406	0.87	4.34328	0.1	0.537953	0.462047	2	2	4
E17.5_EYFP_TGAGCAAAGGGCCACT-1	E17.5_EYFP	27845	6189	NA	NA	7.49147	0.578272	-0.0107384	S	E17.5_EYFP	18346	6012	NA	3	0	10x_0	10x	NA	73952	38270	16635	4612	5514	2341	1249	667	0.840645	0.86	5.34608	0.41	0.49095	0.50905	0	0	3
E17.5_EYFP_TGAGGGAGTCGAAGTC-1	E17.5_EYFP	11818	3773	NA	NA	6.26163	-0.151878	-0.155688	G1	E17.5_EYFP	16879	3758	NA	2	3	10x_3	10x	NA	33121	21455	6518	2453	3126	1451	499	330	0.84985	0.88	5.895	0.61	0.569488	0.430512	3	3	2
E17.5_EYFP_TGATGATGTTACAAAC-1	E17.5_EYFP	16216	4511	NA	NA	3.03404	-0.220794	-0.21153	G1	E17.5_EYFP	16979	4477	NA	6	6_0	10x_6_0	10x	NA	26830	17345	10251	3195	3361	1631	737	438	0.729023	0.57	5.27929	0.37	0.492494	0.507506	6	6_0	6
E17.5_EYFP_TGCCTGTTCCTGGTGA-1	E17.5_EYFP	15949	3693	NA	NA	10.7342	0.28334	0.512395	G2M	E17.5_EYFP	17045	3673	NA	1	5	10x_5	10x	NA	42817	24233	2684	1251	10153	2784	850	534	0.82473	0.83	6.28301	0.75	0.683169	0.316831	5	5	1
E17.5_EYFP_TGCCTGTTCGCAACAT-1	E17.5_EYFP	20731	4536	NA	NA	7.46225	-0.255667	-0.229993	G1	E17.5_EYFP	18399	4523	NA	1	7	10x_7	10x	NA	24097	14464	12839	3261	3905	1693	774	443	0.60211	0.18	6.00309	0.65	0.478347	0.521653	7	7	1
E17.5_EYFP_TGCGCAGGTTTAACCC-1	E17.5_EYFP	14142	3885	NA	NA	8.83892	0.517755	0.106456	S	E17.5_EYFP	16856	3865	NA	3	0	10x_0	10x	NA	29349	19790	2232	1285	9373	2830	842	557	0.707391	0.5	6.14749	0.7	0.586286	0.413714	0	0	3
E17.5_EYFP_TGCTCACTCTCACATT-1	E17.5_EYFP	19783	5058	NA	NA	3.69509	-0.160517	-0.25536	G1	E17.5_EYFP	18399	5020	NA	2	3	10x_3	10x	NA	15775	12527	11031	3452	5691	2186	903	517	0.678112	0.4	5.4413	0.45	0.507261	0.492739	3	3	2
E17.5_EYFP_TGGACTAGTGCCGCAA-1	E17.5_EYFP	28206	5706	NA	NA	5.59455	-0.193106	-0.348833	G1	E17.5_EYFP	18323	5473	NA	6	6_0	10x_6_0	10x	NA	29882	19688	17357	4200	6140	2225	1239	601	0.716298	0.53	4.96213	0.27	0.487708	0.512292	6	6_0	6
E17.5_EYFP_TGGATTGGTTAACGAT-1	E17.5_EYFP	20203	4683	NA	NA	6.05851	-0.0785679	-0.150415	G1	E17.5_EYFP	18383	4667	NA	1	7	10x_7	10x	NA	31223	19492	12738	3363	3886	1668	751	405	0.754563	0.66	6.43008	0.79	0.719837	0.280163	7	7	1
E17.5_EYFP_TGGCTATAGCCGCAAC-1	E17.5_EYFP	36699	6907	NA	NA	6.98929	-0.279297	-0.278587	G1	E17.5_EYFP	17631	5144	NA	7	8_0	10x_8_0	10x	NA	94041	41967	20158	4790	9383	3367	1641	824	0.738605	0.6	5.33397	0.4	0.478607	0.521393	8	8_0	7
E17.5_EYFP_TGGCTTTGTCCTAATC-1	E17.5_EYFP	27515	5557	NA	NA	3.21643	-0.230385	-0.284656	G1	E17.5_EYFP	18257	5377	NA	6	6_0	10x_6_0	10x	NA	27144	17917	16151	3865	7498	2460	1219	619	0.801566	0.79	6.15893	0.7	0.5	0.5	6	6_0	6
E17.5_EYFP_TGTCATAAGAATCGCT-1	E17.5_EYFP	25645	5459	NA	NA	12.1271	-0.185614	-0.258256	G1	E17.5_EYFP	18111	5428	NA	4	2	10x_2	10x	NA	88860	40773	13406	3648	6044	2459	1036	582	0.798184	0.78	5.43399	0.45	0.521514	0.478486	2	2	4
E17.5_EYFP_TGTCATAAGCCACATG-1	E17.5_EYFP	26031	5329	NA	NA	11.2174	-0.144731	-0.133832	G1	E17.5_EYFP	18273	5260	NA	1	9	10x_9	10x	NA	23073	15443	15074	3933	4690	1940	1043	540	0.635769	0.25	4.19242	0.08	0.54964	0.45036	9	9	1
E17.5_EYFP_TGTTCCTCAAGCCAGA-1	E17.5_EYFP	17530	4504	NA	NA	5.64746	-0.158827	-0.205715	G1	E17.5_EYFP	17537	4486	NA	2	0	10x_0	10x	NA	29331	19692	3356	1903	11566	3102	924	597	0.739053	0.61	4.49951	0.14	0.5	0.5	0	0	2
E17.5_EYFP_TGTTGTGCATAGCAGG-1	E17.5_EYFP	6519	2447	NA	NA	13.7905	-0.186162	-0.149044	G1	E17.5_EYFP	16285	3067	NA	1	5	10x_5	10x	NA	10580	7983	1417	922	3654	1541	322	263	0.559211	0.09	8.74367	0.98	0.60089	0.39911	5	5	1
E17.5_EYFP_TTAATCGAGCTCCTTA-1	E17.5_EYFP	13929	3293	NA	NA	9.34023	0.0842799	-0.160576	S	E17.5_EYFP	16922	3282	NA	1	5	10x_5	10x	NA	25312	16787	1951	1055	9485	2383	719	465	0.84533	0.87	5.87123	0.6	0.558873	0.441127	5	5	1
E17.5_EYFP_TTAGTCAAGGACGTAA-1	E17.5_EYFP	31298	5289	NA	NA	4.37408	-0.306173	-0.294701	G1	E17.5_EYFP	18422	4782	NA	0	1	10x_1	10x	NA	38420	23546	3481	1975	23842	4093	1662	947	0.709787	0.5	6.03222	0.66	0.5	0.5	1	1	0
E17.5_EYFP_TTCAGGTAGATTCCTT-1	E17.5_EYFP	30918	6556	NA	NA	5.69895	-0.206157	-0.324452	G1	E17.5_EYFP	18502	6122	NA	2	3	10x_3	10x	NA	5381	4932	12076	4031	13814	3803	1589	886	0.710227	0.51	4.42171	0.12	0.499383	0.500617	3	3	2
E17.5_EYFP_TTCATCCCAGGACCTT-1	E17.5_EYFP	15503	4038	NA	NA	7.66303	-0.193317	-0.184358	G1	E17.5_EYFP	16939	4017	NA	2	1	10x_1	10x	NA	22220	15627	2222	1270	10790	3077	887	579	0.67091	0.37	6.40294	0.79	0.5	0.5	1	1	2
E17.5_EYFP_TTCCTTGAGGTCATTA-1	E17.5_EYFP	19526	4097	NA	NA	2.86285	-0.186377	-0.255425	G1	E17.5_EYFP	18296	4081	NA	2	3	10x_3	10x	NA	10374	8883	2565	1365	14597	3201	1118	665	0.761584	0.67	6.93269	0.88	0.578098	0.421902	3	3	2
E17.5_EYFP_TTCGCAACAATAGTCT-1	E17.5_EYFP	26175	5867	NA	NA	5.88348	0.753619	0.284106	S	E17.5_EYFP	18218	5799	NA	3	0	10x_0	10x	NA	30221	20566	12919	3838	8560	2783	1124	619	0.677328	0.4	4.52321	0.14	0.444312	0.555688	0	0	3
E17.5_EYFP_TTGAGGCGTTTGCGCC-1	E17.5_EYFP	6562	2273	NA	NA	6.99482	-0.111388	-0.0972484	G1	E17.5_EYFP	16281	2880	NA	2	3	10x_3	10x	NA	24298	16750	1004	633	4520	1645	358	257	0.824026	0.83	5.4128	0.44	0.463354	0.536646	3	3	2
E17.5_EYFP_TTGCAACAGTAACCCG-1	E17.5_EYFP	13302	3914	NA	NA	6.1269	-0.219762	-0.113814	G1	E17.5_EYFP	17030	3892	NA	2	3	10x_3	10x	NA	36855	23084	6725	2400	4161	1851	641	409	0.700302	0.47	5.41463	0.44	0.629222	0.370778	3	3	2
E17.5_EYFP_TTGCTTTAGAGGAGGA-1	E17.5_EYFP	16124	4173	NA	NA	10.3882	-0.18145	0.764089	G2M	E17.5_EYFP	17016	4164	NA	4	2	10x_2	10x	NA	27273	17555	3146	1747	9830	2926	885	558	0.650739	0.3	6.3948	0.78	0.494021	0.505979	2	2	4
E17.5_EYFP_TTTAAGCCACTAAGCC-1	E17.5_EYFP	15601	4166	NA	NA	6.35216	-0.198992	-0.225213	G1	E17.5_EYFP	17010	4153	NA	4	2	10x_2	10x	NA	16143	11506	8455	2659	4399	1862	649	436	0.891234	0.93	5.16799	0.34	0.543694	0.456306	2	2	4
E17.5_EYFP_TTTGCGGAGAAACTGG-1	E17.5_EYFP	11265	2887	NA	NA	13.7417	-0.0508267	-0.190161	G1	E17.5_EYFP	16840	2870	NA	1	5	10x_5	10x	NA	22901	15860	2385	1200	6464	1906	499	349	0.688071	0.43	5.39515	0.43	0.495386	0.504614	5	5	1
E17.5_EYFP_TTTGTTGGTTGTTGTC-1	E17.5_EYFP	35295	6665	NA	NA	4.58139	0.0334149	1.35716	G2M	E17.5_EYFP	17866	5287	NA	3	0	10x_0	10x	NA	56491	27728	18383	4770	10994	3346	1648	882	0.686119	0.43	5.29609	0.38	0.491674	0.508326	0	0	3
E14.5_EYFP_AAACCGAAGTAAAGGT-1	E14.5_EYFP	10307	3049	NA	NA	2.98826	-0.160351	-0.169548	G1	E14.5_EYFP	17166	3035	NA	4	2	10x_2	10x	NA	37325	22520	1571	982	7571	2221	538	398	0.663534	0.35	3.849	0.04	0.616183	0.383817	2	2	4
E14.5_EYFP_AAACGCGCAACCTAAT-1	E14.5_EYFP	18630	5264	NA	NA	13.5212	0.228974	-0.210982	S	E14.5_EYFP	18210	5231	NA	0	1	10x_1	10x	NA	65672	33996	7516	3241	6776	2703	893	621	0.749648	0.65	4.98529	0.28	0.5	0.5	1	1	0
E14.5_EYFP_AAAGCCGCAATTTGGT-1	E14.5_EYFP	19092	4968	NA	NA	2.8546	-0.274997	-0.231316	G1	E14.5_EYFP	18334	4944	NA	2	1	10x_1	10x	NA	20614	15986	4755	2362	11871	3281	1075	695	0.662309	0.34	4.99888	0.28	0.634522	0.365478	1	1	2
E14.5_EYFP_AAAGCGGGTCTTGCAT-1	E14.5_EYFP	17988	4604	NA	NA	8.89482	-0.0550002	-0.216884	G1	E14.5_EYFP	17876	4576	NA	1	5	10x_5	10x	NA	5442	4755	5086	2367	9798	2783	768	524	0.58753	0.14	6.2971	0.75	0.440202	0.559798	5	5	1
E14.5_EYFP_AACTAGTGTGGGTACT-1	E14.5_EYFP	16983	4322	NA	NA	9.45652	-0.135618	-0.207381	G1	E14.5_EYFP	17323	4308	NA	5	4	10x_4	10x	NA	43633	26116	10296	3045	2996	1598	659	388	0.791156	0.76	4.62697	0.17	0.594245	0.405755	4	4	5
E14.5_EYFP_AAGCCTCCAGCTAATT-1	E14.5_EYFP	27236	5543	NA	NA	7.7728	0.159496	-0.163528	S	E14.5_EYFP	18289	5392	NA	1	6_1	10x_6_1	10x	NA	29611	19745	15650	4021	6222	2336	1151	635	0.810269	0.8	4.34561	0.1	0.51106	0.48894	6	6_1	1
E14.5_EYFP_AAGCGAATCGTAACGT-1	E14.5_EYFP	7816	2832	NA	NA	13.8306	0.0588651	-0.160635	S	E14.5_EYFP	16455	3107	NA	2	1	10x_1	10x	NA	4982	4476	1524	908	4594	2013	347	269	0.638254	0.26	7.19912	0.92	0.503014	0.496986	1	1	2
E14.5_EYFP_AAGCGTTTCCCTCGCA-1	E14.5_EYFP	23160	5303	NA	NA	7.17617	-0.187808	-0.238836	G1	E14.5_EYFP	18528	5282	NA	1	4	10x_4	10x	NA	22041	15359	9280	3377	10149	2758	1057	674	0.743616	0.63	4.94768	0.27	0.499199	0.500801	4	4	1
E14.5_EYFP_AAGGATTAGGACCAGG-1	E14.5_EYFP	38966	5391	NA	NA	10.0703	-0.187566	-0.161384	G1	E14.5_EYFP	17915	3695	NA	1	5	10x_5	10x	NA	4426	4013	5365	2220	26561	4176	1786	1000	0.510204	0.05	6.25988	0.74	0.406291	0.593709	5	5	1
E14.5_EYFP_AAGGTCAAGCGGATAA-1	E14.5_EYFP	7165	2882	NA	NA	11.3747	-0.173738	-0.114503	G1	E14.5_EYFP	16546	3297	NA	3	0	10x_0	10x	NA	36496	21596	3688	1800	1889	1131	319	236	0.792803	0.77	5.03864	0.3	0.5	0.5	0	0	3
E14.5_EYFP_AAGTGCAAGCAAGGTA-1	E14.5_EYFP	6225	2773	NA	NA	10.1044	-0.0556701	-0.00556835	G1	E14.5_EYFP	15911	3452	NA	0	1	10x_1	10x	NA	23421	16885	1195	823	3840	1983	384	324	0.909518	0.94	4.99955	0.28	0.570203	0.429797	1	1	0
E14.5_EYFP_AAGTTTGTCGTTCACC-1	E14.5_EYFP	19802	4817	NA	NA	9.29199	0.236922	-0.174171	S	E14.5_EYFP	18377	4785	NA	1	4	10x_4	10x	NA	46646	28045	10983	3192	4722	2016	742	446	0.656337	0.32	4.36495	0.11	0.537484	0.462516	4	4	1
E14.5_EYFP_AATAACCGTGAGACTC-1	E14.5_EYFP	17862	4393	NA	NA	6.86373	-0.207224	-0.174993	G1	E14.5_EYFP	17780	4361	NA	1	5	10x_5	10x	NA	3062	2818	5305	2251	9812	2611	832	554	0.845411	0.87	4.8312	0.23	0.549177	0.450823	5	5	1
E14.5_EYFP_AATCAGGAGGTGCGGA-1	E14.5_EYFP	17618	4184	NA	NA	13.2308	-0.178752	-0.0440177	G1	E14.5_EYFP	17621	4175	NA	1	4	10x_4	10x	NA	6578	5847	10472	2981	2687	1387	653	382	0.529986	0.06	4.83654	0.24	0.563057	0.436943	4	4	1
E14.5_EYFP_AATTAGGCAAGACTCC-1	E14.5_EYFP	20805	5453	NA	NA	6.84451	-0.254101	0.23474	G2M	E14.5_EYFP	18491	5384	NA	0	1	10x_1	10x	NA	46251	26759	4938	2466	12467	3851	1163	792	0.593236	0.15	4.72977	0.2	0.5	0.5	1	1	0
E14.5_EYFP_AATTGTGTCCGTTAAA-1	E14.5_EYFP	15994	4439	NA	NA	7.31524	-0.0804519	-0.0893554	G1	E14.5_EYFP	17007	4418	NA	4	2	10x_2	10x	NA	51188	30084	7889	2879	5219	1971	704	437	0.745022	0.63	4.59133	0.16	0.5	0.5	2	2	4
E14.5_EYFP_ACAAAGGTCGCTCCAT-1	E14.5_EYFP	13208	3394	NA	NA	4.73955	-0.175595	-0.159835	G1	E14.5_EYFP	16996	3386	NA	5	1	10x_1	10x	NA	23942	15768	1891	1095	9657	2530	624	432	0.613851	0.2	6.01217	0.65	0.520089	0.479911	1	1	5
E14.5_EYFP_ACAAAGGTCTTAATGG-1	E14.5_EYFP	5979	2415	NA	NA	14.8687	-0.131888	-0.0370202	G1	E14.5_EYFP	16053	3219	NA	5	1	10x_1	10x	NA	19343	14581	1216	702	3383	1741	295	218	0.741523	0.62	5.82299	0.59	0.502719	0.497281	1	1	5
E14.5_EYFP_ACAGCCGGTAGTTGGC-1	E14.5_EYFP	16621	4404	NA	NA	9.39775	-0.0375779	-0.122012	G1	E14.5_EYFP	17168	4380	NA	1	7	10x_7	10x	NA	33921	21006	9603	2970	3583	1725	615	394	0.737732	0.6	4.78339	0.22	0.537762	0.462238	7	7	1
E14.5_EYFP_ACAGCCGGTGATCAGC-1	E14.5_EYFP	25451	5802	NA	NA	5.11178	-0.132014	1.33901	G2M	E14.5_EYFP	18063	5763	NA	0	0	10x_0	10x	NA	76794	39630	14238	3997	6866	2615	1109	668	0.596068	0.16	4.27947	0.09	0.446647	0.553353	0	0	0
E14.5_EYFP_ACCAGGACAAGTAAGC-1	E14.5_EYFP	22450	5350	NA	NA	8.32071	0.593295	0.0286581	S	E14.5_EYFP	18455	5317	NA	1	4	10x_4	10x	NA	43037	25780	9906	3521	8370	2545	1030	666	0.929316	0.95	4.80346	0.23	0.542983	0.457017	4	4	1
E14.5_EYFP_ACCATAATCAAGCTAC-1	E14.5_EYFP	18368	4088	NA	NA	13.2731	-0.139009	-0.125013	G1	E14.5_EYFP	18059	4071	NA	1	6_1	10x_6_1	10x	NA	20763	14837	4031	1668	10221	2856	856	583	0.682346	0.41	6.21586	0.73	0.498208	0.501792	6	6_1	1
E14.5_EYFP_ACCATTAAGGTGCTGC-1	E14.5_EYFP	21910	5301	NA	NA	4.6189	-0.217488	-0.154876	G1	E14.5_EYFP	18406	5263	NA	4	9	10x_9	10x	NA	45698	27182	11940	3601	6403	2420	1091	624	0.784031	0.74	3.82629	0.04	0.489879	0.510121	9	9	4
E14.5_EYFP_ACCTAAGGTTATTGCC-1	E14.5_EYFP	11452	3582	NA	NA	6.02515	-0.0939947	-0.221436	G1	E14.5_EYFP	16991	3574	NA	0	1	10x_1	10x	NA	12179	9932	4798	2163	4882	1830	502	339	0.575448	0.12	4.99556	0.28	0.527029	0.472971	1	1	0
E14.5_EYFP_ACCTGGATCTTGAGCG-1	E14.5_EYFP	6469	2661	NA	NA	9.80059	-0.146577	-0.0896406	G1	E14.5_EYFP	16521	3257	NA	0	1	10x_1	10x	NA	24729	17365	2992	1439	2034	1224	329	253	0.733399	0.58	4.84127	0.24	0.490472	0.509528	1	1	0
E14.5_EYFP_ACGAAGTCAAAGCGCA-1	E14.5_EYFP	17717	4151	NA	NA	8.74866	-0.137323	-0.11657	G1	E14.5_EYFP	17706	4141	NA	1	6_1	10x_6_1	10x	NA	5284	4618	10513	2774	3529	1701	647	417	0.945701	0.96	6.34396	0.76	0.598961	0.401039	6	6_1	1
E14.5_EYFP_ACGATTCAGCAGGTGG-1	E14.5_EYFP	9361	3399	NA	NA	9.20842	-0.296187	0.0372099	G2M	E14.5_EYFP	16745	3396	NA	5	8_1	10x_8_1	10x	NA	30319	17843	4287	1994	3282	1530	394	288	0.789715	0.75	4.87138	0.25	0.495268	0.504732	8	8_1	5
E14.5_EYFP_ACTAACCAGTTATCCT-1	E14.5_EYFP	20818	5055	NA	NA	5.80267	-0.201236	-0.167979	G1	E14.5_EYFP	18495	5029	NA	0	1	10x_1	10x	NA	42554	26258	10189	3232	6966	2556	980	585	0.723558	0.55	4.44387	0.13	0.5	0.5	1	1	0
E14.5_EYFP_ACTAACGGTCCAAGAC-1	E14.5_EYFP	18718	4595	NA	NA	7.41532	-0.257453	-0.236915	G1	E14.5_EYFP	18153	4567	NA	1	4	10x_4	10x	NA	4429	4049	10224	3066	5004	1994	849	504	0.851175	0.88	4.77482	0.22	0.510461	0.489539	4	4	1
E14.5_EYFP_ACTAGGCGTCACACCC-1	E14.5_EYFP	17955	5197	NA	NA	10.103	-0.0231673	-0.0666395	G1	E14.5_EYFP	17866	5163	NA	4	2	10x_2	10x	NA	35229	21048	8893	3389	5357	2381	782	520	0.650635	0.29	6.19502	0.72	0.466185	0.533815	2	2	4
E14.5_EYFP_ACTTAGGGTAGCTAAT-1	E14.5_EYFP	9666	3397	NA	NA	8.96958	-0.173122	-0.197939	G1	E14.5_EYFP	17295	3374	NA	0	1	10x_1	10x	NA	15305	11855	4623	1996	3042	1591	487	335	0.736057	0.59	5.12226	0.32	0.45887	0.54113	1	1	0
E14.5_EYFP_ACTTAGTCATTGCGTA-1	E14.5_EYFP	18248	3873	NA	NA	4.44432	-0.241333	-0.244529	G1	E14.5_EYFP	18002	3843	NA	1	5	10x_5	10x	NA	20606	14249	2169	1322	13819	2979	944	613	0.599159	0.16	6.76077	0.85	0.578765	0.421235	5	5	1
E14.5_EYFP_AGAACCGCAGCATGTC-1	E14.5_EYFP	9974	3666	NA	NA	5.57449	-0.226282	-0.231649	G1	E14.5_EYFP	17113	3633	NA	2	1	10x_1	10x	NA	36660	23666	3714	1826	4764	2115	527	378	0.690214	0.44	5.33676	0.4	0.5	0.5	1	1	2
E14.5_EYFP_AGACAATAGTTTGCGG-1	E14.5_EYFP	19100	4654	NA	NA	8.98953	0.0830017	-0.0735522	S	E14.5_EYFP	18260	4633	NA	0	0	10x_0	10x	NA	48266	28855	10907	3190	4150	1864	727	470	0.664559	0.35	4.0416	0.06	0.5	0.5	0	0	0
E14.5_EYFP_AGAGAGGAGCTTAGCG-1	E14.5_EYFP	22896	4895	NA	NA	8.97973	0.0734789	-0.182827	S	E14.5_EYFP	18323	4868	NA	1	4	10x_4	10x	NA	34886	22118	14420	3625	3487	1709	891	501	0.587577	0.14	3.68612	0.03	0.5	0.5	4	4	1
E14.5_EYFP_AGAGGATGTGTGCACG-1	E14.5_EYFP	18437	4532	NA	NA	5.03336	-0.137951	-0.0993725	G1	E14.5_EYFP	18068	4512	NA	1	4	10x_4	10x	NA	49348	28629	11693	3325	3314	1573	721	417	0.832735	0.85	4.92242	0.26	0.501133	0.498867	4	4	1
E14.5_EYFP_AGCAAATAGCAAACCT-1	E14.5_EYFP	5077	2079	NA	NA	14.8119	-0.104035	-0.0315888	G1	E14.5_EYFP	16280	3290	NA	2	1	10x_1	10x	NA	32508	21638	1009	614	2932	1468	228	183	0.73113	0.58	6.13993	0.7	0.514173	0.485827	1	1	2
E14.5_EYFP_AGCCTAGTCCGCCTAT-1	E14.5_EYFP	31215	5510	NA	NA	6.33349	-0.146485	-0.319977	G1	E14.5_EYFP	18572	4999	NA	5	1	10x_1	10x	NA	5084	4601	4823	2270	21930	4147	1455	925	0.64794	0.28	4.63918	0.17	0.578929	0.421071	1	1	5
E14.5_EYFP_AGCTGCTCACGTTACA-1	E14.5_EYFP	7715	2177	NA	NA	12.4303	-0.157523	-0.135054	G1	E14.5_EYFP	16617	2599	NA	1	5	10x_5	10x	NA	10959	8818	1603	848	4542	1385	254	200	0.850446	0.88	6.19079	0.72	0.492789	0.507211	5	5	1
E14.5_EYFP_AGGAAACGTAACGGGA-1	E14.5_EYFP	21480	5460	NA	NA	9.57635	0.18508	0.983747	G2M	E14.5_EYFP	18481	5394	NA	3	0	10x_0	10x	NA	93920	42219	10553	3462	6029	2677	930	570	0.867232	0.9	4.72134	0.2	0.482655	0.517345	0	0	3
E14.5_EYFP_AGGACGTAGTTATGGC-1	E14.5_EYFP	20242	5104	NA	NA	8.64539	-0.259522	-0.180168	G1	E14.5_EYFP	18506	5078	NA	5	4	10x_4	10x	NA	6085	5424	9329	3508	7044	2260	922	544	0.690939	0.45	3.84878	0.04	0.547294	0.452706	4	4	5
E14.5_EYFP_AGGAGCTAGTGGCGGA-1	E14.5_EYFP	11914	3493	NA	NA	14.8145	-0.0876409	-0.138605	G1	E14.5_EYFP	17072	3474	NA	3	0	10x_0	10x	NA	48609	29639	6222	2196	2407	1402	488	319	0.723369	0.55	4.71275	0.2	0.518767	0.481233	0	0	3
E14.5_EYFP_AGGATCCGTAGACAAA-1	E14.5_EYFP	15589	4123	NA	NA	5.00353	-0.183374	-0.198164	G1	E14.5_EYFP	17028	4091	NA	4	2	10x_2	10x	NA	16210	12376	8493	2641	4284	1803	683	417	0.831399	0.84	4.4047	0.11	0.5	0.5	2	2	4
E14.5_EYFP_AGGTCTTAGTAACGAG-1	E14.5_EYFP	10621	3786	NA	NA	5.31023	-0.239507	-0.163281	G1	E14.5_EYFP	17410	3761	NA	0	0	10x_0	10x	NA	48074	28807	5996	2455	2768	1534	503	359	0.720009	0.54	4.09069	0.06	0.551563	0.448437	0	0	0
E14.5_EYFP_AGTAATGCAATTAAGG-1	E14.5_EYFP	11111	4019	NA	NA	5.49905	-0.0738693	-0.242574	G1	E14.5_EYFP	16883	4004	NA	0	1	10x_1	10x	NA	24610	17325	4217	2236	5193	2124	633	440	0.816848	0.82	5.75267	0.56	0.5	0.5	1	1	0
E14.5_EYFP_AGTGCACGTCCGTAGG-1	E14.5_EYFP	21190	5183	NA	NA	7.42331	0.649168	0.147597	S	E14.5_EYFP	18454	5159	NA	4	2	10x_2	10x	NA	51097	30899	11671	3513	5414	2267	822	499	0.710998	0.51	3.96017	0.05	0.550073	0.449927	2	2	4
E14.5_EYFP_AGTTTGATCTAGCTTT-1	E14.5_EYFP	16690	4760	NA	NA	4.79329	-0.157238	-0.156052	G1	E14.5_EYFP	17125	4740	NA	0	1	10x_1	10x	NA	41578	26024	8538	3172	5540	2092	792	494	0.792447	0.76	5.15733	0.33	0.5	0.5	1	1	0
E14.5_EYFP_ATCAGGTTCGTTTCGC-1	E14.5_EYFP	11270	3774	NA	NA	0.736469	0.417026	-0.00530148	S	E14.5_EYFP	16756	3754	NA	0	1	10x_1	10x	NA	17412	12243	2809	1600	7218	2548	688	503	0.509284	0.05	6.04219	0.66	0.5	0.5	1	1	0
E14.5_EYFP_ATCATCAAGAAAGCAT-1	E14.5_EYFP	20439	5158	NA	NA	7.63736	0.126942	0.216645	G2M	E14.5_EYFP	18450	5138	NA	0	0	10x_0	10x	NA	69910	36226	11327	3520	5029	2229	875	527	0.69586	0.46	4.70499	0.2	0.607187	0.392813	0	0	0
E14.5_EYFP_ATCCCGCGTAGACAAA-1	E14.5_EYFP	20833	5173	NA	NA	9.09615	0.628644	0.101563	S	E14.5_EYFP	18485	5138	NA	1	4	10x_4	10x	NA	43052	27047	12090	3673	4464	2051	815	502	0.799163	0.78	4.46049	0.13	0.595115	0.404885	4	4	1
E14.5_EYFP_ATCGGCCAGCTTAGCG-1	E14.5_EYFP	13071	3869	NA	NA	11.4605	0.00897481	-0.144953	S	E14.5_EYFP	16951	3846	NA	3	0	10x_0	10x	NA	28803	19845	7265	2556	2760	1482	524	357	0.792219	0.76	5.37116	0.41	0.51375	0.48625	0	0	3
E14.5_EYFP_ATGCAAACAGGTTAAA-1	E14.5_EYFP	25259	5451	NA	NA	7.58542	0.242558	-0.182804	S	E14.5_EYFP	17995	5425	NA	1	4	10x_4	10x	NA	41126	25465	13387	3723	6962	2366	1009	584	0.978397	0.97	4.98901	0.28	0.551574	0.448426	4	4	1
E14.5_EYFP_ATGCCTGAGTCAATCA-1	E14.5_EYFP	21977	5404	NA	NA	7.13473	0.690785	0.766971	G2M	E14.5_EYFP	18493	5371	NA	6	4	10x_4	10x	NA	58155	27700	12373	3765	5512	2225	958	551	0.643255	0.27	5.15227	0.33	0.5	0.5	4	4	6
E14.5_EYFP_ATGCTTAAGACTCGCA-1	E14.5_EYFP	22149	5088	NA	NA	9.76568	0.201571	-0.131407	S	E14.5_EYFP	18436	5067	NA	1	4	10x_4	10x	NA	41330	24731	12688	3657	4880	1883	869	535	0.898863	0.93	4.97967	0.28	0.504967	0.495033	4	4	1
E14.5_EYFP_ATGCTTAAGTGAACCT-1	E14.5_EYFP	11067	3434	NA	NA	7.44556	-0.156435	-0.106978	G1	E14.5_EYFP	16891	3415	NA	1	5	10x_5	10x	NA	5288	4647	2330	1263	6864	2491	682	486	0.694517	0.45	5.70793	0.56	0.494562	0.505438	5	5	1
E14.5_EYFP_ATGGCCGGTGAGGTGA-1	E14.5_EYFP	23816	5443	NA	NA	5.66426	0.295078	0.518396	G2M	E14.5_EYFP	18419	5411	NA	3	0	10x_0	10x	NA	59799	32071	14605	3808	4552	2245	1094	574	0.702391	0.48	4.05736	0.06	0.619024	0.380976	0	0	3
E14.5_EYFP_ATGGCCGGTTGTAACG-1	E14.5_EYFP	32072	5918	NA	NA	6.39187	0.562549	0.771363	G2M	E14.5_EYFP	18115	5162	NA	1	4	10x_4	10x	NA	82194	36960	19207	4438	6670	2363	1296	704	0.68946	0.44	4.90041	0.25	0.585076	0.414924	4	4	1
E14.5_EYFP_ATGTCCACACCAGCAT-1	E14.5_EYFP	17039	4265	NA	NA	14.3436	-0.0915854	-0.0508703	G1	E14.5_EYFP	17310	4230	NA	2	1	10x_1	10x	NA	27903	18711	6787	2508	6264	2158	685	473	0.660562	0.33	5.26973	0.37	0.477436	0.522564	1	1	2
E14.5_EYFP_ATGTCCACACTTAACG-1	E14.5_EYFP	32003	6041	NA	NA	9.20539	0.287231	-0.0578437	S	E14.5_EYFP	18125	5296	NA	1	7	10x_7	10x	NA	22774	15406	18537	4374	6900	2605	1228	654	0.604478	0.18	4.25292	0.09	0.501141	0.498859	7	7	1
E14.5_EYFP_ATGTCCACAGGTATTT-1	E14.5_EYFP	12915	4100	NA	NA	5.33488	0.09115	-0.106734	S	E14.5_EYFP	16941	4084	NA	2	3	10x_3	10x	NA	37535	23723	5490	2382	5456	2087	605	429	0.763727	0.69	4.84858	0.24	0.5	0.5	3	3	2
E14.5_EYFP_ATTAGGTGTTGTTGTC-1	E14.5_EYFP	14220	3956	NA	NA	2.84107	-0.170335	-0.191829	G1	E14.5_EYFP	17010	3947	NA	4	2	10x_2	10x	NA	10731	7829	2951	1737	9512	2707	881	558	0.606138	0.19	6.50234	0.81	0.563864	0.436136	2	2	4
E14.5_EYFP_ATTCCTCCAAGGTAAC-1	E14.5_EYFP	16440	4205	NA	NA	8.66788	-0.12824	-0.0806499	G1	E14.5_EYFP	17114	4180	NA	1	6_1	10x_6_1	10x	NA	34502	21309	8144	2551	5112	2012	614	401	0.656268	0.32	3.95137	0.04	0.510128	0.489872	6	6_1	1
E14.5_EYFP_ATTGGCTAGGTCCACA-1	E14.5_EYFP	15819	4329	NA	NA	6.06865	-0.224144	-0.145076	G1	E14.5_EYFP	16938	4303	NA	2	1	10x_1	10x	NA	44438	25361	3349	1791	10071	3066	954	611	0.742129	0.62	6.03637	0.66	0.506627	0.493373	1	1	2
E14.5_EYFP_CAAAGTGAGGAGGTTA-1	E14.5_EYFP	24800	4913	NA	NA	11.0282	-0.210039	-0.148571	G1	E14.5_EYFP	18122	4880	NA	1	4	10x_4	10x	NA	71288	36496	14032	3397	5022	2051	904	487	0.762679	0.68	4.88042	0.25	0.555707	0.444293	4	4	1
E14.5_EYFP_CAAGGCCTCAAATCGC-1	E14.5_EYFP	13986	3864	NA	NA	7.94366	-0.159507	0.608816	G2M	E14.5_EYFP	16944	3853	NA	5	0	10x_0	10x	NA	26671	17977	9045	2774	1901	1194	538	337	0.685292	0.43	4.05059	0.06	0.642254	0.357746	0	0	5
E14.5_EYFP_CAATATGTCCCTGATC-1	E14.5_EYFP	41877	7190	NA	NA	5.75734	0.16878	1.44146	G2M	E14.5_EYFP	17170	4972	NA	4	2	10x_2	10x	NA	49008	27107	23082	5235	11338	3650	1798	958	0.856894	0.89	5.3335	0.4	0.5	0.5	2	2	4
E14.5_EYFP_CAATGTGGTAATTAGC-1	E14.5_EYFP	21242	4823	NA	NA	4.41107	-0.151137	-0.219903	G1	E14.5_EYFP	18426	4795	NA	1	6_1	10x_6_1	10x	NA	5999	4889	7030	2761	11413	2796	1020	639	0.567929	0.11	6.13994	0.7	0.504266	0.495734	6	6_1	1
E14.5_EYFP_CACAGGGAGGGATGCG-1	E14.5_EYFP	18179	4375	NA	NA	10.9082	-0.124343	-0.239885	G1	E14.5_EYFP	17943	4362	NA	1	6_1	10x_6_1	10x	NA	31202	17095	11671	3367	2147	1227	724	429	0.560424	0.1	5.39796	0.43	0.747385	0.252615	6	6_1	1
E14.5_EYFP_CACTAGCCACGAATTT-1	E14.5_EYFP	27699	6226	NA	NA	8.15914	0.374606	0.980233	G2M	E14.5_EYFP	18401	6048	NA	3	0	10x_0	10x	NA	74350	33002	12472	4005	9768	3341	1225	734	0.689949	0.44	4.47962	0.13	0.466586	0.533414	0	0	3
E14.5_EYFP_CACTGACCAAACAACA-1	E14.5_EYFP	24948	5533	NA	NA	10.1371	0.00949979	-0.217498	S	E14.5_EYFP	18202	5498	NA	5	6_1	10x_6_1	10x	NA	28405	19081	14046	3945	5423	2335	1103	630	0.596264	0.16	4.53949	0.15	0.5	0.5	6	6_1	5
E14.5_EYFP_CACTTTGTCATTGCGG-1	E14.5_EYFP	11217	3620	NA	NA	8.50495	-0.0805733	-0.0742291	G1	E14.5_EYFP	16846	3595	NA	4	2	10x_2	10x	NA	40611	25034	2890	1502	6324	2354	512	356	0.650933	0.3	4.66258	0.18	0.525412	0.474588	2	2	4
E14.5_EYFP_CAGCCTAAGCTCGCTT-1	E14.5_EYFP	29806	5265	NA	NA	6.237	-0.208581	-0.270877	G1	E14.5_EYFP	18587	4859	NA	5	1	10x_1	10x	NA	54781	29030	7399	2730	17689	3458	1310	793	0.735893	0.59	6.12703	0.69	0.519425	0.480575	1	1	5
E14.5_EYFP_CAGCTATAGCATTAGC-1	E14.5_EYFP	28698	6308	NA	NA	3.81908	0.312191	0.920076	G2M	E14.5_EYFP	18593	6087	NA	0	2	10x_2	10x	NA	31374	19784	10055	3970	14582	3676	1539	921	0.659759	0.33	5.84572	0.6	0.5	0.5	2	2	0
E14.5_EYFP_CAGGACCTCATTATGG-1	E14.5_EYFP	13026	3542	NA	NA	13.4116	0.539642	0.356586	S	E14.5_EYFP	16936	3531	NA	1	5	10x_5	10x	NA	15076	12167	2297	1330	7933	2499	593	454	0.636426	0.25	5.35881	0.41	0.558349	0.441651	5	5	1
E14.5_EYFP_CAGTACCCAACTAGCC-1	E14.5_EYFP	15062	3777	NA	NA	0.112867	-0.132438	1.1471	G2M	E14.5_EYFP	16980	3761	NA	1	5	10x_5	10x	NA	48476	25233	2653	1413	11091	2864	867	603	0.599582	0.17	6.25382	0.73	0.552906	0.447094	5	5	1
E14.5_EYFP_CATAGGTTCAGGTTTA-1	E14.5_EYFP	19312	4710	NA	NA	6.34321	-0.262497	-0.131581	G1	E14.5_EYFP	18283	4684	NA	1	4	10x_4	10x	NA	26862	18393	10246	3154	5793	2098	723	445	0.800618	0.78	5.01995	0.29	0.5	0.5	4	4	1
E14.5_EYFP_CATGAGGCACTGACTA-1	E14.5_EYFP	34899	6579	NA	NA	9.00599	0.293338	0.700323	G2M	E14.5_EYFP	18187	5218	NA	0	1	10x_1	10x	NA	17648	13124	10409	3782	17627	4266	1973	1092	0.512298	0.05	5.63034	0.52	0.546371	0.453629	1	1	0
E14.5_EYFP_CATGCAAGTTCGCGCT-1	E14.5_EYFP	14461	4174	NA	NA	8.64394	-0.0787398	-0.115329	G1	E14.5_EYFP	16929	4150	NA	4	2	10x_2	10x	NA	51522	28877	7591	2640	3770	1783	596	414	0.755661	0.66	5.18829	0.34	0.514515	0.485485	2	2	4
E14.5_EYFP_CATGCGGGTAGCTAAT-1	E14.5_EYFP	31771	5829	NA	NA	3.61651	-0.0916956	1.39145	G2M	E14.5_EYFP	18483	5210	NA	2	1	10x_1	10x	NA	24039	17541	5774	2559	21484	4410	2178	1160	0.802304	0.79	5.5429	0.48	0.53202	0.46798	1	1	2
E14.5_EYFP_CATGGATTCCCGCCTA-1	E14.5_EYFP	15339	4018	NA	NA	8.25999	-0.235186	-0.124301	G1	E14.5_EYFP	16924	4006	NA	3	0	10x_0	10x	NA	23999	16868	3703	1780	8897	2684	792	565	0.789274	0.75	5.76727	0.57	0.505495	0.494505	0	0	3
E14.5_EYFP_CATGGATTCCTCCATA-1	E14.5_EYFP	25959	5275	NA	NA	9.27617	-0.0646982	-0.192381	G1	E14.5_EYFP	18218	5229	NA	1	4	10x_4	10x	NA	12976	10692	12741	3519	7838	2526	1053	615	0.735885	0.59	5.32515	0.39	0.801277	0.198723	4	4	1
E14.5_EYFP_CATTATGAGAGGGACT-1	E14.5_EYFP	26583	5825	NA	NA	6.40635	0.457265	0.687772	G2M	E14.5_EYFP	18187	5701	NA	0	0	10x_0	10x	NA	83957	39088	16257	4145	5058	2438	1007	575	0.579726	0.12	4.16869	0.07	0.545038	0.454962	0	0	0
E14.5_EYFP_CATTGTAAGACAACGA-1	E14.5_EYFP	17810	4822	NA	NA	7.65862	-0.171252	-0.237732	G1	E14.5_EYFP	17765	4793	NA	4	2	10x_2	10x	NA	39010	24242	9096	3189	5475	2190	787	485	0.779437	0.73	4.91108	0.25	0.497598	0.502402	2	2	4
E14.5_EYFP_CCACATTGTGTTTCAC-1	E14.5_EYFP	36515	6969	NA	NA	3.36848	0.228918	0.0350132	S	E14.5_EYFP	17522	5247	NA	1	5	10x_5	10x	NA	7539	6537	17743	4613	13492	3887	1733	953	0.639719	0.26	6.47513	0.8	0.529697	0.470303	5	5	1
E14.5_EYFP_CCATCATGTCATAACG-1	E14.5_EYFP	24789	5262	NA	NA	6.81754	-0.0603552	-0.270917	G1	E14.5_EYFP	18295	5239	NA	1	6_1	10x_6_1	10x	NA	13745	10752	7957	2964	12951	3204	1183	734	0.71596	0.52	4.93786	0.27	0.512538	0.487462	6	6_1	1
E14.5_EYFP_CCGCTTAGTGTCCAAA-1	E14.5_EYFP	17484	4884	NA	NA	8.55067	0.282542	-0.201649	S	E14.5_EYFP	17474	4870	NA	4	2	10x_2	10x	NA	47803	28766	9891	3351	4302	1988	761	507	0.954577	0.97	4.16449	0.07	0.5	0.5	2	2	4
E14.5_EYFP_CCGGTTAAGTTTGAGC-1	E14.5_EYFP	24798	5430	NA	NA	8.58134	-0.0493313	-0.197603	G1	E14.5_EYFP	18159	5402	NA	1	6_1	10x_6_1	10x	NA	42555	23566	13963	3772	5829	2257	945	565	0.626133	0.23	4.11856	0.07	0.496306	0.503694	6	6_1	1
E14.5_EYFP_CCTAAGTAGCGCTCAA-1	E14.5_EYFP	11276	3061	NA	NA	3.87549	-0.175764	-0.158348	G1	E14.5_EYFP	16915	3053	NA	2	1	10x_1	10x	NA	20210	14044	2201	1151	7673	2143	575	422	0.779599	0.73	5.33973	0.4	0.491531	0.508469	1	1	2
E14.5_EYFP_CCTCCTGAGTCTCACC-1	E14.5_EYFP	20784	5628	NA	NA	7.44323	0.816625	0.219594	S	E14.5_EYFP	18554	5588	NA	0	1	10x_1	10x	NA	37944	24678	8373	3439	8738	3047	1049	709	0.717984	0.53	3.88884	0.04	0.548256	0.451744	1	1	0
E14.5_EYFP_CCTTTAGTCTTGACCC-1	E14.5_EYFP	37953	6455	NA	NA	5.74131	0.503248	-0.017206	S	E14.5_EYFP	17239	4434	NA	1	5	10x_5	10x	NA	32106	21508	20260	4408	11166	3173	1436	796	1.01236	0.98	5.37326	0.42	0.508033	0.491967	5	5	1
E14.5_EYFP_CGAACAAAGCATGCAT-1	E14.5_EYFP	30272	6615	NA	NA	8.0074	-0.221457	-0.295403	G1	E14.5_EYFP	18632	5997	NA	5	8_1	10x_8_1	10x	NA	43199	24465	13067	4295	11718	3467	1395	818	0.698927	0.47	5.3981	0.43	0.497218	0.502782	8	8_1	5
E14.5_EYFP_CGAGTCGGTAATGGAA-1	E14.5_EYFP	21993	5119	NA	NA	7.53876	-0.0764606	-0.185409	G1	E14.5_EYFP	18348	5091	NA	4	2	10x_2	10x	NA	3177	2940	12425	3530	5221	2181	861	524	0.6	0.17	5.01814	0.29	0.553334	0.446666	2	2	4
E14.5_EYFP_CGCACAATCAAGCTTA-1	E14.5_EYFP	36062	6715	NA	NA	7.07947	0.627327	1.03762	G2M	E14.5_EYFP	18017	5226	NA	1	5	10x_5	10x	NA	44330	25576	16887	4869	13110	3439	1655	949	0.793186	0.77	5.59325	0.51	0.5	0.5	5	5	1
E14.5_EYFP_CGCATATAGGATGATG-1	E14.5_EYFP	13661	4315	NA	NA	8.33028	-0.155704	-0.188169	G1	E14.5_EYFP	16816	4273	NA	0	1	10x_1	10x	NA	44082	27108	6312	2588	4769	2123	611	434	0.863711	0.9	4.19955	0.08	0.5	0.5	1	1	0
E14.5_EYFP_CGCCTGTGTTGCTGGG-1	E14.5_EYFP	17468	4851	NA	NA	7.36203	-0.0600702	0.544448	G2M	E14.5_EYFP	17498	4831	NA	5	0	10x_0	10x	NA	56583	31532	9739	3287	4336	1954	764	505	0.714924	0.52	4.72251	0.2	0.500879	0.499121	0	0	5
E14.5_EYFP_CGCGGATTCGCTAAAC-1	E14.5_EYFP	15150	4231	NA	NA	6.64026	-0.118117	-0.192779	G1	E14.5_EYFP	16977	4218	NA	1	4	10x_4	10x	NA	42949	25085	8226	2765	4180	1765	642	415	0.83231	0.84	5.05539	0.3	0.510264	0.489736	4	4	1
E14.5_EYFP_CGCTCCATCAGCATTA-1	E14.5_EYFP	21701	4090	NA	NA	5.10576	-0.0347358	-0.212368	G1	E14.5_EYFP	18358	4061	NA	1	5	10x_5	10x	NA	15258	11188	2579	1383	16385	3186	1002	642	0.629928	0.24	7.6188	0.95	0.460729	0.539271	5	5	1
E14.5_EYFP_CGCTTAACAATCGCAC-1	E14.5_EYFP	19766	5161	NA	NA	3.3846	-0.209266	-0.189636	G1	E14.5_EYFP	18402	5135	NA	5	1	10x_1	10x	NA	25335	16842	9580	3280	7322	2634	913	587	0.666817	0.36	5.20809	0.35	0.525239	0.474761	1	1	5
E14.5_EYFP_CGCTTAACACTGACTA-1	E14.5_EYFP	36765	6446	NA	NA	4.3982	0.473651	1.14395	G2M	E14.5_EYFP	17613	4781	NA	4	9	10x_9	10x	NA	50748	28987	20379	4766	10240	2983	1599	835	0.890791	0.93	5.35338	0.41	0.450189	0.549811	9	9	4
E14.5_EYFP_CGGATTAGTAACCACA-1	E14.5_EYFP	22024	5066	NA	NA	14.9019	-0.112289	-0.128447	G1	E14.5_EYFP	18438	5046	NA	5	4	10x_4	10x	NA	64784	34307	10559	3385	5909	2264	861	532	0.668991	0.37	5.07574	0.31	0.510907	0.489093	4	4	5
E14.5_EYFP_CGGATTAGTATTTGGG-1	E14.5_EYFP	21475	4924	NA	NA	8.82887	-0.177209	-0.230876	G1	E14.5_EYFP	18386	4896	NA	1	6_1	10x_6_1	10x	NA	10530	8289	11454	3406	5798	2052	859	493	0.83792	0.85	6.01699	0.65	0.486312	0.513688	6	6_1	1
E14.5_EYFP_CGTAGTTAGAGAGGCT-1	E14.5_EYFP	5360	2284	NA	NA	13.1903	-0.145764	-0.0486402	G1	E14.5_EYFP	16497	3249	NA	0	1	10x_1	10x	NA	10507	8153	1938	1079	2134	1244	270	206	0.673759	0.39	6.05727	0.67	0.608256	0.391744	1	1	0
E14.5_EYFP_CGTAGTTAGGTCTTGG-1	E14.5_EYFP	12299	4407	NA	NA	8.04943	0.808034	0.455974	S	E14.5_EYFP	16669	4381	NA	2	1	10x_1	10x	NA	8446	7138	4454	2352	5592	2434	664	478	0.555419	0.09	5.33286	0.39	0.5	0.5	1	1	2
E14.5_EYFP_CGTATTGCAGGTATTT-1	E14.5_EYFP	12548	3835	NA	NA	8.61492	-0.10543	-0.0648931	G1	E14.5_EYFP	16921	3811	NA	0	1	10x_1	10x	NA	36150	22914	4769	2003	5323	2116	589	415	0.811684	0.8	4.7779	0.22	0.527536	0.472464	1	1	0
E14.5_EYFP_CGTCAATAGTTATCTC-1	E14.5_EYFP	20339	5181	NA	NA	7.08983	-0.0531388	-0.20537	G1	E14.5_EYFP	18494	5154	NA	1	5	10x_5	10x	NA	50115	29683	9569	3249	7035	2609	970	622	0.727941	0.56	5.47436	0.46	0.5	0.5	5	5	1
E14.5_EYFP_CGTTATCGTGATGGCT-1	E14.5_EYFP	24598	5246	NA	NA	13.6718	-0.0470516	-0.0914676	G1	E14.5_EYFP	18135	5199	NA	1	4	10x_4	10x	NA	85806	42735	12667	3404	5841	2360	888	559	0.781541	0.73	4.28715	0.09	0.635236	0.364764	4	4	1
E14.5_EYFP_CTAAAGCTCTTGACCC-1	E14.5_EYFP	9807	3940	NA	NA	0.122362	-0.228526	-0.281772	G1	E14.5_EYFP	17117	3930	NA	0	1	10x_1	10x	NA	9312	7156	5065	2549	3592	1715	561	426	0.743421	0.63	7.01395	0.89	0.431549	0.568451	1	1	0
E14.5_EYFP_CTAATCTTCTCAATTC-1	E14.5_EYFP	31605	6194	NA	NA	7.76143	-0.36818	-0.173296	G1	E14.5_EYFP	18343	5518	NA	1	7	10x_7	10x	NA	10601	9156	14805	4137	11109	3077	1292	716	0.71123	0.51	4.66036	0.18	0.687669	0.312331	7	7	1
E14.5_EYFP_CTACGAAGTGTAATAC-1	E14.5_EYFP	10631	3667	NA	NA	8.5975	-0.208585	-0.14285	G1	E14.5_EYFP	17346	3647	NA	0	1	10x_1	10x	NA	12900	10246	5090	2196	3401	1697	493	346	0.656615	0.32	5.70683	0.55	0.678809	0.321191	1	1	0
E14.5_EYFP_CTAGCTGAGTTATGTG-1	E14.5_EYFP	14487	4359	NA	NA	10.7752	-0.186511	-0.176911	G1	E14.5_EYFP	16846	4342	NA	5	6_1	10x_6_1	10x	NA	79768	41603	4617	2155	6871	2680	751	518	1.15363	1	4.36033	0.11	0.511707	0.488293	6	6_1	5
E14.5_EYFP_CTAGGCGGTTCGGTAA-1	E14.5_EYFP	22942	5127	NA	NA	3.54808	-0.276085	-0.215536	G1	E14.5_EYFP	18460	5096	NA	0	1	10x_1	10x	NA	48555	29597	5202	2588	14864	3379	1244	789	0.79231	0.76	5.1424	0.33	0.5	0.5	1	1	0
E14.5_EYFP_CTAGTAATCCAAGTTA-1	E14.5_EYFP	13051	3950	NA	NA	12.0221	-0.14828	-0.173087	G1	E14.5_EYFP	16901	3919	NA	5	5	10x_5	10x	NA	15384	11675	4363	2078	6002	2201	584	416	0.568047	0.11	5.89975	0.62	0.5	0.5	5	5	5
E14.5_EYFP_CTAGTGAGTTACAAAC-1	E14.5_EYFP	8632	2833	NA	NA	5.23633	-0.109012	-0.137424	G1	E14.5_EYFP	16642	2992	NA	5	1	10x_1	10x	NA	25802	17466	1690	799	5767	2103	459	329	0.95403	0.96	5.0907	0.31	0.510923	0.489077	1	1	5
E14.5_EYFP_CTCATCATCGTTACTT-1	E14.5_EYFP	15064	4229	NA	NA	2.40308	0.500093	-0.0149917	S	E14.5_EYFP	16892	4218	NA	5	1	10x_1	10x	NA	18364	13436	2884	1520	10473	3205	867	560	0.689148	0.44	5.98558	0.64	0.5	0.5	1	1	5
E14.5_EYFP_CTCCATCAGCTGTCAG-1	E14.5_EYFP	15526	4310	NA	NA	8.86899	-0.139453	-0.125776	G1	E14.5_EYFP	16951	4277	NA	3	0	10x_0	10x	NA	24566	17257	7343	2598	4963	2074	675	459	0.713323	0.52	5.27483	0.37	0.5	0.5	0	0	3
E14.5_EYFP_CTCCCTGAGGATGATG-1	E14.5_EYFP	17294	4153	NA	NA	3.99561	-0.128277	-0.230398	G1	E14.5_EYFP	17393	4130	NA	3	0	10x_0	10x	NA	6821	5703	3137	1717	11897	2878	927	602	0.578358	0.12	7.46454	0.94	0.550515	0.449485	0	0	3
E14.5_EYFP_CTCCGGACAGTCTAGC-1	E14.5_EYFP	22471	5036	NA	NA	7.15144	-0.151732	-0.176931	G1	E14.5_EYFP	18347	5008	NA	1	4	10x_4	10x	NA	32628	20606	11653	3455	6882	2152	865	539	0.820586	0.82	4.96961	0.28	0.5	0.5	4	4	1
E14.5_EYFP_CTCCGTCCACCAGCAT-1	E14.5_EYFP	16220	4269	NA	NA	8.19975	-0.152269	-0.175823	G1	E14.5_EYFP	17079	4241	NA	1	4	10x_4	10x	NA	12546	9792	8439	2771	4783	1883	604	415	0.618698	0.21	5.79529	0.58	0.452357	0.547643	4	4	1
E14.5_EYFP_CTCGTTATCCATCAGG-1	E14.5_EYFP	10325	3288	NA	NA	5.49153	-0.0808881	-0.164535	G1	E14.5_EYFP	17531	3270	NA	0	0	10x_0	10x	NA	28934	19777	4229	1704	4381	1756	507	363	0.894853	0.93	5.26467	0.37	0.5	0.5	0	0	0
E14.5_EYFP_CTGGTTTGTAATCCCT-1	E14.5_EYFP	22323	5228	NA	NA	3.87045	-0.0191684	1.88069	G2M	E14.5_EYFP	18411	5179	NA	5	1	10x_1	10x	NA	43936	25047	11846	3468	7121	2589	1065	651	0.729412	0.57	5.4335	0.44	0.537307	0.462693	1	1	5
E14.5_EYFP_CTGTTAAAGCTATATG-1	E14.5_EYFP	12928	4159	NA	NA	11.6878	-0.0917137	0.472619	G2M	E14.5_EYFP	16931	4128	NA	5	0	10x_0	10x	NA	39233	24287	5818	2408	4105	2039	517	367	0.643408	0.27	5.49086	0.46	0.608514	0.391486	0	0	5
E14.5_EYFP_CTGTTTAGTTGAGCCG-1	E14.5_EYFP	10447	3932	NA	NA	8.86379	0.10005	0.281964	G2M	E14.5_EYFP	17255	3915	NA	1	7	10x_7	10x	NA	20845	14757	4596	2237	3828	1966	511	376	0.692602	0.45	5.53544	0.48	0.520684	0.479316	7	7	1
E14.5_EYFP_CTTCAAGCATCATGTG-1	E14.5_EYFP	10162	3536	NA	NA	4.52667	-0.159789	-0.151105	G1	E14.5_EYFP	17440	3509	NA	6	4	10x_4	10x	NA	27166	18283	4377	2017	4285	1706	462	336	0.798618	0.78	5.67492	0.54	0.510046	0.489954	4	4	6
E14.5_EYFP_CTTGCTCAGGACCTTG-1	E14.5_EYFP	15669	4496	NA	NA	4.99075	-0.247613	-0.187729	G1	E14.5_EYFP	16937	4467	NA	0	1	10x_1	10x	NA	37530	24266	6639	2747	6740	2270	676	466	0.654905	0.31	4.43227	0.12	0.51042	0.48958	1	1	0
E14.5_EYFP_CTTTGAGCATTGACAT-1	E14.5_EYFP	27950	5459	NA	NA	3.91055	0.420961	0.210786	S	E14.5_EYFP	18462	5261	NA	2	1	10x_1	10x	NA	25399	18263	3626	2057	20899	4201	1573	973	0.919572	0.95	4.92067	0.26	0.4861	0.5139	1	1	2
E14.5_EYFP_CTTTGTCCAGGCCAAA-1	E14.5_EYFP	13377	4031	NA	NA	7.66988	-0.147742	-0.225233	G1	E14.5_EYFP	16910	4000	NA	0	0	10x_0	10x	NA	43560	26438	4328	1944	6594	2497	720	490	0.678315	0.4	4.39337	0.11	0.5	0.5	0	0	0
E14.5_EYFP_GAATTTGTCATGAGCT-1	E14.5_EYFP	14261	4093	NA	NA	10.0484	-0.220545	-0.103709	G1	E14.5_EYFP	16975	4074	NA	0	2	10x_2	10x	NA	4978	4515	6784	2393	4329	1973	582	402	0.641827	0.27	6.78362	0.86	0.427016	0.572984	2	2	0
E14.5_EYFP_GACATTATCATTGCGG-1	E14.5_EYFP	15704	4231	NA	NA	7.10647	-0.0811564	0.939314	G2M	E14.5_EYFP	16936	4216	NA	1	5	10x_5	10x	NA	14534	10835	6969	2639	6046	2154	705	490	0.549583	0.08	5.76598	0.57	0.460402	0.539598	5	5	1
E14.5_EYFP_GACCTAAGTGTGAGGA-1	E14.5_EYFP	22497	5456	NA	NA	6.05414	0.0630488	-0.238277	S	E14.5_EYFP	18381	5435	NA	0	0	10x_0	10x	NA	28738	20150	13681	3970	4557	2075	951	548	0.669815	0.37	4.01554	0.05	0.599348	0.400652	0	0	0
E14.5_EYFP_GACCTTTGTTAAGTGT-1	E14.5_EYFP	12822	3805	NA	NA	10.8485	-0.153165	-0.109694	G1	E14.5_EYFP	17020	3792	NA	0	0	10x_0	10x	NA	6025	5314	5914	2286	4072	1785	525	381	0.611429	0.2	6.96892	0.89	0.446925	0.553075	0	0	0
E14.5_EYFP_GACTTACAGCTTCCCG-1	E14.5_EYFP	20740	4916	NA	NA	7.81581	-0.131784	-0.176968	G1	E14.5_EYFP	18432	4880	NA	5	4	10x_4	10x	NA	23676	15959	11317	3316	5573	2142	814	501	0.860681	0.9	4.86696	0.24	0.508016	0.491984	4	4	5
E14.5_EYFP_GAGAGGCGTTAGGCGT-1	E14.5_EYFP	12815	4135	NA	NA	5.119	-0.185861	-0.188839	G1	E14.5_EYFP	16930	4109	NA	0	0	10x_0	10x	NA	33337	22844	7008	2732	3611	1690	568	382	0.787524	0.75	4.53108	0.15	0.55872	0.44128	0	0	0
E14.5_EYFP_GAGCAAGGTATTGTGG-1	E14.5_EYFP	7141	2880	NA	NA	8.76628	-0.23134	-0.147404	G1	E14.5_EYFP	16606	3307	NA	4	2	10x_2	10x	NA	5459	4881	4460	2035	1258	827	259	205	0.729622	0.58	4.46446	0.13	0.619175	0.380825	2	2	4
E14.5_EYFP_GAGCGGTCAGAAATGC-1	E14.5_EYFP	14705	4273	NA	NA	6.26318	-0.278991	-0.117358	G1	E14.5_EYFP	16925	4255	NA	1	5	10x_5	10x	NA	37432	23397	6297	2624	6033	2075	751	480	0.717578	0.53	5.01976	0.29	0.5	0.5	5	5	1
E14.5_EYFP_GAGGACTAGAATCTCA-1	E14.5_EYFP	7671	2550	NA	NA	0.351975	-0.120558	-0.20089	G1	E14.5_EYFP	16454	2902	NA	0	1	10x_1	10x	NA	29461	19075	1083	704	5945	1936	398	312	0.605361	0.18	4.89499	0.25	0.632483	0.367517	1	1	0
E14.5_EYFP_GAGGCCTTCTAGCGAT-1	E14.5_EYFP	14161	3990	NA	NA	5.74818	-0.13551	-0.112118	G1	E14.5_EYFP	16966	3965	NA	1	4	10x_4	10x	NA	42770	25164	7463	2596	4316	1697	601	400	0.850625	0.88	5.17264	0.34	0.522951	0.477049	4	4	1
E14.5_EYFP_GAGGTAGGTTGGTTAG-1	E14.5_EYFP	21143	5155	NA	NA	6.09658	0.336637	-0.0418137	S	E14.5_EYFP	18451	5141	NA	0	0	10x_0	10x	NA	42317	26929	11700	3387	5498	2279	900	549	0.686845	0.43	4.23165	0.08	0.730531	0.269469	0	0	0
E14.5_EYFP_GAGGTTAAGATTGAGG-1	E14.5_EYFP	23597	4870	NA	NA	10.1199	-0.179014	-0.189224	G1	E14.5_EYFP	18552	4841	NA	1	6_1	10x_6_1	10x	NA	82941	40634	3301	1781	16189	3706	1041	702	0.822345	0.82	5.12026	0.32	0.598572	0.401428	6	6_1	1
E14.5_EYFP_GAGTAACCAAGGTACG-1	E14.5_EYFP	15597	4550	NA	NA	8.26441	-0.024615	-0.122689	G1	E14.5_EYFP	16925	4528	NA	4	2	10x_2	10x	NA	36256	22653	8252	2986	4274	1959	661	418	0.80006	0.78	4.16505	0.07	0.537259	0.462741	2	2	4
E14.5_EYFP_GAGTATCTCATTTGTC-1	E14.5_EYFP	9993	3304	NA	NA	8.2858	-0.123921	-0.179279	G1	E14.5_EYFP	17250	3291	NA	0	1	10x_1	10x	NA	38955	24319	3412	1646	4731	1863	517	387	0.683878	0.42	5.19207	0.35	0.5	0.5	1	1	0
E14.5_EYFP_GATCAGGCAAAGCTAA-1	E14.5_EYFP	21071	5429	NA	NA	7.93033	-0.255462	-0.276382	G1	E14.5_EYFP	18497	5404	NA	0	0	10x_0	10x	NA	60233	34624	8060	3190	9042	3090	1023	660	0.729139	0.57	4.65704	0.18	0.438832	0.561168	0	0	0
E14.5_EYFP_GATCAGGCATAGACCC-1	E14.5_EYFP	26578	5611	NA	NA	5.72278	0.0144877	-0.197077	S	E14.5_EYFP	18201	5500	NA	1	5	10x_5	10x	NA	48075	29021	14207	3737	7909	2680	1014	607	0.803803	0.79	4.19604	0.08	0.518264	0.481736	5	5	1
E14.5_EYFP_GATGCTTAGTTATGTG-1	E14.5_EYFP	13442	3465	NA	NA	0.796012	-0.0821527	-0.232034	G1	E14.5_EYFP	16998	3441	NA	2	1	10x_1	10x	NA	9449	7413	1520	904	10677	2742	700	488	0.694656	0.45	7.57475	0.95	0.506635	0.493365	1	1	2
E14.5_EYFP_GATTGCAGTTGCCTCA-1	E14.5_EYFP	27947	5944	NA	NA	5.55337	0.526957	-0.157114	S	E14.5_EYFP	18504	5767	NA	0	1	10x_1	10x	NA	28472	20047	9278	3660	14381	3505	1535	902	0.745396	0.64	4.43136	0.12	0.627887	0.372113	1	1	0
E14.5_EYFP_GCCAATTAGTAGGCGG-1	E14.5_EYFP	11580	3442	NA	NA	9.02418	0.0252124	-0.102651	S	E14.5_EYFP	17193	3426	NA	4	2	10x_2	10x	NA	33421	20449	7150	2382	1892	1152	427	298	0.752479	0.66	4.50683	0.14	0.686127	0.313873	2	2	4
E14.5_EYFP_GCCAGGAAGCTTGCTC-1	E14.5_EYFP	21684	5035	NA	NA	5.94448	0.59724	0.204987	S	E14.5_EYFP	18474	5008	NA	2	1	10x_1	10x	NA	47982	28297	4338	2056	14123	3606	1175	765	0.846643	0.87	5.38441	0.42	0.5	0.5	1	1	2
E14.5_EYFP_GCCTGAGGTTAGAGGG-1	E14.5_EYFP	31998	6240	NA	NA	7.57547	0.295972	0.966284	G2M	E14.5_EYFP	18159	5429	NA	1	4	10x_4	10x	NA	51711	29038	18895	4517	6650	2481	1260	663	0.653666	0.31	5.2576	0.36	0.519638	0.480362	4	4	1
E14.5_EYFP_GCTGTGATCAAGGACA-1	E14.5_EYFP	12209	4114	NA	NA	10.566	-0.15303	-0.132236	G1	E14.5_EYFP	16738	4064	NA	0	1	10x_1	10x	NA	40743	24266	5294	2319	4298	2099	595	403	0.777918	0.72	5.28282	0.38	0.530201	0.469799	1	1	0
E14.5_EYFP_GGAACCACACTGGCTG-1	E14.5_EYFP	5124	2012	NA	NA	13.9149	-0.10032	-0.124881	G1	E14.5_EYFP	16401	3227	NA	0	0	10x_0	10x	NA	12882	10402	1083	653	2894	1375	240	190	0.586912	0.13	5.41161	0.43	0.541706	0.458294	0	0	0
E14.5_EYFP_GGACCTCAGTAGCCAT-1	E14.5_EYFP	10920	3952	NA	NA	4.62454	-0.0830575	-0.16828	G1	E14.5_EYFP	16900	3907	NA	0	1	10x_1	10x	NA	27794	19239	4201	2133	5195	2216	603	419	0.702878	0.48	4.70693	0.2	0.5	0.5	1	1	0
E14.5_EYFP_GGCAATCGTTCCTGTG-1	E14.5_EYFP	29993	6294	NA	NA	8.45864	0.752745	0.610316	S	E14.5_EYFP	18516	5877	NA	0	0	10x_0	10x	NA	87234	41369	14432	4109	9625	3296	1233	750	0.685248	0.43	4.02646	0.06	0.537092	0.462908	0	0	0
E14.5_EYFP_GGCCATCAGCATGTCG-1	E14.5_EYFP	20524	5320	NA	NA	3.80043	0.0991708	1.16087	G2M	E14.5_EYFP	18435	5283	NA	0	0	10x_0	10x	NA	69361	35429	10625	3433	6620	2572	907	580	0.812946	0.81	4.70978	0.2	0.47468	0.52532	0	0	0
E14.5_EYFP_GGGAGTAGTGATGAGG-1	E14.5_EYFP	8123	2355	NA	NA	0.0738643	-0.140146	-0.243778	G1	E14.5_EYFP	16756	2680	NA	1	5	10x_5	10x	NA	3839	3344	1152	649	6376	1802	407	306	0.606805	0.19	2.89352	0.01	0.718143	0.281857	5	5	1
E14.5_EYFP_GGGAGTAGTTAACAGT-1	E14.5_EYFP	19962	4899	NA	NA	9.06723	0.323068	-0.177761	S	E14.5_EYFP	18410	4873	NA	1	4	10x_4	10x	NA	16798	13267	11574	3505	4337	1973	849	504	0.822517	0.83	4.30978	0.09	0.80409	0.19591	4	4	1
E14.5_EYFP_GGGTCACTCATGCATA-1	E14.5_EYFP	5979	2091	NA	NA	0.150527	-0.133237	-0.14793	G1	E14.5_EYFP	16280	2992	NA	1	5	10x_5	10x	NA	5634	4256	869	536	4647	1607	281	222	0.724771	0.55	2.65117	0.01	0.831403	0.168597	5	5	1
E14.5_EYFP_GGTAACCGTTCCATTA-1	E14.5_EYFP	21705	4997	NA	NA	8.57406	0.112825	0.0490207	S	E14.5_EYFP	18413	4953	NA	1	4	10x_4	10x	NA	10874	8976	11882	3408	5442	2120	845	533	0.656701	0.32	5.38327	0.42	0.553901	0.446099	4	4	1
E14.5_EYFP_GGTAACTTCGCTAAAC-1	E14.5_EYFP	20481	4941	NA	NA	7.35316	-0.141704	-0.20704	G1	E14.5_EYFP	18340	4901	NA	3	0	10x_0	10x	NA	57585	32971	10341	3150	6123	2352	882	541	0.775559	0.71	4.50651	0.14	0.5	0.5	0	0	3
E14.5_EYFP_GGTACTAGTAACGAGG-1	E14.5_EYFP	19643	5146	NA	NA	9.28575	0.677608	0.380273	S	E14.5_EYFP	18434	5126	NA	1	5	10x_5	10x	NA	37207	23911	8158	3191	7814	2653	914	578	0.887086	0.92	5.2294	0.36	0.5	0.5	5	5	1
E14.5_EYFP_GGTCCTGCACAACAGG-1	E14.5_EYFP	21595	4882	NA	NA	6.24682	-0.261085	-0.149773	G1	E14.5_EYFP	18403	4861	NA	1	4	10x_4	10x	NA	45454	26536	13860	3504	3646	1792	812	494	0.655843	0.32	4.95603	0.27	0.512956	0.487044	4	4	1
E14.5_EYFP_GGTTACCCAGAAATTG-1	E14.5_EYFP	24668	5242	NA	NA	6.54289	-0.13347	-0.12551	G1	E14.5_EYFP	18103	5205	NA	1	4	10x_4	10x	NA	35460	22701	13847	3541	6354	2359	990	587	0.969265	0.97	5.267	0.37	0.496657	0.503343	4	4	1
E14.5_EYFP_GGTTGACGTACGGGTT-1	E14.5_EYFP	23791	5167	NA	NA	8.92775	-0.0204392	-0.181721	G1	E14.5_EYFP	18362	5125	NA	1	4	10x_4	10x	NA	7794	6916	13381	3550	5624	2237	928	534	0.720238	0.54	5.76122	0.57	0.628019	0.371981	4	4	1
E14.5_EYFP_GGTTTCCTCAGCACGC-1	E14.5_EYFP	8147	2638	NA	NA	14.4593	-0.0212871	0.894669	G2M	E14.5_EYFP	16630	2830	NA	5	5	10x_5	10x	NA	41695	22930	2587	1239	3606	1514	355	250	0.704846	0.49	5.566	0.49	0.568749	0.431251	5	5	5
E14.5_EYFP_GGTTTGTAGGGTCTAT-1	E14.5_EYFP	6704	2481	NA	NA	11.9928	-0.139713	-0.116414	G1	E14.5_EYFP	16521	3012	NA	6	6_1	10x_6_1	10x	NA	13386	8341	2352	1124	2964	1408	296	229	0.900901	0.93	7.81934	0.96	0.395255	0.604745	6	6_1	6
E14.5_EYFP_GTAGCGCTCGCTCCAT-1	E14.5_EYFP	14129	3849	NA	NA	4.06964	-0.156106	-0.223607	G1	E14.5_EYFP	16844	3833	NA	2	1	10x_1	10x	NA	32070	21297	2314	1339	10039	2847	761	530	0.782541	0.74	5.29671	0.38	0.5	0.5	1	1	2
E14.5_EYFP_GTATTCAAGGTCCAAT-1	E14.5_EYFP	16712	4250	NA	NA	4.51771	-0.0415233	-0.24071	G1	E14.5_EYFP	17136	4226	NA	4	2	10x_2	10x	NA	18290	12170	3162	1747	11351	3028	835	598	0.590145	0.15	6.63193	0.83	0.510497	0.489503	2	2	4
E14.5_EYFP_GTCAAACTCCGGTATG-1	E14.5_EYFP	23886	5928	NA	NA	6.03282	0.210235	-0.130602	S	E14.5_EYFP	18426	5894	NA	4	2	10x_2	10x	NA	70795	35537	11799	3840	7846	3125	1203	687	0.859138	0.9	5.02698	0.29	0.56582	0.43418	2	2	4
E14.5_EYFP_GTCCTCCCATAATGTC-1	E14.5_EYFP	21532	5115	NA	NA	7.70946	0.0133292	-0.175521	S	E14.5_EYFP	18471	5086	NA	1	4	10x_4	10x	NA	32615	20824	10698	3517	6842	2258	1001	604	0.737199	0.6	5.73799	0.56	0.5	0.5	4	4	1
E14.5_EYFP_GTCGGTTCACTTCATC-1	E14.5_EYFP	21865	4815	NA	NA	7.57375	-0.0113281	-0.160655	G1	E14.5_EYFP	18399	4798	NA	1	4	10x_4	10x	NA	34370	21486	12990	3409	4590	1894	862	516	0.870721	0.91	5.15436	0.33	0.509245	0.490755	4	4	1
E14.5_EYFP_GTCTAATCAGTCTAGC-1	E14.5_EYFP	15660	4373	NA	NA	2.67561	0.332261	0.480847	G2M	E14.5_EYFP	16925	4354	NA	0	1	10x_1	10x	NA	25290	17135	2622	1449	11149	3359	938	643	0.775833	0.71	5.08036	0.31	0.476392	0.523608	1	1	0
E14.5_EYFP_GTGAACAAGCTTAACA-1	E14.5_EYFP	14335	3997	NA	NA	7.80607	-0.170316	-0.0955519	G1	E14.5_EYFP	16983	3984	NA	1	4	10x_4	10x	NA	33120	20550	7722	2569	3922	1698	576	388	0.64742	0.28	4.74741	0.21	0.52983	0.47017	4	4	1
E14.5_EYFP_GTGATCAGTGTGCAAC-1	E14.5_EYFP	8653	3156	NA	NA	9.25691	-0.139393	-0.144001	G1	E14.5_EYFP	16724	3253	NA	5	1	10x_1	10x	NA	55129	29631	1829	1038	5307	2293	450	338	0.607406	0.19	5.95018	0.64	0.630122	0.369878	1	1	5
E14.5_EYFP_GTGCTGATCTGCAAAC-1	E14.5_EYFP	4565	2089	NA	NA	10.69	0.0307829	-0.0619162	S	E14.5_EYFP	16841	3436	NA	0	1	10x_1	10x	NA	25218	17910	2190	1160	1385	900	213	171	0.782879	0.74	5.00639	0.29	0.5	0.5	1	1	0
E14.5_EYFP_GTGTCCAAGTATTGGC-1	E14.5_EYFP	14509	4008	NA	NA	8.79454	-0.0465436	-0.180537	G1	E14.5_EYFP	16974	3997	NA	1	4	10x_4	10x	NA	36855	22477	8746	2758	2735	1460	606	387	0.704835	0.49	5.26766	0.37	0.556834	0.443166	4	4	1
E14.5_EYFP_GTTAACGGTTTGCGAA-1	E14.5_EYFP	14617	3977	NA	NA	5.39782	-0.0330619	-0.17384	G1	E14.5_EYFP	16914	3960	NA	3	0	10x_0	10x	NA	29827	20594	2069	1320	10436	3049	817	562	0.671311	0.38	4.58379	0.16	0.552901	0.447099	0	0	3
E14.5_EYFP_GTTACTAAGGCATTGT-1	E14.5_EYFP	5088	2133	NA	NA	14.2492	-0.136584	-0.0737214	G1	E14.5_EYFP	16291	3236	NA	0	1	10x_1	10x	NA	47105	28138	1310	753	2598	1405	257	201	0.770874	0.7	5.06271	0.3	0.493399	0.506601	1	1	0
E14.5_EYFP_GTTAGGCGTTAGCAGC-1	E14.5_EYFP	30622	5024	NA	NA	4.52289	-0.249812	-0.299721	G1	E14.5_EYFP	18497	4589	NA	2	1	10x_1	10x	NA	9942	8358	3964	1717	22785	3992	1532	903	0.705	0.49	6.98436	0.89	0.5528	0.4472	1	1	2
E14.5_EYFP_GTTGGCGGTCCTAAGA-1	E14.5_EYFP	8168	3271	NA	NA	4.41969	-0.102243	-0.0668824	G1	E14.5_EYFP	16794	3389	NA	2	1	10x_1	10x	NA	19441	14164	3966	1980	2974	1432	379	285	0.553377	0.08	5.56779	0.49	0.53962	0.46038	1	1	2
E14.5_EYFP_GTTGGCGGTTTATTCG-1	E14.5_EYFP	7947	3097	NA	NA	3.39751	-0.220517	-0.15751	G1	E14.5_EYFP	16612	3287	NA	0	1	10x_1	10x	NA	20996	13749	2922	1513	3768	1727	477	360	0.740629	0.61	6.0908	0.68	0.489027	0.510973	1	1	0
E14.5_EYFP_GTTTCTAGTTAAGTGT-1	E14.5_EYFP	25050	5812	NA	NA	6.89421	0.594027	0.0585588	S	E14.5_EYFP	18176	5782	NA	0	0	10x_0	10x	NA	19090	15035	12880	3927	7678	2737	1107	673	0.610418	0.2	4.33349	0.1	0.540594	0.459406	0	0	0
E14.5_EYFP_GTTTGCTGTCATCAAG-1	E14.5_EYFP	14076	3703	NA	NA	1.72634	-0.0196283	-0.219658	G1	E14.5_EYFP	16880	3683	NA	2	1	10x_1	10x	NA	36753	23466	2111	1210	10632	2782	653	475	0.680392	0.4	4.78241	0.22	0.542694	0.457306	1	1	2
E14.5_EYFP_GTTTGTAAGAAAGCAT-1	E14.5_EYFP	22459	5625	NA	NA	8.45541	0.665952	0.311452	S	E14.5_EYFP	18463	5582	NA	1	5	10x_5	10x	NA	45441	26686	11193	3748	7044	2578	943	603	0.670541	0.37	4.49995	0.14	0.468253	0.531747	5	5	1
E14.5_EYFP_GTTTGTTTCTAGCGAT-1	E14.5_EYFP	8544	2991	NA	NA	8.57912	-0.0380009	-0.109861	G1	E14.5_EYFP	16624	3115	NA	2	1	10x_1	10x	NA	43313	24853	2675	1195	4339	1985	446	334	0.62453	0.23	5.91895	0.62	0.5	0.5	1	1	2
E14.5_EYFP_TAACCTAAGTACCGCA-1	E14.5_EYFP	18015	4714	NA	NA	4.67388	0.103265	-0.0691028	S	E14.5_EYFP	17881	4692	NA	0	2	10x_2	10x	NA	36502	22740	8336	2895	6852	2326	814	504	0.691022	0.45	4.28223	0.09	0.5	0.5	2	2	0
E14.5_EYFP_TAAGCTATCTTTGTAC-1	E14.5_EYFP	14731	4518	NA	NA	4.70436	-0.166035	-0.213342	G1	E14.5_EYFP	16769	4457	NA	0	1	10x_1	10x	NA	31082	21339	5539	2366	6938	2678	844	535	0.766299	0.69	4.62401	0.17	0.534793	0.465207	1	1	0
E14.5_EYFP_TAAGGCTTCAAACTCA-1	E14.5_EYFP	15365	4192	NA	NA	7.88155	-0.163089	-0.216475	G1	E14.5_EYFP	16909	4167	NA	5	1	10x_1	10x	NA	12602	10238	6593	2491	6081	2141	659	436	0.705782	0.5	4.67926	0.19	0.515877	0.484123	1	1	5
E14.5_EYFP_TACAGCTAGCTTACTT-1	E14.5_EYFP	36873	6882	NA	NA	4.52906	0.79964	0.0911404	S	E14.5_EYFP	17481	5111	NA	0	0	10x_0	10x	NA	38080	26167	20247	4959	10461	3242	1587	878	0.728827	0.57	4.35438	0.1	0.5	0.5	0	0	0
E14.5_EYFP_TACCAAATCTCAATAG-1	E14.5_EYFP	31338	6484	NA	NA	8.93803	-0.150105	-0.242535	G1	E14.5_EYFP	18530	5933	NA	4	9	10x_9	10x	NA	53684	31893	15384	4360	9785	3403	1444	805	0.854245	0.89	5.18247	0.34	0.521794	0.478206	9	9	4
E14.5_EYFP_TACCGAAGTCAGGAAG-1	E14.5_EYFP	26720	5383	NA	NA	8.64521	0.101242	0.569917	G2M	E14.5_EYFP	18442	5287	NA	2	1	10x_1	10x	NA	6732	5862	4095	1994	17869	4199	1487	900	0.773946	0.71	6.01757	0.65	0.554333	0.445667	1	1	2
E14.5_EYFP_TACCTTTAGACAAACG-1	E14.5_EYFP	18140	5107	NA	NA	4.09041	-0.191653	-0.0960464	G1	E14.5_EYFP	17960	5055	NA	5	4	10x_4	10x	NA	10223	8513	8954	3390	6677	2319	900	556	0.708008	0.5	4.02462	0.06	0.525875	0.474125	4	4	5
E14.5_EYFP_TACCTTTAGCCTCTCG-1	E14.5_EYFP	39759	6775	NA	NA	4.27576	-0.0628072	-0.136335	G1	E14.5_EYFP	17218	4736	NA	0	0	10x_0	10x	NA	47925	28405	20076	4832	13482	3581	1820	952	0.6297	0.24	4.53255	0.15	0.530872	0.469128	0	0	0
E14.5_EYFP_TAGTTTGAGGTTAGCT-1	E14.5_EYFP	5766	2420	NA	NA	7.83906	-0.136756	-0.17268	G1	E14.5_EYFP	15999	3287	NA	2	1	10x_1	10x	NA	28575	19125	1148	624	3658	1792	322	226	0.845227	0.87	5.60096	0.51	0.558191	0.441809	1	1	2
E14.5_EYFP_TATCCAGCACCTACGG-1	E14.5_EYFP	24319	5466	NA	NA	8.35561	0.552975	0.0715091	S	E14.5_EYFP	18279	5417	NA	0	0	10x_0	10x	NA	51354	28546	11830	3470	7627	2730	978	639	0.587054	0.14	4.49086	0.13	0.5	0.5	0	0	0
E14.5_EYFP_TATGGTCAGGTTACAC-1	E14.5_EYFP	17881	5175	NA	NA	5.26257	0.522207	-0.130635	S	E14.5_EYFP	17814	5135	NA	0	1	10x_1	10x	NA	54015	29135	9341	3460	5778	2307	794	512	0.590972	0.15	4.67368	0.19	0.5	0.5	1	1	0
E14.5_EYFP_TCAAGACTCAAACTCA-1	E14.5_EYFP	7325	2860	NA	NA	0.846416	-0.148072	-0.107489	G1	E14.5_EYFP	16773	3239	NA	5	9	10x_9	10x	NA	21421	13053	3793	1623	2298	1333	450	313	0.566404	0.11	8.13915	0.97	0.548422	0.451578	9	9	5
E14.5_EYFP_TCAGCGATCAAAGGCA-1	E14.5_EYFP	18316	4732	NA	NA	4.27495	-0.179333	-0.196314	G1	E14.5_EYFP	18042	4713	NA	0	1	10x_1	10x	NA	64075	35322	8563	2962	6944	2331	814	509	0.648445	0.29	4.89777	0.25	0.476046	0.523954	1	1	0
E14.5_EYFP_TCAGGTTAGTCATTTC-1	E14.5_EYFP	15521	4304	NA	NA	4.98035	0.162707	-0.151431	S	E14.5_EYFP	16941	4278	NA	1	5	10x_5	10x	NA	34660	21097	4451	2085	8920	2769	756	530	0.842279	0.86	4.90794	0.25	0.589224	0.410776	5	5	1
E14.5_EYFP_TCATTGTTCGTGCTTC-1	E14.5_EYFP	18381	4784	NA	NA	7.05076	0.0273963	-0.0697476	S	E14.5_EYFP	18029	4753	NA	1	4	10x_4	10x	NA	40397	24606	9776	3211	5263	2053	780	499	0.658516	0.33	4.7653	0.21	0.5	0.5	4	4	1
E14.5_EYFP_TCGACAAGTTTATTCG-1	E14.5_EYFP	16570	4584	NA	NA	9.34822	-0.203251	0.00507469	G2M	E14.5_EYFP	17137	4565	NA	1	5	10x_5	10x	NA	40489	22597	6575	2660	6587	2378	712	482	0.536711	0.07	4.6965	0.2	0.475704	0.524296	5	5	1
E14.5_EYFP_TCGGTAAGTTGGATCA-1	E14.5_EYFP	33512	6232	NA	NA	10.6052	0.0399584	-0.142775	S	E14.5_EYFP	17968	5048	NA	1	4	10x_4	10x	NA	59924	30883	12900	3822	13764	3593	1395	851	0.668405	0.36	5.65007	0.53	0.471048	0.528952	4	4	1
E14.5_EYFP_TCGTAATCATTGACAT-1	E14.5_EYFP	7813	2596	NA	NA	4.47971	-0.187675	-0.133101	G1	E14.5_EYFP	16489	2918	NA	5	1	10x_1	10x	NA	21868	14929	1874	894	4862	1813	424	289	0.559801	0.09	5.68363	0.55	0.515152	0.484848	1	1	5
E14.5_EYFP_TCGTTATTCTGTTCAT-1	E14.5_EYFP	25897	5427	NA	NA	6.93903	-0.0167368	-0.0946502	G1	E14.5_EYFP	18179	5400	NA	1	4	10x_4	10x	NA	19036	14583	14923	3909	6329	2344	1106	606	0.653823	0.31	4.75094	0.21	0.5	0.5	4	4	1
E14.5_EYFP_TGAGCACGTGGGTGAA-1	E14.5_EYFP	10135	3882	NA	NA	4.32166	-0.279256	-0.168761	G1	E14.5_EYFP	17515	3866	NA	0	1	10x_1	10x	NA	17243	12625	5421	2498	2952	1521	510	371	0.90109	0.94	6.19816	0.72	0.554594	0.445406	1	1	0
E14.5_EYFP_TGAGGGAGTGAGCACT-1	E14.5_EYFP	12238	3711	NA	NA	8.90668	-0.182396	-0.190333	G1	E14.5_EYFP	17006	3699	NA	4	2	10x_2	10x	NA	37295	24008	7174	2531	2588	1376	471	318	0.805434	0.79	4.5487	0.15	0.562274	0.437726	2	2	4
E14.5_EYFP_TGCATGAGTTGCTTCG-1	E14.5_EYFP	29792	5972	NA	NA	4.95435	-0.100236	-0.326401	G1	E14.5_EYFP	18510	5659	NA	2	1	10x_1	10x	NA	62472	33271	10106	3457	15051	3605	1537	883	0.775305	0.71	4.80087	0.23	0.52297	0.47703	1	1	2
E14.5_EYFP_TGCCGGTAGCATTATG-1	E14.5_EYFP	29010	4777	NA	NA	6.62185	0.352399	0.511382	G2M	E14.5_EYFP	18498	4513	NA	1	5	10x_5	10x	NA	58027	29645	3679	1836	21094	3737	1421	817	0.766271	0.69	5.89508	0.62	0.558549	0.441451	5	5	1
E14.5_EYFP_TGCCTGTTCTTGAGCG-1	E14.5_EYFP	30617	5943	NA	NA	8.136	0.550534	0.146813	S	E14.5_EYFP	18540	5512	NA	1	5	10x_5	10x	NA	33505	20820	10230	3535	15006	3603	1451	906	0.84743	0.87	5.88476	0.61	0.524939	0.475061	5	5	1
E14.5_EYFP_TGCTGGATCGGTAACT-1	E14.5_EYFP	19950	5562	NA	NA	7.77945	0.382866	0.641714	G2M	E14.5_EYFP	18529	5532	NA	0	1	10x_1	10x	NA	45369	26759	8423	3504	7809	2889	1048	692	0.694021	0.45	6.22497	0.73	0.5	0.5	1	1	0
E14.5_EYFP_TGGCTAAGTTAGCCAA-1	E14.5_EYFP	13305	3925	NA	NA	8.56069	-0.135245	-0.136337	G1	E14.5_EYFP	17047	3909	NA	5	4	10x_4	10x	NA	3217	2969	7609	2680	3073	1474	526	347	0.919149	0.95	5.5157	0.47	0.78135	0.21865	4	4	5
E14.5_EYFP_TGGGCATGTGATGAAA-1	E14.5_EYFP	38418	7159	NA	NA	7.94419	0.0195497	-0.135973	S	E14.5_EYFP	17284	5042	NA	4	9	10x_9	10x	NA	88279	41086	21614	5299	9178	3467	1653	858	0.872359	0.91	5.05019	0.3	0.471739	0.528261	9	9	4
E14.5_EYFP_TGGTCAGTCAGCCAAT-1	E14.5_EYFP	11750	3441	NA	NA	10.366	0.270874	0.0815753	S	E14.5_EYFP	16794	3431	NA	0	0	10x_0	10x	NA	5110	4582	2542	1373	6975	2360	587	430	0.589912	0.14	5.42929	0.44	0.571187	0.428813	0	0	0
E14.5_EYFP_TGGTGCATCAATAGCC-1	E14.5_EYFP	21661	5641	NA	NA	8.79922	0.721523	0.191483	S	E14.5_EYFP	18567	5575	NA	0	0	10x_0	10x	NA	42879	28140	10798	3559	6417	2817	1032	633	0.740299	0.61	4.52681	0.15	0.5	0.5	0	0	0
E14.5_EYFP_TGGTGCATCCCGCCTA-1	E14.5_EYFP	15579	4226	NA	NA	4.4162	-0.146157	-0.181385	G1	E14.5_EYFP	17009	4204	NA	4	2	10x_2	10x	NA	26036	17317	6993	2560	6282	2165	703	450	0.651515	0.3	4.99305	0.28	0.5	0.5	2	2	4
E14.5_EYFP_TGTAAGTGTGATGAAA-1	E14.5_EYFP	16775	4745	NA	NA	7.83905	0.439653	-0.108963	S	E14.5_EYFP	17164	4729	NA	0	0	10x_0	10x	NA	25780	18370	9372	3202	3954	1950	772	482	0.736796	0.59	4.46423	0.13	0.5	0.5	0	0	0
E14.5_EYFP_TGTAATGTCTATCGCC-1	E14.5_EYFP	19917	4473	NA	NA	6.39655	-0.226419	-0.296414	G1	E14.5_EYFP	18401	4452	NA	0	1	10x_1	10x	NA	37843	24362	4220	1883	12508	3082	921	648	0.979111	0.97	4.6078	0.16	0.5	0.5	1	1	0
E14.5_EYFP_TGTATCCGTAGCAGCT-1	E14.5_EYFP	13630	3995	NA	NA	8.34923	-0.173298	-0.172464	G1	E14.5_EYFP	16975	3976	NA	5	0	10x_0	10x	NA	8570	7464	7907	2675	2833	1502	585	408	0.733513	0.58	4.41717	0.12	0.689598	0.310402	0	0	5
E14.5_EYFP_TGTCAGTAGCGGGCAA-1	E14.5_EYFP	20589	5407	NA	NA	7.42144	0.0345054	0.986225	G2M	E14.5_EYFP	18452	5379	NA	0	0	10x_0	10x	NA	45853	28477	11553	3756	4977	2180	844	537	0.904313	0.94	4.79579	0.22	0.502507	0.497493	0	0	0
E14.5_EYFP_TGTGATCAGATAGACG-1	E14.5_EYFP	16176	4580	NA	NA	5.5638	-0.121072	-0.138093	G1	E14.5_EYFP	17029	4550	NA	1	4	10x_4	10x	NA	38343	23744	8953	3096	4383	1874	777	496	0.871197	0.91	4.69299	0.19	0.5	0.5	4	4	1
E14.5_EYFP_TGTGATCAGTTAGACC-1	E14.5_EYFP	37418	5494	NA	NA	5.39847	0.257533	0.430762	G2M	E14.5_EYFP	17884	3947	NA	1	5	10x_5	10x	NA	66115	32905	4257	2167	27843	4336	2021	1083	0.767697	0.7	5.21706	0.35	0.532009	0.467991	5	5	1
E14.5_EYFP_TGTGGAGCAAACGGGC-1	E14.5_EYFP	9175	3210	NA	NA	12.6757	-0.233666	0.0854471	G2M	E14.5_EYFP	17110	3234	NA	5	4	10x_4	10x	NA	8874	7529	4537	1819	2427	1409	398	299	0.608284	0.19	4.23876	0.09	0.5	0.5	4	4	5
E14.5_EYFP_TGTGGAGCAGTAAAGC-1	E14.5_EYFP	19042	4736	NA	NA	8.61779	-0.120641	0.469004	G2M	E14.5_EYFP	18226	4699	NA	1	4	10x_4	10x	NA	33865	20993	10776	3187	4281	1911	763	461	0.827369	0.83	5.44057	0.45	0.554662	0.445338	4	4	1
E14.5_EYFP_TGTGTGAGTCCTTCAG-1	E14.5_EYFP	16148	4719	NA	NA	5.35051	0.393426	-0.0498602	S	E14.5_EYFP	16968	4687	NA	0	1	10x_1	10x	NA	22593	16660	6623	2859	7093	2476	880	598	0.56188	0.1	4.71848	0.2	0.5	0.5	1	1	0
E14.5_EYFP_TGTTGTGCAACTAGCC-1	E14.5_EYFP	14917	4447	NA	NA	8.60093	-0.121886	-0.206706	G1	E14.5_EYFP	16866	4417	NA	0	1	10x_1	10x	NA	58801	32602	7585	2882	4476	1917	623	420	0.681408	0.41	4.08288	0.06	0.5	0.5	1	1	0
E14.5_EYFP_TGTTGTGCATGTTGTG-1	E14.5_EYFP	26269	6264	NA	NA	6.02231	0.737771	0.0796628	S	E14.5_EYFP	18298	6209	NA	3	0	10x_0	10x	NA	49615	29880	14028	4474	7583	2865	1200	694	0.932795	0.96	4.21043	0.08	0.502811	0.497189	0	0	3
E14.5_EYFP_TTAAAGGCAACAGGAT-1	E14.5_EYFP	13290	3522	NA	NA	7.96087	-0.243372	-0.163339	G1	E14.5_EYFP	17002	3507	NA	1	5	10x_5	10x	NA	25503	16378	2341	1204	8758	2562	637	427	0.848502	0.88	6.22995	0.73	0.575017	0.424983	5	5	1
E14.5_EYFP_TTAGCAGGTTATTGCC-1	E14.5_EYFP	17901	4664	NA	NA	12.5021	-0.0684324	0.417512	G2M	E14.5_EYFP	17815	4632	NA	1	6_1	10x_6_1	10x	NA	53475	29399	8517	2804	5244	2327	720	484	0.717609	0.53	5.05541	0.3	0.524777	0.475223	6	6_1	1
E14.5_EYFP_TTATTGCTCCCTGACT-1	E14.5_EYFP	16928	4172	NA	NA	8.5716	0.417845	0.296258	S	E14.5_EYFP	17177	4134	NA	2	1	10x_1	10x	NA	25799	18867	3380	1707	10628	3010	886	583	0.610493	0.2	5.15022	0.33	0.658186	0.341814	1	1	2
E14.5_EYFP_TTCAACCGTTTGCGAA-1	E14.5_EYFP	36027	6409	NA	NA	5.70683	0.196018	0.988549	G2M	E14.5_EYFP	17627	4773	NA	3	0	10x_0	10x	NA	13312	10824	21022	4679	8220	2846	1436	751	0.643255	0.27	4.51116	0.14	0.587829	0.412171	0	0	3
E14.5_EYFP_TTCCTCAAGCATGTCG-1	E14.5_EYFP	9873	3165	NA	NA	9.68297	-0.164088	-0.168216	G1	E14.5_EYFP	17389	3150	NA	0	0	10x_0	10x	NA	26747	17377	4087	1582	3656	1689	450	328	0.74092	0.62	4.9121	0.26	0.5	0.5	0	0	0
E14.5_EYFP_TTCTTAGGTTAGCCAA-1	E14.5_EYFP	20404	5224	NA	NA	4.86669	-0.195535	-0.247629	G1	E14.5_EYFP	18427	5200	NA	0	2	10x_2	10x	NA	19615	15032	9911	3442	7058	2530	999	612	0.858422	0.89	4.64413	0.18	0.582893	0.417107	2	2	0
E14.5_EYFP_TTGCACACACTAAATC-1	E14.5_EYFP	31380	6187	NA	NA	11.6284	0.597598	0.564255	S	E14.5_EYFP	18518	5589	NA	1	5	10x_5	10x	NA	91465	39762	8929	3283	16246	4131	1342	850	0.711949	0.52	5.18547	0.34	0.500746	0.499254	5	5	1
E14.5_EYFP_TTGCGAGTCGTAATCA-1	E14.5_EYFP	13761	4174	NA	NA	9.14178	-0.135737	-0.220447	G1	E14.5_EYFP	16897	4160	NA	1	4	10x_4	10x	NA	48514	27478	8111	2896	2748	1458	592	386	0.700619	0.48	6.07757	0.67	0.699166	0.300834	4	4	1
E14.5_EYFP_TTGTGCCTCTGTGCAG-1	E14.5_EYFP	19636	5167	NA	NA	8.34182	0.580609	0.893906	G2M	E14.5_EYFP	18409	5111	NA	3	0	10x_0	10x	NA	36993	23978	8925	2965	6695	2799	908	564	0.814282	0.81	4.53228	0.15	0.5	0.5	0	0	3
E14.5_EYFP_TTTAAGGTCTGTGCAG-1	E14.5_EYFP	12609	3891	NA	NA	10.897	-0.0401539	-0.198228	G1	E14.5_EYFP	16904	3855	NA	0	1	10x_1	10x	NA	26515	17378	5149	2140	4707	2012	574	399	0.675097	0.39	4.39853	0.11	0.5	0.5	1	1	0
E14.5_EYFP_TTTCCGGGTCCTTTAA-1	E14.5_EYFP	4985	2111	NA	NA	7.02106	-0.0368024	-0.133698	G1	E14.5_EYFP	16209	3256	NA	2	1	10x_1	10x	NA	16310	12364	1205	724	2949	1434	271	203	0.6899	0.44	5.87291	0.61	0.424501	0.575499	1	1	2
E14.5_EYFP_TTTGACTTCATAACTG-1	E14.5_EYFP	23980	5194	NA	NA	6.46789	-0.058776	-0.122158	G1	E14.5_EYFP	18289	5162	NA	1	4	10x_4	10x	NA	29605	19892	11939	3430	7850	2494	997	594	0.710916	0.51	5.33675	0.4	0.5	0.5	4	4	1
E14.5_EYFP_TTTGTGTTCGAGGAGT-1	E14.5_EYFP	26400	5827	NA	NA	8.39773	0.213055	1.18483	G2M	E14.5_EYFP	18212	5781	NA	1	4	10x_4	10x	NA	72331	35175	13624	3919	7509	2785	1110	679	0.797829	0.78	5.20227	0.35	0.535968	0.464032	4	4	1

## Sheet: intC_DEGs
p_val	avg_log2FC	pct.1	pct.2	p_val_adj	cluster	gene
5.07041e-43	0.648844	0.564	0.086	1.01408e-39	0	Stc2
3.30458e-37	0.287834	0.619	0.078	6.60916e-34	0	Efcab1
8.2173e-36	0.760163	0.485	0.067	1.64346e-32	0	Erbb3
1.81905e-35	1.62488	0.579	0.175	3.6381e-32	0	Bmp2
1.93925e-35	0.985317	0.55	0.095	3.87851e-32	0	Gm3716
3.03703e-34	0.749262	0.847	0.251	6.07406e-31	0	Piezo2
8.03909e-34	1.01264	0.832	0.306	1.60782e-30	0	Gata4
1.5801e-33	0.605456	0.55	0.074	3.1602e-30	0	Kcnrg
1.08462e-32	0.380144	0.599	0.133	2.16925e-29	0	1810034E14Rik
1.75799e-32	0.758383	0.792	0.202	3.51598e-29	0	2022-03-01
5.77718e-32	0.846464	0.748	0.241	1.15544e-28	0	Has2
7.15863e-32	0.665318	0.55	0.143	1.43173e-28	0	Bcl11b
1.95062e-31	0.90867	0.792	0.257	3.90124e-28	0	Ank3
4.09861e-31	0.568769	0.886	0.302	8.19721e-28	0	Dlg2
1.0879e-30	0.87575	0.653	0.175	2.1758e-27	0	Sgcz
1.43042e-30	1.33431	0.748	0.298	2.86085e-27	0	Col18a1
1.21937e-29	0.684562	0.762	0.291	2.43873e-26	0	Sipa1l1
5.43015e-29	0.304872	0.441	0.112	1.08603e-25	0	Thsd1
8.26861e-29	0.785671	0.743	0.304	1.65372e-25	0	Tbx20
1.04482e-28	0.908069	0.535	0.12	2.08964e-25	0	Arntl2
9.79387e-28	1.24721	0.668	0.287	1.95877e-24	0	Thbs1
1.02273e-27	0.540994	0.663	0.213	2.04547e-24	0	Strip2
1.20028e-27	0.543737	0.559	0.144	2.40055e-24	0	Klhl6
1.21074e-27	1.30852	0.609	0.238	2.42149e-24	0	Vegfc
1.43918e-27	0.60258	0.48	0.072	2.87836e-24	0	Frmd5
1.57572e-27	0.473021	0.767	0.291	3.15145e-24	0	Rasgef1b
2.44492e-27	0.947293	0.554	0.165	4.88984e-24	0	Npr3
5.66137e-27	0.68607	0.584	0.127	1.13227e-23	0	Grik3
5.88307e-27	0.399281	0.525	0.091	1.17661e-23	0	Vwc2
1.13294e-26	0.348431	0.545	0.146	2.26588e-23	0	Mir17hg
2.02351e-26	0.660174	0.668	0.19	4.04701e-23	0	Ppp1r14c
3.63393e-26	0.687458	0.827	0.278	7.26787e-23	0	Gpr137c
5.25641e-26	0.754389	0.663	0.259	1.05128e-22	0	Edil3
6.92762e-26	0.716116	0.693	0.238	1.38552e-22	0	Tox3
6.98574e-26	0.879122	0.599	0.209	1.39715e-22	0	Ptprb
9.83461e-26	0.306769	0.411	0.082	1.96692e-22	0	Fgf1
1.96741e-25	0.337571	0.748	0.257	3.93482e-22	0	Chst11
3.2562e-25	1.55211	0.342	0.087	6.5124e-22	0	Car3
1.27846e-24	0.658023	0.49	0.135	2.55693e-21	0	4931428F04Rik
1.54138e-24	0.477183	0.767	0.306	3.08277e-21	0	Smad6
2.8699e-24	0.421176	0.307	0.103	5.7398e-21	0	Zfp658
3.5906e-24	0.439821	0.52	0.228	7.18119e-21	0	Tnfrsf19
4.66435e-24	0.798097	0.728	0.289	9.3287e-21	0	Dleu2
6.91146e-24	0.28809	0.327	0.103	1.38229e-20	0	Lrrtm1
7.07954e-24	0.457655	0.554	0.129	1.41591e-20	0	Ntn4
8.2421e-24	0.396407	0.668	0.247	1.64842e-20	0	Rspo3
8.68172e-24	0.352689	0.842	0.319	1.73634e-20	0	2610307P16Rik
1.25813e-23	0.261513	0.376	0.086	2.51626e-20	0	Slc13a4
4.35978e-23	0.360993	0.381	0.125	8.71956e-20	0	Hs3st3a1
6.45619e-23	0.730588	0.584	0.23	1.29124e-19	0	Iqgap2
1.18753e-22	1.09468	0.688	0.356	2.37506e-19	0	Sox9
1.28869e-22	0.467176	0.421	0.118	2.57738e-19	0	Gm13986
1.43695e-22	0.778991	0.421	0.12	2.8739e-19	0	Mybpc3
3.51255e-22	0.344648	0.426	0.124	7.0251e-19	0	Adamtsl2
3.58041e-22	0.326604	0.337	0.084	7.16081e-19	0	9430060I03Rik
3.91231e-22	0.416295	0.738	0.327	7.82462e-19	0	Sox5
4.05782e-22	0.87076	0.406	0.095	8.11563e-19	0	Nol3
4.79619e-22	0.491092	0.639	0.257	9.59238e-19	0	Kif26b
5.00303e-22	0.376688	0.718	0.325	1.00061e-18	0	Sox6
5.25866e-22	0.672458	0.366	0.089	1.05173e-18	0	Tspyl3
6.61787e-22	0.603066	0.728	0.319	1.32357e-18	0	Hecw2
6.71975e-22	0.512009	0.495	0.169	1.34395e-18	0	Neil2
8.51626e-22	0.633344	0.431	0.16	1.70325e-18	0	Syt14
9.19061e-22	0.370064	0.361	0.125	1.83812e-18	0	Pcdhb21
1.15068e-21	0.576081	0.416	0.061	2.30136e-18	0	4732491K20Rik
1.32451e-21	0.649394	0.634	0.289	2.64901e-18	0	Tox
1.38614e-21	0.447294	0.416	0.139	2.77228e-18	0	4931414P19Rik
1.429e-21	1.09402	0.579	0.281	2.85801e-18	0	Meox1
1.7938e-21	0.858535	0.376	0.057	3.5876e-18	0	Spin2c
1.82824e-21	0.366092	0.431	0.158	3.65647e-18	0	Il15
2.15925e-21	0.871549	0.639	0.3	4.3185e-18	0	Epha7
3.30581e-21	1.1097	0.48	0.07	6.61163e-18	0	Npas4
3.40047e-21	0.344554	0.465	0.118	6.80093e-18	0	Bbs12
6.71187e-21	0.753436	0.614	0.205	1.34237e-17	0	D230025D16Rik
6.78772e-21	0.599989	0.559	0.213	1.35754e-17	0	Arhgap18
1.26785e-20	0.771993	0.614	0.331	2.5357e-17	0	C430049B03Rik
2.35795e-20	1.00569	0.668	0.344	4.7159e-17	0	Robo2
2.38413e-20	0.384462	0.653	0.304	4.76825e-17	0	Bach2
5.20273e-20	0.819819	0.639	0.302	1.04055e-16	0	Tnc
8.28778e-20	0.591544	0.644	0.325	1.65756e-16	0	Cdh2
2.72099e-19	0.450662	0.495	0.124	5.44198e-16	0	Dpy19l2
3.95805e-19	0.484074	0.446	0.205	7.9161e-16	0	Slc44a5
4.49898e-19	0.946949	0.579	0.268	8.99796e-16	0	Igf1
8.39183e-19	0.43771	0.376	0.156	1.67837e-15	0	Has2os
1.3732e-18	0.256632	0.416	0.086	2.7464e-15	0	Rnf207
1.41728e-18	0.267885	0.525	0.188	2.83455e-15	0	Malt1
1.75472e-18	0.414894	0.426	0.184	3.50943e-15	0	Kif6
6.22345e-18	1.54877	0.49	0.124	1.24469e-14	0	Stmn4
8.39033e-18	0.370069	0.609	0.281	1.67807e-14	0	Epha3
9.72123e-18	0.344255	0.634	0.327	1.94425e-14	0	Fbxl7
2.00063e-17	0.390659	0.52	0.177	4.00127e-14	0	Zfp930
2.14815e-17	0.339573	0.431	0.093	4.29629e-14	0	Pde8a
2.80541e-17	0.426089	0.272	0.171	5.61082e-14	0	Edn1
2.8244e-17	0.510797	0.317	0.101	5.6488e-14	0	Noxred1
3.30327e-17	0.333048	0.356	0.087	6.60654e-14	0	Gm11549
3.45694e-17	0.479473	0.366	0.099	6.91387e-14	0	Cntn3
3.74741e-17	0.304266	0.386	0.209	7.49481e-14	0	E130114P18Rik
5.56413e-17	0.839408	0.366	0.068	1.11283e-13	0	2500002B13Rik
8.27344e-17	0.270815	0.535	0.217	1.65469e-13	0	Zfp760
9.7028e-17	0.888792	0.604	0.276	1.94056e-13	0	Tgfbi
1.01133e-16	0.514894	0.371	0.124	2.02266e-13	0	Clcf1
1.16415e-16	0.729329	0.421	0.19	2.32831e-13	0	Chrm3
1.33748e-16	0.583936	0.396	0.089	2.67495e-13	0	BC030867
2.59755e-16	0.282615	0.52	0.184	5.1951e-13	0	Sorbs2os
2.65764e-16	0.454411	0.356	0.167	5.31528e-13	0	Rtn4ip1
3.1805e-16	0.352915	0.327	0.202	6.36101e-13	0	Mok
3.2223e-16	0.371021	0.53	0.26	6.44459e-13	0	Mllt3
3.74311e-16	0.355455	0.356	0.16	7.48622e-13	0	Adgrv1
4.7755e-16	0.75662	0.554	0.243	9.55099e-13	0	Hmga2
5.09524e-16	0.845824	0.644	0.317	1.01905e-12	0	Vcan
8.7328e-16	0.283435	0.347	0.15	1.74656e-12	0	Lix1
1.01548e-15	0.458534	0.337	0.099	2.03097e-12	0	Dusp27
3.82764e-15	0.425949	0.327	0.158	7.65528e-12	0	Zfp14
4.46402e-15	0.67156	0.48	0.122	8.92804e-12	0	Ddx43
8.75519e-15	0.322867	0.658	0.287	1.75104e-11	0	Uty
8.86413e-15	0.298398	0.446	0.131	1.77283e-11	0	Wdr78
9.89511e-15	0.57803	0.535	0.224	1.97902e-11	0	E130102H24Rik
1.18936e-14	0.281599	0.262	0.135	2.37872e-11	0	Tmem200a
1.35381e-14	0.34276	0.297	0.171	2.70761e-11	0	Zfp442
2.28054e-14	0.254597	0.495	0.291	4.56109e-11	0	Rtn1
4.13765e-14	0.308992	0.426	0.154	8.2753e-11	0	Rapgef3
5.51153e-14	0.683846	0.48	0.3	1.10231e-10	0	Pbx3
6.12333e-14	0.3627	0.381	0.089	1.22467e-10	0	Lpar3
7.97208e-14	0.858817	0.45	0.264	1.59442e-10	0	Stk38l
1.12008e-13	0.331735	0.282	0.103	2.24015e-10	0	Cox7a1
1.29173e-13	0.754093	0.49	0.306	2.58345e-10	0	Flrt2
1.77014e-13	0.541859	0.361	0.099	3.54029e-10	0	Smc2os
1.79383e-13	0.404519	0.292	0.16	3.58766e-10	0	St6galnac5
1.90279e-13	0.476344	0.604	0.327	3.80557e-10	0	Unc5c
2.17227e-13	0.290298	0.277	0.122	4.34454e-10	0	Tmem229b
2.19794e-13	0.345985	0.406	0.19	4.39589e-10	0	Rapgefl1
3.21672e-13	0.764421	0.396	0.175	6.43343e-10	0	Col2a1
3.72158e-13	0.748644	0.703	0.357	7.44316e-10	0	Hist1h2ae
4.65488e-13	0.254067	0.594	0.314	9.30977e-10	0	Mamld1
5.86691e-13	0.555662	0.351	0.133	1.17338e-09	0	Stag3
6.68091e-13	0.387302	0.535	0.26	1.33618e-09	0	Cyp7b1
1.05577e-12	0.336151	0.366	0.097	2.11154e-09	0	Steap1
1.20537e-12	0.503685	0.292	0.148	2.41073e-09	0	Tex15
1.67145e-12	0.399407	0.609	0.325	3.3429e-09	0	Plcb4
2.14935e-12	0.335653	0.46	0.255	4.2987e-09	0	Papss2
2.48815e-12	0.860872	0.579	0.317	4.97629e-09	0	Pdgfra
2.89535e-12	0.422672	0.545	0.342	5.79069e-09	0	Palld
3.2475e-12	0.390778	0.465	0.266	6.49501e-09	0	Fibin
3.34892e-12	0.264163	0.262	0.127	6.69784e-09	0	Aasdh
6.74949e-12	0.303311	0.322	0.16	1.3499e-08	0	Zfp189
7.10244e-12	0.277983	0.525	0.316	1.42049e-08	0	Tmtc2
1.26203e-11	0.307943	0.381	0.146	2.52406e-08	0	Egfl8
2.17437e-11	0.267028	0.441	0.188	4.34874e-08	0	Prx
3.02393e-11	0.465854	0.307	0.137	6.04785e-08	0	Zfp354a
3.2242e-11	0.397745	0.312	0.131	6.44841e-08	0	Dand5
3.2458e-11	0.963917	0.525	0.283	6.4916e-08	0	Ankrd52
3.6545e-11	0.701409	0.396	0.11	7.30901e-08	0	Notum
4.43643e-11	0.423551	0.342	0.084	8.87287e-08	0	Dusp14
5.31083e-11	0.672103	0.421	0.266	1.06217e-07	0	Sema3d
5.36721e-11	0.290726	0.342	0.135	1.07344e-07	0	Cd109
6.57389e-11	0.512827	0.386	0.2	1.31478e-07	0	5730480H06Rik
1.80633e-10	0.397334	0.282	0.095	3.61267e-07	0	Angel1
2.15872e-10	0.464962	0.376	0.139	4.31743e-07	0	4933400F21Rik
4.14545e-10	0.350722	0.312	0.11	8.2909e-07	0	Prox2
4.99942e-10	0.394654	0.54	0.335	9.99884e-07	0	Hist1h1e
5.3227e-10	0.517452	0.257	0.116	1.06454e-06	0	Rragb
1.34374e-09	0.500388	0.406	0.173	2.68748e-06	0	Ybx2
2.13882e-09	0.923176	0.45	0.312	4.27764e-06	0	Irs1
2.82876e-09	0.751618	0.441	0.319	5.65751e-06	0	Kitl
4.75767e-09	0.468611	0.381	0.278	9.51534e-06	0	Vcam1
5.88443e-09	0.258855	0.381	0.249	1.17689e-05	0	Ackr3
8.40234e-09	0.445162	0.317	0.278	1.68047e-05	0	Pappa
1.00266e-08	0.684454	0.361	0.122	2.00533e-05	0	Tmc7
1.10012e-08	0.714797	0.416	0.202	2.20023e-05	0	Hapln1
1.30955e-08	0.626448	0.327	0.205	2.6191e-05	0	Raver2
1.89806e-08	0.294382	0.252	0.15	3.79612e-05	0	Zfp287
2.0024e-08	0.59922	0.505	0.314	4.00481e-05	0	Dbi
3.06301e-08	0.315058	0.238	0.26	6.12602e-05	0	4933407K13Rik
1.1879e-07	0.269874	0.292	0.171	0.000237579	0	Ccdc39
1.42284e-07	1.0507	0.267	0.124	0.000284569	0	Pcdhb11
1.81835e-07	0.342316	0.55	0.314	0.000363669	0	Kif20b
1.95022e-07	0.263123	0.376	0.316	0.000390044	0	Thsd7b
3.52395e-07	0.695029	0.51	0.331	0.00070479	0	Usp9x
4.01952e-07	0.2707	0.257	0.183	0.000803903	0	Zfp932
5.65927e-07	0.474522	0.396	0.295	0.00113185	0	Pcsk5
5.70569e-07	0.628258	0.262	0.143	0.00114114	0	Angptl4
7.40073e-07	0.41537	0.396	0.156	0.00148015	0	Zfp958
7.55192e-07	0.272996	0.302	0.274	0.00151038	0	Mtcl1
1.01076e-06	0.351613	0.307	0.19	0.00202152	0	Epha6
1.91491e-06	0.487547	0.292	0.097	0.00382982	0	Akr1c13
4.24816e-06	0.274039	0.441	0.319	0.00849633	0	S100pbp
5.66724e-06	0.330292	0.48	0.319	0.0113345	0	Ltbp1
5.90448e-06	0.404401	0.337	0.084	0.011809	0	Tmem200b
7.01694e-06	0.53734	0.48	0.359	0.0140339	0	Tmsb4x
7.5547e-06	0.57937	0.535	0.352	0.0151094	0	Id2
8.87986e-06	0.280368	0.475	0.357	0.0177597	0	Loxl2
1.20508e-05	0.970412	0.267	0.139	0.0241015	0	Crabp1
2.54286e-05	0.477447	0.292	0.169	0.0508572	0	Tubd1
2.61927e-05	0.671115	0.302	0.099	0.0523853	0	Gpr171
3.02468e-05	0.337161	0.386	0.289	0.0604935	0	Plk2
3.21287e-05	0.274591	0.317	0.072	0.0642575	0	AI504432
6.05593e-05	0.290786	0.287	0.07	0.121119	0	Pln
6.64709e-05	0.309401	0.302	0.065	0.132942	0	Plcd4
7.2565e-05	0.469589	0.262	0.188	0.14513	0	Traf3ip1
7.35298e-05	0.909874	0.396	0.163	0.14706	0	Asb4
9.02676e-05	0.332244	0.554	0.401	0.180535	0	Ccnf
0.000103305	0.619323	0.45	0.337	0.206609	0	Slc12a2
0.000396759	0.464797	0.257	0.101	0.793518	0	Map4k1
0.000508755	1.30958	0.525	0.395	1	0	H2afz
0.00182129	0.510802	0.272	0.238	1	0	Lrp3
0.0021811	0.351501	0.356	0.327	1	0	Tspan18
0.00266303	0.366569	0.48	0.291	1	0	Cthrc1
0.00282953	0.366743	0.252	0.276	1	0	Pttg1
0.0029882	0.423482	0.307	0.146	1	0	Zfp599
0.00518723	0.90276	0.312	0.241	1	0	Stk17b
0.00665373	0.810506	0.257	0.091	1	0	Ube2ql1
1.71051e-66	3.8096	0.959	0.158	3.42103e-63	1	Eln
9.45257e-65	3.81191	0.966	0.129	1.89051e-61	1	Pcdh7
6.08991e-56	2.92015	0.918	0.189	1.21798e-52	1	Slit3
7.5307e-55	3.27413	0.89	0.165	1.50614e-51	1	Prdm6
6.54163e-54	2.98123	0.904	0.246	1.30833e-50	1	Fbln5
4.48819e-53	3.93476	0.856	0.07	8.97638e-50	1	Lmod1
1.48388e-51	3.52423	0.815	0.141	2.96777e-48	1	Jag1
6.94939e-51	3.07412	0.849	0.153	1.38988e-47	1	Mtus2
9.24131e-51	3.41457	0.87	0.162	1.84826e-47	1	Spon1
3.9218e-47	4.15466	0.829	0.064	7.8436e-44	1	Prdm16
8.74496e-47	3.23536	0.836	0.201	1.74899e-43	1	Acta2
5.20485e-46	2.52433	0.87	0.247	1.04097e-42	1	Gpc6
1.32434e-44	3.33305	0.774	0.127	2.64868e-41	1	Cav1
1.71784e-44	3.19598	0.836	0.153	3.43567e-41	1	Efnb2
5.63731e-43	3.49919	0.801	0.156	1.12746e-39	1	Rgs5
2.80052e-41	2.80805	0.808	0.163	5.60104e-38	1	Col24a1
3.7486e-41	3.08489	0.767	0.136	7.4972e-38	1	Myocd
2.2915e-40	3.93671	0.774	0.089	4.58301e-37	1	Map3k7cl
5.40131e-40	3.45249	0.747	0.211	1.08026e-36	1	Myl9
8.23154e-40	2.80003	0.795	0.194	1.64631e-36	1	Ror1
9.14448e-40	3.8956	0.712	0.105	1.8289e-36	1	Myom1
2.62402e-39	2.91292	0.795	0.194	5.24804e-36	1	Lox
1.40331e-36	3.22933	0.726	0.119	2.80661e-33	1	Atp10a
8.14191e-36	2.69479	0.76	0.151	1.62838e-32	1	Ntrk3
2.22186e-35	3.33337	0.76	0.151	4.44372e-32	1	Rcan2
3.44734e-35	2.75254	0.753	0.201	6.89469e-32	1	Rbpms
5.16974e-35	2.75702	0.788	0.265	1.03395e-31	1	Tagln
9.22944e-34	2.7132	0.76	0.223	1.84589e-30	1	Pls3
4.18204e-33	3.21149	0.747	0.199	8.36408e-30	1	Tm4sf1
1.68853e-32	3.65601	0.692	0.143	3.37707e-29	1	Clca3a2
1.8562e-32	3.23153	0.747	0.052	3.71239e-29	1	Lgr6
4.58741e-31	2.48575	0.753	0.186	9.17481e-28	1	Cacna1c
1.32363e-30	2.62111	0.699	0.168	2.64726e-27	1	Gpc4
6.02813e-30	3.25318	0.705	0.239	1.20563e-26	1	Tpm2
9.8215e-30	2.78818	0.712	0.17	1.9643e-26	1	Itga4
4.11928e-29	2.56217	0.705	0.284	8.23856e-26	1	Fos
6.69663e-29	2.07106	0.719	0.199	1.33933e-25	1	Synpo2
9.32554e-29	2.95502	0.726	0.155	1.86511e-25	1	Schip1
1.07599e-28	2.11578	0.767	0.241	2.15197e-25	1	Alcam
1.98984e-28	2.66339	0.678	0.146	3.97968e-25	1	Skap2
1.41893e-26	3.54771	0.671	0.065	2.83785e-23	1	Lama5
5.50709e-26	3.46631	0.692	0.095	1.10142e-22	1	Cobll1
5.50709e-26	3.1826	0.705	0.146	1.10142e-22	1	Olfml2a
8.86858e-26	4.57318	0.637	0.041	1.77372e-22	1	Myh11
2.65039e-25	2.66064	0.692	0.151	5.30079e-22	1	Astn2
5.53365e-25	3.5478	0.699	0.124	1.10673e-21	1	Kcnab1
7.38428e-25	1.52369	0.692	0.261	1.47686e-21	1	Col4a1
2.73451e-24	3.52751	0.658	0.119	5.46901e-21	1	Adcy5
3.00654e-24	3.59806	0.678	0.091	6.01308e-21	1	Zdhhc14
6.06572e-24	3.11091	0.658	0.208	1.21314e-20	1	Btg2
8.75574e-24	2.50259	0.719	0.191	1.75115e-20	1	Pawr
9.61672e-24	2.48698	0.685	0.227	1.92334e-20	1	Specc1
1.27921e-23	1.96354	0.644	0.244	2.55843e-20	1	Itga9
3.90432e-23	1.54075	0.678	0.284	7.80865e-20	1	Fhl1
1.1927e-22	1.86238	0.664	0.223	2.3854e-19	1	Dnajb4
1.89855e-22	2.29864	0.623	0.182	3.79709e-19	1	Cxcl12
3.85487e-22	2.04512	0.719	0.311	7.70974e-19	1	Egr1
7.38367e-21	1.57148	0.644	0.289	1.47673e-17	1	Vcl
3.28476e-20	3.1596	0.616	0.117	6.56952e-17	1	Nupr1
3.99832e-20	1.54112	0.692	0.23	7.99665e-17	1	Cdk6
4.11446e-20	3.31782	0.644	0.096	8.22891e-17	1	Ptprz1
6.11221e-20	2.9795	0.658	0.089	1.22244e-16	1	Bcam
9.24912e-20	2.44929	0.651	0.16	1.84982e-16	1	Hdac9
1.35247e-19	2.31046	0.671	0.18	2.70493e-16	1	Tnik
4.00662e-19	3.05632	0.671	0.206	8.01324e-16	1	Dmd
4.60519e-19	1.76599	0.582	0.261	9.21038e-16	1	Adamts1
5.98409e-19	1.79909	0.603	0.179	1.19682e-15	1	Arhgap44
7.61744e-19	2.10193	0.596	0.232	1.52349e-15	1	St6gal1
1.01986e-18	2.65291	0.644	0.17	2.03972e-15	1	Parm1
1.02792e-18	1.80615	0.658	0.179	2.05585e-15	1	Adamts9
1.09041e-18	3.09998	0.664	0.139	2.18083e-15	1	Thsd4
3.21773e-18	2.38675	0.644	0.098	6.43546e-15	1	Cap2
4.61215e-18	1.91177	0.644	0.187	9.2243e-15	1	Adamts17
1.0043e-17	0.555495	0.075	0.256	2.0086e-14	1	Atp6v1g2
1.0656e-17	0.519145	0.048	0.268	2.1312e-14	1	Abi3
1.3144e-17	2.51487	0.603	0.211	2.6288e-14	1	Pdlim5
2.26203e-17	2.07965	0.671	0.153	4.52405e-14	1	Plxdc2
4.02084e-16	1.38029	0.705	0.337	8.04167e-13	1	Sparc
1.58931e-15	0.565345	0.534	0.247	3.17862e-12	1	Akap12
1.83888e-15	1.77727	0.589	0.211	3.67777e-12	1	Mast4
3.23908e-15	3.37927	0.596	0.076	6.47817e-12	1	Dgkb
3.90299e-15	2.77334	0.603	0.182	7.80599e-12	1	Zfp36
1.71319e-14	2.59771	0.61	0.168	3.42638e-11	1	Cnn1
2.21487e-14	1.91395	0.603	0.242	4.42974e-11	1	Junb
2.85068e-14	1.67779	0.603	0.229	5.70135e-11	1	Fry
4.62868e-14	2.02294	0.61	0.167	9.25735e-11	1	Fam129a
8.38827e-14	2.92207	0.596	0.131	1.67765e-10	1	Cdh18
3.40156e-13	2.3438	0.589	0.203	6.80313e-10	1	Fosb
6.74073e-13	1.96845	0.568	0.186	1.34815e-09	1	Bicd1
7.81579e-13	2.17088	0.541	0.211	1.56316e-09	1	Gem
9.97169e-13	1.73149	0.651	0.318	1.99434e-09	1	Cst3
1.29946e-12	1.94212	0.61	0.105	2.59892e-09	1	Jph2
1.71816e-12	0.336303	0.082	0.263	3.43633e-09	1	Nell1
3.28486e-12	1.70885	0.596	0.311	6.56971e-09	1	Efna5
4.0993e-12	1.77719	0.616	0.258	8.19859e-09	1	Cobl
4.38966e-12	1.59285	0.644	0.194	8.77933e-09	1	Slc7a2
5.14255e-12	1.41801	0.568	0.237	1.02851e-08	1	Cacnb2
7.70512e-12	1.6438	0.555	0.206	1.54102e-08	1	Plcb1
8.14324e-12	1.97951	0.63	0.271	1.62865e-08	1	Nav2
2.04684e-11	0.931567	0.5	0.263	4.09367e-08	1	Cdkn1c
2.6267e-11	1.744	0.63	0.321	5.25341e-08	1	Mgp
2.82247e-11	2.5586	0.589	0.143	5.64493e-08	1	Angpt2
3.12444e-11	1.59798	0.61	0.277	6.24889e-08	1	Mtss1
3.16199e-11	1.83626	0.596	0.249	6.32397e-08	1	Stat3
3.33646e-11	2.61241	0.575	0.141	6.67292e-08	1	Mylk
9.42038e-11	0.905099	0.616	0.342	1.88408e-07	1	Ppp1cb
1.40608e-10	1.12419	0.555	0.347	2.81216e-07	1	Sfrp2
1.55105e-10	2.15275	0.541	0.229	3.10209e-07	1	Clca3a1
1.58266e-10	2.14471	0.534	0.167	3.16531e-07	1	Akap6
1.68131e-10	3.50878	0.486	0.067	3.36262e-07	1	Aoc3
1.76555e-10	1.47422	0.555	0.247	3.5311e-07	1	Rassf8
1.87532e-10	3.14607	0.534	0.046	3.75064e-07	1	Acan
1.98605e-10	1.88808	0.534	0.259	3.9721e-07	1	Plxna2
2.33784e-10	1.8551	0.527	0.216	4.67568e-07	1	Hspb1
2.88645e-10	2.56264	0.507	0.143	5.7729e-07	1	Actg2
3.21514e-10	0.963954	0.521	0.253	6.43029e-07	1	Sulf1
3.27028e-10	2.30728	0.493	0.098	6.54056e-07	1	Tnfrsf11b
3.41219e-10	2.34878	0.596	0.165	6.82438e-07	1	Bmpr1b
3.98582e-10	1.14075	0.603	0.333	7.97163e-07	1	Map1b
4.48625e-10	2.40283	0.589	0.186	8.9725e-07	1	Rapgef5
5.07621e-10	1.04197	0.63	0.323	1.01524e-06	1	Bgn
6.6014e-10	2.45726	0.548	0.21	1.32028e-06	1	Pde4b
1.46512e-09	2.20787	0.514	0.198	2.93024e-06	1	Frmd4b
3.35861e-09	2.33035	0.514	0.119	6.71722e-06	1	Prkaa2
4.0803e-09	2.04653	0.541	0.119	8.16059e-06	1	Grb14
6.19662e-09	1.36146	0.575	0.337	1.23932e-05	1	Igf2
9.29359e-09	0.410424	0.103	0.256	1.85872e-05	1	1110019D14Rik
1.52191e-08	2.13828	0.541	0.165	3.04382e-05	1	Socs3
1.89127e-08	3.08467	0.548	0.05	3.78255e-05	1	Ldb3
2.48772e-08	1.61981	0.459	0.275	4.97544e-05	1	Rin2
3.00546e-08	1.35679	0.541	0.299	6.01092e-05	1	Frmd4a
3.68191e-08	2.28362	0.527	0.108	7.36381e-05	1	Corin
3.72818e-08	3.45855	0.527	0.067	7.45637e-05	1	Entpd1
3.73751e-08	0.471545	0.199	0.32	7.47501e-05	1	Sytl2
4.0886e-08	1.68745	0.514	0.234	8.17721e-05	1	Crim1
4.65277e-08	1.88182	0.514	0.251	9.30553e-05	1	Stx1a
5.21418e-08	2.0582	0.541	0.177	0.000104284	1	Rasl11a
6.86946e-08	1.48361	0.616	0.308	0.000137389	1	Sfrp1
1.04426e-07	1.32482	0.555	0.268	0.000208852	1	Ier2
1.28792e-07	1.78203	0.555	0.125	0.000257584	1	Abcc9
1.59757e-07	2.16859	0.493	0.175	0.000319514	1	Tnnt2
1.6206e-07	0.841196	0.61	0.302	0.000324119	1	Sgcd
2.82338e-07	0.261733	0.253	0.23	0.000564676	1	Baiap2l1
3.05688e-07	1.79003	0.568	0.251	0.000611376	1	Dusp1
3.57277e-07	1.82365	0.493	0.11	0.000714554	1	Pgm5
4.03012e-07	1.14908	0.582	0.34	0.000806023	1	Mfap4
9.10948e-07	1.11252	0.459	0.247	0.0018219	1	Etl4
1.84632e-06	1.99443	0.473	0.148	0.00369264	1	Il13ra1
2.33007e-06	2.33065	0.534	0.149	0.00466014	1	Pdgfd
2.39136e-06	2.56986	0.507	0.108	0.00478273	1	Pclo
3.46667e-06	1.39645	0.527	0.198	0.00693334	1	Clu
3.83908e-06	2.9536	0.342	0.038	0.00767816	1	Cytip
4.13449e-06	1.91015	0.527	0.22	0.00826898	1	Cdh13
4.32207e-06	2.19231	0.514	0.127	0.00864414	1	Serpine1
4.45159e-06	0.309957	0.11	0.282	0.00890318	1	Zfp595
4.51778e-06	1.80109	0.514	0.172	0.00903556	1	Ptp4a3
4.62366e-06	2.38871	0.5	0.096	0.00924732	1	Gm13889
5.82174e-06	1.51933	0.445	0.241	0.0116435	1	Hsph1
6.40632e-06	0.42745	0.089	0.251	0.0128126	1	Stc2
8.09031e-06	2.20518	0.479	0.182	0.0161806	1	Ccdc141
1.12355e-05	2.06669	0.466	0.218	0.022471	1	Abtb2
1.30451e-05	1.76679	0.534	0.284	0.0260902	1	Jun
1.59998e-05	0.46194	0.233	0.277	0.0319996	1	Hist1h1c
1.66496e-05	1.87958	0.445	0.172	0.0332991	1	Gfod1
1.78829e-05	0.608051	0.555	0.363	0.0357659	1	Plcl1
2.36506e-05	1.54651	0.5	0.265	0.0473012	1	Slc24a3
2.43065e-05	3.30069	0.425	0.081	0.0486131	1	Sost
2.44016e-05	1.23165	0.486	0.314	0.0488033	1	Prkg1
2.67414e-05	1.06238	0.466	0.249	0.0534827	1	Zfpm2
4.39665e-05	0.721823	0.521	0.385	0.0879331	1	Camk1d
5.83067e-05	0.793302	0.514	0.325	0.116613	1	Ppm1e
5.90739e-05	0.466315	0.479	0.328	0.118148	1	Ccdc80
6.56866e-05	1.14759	0.493	0.273	0.131373	1	Ncald
6.94425e-05	1.3334	0.452	0.16	0.138885	1	Smoc2
7.03476e-05	3.36176	0.39	0.07	0.140695	1	Tnnc1
8.34832e-05	0.260321	0.493	0.273	0.166966	1	Plagl1
9.76644e-05	1.85302	0.493	0.254	0.195329	1	Gadd45b
0.00016821	0.481707	0.288	0.211	0.336419	1	Disc1
0.000203569	1.86275	0.425	0.167	0.407139	1	Brinp1
0.000222797	2.29147	0.274	0.043	0.445594	1	Slc15a2
0.000236277	0.43867	0.315	0.373	0.472553	1	Adgrl3
0.00025268	1.3326	0.411	0.21	0.50536	1	Syt1
0.00025268	0.339245	0.308	0.342	0.50536	1	Hmcn1
0.00028556	0.298046	0.233	0.256	0.571121	1	5730480H06Rik
0.000326808	1.85986	0.445	0.17	0.653617	1	Klf2
0.000401752	0.310827	0.26	0.261	0.803504	1	Ier3
0.000429397	2.18917	0.39	0.077	0.858793	1	Thbd
0.000447566	3.12101	0.322	0.017	0.895131	1	Grp
0.000581931	2.02749	0.493	0.125	1	1	Ldb2
0.000852545	3.36255	0.452	0.089	1	1	Gna14
0.000985431	0.296456	0.267	0.304	1	1	Chsy3
0.00101993	2.55226	0.432	0.124	1	1	Kcnip4
0.00115146	0.636199	0.5	0.239	1	1	Hs6st2
0.00120982	0.845642	0.164	0.287	1	1	Erc2
0.00126117	1.14481	0.432	0.265	1	1	Lmcd1
0.00134096	0.534285	0.541	0.34	1	1	Inhba
0.00134507	0.346475	0.288	0.318	1	1	Nkain2
0.00158262	0.364004	0.308	0.287	1	1	Mpp7
0.00174781	0.454505	0.329	0.369	1	1	Epha5
0.00180092	1.28384	0.459	0.203	1	1	Ogn
0.00181307	1.27378	0.555	0.266	1	1	Fam8a1
0.00184446	1.0344	0.26	0.254	1	1	Glis3
0.00186382	0.429381	0.247	0.268	1	1	A830082K12Rik
0.00207094	1.65696	0.459	0.179	1	1	Arap2
0.00208014	0.282615	0.274	0.369	1	1	Eml6
0.00208782	0.408309	0.329	0.287	1	1	Napb
0.0021267	1.98738	0.397	0.155	1	1	Rgs4
0.00229561	0.385594	0.377	0.333	1	1	Mecom
0.00234314	0.516113	0.521	0.423	1	1	Ubc
0.0023846	0.812797	0.308	0.304	1	1	Nr2f2
0.00282952	1.40667	0.521	0.237	1	1	Ddx3y
0.00291622	3.15478	0.459	0.089	1	1	Gm19466
0.0029288	2.19606	0.288	0.043	1	1	Myh7
0.00299246	1.84941	0.459	0.256	1	1	Itga8
0.00302259	0.361201	0.288	0.179	1	1	Abca3
0.00307491	0.842913	0.363	0.235	1	1	Adamts12
0.00322763	2.34256	0.384	0.079	1	1	Crabp2
0.00375444	0.319563	0.26	0.27	1	1	Rdh5
0.00386117	2.99429	0.39	0.046	1	1	Colec10
0.00436431	0.458287	0.425	0.325	1	1	Erbb4
0.00461843	0.875426	0.459	0.301	1	1	Hes1
0.00624186	1.29803	0.445	0.282	1	1	Gxylt2
0.00686944	1.92272	0.479	0.28	1	1	Crip1
0.00722303	0.754759	0.486	0.342	1	1	Slc25a5
0.00728033	0.618981	0.445	0.342	1	1	Kif26b
0.00728982	1.37026	0.493	0.196	1	1	Osbpl3
0.00736704	1.16443	0.438	0.342	1	1	Igfbp7
0.00773334	0.656314	0.267	0.107	1	1	Tc2n
0.00834039	2.35201	0.329	0.053	1	1	Kcnmb1
0.00878365	0.787862	0.432	0.275	1	1	Phactr2
0.00948793	1.22718	0.432	0.256	1	1	B3galt1
1.28348e-37	3.10507	0.924	0.274	2.56696e-34	2	Auts2
6.84998e-35	3.04716	0.913	0.308	1.37e-31	2	Zfp423
2.39416e-34	3.444	0.88	0.289	4.78833e-31	2	Xylt1
5.61482e-34	2.35974	0.935	0.352	1.12296e-30	2	Tbx20
2.41587e-33	3.12369	0.891	0.266	4.83175e-30	2	Abi3bp
2.76469e-33	2.57469	0.935	0.369	5.52938e-30	2	Sox5
6.60202e-33	3.09949	0.87	0.294	1.3204e-29	2	Pde4d
1.56842e-32	3.30319	0.859	0.237	3.13684e-29	2	Eda
6.78155e-32	3.03717	0.859	0.307	1.35631e-28	2	Bmp6
9.47451e-31	2.4454	0.913	0.365	1.8949e-27	2	Sox6
3.1328e-30	2.47957	0.87	0.338	6.2656e-27	2	Sdk1
5.7609e-30	3.0344	0.902	0.275	1.15218e-26	2	Ralgapa2
4.19109e-29	2.31098	0.891	0.403	8.38217e-26	2	Dlg2
7.525e-29	2.48604	0.891	0.338	1.505e-25	2	Psd3
2.78637e-27	2.67551	0.837	0.256	5.57275e-24	2	Ltbp2
2.59121e-26	2.65886	0.837	0.308	5.18242e-23	2	Ctnna2
9.93099e-26	2.64949	0.859	0.341	1.9862e-22	2	Zfp521
2.05499e-25	2.48967	0.826	0.314	4.10997e-22	2	Setbp1
2.01801e-24	2.59803	0.815	0.313	4.03603e-21	2	Sorbs1
2.22633e-24	2.41796	0.837	0.376	4.45265e-21	2	Smad6
3.07015e-24	1.59682	0.902	0.407	6.14029e-21	2	Malat1
1.01401e-22	2.45506	0.815	0.322	2.02802e-19	2	Tox
3.2349e-22	2.39813	0.837	0.362	6.46979e-19	2	Sipa1l1
1.58118e-21	2.39717	0.761	0.272	3.16235e-18	2	Myo1d
1.82414e-21	2.97002	0.783	0.296	3.64828e-18	2	Prr16
1.89044e-21	2.19627	0.804	0.371	3.78088e-18	2	Pknox2
2.10398e-21	2.40979	0.804	0.341	4.20797e-18	2	Srgap1
3.32379e-21	2.41802	0.783	0.186	6.64757e-18	2	Kcnj15
1.71767e-20	2.30554	0.826	0.33	3.43533e-17	2	Chst11
2.08521e-20	2.13241	0.783	0.307	4.17042e-17	2	Fgfr2
7.44055e-20	1.93669	0.804	0.338	1.48811e-16	2	Adamts19
6.93099e-19	2.52872	0.772	0.336	1.3862e-15	2	Gse1
1.18557e-18	1.52877	0.859	0.373	2.37113e-15	2	Robo2
2.50812e-18	2.79126	0.761	0.247	5.01624e-15	2	Dapk1
4.51921e-18	1.76369	0.696	0.291	9.03843e-15	2	Mecom
2.73147e-17	2.47691	0.728	0.299	5.46293e-14	2	C1qtnf7
8.5152e-17	2.65631	0.674	0.259	1.70304e-13	2	Papss2
1.00923e-16	2.56624	0.75	0.318	2.01847e-13	2	Prdm11
1.81547e-16	2.54751	0.717	0.324	3.63094e-13	2	Kcnmb4
1.59265e-15	1.46157	0.761	0.333	3.18529e-12	2	Ank2
2.32098e-15	2.00318	0.707	0.283	4.64196e-12	2	Pcdh11x
2.38116e-15	2.21777	0.739	0.319	4.76232e-12	2	Slc4a4
2.93371e-15	1.65202	0.696	0.278	5.86743e-12	2	Rora
3.23488e-15	2.1839	0.739	0.357	6.46976e-12	2	2610035D17Rik
6.22584e-15	0.823243	0.25	0.085	1.24517e-11	2	Paqr6
8.14286e-15	2.08502	0.728	0.426	1.62857e-11	2	2610307P16Rik
1.1183e-14	2.35506	0.685	0.297	2.2366e-11	2	Lmo7
1.14659e-14	2.13357	0.717	0.275	2.29318e-11	2	Sorbs2
1.54613e-14	1.91587	0.761	0.385	3.09225e-11	2	Hecw2
1.67958e-14	2.22781	0.717	0.297	3.35916e-11	2	Plxna4
1.83948e-14	1.82197	0.75	0.36	3.67897e-11	2	C430049B03Rik
3.69764e-14	1.46095	0.739	0.31	7.39527e-11	2	Meox1
5.83176e-14	1.82821	0.75	0.382	1.16635e-10	2	Itpr2
1.55476e-13	2.09428	0.739	0.363	3.10952e-10	2	Dleu2
1.89692e-13	1.24749	0.63	0.266	3.79383e-10	2	Rin2
2.47361e-13	2.37683	0.685	0.365	4.94723e-10	2	Klhl29
3.12179e-13	2.5145	0.609	0.192	6.24358e-10	2	Adamts20
3.51266e-13	2.18741	0.696	0.374	7.02532e-10	2	St6galnac3
4.30708e-13	2.33615	0.685	0.288	8.61415e-10	2	Strip2
6.38615e-13	1.81293	0.641	0.272	1.27723e-09	2	Bmper
6.79556e-13	1.71563	0.717	0.324	1.35911e-09	2	Tmtc2
7.42956e-13	1.69799	0.696	0.379	1.48591e-09	2	Adamts6
1.88238e-12	1.72835	0.685	0.329	3.76476e-09	2	Pdzrn3
2.12603e-12	2.00368	0.717	0.321	4.25206e-09	2	Fhod3
2.69936e-12	2.08425	0.326	0.116	5.39872e-09	2	Kcns1
4.79924e-12	1.868	0.533	0.193	9.59848e-09	2	Col2a1
1.22079e-11	2.16981	0.728	0.303	2.44157e-08	2	Srgap3
1.30889e-11	1.53742	0.717	0.417	2.61778e-08	2	Npas3
1.52075e-11	1.60205	0.717	0.368	3.0415e-08	2	Fbxl7
1.60637e-11	1.97877	0.652	0.296	3.21274e-08	2	Slc2a13
1.64192e-11	0.987956	0.663	0.308	3.28384e-08	2	Meg3
2.02784e-11	1.91417	0.717	0.381	4.05569e-08	2	Rasgef1b
2.065e-11	1.55754	0.696	0.347	4.12999e-08	2	Mamld1
2.1569e-11	0.378807	0.272	0.138	4.3138e-08	2	Gpr171
2.18842e-11	1.88704	0.674	0.336	4.37684e-08	2	Tmem108
2.73368e-11	1.11592	0.272	0.131	5.46736e-08	2	Dok4
2.85978e-11	1.2637	0.793	0.393	5.71956e-08	2	Xist
3.10682e-11	1.76152	0.696	0.355	6.21364e-08	2	Palld
3.48557e-11	2.08966	0.707	0.42	6.97115e-08	2	Eya4
4.59182e-11	2.01898	0.63	0.314	9.18363e-08	2	Adarb1
6.43726e-11	2.21696	0.641	0.186	1.28745e-07	2	Kcnma1
6.52912e-11	1.91187	0.63	0.277	1.30582e-07	2	Tbc1d4
8.81397e-11	2.42869	0.652	0.277	1.76279e-07	2	Fmnl2
1.77785e-10	1.62633	0.696	0.33	3.55569e-07	2	Dkk3
2.21005e-10	0.785097	0.25	0.132	4.4201e-07	2	D3Ertd751e
2.40871e-10	1.52963	0.272	0.121	4.81742e-07	2	Plac1
3.16871e-10	1.83484	0.728	0.374	6.33741e-07	2	Kcnq5
3.32388e-10	1.28826	0.696	0.369	6.64776e-07	2	Gphn
3.54639e-10	1.91507	0.62	0.226	7.09278e-07	2	Matn4
3.87459e-10	1.85799	0.62	0.286	7.74919e-07	2	Fxyd6
4.06341e-10	1.81419	0.663	0.31	8.12683e-07	2	Magi2
4.7815e-10	1.6908	0.63	0.366	9.56299e-07	2	Prkca
4.92929e-10	2.06143	0.62	0.261	9.85858e-07	2	5730522E02Rik
6.69754e-10	2.12737	0.543	0.255	1.33951e-06	2	Arhgef26
8.24209e-10	1.40816	0.283	0.124	1.64842e-06	2	Gpr85
1.00993e-09	1.33108	0.685	0.418	2.01985e-06	2	Gata4
1.03026e-09	1.51089	0.663	0.318	2.06051e-06	2	Lef1
1.17635e-09	1.54407	0.663	0.358	2.35269e-06	2	Ctnna3
1.60369e-09	1.32547	0.652	0.307	3.20738e-06	2	Pitpnc1
1.71808e-09	0.978559	0.261	0.119	3.43616e-06	2	Etnk2
1.72938e-09	1.95883	0.641	0.258	3.45877e-06	2	Dlgap1
4.00458e-09	1.28419	0.609	0.327	8.00915e-06	2	Ptprk
4.21517e-09	2.10345	0.457	0.154	8.43034e-06	2	Snx32
5.38949e-09	1.38167	0.609	0.335	1.0779e-05	2	Lhfpl2
7.07804e-09	3.00405	0.565	0.217	1.41561e-05	2	Caln1
7.07804e-09	1.96849	0.609	0.248	1.41561e-05	2	Grk5
8.00387e-09	2.00738	0.587	0.285	1.60077e-05	2	Gm16070
1.06788e-08	1.9099	0.543	0.209	2.13576e-05	2	Aldh1a1
1.18726e-08	1.71634	0.598	0.33	2.37451e-05	2	Rspo3
1.27131e-08	1.7931	0.63	0.363	2.54261e-05	2	Grip1
1.35271e-08	1.72453	0.641	0.371	2.70543e-05	2	Ank3
1.57415e-08	1.51328	0.63	0.303	3.1483e-05	2	Erbb4
1.83063e-08	2.24803	0.467	0.201	3.66125e-05	2	Gprin3
2.05074e-08	1.70459	0.576	0.329	4.10148e-05	2	Mpped2
2.17355e-08	1.22209	0.62	0.332	4.3471e-05	2	Rapgef4
2.26502e-08	1.20806	0.272	0.149	4.53004e-05	2	Rgl3
3.78664e-08	1.17048	0.261	0.131	7.57327e-05	2	Sox30
4.39979e-08	2.03907	0.522	0.209	8.79957e-05	2	Syndig1
4.43949e-08	0.267503	0.783	0.436	8.87898e-05	2	Hist1h1a
5.66961e-08	1.81217	0.5	0.209	0.000113392	2	Fmod
5.84002e-08	0.831234	0.283	0.157	0.0001168	2	Six4
5.8753e-08	1.86899	0.641	0.308	0.000117506	2	Boc
6.71303e-08	0.356521	0.391	0.228	0.000134261	2	Kif24
8.1543e-08	1.31717	0.522	0.325	0.000163086	2	Pik3r3
9.35886e-08	1.74042	0.598	0.338	0.000187177	2	Sobp
9.72136e-08	1.56958	0.641	0.297	0.000194427	2	Nhs
9.83561e-08	2.76206	0.478	0.115	0.000196712	2	Dapk2
1.01565e-07	1.81817	0.652	0.283	0.000203131	2	Pde10a
1.04266e-07	1.81857	0.576	0.31	0.000208533	2	Znrf3
1.09241e-07	1.24232	0.359	0.171	0.000218481	2	Slc35f1
1.20585e-07	1.50053	0.457	0.285	0.00024117	2	Parpbp
1.31155e-07	1.49524	0.587	0.286	0.000262309	2	Acer2
1.34416e-07	1.11325	0.293	0.148	0.000268832	2	Ttc39a
1.52393e-07	1.26159	0.25	0.113	0.000304786	2	Chadl
2.09426e-07	0.536691	0.326	0.252	0.000418852	2	Hapln1
2.18563e-07	1.48279	0.543	0.275	0.000437126	2	Tnfrsf19
2.22325e-07	2.52793	0.337	0.11	0.000444649	2	Rnf144b
2.3069e-07	1.32761	0.587	0.332	0.000461381	2	Ltbp1
2.45546e-07	1.22291	0.511	0.302	0.000491091	2	Col9a1
2.55476e-07	0.505901	0.25	0.14	0.000510951	2	Aldh1a3
2.96701e-07	1.54906	0.641	0.365	0.000593402	2	Sncaip
3.07754e-07	2.34945	0.576	0.244	0.000615508	2	Tmem178
3.16526e-07	1.82471	0.565	0.341	0.000633052	2	Wdpcp
3.39525e-07	1.42896	0.609	0.385	0.000679051	2	Cdh2
3.60084e-07	1.6568	0.576	0.296	0.000720168	2	Nuak1
4.12833e-07	2.35492	0.5	0.184	0.000825665	2	Ccdc30
4.34022e-07	2.09595	0.359	0.091	0.000868045	2	B4galnt3
4.58797e-07	0.921063	0.576	0.259	0.000917594	2	Snx29
6.82036e-07	1.85494	0.576	0.409	0.00136407	2	Prickle2
6.83902e-07	1.28135	0.609	0.297	0.0013678	2	Slc1a3
8.87999e-07	1.0895	0.478	0.278	0.001776	2	Racgap1
9.42434e-07	1.71153	0.576	0.25	0.00188487	2	Arhgef3
9.68226e-07	0.411301	0.739	0.44	0.00193645	2	Neil3
1.2766e-06	1.55546	0.543	0.27	0.00255321	2	D130040H23Rik
1.34302e-06	1.1911	0.609	0.319	0.00268604	2	Lama2
1.57516e-06	0.912547	0.272	0.113	0.00315033	2	Clstn3
1.6564e-06	1.29559	0.63	0.352	0.00331279	2	Maml3
1.66518e-06	1.73206	0.261	0.184	0.00333036	2	Dmc1
1.74165e-06	1.57767	0.565	0.319	0.0034833	2	Pbx3
1.75086e-06	2.96928	0.522	0.214	0.00350173	2	Cmya5
1.76944e-06	1.2532	0.293	0.181	0.00353887	2	Cadm1
1.8849e-06	1.47274	0.587	0.393	0.0037698	2	Fat4
2.05555e-06	2.14274	0.543	0.28	0.00411109	2	Arsj
2.14353e-06	1.75792	0.598	0.313	0.00428707	2	Zc3h12b
2.50026e-06	1.52485	0.25	0.101	0.00500053	2	P2ry2
2.64054e-06	1.38681	0.5	0.217	0.00528107	2	Elmo1
3.00546e-06	0.793936	0.62	0.362	0.00601091	2	Epha7
3.37486e-06	1.37501	0.543	0.346	0.00674971	2	Edil3
3.48943e-06	1.89472	0.554	0.318	0.00697887	2	Wwc1
3.52543e-06	1.57004	0.478	0.264	0.00705087	2	Mpp7
3.96578e-06	1.49956	0.25	0.131	0.00793156	2	Gdnf
4.56183e-06	1.24879	0.62	0.278	0.00912367	2	Aff3
5.02273e-06	1.14409	0.283	0.165	0.0100455	2	Cyp26a1
5.34993e-06	2.04879	0.543	0.299	0.0106999	2	Runx1
5.41777e-06	1.84009	0.5	0.219	0.0108355	2	Thrb
5.45887e-06	2.3669	0.337	0.097	0.0109177	2	Chst9
6.8059e-06	2.07857	0.424	0.164	0.0136118	2	Atp8a2
6.80631e-06	1.86599	0.315	0.198	0.0136126	2	Crtac1
6.87453e-06	0.997515	0.261	0.162	0.0137491	2	Top1mt
6.89172e-06	0.603231	0.25	0.201	0.0137834	2	Rfx2
7.44464e-06	1.88097	0.348	0.209	0.0148893	2	Dpy19l2
7.90158e-06	1.09252	0.391	0.198	0.0158032	2	Syt9
8.04968e-06	1.31563	0.489	0.318	0.0160994	2	Gpr173
8.28222e-06	0.287915	0.598	0.373	0.0165644	2	Aspm
8.38526e-06	1.61368	0.413	0.215	0.0167705	2	Msx1
8.74486e-06	1.55617	0.522	0.204	0.0174897	2	Wnk2
9.93855e-06	1.6265	0.565	0.335	0.0198771	2	Tox3
1.02856e-05	1.71712	0.522	0.401	0.0205712	2	Piezo2
1.05406e-05	0.466079	0.728	0.487	0.0210811	2	Bub1
1.33153e-05	0.957148	0.587	0.381	0.0266306	2	Aff2
1.41792e-05	1.20599	0.522	0.322	0.0283584	2	Rtn1
1.4631e-05	1.82019	0.272	0.115	0.0292619	2	Cadps2
1.55759e-05	1.23789	0.38	0.308	0.0311519	2	Ptprb
1.64997e-05	1.69644	0.565	0.308	0.0329993	2	Trabd2b
1.99705e-05	1.06799	0.272	0.159	0.039941	2	Trpc4
2.0018e-05	0.264631	0.196	0.384	0.040036	2	Vcl
2.16985e-05	0.607759	0.641	0.415	0.0433969	2	Ccnf
2.30459e-05	0.62303	0.598	0.398	0.0460918	2	Plag1
2.41299e-05	1.46914	0.565	0.314	0.0482597	2	Tiam2
2.66313e-05	1.42264	0.478	0.272	0.0532626	2	Scube2
3.09223e-05	1.55287	0.576	0.242	0.0618446	2	Synj2
3.13567e-05	0.511347	0.174	0.308	0.0627133	2	Hs6st2
3.20935e-05	1.25384	0.63	0.381	0.064187	2	Plekhg1
3.28457e-05	0.313519	0.261	0.178	0.0656914	2	Tmc7
3.60311e-05	1.04964	0.522	0.264	0.0720622	2	Lrch1
3.89662e-05	1.7924	0.467	0.313	0.0779324	2	Rgs6
4.61578e-05	1.42843	0.293	0.168	0.0923155	2	Arhgap20
4.75446e-05	1.20056	0.293	0.195	0.0950891	2	Adamtsl2
4.85277e-05	1.37643	0.337	0.212	0.0970554	2	Asb4
5.14773e-05	1.18659	0.565	0.371	0.102955	2	Tnc
5.3376e-05	0.337042	0.293	0.256	0.106752	2	Stk17b
5.38607e-05	0.631635	0.293	0.23	0.107721	2	Fan1
5.67305e-05	1.13813	0.272	0.149	0.113461	2	Zscan20
6.13791e-05	1.4352	0.533	0.311	0.122758	2	Colec12
6.86476e-05	1.43788	0.196	0.255	0.137295	2	Fmn2
7.05094e-05	0.612713	0.446	0.264	0.141019	2	Mast4
7.06667e-05	1.63202	0.489	0.333	0.141333	2	Col11a1
9.33721e-05	1.63766	0.478	0.228	0.186744	2	Dgki
9.77698e-05	1.95617	0.391	0.219	0.19554	2	Trim2
0.000107158	0.871333	0.543	0.313	0.214317	2	Dclk2
0.000110713	1.84372	0.543	0.322	0.221426	2	Mitf
0.00011339	1.61172	0.554	0.283	0.22678	2	Stard13
0.000124452	1.02977	0.533	0.281	0.248904	2	Eps8
0.00012499	0.969943	0.587	0.426	0.249981	2	Trps1
0.000125261	2.50748	0.304	0.14	0.250521	2	Gm2115
0.000126346	1.12211	0.457	0.325	0.252693	2	Pola1
0.000135649	1.69986	0.326	0.157	0.271297	2	Nsun7
0.000136961	0.84372	0.25	0.186	0.273923	2	Stag3
0.000143122	1.5415	0.533	0.294	0.286243	2	C530008M17Rik
0.000146845	1.53721	0.489	0.318	0.293689	2	Gria3
0.000150658	0.806443	0.348	0.247	0.301317	2	Neil2
0.000152276	1.07421	0.152	0.263	0.304551	2	Gm10125
0.000152927	1.60923	0.391	0.25	0.305853	2	Sphkap
0.000154896	1.47978	0.533	0.261	0.309792	2	Abca1
0.000167578	2.11674	0.5	0.256	0.335156	2	Kirrel3
0.000178571	0.745941	0.402	0.247	0.357142	2	Sall3
0.000187455	1.91244	0.37	0.2	0.374909	2	Slc16a10
0.000218024	1.58244	0.478	0.259	0.436049	2	Sergef
0.000233062	0.597951	0.511	0.319	0.466125	2	Cthrc1
0.000257454	1.27074	0.543	0.292	0.514908	2	Gtdc1
0.000261205	0.561163	0.25	0.209	0.52241	2	Prph
0.000309134	0.827247	0.315	0.215	0.618269	2	Larp1b
0.0003104	1.79411	0.402	0.234	0.6208	2	Bcl11b
0.000349294	1.00257	0.413	0.256	0.698587	2	Plcb1
0.000358615	0.861214	0.391	0.234	0.71723	2	4933407K13Rik
0.000371902	1.00265	0.359	0.248	0.743803	2	Dgka
0.000426387	1.29905	0.533	0.362	0.852774	2	2022-03-03
0.000437606	1.72531	0.315	0.19	0.875213	2	BC006965
0.000450018	0.825658	0.467	0.369	0.900036	2	Has2
0.000478655	0.361249	0.457	0.368	0.957309	2	Kif20b
0.000480559	1.28952	0.5	0.366	0.961118	2	Limch1
0.000496545	1.21438	0.413	0.248	0.993089	2	Pcdhga12
0.000512012	1.31382	0.467	0.294	1	2	Sema6d
0.000523256	0.662548	0.315	0.186	1	2	Asap3
0.000529492	1.01082	0.413	0.267	1	2	Ackr3
0.000594565	1.01956	0.272	0.195	1	2	Lix1
0.000599236	1.05016	0.533	0.332	1	2	Flrt2
0.000605712	0.576646	0.283	0.164	1	2	Zfp287
0.00063537	1.51039	0.435	0.289	1	2	Fam219a
0.000652918	1.47423	0.283	0.189	1	2	Rgs2
0.00066443	1.13508	0.283	0.167	1	2	Ankrd13d
0.000670915	1.51463	0.533	0.373	1	2	Adcy2
0.000688039	0.608479	0.609	0.327	1	2	Pcdh9
0.000704205	1.08939	0.554	0.355	1	2	Mboat2
0.000760668	0.446932	0.261	0.186	1	2	Slc6a15
0.000762141	1.30495	0.457	0.354	1	2	Gas7
0.000786675	1.53084	0.435	0.346	1	2	Osbpl10
0.000818193	1.73053	0.5	0.231	1	2	Rassf2
0.000830805	1.59148	0.391	0.297	1	2	Arhgap18
0.000879723	1.87993	0.435	0.255	1	2	4933406I18Rik
0.000924258	1.58533	0.522	0.275	1	2	Phka1
0.000926019	0.867935	0.522	0.384	1	2	Pde7b
0.000981953	0.799601	0.272	0.104	1	2	Ptger3
0.00101013	1.08554	0.293	0.159	1	2	Adarb2
0.00104984	0.374189	0.326	0.192	1	2	Traf3ip1
0.00105676	0.635587	0.565	0.327	1	2	Cttnbp2
0.00111995	1.04564	0.467	0.231	1	2	Frmd4b
0.00114107	1.1749	0.413	0.269	1	2	Bmp2
0.001227	1.15198	0.293	0.135	1	2	Rragb
0.00123156	0.304372	0.522	0.285	1	2	Gxylt2
0.00130433	0.864427	0.543	0.341	1	2	Tgfbi
0.00132374	1.23181	0.261	0.189	1	2	Ccdc148
0.00139379	0.948395	0.38	0.283	1	2	Napb
0.00155559	0.622536	0.489	0.379	1	2	Thbs1
0.00162797	0.460127	0.38	0.34	1	2	Cit
0.00169729	1.17103	0.304	0.321	1	2	Fat3
0.00172515	1.55213	0.543	0.36	1	2	Ahcyl2
0.00179178	2.01939	0.413	0.186	1	2	Cyp26b1
0.00187083	0.356506	0.261	0.355	1	2	Gpm6b
0.00203499	2.50921	0.37	0.231	1	2	2810404M03Rik
0.00206789	0.632035	0.457	0.259	1	2	Egln3
0.00213138	0.756981	0.283	0.171	1	2	Aatk
0.00236167	2.13839	0.457	0.303	1	2	Lsamp
0.00242909	1.09205	0.391	0.281	1	2	Ptprj
0.00252024	1.07165	0.283	0.153	1	2	Yipf2
0.00260542	1.54699	0.38	0.197	1	2	Fzd6
0.00282262	0.527103	0.326	0.236	1	2	Lrp3
0.00290698	0.994667	0.261	0.157	1	2	4631405J19Rik
0.00297818	1.4157	0.543	0.403	1	2	Daam2
0.00332437	1.19903	0.446	0.316	1	2	Inpp4b
0.00335863	0.85499	0.25	0.182	1	2	Lurap1
0.00354687	0.96622	0.402	0.264	1	2	Rnf182
0.00380849	1.28273	0.478	0.316	1	2	Cyp7b1
0.00401946	0.371885	0.424	0.347	1	2	Efcab11
0.0040944	1.4833	0.293	0.137	1	2	Tbx5
0.00416362	1.09041	0.435	0.382	1	2	Pcbp3
0.00418459	1.08908	0.402	0.288	1	2	Fign
0.00426232	1.56238	0.5	0.404	1	2	P3h2
0.00430158	1.22102	0.315	0.222	1	2	Ago4
0.00445125	0.836789	0.5	0.318	1	2	Vegfc
0.00445125	0.482969	0.467	0.338	1	2	Igf1
0.00451089	1.61475	0.435	0.203	1	2	Sorcs3
0.00462468	1.2446	0.359	0.164	1	2	Trim63
0.00467092	1.14172	0.554	0.333	1	2	Col6a6
0.00490031	0.688444	0.402	0.244	1	2	Carf
0.00541654	1.40888	0.5	0.314	1	2	Ppargc1a
0.00560529	1.78826	0.446	0.248	1	2	Kctd8
0.00564191	0.685529	0.598	0.41	1	2	Arhgap28
0.00579996	0.742023	0.315	0.286	1	2	Efr3b
0.00593311	0.910102	0.5	0.258	1	2	Pappa
0.006268	0.758702	0.489	0.396	1	2	Vcan
0.0069338	1.16749	0.337	0.179	1	2	Utp14b
0.00694487	1.47635	0.413	0.255	1	2	Lrrtm3
0.0073131	0.69662	0.359	0.19	1	2	Gnb1l
0.00780881	1.2387	0.272	0.236	1	2	Moxd1
0.00821135	0.963318	0.239	0.379	1	2	Epha5
0.00834738	0.9665	0.457	0.252	1	2	Pdpr
0.00860549	1.23828	0.511	0.336	1	2	Negr1
0.00864582	0.755552	0.359	0.289	1	2	Lmcd1
0.0093433	0.790499	0.5	0.368	1	2	Ern1
0.00943741	0.867074	0.25	0.245	1	2	Ppm1h
0.00993699	1.38346	0.435	0.274	1	2	Mertk
5.3051e-25	2.85496	0.835	0.191	1.06102e-21	3	Sall3
4.53001e-21	1.74014	0.847	0.317	9.06002e-18	3	Dcn
1.71857e-20	2.14134	0.812	0.347	3.43715e-17	3	Pde7b
2.05764e-20	1.73692	0.847	0.297	4.11527e-17	3	Lef1
1.32903e-18	1.83429	0.788	0.313	2.65805e-15	3	Rapgef4
9.91241e-18	2.52132	0.765	0.266	1.98248e-14	3	Fam78b
1.0546e-17	3.50343	0.729	0.176	2.10921e-14	3	Pcdh15
1.82912e-17	1.22784	0.812	0.232	3.65824e-14	3	Dpt
9.0201e-17	1.65595	0.835	0.404	1.80402e-13	3	Npas3
9.27406e-17	1.34802	0.824	0.4	1.85481e-13	3	Postn
2.28366e-16	2.81608	0.718	0.19	4.56731e-13	3	Tmem132c
2.57142e-16	1.87627	0.788	0.373	5.14285e-13	3	Itm2b
6.08395e-16	1.66277	0.706	0.322	1.21679e-12	3	Dbi
9.03306e-16	2.14859	0.682	0.194	1.80661e-12	3	Aldh1a1
1.26845e-15	1.28706	0.812	0.327	2.5369e-12	3	Limch1
1.74978e-14	1.47496	0.729	0.297	3.49957e-11	3	Rtn1
3.05655e-14	1.56943	0.647	0.264	6.11309e-11	3	Tnfrsf19
5.51669e-14	1.8791	0.682	0.271	1.10334e-10	3	Bmper
2.0476e-13	2.23801	0.671	0.233	4.0952e-10	3	Egln3
1.109e-12	1.67395	0.541	0.087	2.218e-09	3	P2rx7
1.14032e-12	1.51226	0.694	0.233	2.28064e-09	3	Kirrel3
2.18075e-12	1.85396	0.659	0.278	4.36149e-09	3	Prss35
2.54131e-12	2.47842	0.553	0.089	5.08261e-09	3	Pkp2
3.05408e-12	0.826603	0.706	0.306	6.10816e-09	3	Col6a1
3.62537e-12	1.70081	0.612	0.215	7.25074e-09	3	Hapln1
7.58134e-12	1.83665	0.647	0.187	1.51627e-08	3	Msx1
9.42874e-12	1.61489	0.694	0.32	1.88575e-08	3	Ramp2
1.26395e-11	1.12695	0.624	0.327	2.5279e-08	3	Igfbp7
1.46523e-11	1.87091	0.671	0.261	2.93045e-08	3	Nav3
1.79655e-11	1.83516	0.6	0.179	3.59311e-08	3	Adamtsl3
2.14385e-11	2.55814	0.518	0.118	4.2877e-08	3	Bmp5
2.20918e-11	0.6217	0.6	0.277	4.41835e-08	3	Col6a2
2.8491e-11	1.57221	0.612	0.295	5.6982e-08	3	Rgs6
4.31896e-11	1.20121	0.682	0.325	8.63791e-08	3	Gas7
4.48159e-11	0.603438	0.824	0.462	8.96317e-08	3	Hist1h2ab
4.53153e-11	1.36325	0.624	0.194	9.06307e-08	3	Adamts20
4.78956e-11	0.705533	0.753	0.392	9.57911e-08	3	Fbln1
5.21334e-11	1.63504	0.718	0.299	1.04267e-07	3	Gata3
6.26508e-11	0.908377	0.706	0.386	1.25302e-07	3	Col18a1
1.33026e-10	2.18565	0.553	0.114	2.66052e-07	3	Tmod1
1.93269e-10	1.89404	0.718	0.347	3.86537e-07	3	Loxl2
2.50728e-10	2.13347	0.494	0.087	5.01457e-07	3	Megf11
4.50527e-10	1.85508	0.635	0.32	9.01054e-07	3	Cttnbp2
6.21242e-10	2.62107	0.541	0.143	1.24248e-06	3	Rmst
7.46719e-10	1.65226	0.612	0.323	1.49344e-06	3	Itih5
8.78432e-10	0.30941	0.812	0.467	1.75686e-06	3	Hist1h3c
1.29915e-09	1.26985	0.624	0.379	2.5983e-06	3	Vcan
1.5723e-09	2.95877	0.471	0.04	3.1446e-06	3	Tmem100
4.52124e-09	1.48502	0.694	0.365	9.04248e-06	3	Tagln2
6.84231e-09	2.96898	0.553	0.145	1.36846e-05	3	Rnf43
7.04658e-09	0.644319	0.647	0.278	1.40932e-05	3	Cped1
7.77122e-09	1.04953	0.682	0.302	1.55424e-05	3	Lmo7
8.0285e-09	0.772741	0.553	0.327	1.6057e-05	3	C1qtnf7
1.01087e-08	0.856739	0.624	0.277	2.02175e-05	3	Stard13
1.14285e-08	1.34831	0.659	0.198	2.28569e-05	3	Itga6
1.27501e-08	1.69879	0.565	0.252	2.55002e-05	3	Rerg
1.42197e-08	1.57717	0.612	0.291	2.84394e-05	3	Fxyd6
1.75566e-08	0.870301	0.588	0.309	3.51132e-05	3	Cd34
2.69136e-08	1.64206	0.518	0.154	5.38272e-05	3	Bmp3
3.07058e-08	0.721284	0.612	0.303	6.14116e-05	3	Pcolce
3.13863e-08	0.884596	0.647	0.316	6.27726e-05	3	Mical2
3.1881e-08	0.876413	0.435	0.082	6.3762e-05	3	1700084E18Rik
4.68874e-08	0.833378	0.529	0.289	9.37748e-05	3	Ptprb
6.47708e-08	0.667022	0.647	0.4	0.000129542	3	Itpr2
6.57698e-08	1.35706	0.6	0.271	0.00013154	3	Grin3a
8.41914e-08	1.09945	0.435	0.142	0.000168383	3	Nr3c2
9.56194e-08	1.74313	0.553	0.131	0.000191239	3	Ahr
1.2168e-07	1.12241	0.576	0.257	0.00024336	3	Fggy
1.2389e-07	1.5387	0.588	0.208	0.00024778	3	S100a6
1.35537e-07	1.38613	0.424	0.117	0.000271073	3	Tubb3
1.51816e-07	2.06381	0.494	0.124	0.000303632	3	Ildr2
1.55015e-07	0.871081	0.635	0.361	0.000310029	3	Thbs1
1.57339e-07	0.76397	0.694	0.415	0.000314678	3	Sox9
1.58278e-07	1.23313	0.588	0.372	0.000316556	3	Adamts19
1.83056e-07	0.643979	0.659	0.339	0.000366113	3	Bmp6
1.86337e-07	2.05562	0.541	0.213	0.000372673	3	Galnt18
1.89114e-07	0.915409	0.588	0.328	0.000378227	3	Birc5
1.91364e-07	0.841792	0.694	0.367	0.000382728	3	Lum
2.31089e-07	0.535475	0.694	0.309	0.000462178	3	Tsix
2.35889e-07	1.32343	0.529	0.117	0.000471778	3	Gli1
3.15004e-07	0.814901	0.459	0.137	0.000630009	3	Tcaf2
3.34812e-07	1.13392	0.518	0.286	0.000669624	3	Nts
3.41678e-07	0.864486	0.635	0.28	0.000683356	3	Aff3
3.74834e-07	1.11309	0.412	0.168	0.000749668	3	Tppp3
4.12863e-07	0.833105	0.412	0.09	0.000825726	3	Zfp619
4.20662e-07	0.88991	0.565	0.221	0.000841325	3	Stk17b
5.15648e-07	0.94273	0.612	0.331	0.0010313	3	Pdzd2
5.47499e-07	1.92965	0.506	0.12	0.001095	3	Aldh1a7
5.50629e-07	0.899723	0.612	0.355	0.00110126	3	Bgn
5.94617e-07	0.716153	0.659	0.367	0.00118923	3	Bach2
6.13493e-07	0.423357	0.518	0.131	0.00122699	3	Gas6
6.36546e-07	0.57302	0.482	0.337	0.00127309	3	Igf1
7.49969e-07	1.14837	0.635	0.235	0.00149994	3	Mtcl1
8.06917e-07	1.67465	0.482	0.117	0.00161383	3	Pappa2
1.12205e-06	1.5327	0.541	0.226	0.00224409	3	Scx
1.12205e-06	0.946578	0.624	0.328	0.00224409	3	Apoe
1.15043e-06	1.68054	0.518	0.145	0.00230086	3	Galnt14
1.41536e-06	1.08847	0.529	0.152	0.00283071	3	St6galnac5
1.51186e-06	0.40664	0.365	0.072	0.00302373	3	Map10
1.93337e-06	1.16627	0.588	0.249	0.00386674	3	Il1rap
1.94391e-06	1.29948	0.529	0.319	0.00388782	3	Cthrc1
1.94391e-06	1.10667	0.565	0.309	0.00388782	3	Gria3
2.15502e-06	0.992823	0.565	0.255	0.00431005	3	Slc24a2
2.91315e-06	0.913926	0.471	0.132	0.0058263	3	Soga3
3.27612e-06	1.12675	0.518	0.235	0.00655224	3	Sphkap
3.38241e-06	1.46294	0.424	0.098	0.00676481	3	Mfsd2a
3.41856e-06	1.62035	0.553	0.221	0.00683713	3	Opcml
3.68225e-06	0.55489	0.471	0.224	0.00736449	3	Elmo1
3.77107e-06	0.647857	0.576	0.257	0.00754213	3	Mertk
4.06072e-06	0.530931	0.553	0.291	0.00812143	3	Tbc1d4
4.48809e-06	0.994354	0.494	0.148	0.00897618	3	Sh2d4a
4.68064e-06	1.22822	0.565	0.292	0.00936128	3	Acer2
4.75487e-06	0.690249	0.518	0.269	0.00950974	3	Lmcd1
4.86833e-06	1.03787	0.518	0.353	0.00973666	3	Epha3
5.21085e-06	1.65048	0.459	0.129	0.0104217	3	Prune2
5.57638e-06	1.38107	0.435	0.148	0.0111528	3	Fst
5.93548e-06	0.374095	0.4	0.187	0.011871	3	Krt19
6.01303e-06	0.739543	0.541	0.241	0.0120261	3	Matn4
9.33256e-06	1.43964	0.459	0.126	0.0186651	3	Tmem229b
9.33256e-06	0.605607	0.494	0.174	0.0186651	3	Mapt
9.57307e-06	0.307792	0.553	0.389	0.0191461	3	Psd3
9.59744e-06	0.560875	0.459	0.244	0.0191949	3	Pttg1
1.03569e-05	0.609707	0.529	0.308	0.0207137	3	Jun
1.15461e-05	0.493981	0.624	0.407	0.0230922	3	Hecw2
1.21732e-05	1.17337	0.612	0.339	0.0243464	3	Nnat
1.36282e-05	0.906819	0.647	0.375	0.0272565	3	Phactr1
1.45068e-05	0.723695	0.682	0.439	0.0290136	3	Hist1h2ad
1.73061e-05	0.528772	0.412	0.134	0.0346122	3	Xaf1
1.74782e-05	0.908018	0.588	0.361	0.0349565	3	Col1a1
1.95305e-05	0.938626	0.494	0.201	0.0390611	3	Aldh4a1
2.09213e-05	0.353354	0.424	0.185	0.0418425	3	Crtac1
2.19181e-05	0.724068	0.541	0.275	0.0438363	3	Pak3
2.25708e-05	0.624138	0.318	0.1	0.0451417	3	Otof
2.46418e-05	1.15587	0.482	0.218	0.0492836	3	Unc13c
2.9982e-05	0.570554	0.694	0.411	0.059964	3	Xist
3.16123e-05	1.15039	0.482	0.342	0.0632247	3	Negr1
3.40531e-05	2.52906	0.435	0.068	0.0681062	3	Cpxm2
3.69356e-05	1.13425	0.471	0.322	0.0738712	3	Colec12
3.92012e-05	1.015	0.482	0.212	0.0784025	3	Kcnma1
4.11081e-05	0.954329	0.6	0.323	0.0822162	3	Lama2
4.62131e-05	0.528119	0.365	0.112	0.0924262	3	Kank3
4.63769e-05	0.539541	0.435	0.215	0.0927539	3	Trim2
5.01209e-05	0.925879	0.447	0.142	0.100242	3	Tspan11
5.44666e-05	0.652799	0.459	0.098	0.108933	3	Pim2
5.75387e-05	0.305045	0.447	0.146	0.115077	3	Cdh8
6.43289e-05	0.523316	0.588	0.381	0.128658	3	Klhl29
6.76885e-05	0.552172	0.353	0.134	0.135377	3	Ifitm10
7.37159e-05	0.683479	0.553	0.367	0.147432	3	Mfap4
8.24821e-05	0.874906	0.471	0.201	0.164964	3	Abca6
8.79246e-05	1.87961	0.459	0.148	0.175849	3	Mlip
9.01542e-05	1.01335	0.506	0.252	0.180308	3	Rnf182
0.000120076	0.59324	0.624	0.417	0.240152	3	Tuba1b
0.000131586	1.40429	0.506	0.277	0.263173	3	Col12a1
0.000140971	0.850844	0.471	0.37	0.281943	3	Has2
0.000151653	0.741503	0.541	0.355	0.303306	3	Timp3
0.000155037	0.927114	0.471	0.182	0.310074	3	Dkk2
0.000159894	0.53569	0.341	0.115	0.319789	3	Nudt10
0.000162734	1.03366	0.541	0.308	0.325469	3	Epha4
0.000163811	0.7055	0.329	0.086	0.327621	3	Homez
0.0001763	0.965123	0.435	0.165	0.352599	3	Itga2
0.00017727	1.51895	0.447	0.159	0.354541	3	Cd109
0.000198989	1.14231	0.376	0.092	0.397978	3	Npy
0.000204019	0.302429	0.306	0.068	0.408039	3	Lyrm7
0.000207816	1.45152	0.518	0.362	0.415633	3	Garnl3
0.00021008	0.756593	0.506	0.294	0.42016	3	Stat3
0.000216542	0.770202	0.259	0.143	0.433083	3	Tbx5
0.000253911	0.371464	0.6	0.418	0.507823	3	Ube2c
0.000272456	0.428666	0.565	0.325	0.544912	3	Kitl
0.00027362	0.498134	0.482	0.319	0.547239	3	Tubb4b
0.000292263	0.658714	0.318	0.146	0.584526	3	Usp51
0.000302988	0.96842	0.482	0.274	0.605975	3	Scube2
0.000348941	0.498325	0.588	0.414	0.697883	3	Nusap1
0.000385787	1.10956	0.329	0.121	0.771574	3	Scara5
0.000403862	0.816536	0.553	0.4	0.807725	3	Col1a2
0.000403862	0.423575	0.529	0.364	0.807725	3	Fyn
0.000409778	0.90799	0.341	0.174	0.819555	3	Col4a6
0.000411482	0.466466	0.388	0.086	0.822965	3	Myl2
0.000448852	0.489153	0.376	0.152	0.897703	3	Ddit4l
0.000494414	0.431071	0.529	0.358	0.988828	3	Ccna2
0.000518249	1.05327	0.482	0.281	1	3	Grm7
0.000580834	0.434431	0.518	0.353	1	3	Cdk1
0.000583194	0.507278	0.376	0.138	1	3	Cd93
0.000617189	0.85057	0.494	0.418	1	3	Ror2
0.000650398	1.17029	0.459	0.24	1	3	Gria1
0.000651708	0.754978	0.518	0.288	1	3	Junb
0.000689396	0.738179	0.447	0.255	1	3	Tec
0.000730556	0.413781	0.341	0.114	1	3	Slc35g2
0.000781719	0.735194	0.365	0.165	1	3	Lrrn1
0.000850347	0.470587	0.329	0.156	1	3	Fastkd3
0.00086387	0.569409	0.271	0.078	1	3	Nrtn
0.000873291	0.437539	0.4	0.188	1	3	Pced1b
0.000902998	1.78465	0.506	0.212	1	3	Fmod
0.000969025	0.288178	0.353	0.115	1	3	Nog
0.000976631	0.929679	0.518	0.358	1	3	Dkk3
0.00107649	0.637983	0.459	0.174	1	3	Ubash3b
0.0010912	0.314905	0.435	0.286	1	3	Ccnb2
0.00109756	1.18925	0.365	0.146	1	3	Angpt1
0.00109968	0.506088	0.435	0.154	1	3	B4galnt4
0.00114306	0.833567	0.435	0.271	1	3	Efr3b
0.00116758	0.362273	0.459	0.355	1	3	Fgfr2
0.00128283	0.370939	0.4	0.182	1	3	Abca8b
0.00138988	0.511298	0.376	0.227	1	3	Wnk2
0.00154254	0.798128	0.459	0.28	1	3	Frem1
0.00168506	0.305271	0.424	0.264	1	3	Mest
0.00186026	0.753981	0.459	0.308	1	3	Ier2
0.00197034	0.292571	0.529	0.389	1	3	Hmgb2
0.00218046	0.431717	0.271	0.112	1	3	Chadl
0.00236745	0.621683	0.471	0.33	1	3	Tiam2
0.00240656	0.766848	0.471	0.367	1	3	Tmem108
0.0024374	0.29731	0.412	0.272	1	3	Pappa
0.00311556	0.488352	0.318	0.126	1	3	Il17rb
0.00320262	1.00777	0.435	0.17	1	3	Rgs2
0.00335357	1.28071	0.353	0.152	1	3	9330159F19Rik
0.00347406	0.9079	0.294	0.092	1	3	Lgals9
0.00351716	0.575278	0.482	0.345	1	3	Col6a6
0.00367507	0.368216	0.447	0.353	1	3	Meox1
0.00377288	0.983408	0.447	0.272	1	3	Pak7
0.00386631	1.08537	0.353	0.159	1	3	Lypd6
0.00393773	0.877464	0.318	0.142	1	3	Car2
0.00409488	0.532005	0.459	0.288	1	3	Ebpl
0.00447234	1.39873	0.306	0.202	1	3	Cyp26b1
0.00451099	0.73773	0.482	0.322	1	3	Nhs
0.00464866	0.782932	0.353	0.126	1	3	Loxl4
0.00465266	0.405013	0.365	0.188	1	3	Spock2
0.00488102	0.843307	0.306	0.093	1	3	Depdc7
0.00497351	0.933076	0.388	0.243	1	3	Shroom2
0.004982	0.744653	0.424	0.204	1	3	Dpp6
0.00505034	0.291928	0.129	0.316	1	3	Cd46
0.00530525	0.460335	0.435	0.159	1	3	Pex26
0.00535942	0.871254	0.447	0.224	1	3	Klhl11
0.00539121	0.605887	0.282	0.124	1	3	Kcns1
0.00550633	0.558229	0.482	0.327	1	3	Erbb4
0.00568549	0.304184	0.412	0.308	1	3	Cenpa
0.00572387	0.340315	0.518	0.333	1	3	Ccnd1
0.00576249	0.468714	0.306	0.151	1	3	Dhx37
0.00619268	0.711532	0.412	0.187	1	3	Iigp1
0.00736713	0.678347	0.388	0.24	1	3	Wnt5b
0.00753792	0.486222	0.306	0.12	1	3	Txnrd3
0.00764961	0.566042	0.424	0.187	1	3	9130023H24Rik
0.00789032	1.07968	0.376	0.246	1	3	Kcnj15
0.00919838	1.32468	0.435	0.238	1	3	Ier3
0.00928715	0.739697	0.4	0.212	1	3	Tnfaip6
0.00955044	0.785156	0.353	0.115	1	3	Hid1
0.00972707	1.01122	0.424	0.356	1	3	Rspo3
0.00987507	0.376353	0.353	0.199	1	3	Zfp811
2.17424e-33	4.30718	0.89	0.138	4.34848e-30	4	Ebf2
1.05135e-28	2.90213	0.902	0.311	2.10269e-25	4	Nrk
3.10241e-28	3.53581	0.805	0.093	6.20481e-25	4	Abca8a
5.50929e-25	2.22818	0.841	0.319	1.10186e-21	4	Nid1
3.34225e-24	3.49978	0.793	0.218	6.68449e-21	4	Tcf21
3.185e-23	2.74608	0.829	0.265	6.37e-20	4	Pid1
3.3306e-23	2.16429	0.841	0.285	6.6612e-20	4	Col4a1
5.97755e-23	2.24363	0.854	0.246	1.19551e-19	4	Col6a2
6.46069e-23	2.14177	0.866	0.372	1.29214e-19	4	Col3a1
1.15507e-22	2.66171	0.817	0.344	2.31015e-19	4	Slc16a2
5.86636e-22	3.03739	0.744	0.152	1.17327e-18	4	Dlk1
1.60088e-21	2.95609	0.78	0.299	3.20176e-18	4	Itm2a
5.0416e-21	3.45761	0.768	0.159	1.00832e-17	4	Sparcl1
5.8789e-21	2.58103	0.744	0.249	1.17578e-17	4	Akap12
1.14867e-20	2.70648	0.78	0.291	2.29734e-17	4	Raph1
2.01193e-20	2.34303	0.805	0.296	4.02386e-17	4	Col6a1
2.54407e-20	1.99319	0.78	0.265	5.08813e-17	4	Celf2
3.62432e-19	2.08841	0.805	0.276	7.24865e-16	4	Aspn
6.62806e-19	2.44918	0.768	0.17	1.32561e-15	4	Fndc1
8.68423e-19	2.45133	0.756	0.198	1.73685e-15	4	Adamts12
9.22052e-19	1.71704	0.829	0.401	1.8441e-15	4	Postn
1.04972e-18	2.20966	0.78	0.272	2.09944e-15	4	Tenm4
4.80156e-18	1.93044	0.817	0.311	9.60312e-15	4	Ebf1
5.15217e-17	2.37712	0.756	0.235	1.03043e-13	4	Lpar1
7.99419e-17	2.53329	0.744	0.288	1.59884e-13	4	Pcolce
1.47761e-16	2.41918	0.695	0.231	2.95523e-13	4	Mest
1.53384e-16	2.06828	0.756	0.331	3.06767e-13	4	Dcn
2.29934e-16	2.97978	0.695	0.116	4.59868e-13	4	Abca9
2.36424e-16	1.67873	0.805	0.373	4.72848e-13	4	Cacna1d
3.91262e-16	2.66643	0.72	0.266	7.82523e-13	4	Fabp5
5.42153e-16	2.37544	0.744	0.33	1.08431e-12	4	Timp3
1.70405e-15	2.49128	0.695	0.146	3.4081e-12	4	Abca8b
5.91941e-15	2.15751	0.744	0.26	1.18388e-11	4	Itpr1
7.54512e-15	2.25668	0.732	0.245	1.50902e-11	4	Dpt
1.19082e-14	2.83762	0.646	0.266	2.38164e-11	4	Gsn
1.29955e-14	2.60725	0.72	0.262	2.59909e-11	4	Eps8
1.41186e-14	3.48028	0.646	0.15	2.82372e-11	4	Col8a1
3.78487e-14	2.63709	0.683	0.189	7.56974e-11	4	Atp8b1
4.12371e-14	3.30359	0.61	0.102	8.24742e-11	4	Spon2
5.15058e-14	2.8285	0.683	0.252	1.03012e-10	4	Frem1
1.82035e-13	1.94784	0.707	0.282	3.6407e-10	4	Hmga2
1.8433e-13	1.79137	0.732	0.364	3.6866e-10	4	Lum
2.69202e-13	1.76215	0.732	0.317	5.38404e-10	4	Sema5a
4.73842e-13	3.68098	0.61	0.059	9.47684e-10	4	Slc38a5
4.93696e-13	1.5618	0.695	0.303	9.87392e-10	4	Kcnt2
1.25835e-12	1.48469	0.695	0.257	2.51671e-09	4	Sulf1
3.05747e-12	1.6314	0.72	0.351	6.11493e-09	4	Ptn
4.96788e-12	3.49696	0.671	0.121	9.93576e-09	4	Svep1
1.78592e-11	1.404	0.707	0.35	3.57183e-08	4	Pdgfra
2.65461e-11	3.20585	0.573	0.096	5.30922e-08	4	Lpl
2.7994e-11	0.973694	0.744	0.345	5.59879e-08	4	Loxl2
3.68896e-11	1.58321	0.671	0.3	7.37792e-08	4	Slit2
4.05306e-11	1.68017	0.683	0.35	8.10611e-08	4	Ank2
6.16461e-11	0.750306	0.695	0.372	1.23292e-07	4	H19
7.50777e-11	3.09367	0.488	0.074	1.50155e-07	4	1110032F04Rik
8.11573e-11	2.79685	0.585	0.2	1.62315e-07	4	Gpx3
1.35422e-10	1.21387	0.707	0.259	2.70845e-07	4	Sema3d
2.08945e-10	2.35375	0.659	0.229	4.17889e-07	4	Tec
2.68152e-10	2.78575	0.585	0.104	5.36304e-07	4	Tnxb
3.16421e-10	1.75369	0.707	0.35	6.32841e-07	4	Cers6
3.18701e-10	1.0773	0.683	0.378	6.37403e-07	4	Plekhg1
3.46111e-10	1.50598	0.671	0.285	6.92221e-07	4	Pag1
6.72895e-10	1.30675	0.646	0.237	1.34579e-06	4	Tgfbr3
1.07274e-09	1.40929	0.634	0.33	2.14549e-06	4	Ramp2
1.10692e-09	1.85856	0.683	0.313	2.21385e-06	4	Ccnd1
1.1303e-09	1.9445	0.634	0.28	2.2606e-06	4	Rgl1
1.70691e-09	1.6021	0.622	0.31	3.41381e-06	4	Vav3
2.33263e-09	1.65743	0.634	0.265	4.66525e-06	4	Vcam1
4.45639e-09	0.502447	0.098	0.269	8.91277e-06	4	Rapgefl1
1.09558e-08	2.37168	0.561	0.122	2.19116e-05	4	Dock5
1.17358e-08	1.99372	0.61	0.263	2.34716e-05	4	Man1a
1.92301e-08	1.77018	0.671	0.392	3.84603e-05	4	Tuba1a
2.01829e-08	1.97436	0.695	0.376	4.03657e-05	4	Nedd4l
2.31007e-08	1.52128	0.646	0.354	4.62015e-05	4	Col1a1
2.45516e-08	1.24376	0.622	0.354	4.91031e-05	4	Igf2
2.73715e-08	1.58078	0.659	0.406	5.47429e-05	4	Arhgap28
5.39976e-08	2.98757	0.598	0.158	0.000107995	4	Col15a1
5.64129e-08	1.01165	0.646	0.325	0.000112826	4	Adgrl3
9.23437e-08	1.59796	0.646	0.35	0.000184687	4	Fyn
1.0282e-07	2.20303	0.61	0.223	0.000205639	4	Ebf3
1.07324e-07	1.67744	0.659	0.373	0.000214649	4	Itga1
1.19803e-07	1.83774	0.598	0.24	0.000239605	4	Ppfia2
1.30865e-07	1.16327	0.634	0.333	0.00026173	4	Gas7
2.03356e-07	2.74584	0.524	0.11	0.000406712	4	Lepr
2.89028e-07	1.77708	0.61	0.325	0.000578056	4	Grik2
2.93339e-07	2.20211	0.561	0.19	0.000586677	4	Abca6
3.63799e-07	0.700259	0.146	0.286	0.000727598	4	Zfp420
3.63803e-07	1.37473	0.61	0.269	0.000727606	4	Fmn1
3.85799e-07	0.699915	0.524	0.262	0.000771597	4	Clca3a1
7.73064e-07	2.73489	0.488	0.085	0.00154613	4	Irf8
1.09339e-06	2.32519	0.61	0.155	0.00218679	4	Peg10
1.3577e-06	2.37807	0.427	0.118	0.00271541	4	D630003M21Rik
1.39624e-06	2.84425	0.5	0.094	0.00279248	4	Ngf
1.47649e-06	0.901826	0.646	0.319	0.00295297	4	Rhoj
3.06123e-06	1.64032	0.622	0.297	0.00612245	4	Igdcc4
3.60986e-06	0.286822	0.183	0.31	0.00721972	4	Napb
4.47961e-06	2.17221	0.439	0.102	0.00895921	4	Cd40
6.58494e-06	1.35428	0.622	0.308	0.0131699	4	Gpm6b
8.37385e-06	0.471022	0.622	0.41	0.0167477	4	Robo2
8.88887e-06	0.674484	0.573	0.212	0.0177777	4	Pi15
9.85745e-06	2.15644	0.512	0.17	0.0197149	4	Pcsk6
1.07869e-05	1.27063	0.573	0.336	0.0215739	4	Apoe
1.09826e-05	2.11342	0.524	0.138	0.0219652	4	Ndufa4l2
1.2546e-05	0.357818	0.659	0.421	0.025092	4	Sox9
1.50266e-05	1.51009	0.598	0.283	0.0300532	4	Adam12
1.63739e-05	1.41306	0.585	0.334	0.0327478	4	Pcdh9
1.64566e-05	0.715902	0.073	0.257	0.0329132	4	Jakmip2
2.27214e-05	1.98116	0.598	0.229	0.0454427	4	Ablim1
2.74134e-05	0.825153	0.598	0.339	0.0548269	4	Slc12a2
3.28572e-05	1.48786	0.524	0.235	0.0657144	4	Matn2
3.91285e-05	0.604991	0.573	0.334	0.0782571	4	Col6a6
3.94127e-05	0.796189	0.293	0.073	0.0788255	4	Usp27x
3.9988e-05	1.13412	0.549	0.28	0.079976	4	Cdkn1c
5.7916e-05	1.26333	0.5	0.269	0.115832	4	Sytl2
6.48618e-05	0.54704	0.573	0.336	0.129724	4	Fhl1
7.1245e-05	1.00131	0.561	0.336	0.14249	4	Igfbp7
7.2591e-05	1.24594	0.573	0.339	0.145182	4	Serpine2
7.64176e-05	0.533262	0.159	0.254	0.152835	4	Nfatc2
9.3716e-05	0.788317	0.561	0.331	0.187432	4	Itih5
0.000108057	1.96069	0.427	0.127	0.216114	4	Scn7a
0.000116777	0.79548	0.134	0.282	0.233554	4	Sfmbt2
0.000120283	0.928739	0.598	0.276	0.240566	4	Phlda1
0.000121381	0.881155	0.549	0.328	0.242763	4	Meg3
0.000144791	1.14725	0.549	0.217	0.289581	4	Ogn
0.000155225	1.11701	0.561	0.314	0.310451	4	Cd34
0.000194346	0.928133	0.573	0.288	0.388691	4	Crip1
0.000205369	0.666616	0.573	0.382	0.410738	4	Tagln2
0.0002474	0.309061	0.122	0.265	0.494801	4	Mdga2
0.000269274	1.9629	0.524	0.167	0.538548	4	Ubash3b
0.0002824	2.12257	0.354	0.096	0.5648	4	C77080
0.000301915	0.650665	0.146	0.359	0.603831	4	Hdx
0.000362872	1.17313	0.561	0.359	0.725744	4	Mcc
0.00044256	0.252542	0.207	0.288	0.885119	4	Trub2
0.000466351	0.324621	0.671	0.463	0.932703	4	Spc25
0.000467328	1.21852	0.561	0.299	0.934655	4	Sorcs2
0.000486238	0.532858	0.561	0.302	0.972476	4	Rora
0.000512209	1.18913	0.512	0.313	1	4	Tbx18
0.000524041	2.42741	0.451	0.211	1	4	Dab1
0.000637353	1.52751	0.5	0.276	1	4	Plcl2
0.000637353	0.481616	0.134	0.266	1	4	Galnt18
0.000824596	0.396887	0.5	0.308	1	4	Col14a1
0.00100666	1.34549	0.549	0.279	1	4	Nav3
0.00110885	1.55024	0.512	0.293	1	4	Stxbp6
0.00119462	0.346015	0.512	0.269	1	4	Itga8
0.00139557	0.602921	0.5	0.263	1	4	Glcci1
0.00142277	2.2105	0.439	0.108	1	4	Scara5
0.00147865	0.336863	0.183	0.32	1	4	Grm7
0.00152479	2.21882	0.476	0.141	1	4	Kcnn3
0.00168089	0.514015	0.549	0.395	1	4	Stmn1
0.00204183	0.349637	0.183	0.272	1	4	Dgka
0.00255136	0.492972	0.232	0.286	1	4	Leng9
0.00301255	1.90937	0.451	0.135	1	4	Ccdc3
0.00303996	2.67877	0.354	0.161	1	4	Prlr
0.00319776	0.663276	0.537	0.429	1	4	Tuba1b
0.004119	0.662469	0.39	0.276	1	4	Kpna2
0.00423664	2.61892	0.378	0.115	1	4	4930438E09Rik
0.00504357	2.1172	0.439	0.15	1	4	Ndnf
0.00517593	0.394013	0.195	0.279	1	4	Col25a1
0.00532972	0.62369	0.512	0.378	1	4	Sdk2
0.00541279	1.71156	0.5	0.263	1	4	Gng11
0.00591611	1.27961	0.5	0.206	1	4	Fap
0.00605864	0.720105	0.512	0.211	1	4	Thsd4
0.00616233	1.1437	0.5	0.229	1	4	Anxa1
0.00623586	1.00647	0.488	0.241	1	4	Ank
0.00683019	0.988559	0.524	0.311	1	4	Mmp16
0.00765076	1.81963	0.415	0.13	1	4	Medag
0.00806665	0.564785	0.22	0.269	1	4	A830082K12Rik
0.0085446	0.503355	0.476	0.347	1	4	Kctd12
0.00888681	0.470586	0.488	0.37	1	4	Limch1
0.00934693	0.317044	0.244	0.396	1	4	Tmem108
1.20129e-22	2.31592	0.808	0.183	2.40258e-19	5	Syt1
8.78144e-18	2.05908	0.679	0.128	1.75629e-14	5	Cacna2d3
3.81275e-17	1.53414	0.628	0.145	7.6255e-14	5	Luzp2
6.88417e-17	2.1915	0.628	0.128	1.37683e-13	5	Cdh8
2.19151e-16	1.56006	0.641	0.097	4.38302e-13	5	Gabra2
4.5558e-16	1.85448	0.577	0.138	9.11159e-13	5	Gabra1
7.58689e-16	1.11891	0.641	0.123	1.51738e-12	5	Pgr
8.88827e-16	1.61766	0.679	0.218	1.77765e-12	5	Adamts5
3.51986e-15	3.0168	0.692	0.137	7.03972e-12	5	A830018L16Rik
9.53545e-15	0.650673	0.5	0.074	1.90709e-11	5	Stx19
9.62151e-15	0.668452	0.397	0.06	1.9243e-11	5	Gfra4
1.31884e-14	2.05975	0.692	0.211	2.63767e-11	5	Sema3a
1.90779e-14	2.57798	0.615	0.066	3.81558e-11	5	Elavl2
3.00717e-14	0.57335	0.513	0.129	6.01435e-11	5	Zfp873
4.01835e-14	2.02217	0.705	0.12	8.0367e-11	5	Gabrb2
4.91383e-14	1.69639	0.744	0.254	9.82766e-11	5	Sulf1
8.49649e-14	2.01752	0.782	0.332	1.6993e-10	5	Lrp1b
1.17929e-13	1.23999	0.769	0.278	2.35859e-10	5	Tshz2
1.61298e-13	0.551358	0.628	0.129	3.22596e-10	5	Nipal2
2.81737e-13	1.56941	0.679	0.178	5.63475e-10	5	Sorcs3
4.46241e-13	1.93705	0.603	0.206	8.92481e-10	5	Mdga2
6.69763e-13	1.39461	0.667	0.272	1.33953e-09	5	Sorcs1
9.18721e-13	1.03624	0.628	0.152	1.83744e-09	5	Cfh
1.01057e-12	0.639862	0.538	0.163	2.02114e-09	5	Nell2
1.06641e-12	1.1613	0.615	0.22	2.13281e-09	5	Bicd1
1.16307e-12	0.691486	0.821	0.277	2.32613e-09	5	Slit3
2.01657e-12	1.70418	0.615	0.155	4.03314e-09	5	Susd4
2.32123e-12	0.938619	0.615	0.222	4.64246e-09	5	Lonrf2
2.55443e-12	0.616113	0.474	0.166	5.10885e-09	5	Spire2
2.70401e-12	1.57174	0.692	0.238	5.40802e-09	5	Ctnnd2
2.74271e-12	0.692832	0.538	0.18	5.48541e-09	5	Ppp1r26
3.05406e-12	2.41302	0.474	0.103	6.10813e-09	5	Hoxd3
6.40354e-12	0.480805	0.436	0.135	1.28071e-08	5	Car8
6.88056e-12	1.24227	0.782	0.342	1.37611e-08	5	Sfrp2
7.13186e-12	0.412625	0.295	0.032	1.42637e-08	5	Ccdc17
8.78777e-12	0.569783	0.5	0.131	1.75755e-08	5	Zfp784
9.16201e-12	0.661912	0.487	0.138	1.8324e-08	5	Angptl4
1.29214e-11	0.831632	0.628	0.152	2.58428e-08	5	Rgs4
1.4313e-11	0.950606	0.487	0.102	2.86261e-08	5	Phox2b
1.62921e-11	0.924287	0.59	0.232	3.25842e-08	5	Cxcl12
1.90151e-11	0.712342	0.462	0.068	3.80302e-08	5	Inhbb
2.20965e-11	1.20143	0.679	0.186	4.41931e-08	5	Slc26a7
2.32431e-11	0.371617	0.462	0.137	4.64863e-08	5	Smc2os
3.15751e-11	0.616076	0.423	0.146	6.31503e-08	5	Sptb
3.84394e-11	0.479685	0.744	0.258	7.68788e-08	5	Prdm6
4.04853e-11	0.815864	0.526	0.132	8.09706e-08	5	Pcdhb7
4.31383e-11	1.17652	0.59	0.178	8.62765e-08	5	B3galt2
4.38058e-11	1.33953	0.436	0.125	8.76115e-08	5	Elavl4
5.59668e-11	1.9962	0.538	0.154	1.11934e-07	5	Fgf10
6.49367e-11	0.943636	0.756	0.332	1.29873e-07	5	Fbln5
6.79692e-11	1.42787	0.744	0.366	1.35938e-07	5	Aff2
6.9537e-11	1.21081	0.731	0.266	1.39074e-07	5	Slc5a3
7.16825e-11	0.412632	0.769	0.32	1.43365e-07	5	Efna5
9.96235e-11	0.470767	0.346	0.068	1.99247e-07	5	Col19a1
1.0987e-10	1.1359	0.654	0.203	2.1974e-07	5	Bmpr1b
1.31561e-10	1.2829	0.705	0.257	2.63122e-07	5	Macrod2
1.50524e-10	0.888871	0.718	0.375	3.01048e-07	5	Camk1d
1.84072e-10	1.13094	0.474	0.08	3.68143e-07	5	Cntn6
1.87524e-10	1.3519	0.667	0.288	3.75048e-07	5	Lrba
2.00485e-10	0.508602	0.577	0.132	4.00971e-07	5	Hecw1
2.32071e-10	1.06119	0.359	0.075	4.64141e-07	5	Hoxa1
2.35093e-10	1.08481	0.513	0.129	4.70186e-07	5	Ptprt
2.87424e-10	0.823265	0.538	0.157	5.74849e-07	5	2810021J22Rik
3.21511e-10	0.433342	0.487	0.135	6.43022e-07	5	Kcnh8
3.23842e-10	0.785111	0.462	0.138	6.47684e-07	5	Six4
3.29874e-10	1.16048	0.615	0.146	6.59748e-07	5	Nrp2
3.63481e-10	1.62612	0.513	0.109	7.26963e-07	5	Hook1
3.64166e-10	1.66988	0.487	0.18	7.28332e-07	5	Zfp536
4.98239e-10	0.63111	0.59	0.235	9.96479e-07	5	Rcan2
5.60548e-10	0.582267	0.513	0.154	1.1211e-06	5	Pdzk1
5.66669e-10	0.943789	0.5	0.182	1.13334e-06	5	Zfp429
6.37325e-10	1.49048	0.513	0.162	1.27465e-06	5	Kif21a
6.53629e-10	1.85259	0.603	0.208	1.30726e-06	5	Cntn4
6.75191e-10	0.853655	0.756	0.314	1.35038e-06	5	Adgrl3
6.89949e-10	1.11646	0.59	0.188	1.3799e-06	5	Gabrb1
7.01216e-10	0.919365	0.333	0.063	1.40243e-06	5	Adhfe1
7.85337e-10	0.643298	0.551	0.191	1.57067e-06	5	Adgrg2
8.74552e-10	1.05046	0.487	0.103	1.7491e-06	5	Pcdh19
9.6324e-10	0.680156	0.756	0.288	1.92648e-06	5	Rnf24
1.0759e-09	0.276099	0.526	0.183	2.15181e-06	5	Rtn4ip1
1.12289e-09	1.29091	0.5	0.123	2.24579e-06	5	Vat1l
1.18866e-09	0.639171	0.487	0.169	2.37731e-06	5	Prtg
1.25817e-09	1.07047	0.718	0.349	2.51634e-06	5	Pcbp3
1.52328e-09	0.969618	0.705	0.266	3.04657e-06	5	Smyd3
1.57517e-09	0.794181	0.487	0.149	3.15034e-06	5	Kifc2
1.59482e-09	0.669823	0.359	0.134	3.18965e-06	5	Icam1
1.8884e-09	0.438758	0.474	0.158	3.7768e-06	5	Tmem132e
1.88845e-09	1.16785	0.654	0.257	3.7769e-06	5	Dpyd
1.91178e-09	0.857576	0.513	0.134	3.82355e-06	5	Pcdh1
2.04003e-09	0.543522	0.615	0.18	4.08007e-06	5	Pdgfd
2.06515e-09	0.712158	0.423	0.129	4.13029e-06	5	Hr
2.46412e-09	0.43213	0.538	0.186	4.92823e-06	5	Adamts3
2.90219e-09	0.911502	0.41	0.103	5.80438e-06	5	Apba2
3.73681e-09	0.346729	0.333	0.085	7.47361e-06	5	Lancl3
3.76268e-09	0.91839	0.628	0.232	7.52537e-06	5	Adamts9
4.15811e-09	1.15632	0.564	0.155	8.31621e-06	5	Fam184b
4.17948e-09	0.364421	0.538	0.192	8.35896e-06	5	Rapgef3
4.45408e-09	0.419588	0.59	0.218	8.90815e-06	5	Vgll3
4.91122e-09	0.492033	0.449	0.118	9.82245e-06	5	Ccdc24
5.03931e-09	1.22219	0.577	0.162	1.00786e-05	5	Gabre
5.19692e-09	0.656499	0.526	0.214	1.03938e-05	5	Fmn2
5.58357e-09	1.15161	0.564	0.137	1.11671e-05	5	Ribc1
6.64277e-09	1.04945	0.487	0.155	1.32855e-05	5	Rab3c
7.25554e-09	0.744546	0.667	0.269	1.45111e-05	5	Slc24a3
7.58219e-09	1.09055	0.654	0.237	1.51644e-05	5	Esrrg
8.36326e-09	1.75249	0.628	0.308	1.67265e-05	5	Thsd7a
1.15672e-08	1.37648	0.449	0.166	2.31345e-05	5	Zfp612
1.31323e-08	0.585682	0.346	0.106	2.62646e-05	5	Ppfia3
1.52787e-08	0.454887	0.615	0.283	3.05573e-05	5	Fat3
1.53295e-08	0.413053	0.436	0.098	3.06589e-05	5	Rep15
1.68761e-08	0.881145	0.641	0.275	3.37521e-05	5	Gxylt2
1.84516e-08	1.02223	0.551	0.149	3.69031e-05	5	Csmd3
2.63075e-08	0.815327	0.513	0.102	5.2615e-05	5	Epyc
2.70038e-08	0.546208	0.551	0.214	5.40077e-05	5	Klhl11
3.02669e-08	0.648961	0.59	0.248	6.05337e-05	5	Il1rapl1
3.52557e-08	0.443492	0.564	0.257	7.05114e-05	5	Etl4
4.09061e-08	0.335634	0.513	0.122	8.18122e-05	5	Atp10b
4.56372e-08	0.838121	0.346	0.109	9.12744e-05	5	Tmem178b
4.71265e-08	0.955444	0.346	0.091	9.42529e-05	5	Far2
4.90549e-08	1.05683	0.487	0.166	9.81098e-05	5	Dpf1
5.22174e-08	0.395341	0.397	0.122	0.000104435	5	Sytl5
5.29745e-08	0.356917	0.526	0.223	0.000105949	5	Zfp715
5.34e-08	0.619877	0.641	0.251	0.0001068	5	Mtus2
6.63241e-08	0.625359	0.5	0.183	0.000132648	5	Dcc
7.06702e-08	0.826211	0.462	0.209	0.00014134	5	Jakmip2
7.27148e-08	0.847392	0.551	0.169	0.00014543	5	Rnf180
8.02051e-08	0.684511	0.295	0.123	0.00016041	5	Lrrn3
8.48909e-08	0.630282	0.346	0.12	0.000169782	5	Fgf18
9.21321e-08	0.583973	0.526	0.163	0.000184264	5	Khdrbs2
1.14542e-07	0.346967	0.397	0.178	0.000229084	5	Asap3
1.14723e-07	0.347884	0.628	0.252	0.000229447	5	Col24a1
1.29949e-07	1.5889	0.41	0.165	0.000259899	5	Phox2a
1.46214e-07	0.345485	0.641	0.255	0.000292427	5	Pawr
1.60924e-07	0.494461	0.513	0.263	0.000321848	5	Efnb2
1.70109e-07	0.315207	0.551	0.194	0.000340217	5	Ccdc60
1.78703e-07	1.7208	0.41	0.175	0.000357406	5	Cadm2
1.91497e-07	0.75448	0.346	0.118	0.000382994	5	Hid1
1.99594e-07	1.20505	0.449	0.165	0.000399188	5	Macrod1
2.00207e-07	0.99414	0.295	0.14	0.000400414	5	Eya1
2.13176e-07	0.464983	0.5	0.186	0.000426352	5	Atp6v1g2
2.48684e-07	1.23989	0.564	0.246	0.000497369	5	Ppfia2
2.56364e-07	0.568372	0.654	0.366	0.000512727	5	Grip1
2.89435e-07	1.39234	0.603	0.269	0.000578871	5	Grm7
3.0287e-07	0.889966	0.641	0.391	0.00060574	5	Fat4
3.14998e-07	0.586565	0.462	0.142	0.000629997	5	Dync1i1
3.20753e-07	0.793954	0.526	0.228	0.000641506	5	Dgki
3.38632e-07	1.17833	0.615	0.302	0.000677265	5	Tbx18
3.52137e-07	0.296377	0.436	0.16	0.000704274	5	Erap1
3.532e-07	0.708588	0.359	0.171	0.0007064	5	Mbnl3
3.78455e-07	0.326144	0.538	0.275	0.00075691	5	Fam120c
4.25312e-07	0.732506	0.449	0.174	0.000850624	5	Fgf13
4.25922e-07	0.683215	0.308	0.1	0.000851845	5	Gdf6
4.98042e-07	0.571409	0.321	0.114	0.000996084	5	Unc45b
6.5947e-07	0.328981	0.333	0.172	0.00131894	5	Sc5d
6.64318e-07	0.84221	0.41	0.169	0.00132864	5	Slc6a15
7.26542e-07	0.88531	0.372	0.208	0.00145308	5	Stmn4
8.33522e-07	0.608838	0.5	0.245	0.00166704	5	Slc44a5
8.93848e-07	0.920905	0.462	0.226	0.0017877	5	Fam184a
9.10892e-07	0.39106	0.295	0.142	0.00182178	5	Foxl1
9.41829e-07	1.62975	0.487	0.111	0.00188366	5	Mbp
9.65337e-07	0.586151	0.41	0.142	0.00193067	5	Phf11c
1.00676e-06	0.379098	0.692	0.325	0.00201351	5	Sgcd
1.03033e-06	0.320849	0.538	0.18	0.00206067	5	Brinp1
1.04982e-06	0.961295	0.474	0.218	0.00209964	5	Ppm1h
1.05595e-06	0.519466	0.41	0.189	0.00211191	5	Dnaja4
1.10111e-06	0.6554	0.372	0.152	0.00220223	5	Dqx1
1.13007e-06	0.558013	0.487	0.189	0.00226013	5	Grem2
1.19533e-06	0.264627	0.333	0.186	0.00239065	5	Tmem38a
1.33499e-06	1.31777	0.359	0.111	0.00266998	5	Celf3
1.40555e-06	0.688023	0.513	0.252	0.00281109	5	Fgd4
1.74502e-06	0.766297	0.333	0.212	0.00349004	5	Xpc
1.75992e-06	0.518281	0.603	0.342	0.00351984	5	Cpeb3
1.94854e-06	0.869129	0.423	0.205	0.00389708	5	Grm3
2.09371e-06	0.658057	0.359	0.178	0.00418741	5	Masp1
2.33282e-06	0.672613	0.474	0.229	0.00466563	5	Clstn2
2.64552e-06	0.726281	0.526	0.178	0.00529104	5	Fras1
2.64552e-06	0.645986	0.346	0.185	0.00529104	5	Gfra1
2.69012e-06	0.613868	0.385	0.178	0.00538024	5	Abca3
3.32622e-06	0.388721	0.385	0.158	0.00665244	5	Ptpru
3.51981e-06	0.469047	0.564	0.338	0.00703962	5	Fhl1
4.28307e-06	0.558227	0.333	0.105	0.00856614	5	Cptp
4.3957e-06	1.22708	0.449	0.143	0.0087914	5	Tmeff2
4.52344e-06	0.712544	0.333	0.117	0.00904689	5	Zswim3
4.6294e-06	0.346189	0.603	0.254	0.0092588	5	Ralgps1
4.68026e-06	0.324896	0.5	0.303	0.00936051	5	Itga9
5.15432e-06	0.269965	0.295	0.162	0.0103086	5	Greb1
5.36096e-06	0.644422	0.385	0.148	0.0107219	5	Cnksr2
5.79818e-06	0.625217	0.295	0.129	0.0115964	5	Adcyap1r1
6.87775e-06	0.293057	0.397	0.123	0.0137555	5	Stx11
6.94257e-06	1.32033	0.551	0.243	0.0138851	5	Tenm2
7.57261e-06	0.428291	0.256	0.105	0.0151452	5	Fv1
9.1085e-06	0.375042	0.423	0.165	0.018217	5	Omg
9.30329e-06	1.20884	0.397	0.152	0.0186066	5	Angptl7
1.04203e-05	0.484948	0.397	0.186	0.0208406	5	Pcdhga9
1.04753e-05	0.627358	0.513	0.209	0.0209506	5	Dach1
1.06978e-05	0.423757	0.346	0.125	0.0213957	5	Pih1d2
1.20681e-05	1.71533	0.385	0.157	0.0241363	5	Stmn2
1.21949e-05	0.496584	0.423	0.143	0.0243898	5	Cacnb4
1.32903e-05	0.274241	0.577	0.315	0.0265805	5	Gpm6b
1.33249e-05	0.303401	0.449	0.165	0.0266498	5	Rhbdl3
1.33944e-05	1.34128	0.462	0.126	0.0267887	5	Ddc
1.52877e-05	0.52189	0.397	0.197	0.0305754	5	Mme
1.77053e-05	0.862333	0.269	0.125	0.0354106	5	Gabrb3
1.88768e-05	0.586156	0.487	0.226	0.0377537	5	Gm20754
1.89252e-05	1.07926	0.5	0.303	0.0378504	5	C530008M17Rik
1.89252e-05	0.420876	0.487	0.234	0.0378504	5	Enox1
2.05363e-05	0.485878	0.449	0.24	0.0410727	5	Dgka
2.3378e-05	0.839856	0.551	0.374	0.046756	5	Ptn
2.38864e-05	0.571106	0.359	0.143	0.0477728	5	Usp51
2.46843e-05	0.306127	0.577	0.331	0.0493687	5	Osbpl10
2.69954e-05	0.680009	0.256	0.12	0.0539908	5	Ak5
2.71315e-05	0.605213	0.603	0.288	0.0542631	5	Arhgap24
2.83863e-05	1.10203	0.449	0.191	0.0567727	5	Zswim5
2.90697e-05	0.371966	0.321	0.14	0.0581395	5	Sgms2
3.09859e-05	0.688187	0.372	0.195	0.0619718	5	Prph
3.33924e-05	0.764203	0.397	0.137	0.0667848	5	Celsr2
3.49638e-05	1.32798	0.397	0.188	0.0699277	5	Olfm2
3.5357e-05	0.765587	0.436	0.282	0.070714	5	Scube2
3.65605e-05	0.362467	0.385	0.226	0.073121	5	Dclre1c
3.78028e-05	0.469584	0.308	0.154	0.0756056	5	Ddx51
3.78489e-05	0.965365	0.385	0.115	0.0756978	5	Porcn
4.84537e-05	0.627586	0.346	0.105	0.0969074	5	Hoxa5
5.02597e-05	0.526503	0.436	0.298	0.100519	5	Kcnq1ot1
5.02597e-05	0.49949	0.538	0.335	0.100519	5	Prr16
5.08127e-05	0.962569	0.333	0.115	0.101625	5	Dusp28
5.99975e-05	0.250061	0.577	0.326	0.119995	5	Col11a1
6.06527e-05	0.353533	0.397	0.209	0.121305	5	Zfp382
6.67031e-05	1.1235	0.308	0.125	0.133406	5	Bche
6.73467e-05	0.757802	0.513	0.205	0.134693	5	Dpf3
7.41137e-05	0.680211	0.359	0.123	0.148227	5	Btc
7.81047e-05	1.20517	0.577	0.431	0.156209	5	Trps1
9.41754e-05	1.13323	0.397	0.258	0.188351	5	Kctd8
9.46202e-05	0.523753	0.564	0.329	0.18924	5	Magi2
9.48434e-05	0.731703	0.526	0.298	0.189687	5	Gm16070
9.59666e-05	0.298075	0.641	0.405	0.191933	5	Hist1h4d
9.92945e-05	0.742894	0.41	0.212	0.198589	5	Pcdh20
0.000105662	0.533331	0.564	0.388	0.211324	5	Phactr1
0.000106656	0.400743	0.359	0.185	0.213312	5	Pamr1
0.000108416	0.853303	0.397	0.2	0.216833	5	Ddx43
0.000117364	1.35567	0.436	0.185	0.234729	5	Cux2
0.0001273	0.847878	0.538	0.395	0.2546	5	Gphn
0.000134256	1.22271	0.397	0.132	0.268511	5	Spock3
0.000134566	0.690036	0.526	0.337	0.269132	5	Flrt2
0.000151495	0.550954	0.513	0.315	0.30299	5	Gm11149
0.00015167	0.262691	0.526	0.315	0.30334	5	Ppargc1a
0.000157332	0.487856	0.474	0.212	0.314663	5	Sntg2
0.000161339	1.17916	0.551	0.325	0.322677	5	Tmem26
0.000167911	0.632853	0.59	0.403	0.335823	5	Plag1
0.000181616	0.463213	0.577	0.383	0.363231	5	Unc5c
0.000202206	0.943422	0.346	0.138	0.404412	5	Slc16a13
0.000206584	0.566204	0.551	0.274	0.413168	5	Egfr
0.000227516	0.610976	0.5	0.315	0.455032	5	Mmp16
0.000257768	1.12715	0.333	0.18	0.515536	5	Hs3st3a1
0.000267673	0.535134	0.513	0.354	0.535347	5	Fhod3
0.000279166	1.65489	0.487	0.211	0.558331	5	Plcxd3
0.000298914	0.53716	0.423	0.206	0.597828	5	Dpp6
0.000325618	0.420201	0.513	0.232	0.651237	5	Erc2
0.000345397	0.537481	0.397	0.205	0.690794	5	Klf8
0.0003655	0.820943	0.423	0.275	0.731	5	Arhgef3
0.000375957	0.527456	0.474	0.295	0.751914	5	Plxna2
0.000397715	0.346466	0.5	0.358	0.79543	5	Tmtc2
0.000415691	0.26301	0.359	0.177	0.831383	5	Mon1a
0.000519741	0.776956	0.397	0.215	1	5	Syt14
0.000538805	0.255851	0.359	0.109	1	5	Clec11a
0.000542237	0.642425	0.385	0.191	1	5	Mapt
0.000554992	0.528074	0.41	0.212	1	5	Nrg1
0.000582572	0.634438	0.462	0.295	1	5	Nts
0.00059246	0.671081	0.372	0.077	1	5	C530005A16Rik
0.000626989	0.709461	0.423	0.202	1	5	Lmln
0.000639585	0.593582	0.321	0.142	1	5	Cecr2
0.000710565	1.28615	0.295	0.152	1	5	Isl1
0.000736812	0.356709	0.308	0.294	1	5	Zbtb9
0.000880353	0.251591	0.295	0.185	1	5	St6galnac5
0.000996713	0.612194	0.436	0.243	1	5	Ica1
0.00110476	0.362502	0.436	0.286	1	5	Man1a
0.00122964	0.593979	0.256	0.174	1	5	4930563F08Rik
0.00130141	0.526063	0.269	0.1	1	5	Rspo2
0.0013527	0.638312	0.538	0.375	1	5	Wdr89
0.00140308	0.475064	0.551	0.335	1	5	Galnt7
0.0014254	0.314484	0.256	0.1	1	5	Homer2
0.00145948	0.76063	0.538	0.294	1	5	Slc24a5
0.001515	0.581141	0.449	0.308	1	5	Lsamp
0.00160977	0.632065	0.449	0.352	1	5	Pcdh9
0.00173001	0.682079	0.295	0.166	1	5	Col23a1
0.00181236	0.611416	0.551	0.338	1	5	Epha5
0.00196898	1.17055	0.372	0.086	1	5	Shisa3
0.00197277	0.303253	0.385	0.237	1	5	Skap2
0.00204206	1.17281	0.346	0.208	1	5	Lrrc7
0.00206961	0.466368	0.308	0.277	1	5	Pdgfc
0.00222519	0.798911	0.538	0.368	1	5	Lars2
0.00224644	0.705656	0.333	0.222	1	5	4931428F04Rik
0.00228732	1.22812	0.333	0.162	1	5	Dlx5
0.00234661	0.752547	0.359	0.177	1	5	Tdrkh
0.00263733	0.602228	0.449	0.252	1	5	Bora
0.00377253	0.483117	0.449	0.277	1	5	Dock10
0.00388704	0.333022	0.321	0.178	1	5	Stag3
0.00414446	0.530015	0.308	0.178	1	5	Cxadr
0.00441322	0.357572	0.5	0.351	1	5	Tgfbi
0.00519661	0.352637	0.436	0.318	1	5	Nuak1
0.00593625	0.372938	0.423	0.195	1	5	Tmem220
0.0059673	0.439384	0.487	0.394	1	5	Plcb4
0.00675785	0.261351	0.308	0.228	1	5	Sntg1
0.00755108	0.544972	0.628	0.451	1	5	Malat1
0.00765425	0.746839	0.269	0.168	1	5	A230072C01Rik
0.00777187	1.88386	0.295	0.102	1	5	Rundc3a
0.00914587	0.809446	0.449	0.314	1	5	Col9a1
3.38696e-14	2.92893	1	0.366	6.77391e-11	6	Col1a1
7.16265e-14	3.6653	0.96	0.172	1.43253e-10	6	Cdh12
2.54598e-13	2.90025	0.96	0.287	5.09197e-10	6	Cdkn1c
2.89829e-13	3.24629	1	0.397	5.79658e-10	6	Col1a2
7.325e-13	3.78033	0.88	0.125	1.465e-09	6	Lgi2
1.66507e-12	2.95592	0.96	0.292	3.33013e-09	6	Col6a2
2.72382e-12	2.22249	1	0.307	5.44764e-09	6	Tshz2
4.08571e-12	2.68046	0.92	0.252	8.17143e-09	6	Adamts9
6.90223e-12	2.76552	0.92	0.393	1.38045e-08	6	Sparc
8.68537e-12	2.81409	0.96	0.307	1.73707e-08	6	Col14a1
1.06999e-11	2.38697	0.96	0.243	2.13998e-08	6	Matn2
1.129e-11	2.60828	1	0.33	2.25801e-08	6	Col6a1
1.2652e-11	2.67053	0.92	0.23	2.53039e-08	6	Ogn
1.43649e-11	3.13307	0.88	0.297	2.87298e-08	6	Plagl1
2.39503e-11	2.38378	0.96	0.408	4.79005e-08	6	Col3a1
2.95718e-11	2.72779	0.92	0.213	5.91436e-08	6	Fndc1
3.03595e-11	3.12275	0.88	0.183	6.0719e-08	6	Twist2
3.19971e-11	2.82741	0.92	0.193	6.39941e-08	6	Dlk1
3.35006e-11	2.90638	0.96	0.337	6.70012e-08	6	Ccdc80
4.67475e-11	2.50576	0.92	0.263	9.3495e-08	6	Ackr3
7.4522e-11	2.07192	0.96	0.282	1.49044e-07	6	Akap12
1.33445e-10	2.40172	0.96	0.259	2.66889e-07	6	Mest
1.96363e-10	3.81679	0.8	0.085	3.92726e-07	6	Agtr2
2.15817e-10	2.64062	0.92	0.321	4.31634e-07	6	Cd34
2.37149e-10	3.33066	0.8	0.105	4.74298e-07	6	Tmem158
3.30327e-10	2.35915	0.92	0.248	6.60654e-07	6	Ablim1
3.71763e-10	2.51519	0.88	0.302	7.43527e-07	6	Cped1
3.90691e-10	4.02752	0.76	0.102	7.81382e-07	6	Mfap5
4.15677e-10	2.62931	0.88	0.23	8.31354e-07	6	S100a6
4.26102e-10	3.55378	0.84	0.094	8.52204e-07	6	Gdf10
5.45435e-10	2.40385	0.8	0.252	1.09087e-06	6	Cxcl12
5.65942e-10	2.53119	0.88	0.371	1.13188e-06	6	Mfap4
5.65942e-10	2.3327	0.84	0.29	1.13188e-06	6	Gsn
6.43817e-10	1.8677	0.88	0.252	1.28763e-06	6	Ntrk3
1.08044e-09	2.46775	0.88	0.279	2.16088e-06	6	Dpt
1.295e-09	1.93331	0.88	0.246	2.59e-06	6	Adamts5
1.35075e-09	2.41563	0.88	0.181	2.70149e-06	6	Vldlr
1.40459e-09	2.86005	0.84	0.212	2.80918e-06	6	Klhl8
1.42587e-09	3.64955	0.8	0.121	2.85174e-06	6	Fmo1
1.77983e-09	2.28631	0.88	0.343	3.55965e-06	6	Col6a6
3.29717e-09	3.0593	0.84	0.154	6.59434e-06	6	Tnfrsf11b
4.21755e-09	2.01603	0.8	0.151	8.4351e-06	6	Abca8a
5.23204e-09	1.84616	0.88	0.294	1.04641e-05	6	Lox
5.90962e-09	1.35053	0.96	0.273	1.18192e-05	6	Pcdh7
6.90722e-09	2.17942	0.88	0.303	1.38144e-05	6	Celf2
1.02008e-08	2.78437	0.88	0.36	2.04016e-05	6	Nid1
1.24473e-08	1.62734	0.8	0.223	2.48947e-05	6	Gpx3
1.28052e-08	2.5231	0.88	0.367	2.56104e-05	6	Cst3
1.30986e-08	2.02023	0.76	0.22	2.61973e-05	6	Fap
1.44204e-08	2.69544	0.8	0.421	2.88408e-05	6	Fbln1
1.50015e-08	2.47043	0.72	0.095	3.0003e-05	6	Shisa3
1.80618e-08	1.97775	0.84	0.346	3.61237e-05	6	Fhl1
2.42857e-08	3.33854	0.64	0.075	4.85715e-05	6	Pi16
2.48319e-08	2.26586	0.84	0.317	4.96639e-05	6	Thbs2
5.53682e-08	2.23794	0.8	0.165	0.000110736	6	Pgm5
6.30522e-08	2.58179	0.6	0.161	0.000126104	6	Gas6
6.33938e-08	2.3622	0.72	0.201	0.000126788	6	Smoc2
7.77911e-08	2.94163	0.76	0.166	0.000155582	6	Cd55
7.82098e-08	3.30066	0.76	0.081	0.00015642	6	Gabra3
7.99066e-08	1.43528	0.84	0.263	0.000159813	6	Tgfbr3
1.13024e-07	2.80188	0.72	0.145	0.000226047	6	Gli1
1.19176e-07	2.42844	0.72	0.171	0.000238352	6	Penk
1.25983e-07	2.45923	0.68	0.183	0.000251966	6	Abca3
1.38906e-07	2.4376	0.8	0.212	0.000277811	6	Maf
1.63483e-07	2.29246	0.84	0.22	0.000326967	6	Klf4
2.0894e-07	2.37119	0.76	0.138	0.000417881	6	Ntn1
2.16679e-07	2.83049	0.68	0.121	0.000433358	6	Thbd
2.36643e-07	2.8104	0.6	0.152	0.000473287	6	Cpz
2.63767e-07	1.5406	0.92	0.36	0.000527534	6	Dcn
2.7629e-07	2.31802	0.8	0.323	0.000552579	6	Pcolce
2.79149e-07	2.28371	0.68	0.097	0.000558299	6	Cyp1b1
3.01528e-07	2.15951	0.84	0.296	0.000603055	6	Gxylt2
3.7e-07	2.81672	0.68	0.139	0.00074	6	Tnxb
4.18046e-07	3.15897	0.72	0.158	0.000836092	6	Tspan11
6.19413e-07	1.74765	0.8	0.3	0.00123883	6	Stxbp6
8.26801e-07	3.14232	0.6	0.081	0.0016536	6	Sod3
9.12732e-07	0.84987	0.84	0.296	0.00182546	6	Ror1
9.68351e-07	1.52837	0.72	0.24	0.0019367	6	Wnt5b
1.28648e-06	1.63649	0.8	0.289	0.00257295	6	Phactr2
1.58494e-06	2.47305	0.64	0.127	0.00316988	6	Pcdh19
1.77939e-06	1.1739	0.76	0.245	0.00355877	6	Bicd1
1.78797e-06	1.53423	0.68	0.28	0.00357593	6	Lpar1
1.94006e-06	2.19863	0.76	0.287	0.00388012	6	Egfr
2.47458e-06	2.4484	0.64	0.181	0.00494916	6	Tppp3
2.68228e-06	1.00335	0.8	0.319	0.00536456	6	Slit3
3.20874e-06	2.12517	0.68	0.216	0.00641749	6	Angpt2
4.09189e-06	2.34922	0.8	0.302	0.00818377	6	Adam12
4.18813e-06	0.906554	0.64	0.239	0.00837626	6	Skap2
4.26667e-06	0.964693	0.44	0.084	0.00853334	6	Lrrc24
6.22524e-06	1.62609	0.76	0.222	0.0124505	6	Ntrk2
6.41278e-06	2.09514	0.6	0.092	0.0128256	6	Il4ra
7.81457e-06	0.871668	0.8	0.302	0.0156291	6	Eln
7.99331e-06	2.27751	0.68	0.158	0.0159866	6	Fgd5
8.17594e-06	1.64433	0.68	0.144	0.0163519	6	Zbtb16
9.63524e-06	2.03253	0.56	0.118	0.0192705	6	Chrd
9.8757e-06	1.39045	0.72	0.252	0.0197514	6	Hist1h1c
1.02356e-05	1.50656	0.8	0.287	0.0204713	6	Nr2f2
1.03275e-05	2.15097	0.6	0.108	0.0206551	6	Il17rc
1.03738e-05	1.233	0.84	0.339	0.0207476	6	Lama2
1.47241e-05	0.97997	0.68	0.24	0.0294481	6	Fam129a
1.57955e-05	1.26816	0.64	0.158	0.031591	6	Hectd3
1.75431e-05	1.32277	0.68	0.35	0.0350862	6	Kctd12
1.81655e-05	1.89764	0.72	0.373	0.036331	6	Bgn
2.07818e-05	1.40867	0.76	0.31	0.0415636	6	Adamts1
2.27535e-05	0.654893	0.6	0.128	0.045507	6	Gpr85
2.30498e-05	2.38354	0.64	0.239	0.0460995	6	Pi15
2.41662e-05	1.44764	0.76	0.284	0.0483324	6	Sema3c
2.71288e-05	1.80332	0.72	0.307	0.0542577	6	Fibin
2.8071e-05	0.950748	0.88	0.327	0.056142	6	Alcam
2.8071e-05	0.917912	0.6	0.212	0.056142	6	Klf2
3.35496e-05	2.24484	0.76	0.296	0.0670992	6	Mid1
3.45561e-05	1.78865	0.72	0.222	0.0691123	6	Bace2
4.07103e-05	1.52439	0.64	0.181	0.0814205	6	Bmp3
4.26255e-05	1.7508	0.48	0.061	0.085251	6	Tfpi2
5.56951e-05	1.94245	0.56	0.118	0.11139	6	Pdk4
5.58102e-05	1.55316	0.64	0.309	0.11162	6	Crip1
5.81533e-05	1.0818	0.44	0.158	0.116307	6	Lpxn
6.2097e-05	1.15183	0.72	0.314	0.124194	6	Pid1
6.2097e-05	1.06969	0.72	0.175	0.124194	6	Col4a6
6.2097e-05	0.279558	0.72	0.26	0.124194	6	Jag1
6.41623e-05	1.17914	0.48	0.083	0.128325	6	Gfra4
6.44252e-05	2.05483	0.72	0.34	0.12885	6	Meg3
8.18593e-05	1.47635	0.56	0.139	0.163719	6	Fdxr
9.65076e-05	1.48031	0.68	0.252	0.193015	6	Ebf3
9.72817e-05	2.88462	0.56	0.067	0.194563	6	Wfdc1
9.76713e-05	1.07074	0.6	0.282	0.195343	6	Col24a1
0.000100438	0.575278	0.76	0.333	0.200877	6	Col4a1
0.000102052	1.8206	0.56	0.139	0.204105	6	Col5a3
0.000108756	2.26434	0.64	0.108	0.217512	6	Tbxa2r
0.000137248	0.389467	0.68	0.297	0.274496	6	Prdm6
0.000143845	1.34628	0.56	0.121	0.287689	6	Clec11a
0.000162925	2.08698	0.6	0.161	0.325851	6	Dync1i1
0.000164831	0.953254	0.8	0.326	0.329663	6	Slit2
0.000201391	1.1345	0.68	0.195	0.402783	6	Abcc9
0.000214092	1.16954	0.76	0.393	0.428184	6	Lum
0.000220721	0.546744	0.6	0.313	0.441442	6	Prss35
0.000222408	1.03242	0.48	0.128	0.444816	6	P2rx7
0.000229278	1.31099	0.68	0.168	0.458556	6	Kcnip4
0.000249208	1.19302	0.48	0.111	0.498416	6	Efnb3
0.000253006	2.05829	0.56	0.165	0.506012	6	Angptl7
0.000257826	0.461958	0.64	0.182	0.515651	6	Prkaa2
0.000268733	2.23725	0.52	0.142	0.537466	6	Gabra2
0.000343166	1.55168	0.48	0.118	0.686333	6	C530044C16Rik
0.000352827	1.06104	0.68	0.339	0.705655	6	Boc
0.000381239	1.34366	0.56	0.134	0.762479	6	Dach2
0.000384054	1.26197	0.52	0.102	0.768108	6	Homer2
0.000434975	0.767994	0.36	0.195	0.869949	6	Cenpm
0.000474641	1.95065	0.72	0.201	0.949282	6	Brinp1
0.00051953	1.37626	0.64	0.262	1	6	Igfbp5
0.000576548	0.988957	0.6	0.249	1	6	Adamts12
0.000578614	1.2255	0.64	0.346	1	6	Rhoj
0.000621417	0.751121	0.64	0.277	1	6	Etl4
0.000628086	1.84652	0.64	0.168	1	6	Slitrk4
0.000643906	1.94548	0.56	0.148	1	6	Medag
0.000646196	1.34005	0.52	0.084	1	6	Tbx15
0.000723604	0.731981	0.44	0.128	1	6	Tigar
0.000764118	1.03627	0.56	0.137	1	6	Setmar
0.000838297	0.965649	0.6	0.122	1	6	Gpr155
0.000856	1.11276	0.6	0.209	1	6	Ebf2
0.000864978	1.32364	0.64	0.374	1	6	Mgp
0.000864978	1.23438	0.76	0.317	1	6	Thsd7b
0.000898652	0.463016	0.6	0.422	1	6	Nuf2
0.000911195	1.51385	0.56	0.361	1	6	Ebf1
0.000917527	1.61067	0.64	0.198	1	6	Chrm2
0.000927102	0.951374	0.48	0.152	1	6	Pcdhb11
0.000989925	0.908792	0.48	0.129	1	6	Dcaf12l1
0.00107124	0.655481	0.48	0.137	1	6	Bex1
0.00107491	1.67401	0.68	0.189	1	6	Gabre
0.00110849	0.490611	0.64	0.357	1	6	Gas7
0.00111227	2.05866	0.44	0.115	1	6	Dnajc28
0.00117058	0.957511	0.64	0.329	1	6	Colec12
0.00118056	0.631634	0.4	0.084	1	6	Xrcc3
0.0011866	0.684743	0.52	0.139	1	6	D630003M21Rik
0.00136514	1.38975	0.56	0.158	1	6	Itpr3
0.00137897	1.37288	0.52	0.155	1	6	Adam8
0.00139527	1.52927	0.52	0.132	1	6	Scara5
0.0014141	0.333664	0.64	0.235	1	6	Gm10125
0.0015068	1.13837	0.44	0.11	1	6	Fam71a
0.00157867	0.692377	0.64	0.404	1	6	Stmn1
0.00158918	0.985732	0.6	0.192	1	6	Mpzl2
0.00160508	0.451406	0.64	0.294	1	6	Sulf1
0.00166464	0.501961	0.56	0.294	1	6	Ccnb2
0.00167016	1.98574	0.52	0.121	1	6	B130024G19Rik
0.0016868	1.38497	0.64	0.201	1	6	Fras1
0.00176651	1.48909	0.44	0.07	1	6	Neto1
0.00182554	0.69414	0.48	0.128	1	6	Gabrb3
0.00186183	0.398155	0.6	0.324	1	6	Igdcc4
0.00188022	1.11333	0.56	0.191	1	6	Rgs4
0.00188639	1.17894	0.52	0.129	1	6	Mr1
0.0019364	1.13219	0.4	0.121	1	6	Aass
0.00216983	1.2867	0.6	0.356	1	6	Sgcd
0.00234452	0.961353	0.56	0.24	1	6	Bmpr1b
0.00241328	1.76007	0.56	0.165	1	6	Fxyd7
0.00247595	1.73587	0.56	0.219	1	6	Zim1
0.00260575	1.04237	0.52	0.156	1	6	Mst1r
0.00296733	1.19551	0.64	0.324	1	6	Aspn
0.00304301	0.38197	0.64	0.297	1	6	Rassf8
0.00306219	1.7448	0.32	0.09	1	6	Slc44a3
0.00314994	1.20898	0.64	0.303	1	6	Junb
0.00355722	1.34353	0.48	0.105	1	6	Rspo2
0.00359045	0.903039	0.6	0.326	1	6	Tspan18
0.00362397	3.07396	0.56	0.112	1	6	Osr2
0.00376089	0.353304	0.48	0.124	1	6	Unc45b
0.00385477	1.04227	0.44	0.211	1	6	Dner
0.00386665	0.795318	0.72	0.364	1	6	Dkk3
0.00389052	1.12559	0.36	0.219	1	6	Cdh18
0.00389648	1.79841	0.36	0.067	1	6	C1ra
0.00398733	1.5535	0.52	0.112	1	6	Nudt11
0.00405514	0.696339	0.48	0.152	1	6	AI427809
0.00406136	1.5538	0.28	0.11	1	6	Fbxl8
0.00406137	0.385102	0.64	0.381	1	6	Pdgfra
0.00425194	1.55071	0.52	0.144	1	6	Abcb6
0.00437678	0.576387	0.48	0.139	1	6	Trmt61a
0.00447772	1.09255	0.44	0.25	1	6	Plxdc2
0.00457378	0.985532	0.48	0.131	1	6	Tlcd2
0.00458765	1.79227	0.4	0.097	1	6	Dnah1
0.00464355	1.10893	0.44	0.118	1	6	Zfp128
0.00465763	0.581083	0.6	0.394	1	6	Mki67
0.00480046	1.26329	0.44	0.114	1	6	Ptger3
0.00499204	0.661013	0.52	0.138	1	6	Mapk13
0.00505237	1.3261	0.52	0.144	1	6	Gm527
0.00508279	0.47578	0.6	0.286	1	6	Chsy3
0.00530034	0.772258	0.36	0.108	1	6	Sbspon
0.00551801	0.497529	0.44	0.129	1	6	AB124611
0.00588144	0.93508	0.44	0.114	1	6	Zfp54
0.00622042	1.50474	0.52	0.229	1	6	Nhsl2
0.00628471	1.12243	0.4	0.122	1	6	Atp6v0e2
0.00636833	0.292479	0.4	0.095	1	6	Hoxa1
0.00644347	1.28934	0.44	0.151	1	6	Slc40a1
0.00650034	0.517222	0.6	0.248	1	6	Mgmt
0.00673238	1.3401	0.56	0.249	1	6	Anxa1
0.00682126	0.836002	0.4	0.145	1	6	Adora2b
0.00707385	0.741956	0.6	0.243	1	6	Glis3
0.00739862	1.34712	0.4	0.124	1	6	Gbp7
0.00764822	1.61426	0.6	0.145	1	6	Spock3
0.00789397	0.936614	0.68	0.286	1	6	Dpyd
0.00798504	0.842251	0.4	0.139	1	6	1110020A21Rik
0.00803095	0.505633	0.52	0.189	1	6	Dpf1
0.00807708	1.96542	0.36	0.156	1	6	Parp3
0.00812347	0.8199	0.36	0.1	1	6	1700019D03Rik
0.0081935	0.596089	0.48	0.147	1	6	Elavl4
0.00862495	0.34313	0.44	0.122	1	6	Thnsl2
0.0086742	1.07339	0.56	0.346	1	6	Itm2a
0.0088483	1.48827	0.52	0.169	1	6	Ndufa4l2
0.00889862	0.497614	0.72	0.233	1	6	Syt1
0.00938951	0.544411	0.36	0.135	1	6	Phox2b
0.00949588	0.326395	0.4	0.134	1	6	Hoxd3
0.00968462	0.94761	0.44	0.172	1	6	Fst
0.00973916	0.682649	0.52	0.306	1	6	Kcnq1ot1
4.2265e-13	5.47461	1	0.092	8.45299e-10	7	Sox10
7.89392e-13	4.86803	1	0.142	1.57878e-09	7	Plp1
9.23707e-13	4.84687	1	0.096	1.84741e-09	7	Rab38
7.75838e-12	3.78285	1	0.207	1.55168e-08	7	Fbxo7
1.2164e-11	4.78984	0.944	0.137	2.4328e-08	7	Ednrb
1.41183e-11	4.09974	0.889	0.048	2.82366e-08	7	Tyr
1.53869e-11	3.56348	1	0.175	3.07739e-08	7	Cadm1
2.59024e-11	3.34814	1	0.179	5.18047e-08	7	Ldb2
4.68e-11	3.12765	1	0.334	9.36e-08	7	Mitf
8.39273e-11	3.48157	0.944	0.123	1.67855e-07	7	Kit
1.10824e-10	4.21292	0.944	0.128	2.21649e-07	7	Cdh19
1.15052e-10	2.85898	1	0.29	2.30104e-07	7	Fmn1
1.4393e-10	3.02747	1	0.341	2.8786e-07	7	Grik2
1.49387e-10	3.13624	1	0.258	2.98775e-07	7	Matn4
2.43427e-10	3.84733	0.889	0.092	4.86853e-07	7	Bhlhe41
2.92462e-10	3.4009	0.889	0.165	5.84923e-07	7	Erbb3
3.01155e-10	3.29201	0.944	0.124	6.02309e-07	7	Nrcam
6.00244e-10	3.03271	0.944	0.279	1.20049e-06	7	Ptprj
1.40145e-09	2.12263	0.944	0.377	2.80291e-06	7	Basp1
1.57963e-09	3.02453	0.944	0.301	3.15925e-06	7	Stard13
1.76738e-09	3.9632	0.889	0.055	3.53475e-06	7	Mlph
1.93577e-09	2.45258	0.833	0.085	3.87154e-06	7	Tmem177
1.94936e-09	3.17291	0.944	0.296	3.89871e-06	7	Phlda1
1.94936e-09	2.72066	0.944	0.176	3.89871e-06	7	Mt1
1.9768e-09	3.06051	0.778	0.115	3.9536e-06	7	Slc7a8
2.87788e-09	2.07348	1	0.304	5.75576e-06	7	Aff3
3.37335e-09	2.11776	1	0.262	6.7467e-06	7	Fgd4
3.49157e-09	3.17241	0.889	0.203	6.98314e-06	7	Deptor
5.15935e-09	3.1084	0.778	0.169	1.03187e-05	7	Fabp7
5.26588e-09	2.81623	0.778	0.127	1.05318e-05	7	Ryr3
6.07385e-09	2.99011	0.889	0.154	1.21477e-05	7	Dock5
6.24087e-09	2.80493	0.944	0.304	1.24817e-05	7	Slc24a5
1.00672e-08	2.91818	0.778	0.161	2.01343e-05	7	Pparg
1.02028e-08	3.47861	0.833	0.08	2.04055e-05	7	Klf5
1.20547e-08	3.29254	0.722	0.173	2.41094e-05	7	Pde8a
1.28836e-08	3.06342	0.833	0.139	2.57672e-05	7	Eya1
1.42317e-08	2.7357	0.722	0.134	2.84633e-05	7	Gata2
1.58205e-08	1.98459	0.722	0.077	3.1641e-05	7	Msx2
1.59253e-08	2.20169	1	0.277	3.18507e-05	7	Abca1
2.96539e-08	3.13412	0.889	0.142	5.93078e-05	7	Tmem51
6.35854e-08	2.22813	0.889	0.263	0.000127171	7	Tnik
9.8156e-08	2.29987	0.944	0.366	0.000196312	7	Mboat2
1.19067e-07	1.93682	0.944	0.348	0.000238134	7	Apoe
1.25127e-07	1.21611	0.944	0.369	0.000250254	7	Arl6ip1
1.28268e-07	2.17841	0.833	0.203	0.000256536	7	Mme
1.58229e-07	2.25812	0.833	0.192	0.000316459	7	Col15a1
1.6723e-07	1.25138	0.778	0.152	0.00033446	7	Scn3a
1.75645e-07	2.4982	0.722	0.128	0.000351289	7	Mr1
1.91361e-07	1.97797	0.778	0.09	0.000382722	7	Fam174b
2.03418e-07	2.88997	0.778	0.092	0.000406837	7	Dusp18
2.42669e-07	2.37442	0.833	0.093	0.000485337	7	Enpp2
2.59393e-07	2.53825	0.889	0.282	0.000518785	7	Chsy3
3.02549e-07	1.76876	0.722	0.111	0.000605097	7	Syt7
3.20344e-07	1.4548	0.889	0.354	0.000640688	7	Dbi
3.48413e-07	1.47802	0.778	0.18	0.000696825	7	Macrod1
3.92664e-07	2.32406	0.667	0.13	0.000785327	7	Nog
7.55558e-07	2.72908	0.722	0.182	0.00151112	7	Slc6a15
9.58493e-07	2.31065	0.889	0.292	0.00191699	7	Pde1c
9.69628e-07	1.91725	0.889	0.308	0.00193926	7	Celf2
9.89399e-07	2.73362	0.722	0.142	0.0019788	7	Nceh1
1.08181e-06	3.31466	0.667	0.101	0.00216363	7	Cadm4
1.11335e-06	2.44319	0.722	0.124	0.00222669	7	Tigar
1.11654e-06	1.50309	0.722	0.117	0.00223307	7	Ppfia3
1.18588e-06	2.76353	0.778	0.185	0.00237176	7	Kif21a
1.27018e-06	2.80455	0.722	0.121	0.00254036	7	Iqch
1.82651e-06	1.53487	0.833	0.27	0.00365302	7	Il1rapl1
1.92683e-06	1.68106	0.778	0.182	0.00385366	7	Neurl1a
1.93227e-06	0.620736	0.611	0.065	0.00386453	7	Kcnd1
2.02112e-06	2.12845	0.722	0.13	0.00404224	7	Pla1a
2.16177e-06	3.83114	0.667	0.13	0.00432354	7	Phox2b
2.66445e-06	1.82718	0.722	0.114	0.0053289	7	Tuft1
2.9684e-06	1.74528	0.722	0.145	0.00593681	7	2310015A10Rik
3.06847e-06	2.46511	0.667	0.123	0.00613694	7	Apba2
3.22458e-06	2.09741	0.611	0.063	0.00644916	7	Chchd10
3.4447e-06	1.52016	0.889	0.308	0.00688939	7	Ppm1l
3.69935e-06	2.40648	0.889	0.337	0.00739871	7	Pik3r3
3.95034e-06	1.81907	0.611	0.086	0.00790068	7	Hist2h2be
3.99376e-06	2.00807	0.667	0.138	0.00798752	7	Cd80
4.17194e-06	2.54009	0.667	0.061	0.00834388	7	Rab32
4.36947e-06	1.40935	0.667	0.125	0.00873893	7	Dusp28
4.93704e-06	1.38019	0.667	0.134	0.00987408	7	Adcyap1r1
4.96383e-06	2.50552	0.667	0.151	0.00992767	7	Cdh10
4.99076e-06	2.48102	0.833	0.237	0.00998153	7	Itga6
5.01779e-06	1.27089	0.722	0.135	0.0100356	7	Zfp959
5.14133e-06	2.44737	0.722	0.158	0.0102827	7	Itpr3
5.15531e-06	2.48877	0.667	0.128	0.0103106	7	Lgals3bp
5.41191e-06	1.6588	0.667	0.127	0.0108238	7	Gabrb3
5.52978e-06	1.32249	0.611	0.096	0.0110596	7	Gldc
5.66543e-06	2.0234	0.611	0.128	0.0113309	7	Slc35g2
5.68054e-06	1.50276	0.667	0.166	0.0113611	7	2810410L24Rik
6.05903e-06	1.20801	0.889	0.4	0.0121181	7	Plekhg1
6.19042e-06	1.62411	0.778	0.306	0.0123808	7	Fabp5
7.86929e-06	1.07803	0.667	0.117	0.0157386	7	Rassf7
8.1668e-06	0.70013	0.722	0.166	0.0163336	7	Col23a1
8.34158e-06	2.16586	0.889	0.39	0.0166832	7	Id2
8.88761e-06	0.940125	0.833	0.246	0.0177752	7	Prex2
8.93462e-06	1.45844	0.611	0.135	0.0178692	7	Add2
9.22173e-06	2.05781	0.833	0.224	0.0184435	7	Bace2
1.02706e-05	1.87943	0.556	0.089	0.0205412	7	Cnr1
1.11967e-05	2.44998	0.667	0.124	0.0223935	7	Prkcq
1.1433e-05	1.61158	0.722	0.175	0.0228659	7	Trim63
1.25559e-05	2.25097	0.722	0.138	0.0251119	7	Zfp791
1.30883e-05	2.23007	0.667	0.087	0.0261766	7	1700066M21Rik
1.42919e-05	1.1014	0.889	0.508	0.0285838	7	Bub1
1.459e-05	1.7191	0.611	0.123	0.02918	7	Proser2
1.48941e-05	3.52607	0.667	0.145	0.0297881	7	Kcna2
1.53615e-05	2.27946	0.778	0.125	0.030723	7	Hs3st1
1.60066e-05	1.52908	0.778	0.165	0.0320131	7	Ahr
1.62547e-05	1.80679	0.722	0.141	0.0325095	7	Fpgt
1.65921e-05	1.26841	0.611	0.099	0.0331842	7	Elavl3
1.67631e-05	1.42278	0.889	0.275	0.0335262	7	Etl4
1.71098e-05	1.3483	0.667	0.124	0.0342197	7	Ydjc
1.78249e-05	0.378569	0.611	0.156	0.0356499	7	Prune2
1.95386e-05	2.70383	0.722	0.168	0.0390772	7	Csmd1
2.14085e-05	1.565	0.833	0.249	0.042817	7	Sgip1
2.21803e-05	1.0754	0.611	0.113	0.0443606	7	Map3k6
2.45358e-05	1.60919	0.667	0.269	0.0490716	7	Itga4
3.05816e-05	2.64276	0.667	0.148	0.0611631	7	Scn7a
3.32768e-05	2.53269	0.611	0.11	0.0665536	7	Cntn6
3.63755e-05	0.963362	0.611	0.108	0.0727511	7	Rgs11
3.80248e-05	1.62947	0.667	0.123	0.0760495	7	Zfp273
3.84026e-05	2.36617	0.722	0.292	0.0768051	7	Fign
4.13396e-05	2.62456	0.667	0.183	0.0826791	7	Slc35f1
4.21581e-05	1.24105	0.722	0.225	0.0843161	7	Lingo2
4.23651e-05	1.25023	0.667	0.107	0.0847301	7	1700120C14Rik
4.53664e-05	2.7582	0.778	0.276	0.0907327	7	Sntb1
4.83329e-05	1.56268	0.833	0.365	0.0966659	7	Sorbs1
4.88053e-05	1.22579	0.722	0.186	0.0976107	7	Ganc
5.14826e-05	1.97991	0.333	0.103	0.102965	7	1700019D03Rik
5.33872e-05	1.29066	0.611	0.169	0.106774	7	Dlx5
6.09584e-05	1.9462	0.611	0.189	0.121917	7	Spire2
6.45713e-05	1.42747	0.667	0.172	0.129143	7	Arhgap20
7.02035e-05	0.957914	0.611	0.083	0.140407	7	Fam161a
7.73958e-05	1.86754	0.611	0.204	0.154792	7	Gla
7.77638e-05	1.56326	0.667	0.176	0.155528	7	Sh2d4a
8.07679e-05	1.25241	0.611	0.104	0.161536	7	Sbspon
8.23108e-05	1.79622	0.722	0.132	0.164622	7	Rab27a
8.30924e-05	2.60441	0.667	0.207	0.166185	7	Ppp1r26
8.34862e-05	1.44146	0.833	0.317	0.166972	7	Col14a1
8.38815e-05	0.71685	0.833	0.366	0.167763	7	Nid1
8.46768e-05	1.16674	0.667	0.204	0.169354	7	Zfp429
8.50781e-05	2.08416	0.722	0.294	0.170156	7	Nr2f2
8.58848e-05	2.28848	0.667	0.127	0.17177	7	Ezr
8.66984e-05	1.31535	0.611	0.124	0.173397	7	Fsbp
8.83483e-05	1.68788	0.5	0.149	0.176697	7	Pemt
9.08785e-05	0.795476	0.778	0.355	0.181757	7	Serpine2
0.000108563	1.36264	0.611	0.159	0.217126	7	Ptprt
0.00011373	0.962765	0.778	0.218	0.22746	7	Zbtb2
0.00011667	1.0177	0.611	0.132	0.233339	7	Map4k1
0.00011803	0.780059	0.889	0.363	0.23606	7	Cenpe
0.000119404	1.2119	0.667	0.124	0.238808	7	Pfkfb1
0.000137438	1.09178	0.611	0.113	0.274876	7	Adora2a
0.000149597	1.55545	0.5	0.124	0.299195	7	Cdk18
0.000178222	1.18904	0.611	0.165	0.356443	7	9330159F19Rik
0.000184781	1.22944	0.611	0.144	0.369562	7	Arl4d
0.000188147	0.843175	0.833	0.342	0.376294	7	Ccnd1
0.000195929	1.52525	0.611	0.114	0.391857	7	4933431E20Rik
0.000196813	3.39555	0.556	0.089	0.393626	7	Apold1
0.000222122	0.85913	0.5	0.155	0.444243	7	Trim67
0.000223115	2.39238	0.667	0.203	0.446231	7	Dtna
0.000223115	1.21511	0.611	0.189	0.446231	7	Emb
0.000232244	1.87628	0.667	0.165	0.464489	7	Thnsl1
0.000236418	0.605833	0.5	0.115	0.472836	7	Elavl2
0.000243884	0.392688	0.611	0.186	0.487769	7	Zfp963
0.000256069	1.784	0.778	0.259	0.512138	7	Slc44a5
0.000259489	2.03421	0.611	0.193	0.518979	7	Nell2
0.00027001	1.10028	0.667	0.156	0.540019	7	Fignl2
0.000272401	0.699029	0.611	0.123	0.544802	7	Rep15
0.000277244	0.926406	0.667	0.211	0.554487	7	Epha6
0.000293545	1.06633	0.611	0.103	0.587089	7	Fbxl8
0.000297433	2.71362	0.722	0.301	0.594866	7	Nkain2
0.000298739	1.98508	0.667	0.235	0.597479	7	Abcb10
0.0003121	1.21144	0.5	0.089	0.6242	7	Spag4
0.000312102	0.968475	0.5	0.113	0.624204	7	Pnpo
0.000343497	0.63067	0.778	0.221	0.686995	7	Kazn
0.000352559	2.63001	0.611	0.118	0.705117	7	Slitrk6
0.0003595	1.06805	0.667	0.197	0.718999	7	Pcdhga9
0.000369754	0.348705	0.667	0.232	0.739507	7	Dclre1c
0.000369755	1.01847	0.667	0.201	0.739509	7	Mill2
0.0003762	1.04056	0.556	0.156	0.752399	7	Rab6b
0.000386062	1.55645	0.611	0.155	0.772124	7	Tspyl3
0.000386064	1.03049	0.778	0.345	0.772129	7	Lama2
0.000392774	1.30354	0.667	0.18	0.785549	7	Ggact
0.000403045	1.16993	0.667	0.192	0.80609	7	Prtg
0.000417129	0.842739	0.889	0.43	0.834258	7	Sox5
0.000452441	1.91142	0.722	0.248	0.904883	7	Opcml
0.000467125	0.864591	0.611	0.207	0.934251	7	Zfp811
0.000469122	1.10654	0.611	0.155	0.938243	7	Prox2
0.00048227	1.61538	0.722	0.262	0.964539	7	Npr3
0.000503163	1.00009	0.611	0.245	1	7	Gm20754
0.000554464	1.70371	0.722	0.303	1	7	Immp2l
0.000571018	0.741048	0.722	0.241	1	7	S100a6
0.000573421	2.58065	0.667	0.227	1	7	Dab1
0.00058802	1.41542	0.556	0.106	1	7	Mars2
0.000588033	0.859896	0.611	0.173	1	7	Mlip
0.000600473	2.16306	0.611	0.165	1	7	Fgd5
0.000613159	2.14441	0.667	0.259	1	7	Col25a1
0.000631338	0.648478	0.556	0.134	1	7	Bche
0.00070334	1.18987	0.722	0.314	1	7	Fam78b
0.000765413	1.01529	0.611	0.104	1	7	Car11
0.000918051	0.273544	0.611	0.211	1	7	Gm15663
0.000965749	1.49231	0.444	0.132	1	7	Hvcn1
0.000999485	0.25549	0.833	0.311	1	7	Fmnl2
0.00102808	1.40614	0.722	0.332	1	7	Thsd7a
0.00105319	0.897937	0.611	0.172	1	7	Ptpru
0.00105743	2.33289	0.611	0.239	1	7	Mdga2
0.00107024	0.645861	0.556	0.142	1	7	Tmc4
0.00115942	0.312237	0.111	0.254	1	7	Klhl11
0.00117337	1.16236	0.722	0.296	1	7	Dlgap1
0.00120414	1.67123	0.556	0.123	1	7	Tnfrsf22
0.00121134	1.58039	0.556	0.127	1	7	Car13
0.00125044	0.960691	0.667	0.225	1	7	Jakmip2
0.00133217	2.1932	0.667	0.258	1	7	Adgrg6
0.00134007	1.14323	0.611	0.179	1	7	Erap1
0.00136945	1.32523	0.667	0.189	1	7	Abca3
0.00138028	0.37429	0.778	0.296	1	7	Ebpl
0.00142438	1.3242	0.444	0.163	1	7	Mettl22
0.00144974	0.894296	0.611	0.13	1	7	Doc2g
0.00156155	1.82731	0.444	0.144	1	7	Edaradd
0.00157684	0.683465	0.611	0.17	1	7	Nim1k
0.00158917	1.66409	0.722	0.272	1	7	Tgfbr3
0.00158917	1.03936	0.5	0.144	1	7	Vmn2r29
0.00169104	0.827036	0.444	0.234	1	7	Tcp11l2
0.00175095	1.52165	0.667	0.196	1	7	Abca8b
0.00178508	1.20031	0.889	0.351	1	7	Sema5a
0.00190571	0.891281	0.667	0.299	1	7	Tex14
0.00194259	1.02845	0.611	0.194	1	7	Zfp14
0.00204936	0.88785	0.611	0.182	1	7	Pdzk1
0.00205719	1.62036	0.556	0.132	1	7	Tlcd2
0.00216973	0.841889	0.667	0.268	1	7	Sorbs2os
0.00216973	0.812256	0.556	0.141	1	7	Aldoc
0.00218626	0.536421	0.667	0.289	1	7	Cdyl2
0.00223654	1.45275	0.722	0.375	1	7	Fyn
0.00227924	1.31523	0.722	0.256	1	7	Hist1h1c
0.00230523	1.89958	0.667	0.27	1	7	Neat1
0.00233148	1.99432	0.611	0.27	1	7	Ndst3
0.00254203	0.701715	0.778	0.383	1	7	Adcy2
0.0026986	0.45872	0.833	0.394	1	7	2610035D17Rik
0.00270868	0.98542	0.722	0.334	1	7	Nav2
0.00281131	0.723116	0.611	0.427	1	7	H2afz
0.00284278	0.725872	0.667	0.266	1	7	Tenm2
0.00293371	2.63765	0.556	0.148	1	7	Plekhb1
0.00297192	1.02846	0.5	0.166	1	7	Mlycd
0.00303288	1.76286	0.667	0.199	1	7	Mvp
0.00309499	1.55061	0.5	0.159	1	7	Ildr2
0.00315244	0.528349	0.722	0.404	1	7	Stmn1
0.00321087	0.506797	0.667	0.376	1	7	Smc2
0.0033307	0.461378	0.611	0.189	1	7	Edn1
0.00350529	1.14502	0.5	0.194	1	7	Anks6
0.00381031	2.43283	0.444	0.158	1	7	Aldh1a7
0.00383794	0.288953	0.556	0.169	1	7	Acad12
0.00385183	1.74864	0.5	0.215	1	7	Arrb1
0.00405104	1.80293	0.722	0.332	1	7	Dclk2
0.00436744	1.82049	0.667	0.258	1	7	Matn2
0.00444598	2.11924	0.444	0.158	1	7	Celsr2
[truncated: 27 more rows]

## Sheet: intC_pseudotime
	pseudotime
C101	7.82685
C103	6.12505
C108	8.68367
C110	Inf
C112	6.47757
C116	Inf
C118	8.83888
C119	8.68373
C120	6.47763
C121	6.47769
C122	8.68378
C124	6.49654
C125	5.67732
C126	6.79769
C128	6.1899
C129	6.38864
C130	8.75797
C131	6.80136
C132	6.87185
C133	7.01747
C134	6.71086
C135	6.86407
C136	8.68384
C139	8.6839
C141	8.43254
C142	6.92399
C143	6.53655
C144	5.67668
C146	8.0095
C147	8.01249
C148	6.61836
C150	7.82691
C154	8.68396
C155	7.83172
C156	6.47774
C157	8.68401
C158	7.82697
C161	6.4778
C163	6.47786
C164	6.47792
C165	6.60489
C166	6.23523
C167	6.61791
C168	7.84494
C170	8.68407
C172	8.68413
C174	7.82703
C177	8.84075
C184	6.71389
C185	5.66186
C186	7.8783
C187	8.42875
C189	8.52992
C190	Inf
C193	6.47797
C194	6.61078
C195	6.92151
C196	6.60786
C201	7.61303
C204	6.26269
C205	6.6386
C206	Inf
C208	7.64831
C210	5.36891
C211	6.84064
C212	7.83572
C213	8.83945
C215	Inf
C217	7.19603
C218	Inf
C220	6.56353
C221	6.62363
C224	7.64204
C225	Inf
C226	6.20019
C227	7.61309
C231	7.82708
C232	4.75966
C233	6.68014
C234	Inf
C236	6.47803
C237	8.68419
C238	5.4097
C239	8.96181
C240	8.54778
C241	6.47809
C243	8.77211
C244	8.75803
C245	8.75809
C249	7.8072
C250	6.70311
C251	6.80246
C252	9.0739
C253	8.94456
C254	Inf
C255	7.35942
C256	5.17793
C260	5.41016
C262	7.86526
C265	6.47815
C270	5.71937
C271	Inf
C276	6.47821
C278	8.96552
C281	8.84047
C293	6.47826
C305	5.7886
C309	3.89457
C310	4.17382
C311	6.6793
C316	3.26964
C317	5.20173
C321	1.09617
C326	4.47058
C327	5.58899
C333	4.46616
C335	3.82426
C339	4.93224
C344	3.89463
C346	3.12711
C350	4.16484
C351	2.89422
C353	5.3454
C354	1.91404
C355	2.95571
C356	4.46418
C358	4.05135
C360	5.36462
C361	4.75971
C364	6.55234
C365	4.4704
C366	2.99556
C368	2.92476
C369	6.83404
C370	6.55642
C371	4.47063
C372	3.97827
C374	5.64415
C375	3.45519
C376	5.2261
C377	2.95577
C380	6.15794
C382	4.75977
C386	4.17388
C403	0.59828
C405	4.24313
C406	6.53661
C407	2.73002
C409	5.03677
C416	1.39781
C417	2.74653
C419	5.26501
C420	2.68786
C424	5.10158
C431	0.397967
C436	2.67331
C437	3.4572
C440	3.97279
C441	3.8065
C442	2.33172
C444	1.10958
C446	3.66731
C447	4.0505
C451	3.98597
C453	2.61998
C454	3.77975
C455	5.65398
C456	4.22803
C457	5.50462
C458	2.44855
C459	3.47742
C461	4.36025
C464	5.10495
C465	5.16766
C466	4.17393
C468	3.54107
C477	5.13097
C485	4.9478
C486	0.0382175
C489	1.65484
C492	5.47551
C496	1.38029
C503	3.89468
C507	1.07582
C510	3.66625
C511	0.230883
C512	1.4745
C513	0.390077
C515	2.88427
C516	4.34375
C519	1.36602
C524	0
C525	1.69501
C527	5.37047
C531	1.60882
C534	0.158317
C540	0.872057
C546	0.558999
C551	4.20406
C552	1.71641
C555	2.90924
C556	1.39107
C557	1.6549
C558	0.0104633
C560	2.98914
C562	5.06229
C564	1.65496
C567	0.598338
C568	3.89474
C569	0.323763
C573	3.40306
C574	1.75705
C575	0.0666116
C577	1.65501
C580	0.0381599
C590	4.11293
C601	2.44665
C602	2.39993
C603	0.0381023
C605	0.056288
C611	3.03528
C617	2.72367
C618	2.99714
C619	0.0380446
C622	1.85576
C625	2.05418
C626	2.226
C627	0.037987
C630	0.0179889
C633	3.57474
C635	3.94282
C636	2.90499
C643	5.41015
C647	1.89698
C650	2.64598
C654	2.3956
C655	3.8948
C658	2.4509
C659	2.50928
C660	2.61748
C661	4.25179
C662	4.46512
C664	4.04076
C666	4.75983
C667	3.53356
C668	2.66607
C670	3.16663
C672	3.56784
C673	0.0923625
C674	4.0984
C701	4.17399
C708	2.71965
C709	0.0379294
C710	3.84532
C711	4.52897
C712	2.90581
C713	4.06923
C715	3.02111
C716	2.77472
C721	2.78607
C722	6.56174
C723	3.02789
C724	3.34032
C725	4.17405
C726	2.66612
C727	4.13953
C728	1.76893
C729	2.99422
C731	2.48851
C736	4.00859
C737	1.95912
C739	5.61539
C740	3.02292
C743	2.91186
C744	4.94785
C752	3.12403
C753	4.04082
C755	2.99562
C757	0.110869
C762	2.52379
C763	3.99965
C766	4.46622
C769	3.01832
C770	3.38597
C772	0.0378717
C773	4.19651
C775	6.14454
C780	5.56466
C781	4.23496
C784	0.0446189
C788	3.63204
C790	2.82801
C792	4.0106
C794	1.65507
E17.5_EYFP_AAACCAACACAATTAC-1	5.26803
E17.5_EYFP_AAAGCCGCAAAGCGCA-1	6.47832
E17.5_EYFP_AAAGCTTGTAGGTTAT-1	4.48563
E17.5_EYFP_AAAGGACGTAACGGGA-1	6.47838
E17.5_EYFP_AAAGGACGTACAAAGA-1	3.95019
E17.5_EYFP_AAAGGTTAGTGCTGTG-1	6.47844
E17.5_EYFP_AACCTTAAGTAACCAC-1	8.68424
E17.5_EYFP_AACTCACAGAAAGCAT-1	5.36896
E17.5_EYFP_AACTCACAGAAGGTGC-1	4.46424
E17.5_EYFP_AACTCACAGGCTACAT-1	6.47849
E17.5_EYFP_AAGAATCAGTCAGGCC-1	4.75989
E17.5_EYFP_AAGGTATAGGCTGTCA-1	7.88658
E17.5_EYFP_AAGTGCAAGGCCATCA-1	Inf
E17.5_EYFP_AAGTTACGTCCAAATG-1	3.96613
E17.5_EYFP_AATCATGTCCCGTTGT-1	6.53667
E17.5_EYFP_AATCCGTAGAGAAGGG-1	2.99568
E17.5_EYFP_AATTACCCAACTAGCC-1	3.97017
E17.5_EYFP_AATTAGGCAGTAGGTG-1	8.6843
E17.5_EYFP_AATTGTGTCGAGGTGG-1	8.82736
E17.5_EYFP_ACAGGTAAGTCACTCC-1	4.46447
E17.5_EYFP_ACCCGTAAGTGAGCGG-1	6.53672
E17.5_EYFP_ACCTCACTCAGTGAAG-1	4.79837
E17.5_EYFP_ACCTGGATCTGCAACG-1	6.49916
E17.5_EYFP_ACCTGGTCACGGTTTA-1	7.82714
E17.5_EYFP_ACGTCCAAGACTTACA-1	Inf
E17.5_EYFP_ACTCGCTTCCAAACAC-1	6.53297
E17.5_EYFP_ACTCGCTTCCTTGAGG-1	5.36902
E17.5_EYFP_ACTGAAACAGCAAGAT-1	4.82187
E17.5_EYFP_AGAACAAGTTTGGCGG-1	6.68577
E17.5_EYFP_AGAATCGAGCCATCAG-1	3.11914
E17.5_EYFP_AGATGCTTCAAACTCA-1	5.37572
E17.5_EYFP_AGATGCTTCCAACTGG-1	6.53678
E17.5_EYFP_AGCAATACACAAAGAC-1	6.59767
E17.5_EYFP_AGGAACGGTTGCGGAT-1	Inf
E17.5_EYFP_AGGTTAGAGGCGCTAC-1	5.41654
E17.5_EYFP_AGGTTAGAGTAACCAC-1	5.20315
E17.5_EYFP_AGTAACGAGATAAAGC-1	8.75814
E17.5_EYFP_ATAAGCCTCCTTAAGA-1	6.47855
E17.5_EYFP_ATAGCATGTTAGAGGG-1	5.25263
E17.5_EYFP_ATATGCTCAAACAACA-1	6.47861
E17.5_EYFP_ATATGGTGTTAAGTGT-1	6.56289
E17.5_EYFP_ATCACACAGGGTGAGT-1	4.47069
E17.5_EYFP_ATCACACAGTAACGGA-1	8.92995
E17.5_EYFP_ATGACTCAGACACTTA-1	8.68436
E17.5_EYFP_ATGGTCTAGGATGATG-1	2.99573
E17.5_EYFP_ATGTCAATCGTGCTTC-1	7.30057
E17.5_EYFP_CAAAGTGAGGTGAAAT-1	8.68442
E17.5_EYFP_CAACAGGCAATCCCTT-1	5.26506
E17.5_EYFP_CAACAGGCAGGCTTCG-1	6.61561
E17.5_EYFP_CAACCCGCACAGCCTG-1	5.31572
E17.5_EYFP_CAAGGGAGTGATTACG-1	6.47867
E17.5_EYFP_CACCTCAGTTACATCC-1	6.80536
E17.5_EYFP_CACTTTGTCATCCTGC-1	4.07847
E17.5_EYFP_CAGGGCTTCTAAGTGC-1	8.3853
E17.5_EYFP_CAGTACCCATAGCGGA-1	4.75995
E17.5_EYFP_CATTCCTCAAGATTCT-1	6.47872
E17.5_EYFP_CATTGTGCAAGGTGGC-1	3.53524
E17.5_EYFP_CCATATTTCATTGTTC-1	3.89286
E17.5_EYFP_CCATCATGTTTGCGCC-1	6.67121
E17.5_EYFP_CCCTCACCAAACGGGC-1	7.8272
E17.5_EYFP_CCCTCATAGTGAGCAA-1	6.53684
E17.5_EYFP_CCTGGTAAGTTCCTGC-1	8.68448
E17.5_EYFP_CCTGTAACATCACTTC-1	4.46585
E17.5_EYFP_CCTTAGTGTGGACATC-1	8.88541
E17.5_EYFP_CCTTATGTCCTTCTAG-1	4.47075
E17.5_EYFP_CCTTCAATCGGGCCAT-1	6.5369
E17.5_EYFP_CCTTCGTAGTCACTCC-1	5.26512
E17.5_EYFP_CGAACCGGTTTGACCT-1	7.82726
E17.5_EYFP_CGACTAAGTAACCACA-1	4.09263
E17.5_EYFP_CGCACACAGTGACCTG-1	6.60007
E17.5_EYFP_CGCACCACATCGCTTT-1	8.68453
E17.5_EYFP_CGGACAACACTTACAG-1	7.73624
E17.5_EYFP_CTAACCCTCCTAAGTA-1	4.76
E17.5_EYFP_CTAATCCGTTCACCCA-1	6.47878
E17.5_EYFP_CTACGAAGTTGGATCA-1	6.47884
E17.5_EYFP_CTACTTAGTAGCCATA-1	8.00539
E17.5_EYFP_CTCCTCACATAATCAC-1	2.46039
E17.5_EYFP_CTGGTCAAGGATCACT-1	8.68459
E17.5_EYFP_CTGTTAAAGCTGAGGG-1	4.76006
E17.5_EYFP_CTGTTCATCAAAGGCA-1	6.55647
E17.5_EYFP_CTTCAATTCTCGACCT-1	5.45933
E17.5_EYFP_CTTCATCCAACACCTA-1	4.46464
E17.5_EYFP_CTTGCAACACAAGCCT-1	6.4789
E17.5_EYFP_CTTTAGTTCCCATAAA-1	5.1639
E17.5_EYFP_GAACCAAAGCATTTCT-1	4.46516
E17.5_EYFP_GAACCTTAGAGCAAGC-1	6.70778
E17.5_EYFP_GAACCTTAGGACCTCA-1	5.83278
E17.5_EYFP_GAAGCTAAGAGGAGGA-1	8.68465
E17.5_EYFP_GACAATACAGGCGAGT-1	6.47895
E17.5_EYFP_GAGAACCAGTACTGGT-1	5.42564
E17.5_EYFP_GAGCAAGGTACGGTAC-1	6.53695
E17.5_EYFP_GAGGCCTTCGTTACTT-1	4.73917
E17.5_EYFP_GAGTAATAGTACCGCA-1	6.47901
E17.5_EYFP_GATGAGGGTTTCCTCC-1	4.11299
E17.5_EYFP_GATGCATTCCGTAAAC-1	5.08837
E17.5_EYFP_GATTACGGTTAGTTGG-1	6.60975
E17.5_EYFP_GATTACTCAGGTTACC-1	7.61315
E17.5_EYFP_GCAAACAAGTAACCAC-1	4.76012
E17.5_EYFP_GCACATTAGCACAGAA-1	5.93773
E17.5_EYFP_GCAGCCAGTAGTTAAC-1	6.47907
E17.5_EYFP_GCAGCTATCACCGGTA-1	5.44145
E17.5_EYFP_GCCACAATCAATCATG-1	9.02668
E17.5_EYFP_GCCGTGAGTAACTACG-1	Inf
E17.5_EYFP_GCCTCAAAGTTTGTCT-1	4.4681
E17.5_EYFP_GCCTTGCGTCCACAAA-1	5.57219
E17.5_EYFP_GCGAGTGAGCTCCTTA-1	8.68471
E17.5_EYFP_GCGATATTCCACCTGT-1	6.47913
E17.5_EYFP_GCGCCTTGTTCAAGCA-1	Inf
E17.5_EYFP_GCGCTTAAGGAAGCTA-1	8.44909
E17.5_EYFP_GCGTTTCTCAGCACCA-1	8.68476
E17.5_EYFP_GCTAAGCGTTAACGAT-1	6.53701
E17.5_EYFP_GCTATTGCATATAACC-1	2.52384
E17.5_EYFP_GCTGACCAGCTGCACA-1	8.68482
E17.5_EYFP_GGAACCTGTTTGAGCA-1	5.36908
E17.5_EYFP_GGAAGTATCTATTGTC-1	4.47081
E17.5_EYFP_GGACAGCCATCTAGCA-1	4.72811
E17.5_EYFP_GGAGGTTAGGATTTGC-1	4.46479
E17.5_EYFP_GGATGAATCTGGCATG-1	8.68488
E17.5_EYFP_GGATTCAGTTGTAAAC-1	4.46716
E17.5_EYFP_GGCAAGCCAATATAGG-1	3.05474
E17.5_EYFP_GGCTATGTCTCACTAT-1	4.17411
E17.5_EYFP_GGCTCAATCATTTGCT-1	7.19609
E17.5_EYFP_GGGCATGAGTCATGCG-1	4.47086
E17.5_EYFP_GGGCGAATCGCGACAC-1	8.68494
E17.5_EYFP_GGGTTACGTCATAGAT-1	4.83993
E17.5_EYFP_GGTCAAGCATTTGCTC-1	5.67159
E17.5_EYFP_GGTCCATCACTAAGTT-1	7.82732
E17.5_EYFP_GGTCGGTTCGGGACCT-1	6.18502
E17.5_EYFP_GGTGCTTCACTAAGAA-1	4.57279
E17.5_EYFP_GGTGTCCAGCAAGGTA-1	8.81464
E17.5_EYFP_GGTTAATGTTATCGAG-1	6.47919
E17.5_EYFP_GGTTTAATCGTTCACC-1	7.64231
E17.5_EYFP_GTAAGCAAGCCAAATC-1	7.19615
E17.5_EYFP_GTACACCCACAGAACG-1	6.61217
E17.5_EYFP_GTAGCCATCCAGGTTG-1	5.80625
E17.5_EYFP_GTATTGCAGTCCTTCA-1	4.76878
E17.5_EYFP_GTATTGCAGTGAACAG-1	6.9052
E17.5_EYFP_GTCGAAGCATAGACCC-1	6.53707
E17.5_EYFP_GTCGAGGAGTGAGCGG-1	5.40279
E17.5_EYFP_GTCGCAATCCCGTTAC-1	8.68499
E17.5_EYFP_GTGAATCTCGTGCTAG-1	4.46605
E17.5_EYFP_GTGATCAGTGTAACCA-1	7.19621
E17.5_EYFP_GTGGACACAGCATGTC-1	8.68505
E17.5_EYFP_GTGGCTTCACATTGCA-1	6.59742
E17.5_EYFP_GTGTAACTCAGGATGA-1	6.47924
E17.5_EYFP_GTTGGAGCAGGCTGTT-1	8.68511
E17.5_EYFP_TAAAGCCTCCAGGGAG-1	8.7582
E17.5_EYFP_TAAGGCTTCGCTTGCT-1	Inf
E17.5_EYFP_TACCGCAAGCTGTCAG-1	6.4793
E17.5_EYFP_TACGGATTCACAGACT-1	4.0308
E17.5_EYFP_TACGTAATCATGGCCA-1	6.92405
E17.5_EYFP_TACTTCGTCACAGGAA-1	6.8468
E17.5_EYFP_TAGCCTCTCCTTCGTA-1	5.10759
E17.5_EYFP_TAGCCTCTCGGTTTCC-1	8.68517
E17.5_EYFP_TAGGTGCGTCGTTACT-1	6.49748
E17.5_EYFP_TATGCATCATTGTCCT-1	8.68522
E17.5_EYFP_TATGGGCGTGCTGTAA-1	Inf
E17.5_EYFP_TCACATAAGACAAAGT-1	4.64175
E17.5_EYFP_TCACCTGGTTGCACAA-1	8.96558
E17.5_EYFP_TCAGGTTAGGGCTTAT-1	6.47936
E17.5_EYFP_TCAGTGAGTCCCGAAG-1	2.82428
E17.5_EYFP_TCCATATTCCGGTTGA-1	3.35648
E17.5_EYFP_TCCTCACAGGAGCATA-1	7.02872
E17.5_EYFP_TCCTGTTCACTGGCCA-1	4.11304
E17.5_EYFP_TCCTTGCAGCGGTTAT-1	8.96563
E17.5_EYFP_TCGGTTACACGAATCC-1	8.46491
E17.5_EYFP_TCGGTTCTCCCGTTGT-1	4.9784
E17.5_EYFP_TCGTTACGTAAAGCAA-1	6.61876
E17.5_EYFP_TCTGGCTTCCGGCTAA-1	7.93071
E17.5_EYFP_TCTGGCTTCTAGCTAA-1	6.53713
E17.5_EYFP_TGAAGCAAGCGAAGTA-1	6.47942
E17.5_EYFP_TGAGCAAAGGGCCACT-1	7.97241
E17.5_EYFP_TGAGGGAGTCGAAGTC-1	6.94046
E17.5_EYFP_TGATGATGTTACAAAC-1	8.96569
E17.5_EYFP_TGCCTGTTCCTGGTGA-1	6.53718
E17.5_EYFP_TGCCTGTTCGCAACAT-1	7.71365
E17.5_EYFP_TGCGCAGGTTTAACCC-1	4.76018
E17.5_EYFP_TGCTCACTCTCACATT-1	7.19627
E17.5_EYFP_TGGACTAGTGCCGCAA-1	8.93427
E17.5_EYFP_TGGATTGGTTAACGAT-1	8.68528
E17.5_EYFP_TGGCTATAGCCGCAAC-1	Inf
E17.5_EYFP_TGGCTTTGTCCTAATC-1	8.83517
E17.5_EYFP_TGTCATAAGAATCGCT-1	6.47947
E17.5_EYFP_TGTCATAAGCCACATG-1	6.523
E17.5_EYFP_TGTTCCTCAAGCCAGA-1	4.1131
E17.5_EYFP_TGTTGTGCATAGCAGG-1	6.53724
E17.5_EYFP_TTAATCGAGCTCCTTA-1	6.5373
E17.5_EYFP_TTAGTCAAGGACGTAA-1	3.82867
E17.5_EYFP_TTCAGGTAGATTCCTT-1	6.65569
E17.5_EYFP_TTCATCCCAGGACCTT-1	3.89486
E17.5_EYFP_TTCCTTGAGGTCATTA-1	3.97727
E17.5_EYFP_TTCGCAACAATAGTCT-1	5.70796
E17.5_EYFP_TTGAGGCGTTTGCGCC-1	4.46674
E17.5_EYFP_TTGCAACAGTAACCCG-1	6.87646
E17.5_EYFP_TTGCTTTAGAGGAGGA-1	5.93701
E17.5_EYFP_TTTAAGCCACTAAGCC-1	6.47953
E17.5_EYFP_TTTGCGGAGAAACTGG-1	6.53736
E17.5_EYFP_TTTGTTGGTTGTTGTC-1	6.92411
E14.5_EYFP_AAACCGAAGTAAAGGT-1	5.74225
E14.5_EYFP_AAACGCGCAACCTAAT-1	2.43712
E14.5_EYFP_AAAGCCGCAATTTGGT-1	4.11316
E14.5_EYFP_AAAGCGGGTCTTGCAT-1	6.53741
E14.5_EYFP_AACTAGTGTGGGTACT-1	6.63868
E14.5_EYFP_AAGCCTCCAGCTAATT-1	7.15339
E14.5_EYFP_AAGCGAATCGTAACGT-1	2.87672
E14.5_EYFP_AAGCGTTTCCCTCGCA-1	6.53747
E14.5_EYFP_AAGGATTAGGACCAGG-1	6.53753
E14.5_EYFP_AAGGTCAAGCGGATAA-1	5.50376
E14.5_EYFP_AAGTGCAAGCAAGGTA-1	2.79007
E14.5_EYFP_AAGTTTGTCGTTCACC-1	6.561
E14.5_EYFP_AATAACCGTGAGACTC-1	6.53759
E14.5_EYFP_AATCAGGAGGTGCGGA-1	6.68904
E14.5_EYFP_AATTAGGCAAGACTCC-1	0.0754341
E14.5_EYFP_AATTGTGTCCGTTAAA-1	6.47959
E14.5_EYFP_ACAAAGGTCGCTCCAT-1	2.66618
E14.5_EYFP_ACAAAGGTCTTAATGG-1	2.64465
E14.5_EYFP_ACAGCCGGTAGTTGGC-1	8.66482
E14.5_EYFP_ACAGCCGGTGATCAGC-1	4.17416
E14.5_EYFP_ACCAGGACAAGTAAGC-1	6.53765
E14.5_EYFP_ACCATAATCAAGCTAC-1	6.82385
E14.5_EYFP_ACCATTAAGGTGCTGC-1	6.47965
E14.5_EYFP_ACCTAAGGTTATTGCC-1	1.15819
E14.5_EYFP_ACCTGGATCTTGAGCG-1	3.44138
E14.5_EYFP_ACGAAGTCAAAGCGCA-1	7.22106
E14.5_EYFP_ACGATTCAGCAGGTGG-1	2.99579
E14.5_EYFP_ACTAACCAGTTATCCT-1	3.81622
E14.5_EYFP_ACTAACGGTCCAAGAC-1	7.24365
E14.5_EYFP_ACTAGGCGTCACACCC-1	7.19296
E14.5_EYFP_ACTTAGGGTAGCTAAT-1	3.5807
E14.5_EYFP_ACTTAGTCATTGCGTA-1	6.5377
E14.5_EYFP_AGAACCGCAGCATGTC-1	2.8118
E14.5_EYFP_AGACAATAGTTTGCGG-1	3.75979
E14.5_EYFP_AGAGAGGAGCTTAGCG-1	6.63543
E14.5_EYFP_AGAGGATGTGTGCACG-1	6.54776
E14.5_EYFP_AGCAAATAGCAAACCT-1	4.02322
E14.5_EYFP_AGCCTAGTCCGCCTAT-1	2.636
E14.5_EYFP_AGCTGCTCACGTTACA-1	6.53776
E14.5_EYFP_AGGAAACGTAACGGGA-1	4.88712
E14.5_EYFP_AGGACGTAGTTATGGC-1	7.41038
E14.5_EYFP_AGGAGCTAGTGGCGGA-1	5.26518
E14.5_EYFP_AGGATCCGTAGACAAA-1	6.70591
E14.5_EYFP_AGGTCTTAGTAACGAG-1	3.85293
E14.5_EYFP_AGTAATGCAATTAAGG-1	2.38302
E14.5_EYFP_AGTGCACGTCCGTAGG-1	7.04156
E14.5_EYFP_AGTTTGATCTAGCTTT-1	4.12836
E14.5_EYFP_ATCAGGTTCGTTTCGC-1	0.0401191
E14.5_EYFP_ATCATCAAGAAAGCAT-1	4.05056
E14.5_EYFP_ATCCCGCGTAGACAAA-1	7.48322
E14.5_EYFP_ATCGGCCAGCTTAGCG-1	5.33783
E14.5_EYFP_ATGCAAACAGGTTAAA-1	7.07043
E14.5_EYFP_ATGCCTGAGTCAATCA-1	7.78673
E14.5_EYFP_ATGCTTAAGACTCGCA-1	7.38053
E14.5_EYFP_ATGCTTAAGTGAACCT-1	6.53782
E14.5_EYFP_ATGGCCGGTGAGGTGA-1	4.00506
E14.5_EYFP_ATGGCCGGTTGTAACG-1	5.56009
E14.5_EYFP_ATGTCCACACCAGCAT-1	2.25543
E14.5_EYFP_ATGTCCACACTTAACG-1	6.56457
E14.5_EYFP_ATGTCCACAGGTATTT-1	6.1505
E14.5_EYFP_ATTAGGTGTTGTTGTC-1	5.10674
E14.5_EYFP_ATTCCTCCAAGGTAAC-1	7.15345
E14.5_EYFP_ATTGGCTAGGTCCACA-1	2.66677
E14.5_EYFP_CAAAGTGAGGAGGTTA-1	7.11302
E14.5_EYFP_CAAGGCCTCAAATCGC-1	6.52306
E14.5_EYFP_CAATATGTCCCTGATC-1	7.19302
E14.5_EYFP_CAATGTGGTAATTAGC-1	6.53788
E14.5_EYFP_CACAGGGAGGGATGCG-1	7.39416
E14.5_EYFP_CACTAGCCACGAATTT-1	4.76023
E14.5_EYFP_CACTGACCAAACAACA-1	7.88791
E14.5_EYFP_CACTTTGTCATTGCGG-1	4.18202
E14.5_EYFP_CAGCCTAAGCTCGCTT-1	2.74803
E14.5_EYFP_CAGCTATAGCATTAGC-1	3.8874
E14.5_EYFP_CAGGACCTCATTATGG-1	6.53793
E14.5_EYFP_CAGTACCCAACTAGCC-1	6.53799
E14.5_EYFP_CATAGGTTCAGGTTTA-1	6.36774
E14.5_EYFP_CATGAGGCACTGACTA-1	2.58756
E14.5_EYFP_CATGCAAGTTCGCGCT-1	7.19307
E14.5_EYFP_CATGCGGGTAGCTAAT-1	2.17856
E14.5_EYFP_CATGGATTCCCGCCTA-1	4.76029
E14.5_EYFP_CATGGATTCCTCCATA-1	6.56645
E14.5_EYFP_CATTATGAGAGGGACT-1	4.03873
E14.5_EYFP_CATTGTAAGACAACGA-1	6.688
E14.5_EYFP_CCACATTGTGTTTCAC-1	6.53805
E14.5_EYFP_CCATCATGTCATAACG-1	6.53811
E14.5_EYFP_CCGCTTAGTGTCCAAA-1	6.4797
E14.5_EYFP_CCGGTTAAGTTTGAGC-1	7.1535
E14.5_EYFP_CCTAAGTAGCGCTCAA-1	2.91373
E14.5_EYFP_CCTCCTGAGTCTCACC-1	1.65513
E14.5_EYFP_CCTTTAGTCTTGACCC-1	6.57454
E14.5_EYFP_CGAACAAAGCATGCAT-1	2.99585
E14.5_EYFP_CGAGTCGGTAATGGAA-1	6.66949
E14.5_EYFP_CGCACAATCAAGCTTA-1	6.53816
E14.5_EYFP_CGCATATAGGATGATG-1	3.4319
E14.5_EYFP_CGCCTGTGTTGCTGGG-1	6.52311
E14.5_EYFP_CGCGGATTCGCTAAAC-1	6.17485
E14.5_EYFP_CGCTCCATCAGCATTA-1	6.53822
E14.5_EYFP_CGCTTAACAATCGCAC-1	2.99591
E14.5_EYFP_CGCTTAACACTGACTA-1	6.47976
E14.5_EYFP_CGGATTAGTAACCACA-1	4.43295
E14.5_EYFP_CGGATTAGTATTTGGG-1	7.43705
E14.5_EYFP_CGTAGTTAGAGAGGCT-1	0.230941
E14.5_EYFP_CGTAGTTAGGTCTTGG-1	5.71704
E14.5_EYFP_CGTATTGCAGGTATTT-1	2.5239
E14.5_EYFP_CGTCAATAGTTATCTC-1	5.85638
E14.5_EYFP_CGTTATCGTGATGGCT-1	6.25583
E14.5_EYFP_CTAAAGCTCTTGACCC-1	0.216285
E14.5_EYFP_CTAATCTTCTCAATTC-1	6.76919
E14.5_EYFP_CTACGAAGTGTAATAC-1	3.58549
E14.5_EYFP_CTAGCTGAGTTATGTG-1	6.91189
E14.5_EYFP_CTAGGCGGTTCGGTAA-1	2.60844
E14.5_EYFP_CTAGTAATCCAAGTTA-1	6.54595
E14.5_EYFP_CTAGTGAGTTACAAAC-1	2.66624
E14.5_EYFP_CTCATCATCGTTACTT-1	2.86786
E14.5_EYFP_CTCCATCAGCTGTCAG-1	5.01156
E14.5_EYFP_CTCCCTGAGGATGATG-1	4.76035
E14.5_EYFP_CTCCGGACAGTCTAGC-1	5.94738
E14.5_EYFP_CTCCGTCCACCAGCAT-1	6.36584
E14.5_EYFP_CTCGTTATCCATCAGG-1	4.93126
E14.5_EYFP_CTGGTTTGTAATCCCT-1	3.98109
E14.5_EYFP_CTGTTAAAGCTATATG-1	6.52317
E14.5_EYFP_CTGTTTAGTTGAGCCG-1	7.20759
E14.5_EYFP_CTTCAAGCATCATGTG-1	7.85209
E14.5_EYFP_CTTGCTCAGGACCTTG-1	1.74967
E14.5_EYFP_CTTTGAGCATTGACAT-1	3.89492
E14.5_EYFP_CTTTGTCCAGGCCAAA-1	0.0378141
E14.5_EYFP_GAATTTGTCATGAGCT-1	2.92795
E14.5_EYFP_GACATTATCATTGCGG-1	6.53828
E14.5_EYFP_GACCTAAGTGTGAGGA-1	4.05061
E14.5_EYFP_GACCTTTGTTAAGTGT-1	3.87334
E14.5_EYFP_GACTTACAGCTTCCCG-1	7.53708
E14.5_EYFP_GAGAGGCGTTAGGCGT-1	2.93876
E14.5_EYFP_GAGCAAGGTATTGTGG-1	6.71642
E14.5_EYFP_GAGCGGTCAGAAATGC-1	6.54761
E14.5_EYFP_GAGGACTAGAATCTCA-1	0.0530252
E14.5_EYFP_GAGGCCTTCTAGCGAT-1	5.90914
E14.5_EYFP_GAGGTAGGTTGGTTAG-1	4.05067
E14.5_EYFP_GAGGTTAAGATTGAGG-1	6.79099
E14.5_EYFP_GAGTAACCAAGGTACG-1	6.80714
E14.5_EYFP_GAGTATCTCATTTGTC-1	2.92482
E14.5_EYFP_GATCAGGCAAAGCTAA-1	0.0377565
E14.5_EYFP_GATCAGGCATAGACCC-1	5.73355
E14.5_EYFP_GATGCTTAGTTATGTG-1	4.59923
E14.5_EYFP_GATTGCAGTTGCCTCA-1	2.45371
E14.5_EYFP_GCCAATTAGTAGGCGG-1	6.47982
E14.5_EYFP_GCCAGGAAGCTTGCTC-1	3.72701
E14.5_EYFP_GCCTGAGGTTAGAGGG-1	7.20463
E14.5_EYFP_GCTGTGATCAAGGACA-1	3.42146
E14.5_EYFP_GGAACCACACTGGCTG-1	4.11322
E14.5_EYFP_GGACCTCAGTAGCCAT-1	3.02133
E14.5_EYFP_GGCAATCGTTCCTGTG-1	4.28474
E14.5_EYFP_GGCCATCAGCATGTCG-1	0.230998
E14.5_EYFP_GGGAGTAGTGATGAGG-1	6.53834
E14.5_EYFP_GGGAGTAGTTAACAGT-1	5.97799
E14.5_EYFP_GGGTCACTCATGCATA-1	6.53839
E14.5_EYFP_GGTAACCGTTCCATTA-1	6.6924
E14.5_EYFP_GGTAACTTCGCTAAAC-1	5.26524
E14.5_EYFP_GGTACTAGTAACGAGG-1	6.53845
E14.5_EYFP_GGTCCTGCACAACAGG-1	6.03466
E14.5_EYFP_GGTTACCCAGAAATTG-1	6.03607
E14.5_EYFP_GGTTGACGTACGGGTT-1	7.3159
E14.5_EYFP_GGTTTCCTCAGCACGC-1	6.53851
E14.5_EYFP_GGTTTGTAGGGTCTAT-1	8.83104
E14.5_EYFP_GTAGCGCTCGCTCCAT-1	4.4689
E14.5_EYFP_GTATTCAAGGTCCAAT-1	5.39765
E14.5_EYFP_GTCAAACTCCGGTATG-1	5.64507
E14.5_EYFP_GTCCTCCCATAATGTC-1	6.12128
E14.5_EYFP_GTCGGTTCACTTCATC-1	6.5665
E14.5_EYFP_GTCTAATCAGTCTAGC-1	3.38159
E14.5_EYFP_GTGAACAAGCTTAACA-1	6.23455
E14.5_EYFP_GTGATCAGTGTGCAAC-1	2.72556
E14.5_EYFP_GTGCTGATCTGCAAAC-1	3.41111
E14.5_EYFP_GTGTCCAAGTATTGGC-1	6.67649
E14.5_EYFP_GTTAACGGTTTGCGAA-1	4.76041
E14.5_EYFP_GTTACTAAGGCATTGT-1	2.88776
E14.5_EYFP_GTTAGGCGTTAGCAGC-1	3.38488
E14.5_EYFP_GTTGGCGGTCCTAAGA-1	6.15664
E14.5_EYFP_GTTGGCGGTTTATTCG-1	2.23165
E14.5_EYFP_GTTTCTAGTTAAGTGT-1	0.19716
E14.5_EYFP_GTTTGCTGTCATCAAG-1	4.46429
E14.5_EYFP_GTTTGTAAGAAAGCAT-1	6.5767
E14.5_EYFP_GTTTGTTTCTAGCGAT-1	4.46785
E14.5_EYFP_TAACCTAAGTACCGCA-1	4.04088
E14.5_EYFP_TAAGCTATCTTTGTAC-1	2.52396
E14.5_EYFP_TAAGGCTTCAAACTCA-1	2.89322
E14.5_EYFP_TACAGCTAGCTTACTT-1	4.17422
E14.5_EYFP_TACCAAATCTCAATAG-1	6.47988
E14.5_EYFP_TACCGAAGTCAGGAAG-1	2.47278
E14.5_EYFP_TACCTTTAGACAAACG-1	4.35092
E14.5_EYFP_TACCTTTAGCCTCTCG-1	4.17428
E14.5_EYFP_TAGTTTGAGGTTAGCT-1	4.46435
E14.5_EYFP_TATCCAGCACCTACGG-1	0.0376989
E14.5_EYFP_TATGGTCAGGTTACAC-1	1.85576
E14.5_EYFP_TCAAGACTCAAACTCA-1	6.52323
E14.5_EYFP_TCAGCGATCAAAGGCA-1	1.41559
E14.5_EYFP_TCAGGTTAGTCATTTC-1	6.53857
E14.5_EYFP_TCATTGTTCGTGCTTC-1	5.61699
E14.5_EYFP_TCGACAAGTTTATTCG-1	6.53862
E14.5_EYFP_TCGGTAAGTTGGATCA-1	6.53868
E14.5_EYFP_TCGTAATCATTGACAT-1	2.67367
E14.5_EYFP_TCGTTATTCTGTTCAT-1	7.52815
E14.5_EYFP_TGAGCACGTGGGTGAA-1	2.82577
E14.5_EYFP_TGAGGGAGTGAGCACT-1	6.67236
E14.5_EYFP_TGCATGAGTTGCTTCG-1	2.48819
E14.5_EYFP_TGCCGGTAGCATTATG-1	6.53874
E14.5_EYFP_TGCCTGTTCTTGAGCG-1	6.5388
E14.5_EYFP_TGCTGGATCGGTAACT-1	2.02053
E14.5_EYFP_TGGCTAAGTTAGCCAA-1	6.62741
E14.5_EYFP_TGGGCATGTGATGAAA-1	6.47993
E14.5_EYFP_TGGTCAGTCAGCCAAT-1	3.41585
E14.5_EYFP_TGGTGCATCAATAGCC-1	4.10923
E14.5_EYFP_TGGTGCATCCCGCCTA-1	3.91647
E14.5_EYFP_TGTAAGTGTGATGAAA-1	4.05073
E14.5_EYFP_TGTAATGTCTATCGCC-1	3.89497
E14.5_EYFP_TGTATCCGTAGCAGCT-1	6.52329
E14.5_EYFP_TGTCAGTAGCGGGCAA-1	2.83777
E14.5_EYFP_TGTGATCAGATAGACG-1	7.49866
E14.5_EYFP_TGTGATCAGTTAGACC-1	6.53886
E14.5_EYFP_TGTGGAGCAAACGGGC-1	6.52334
E14.5_EYFP_TGTGGAGCAGTAAAGC-1	7.24753
E14.5_EYFP_TGTGTGAGTCCTTCAG-1	4.17434
E14.5_EYFP_TGTTGTGCAACTAGCC-1	2.52402
E14.5_EYFP_TGTTGTGCATGTTGTG-1	5.26529
E14.5_EYFP_TTAAAGGCAACAGGAT-1	6.53891
E14.5_EYFP_TTAGCAGGTTATTGCC-1	7.38814
E14.5_EYFP_TTATTGCTCCCTGACT-1	3.25393
E14.5_EYFP_TTCAACCGTTTGCGAA-1	5.24803
E14.5_EYFP_TTCCTCAAGCATGTCG-1	4.25381
E14.5_EYFP_TTCTTAGGTTAGCCAA-1	0.861747
E14.5_EYFP_TTGCACACACTAAATC-1	6.53897
E14.5_EYFP_TTGCGAGTCGTAATCA-1	7.62435
E14.5_EYFP_TTGTGCCTCTGTGCAG-1	4.81334
E14.5_EYFP_TTTAAGGTCTGTGCAG-1	2.26985
E14.5_EYFP_TTTCCGGGTCCTTTAA-1	4.78031
E14.5_EYFP_TTTGACTTCATAACTG-1	6.56123
E14.5_EYFP_TTTGTGTTCGAGGAGT-1	5.54317

## Sheet: trajectory_lineages
	orig.ident	nCount_RNA	nFeature_RNA	stage	cell	percent.mt	S.Score	G2M.Score	Phase	old.ident	nCount_SCT	nFeature_SCT	SCT_snn_res.1	seurat_clusters	sub.cluster	integration	method	sub.cluster.Fluidigm	nCount_ATAC	nFeature_ATAC	nCount_spliced	nFeature_spliced	nCount_unspliced	nFeature_unspliced	nCount_ambiguous	nFeature_ambiguous	nucleosome_signal	nucleosome_percentile	TSS.enrichment	TSS.percentile	SCT.weight	ATAC.weight	wsnn_res.1	sub.cluster.10x	integrated_snn_res.0.5	ident	trajectory	pseudotime
C108	10	2694096	7983	E17.5	C108	0.0237	-171.179	-284.166	G1	Seuratcds	1213760	6719	10	1	10	C1_10	C1	10	NA	NA	NA	NA	NA	NA	NA	NA	NA	NA	NA	NA	NA	NA	NA	NA	1	1	lineage1	8.68367
C119	4	172593	6546	E17.5	C119	0.0335993	-3.98882	-14.2059	G1	Seuratcds	1182785	6644	4	1	4_0	C1_4_0	C1	4_0	NA	NA	NA	NA	NA	NA	NA	NA	NA	NA	NA	NA	NA	NA	NA	NA	1	1	lineage1	8.68373
C122	4	152731	6998	E17.5	C122	0.0658151	-7.43984	-12.4105	G1	Seuratcds	1159895	7085	4	1	4_0	C1_4_0	C1	4_0	NA	NA	NA	NA	NA	NA	NA	NA	NA	NA	NA	NA	NA	NA	NA	NA	1	1	lineage1	8.68378
C136	4	1033946	7975	E17.5	C136	0.0375813	-76.2819	-94.2532	G1	Seuratcds	1202248	7969	4	1	4_0	C1_4_0	C1	4_0	NA	NA	NA	NA	NA	NA	NA	NA	NA	NA	NA	NA	NA	NA	NA	NA	1	1	lineage1	8.68384
C139	10	1582205	6690	E17.5	C139	0.026324	-94.7948	-154.691	G1	Seuratcds	1208092	6687	10	1	10	C1_10	C1	10	NA	NA	NA	NA	NA	NA	NA	NA	NA	NA	NA	NA	NA	NA	NA	NA	1	1	lineage1	8.6839
C141	4	1239380	7241	E17.5	C141	0.0239967	-69.9409	-145.226	G1	Seuratcds	1204560	7231	4	1	4_0	C1_4_0	C1	4_0	NA	NA	NA	NA	NA	NA	NA	NA	NA	NA	NA	NA	NA	NA	NA	NA	1	1	lineage1	8.43254
C143	4	502012	8412	E17.5	C143	0.0197585	-43.6714	23.8848	G2M	Seuratcds	1180646	8406	4	5	4_1	C1_4_1	C1	4_1	NA	NA	NA	NA	NA	NA	NA	NA	NA	NA	NA	NA	NA	NA	NA	NA	5	5	lineage1	6.53655
C154	10	2044269	7528	E17.5	C154	0.0224706	-58.2701	-179.24	G1	Seuratcds	1207844	7511	10	1	10	C1_10	C1	10	NA	NA	NA	NA	NA	NA	NA	NA	NA	NA	NA	NA	NA	NA	NA	NA	1	1	lineage1	8.68396
C157	4	1444664	7392	E17.5	C157	0.0343028	-90.586	-167.346	G1	Seuratcds	1205533	7380	4	1	4_0	C1_4_0	C1	4_0	NA	NA	NA	NA	NA	NA	NA	NA	NA	NA	NA	NA	NA	NA	NA	NA	1	1	lineage1	8.68401
C168	4	71923	6503	E17.5	C168	0.0326599	7.32164	-0.0537159	S	Seuratcds	1171759	10146	4	5	4_0	C1_4_0	C1	4_0	NA	NA	NA	NA	NA	NA	NA	NA	NA	NA	NA	NA	NA	NA	NA	NA	5	5	lineage1	7.84494
C170	4	1764445	8394	E17.5	C170	0.0232396	-98.6526	492.073	G2M	Seuratcds	1206931	8362	4	1	4_0	C1_4_0	C1	4_0	NA	NA	NA	NA	NA	NA	NA	NA	NA	NA	NA	NA	NA	NA	NA	NA	1	1	lineage1	8.68407
C172	4	1496313	7623	E17.5	C172	0.0411251	40.5151	-142.358	S	Seuratcds	1207323	7615	4	1	4_0	C1_4_0	C1	4_0	NA	NA	NA	NA	NA	NA	NA	NA	NA	NA	NA	NA	NA	NA	NA	NA	1	1	lineage1	8.68413
C187	10	402084	7110	E17.5	C187	0.0378876	25.1504	5.56478	S	Seuratcds	1192172	7081	10	1	10	C1_10	C1	10	NA	NA	NA	NA	NA	NA	NA	NA	NA	NA	NA	NA	NA	NA	NA	NA	1	1	lineage1	8.42875
C189	4	289487	7229	E17.5	C189	0.0433422	-15.1275	-31.4956	G1	Seuratcds	1192282	7224	4	1	4_0	C1_4_0	C1	4_0	NA	NA	NA	NA	NA	NA	NA	NA	NA	NA	NA	NA	NA	NA	NA	NA	1	1	lineage1	8.52992
C201	10	1717288	5128	E17.5	C201	0.0261977	-108.02	-196.018	G1	Seuratcds	1207568	5107	10	1	10	C1_10	C1	10	NA	NA	NA	NA	NA	NA	NA	NA	NA	NA	NA	NA	NA	NA	NA	NA	1	1	lineage1	7.61303
C212	10	2831742	4357	E17.5	C212	0.0334755	-214.842	-309.807	G1	Seuratcds	1209511	3913	10	1	10	C1_10	C1	10	NA	NA	NA	NA	NA	NA	NA	NA	NA	NA	NA	NA	NA	NA	NA	NA	1	1	lineage1	7.83572
C220	10	1994103	3999	E17.5	C220	0.0312837	-128.495	-219.821	G1	Seuratcds	1205943	3987	10	1	10	C1_10	C1	10	NA	NA	NA	NA	NA	NA	NA	NA	NA	NA	NA	NA	NA	NA	NA	NA	1	1	lineage1	6.56353
C224	10	2468640	4691	E17.5	C224	0.0311017	-165.869	-303.353	G1	Seuratcds	1209500	4148	10	1	10	C1_10	C1	10	NA	NA	NA	NA	NA	NA	NA	NA	NA	NA	NA	NA	NA	NA	NA	NA	1	1	lineage1	7.64204
C227	2	270059	3261	E17.5	C227	0.0288641	-1.1653	-27.7405	G1	Seuratcds	1168314	3579	2	1	2_1	C1_2_1	C1	2_1	NA	NA	NA	NA	NA	NA	NA	NA	NA	NA	NA	NA	NA	NA	NA	NA	1	1	lineage1	7.61309
C237	10	1958227	5980	E17.5	C237	0.0288817	336.223	-98.9148	S	Seuratcds	1207598	5961	10	1	10	C1_10	C1	10	NA	NA	NA	NA	NA	NA	NA	NA	NA	NA	NA	NA	NA	NA	NA	NA	1	1	lineage1	8.68419
C240	10	2013088	4658	E17.5	C240	0.0311208	-114.43	-202.512	G1	Seuratcds	1208569	4646	10	1	10	C1_10	C1	10	NA	NA	NA	NA	NA	NA	NA	NA	NA	NA	NA	NA	NA	NA	NA	NA	1	1	lineage1	8.54778
C249	2	232223	3388	E17.5	C249	0.0361291	-19.3203	-22.0579	G1	Seuratcds	1181635	3806	2	1	2_1	C1_2_1	C1	2_1	NA	NA	NA	NA	NA	NA	NA	NA	NA	NA	NA	NA	NA	NA	NA	NA	1	1	lineage1	7.8072
C262	2	133793	2862	E17.5	C262	0.0329614	7.17358	-1.35271	S	Seuratcds	1163305	5145	2	1	2_1	C1_2_1	C1	2_1	NA	NA	NA	NA	NA	NA	NA	NA	NA	NA	NA	NA	NA	NA	NA	NA	1	1	lineage1	7.86526
C333	1	677980	4194	E14.5	C333	0.0216496	-34.9259	-52.2463	G1	Seuratcds	1191721	4175	1	5	1	C1_1	C1	1	NA	NA	NA	NA	NA	NA	NA	NA	NA	NA	NA	NA	NA	NA	NA	NA	5	5	lineage1	4.46616
C335	1	166187	2442	E14.5	C335	0.0357188	-15.0952	-17.5916	G1	Seuratcds	1183125	3624	1	5	1	C1_1	C1	1	NA	NA	NA	NA	NA	NA	NA	NA	NA	NA	NA	NA	NA	NA	NA	NA	5	5	lineage1	3.82426
C355	1	555423	2869	E14.5	C355	0.0315867	-48.5608	-57.7011	G1	Seuratcds	1196611	2880	1	0	1	C1_1	C1	1	NA	NA	NA	NA	NA	NA	NA	NA	NA	NA	NA	NA	NA	NA	NA	NA	0	0	lineage1	2.95571
C364	9	406106	5573	E14.5	C364	0.0194358	-32.4699	-37.5562	G1	Seuratcds	1179662	5557	9	5	9	C1_9	C1	9	NA	NA	NA	NA	NA	NA	NA	NA	NA	NA	NA	NA	NA	NA	NA	NA	5	5	lineage1	6.55234
C366	9	198084	2735	E14.5	C366	0.0238586	-12.2878	86.195	G2M	Seuratcds	1187628	3469	9	5	9	C1_9	C1	9	NA	NA	NA	NA	NA	NA	NA	NA	NA	NA	NA	NA	NA	NA	NA	NA	5	5	lineage1	2.99556
C370	9	700654	5156	E14.5	C370	0.0226817	-25.8059	-78.4972	G1	Seuratcds	1198068	5142	9	1	9	C1_9	C1	9	NA	NA	NA	NA	NA	NA	NA	NA	NA	NA	NA	NA	NA	NA	NA	NA	1	1	lineage1	6.55642
C377	1	436900	3511	E14.5	C377	0.031149	72.7881	-3.43153	S	Seuratcds	1193865	3542	1	0	1	C1_1	C1	1	NA	NA	NA	NA	NA	NA	NA	NA	NA	NA	NA	NA	NA	NA	NA	NA	0	0	lineage1	2.95577
C403	3	124983	2041	E14.5	C403	0.0552155	-13.7468	1.85712	G2M	Seuratcds	1179374	5122	3	0	3	C1_3	C1	3	NA	NA	NA	NA	NA	NA	NA	NA	NA	NA	NA	NA	NA	NA	NA	NA	0	0	lineage1	0.59828
C406	10	765765	4836	E14.5	C406	0.0429139	26.8813	-80.4144	S	Seuratcds	1201523	4819	10	1	10	C1_10	C1	10	NA	NA	NA	NA	NA	NA	NA	NA	NA	NA	NA	NA	NA	NA	NA	NA	1	1	lineage1	6.53661
C407	8	498029	3141	E14.5	C407	0.0353453	-36.5992	-32.5737	G1	Seuratcds	1194947	3148	8	5	8	C1_8	C1	8	NA	NA	NA	NA	NA	NA	NA	NA	NA	NA	NA	NA	NA	NA	NA	NA	5	5	lineage1	2.73002
C409	5	1291146	4555	E14.5	C409	0.0266538	-89.7598	-142.787	G1	Seuratcds	1203668	4539	5	5	5	C1_5	C1	5	NA	NA	NA	NA	NA	NA	NA	NA	NA	NA	NA	NA	NA	NA	NA	NA	5	5	lineage1	5.03677
C417	6	749068	5189	E14.5	C417	0.0294045	-37.749	-79.0999	G1	Seuratcds	1201036	5181	6	5	6	C1_6	C1	6	NA	NA	NA	NA	NA	NA	NA	NA	NA	NA	NA	NA	NA	NA	NA	NA	5	5	lineage1	2.74653
C420	5	568749	4980	E14.5	C420	0.0353724	-27.1678	-31.8384	G1	Seuratcds	1198601	4971	5	5	5	C1_5	C1	5	NA	NA	NA	NA	NA	NA	NA	NA	NA	NA	NA	NA	NA	NA	NA	NA	5	5	lineage1	2.68786
C431	8	1387195	3764	E14.5	C431	0.0184639	-114.936	-145.85	G1	Seuratcds	1205474	3758	8	0	8	C1_8	C1	8	NA	NA	NA	NA	NA	NA	NA	NA	NA	NA	NA	NA	NA	NA	NA	NA	0	0	lineage1	0.397967
C436	8	357158	3173	E14.5	C436	0.033425	-13.9976	-35.5302	G1	Seuratcds	1191845	3251	8	5	8	C1_8	C1	8	NA	NA	NA	NA	NA	NA	NA	NA	NA	NA	NA	NA	NA	NA	NA	NA	5	5	lineage1	2.67331
C454	6	1205699	3810	E14.5	C454	0.024259	-73.5038	-106.827	G1	Seuratcds	1204658	3804	6	5	6	C1_6	C1	6	NA	NA	NA	NA	NA	NA	NA	NA	NA	NA	NA	NA	NA	NA	NA	NA	5	5	lineage1	3.77975
C455	5	850353	3207	E14.5	C455	0.0320196	-27.0467	-93.5283	G1	Seuratcds	1201996	3205	5	5	5	C1_5	C1	5	NA	NA	NA	NA	NA	NA	NA	NA	NA	NA	NA	NA	NA	NA	NA	NA	5	5	lineage1	5.65398
C457	5	473471	4239	E14.5	C457	0.0421779	10.5008	-49.654	S	Seuratcds	1193031	4231	5	5	5	C1_5	C1	5	NA	NA	NA	NA	NA	NA	NA	NA	NA	NA	NA	NA	NA	NA	NA	NA	5	5	lineage1	5.50462
C461	5	249901	3127	E14.5	C461	0.0368026	-15.3854	-25.254	G1	Seuratcds	1191955	3437	5	5	5	C1_5	C1	5	NA	NA	NA	NA	NA	NA	NA	NA	NA	NA	NA	NA	NA	NA	NA	NA	5	5	lineage1	4.36025
C477	6	883510	5352	E14.5	C477	0.0255843	169.066	78.206	S	Seuratcds	1201119	5338	6	5	6	C1_6	C1	6	NA	NA	NA	NA	NA	NA	NA	NA	NA	NA	NA	NA	NA	NA	NA	NA	5	5	lineage1	5.13097
C485	1	732395	3313	E14.5	C485	0.0318025	-46.7574	-71.457	G1	Seuratcds	1198077	3306	1	5	1	C1_1	C1	1	NA	NA	NA	NA	NA	NA	NA	NA	NA	NA	NA	NA	NA	NA	NA	NA	5	5	lineage1	4.9478
C486	5	1357367	4183	E14.5	C486	0.0256298	-73.741	-136.261	G1	Seuratcds	1204000	4174	5	0	5	C1_5	C1	5	NA	NA	NA	NA	NA	NA	NA	NA	NA	NA	NA	NA	NA	NA	NA	NA	0	0	lineage1	0.0382175
C492	6	1168441	4625	E14.5	C492	0.0235331	227.269	256.461	G2M	Seuratcds	1203238	4616	6	5	6	C1_6	C1	6	NA	NA	NA	NA	NA	NA	NA	NA	NA	NA	NA	NA	NA	NA	NA	NA	5	5	lineage1	5.47551
C513	3	321428	3711	E11.5	C513	0.0943602	-5.99855	8.08461	G2M	Seuratcds	1182814	3777	3	0	3	C1_3	C1	3	NA	NA	NA	NA	NA	NA	NA	NA	NA	NA	NA	NA	NA	NA	NA	NA	0	0	lineage1	0.390077
C524	3	1108452	3978	E11.5	C524	0.055979	-80.283	-77.6857	G1	Seuratcds	1203330	3970	3	0	3	C1_3	C1	3	NA	NA	NA	NA	NA	NA	NA	NA	NA	NA	NA	NA	NA	NA	NA	NA	0	0	lineage1	0
C525	3	693708	3539	E11.5	C525	0.0317843	-52.3036	-77.6601	G1	Seuratcds	1196542	3526	3	0	3	C1_3	C1	3	NA	NA	NA	NA	NA	NA	NA	NA	NA	NA	NA	NA	NA	NA	NA	NA	0	0	lineage1	1.69501
C527	5	1436158	4200	E11.5	C527	0.0436686	-107.894	-100.767	G1	Seuratcds	1205560	4190	5	5	5	C1_5	C1	5	NA	NA	NA	NA	NA	NA	NA	NA	NA	NA	NA	NA	NA	NA	NA	NA	5	5	lineage1	5.37047
C546	3	193145	3755	E11.5	C546	0.0943281	2.9971	-17.2622	S	Seuratcds	1175405	4331	3	0	3	C1_3	C1	3	NA	NA	NA	NA	NA	NA	NA	NA	NA	NA	NA	NA	NA	NA	NA	NA	0	0	lineage1	0.558999
C551	12	356816	2996	E11.5	C551	0.0536019	28.3168	11.02	S	Seuratcds	1186266	3101	12	5	12	C1_12	C1	12	NA	NA	NA	NA	NA	NA	NA	NA	NA	NA	NA	NA	NA	NA	NA	NA	5	5	lineage1	4.20406
C555	5	283158	3324	E11.5	C555	0.0693005	-10.9175	4.20196	G2M	Seuratcds	1181798	3528	5	0	5	C1_5	C1	5	NA	NA	NA	NA	NA	NA	NA	NA	NA	NA	NA	NA	NA	NA	NA	NA	0	0	lineage1	2.90924
C558	3	1898728	3976	E11.5	C558	0.0298942	-107.019	-199.271	G1	Seuratcds	1207433	3966	3	0	3	C1_3	C1	3	NA	NA	NA	NA	NA	NA	NA	NA	NA	NA	NA	NA	NA	NA	NA	NA	0	0	lineage1	0.0104633
C562	5	1864700	4888	E11.5	C562	0.0382555	-71.8528	400.358	G2M	Seuratcds	1207511	4875	5	5	5	C1_5	C1	5	NA	NA	NA	NA	NA	NA	NA	NA	NA	NA	NA	NA	NA	NA	NA	NA	5	5	lineage1	5.06229
C567	3	370415	3600	E11.5	C567	0.0589312	-8.14525	-41.5097	G1	Seuratcds	1185440	3650	3	0	3	C1_3	C1	3	NA	NA	NA	NA	NA	NA	NA	NA	NA	NA	NA	NA	NA	NA	NA	NA	0	0	lineage1	0.598338
C569	3	343548	3392	E11.5	C569	0.0777126	-11.4367	-50.8661	G1	Seuratcds	1185938	3448	3	0	3	C1_3	C1	3	NA	NA	NA	NA	NA	NA	NA	NA	NA	NA	NA	NA	NA	NA	NA	NA	0	0	lineage1	0.323763
C575	3	411561	4404	E11.5	C575	0.0519364	-32.4962	-41.088	G1	Seuratcds	1189978	4398	3	0	3	C1_3	C1	3	NA	NA	NA	NA	NA	NA	NA	NA	NA	NA	NA	NA	NA	NA	NA	NA	0	0	lineage1	0.0666116
C580	5	1909353	4722	E11.5	C580	0.0338649	-140.678	-217.221	G1	Seuratcds	1209489	4706	5	0	5	C1_5	C1	5	NA	NA	NA	NA	NA	NA	NA	NA	NA	NA	NA	NA	NA	NA	NA	NA	0	0	lineage1	0.0381599
C603	3	1625081	3548	E12.5	C603	0.032999	-75.092	-160.555	G1	Seuratcds	1205809	3504	3	0	3	C1_3	C1	3	NA	NA	NA	NA	NA	NA	NA	NA	NA	NA	NA	NA	NA	NA	NA	NA	0	0	lineage1	0.0381023
C605	0	2239123	3910	E12.5	C605	0.0300689	320.159	-164.517	S	Seuratcds	1209386	3847	0	0	0	C1_0	C1	0	NA	NA	NA	NA	NA	NA	NA	NA	NA	NA	NA	NA	NA	NA	NA	NA	0	0	lineage1	0.056288
C619	5	1430454	3881	E12.5	C619	0.0246397	41.4176	-109.62	S	Seuratcds	1205242	3873	5	0	5	C1_5	C1	5	NA	NA	NA	NA	NA	NA	NA	NA	NA	NA	NA	NA	NA	NA	NA	NA	0	0	lineage1	0.0380446
C627	0	2045707	5067	E12.5	C627	0.0222969	-99.502	293.662	G2M	Seuratcds	1214251	5051	0	0	0	C1_0	C1	0	NA	NA	NA	NA	NA	NA	NA	NA	NA	NA	NA	NA	NA	NA	NA	NA	0	0	lineage1	0.037987
C630	3	967249	2923	E12.5	C630	0.0304182	-36.929	-16.805	G1	Seuratcds	1201847	2888	3	0	3	C1_3	C1	3	NA	NA	NA	NA	NA	NA	NA	NA	NA	NA	NA	NA	NA	NA	NA	NA	0	0	lineage1	0.0179889
C643	6	2317401	2439	E12.5	C643	0.0260076	-126.679	-272.514	G1	Seuratcds	1211848	2321	6	5	6	C1_6	C1	6	NA	NA	NA	NA	NA	NA	NA	NA	NA	NA	NA	NA	NA	NA	NA	NA	5	5	lineage1	5.41015
C661	3	381727	2202	E12.5	C661	0.0436464	-23.8484	-33.7904	G1	Seuratcds	1191747	2327	3	5	3	C1_3	C1	3	NA	NA	NA	NA	NA	NA	NA	NA	NA	NA	NA	NA	NA	NA	NA	NA	5	5	lineage1	4.25179
C662	6	2129493	3118	E12.5	C662	0.0181517	-97.2209	-178.029	G1	Seuratcds	1213378	3092	6	5	6	C1_6	C1	6	NA	NA	NA	NA	NA	NA	NA	NA	NA	NA	NA	NA	NA	NA	NA	NA	5	5	lineage1	4.46512
C668	6	1935834	4468	E12.5	C668	0.0257584	-193.937	-179.458	G1	Seuratcds	1216019	4458	6	5	6	C1_6	C1	6	NA	NA	NA	NA	NA	NA	NA	NA	NA	NA	NA	NA	NA	NA	NA	NA	5	5	lineage1	2.66607
C673	3	745702	2416	E12.5	C673	0.0328617	65.5304	-57.2305	S	Seuratcds	1200454	2412	3	0	3	C1_3	C1	3	NA	NA	NA	NA	NA	NA	NA	NA	NA	NA	NA	NA	NA	NA	NA	NA	0	0	lineage1	0.0923625
C708	8	1224279	4840	E12.5	C708	0.0374326	-71.3099	-143.528	G1	Seuratcds	1203827	4829	8	5	8	C1_8	C1	8	NA	NA	NA	NA	NA	NA	NA	NA	NA	NA	NA	NA	NA	NA	NA	NA	5	5	lineage1	2.71965
C709	5	944915	4791	E12.5	C709	0.0375039	-41.4935	343.152	G2M	Seuratcds	1201380	4781	5	0	5	C1_5	C1	5	NA	NA	NA	NA	NA	NA	NA	NA	NA	NA	NA	NA	NA	NA	NA	NA	0	0	lineage1	0.0379294
C711	3	114281	2213	E12.5	C711	0.0485558	-8.47448	-15.6766	G1	Seuratcds	1168490	5848	3	5	3	C1_3	C1	3	NA	NA	NA	NA	NA	NA	NA	NA	NA	NA	NA	NA	NA	NA	NA	NA	5	5	lineage1	4.52897
C712	5	824221	3353	E12.5	C712	0.0452876	-40.4246	-75.1663	G1	Seuratcds	1199646	3345	5	5	5	C1_5	C1	5	NA	NA	NA	NA	NA	NA	NA	NA	NA	NA	NA	NA	NA	NA	NA	NA	5	5	lineage1	2.90581
C713	6	2100946	6127	E12.5	C713	0.0309046	-34.2923	-158.405	G1	Seuratcds	1207344	6108	6	5	6	C1_6	C1	6	NA	NA	NA	NA	NA	NA	NA	NA	NA	NA	NA	NA	NA	NA	NA	NA	5	5	lineage1	4.06923
C715	6	1166452	4017	E12.5	C715	0.0275108	-82.1502	-103.358	G1	Seuratcds	1202978	4004	6	5	6	C1_6	C1	6	NA	NA	NA	NA	NA	NA	NA	NA	NA	NA	NA	NA	NA	NA	NA	NA	5	5	lineage1	3.02111
C716	6	1037985	7268	E12.5	C716	0.0343579	95.5612	-2.27665	S	Seuratcds	1201737	7244	6	5	6	C1_6	C1	6	NA	NA	NA	NA	NA	NA	NA	NA	NA	NA	NA	NA	NA	NA	NA	NA	5	5	lineage1	2.77472
C721	6	833652	5428	E12.5	C721	0.028687	-63.1057	-83.1831	G1	Seuratcds	1198057	5413	6	5	6	C1_6	C1	6	NA	NA	NA	NA	NA	NA	NA	NA	NA	NA	NA	NA	NA	NA	NA	NA	5	5	lineage1	2.78607
C722	5	1248649	6631	E12.5	C722	0.0773524	-33.6124	-60.3212	G1	Seuratcds	1201766	6591	5	5	5	C1_5	C1	5	NA	NA	NA	NA	NA	NA	NA	NA	NA	NA	NA	NA	NA	NA	NA	NA	5	5	lineage1	6.56174
C723	6	1226376	4771	E12.5	C723	0.0319347	-83.544	-105.514	G1	Seuratcds	1200939	4709	6	5	6	C1_6	C1	6	NA	NA	NA	NA	NA	NA	NA	NA	NA	NA	NA	NA	NA	NA	NA	NA	5	5	lineage1	3.02789
C726	8	1318682	4230	E12.5	C726	0.0411145	-94.7184	-141.616	G1	Seuratcds	1205129	4208	8	5	8	C1_8	C1	8	NA	NA	NA	NA	NA	NA	NA	NA	NA	NA	NA	NA	NA	NA	NA	NA	5	5	lineage1	2.66612
C727	6	1757070	6184	E12.5	C727	0.0279579	233.707	-123.999	S	Seuratcds	1208113	6177	6	5	6	C1_6	C1	6	NA	NA	NA	NA	NA	NA	NA	NA	NA	NA	NA	NA	NA	NA	NA	NA	5	5	lineage1	4.13953
C728	8	1365528	5044	E12.5	C728	0.0328415	-91.4619	-128.045	G1	Seuratcds	1202959	5030	8	0	8	C1_8	C1	8	NA	NA	NA	NA	NA	NA	NA	NA	NA	NA	NA	NA	NA	NA	NA	NA	0	0	lineage1	1.76893
C729	6	1596522	4918	E12.5	C729	0.0255424	-94.2786	-167.343	G1	Seuratcds	1206615	4900	6	5	6	C1_6	C1	6	NA	NA	NA	NA	NA	NA	NA	NA	NA	NA	NA	NA	NA	NA	NA	NA	5	5	lineage1	2.99422
C739	1	1914783	5916	E12.5	C739	0.0305737	102.838	-174.526	S	Seuratcds	1206983	5894	1	1	1	C1_1	C1	1	NA	NA	NA	NA	NA	NA	NA	NA	NA	NA	NA	NA	NA	NA	NA	NA	1	1	lineage1	5.61539
C740	6	1221227	5368	E12.5	C740	0.0369276	-72.8725	-105.005	G1	Seuratcds	1203763	5343	6	5	6	C1_6	C1	6	NA	NA	NA	NA	NA	NA	NA	NA	NA	NA	NA	NA	NA	NA	NA	NA	5	5	lineage1	3.02292
C743	6	1290172	3897	E12.5	C743	0.0252594	-97.9865	-144.749	G1	Seuratcds	1204736	3886	6	0	6	C1_6	C1	6	NA	NA	NA	NA	NA	NA	NA	NA	NA	NA	NA	NA	NA	NA	NA	NA	0	0	lineage1	2.91186
C744	5	1345220	4264	E12.5	C744	0.0376652	-97.4246	-131.411	G1	Seuratcds	1204593	4255	5	5	5	C1_5	C1	5	NA	NA	NA	NA	NA	NA	NA	NA	NA	NA	NA	NA	NA	NA	NA	NA	5	5	lineage1	4.94785
C755	5	1845417	6547	E12.5	C755	0.0723538	86.4923	-38.2367	S	Seuratcds	1204683	6504	5	0	5	C1_5	C1	5	NA	NA	NA	NA	NA	NA	NA	NA	NA	NA	NA	NA	NA	NA	NA	NA	0	0	lineage1	2.99562
C757	12	1384264	4117	E12.5	C757	0.0399006	-76.6544	-125.446	G1	Seuratcds	1206086	4104	12	0	12	C1_12	C1	12	NA	NA	NA	NA	NA	NA	NA	NA	NA	NA	NA	NA	NA	NA	NA	NA	0	0	lineage1	0.110869
C766	6	2132323	4653	E12.5	C766	0.0228971	-118.337	-191.803	G1	Seuratcds	1210689	4638	6	5	6	C1_6	C1	6	NA	NA	NA	NA	NA	NA	NA	NA	NA	NA	NA	NA	NA	NA	NA	NA	5	5	lineage1	4.46622
C769	6	1338401	4115	E12.5	C769	0.0394	-12.6412	-122.48	G1	Seuratcds	1205122	4109	6	5	6	C1_6	C1	6	NA	NA	NA	NA	NA	NA	NA	NA	NA	NA	NA	NA	NA	NA	NA	NA	5	5	lineage1	3.01832
C772	0	1993318	6241	E12.5	C772	0.0273975	67.0006	590.988	G2M	Seuratcds	1208369	6226	0	0	0	C1_0	C1	0	NA	NA	NA	NA	NA	NA	NA	NA	NA	NA	NA	NA	NA	NA	NA	NA	0	0	lineage1	0.0378717
C780	6	1953638	6073	E12.5	C780	0.0245931	208.668	124.05	S	Seuratcds	1208760	6058	6	5	6	C1_6	C1	6	NA	NA	NA	NA	NA	NA	NA	NA	NA	NA	NA	NA	NA	NA	NA	NA	5	5	lineage1	5.56466
C781	5	1113091	4992	E12.5	C781	0.0344734	-76.7115	-106.056	G1	Seuratcds	1203540	4963	5	5	5	C1_5	C1	5	NA	NA	NA	NA	NA	NA	NA	NA	NA	NA	NA	NA	NA	NA	NA	NA	5	5	lineage1	4.23496
C784	3	762152	3054	E12.5	C784	0.0590302	-42.7957	-73.5416	G1	Seuratcds	1197317	3043	3	0	3	C1_3	C1	3	NA	NA	NA	NA	NA	NA	NA	NA	NA	NA	NA	NA	NA	NA	NA	NA	0	0	lineage1	0.0446189
C118	2	1533087	8076	E17.5	C118	0.0267154	-57.2508	-170.42	G1	Seuratcds	1206414	8052	2	6	2_1	C1_2_1	C1	2_1	NA	NA	NA	NA	NA	NA	NA	NA	NA	NA	NA	NA	NA	NA	NA	NA	6	6	lineage6	8.83888
C130	2	2217460	8031	E17.5	C130	0.025278	-146.001	-284.801	G1	Seuratcds	1207070	7997	2	6	2_0	C1_2_0	C1	2_0	NA	NA	NA	NA	NA	NA	NA	NA	NA	NA	NA	NA	NA	NA	NA	NA	6	6	lineage6	8.75797
C177	2	890420	7786	E17.5	C177	0.0292143	47.7439	-53.844	S	Seuratcds	1196594	7771	2	6	2_0	C1_2_0	C1	2_0	NA	NA	NA	NA	NA	NA	NA	NA	NA	NA	NA	NA	NA	NA	NA	NA	6	6	lineage6	8.84075
C208	2	208832	3188	E17.5	C208	0.0327823	-20.482	-20.2363	G1	Seuratcds	1166526	3815	2	1	2_1	C1_2_1	C1	2_1	NA	NA	NA	NA	NA	NA	NA	NA	NA	NA	NA	NA	NA	NA	NA	NA	1	1	lineage6	7.64831
C213	2	1990245	5036	E17.5	C213	0.0235046	-147.594	-175.499	G1	Seuratcds	1208477	5018	2	6	2_1	C1_2_1	C1	2_1	NA	NA	NA	NA	NA	NA	NA	NA	NA	NA	NA	NA	NA	NA	NA	NA	6	6	lineage6	8.83945
C239	2	817933	4726	E17.5	C239	0.0315295	-92.4	-55.8375	G1	Seuratcds	1187030	4712	2	6	2_1	C1_2_1	C1	2_1	NA	NA	NA	NA	NA	NA	NA	NA	NA	NA	NA	NA	NA	NA	NA	NA	6	6	lineage6	8.96181
C243	2	1480016	6441	E17.5	C243	0.0266477	-18.1198	-158.216	G1	Seuratcds	1204934	6424	2	6	2_1	C1_2_1	C1	2_1	NA	NA	NA	NA	NA	NA	NA	NA	NA	NA	NA	NA	NA	NA	NA	NA	6	6	lineage6	8.77211
C244	2	1249964	6783	E17.5	C244	0.0264392	130.448	112.932	S	Seuratcds	1203801	6762	2	6	2_1	C1_2_1	C1	2_1	NA	NA	NA	NA	NA	NA	NA	NA	NA	NA	NA	NA	NA	NA	NA	NA	6	6	lineage6	8.75803
C245	2	1162986	5064	E17.5	C245	0.0233864	-95.2244	-111.416	G1	Seuratcds	1202859	5049	2	6	2_1	C1_2_1	C1	2_1	NA	NA	NA	NA	NA	NA	NA	NA	NA	NA	NA	NA	NA	NA	NA	NA	6	6	lineage6	8.75809
C252	2	2946311	4751	E17.5	C252	0.0301764	-144.963	-350.97	G1	Seuratcds	1208768	4386	2	6	2_1	C1_2_1	C1	2_1	NA	NA	NA	NA	NA	NA	NA	NA	NA	NA	NA	NA	NA	NA	NA	NA	6	6	lineage6	9.0739
C253	2	1778832	3441	E17.5	C253	0.020487	-167.846	-221.839	G1	Seuratcds	1208562	3433	2	6	2_1	C1_2_1	C1	2_1	NA	NA	NA	NA	NA	NA	NA	NA	NA	NA	NA	NA	NA	NA	NA	NA	6	6	lineage6	8.94456
C278	2	34046	3085	E17.5	C278	0.0752805	-1.10258	-0.972978	G1	Seuratcds	1186666	12964	2	5	2_0	C1_2_0	C1	2_0	NA	NA	NA	NA	NA	NA	NA	NA	NA	NA	NA	NA	NA	NA	NA	NA	5	5	lineage6	8.96552
C281	2	1560028	3472	E17.5	C281	0.0207067	-144.209	-138.692	G1	Seuratcds	1209803	3461	2	6	2_1	C1_2_1	C1	2_1	NA	NA	NA	NA	NA	NA	NA	NA	NA	NA	NA	NA	NA	NA	NA	NA	6	6	lineage6	8.84047
C333	1	677980	4194	E14.5	C333	0.0216496	-34.9259	-52.2463	G1	Seuratcds	1191721	4175	1	5	1	C1_1	C1	1	NA	NA	NA	NA	NA	NA	NA	NA	NA	NA	NA	NA	NA	NA	NA	NA	5	5	lineage6	4.46616
C335	1	166187	2442	E14.5	C335	0.0357188	-15.0952	-17.5916	G1	Seuratcds	1183125	3624	1	5	1	C1_1	C1	1	NA	NA	NA	NA	NA	NA	NA	NA	NA	NA	NA	NA	NA	NA	NA	NA	5	5	lineage6	3.82426
C355	1	555423	2869	E14.5	C355	0.0315867	-48.5608	-57.7011	G1	Seuratcds	1196611	2880	1	0	1	C1_1	C1	1	NA	NA	NA	NA	NA	NA	NA	NA	NA	NA	NA	NA	NA	NA	NA	NA	0	0	lineage6	2.95571
C366	9	198084	2735	E14.5	C366	0.0238586	-12.2878	86.195	G2M	Seuratcds	1187628	3469	9	5	9	C1_9	C1	9	NA	NA	NA	NA	NA	NA	NA	NA	NA	NA	NA	NA	NA	NA	NA	NA	5	5	lineage6	2.99556
C377	1	436900	3511	E14.5	C377	0.031149	72.7881	-3.43153	S	Seuratcds	1193865	3542	1	0	1	C1_1	C1	1	NA	NA	NA	NA	NA	NA	NA	NA	NA	NA	NA	NA	NA	NA	NA	NA	0	0	lineage6	2.95577
C403	3	124983	2041	E14.5	C403	0.0552155	-13.7468	1.85712	G2M	Seuratcds	1179374	5122	3	0	3	C1_3	C1	3	NA	NA	NA	NA	NA	NA	NA	NA	NA	NA	NA	NA	NA	NA	NA	NA	0	0	lineage6	0.59828
C407	8	498029	3141	E14.5	C407	0.0353453	-36.5992	-32.5737	G1	Seuratcds	1194947	3148	8	5	8	C1_8	C1	8	NA	NA	NA	NA	NA	NA	NA	NA	NA	NA	NA	NA	NA	NA	NA	NA	5	5	lineage6	2.73002
C409	5	1291146	4555	E14.5	C409	0.0266538	-89.7598	-142.787	G1	Seuratcds	1203668	4539	5	5	5	C1_5	C1	5	NA	NA	NA	NA	NA	NA	NA	NA	NA	NA	NA	NA	NA	NA	NA	NA	5	5	lineage6	5.03677
C417	6	749068	5189	E14.5	C417	0.0294045	-37.749	-79.0999	G1	Seuratcds	1201036	5181	6	5	6	C1_6	C1	6	NA	NA	NA	NA	NA	NA	NA	NA	NA	NA	NA	NA	NA	NA	NA	NA	5	5	lineage6	2.74653
C420	5	568749	4980	E14.5	C420	0.0353724	-27.1678	-31.8384	G1	Seuratcds	1198601	4971	5	5	5	C1_5	C1	5	NA	NA	NA	NA	NA	NA	NA	NA	NA	NA	NA	NA	NA	NA	NA	NA	5	5	lineage6	2.68786
C431	8	1387195	3764	E14.5	C431	0.0184639	-114.936	-145.85	G1	Seuratcds	1205474	3758	8	0	8	C1_8	C1	8	NA	NA	NA	NA	NA	NA	NA	NA	NA	NA	NA	NA	NA	NA	NA	NA	0	0	lineage6	0.397967
C436	8	357158	3173	E14.5	C436	0.033425	-13.9976	-35.5302	G1	Seuratcds	1191845	3251	8	5	8	C1_8	C1	8	NA	NA	NA	NA	NA	NA	NA	NA	NA	NA	NA	NA	NA	NA	NA	NA	5	5	lineage6	2.67331
C454	6	1205699	3810	E14.5	C454	0.024259	-73.5038	-106.827	G1	Seuratcds	1204658	3804	6	5	6	C1_6	C1	6	NA	NA	NA	NA	NA	NA	NA	NA	NA	NA	NA	NA	NA	NA	NA	NA	5	5	lineage6	3.77975
C455	5	850353	3207	E14.5	C455	0.0320196	-27.0467	-93.5283	G1	Seuratcds	1201996	3205	5	5	5	C1_5	C1	5	NA	NA	NA	NA	NA	NA	NA	NA	NA	NA	NA	NA	NA	NA	NA	NA	5	5	lineage6	5.65398
C457	5	473471	4239	E14.5	C457	0.0421779	10.5008	-49.654	S	Seuratcds	1193031	4231	5	5	5	C1_5	C1	5	NA	NA	NA	NA	NA	NA	NA	NA	NA	NA	NA	NA	NA	NA	NA	NA	5	5	lineage6	5.50462
C461	5	249901	3127	E14.5	C461	0.0368026	-15.3854	-25.254	G1	Seuratcds	1191955	3437	5	5	5	C1_5	C1	5	NA	NA	NA	NA	NA	NA	NA	NA	NA	NA	NA	NA	NA	NA	NA	NA	5	5	lineage6	4.36025
C477	6	883510	5352	E14.5	C477	0.0255843	169.066	78.206	S	Seuratcds	1201119	5338	6	5	6	C1_6	C1	6	NA	NA	NA	NA	NA	NA	NA	NA	NA	NA	NA	NA	NA	NA	NA	NA	5	5	lineage6	5.13097
C485	1	732395	3313	E14.5	C485	0.0318025	-46.7574	-71.457	G1	Seuratcds	1198077	3306	1	5	1	C1_1	C1	1	NA	NA	NA	NA	NA	NA	NA	NA	NA	NA	NA	NA	NA	NA	NA	NA	5	5	lineage6	4.9478
C486	5	1357367	4183	E14.5	C486	0.0256298	-73.741	-136.261	G1	Seuratcds	1204000	4174	5	0	5	C1_5	C1	5	NA	NA	NA	NA	NA	NA	NA	NA	NA	NA	NA	NA	NA	NA	NA	NA	0	0	lineage6	0.0382175
C492	6	1168441	4625	E14.5	C492	0.0235331	227.269	256.461	G2M	Seuratcds	1203238	4616	6	5	6	C1_6	C1	6	NA	NA	NA	NA	NA	NA	NA	NA	NA	NA	NA	NA	NA	NA	NA	NA	5	5	lineage6	5.47551
C513	3	321428	3711	E11.5	C513	0.0943602	-5.99855	8.08461	G2M	Seuratcds	1182814	3777	3	0	3	C1_3	C1	3	NA	NA	NA	NA	NA	NA	NA	NA	NA	NA	NA	NA	NA	NA	NA	NA	0	0	lineage6	0.390077
C524	3	1108452	3978	E11.5	C524	0.055979	-80.283	-77.6857	G1	Seuratcds	1203330	3970	3	0	3	C1_3	C1	3	NA	NA	NA	NA	NA	NA	NA	NA	NA	NA	NA	NA	NA	NA	NA	NA	0	0	lineage6	0
C525	3	693708	3539	E11.5	C525	0.0317843	-52.3036	-77.6601	G1	Seuratcds	1196542	3526	3	0	3	C1_3	C1	3	NA	NA	NA	NA	NA	NA	NA	NA	NA	NA	NA	NA	NA	NA	NA	NA	0	0	lineage6	1.69501
C527	5	1436158	4200	E11.5	C527	0.0436686	-107.894	-100.767	G1	Seuratcds	1205560	4190	5	5	5	C1_5	C1	5	NA	NA	NA	NA	NA	NA	NA	NA	NA	NA	NA	NA	NA	NA	NA	NA	5	5	lineage6	5.37047
C546	3	193145	3755	E11.5	C546	0.0943281	2.9971	-17.2622	S	Seuratcds	1175405	4331	3	0	3	C1_3	C1	3	NA	NA	NA	NA	NA	NA	NA	NA	NA	NA	NA	NA	NA	NA	NA	NA	0	0	lineage6	0.558999
C551	12	356816	2996	E11.5	C551	0.0536019	28.3168	11.02	S	Seuratcds	1186266	3101	12	5	12	C1_12	C1	12	NA	NA	NA	NA	NA	NA	NA	NA	NA	NA	NA	NA	NA	NA	NA	NA	5	5	lineage6	4.20406
C555	5	283158	3324	E11.5	C555	0.0693005	-10.9175	4.20196	G2M	Seuratcds	1181798	3528	5	0	5	C1_5	C1	5	NA	NA	NA	NA	NA	NA	NA	NA	NA	NA	NA	NA	NA	NA	NA	NA	0	0	lineage6	2.90924
C558	3	1898728	3976	E11.5	C558	0.0298942	-107.019	-199.271	G1	Seuratcds	1207433	3966	3	0	3	C1_3	C1	3	NA	NA	NA	NA	NA	NA	NA	NA	NA	NA	NA	NA	NA	NA	NA	NA	0	0	lineage6	0.0104633
C562	5	1864700	4888	E11.5	C562	0.0382555	-71.8528	400.358	G2M	Seuratcds	1207511	4875	5	5	5	C1_5	C1	5	NA	NA	NA	NA	NA	NA	NA	NA	NA	NA	NA	NA	NA	NA	NA	NA	5	5	lineage6	5.06229
C567	3	370415	3600	E11.5	C567	0.0589312	-8.14525	-41.5097	G1	Seuratcds	1185440	3650	3	0	3	C1_3	C1	3	NA	NA	NA	NA	NA	NA	NA	NA	NA	NA	NA	NA	NA	NA	NA	NA	0	0	lineage6	0.598338
C569	3	343548	3392	E11.5	C569	0.0777126	-11.4367	-50.8661	G1	Seuratcds	1185938	3448	3	0	3	C1_3	C1	3	NA	NA	NA	NA	NA	NA	NA	NA	NA	NA	NA	NA	NA	NA	NA	NA	0	0	lineage6	0.323763
C575	3	411561	4404	E11.5	C575	0.0519364	-32.4962	-41.088	G1	Seuratcds	1189978	4398	3	0	3	C1_3	C1	3	NA	NA	NA	NA	NA	NA	NA	NA	NA	NA	NA	NA	NA	NA	NA	NA	0	0	lineage6	0.0666116
C580	5	1909353	4722	E11.5	C580	0.0338649	-140.678	-217.221	G1	Seuratcds	1209489	4706	5	0	5	C1_5	C1	5	NA	NA	NA	NA	NA	NA	NA	NA	NA	NA	NA	NA	NA	NA	NA	NA	0	0	lineage6	0.0381599
C603	3	1625081	3548	E12.5	C603	0.032999	-75.092	-160.555	G1	Seuratcds	1205809	3504	3	0	3	C1_3	C1	3	NA	NA	NA	NA	NA	NA	NA	NA	NA	NA	NA	NA	NA	NA	NA	NA	0	0	lineage6	0.0381023
C605	0	2239123	3910	E12.5	C605	0.0300689	320.159	-164.517	S	Seuratcds	1209386	3847	0	0	0	C1_0	C1	0	NA	NA	NA	NA	NA	NA	NA	NA	NA	NA	NA	NA	NA	NA	NA	NA	0	0	lineage6	0.056288
C619	5	1430454	3881	E12.5	C619	0.0246397	41.4176	-109.62	S	Seuratcds	1205242	3873	5	0	5	C1_5	C1	5	NA	NA	NA	NA	NA	NA	NA	NA	NA	NA	NA	NA	NA	NA	NA	NA	0	0	lineage6	0.0380446
C627	0	2045707	5067	E12.5	C627	0.0222969	-99.502	293.662	G2M	Seuratcds	1214251	5051	0	0	0	C1_0	C1	0	NA	NA	NA	NA	NA	NA	NA	NA	NA	NA	NA	NA	NA	NA	NA	NA	0	0	lineage6	0.037987
C630	3	967249	2923	E12.5	C630	0.0304182	-36.929	-16.805	G1	Seuratcds	1201847	2888	3	0	3	C1_3	C1	3	NA	NA	NA	NA	NA	NA	NA	NA	NA	NA	NA	NA	NA	NA	NA	NA	0	0	lineage6	0.0179889
C643	6	2317401	2439	E12.5	C643	0.0260076	-126.679	-272.514	G1	Seuratcds	1211848	2321	6	5	6	C1_6	C1	6	NA	NA	NA	NA	NA	NA	NA	NA	NA	NA	NA	NA	NA	NA	NA	NA	5	5	lineage6	5.41015
C661	3	381727	2202	E12.5	C661	0.0436464	-23.8484	-33.7904	G1	Seuratcds	1191747	2327	3	5	3	C1_3	C1	3	NA	NA	NA	NA	NA	NA	NA	NA	NA	NA	NA	NA	NA	NA	NA	NA	5	5	lineage6	4.25179
C662	6	2129493	3118	E12.5	C662	0.0181517	-97.2209	-178.029	G1	Seuratcds	1213378	3092	6	5	6	C1_6	C1	6	NA	NA	NA	NA	NA	NA	NA	NA	NA	NA	NA	NA	NA	NA	NA	NA	5	5	lineage6	4.46512
C668	6	1935834	4468	E12.5	C668	0.0257584	-193.937	-179.458	G1	Seuratcds	1216019	4458	6	5	6	C1_6	C1	6	NA	NA	NA	NA	NA	NA	NA	NA	NA	NA	NA	NA	NA	NA	NA	NA	5	5	lineage6	2.66607
C673	3	745702	2416	E12.5	C673	0.0328617	65.5304	-57.2305	S	Seuratcds	1200454	2412	3	0	3	C1_3	C1	3	NA	NA	NA	NA	NA	NA	NA	NA	NA	NA	NA	NA	NA	NA	NA	NA	0	0	lineage6	0.0923625
C708	8	1224279	4840	E12.5	C708	0.0374326	-71.3099	-143.528	G1	Seuratcds	1203827	4829	8	5	8	C1_8	C1	8	NA	NA	NA	NA	NA	NA	NA	NA	NA	NA	NA	NA	NA	NA	NA	NA	5	5	lineage6	2.71965
C709	5	944915	4791	E12.5	C709	0.0375039	-41.4935	343.152	G2M	Seuratcds	1201380	4781	5	0	5	C1_5	C1	5	NA	NA	NA	NA	NA	NA	NA	NA	NA	NA	NA	NA	NA	NA	NA	NA	0	0	lineage6	0.0379294
C711	3	114281	2213	E12.5	C711	0.0485558	-8.47448	-15.6766	G1	Seuratcds	1168490	5848	3	5	3	C1_3	C1	3	NA	NA	NA	NA	NA	NA	NA	NA	NA	NA	NA	NA	NA	NA	NA	NA	5	5	lineage6	4.52897
C712	5	824221	3353	E12.5	C712	0.0452876	-40.4246	-75.1663	G1	Seuratcds	1199646	3345	5	5	5	C1_5	C1	5	NA	NA	NA	NA	NA	NA	NA	NA	NA	NA	NA	NA	NA	NA	NA	NA	5	5	lineage6	2.90581
C713	6	2100946	6127	E12.5	C713	0.0309046	-34.2923	-158.405	G1	Seuratcds	1207344	6108	6	5	6	C1_6	C1	6	NA	NA	NA	NA	NA	NA	NA	NA	NA	NA	NA	NA	NA	NA	NA	NA	5	5	lineage6	4.06923
C715	6	1166452	4017	E12.5	C715	0.0275108	-82.1502	-103.358	G1	Seuratcds	1202978	4004	6	5	6	C1_6	C1	6	NA	NA	NA	NA	NA	NA	NA	NA	NA	NA	NA	NA	NA	NA	NA	NA	5	5	lineage6	3.02111
C716	6	1037985	7268	E12.5	C716	0.0343579	95.5612	-2.27665	S	Seuratcds	1201737	7244	6	5	6	C1_6	C1	6	NA	NA	NA	NA	NA	NA	NA	NA	NA	NA	NA	NA	NA	NA	NA	NA	5	5	lineage6	2.77472
C721	6	833652	5428	E12.5	C721	0.028687	-63.1057	-83.1831	G1	Seuratcds	1198057	5413	6	5	6	C1_6	C1	6	NA	NA	NA	NA	NA	NA	NA	NA	NA	NA	NA	NA	NA	NA	NA	NA	5	5	lineage6	2.78607
C723	6	1226376	4771	E12.5	C723	0.0319347	-83.544	-105.514	G1	Seuratcds	1200939	4709	6	5	6	C1_6	C1	6	NA	NA	NA	NA	NA	NA	NA	NA	NA	NA	NA	NA	NA	NA	NA	NA	5	5	lineage6	3.02789
C726	8	1318682	4230	E12.5	C726	0.0411145	-94.7184	-141.616	G1	Seuratcds	1205129	4208	8	5	8	C1_8	C1	8	NA	NA	NA	NA	NA	NA	NA	NA	NA	NA	NA	NA	NA	NA	NA	NA	5	5	lineage6	2.66612
C727	6	1757070	6184	E12.5	C727	0.0279579	233.707	-123.999	S	Seuratcds	1208113	6177	6	5	6	C1_6	C1	6	NA	NA	NA	NA	NA	NA	NA	NA	NA	NA	NA	NA	NA	NA	NA	NA	5	5	lineage6	4.13953
C728	8	1365528	5044	E12.5	C728	0.0328415	-91.4619	-128.045	G1	Seuratcds	1202959	5030	8	0	8	C1_8	C1	8	NA	NA	NA	NA	NA	NA	NA	NA	NA	NA	NA	NA	NA	NA	NA	NA	0	0	lineage6	1.76893
C729	6	1596522	4918	E12.5	C729	0.0255424	-94.2786	-167.343	G1	Seuratcds	1206615	4900	6	5	6	C1_6	C1	6	NA	NA	NA	NA	NA	NA	NA	NA	NA	NA	NA	NA	NA	NA	NA	NA	5	5	lineage6	2.99422
C739	1	1914783	5916	E12.5	C739	0.0305737	102.838	-174.526	S	Seuratcds	1206983	5894	1	1	1	C1_1	C1	1	NA	NA	NA	NA	NA	NA	NA	NA	NA	NA	NA	NA	NA	NA	NA	NA	1	1	lineage6	5.61539
C740	6	1221227	5368	E12.5	C740	0.0369276	-72.8725	-105.005	G1	Seuratcds	1203763	5343	6	5	6	C1_6	C1	6	NA	NA	NA	NA	NA	NA	NA	NA	NA	NA	NA	NA	NA	NA	NA	NA	5	5	lineage6	3.02292
C743	6	1290172	3897	E12.5	C743	0.0252594	-97.9865	-144.749	G1	Seuratcds	1204736	3886	6	0	6	C1_6	C1	6	NA	NA	NA	NA	NA	NA	NA	NA	NA	NA	NA	NA	NA	NA	NA	NA	0	0	lineage6	2.91186
C744	5	1345220	4264	E12.5	C744	0.0376652	-97.4246	-131.411	G1	Seuratcds	1204593	4255	5	5	5	C1_5	C1	5	NA	NA	NA	NA	NA	NA	NA	NA	NA	NA	NA	NA	NA	NA	NA	NA	5	5	lineage6	4.94785
C755	5	1845417	6547	E12.5	C755	0.0723538	86.4923	-38.2367	S	Seuratcds	1204683	6504	5	0	5	C1_5	C1	5	NA	NA	NA	NA	NA	NA	NA	NA	NA	NA	NA	NA	NA	NA	NA	NA	0	0	lineage6	2.99562
C757	12	1384264	4117	E12.5	C757	0.0399006	-76.6544	-125.446	G1	Seuratcds	1206086	4104	12	0	12	C1_12	C1	12	NA	NA	NA	NA	NA	NA	NA	NA	NA	NA	NA	NA	NA	NA	NA	NA	0	0	lineage6	0.110869
C766	6	2132323	4653	E12.5	C766	0.0228971	-118.337	-191.803	G1	Seuratcds	1210689	4638	6	5	6	C1_6	C1	6	NA	NA	NA	NA	NA	NA	NA	NA	NA	NA	NA	NA	NA	NA	NA	NA	5	5	lineage6	4.46622
C769	6	1338401	4115	E12.5	C769	0.0394	-12.6412	-122.48	G1	Seuratcds	1205122	4109	6	5	6	C1_6	C1	6	NA	NA	NA	NA	NA	NA	NA	NA	NA	NA	NA	NA	NA	NA	NA	NA	5	5	lineage6	3.01832
C772	0	1993318	6241	E12.5	C772	0.0273975	67.0006	590.988	G2M	Seuratcds	1208369	6226	0	0	0	C1_0	C1	0	NA	NA	NA	NA	NA	NA	NA	NA	NA	NA	NA	NA	NA	NA	NA	NA	0	0	lineage6	0.0378717
C775	5	1319616	4125	E12.5	C775	0.0381171	-83.115	-129.443	G1	Seuratcds	1204142	4114	5	5	5	C1_5	C1	5	NA	NA	NA	NA	NA	NA	NA	NA	NA	NA	NA	NA	NA	NA	NA	NA	5	5	lineage6	6.14454
C780	6	1953638	6073	E12.5	C780	0.0245931	208.668	124.05	S	Seuratcds	1208760	6058	6	5	6	C1_6	C1	6	NA	NA	NA	NA	NA	NA	NA	NA	NA	NA	NA	NA	NA	NA	NA	NA	5	5	lineage6	5.56466
C781	5	1113091	4992	E12.5	C781	0.0344734	-76.7115	-106.056	G1	Seuratcds	1203540	4963	5	5	5	C1_5	C1	5	NA	NA	NA	NA	NA	NA	NA	NA	NA	NA	NA	NA	NA	NA	NA	NA	5	5	lineage6	4.23496
C784	3	762152	3054	E12.5	C784	0.0590302	-42.7957	-73.5416	G1	Seuratcds	1197317	3043	3	0	3	C1_3	C1	3	NA	NA	NA	NA	NA	NA	NA	NA	NA	NA	NA	NA	NA	NA	NA	NA	0	0	lineage6	0.0446189
C112	9	1570080	7858	E17.5	C112	0.0240223	-62.1629	-47.8651	G1	Seuratcds	1207226	7839	9	3	9	C1_9	C1	9	NA	NA	NA	NA	NA	NA	NA	NA	NA	NA	NA	NA	NA	NA	NA	NA	3	3	lineage4	6.47757
C120	7	1707957	7638	E17.5	C120	0.0357351	-44.0842	59.6388	G2M	Seuratcds	1206332	7620	7	4	7	C1_7	C1	7	NA	NA	NA	NA	NA	NA	NA	NA	NA	NA	NA	NA	NA	NA	NA	NA	4	4	lineage4	6.47763
C121	7	1895457	7223	E17.5	C121	0.0291159	-102.328	-207.48	G1	Seuratcds	1207212	7208	7	4	7	C1_7	C1	7	NA	NA	NA	NA	NA	NA	NA	NA	NA	NA	NA	NA	NA	NA	NA	NA	4	4	lineage4	6.47769
C156	2	1699801	7732	E17.5	C156	0.0251759	-94.3699	-201.625	G1	Seuratcds	1207051	7719	2	4	2_0	C1_2_0	C1	2_0	NA	NA	NA	NA	NA	NA	NA	NA	NA	NA	NA	NA	NA	NA	NA	NA	4	4	lineage4	6.47774
C161	4	1274391	7261	E17.5	C161	0.0262957	-81.2075	-163.055	G1	Seuratcds	1204696	7246	4	4	4_1	C1_4_1	C1	4_1	NA	NA	NA	NA	NA	NA	NA	NA	NA	NA	NA	NA	NA	NA	NA	NA	4	4	lineage4	6.4778
C163	7	1724985	7333	E17.5	C163	0.0312669	-20.7289	-174.095	G1	Seuratcds	1205900	7327	7	4	7	C1_7	C1	7	NA	NA	NA	NA	NA	NA	NA	NA	NA	NA	NA	NA	NA	NA	NA	NA	4	4	lineage4	6.47786
C164	2	2066311	7493	E17.5	C164	0.0284367	421.981	11.8478	S	Seuratcds	1207495	7479	2	4	2_0	C1_2_0	C1	2_0	NA	NA	NA	NA	NA	NA	NA	NA	NA	NA	NA	NA	NA	NA	NA	NA	4	4	lineage4	6.47792
C193	2	2025955	7513	E17.5	C193	0.0307514	-108.818	-229.337	G1	Seuratcds	1207570	7507	2	4	2_0	C1_2_0	C1	2_0	NA	NA	NA	NA	NA	NA	NA	NA	NA	NA	NA	NA	NA	NA	NA	NA	4	4	lineage4	6.47797
C210	2	177023	3311	E17.5	C210	0.0572468	-17.6711	-25.612	G1	Seuratcds	1151905	4106	2	4	2_0	C1_2_0	C1	2_0	NA	NA	NA	NA	NA	NA	NA	NA	NA	NA	NA	NA	NA	NA	NA	NA	4	4	lineage4	5.36891
C233	2	1551932	5956	E17.5	C233	0.0324763	-105.363	-178.4	G1	Seuratcds	1206039	5946	2	4	2_0	C1_2_0	C1	2_0	NA	NA	NA	NA	NA	NA	NA	NA	NA	NA	NA	NA	NA	NA	NA	NA	4	4	lineage4	6.68014
C236	2	1696763	4605	E17.5	C236	0.0313786	63.8762	475.745	G2M	Seuratcds	1207229	4598	2	4	2_0	C1_2_0	C1	2_0	NA	NA	NA	NA	NA	NA	NA	NA	NA	NA	NA	NA	NA	NA	NA	NA	4	4	lineage4	6.47803
C238	2	227611	4527	E17.5	C238	0.0312507	-5.5716	-7.53373	G1	Seuratcds	1163765	4779	2	4	2_1	C1_2_1	C1	2_1	NA	NA	NA	NA	NA	NA	NA	NA	NA	NA	NA	NA	NA	NA	NA	NA	4	4	lineage4	5.4097
C241	2	1579552	4504	E17.5	C241	0.0307802	-68.1036	-146.759	G1	Seuratcds	1205564	4500	2	4	2_0	C1_2_0	C1	2_0	NA	NA	NA	NA	NA	NA	NA	NA	NA	NA	NA	NA	NA	NA	NA	NA	4	4	lineage4	6.47809
C251	2	189763	4399	E17.5	C251	0.0464263	5.47218	60.6261	G2M	Seuratcds	1177414	4809	2	4	2_0	C1_2_0	C1	2_0	NA	NA	NA	NA	NA	NA	NA	NA	NA	NA	NA	NA	NA	NA	NA	NA	4	4	lineage4	6.80246
C260	2	331945	4343	E17.5	C260	0.0257964	18.997	54.5928	G2M	Seuratcds	1186775	4390	2	4	2_0	C1_2_0	C1	2_0	NA	NA	NA	NA	NA	NA	NA	NA	NA	NA	NA	NA	NA	NA	NA	NA	4	4	lineage4	5.41016
C265	2	2100028	4192	E17.5	C265	0.0304101	-124.187	-206.189	G1	Seuratcds	1208135	4166	2	4	2_0	C1_2_0	C1	2_0	NA	NA	NA	NA	NA	NA	NA	NA	NA	NA	NA	NA	NA	NA	NA	NA	4	4	lineage4	6.47815
C276	7	2344464	3055	E17.5	C276	0.0232104	-208.95	-201.508	G1	Seuratcds	1208258	2801	7	4	7	C1_7	C1	7	NA	NA	NA	NA	NA	NA	NA	NA	NA	NA	NA	NA	NA	NA	NA	NA	4	4	lineage4	6.47821
C293	2	1870188	3480	E17.5	C293	0.0251969	-54.9071	453.938	G2M	Seuratcds	1207001	3468	2	4	2_0	C1_2_0	C1	2_0	NA	NA	NA	NA	NA	NA	NA	NA	NA	NA	NA	NA	NA	NA	NA	NA	4	4	lineage4	6.47826
C309	9	1395125	6476	E14.5	C309	0.0190771	265.845	-34.4712	S	Seuratcds	1205732	6456	9	0	9	C1_9	C1	9	NA	NA	NA	NA	NA	NA	NA	NA	NA	NA	NA	NA	NA	NA	NA	NA	0	0	lineage4	3.89457
C316	6	829621	4979	E14.5	C316	0.0242882	100.538	138.312	G2M	Seuratcds	1198641	4971	6	0	6	C1_6	C1	6	NA	NA	NA	NA	NA	NA	NA	NA	NA	NA	NA	NA	NA	NA	NA	NA	0	0	lineage4	3.26964
C321	9	1333395	4496	E14.5	C321	0.0223355	50.0014	307.11	G2M	Seuratcds	1205402	4488	9	0	9	C1_9	C1	9	NA	NA	NA	NA	NA	NA	NA	NA	NA	NA	NA	NA	NA	NA	NA	NA	0	0	lineage4	1.09617
C344	1	676628	4787	E14.5	C344	0.0228072	-34.8594	-60.1941	G1	Seuratcds	1197786	4776	1	0	1	C1_1	C1	1	NA	NA	NA	NA	NA	NA	NA	NA	NA	NA	NA	NA	NA	NA	NA	NA	0	0	lineage4	3.89463
C372	9	840703	3628	E14.5	C372	0.0182621	-54.0543	-60.0674	G1	Seuratcds	1198587	3623	9	0	9	C1_9	C1	9	NA	NA	NA	NA	NA	NA	NA	NA	NA	NA	NA	NA	NA	NA	NA	NA	0	0	lineage4	3.97827
C375	3	596841	3263	E14.5	C375	0.0364955	-31.0765	-55.9934	G1	Seuratcds	1196426	3262	3	0	3	C1_3	C1	3	NA	NA	NA	NA	NA	NA	NA	NA	NA	NA	NA	NA	NA	NA	NA	NA	0	0	lineage4	3.45519
C416	0	449988	4311	E14.5	C416	0.0298875	-42.1836	-54.6751	G1	Seuratcds	1189868	4312	0	0	0	C1_0	C1	0	NA	NA	NA	NA	NA	NA	NA	NA	NA	NA	NA	NA	NA	NA	NA	NA	0	0	lineage4	1.39781
C440	12	1118060	3610	E14.5	C440	0.0273536	-54.7672	-95.5472	G1	Seuratcds	1203650	3604	12	0	12	C1_12	C1	12	NA	NA	NA	NA	NA	NA	NA	NA	NA	NA	NA	NA	NA	NA	NA	NA	0	0	lineage4	3.97279
C444	5	1361302	5011	E14.5	C444	0.0306934	-68.5323	-150.661	G1	Seuratcds	1204277	4999	5	0	5	C1_5	C1	5	NA	NA	NA	NA	NA	NA	NA	NA	NA	NA	NA	NA	NA	NA	NA	NA	0	0	lineage4	1.10958
C453	0	1293287	3777	E14.5	C453	0.0199855	-84.0885	-109.477	G1	Seuratcds	1204921	3769	0	0	0	C1_0	C1	0	NA	NA	NA	NA	NA	NA	NA	NA	NA	NA	NA	NA	NA	NA	NA	NA	0	0	lineage4	2.61998
C486	5	1357367	4183	E14.5	C486	0.0256298	-73.741	-136.261	G1	Seuratcds	1204000	4174	5	0	5	C1_5	C1	5	NA	NA	NA	NA	NA	NA	NA	NA	NA	NA	NA	NA	NA	NA	NA	NA	0	0	lineage4	0.0382175
C489	3	746265	3277	E14.5	C489	0.0367497	-52.6226	-81.4509	G1	Seuratcds	1200908	3275	3	0	3	C1_3	C1	3	NA	NA	NA	NA	NA	NA	NA	NA	NA	NA	NA	NA	NA	NA	NA	NA	0	0	lineage4	1.65484
C496	0	1306722	3645	E14.5	C496	0.0272552	-50.9154	38.5317	G2M	Seuratcds	1203010	3640	0	0	0	C1_0	C1	0	NA	NA	NA	NA	NA	NA	NA	NA	NA	NA	NA	NA	NA	NA	NA	NA	0	0	lineage4	1.38029
C503	8	448907	2971	E11.5	C503	0.042472	-21.5625	-60.2785	G1	Seuratcds	1192766	3010	8	0	8	C1_8	C1	8	NA	NA	NA	NA	NA	NA	NA	NA	NA	NA	NA	NA	NA	NA	NA	NA	0	0	lineage4	3.89468
C507	5	2339948	4428	E11.5	C507	0.0307725	-201.965	-51.7202	G1	Seuratcds	1207955	4245	5	0	5	C1_5	C1	5	NA	NA	NA	NA	NA	NA	NA	NA	NA	NA	NA	NA	NA	NA	NA	NA	0	0	lineage4	1.07582
C510	3	539391	3176	E11.5	C510	0.0382227	-5.47585	-64.8935	G1	Seuratcds	1195550	3179	3	0	3	C1_3	C1	3	NA	NA	NA	NA	NA	NA	NA	NA	NA	NA	NA	NA	NA	NA	NA	NA	0	0	lineage4	3.66625
C511	3	936363	3386	E11.5	C511	0.0343691	-58.7129	-45.1045	G1	Seuratcds	1202515	3381	3	0	3	C1_3	C1	3	NA	NA	NA	NA	NA	NA	NA	NA	NA	NA	NA	NA	NA	NA	NA	NA	0	0	lineage4	0.230883
C512	8	1139137	3753	E11.5	C512	0.036417	78.9258	-94.6751	S	Seuratcds	1203311	3745	8	0	8	C1_8	C1	8	NA	NA	NA	NA	NA	NA	NA	NA	NA	NA	NA	NA	NA	NA	NA	NA	0	0	lineage4	1.4745
C516	3	249814	4565	E11.5	C516	0.0888541	-10.5758	-28.9828	G1	Seuratcds	1181998	4694	3	0	3	C1_3	C1	3	NA	NA	NA	NA	NA	NA	NA	NA	NA	NA	NA	NA	NA	NA	NA	NA	0	0	lineage4	4.34375
C519	1	2175144	5576	E11.5	C519	0.0316696	-17.4307	1157.01	G2M	Seuratcds	1209912	5536	1	0	1	C1_1	C1	1	NA	NA	NA	NA	NA	NA	NA	NA	NA	NA	NA	NA	NA	NA	NA	NA	0	0	lineage4	1.36602
C524	3	1108452	3978	E11.5	C524	0.055979	-80.283	-77.6857	G1	Seuratcds	1203330	3970	3	0	3	C1_3	C1	3	NA	NA	NA	NA	NA	NA	NA	NA	NA	NA	NA	NA	NA	NA	NA	NA	0	0	lineage4	0
C531	5	1710198	5292	E11.5	C531	0.0297182	240.689	80.1221	S	Seuratcds	1205812	5284	5	0	5	C1_5	C1	5	NA	NA	NA	NA	NA	NA	NA	NA	NA	NA	NA	NA	NA	NA	NA	NA	0	0	lineage4	1.60882
C534	3	206602	3457	E11.5	C534	0.0807301	19.7642	-8.40178	S	Seuratcds	1176553	4018	3	0	3	C1_3	C1	3	NA	NA	NA	NA	NA	NA	NA	NA	NA	NA	NA	NA	NA	NA	NA	NA	0	0	lineage4	0.158317
C540	3	1213136	3463	E11.5	C540	0.0525209	-73.1949	-131.335	G1	Seuratcds	1204325	3456	3	0	3	C1_3	C1	3	NA	NA	NA	NA	NA	NA	NA	NA	NA	NA	NA	NA	NA	NA	NA	NA	0	0	lineage4	0.872057
C556	3	477763	3537	E11.5	C556	0.0684817	77.5405	-11.4778	S	Seuratcds	1188109	3538	3	0	3	C1_3	C1	3	NA	NA	NA	NA	NA	NA	NA	NA	NA	NA	NA	NA	NA	NA	NA	NA	0	0	lineage4	1.39107
C557	3	284954	2899	E11.5	C557	0.0823887	94.7223	-17.6742	S	Seuratcds	1179498	3170	3	0	3	C1_3	C1	3	NA	NA	NA	NA	NA	NA	NA	NA	NA	NA	NA	NA	NA	NA	NA	NA	0	0	lineage4	1.6549
C558	3	1898728	3976	E11.5	C558	0.0298942	-107.019	-199.271	G1	Seuratcds	1207433	3966	3	0	3	C1_3	C1	3	NA	NA	NA	NA	NA	NA	NA	NA	NA	NA	NA	NA	NA	NA	NA	NA	0	0	lineage4	0.0104633
C564	5	1697071	4689	E11.5	C564	0.0303517	-145.337	-170.896	G1	Seuratcds	1206300	4670	5	0	5	C1_5	C1	5	NA	NA	NA	NA	NA	NA	NA	NA	NA	NA	NA	NA	NA	NA	NA	NA	0	0	lineage4	1.65496
C568	3	703828	3498	E11.5	C568	0.0297686	-39.1404	-78.0111	G1	Seuratcds	1198561	3488	3	0	3	C1_3	C1	3	NA	NA	NA	NA	NA	NA	NA	NA	NA	NA	NA	NA	NA	NA	NA	NA	0	0	lineage4	3.89474
C575	3	411561	4404	E11.5	C575	0.0519364	-32.4962	-41.088	G1	Seuratcds	1189978	4398	3	0	3	C1_3	C1	3	NA	NA	NA	NA	NA	NA	NA	NA	NA	NA	NA	NA	NA	NA	NA	NA	0	0	lineage4	0.0666116
C577	3	453366	3027	E11.5	C577	0.0472047	-33.1661	-53.6624	G1	Seuratcds	1194196	3055	3	0	3	C1_3	C1	3	NA	NA	NA	NA	NA	NA	NA	NA	NA	NA	NA	NA	NA	NA	NA	NA	0	0	lineage4	1.65501
C580	5	1909353	4722	E11.5	C580	0.0338649	-140.678	-217.221	G1	Seuratcds	1209489	4706	5	0	5	C1_5	C1	5	NA	NA	NA	NA	NA	NA	NA	NA	NA	NA	NA	NA	NA	NA	NA	NA	0	0	lineage4	0.0381599
C601	0	1903656	3601	E12.5	C601	0.018673	-174.808	-185.741	G1	Seuratcds	1209195	3588	0	0	0	C1_0	C1	0	NA	NA	NA	NA	NA	NA	NA	NA	NA	NA	NA	NA	NA	NA	NA	NA	0	0	lineage4	2.44665
C603	3	1625081	3548	E12.5	C603	0.032999	-75.092	-160.555	G1	Seuratcds	1205809	3504	3	0	3	C1_3	C1	3	NA	NA	NA	NA	NA	NA	NA	NA	NA	NA	NA	NA	NA	NA	NA	NA	0	0	lineage4	0.0381023
C605	0	2239123	3910	E12.5	C605	0.0300689	320.159	-164.517	S	Seuratcds	1209386	3847	0	0	0	C1_0	C1	0	NA	NA	NA	NA	NA	NA	NA	NA	NA	NA	NA	NA	NA	NA	NA	NA	0	0	lineage4	0.056288
C611	8	1499018	2823	E12.5	C611	0.0327541	-152.277	-143.901	G1	Seuratcds	1209879	2816	8	0	8	C1_8	C1	8	NA	NA	NA	NA	NA	NA	NA	NA	NA	NA	NA	NA	NA	NA	NA	NA	0	0	lineage4	3.03528
C617	8	513192	2668	E12.5	C617	0.0343146	-15.789	-30.6296	G1	Seuratcds	1194761	2680	8	0	8	C1_8	C1	8	NA	NA	NA	NA	NA	NA	NA	NA	NA	NA	NA	NA	NA	NA	NA	NA	0	0	lineage4	2.72367
C618	8	870430	2801	E12.5	C618	0.036752	-42.807	-90.7008	G1	Seuratcds	1200894	2788	8	0	8	C1_8	C1	8	NA	NA	NA	NA	NA	NA	NA	NA	NA	NA	NA	NA	NA	NA	NA	NA	0	0	lineage4	2.99714
C619	5	1430454	3881	E12.5	C619	0.0246397	41.4176	-109.62	S	Seuratcds	1205242	3873	5	0	5	C1_5	C1	5	NA	NA	NA	NA	NA	NA	NA	NA	NA	NA	NA	NA	NA	NA	NA	NA	0	0	lineage4	0.0380446
C625	0	1974025	3696	E12.5	C625	0.0168767	-53.91	-214.097	G1	Seuratcds	1210650	3688	0	0	0	C1_0	C1	0	NA	NA	NA	NA	NA	NA	NA	NA	NA	NA	NA	NA	NA	NA	NA	NA	0	0	lineage4	2.05418
C627	0	2045707	5067	E12.5	C627	0.0222969	-99.502	293.662	G2M	Seuratcds	1214251	5051	0	0	0	C1_0	C1	0	NA	NA	NA	NA	NA	NA	NA	NA	NA	NA	NA	NA	NA	NA	NA	NA	0	0	lineage4	0.037987
C630	3	967249	2923	E12.5	C630	0.0304182	-36.929	-16.805	G1	Seuratcds	1201847	2888	3	0	3	C1_3	C1	3	NA	NA	NA	NA	NA	NA	NA	NA	NA	NA	NA	NA	NA	NA	NA	NA	0	0	lineage4	0.0179889
C635	0	933451	2777	E12.5	C635	0.0251508	-8.95144	-58.6493	G1	Seuratcds	1196375	2772	0	0	0	C1_0	C1	0	NA	NA	NA	NA	NA	NA	NA	NA	NA	NA	NA	NA	NA	NA	NA	NA	0	0	lineage4	3.94282
C636	8	1142893	4205	E12.5	C636	0.0391296	-58.4181	-80.3256	G1	Seuratcds	1203210	4174	8	0	8	C1_8	C1	8	NA	NA	NA	NA	NA	NA	NA	NA	NA	NA	NA	NA	NA	NA	NA	NA	0	0	lineage4	2.90499
C647	0	3000016	3128	E12.5	C647	0.0212929	-113.337	-159.913	G1	Seuratcds	1214455	2947	0	0	0	C1_0	C1	0	NA	NA	NA	NA	NA	NA	NA	NA	NA	NA	NA	NA	NA	NA	NA	NA	0	0	lineage4	1.89698
C650	0	620689	2451	E12.5	C650	0.0304919	-59.9297	-80.4422	G1	Seuratcds	1194331	2449	0	0	0	C1_0	C1	0	NA	NA	NA	NA	NA	NA	NA	NA	NA	NA	NA	NA	NA	NA	NA	NA	0	0	lineage4	2.64598
C654	0	2146257	3596	E12.5	C654	0.0226986	71.1331	-211.908	S	Seuratcds	1215663	3559	0	0	0	C1_0	C1	0	NA	NA	NA	NA	NA	NA	NA	NA	NA	NA	NA	NA	NA	NA	NA	NA	0	0	lineage4	2.3956
C655	8	427932	2092	E12.5	C655	0.0407752	-47.1752	-48.8212	G1	Seuratcds	1184367	2218	8	0	8	C1_8	C1	8	NA	NA	NA	NA	NA	NA	NA	NA	NA	NA	NA	NA	NA	NA	NA	NA	0	0	lineage4	3.8948
C659	0	1771916	2810	E12.5	C659	0.023259	-199.006	-151.059	G1	Seuratcds	1213885	2795	0	0	0	C1_0	C1	0	NA	NA	NA	NA	NA	NA	NA	NA	NA	NA	NA	NA	NA	NA	NA	NA	0	0	lineage4	2.50928
C660	0	2170248	2844	E12.5	C660	0.0200249	-178.862	-271.141	G1	Seuratcds	1214512	2797	0	0	0	C1_0	C1	0	NA	NA	NA	NA	NA	NA	NA	NA	NA	NA	NA	NA	NA	NA	NA	NA	0	0	lineage4	2.61748
C664	1	2285800	4029	E12.5	C664	0.0176162	26.9326	963.277	G2M	Seuratcds	1216916	3973	1	0	1	C1_1	C1	1	NA	NA	NA	NA	NA	NA	NA	NA	NA	NA	NA	NA	NA	NA	NA	NA	0	0	lineage4	4.04076
C670	0	2134607	2921	E12.5	C670	0.0269464	-240.692	-156.707	G1	Seuratcds	1213764	2888	0	0	0	C1_0	C1	0	NA	NA	NA	NA	NA	NA	NA	NA	NA	NA	NA	NA	NA	NA	NA	NA	0	0	lineage4	3.16663
C672	0	1688914	3366	E12.5	C672	0.017008	-158.302	-146.813	G1	Seuratcds	1214066	3358	0	0	0	C1_0	C1	0	NA	NA	NA	NA	NA	NA	NA	NA	NA	NA	NA	NA	NA	NA	NA	NA	0	0	lineage4	3.56784
C673	3	745702	2416	E12.5	C673	0.0328617	65.5304	-57.2305	S	Seuratcds	1200454	2412	3	0	3	C1_3	C1	3	NA	NA	NA	NA	NA	NA	NA	NA	NA	NA	NA	NA	NA	NA	NA	NA	0	0	lineage4	0.0923625
C709	5	944915	4791	E12.5	C709	0.0375039	-41.4935	343.152	G2M	Seuratcds	1201380	4781	5	0	5	C1_5	C1	5	NA	NA	NA	NA	NA	NA	NA	NA	NA	NA	NA	NA	NA	NA	NA	NA	0	0	lineage4	0.0379294
C724	8	1261575	3437	E12.5	C724	0.031123	-79.9837	-99.9063	G1	Seuratcds	1204055	3429	8	0	8	C1_8	C1	8	NA	NA	NA	NA	NA	NA	NA	NA	NA	NA	NA	NA	NA	NA	NA	NA	0	0	lineage4	3.34032
C737	8	990904	3302	E12.5	C737	0.0322998	-54.8683	-110.988	G1	Seuratcds	1202288	3296	8	0	8	C1_8	C1	8	NA	NA	NA	NA	NA	NA	NA	NA	NA	NA	NA	NA	NA	NA	NA	NA	0	0	lineage4	1.95912
C753	6	1098627	4431	E12.5	C753	0.0348617	-31.4636	-127.664	G1	Seuratcds	1203318	4425	6	0	6	C1_6	C1	6	NA	NA	NA	NA	NA	NA	NA	NA	NA	NA	NA	NA	NA	NA	NA	NA	0	0	lineage4	4.04082
C757	12	1384264	4117	E12.5	C757	0.0399006	-76.6544	-125.446	G1	Seuratcds	1206086	4104	12	0	12	C1_12	C1	12	NA	NA	NA	NA	NA	NA	NA	NA	NA	NA	NA	NA	NA	NA	NA	NA	0	0	lineage4	0.110869
C763	3	1064180	3535	E12.5	C763	0.040464	-44.7316	-98.6288	G1	Seuratcds	1202278	3525	3	0	3	C1_3	C1	3	NA	NA	NA	NA	NA	NA	NA	NA	NA	NA	NA	NA	NA	NA	NA	NA	0	0	lineage4	3.99965
C772	0	1993318	6241	E12.5	C772	0.0273975	67.0006	590.988	G2M	Seuratcds	1208369	6226	0	0	0	C1_0	C1	0	NA	NA	NA	NA	NA	NA	NA	NA	NA	NA	NA	NA	NA	NA	NA	NA	0	0	lineage4	0.0378717
C784	3	762152	3054	E12.5	C784	0.0590302	-42.7957	-73.5416	G1	Seuratcds	1197317	3043	3	0	3	C1_3	C1	3	NA	NA	NA	NA	NA	NA	NA	NA	NA	NA	NA	NA	NA	NA	NA	NA	0	0	lineage4	0.0446189
C792	3	289545	2494	E12.5	C792	0.0451122	-20.8734	-36.0504	G1	Seuratcds	1188053	2792	3	0	3	C1_3	C1	3	NA	NA	NA	NA	NA	NA	NA	NA	NA	NA	NA	NA	NA	NA	NA	NA	0	0	lineage4	4.0106
C794	8	812197	3093	E12.5	C794	0.0406822	-50.0563	-98.8762	G1	Seuratcds	1199696	3090	8	0	8	C1_8	C1	8	NA	NA	NA	NA	NA	NA	NA	NA	NA	NA	NA	NA	NA	NA	NA	NA	0	0	lineage4	1.65507
C101	4	1151575	8736	E17.5	C101	0.034267	-69.9331	-107.177	G1	Seuratcds	1203654	8731	4	3	4_1	C1_4_1	C1	4_1	NA	NA	NA	NA	NA	NA	NA	NA	NA	NA	NA	NA	NA	NA	NA	NA	3	3	lineage3	7.82685
C103	7	2609182	8299	E17.5	C103	0.0174875	-93.346	1303	G2M	Seuratcds	1207658	7183	7	3	7	C1_7	C1	7	NA	NA	NA	NA	NA	NA	NA	NA	NA	NA	NA	NA	NA	NA	NA	NA	3	3	lineage3	6.12505
C124	7	1685188	7809	E17.5	C124	0.034408	-139.478	-154.455	G1	Seuratcds	1204256	7800	7	3	7	C1_7	C1	7	NA	NA	NA	NA	NA	NA	NA	NA	NA	NA	NA	NA	NA	NA	NA	NA	3	3	lineage3	6.49654
C125	7	2285243	7718	E17.5	C125	0.0254489	-78.7404	749.464	G2M	Seuratcds	1209399	7638	7	3	7	C1_7	C1	7	NA	NA	NA	NA	NA	NA	NA	NA	NA	NA	NA	NA	NA	NA	NA	NA	3	3	lineage3	5.67732
C128	7	2140413	7905	E17.5	C128	0.0317289	375.46	77.9591	S	Seuratcds	1207470	7874	7	3	7	C1_7	C1	7	NA	NA	NA	NA	NA	NA	NA	NA	NA	NA	NA	NA	NA	NA	NA	NA	3	3	lineage3	6.1899
C129	7	1932485	7794	E17.5	C129	0.0197031	-154.68	-245.254	G1	Seuratcds	1209499	7779	7	3	7	C1_7	C1	7	NA	NA	NA	NA	NA	NA	NA	NA	NA	NA	NA	NA	NA	NA	NA	NA	3	3	lineage3	6.38864
C131	7	2327160	7844	E17.5	C131	0.0240473	-143.052	-262.623	G1	Seuratcds	1210090	7494	7	3	7	C1_7	C1	7	NA	NA	NA	NA	NA	NA	NA	NA	NA	NA	NA	NA	NA	NA	NA	NA	3	3	lineage3	6.80136
C134	7	1681730	7538	E17.5	C134	0.035586	-12.6831	-174.027	G1	Seuratcds	1205739	7524	7	3	7	C1_7	C1	7	NA	NA	NA	NA	NA	NA	NA	NA	NA	NA	NA	NA	NA	NA	NA	NA	3	3	lineage3	6.71086
C142	7	1484602	7691	E17.5	C142	0.0389734	-99.3625	-186.378	G1	Seuratcds	1206004	7682	7	3	7	C1_7	C1	7	NA	NA	NA	NA	NA	NA	NA	NA	NA	NA	NA	NA	NA	NA	NA	NA	3	3	lineage3	6.92399
C144	2	793334	7651	E17.5	C144	0.0292966	-38.6804	-85.9335	G1	Seuratcds	1203203	7647	2	3	2_0	C1_2_0	C1	2_0	NA	NA	NA	NA	NA	NA	NA	NA	NA	NA	NA	NA	NA	NA	NA	NA	3	3	lineage3	5.67668
C146	4	276107	8805	E17.5	C146	0.0260008	-7.91133	-10.3119	G1	Seuratcds	1191690	8802	4	3	4_0	C1_4_0	C1	4_0	NA	NA	NA	NA	NA	NA	NA	NA	NA	NA	NA	NA	NA	NA	NA	NA	3	3	lineage3	8.0095
C147	4	170463	8158	E17.5	C147	0.024586	-4.29971	-7.58132	G1	Seuratcds	1190704	8177	4	3	4_0	C1_4_0	C1	4_0	NA	NA	NA	NA	NA	NA	NA	NA	NA	NA	NA	NA	NA	NA	NA	NA	3	3	lineage3	8.01249
C148	4	258011	8496	E17.5	C148	0.0380255	-7.61299	-14.3362	G1	Seuratcds	1193420	8492	4	3	4_0	C1_4_0	C1	4_0	NA	NA	NA	NA	NA	NA	NA	NA	NA	NA	NA	NA	NA	NA	NA	NA	3	3	lineage3	6.61836
C150	4	1420080	8238	E17.5	C150	0.0242585	-81.9636	-143.446	G1	Seuratcds	1205107	8226	4	3	4_1	C1_4_1	C1	4_1	NA	NA	NA	NA	NA	NA	NA	NA	NA	NA	NA	NA	NA	NA	NA	NA	3	3	lineage3	7.82691
C155	4	1785104	8064	E17.5	C155	0.0306145	-139.796	-36.0435	G1	Seuratcds	1204563	8046	4	3	4_1	C1_4_1	C1	4_1	NA	NA	NA	NA	NA	NA	NA	NA	NA	NA	NA	NA	NA	NA	NA	NA	3	3	lineage3	7.83172
C158	4	1855782	7498	E17.5	C158	0.026619	-116.499	476.742	G2M	Seuratcds	1206555	7490	4	3	4_1	C1_4_1	C1	4_1	NA	NA	NA	NA	NA	NA	NA	NA	NA	NA	NA	NA	NA	NA	NA	NA	3	3	lineage3	7.82697
C165	4	1593926	8254	E17.5	C165	0.03409	-113.314	-176.424	G1	Seuratcds	1206135	8243	4	3	4_1	C1_4_1	C1	4_1	NA	NA	NA	NA	NA	NA	NA	NA	NA	NA	NA	NA	NA	NA	NA	NA	3	3	lineage3	6.60489
C166	7	1823957	7258	E17.5	C166	0.0251256	116.452	-157.336	S	Seuratcds	1206754	7245	7	3	7	C1_7	C1	7	NA	NA	NA	NA	NA	NA	NA	NA	NA	NA	NA	NA	NA	NA	NA	NA	3	3	lineage3	6.23523
C167	4	1328868	7529	E17.5	C167	0.0279494	-101.959	-182.201	G1	Seuratcds	1205220	7522	4	3	4_1	C1_4_1	C1	4_1	NA	NA	NA	NA	NA	NA	NA	NA	NA	NA	NA	NA	NA	NA	NA	NA	3	3	lineage3	6.61791
C174	4	1911804	8237	E17.5	C174	0.0204477	64.904	638.678	G2M	Seuratcds	1208658	8222	4	3	4_0	C1_4_0	C1	4_0	NA	NA	NA	NA	NA	NA	NA	NA	NA	NA	NA	NA	NA	NA	NA	NA	3	3	lineage3	7.82703
C184	7	2130053	7652	E17.5	C184	0.029726	-129.853	-240.437	G1	Seuratcds	1208493	7624	7	3	7	C1_7	C1	7	NA	NA	NA	NA	NA	NA	NA	NA	NA	NA	NA	NA	NA	NA	NA	NA	3	3	lineage3	6.71389
C185	7	1852662	7119	E17.5	C185	0.0283214	-74.5953	-180.365	G1	Seuratcds	1206592	7114	7	3	7	C1_7	C1	7	NA	NA	NA	NA	NA	NA	NA	NA	NA	NA	NA	NA	NA	NA	NA	NA	3	3	lineage3	5.66186
C186	4	1346042	7718	E17.5	C186	0.0310183	-92.356	-100.627	G1	Seuratcds	1204849	7708	4	3	4_0	C1_4_0	C1	4_0	NA	NA	NA	NA	NA	NA	NA	NA	NA	NA	NA	NA	NA	NA	NA	NA	3	3	lineage3	7.8783
C194	4	1343097	6674	E17.5	C194	0.0237377	-74.4045	-167.752	G1	Seuratcds	1205420	6665	4	3	4_0	C1_4_0	C1	4_0	NA	NA	NA	NA	NA	NA	NA	NA	NA	NA	NA	NA	NA	NA	NA	NA	3	3	lineage3	6.61078
C195	7	814559	5962	E17.5	C195	0.0273915	-43.3341	-98.7461	G1	Seuratcds	1200832	5955	7	3	7	C1_7	C1	7	NA	NA	NA	NA	NA	NA	NA	NA	NA	NA	NA	NA	NA	NA	NA	NA	3	3	lineage3	6.92151
C196	4	232177	8011	E17.5	C196	0.037859	-9.75439	-18.5238	G1	Seuratcds	1187040	8010	4	3	4_1	C1_4_1	C1	4_1	NA	NA	NA	NA	NA	NA	NA	NA	NA	NA	NA	NA	NA	NA	NA	NA	3	3	lineage3	6.60786
C204	7	1832462	4576	E17.5	C204	0.0327838	-63.3156	-205.633	G1	Seuratcds	1206096	4567	7	3	7	C1_7	C1	7	NA	NA	NA	NA	NA	NA	NA	NA	NA	NA	NA	NA	NA	NA	NA	NA	3	3	lineage3	6.26269
C205	7	1352700	5977	E17.5	C205	0.0353781	-74.587	-108.903	G1	Seuratcds	1204694	5954	7	3	7	C1_7	C1	7	NA	NA	NA	NA	NA	NA	NA	NA	NA	NA	NA	NA	NA	NA	NA	NA	3	3	lineage3	6.6386
C221	4	1589703	4674	E17.5	C221	0.0292344	-104.07	-183.004	G1	Seuratcds	1207302	4667	4	3	4_1	C1_4_1	C1	4_1	NA	NA	NA	NA	NA	NA	NA	NA	NA	NA	NA	NA	NA	NA	NA	NA	3	3	lineage3	6.62363
C231	4	377103	4832	E17.5	C231	0.0310154	32.7168	9.84741	S	Seuratcds	1190766	4847	4	3	4_1	C1_4_1	C1	4_1	NA	NA	NA	NA	NA	NA	NA	NA	NA	NA	NA	NA	NA	NA	NA	NA	3	3	lineage3	7.82708
C232	1	221030	3931	E17.5	C232	0.0415645	-10.7745	-24.2915	G1	Seuratcds	1163432	4302	1	3	1	C1_1	C1	1	NA	NA	NA	NA	NA	NA	NA	NA	NA	NA	NA	NA	NA	NA	NA	NA	3	3	lineage3	4.75966
C270	2	2029856	4864	E17.5	C270	0.0322437	-147.834	-239.798	G1	Seuratcds	1208558	4849	2	3	2_0	C1_2_0	C1	2_0	NA	NA	NA	NA	NA	NA	NA	NA	NA	NA	NA	NA	NA	NA	NA	NA	3	3	lineage3	5.71937
C310	3	752766	2986	E14.5	C310	0.0349192	-1.11802	56.7693	G2M	Seuratcds	1199848	2983	3	0	3	C1_3	C1	3	NA	NA	NA	NA	NA	NA	NA	NA	NA	NA	NA	NA	NA	NA	NA	NA	0	0	lineage3	4.17382
C321	9	1333395	4496	E14.5	C321	0.0223355	50.0014	307.11	G2M	Seuratcds	1205402	4488	9	0	9	C1_9	C1	9	NA	NA	NA	NA	NA	NA	NA	NA	NA	NA	NA	NA	NA	NA	NA	NA	0	0	lineage3	1.09617
C339	0	1039833	5118	E14.5	C339	0.0230172	138.081	87.0772	S	Seuratcds	1201851	5103	0	3	0	C1_0	C1	0	NA	NA	NA	NA	NA	NA	NA	NA	NA	NA	NA	NA	NA	NA	NA	NA	3	3	lineage3	4.93224
C350	9	893297	4699	E14.5	C350	0.0273257	-30.5073	430.783	G2M	Seuratcds	1200100	4684	9	0	9	C1_9	C1	9	NA	NA	NA	NA	NA	NA	NA	NA	NA	NA	NA	NA	NA	NA	NA	NA	0	0	lineage3	4.16484
C354	9	667224	3525	E14.5	C354	0.0204504	-38.6358	-69.5466	G1	Seuratcds	1198518	3513	9	0	9	C1_9	C1	9	NA	NA	NA	NA	NA	NA	NA	NA	NA	NA	NA	NA	NA	NA	NA	NA	0	0	lineage3	1.91404
C361	1	474712	2908	E14.5	C361	0.0478543	-22.617	-54.4835	G1	Seuratcds	1194061	2927	1	0	1	C1_1	C1	1	NA	NA	NA	NA	NA	NA	NA	NA	NA	NA	NA	NA	NA	NA	NA	NA	0	0	lineage3	4.75971
C380	7	691806	4632	E14.5	C380	0.0276725	-9.92567	-77.6747	G1	Seuratcds	1201240	4612	7	3	7	C1_7	C1	7	NA	NA	NA	NA	NA	NA	NA	NA	NA	NA	NA	NA	NA	NA	NA	NA	3	3	lineage3	6.15794
C382	1	947427	2771	E14.5	C382	0.0143135	-103.799	-92.7328	G1	Seuratcds	1197982	2764	1	3	1	C1_1	C1	1	NA	NA	NA	NA	NA	NA	NA	NA	NA	NA	NA	NA	NA	NA	NA	NA	3	3	lineage3	4.75977
C386	9	768932	3686	E14.5	C386	0.0297074	43.8962	-88.1688	S	Seuratcds	1201061	3682	9	0	9	C1_9	C1	9	NA	NA	NA	NA	NA	NA	NA	NA	NA	NA	NA	NA	NA	NA	NA	NA	0	0	lineage3	4.17388
C405	0	1003888	5434	E14.5	C405	0.0246133	50.5855	122.114	G2M	Seuratcds	1202560	5425	0	0	0	C1_0	C1	0	NA	NA	NA	NA	NA	NA	NA	NA	NA	NA	NA	NA	NA	NA	NA	NA	0	0	lineage3	4.24313
C416	0	449988	4311	E14.5	C416	0.0298875	-42.1836	-54.6751	G1	Seuratcds	1189868	4312	0	0	0	C1_0	C1	0	NA	NA	NA	NA	NA	NA	NA	NA	NA	NA	NA	NA	NA	NA	NA	NA	0	0	lineage3	1.39781
C419	0	1334673	5988	E14.5	C419	0.0272134	35.9653	507.06	G2M	Seuratcds	1204802	5977	0	0	0	C1_0	C1	0	NA	NA	NA	NA	NA	NA	NA	NA	NA	NA	NA	NA	NA	NA	NA	NA	0	0	lineage3	5.26501
C424	12	775494	4158	E14.5	C424	0.0330499	77.3059	51.167	S	Seuratcds	1201594	4150	12	0	12	C1_12	C1	12	NA	NA	NA	NA	NA	NA	NA	NA	NA	NA	NA	NA	NA	NA	NA	NA	0	0	lineage3	5.10158
C437	0	1199421	6011	E14.5	C437	0.0278193	185.466	37.8512	S	Seuratcds	1203656	5993	0	0	0	C1_0	C1	0	NA	NA	NA	NA	NA	NA	NA	NA	NA	NA	NA	NA	NA	NA	NA	NA	0	0	lineage3	3.4572
C441	0	619223	4550	E14.5	C441	0.029172	142.251	33.6926	S	Seuratcds	1199374	4543	0	0	0	C1_0	C1	0	NA	NA	NA	NA	NA	NA	NA	NA	NA	NA	NA	NA	NA	NA	NA	NA	0	0	lineage3	3.8065
C444	5	1361302	5011	E14.5	C444	0.0306934	-68.5323	-150.661	G1	Seuratcds	1204277	4999	5	0	5	C1_5	C1	5	NA	NA	NA	NA	NA	NA	NA	NA	NA	NA	NA	NA	NA	NA	NA	NA	0	0	lineage3	1.10958
C446	0	1069292	2455	E14.5	C446	0.0216414	-33.6893	-62.2636	G1	Seuratcds	1203513	2447	0	0	0	C1_0	C1	0	NA	NA	NA	NA	NA	NA	NA	NA	NA	NA	NA	NA	NA	NA	NA	NA	0	0	lineage3	3.66731
C447	0	764679	6201	E14.5	C447	0.0276717	-7.59234	30.0341	G2M	Seuratcds	1200822	6188	0	0	0	C1_0	C1	0	NA	NA	NA	NA	NA	NA	NA	NA	NA	NA	NA	NA	NA	NA	NA	NA	0	0	lineage3	4.0505
C451	12	778300	3822	E14.5	C451	0.0384106	-26.3316	13.3098	G2M	Seuratcds	1201963	3812	12	0	12	C1_12	C1	12	NA	NA	NA	NA	NA	NA	NA	NA	NA	NA	NA	NA	NA	NA	NA	NA	0	0	lineage3	3.98597
C456	0	645315	4742	E14.5	C456	0.0318046	0.192268	-59.363	S	Seuratcds	1199987	4730	0	0	0	C1_0	C1	0	NA	NA	NA	NA	NA	NA	NA	NA	NA	NA	NA	NA	NA	NA	NA	NA	0	0	lineage3	4.22803
C459	8	245215	3214	E14.5	C459	0.0358583	-7.17964	-25.14	G1	Seuratcds	1191056	3547	8	0	8	C1_8	C1	8	NA	NA	NA	NA	NA	NA	NA	NA	NA	NA	NA	NA	NA	NA	NA	NA	0	0	lineage3	3.47742
C464	0	1237964	4857	E14.5	C464	0.0267827	-17.1959	325.582	G2M	Seuratcds	1203915	4850	0	3	0	C1_0	C1	0	NA	NA	NA	NA	NA	NA	NA	NA	NA	NA	NA	NA	NA	NA	NA	NA	3	3	lineage3	5.10495
C465	0	672239	4409	E14.5	C465	0.0400081	38.8169	117.543	G2M	Seuratcds	1200729	4400	0	0	0	C1_0	C1	0	NA	NA	NA	NA	NA	NA	NA	NA	NA	NA	NA	NA	NA	NA	NA	NA	0	0	lineage3	5.16766
C466	0	1881731	4790	E14.5	C466	0.0241846	-112.021	-190.403	G1	Seuratcds	1206049	4778	0	0	0	C1_0	C1	0	NA	NA	NA	NA	NA	NA	NA	NA	NA	NA	NA	NA	NA	NA	NA	NA	0	0	lineage3	4.17393
C468	0	1203387	5224	E14.5	C468	0.0309427	-51.1614	291.391	G2M	Seuratcds	1203301	5211	0	0	0	C1_0	C1	0	NA	NA	NA	NA	NA	NA	NA	NA	NA	NA	NA	NA	NA	NA	NA	NA	0	0	lineage3	3.54107
C486	5	1357367	4183	E14.5	C486	0.0256298	-73.741	-136.261	G1	Seuratcds	1204000	4174	5	0	5	C1_5	C1	5	NA	NA	NA	NA	NA	NA	NA	NA	NA	NA	NA	NA	NA	NA	NA	NA	0	0	lineage3	0.0382175
C489	3	746265	3277	E14.5	C489	0.0367497	-52.6226	-81.4509	G1	Seuratcds	1200908	3275	3	0	3	C1_3	C1	3	NA	NA	NA	NA	NA	NA	NA	NA	NA	NA	NA	NA	NA	NA	NA	NA	0	0	lineage3	1.65484
C496	0	1306722	3645	E14.5	C496	0.0272552	-50.9154	38.5317	G2M	Seuratcds	1203010	3640	0	0	0	C1_0	C1	0	NA	NA	NA	NA	NA	NA	NA	NA	NA	NA	NA	NA	NA	NA	NA	NA	0	0	lineage3	1.38029
C507	5	2339948	4428	E11.5	C507	0.0307725	-201.965	-51.7202	G1	Seuratcds	1207955	4245	5	0	5	C1_5	C1	5	NA	NA	NA	NA	NA	NA	NA	NA	NA	NA	NA	NA	NA	NA	NA	NA	0	0	lineage3	1.07582
C511	3	936363	3386	E11.5	C511	0.0343691	-58.7129	-45.1045	G1	Seuratcds	1202515	3381	3	0	3	C1_3	C1	3	NA	NA	NA	NA	NA	NA	NA	NA	NA	NA	NA	NA	NA	NA	NA	NA	0	0	lineage3	0.230883
C512	8	1139137	3753	E11.5	C512	0.036417	78.9258	-94.6751	S	Seuratcds	1203311	3745	8	0	8	C1_8	C1	8	NA	NA	NA	NA	NA	NA	NA	NA	NA	NA	NA	NA	NA	NA	NA	NA	0	0	lineage3	1.4745
C515	1	1935488	4642	E11.5	C515	0.0311193	-93.3842	861.501	G2M	Seuratcds	1208247	4630	1	0	1	C1_1	C1	1	NA	NA	NA	NA	NA	NA	NA	NA	NA	NA	NA	NA	NA	NA	NA	NA	0	0	lineage3	2.88427
C519	1	2175144	5576	E11.5	C519	0.0316696	-17.4307	1157.01	G2M	Seuratcds	1209912	5536	1	0	1	C1_1	C1	1	NA	NA	NA	NA	NA	NA	NA	NA	NA	NA	NA	NA	NA	NA	NA	NA	0	0	lineage3	1.36602
C524	3	1108452	3978	E11.5	C524	0.055979	-80.283	-77.6857	G1	Seuratcds	1203330	3970	3	0	3	C1_3	C1	3	NA	NA	NA	NA	NA	NA	NA	NA	NA	NA	NA	NA	NA	NA	NA	NA	0	0	lineage3	0
C531	5	1710198	5292	E11.5	C531	0.0297182	240.689	80.1221	S	Seuratcds	1205812	5284	5	0	5	C1_5	C1	5	NA	NA	NA	NA	NA	NA	NA	NA	NA	NA	NA	NA	NA	NA	NA	NA	0	0	lineage3	1.60882
C534	3	206602	3457	E11.5	C534	0.0807301	19.7642	-8.40178	S	Seuratcds	1176553	4018	3	0	3	C1_3	C1	3	NA	NA	NA	NA	NA	NA	NA	NA	NA	NA	NA	NA	NA	NA	NA	NA	0	0	lineage3	0.158317
C540	3	1213136	3463	E11.5	C540	0.0525209	-73.1949	-131.335	G1	Seuratcds	1204325	3456	3	0	3	C1_3	C1	3	NA	NA	NA	NA	NA	NA	NA	NA	NA	NA	NA	NA	NA	NA	NA	NA	0	0	lineage3	0.872057
C552	5	1989606	4002	E11.5	C552	0.026644	-157.436	-239.264	G1	Seuratcds	1209848	3990	5	0	5	C1_5	C1	5	NA	NA	NA	NA	NA	NA	NA	NA	NA	NA	NA	NA	NA	NA	NA	NA	0	0	lineage3	1.71641
C556	3	477763	3537	E11.5	C556	0.0684817	77.5405	-11.4778	S	Seuratcds	1188109	3538	3	0	3	C1_3	C1	3	NA	NA	NA	NA	NA	NA	NA	NA	NA	NA	NA	NA	NA	NA	NA	NA	0	0	lineage3	1.39107
C557	3	284954	2899	E11.5	C557	0.0823887	94.7223	-17.6742	S	Seuratcds	1179498	3170	3	0	3	C1_3	C1	3	NA	NA	NA	NA	NA	NA	NA	NA	NA	NA	NA	NA	NA	NA	NA	NA	0	0	lineage3	1.6549
C558	3	1898728	3976	E11.5	C558	0.0298942	-107.019	-199.271	G1	Seuratcds	1207433	3966	3	0	3	C1_3	C1	3	NA	NA	NA	NA	NA	NA	NA	NA	NA	NA	NA	NA	NA	NA	NA	NA	0	0	lineage3	0.0104633
C564	5	1697071	4689	E11.5	C564	0.0303517	-145.337	-170.896	G1	Seuratcds	1206300	4670	5	0	5	C1_5	C1	5	NA	NA	NA	NA	NA	NA	NA	NA	NA	NA	NA	NA	NA	NA	NA	NA	0	0	lineage3	1.65496
C573	0	1610279	5271	E11.5	C573	0.0352293	116.56	187.298	G2M	Seuratcds	1205619	5255	0	0	0	C1_0	C1	0	NA	NA	NA	NA	NA	NA	NA	NA	NA	NA	NA	NA	NA	NA	NA	NA	0	0	lineage3	3.40306
C574	12	1761065	5053	E11.5	C574	0.0312368	95.7634	252.933	G2M	Seuratcds	1207740	5036	12	0	12	C1_12	C1	12	NA	NA	NA	NA	NA	NA	NA	NA	NA	NA	NA	NA	NA	NA	NA	NA	0	0	lineage3	1.75705
C575	3	411561	4404	E11.5	C575	0.0519364	-32.4962	-41.088	G1	Seuratcds	1189978	4398	3	0	3	C1_3	C1	3	NA	NA	NA	NA	NA	NA	NA	NA	NA	NA	NA	NA	NA	NA	NA	NA	0	0	lineage3	0.0666116
C577	3	453366	3027	E11.5	C577	0.0472047	-33.1661	-53.6624	G1	Seuratcds	1194196	3055	3	0	3	C1_3	C1	3	NA	NA	NA	NA	NA	NA	NA	NA	NA	NA	NA	NA	NA	NA	NA	NA	0	0	lineage3	1.65501
C580	5	1909353	4722	E11.5	C580	0.0338649	-140.678	-217.221	G1	Seuratcds	1209489	4706	5	0	5	C1_5	C1	5	NA	NA	NA	NA	NA	NA	NA	NA	NA	NA	NA	NA	NA	NA	NA	NA	0	0	lineage3	0.0381599
C602	12	1621589	4592	E12.5	C602	0.0265887	-87.907	444.01	G2M	Seuratcds	1207052	4584	12	0	12	C1_12	C1	12	NA	NA	NA	NA	NA	NA	NA	NA	NA	NA	NA	NA	NA	NA	NA	NA	0	0	lineage3	2.39993
C603	3	1625081	3548	E12.5	C603	0.032999	-75.092	-160.555	G1	Seuratcds	1205809	3504	3	0	3	C1_3	C1	3	NA	NA	NA	NA	NA	NA	NA	NA	NA	NA	NA	NA	NA	NA	NA	NA	0	0	lineage3	0.0381023
C605	0	2239123	3910	E12.5	C605	0.0300689	320.159	-164.517	S	Seuratcds	1209386	3847	0	0	0	C1_0	C1	0	NA	NA	NA	NA	NA	NA	NA	NA	NA	NA	NA	NA	NA	NA	NA	NA	0	0	lineage3	0.056288
C619	5	1430454	3881	E12.5	C619	0.0246397	41.4176	-109.62	S	Seuratcds	1205242	3873	5	0	5	C1_5	C1	5	NA	NA	NA	NA	NA	NA	NA	NA	NA	NA	NA	NA	NA	NA	NA	NA	0	0	lineage3	0.0380446
C622	3	523011	2167	E12.5	C622	0.0297546	-38.3131	-20.6312	G1	Seuratcds	1194712	2199	3	0	3	C1_3	C1	3	NA	NA	NA	NA	NA	NA	NA	NA	NA	NA	NA	NA	NA	NA	NA	NA	0	0	lineage3	1.85576
C627	0	2045707	5067	E12.5	C627	0.0222969	-99.502	293.662	G2M	Seuratcds	1214251	5051	0	0	0	C1_0	C1	0	NA	NA	NA	NA	NA	NA	NA	NA	NA	NA	NA	NA	NA	NA	NA	NA	0	0	lineage3	0.037987
C630	3	967249	2923	E12.5	C630	0.0304182	-36.929	-16.805	G1	Seuratcds	1201847	2888	3	0	3	C1_3	C1	3	NA	NA	NA	NA	NA	NA	NA	NA	NA	NA	NA	NA	NA	NA	NA	NA	0	0	lineage3	0.0179889
C633	0	1656070	4191	E12.5	C633	0.0243607	-53.6423	228.836	G2M	Seuratcds	1209319	4159	0	0	0	C1_0	C1	0	NA	NA	NA	NA	NA	NA	NA	NA	NA	NA	NA	NA	NA	NA	NA	NA	0	0	lineage3	3.57474
C666	1	1545336	4239	E12.5	C666	0.0221842	16.0597	935.357	G2M	Seuratcds	1207323	4231	1	0	1	C1_1	C1	1	NA	NA	NA	NA	NA	NA	NA	NA	NA	NA	NA	NA	NA	NA	NA	NA	0	0	lineage3	4.75983
C667	12	543523	3090	E12.5	C667	0.0354815	13.8506	143.982	G2M	Seuratcds	1198515	3097	12	0	12	C1_12	C1	12	NA	NA	NA	NA	NA	NA	NA	NA	NA	NA	NA	NA	NA	NA	NA	NA	0	0	lineage3	3.53356
C673	3	745702	2416	E12.5	C673	0.0328617	65.5304	-57.2305	S	Seuratcds	1200454	2412	3	0	3	C1_3	C1	3	NA	NA	NA	NA	NA	NA	NA	NA	NA	NA	NA	NA	NA	NA	NA	NA	0	0	lineage3	0.0923625
C674	5	2363007	4082	E12.5	C674	0.0328069	-80.2022	-177.006	G1	Seuratcds	1207817	3915	5	0	5	C1_5	C1	5	NA	NA	NA	NA	NA	NA	NA	NA	NA	NA	NA	NA	NA	NA	NA	NA	0	0	lineage3	4.0984
C701	0	1076573	6433	E12.5	C701	0.0285508	61.8555	116.774	G2M	Seuratcds	1203207	6417	0	0	0	C1_0	C1	0	NA	NA	NA	NA	NA	NA	NA	NA	NA	NA	NA	NA	NA	NA	NA	NA	0	0	lineage3	4.17399
C709	5	944915	4791	E12.5	C709	0.0375039	-41.4935	343.152	G2M	Seuratcds	1201380	4781	5	0	5	C1_5	C1	5	NA	NA	NA	NA	NA	NA	NA	NA	NA	NA	NA	NA	NA	NA	NA	NA	0	0	lineage3	0.0379294
C710	12	725742	4050	E12.5	C710	0.034978	-10.7112	29.9016	G2M	Seuratcds	1200755	4012	12	0	12	C1_12	C1	12	NA	NA	NA	NA	NA	NA	NA	NA	NA	NA	NA	NA	NA	NA	NA	NA	0	0	lineage3	3.84532
C725	5	1378605	5627	E12.5	C725	0.0292259	350.76	-92.049	S	Seuratcds	1204763	5614	5	0	5	C1_5	C1	5	NA	NA	NA	NA	NA	NA	NA	NA	NA	NA	NA	NA	NA	NA	NA	NA	0	0	lineage3	4.17405
C736	5	1466292	5723	E12.5	C736	0.0325044	-33.9461	75.1481	G2M	Seuratcds	1205041	5710	5	0	5	C1_5	C1	5	NA	NA	NA	NA	NA	NA	NA	NA	NA	NA	NA	NA	NA	NA	NA	NA	0	0	lineage3	4.00859
C752	0	1304206	4700	E12.5	C752	0.0255872	-78.3641	109.979	G2M	Seuratcds	1204228	4680	0	0	0	C1_0	C1	0	NA	NA	NA	NA	NA	NA	NA	NA	NA	NA	NA	NA	NA	NA	NA	NA	0	0	lineage3	3.12403
C757	12	1384264	4117	E12.5	C757	0.0399006	-76.6544	-125.446	G1	Seuratcds	1206086	4104	12	0	12	C1_12	C1	12	NA	NA	NA	NA	NA	NA	NA	NA	NA	NA	NA	NA	NA	NA	NA	NA	0	0	lineage3	0.110869
C762	6	1829743	6999	E12.5	C762	0.0287592	7.02355	427.936	G2M	Seuratcds	1207092	6981	6	0	6	C1_6	C1	6	NA	NA	NA	NA	NA	NA	NA	NA	NA	NA	NA	NA	NA	NA	NA	NA	0	0	lineage3	2.52379
C770	0	1236407	3564	E12.5	C770	0.0288942	-40.9384	-128.685	G1	Seuratcds	1204790	3561	0	0	0	C1_0	C1	0	NA	NA	NA	NA	NA	NA	NA	NA	NA	NA	NA	NA	NA	NA	NA	NA	0	0	lineage3	3.38597
C772	0	1993318	6241	E12.5	C772	0.0273975	67.0006	590.988	G2M	Seuratcds	1208369	6226	0	0	0	C1_0	C1	0	NA	NA	NA	NA	NA	NA	NA	NA	NA	NA	NA	NA	NA	NA	NA	NA	0	0	lineage3	0.0378717
C773	12	849845	5008	E12.5	C773	0.0361795	163.614	-5.91476	S	Seuratcds	1198893	4953	12	0	12	C1_12	C1	12	NA	NA	NA	NA	NA	NA	NA	NA	NA	NA	NA	NA	NA	NA	NA	NA	0	0	lineage3	4.19651
C784	3	762152	3054	E12.5	C784	0.0590302	-42.7957	-73.5416	G1	Seuratcds	1197317	3043	3	0	3	C1_3	C1	3	NA	NA	NA	NA	NA	NA	NA	NA	NA	NA	NA	NA	NA	NA	NA	NA	0	0	lineage3	0.0446189
C788	0	1444742	4128	E12.5	C788	0.0394818	-30.9587	197.949	G2M	Seuratcds	1203064	4113	0	0	0	C1_0	C1	0	NA	NA	NA	NA	NA	NA	NA	NA	NA	NA	NA	NA	NA	NA	NA	NA	0	0	lineage3	3.63204
C794	8	812197	3093	E12.5	C794	0.0406822	-50.0563	-98.8762	G1	Seuratcds	1199696	3090	8	0	8	C1_8	C1	8	NA	NA	NA	NA	NA	NA	NA	NA	NA	NA	NA	NA	NA	NA	NA	NA	0	0	lineage3	1.65507
C126	9	1871028	8184	E17.5	C126	0.020981	-174.695	-171.947	G1	Seuratcds	1216029	8170	9	2	9	C1_9	C1	9	NA	NA	NA	NA	NA	NA	NA	NA	NA	NA	NA	NA	NA	NA	NA	NA	2	2	lineage2	6.79769
C132	9	1928051	8163	E17.5	C132	0.0224792	-226.712	-194.094	G1	Seuratcds	1214089	8137	9	2	9	C1_9	C1	9	NA	NA	NA	NA	NA	NA	NA	NA	NA	NA	NA	NA	NA	NA	NA	NA	2	2	lineage2	6.87185
C133	9	1701745	7427	E17.5	C133	0.0181543	-124.738	-202.434	G1	Seuratcds	1207633	7412	9	2	9	C1_9	C1	9	NA	NA	NA	NA	NA	NA	NA	NA	NA	NA	NA	NA	NA	NA	NA	NA	2	2	lineage2	7.01747
C135	9	1732575	7354	E17.5	C135	0.0243528	-170.683	-212.632	G1	Seuratcds	1209364	7332	9	2	9	C1_9	C1	9	NA	NA	NA	NA	NA	NA	NA	NA	NA	NA	NA	NA	NA	NA	NA	NA	2	2	lineage2	6.86407
C211	9	1886440	3816	E17.5	C211	0.0363134	-149.77	-170.026	G1	Seuratcds	1206489	3803	9	2	9	C1_9	C1	9	NA	NA	NA	NA	NA	NA	NA	NA	NA	NA	NA	NA	NA	NA	NA	NA	2	2	lineage2	6.84064
C217	4	1671962	5707	E17.5	C217	0.0259037	-65.1692	-175.045	G1	Seuratcds	1206924	5687	4	2	4_1	C1_4_1	C1	4_1	NA	NA	NA	NA	NA	NA	NA	NA	NA	NA	NA	NA	NA	NA	NA	NA	2	2	lineage2	7.19603
C226	9	1930699	3875	E17.5	C226	0.0318216	-169.386	-193.847	G1	Seuratcds	1210960	3847	9	2	9	C1_9	C1	9	NA	NA	NA	NA	NA	NA	NA	NA	NA	NA	NA	NA	NA	NA	NA	NA	2	2	lineage2	6.20019
C250	9	2302355	4224	E17.5	C250	0.0268955	-131.431	-281.599	G1	Seuratcds	1211079	4040	9	2	9	C1_9	C1	9	NA	NA	NA	NA	NA	NA	NA	NA	NA	NA	NA	NA	NA	NA	NA	NA	2	2	lineage2	6.70311
C255	9	2217698	3725	E17.5	C255	0.0271958	-103.165	-205.404	G1	Seuratcds	1211835	3583	9	2	9	C1_9	C1	9	NA	NA	NA	NA	NA	NA	NA	NA	NA	NA	NA	NA	NA	NA	NA	NA	2	2	lineage2	7.35942
C256	2	65944	3607	E17.5	C256	0.0913351	-7.79945	-10.0128	G1	Seuratcds	1110845	10236	2	0	2_0	C1_2_0	C1	2_0	NA	NA	NA	NA	NA	NA	NA	NA	NA	NA	NA	NA	NA	NA	NA	NA	0	0	lineage2	5.17793
C305	1	293856	2217	E14.5	C305	0.029477	0.155146	-31.8242	S	Seuratcds	1192512	2559	1	2	1	C1_1	C1	1	NA	NA	NA	NA	NA	NA	NA	NA	NA	NA	NA	NA	NA	NA	NA	NA	2	2	lineage2	5.7886
C311	1	764997	4660	E14.5	C311	0.0272236	-73.2367	-76.0314	G1	Seuratcds	1194881	4624	1	2	1	C1_1	C1	1	NA	NA	NA	NA	NA	NA	NA	NA	NA	NA	NA	NA	NA	NA	NA	NA	2	2	lineage2	6.6793
C317	1	582514	4179	E14.5	C317	0.0192802	-28.1648	-51.5227	G1	Seuratcds	1186339	4169	1	2	1	C1_1	C1	1	NA	NA	NA	NA	NA	NA	NA	NA	NA	NA	NA	NA	NA	NA	NA	NA	2	2	lineage2	5.20173
C321	9	1333395	4496	E14.5	C321	0.0223355	50.0014	307.11	G2M	Seuratcds	1205402	4488	9	0	9	C1_9	C1	9	NA	NA	NA	NA	NA	NA	NA	NA	NA	NA	NA	NA	NA	NA	NA	NA	0	0	lineage2	1.09617
C326	1	648828	3353	E14.5	C326	0.0320979	-46.5946	-78.5696	G1	Seuratcds	1191069	3344	1	2	1	C1_1	C1	1	NA	NA	NA	NA	NA	NA	NA	NA	NA	NA	NA	NA	NA	NA	NA	NA	2	2	lineage2	4.47058
C327	1	555889	2835	E14.5	C327	0.0245391	-57.526	-50.1576	G1	Seuratcds	1190714	2838	1	2	1	C1_1	C1	1	NA	NA	NA	NA	NA	NA	NA	NA	NA	NA	NA	NA	NA	NA	NA	NA	2	2	lineage2	5.58899
C346	7	854153	2881	E14.5	C346	0.0284282	-69.0887	-106.894	G1	Seuratcds	1202081	2878	7	0	7	C1_7	C1	7	NA	NA	NA	NA	NA	NA	NA	NA	NA	NA	NA	NA	NA	NA	NA	NA	0	0	lineage2	3.12711
C351	1	622930	3338	E14.5	C351	0.0229448	-24.8029	-64.8775	G1	Seuratcds	1194008	3330	1	0	1	C1_1	C1	1	NA	NA	NA	NA	NA	NA	NA	NA	NA	NA	NA	NA	NA	NA	NA	NA	0	0	lineage2	2.89422
C353	1	427509	3219	E14.5	C353	0.0251012	-29.0707	-40.97	G1	Seuratcds	1188934	3266	1	2	1	C1_1	C1	1	NA	NA	NA	NA	NA	NA	NA	NA	NA	NA	NA	NA	NA	NA	NA	NA	2	2	lineage2	5.3454
C356	1	557708	2730	E14.5	C356	0.025759	-31.0291	-57.3943	G1	Seuratcds	1194463	2731	1	2	1	C1_1	C1	1	NA	NA	NA	NA	NA	NA	NA	NA	NA	NA	NA	NA	NA	NA	NA	NA	2	2	lineage2	4.46418
C358	1	237660	2570	E14.5	C358	0.0282715	-6.40416	-18.084	G1	Seuratcds	1186688	3084	1	0	1	C1_1	C1	1	NA	NA	NA	NA	NA	NA	NA	NA	NA	NA	NA	NA	NA	NA	NA	NA	0	0	lineage2	4.05135
C360	1	911138	3799	E14.5	C360	0.0221361	-57.5882	-91.5003	G1	Seuratcds	1200215	3786	1	2	1	C1_1	C1	1	NA	NA	NA	NA	NA	NA	NA	NA	NA	NA	NA	NA	NA	NA	NA	NA	2	2	lineage2	5.36462
C365	1	551252	2808	E14.5	C365	0.0287836	-12.8987	-64.6049	G1	Seuratcds	1194497	2818	1	0	1	C1_1	C1	1	NA	NA	NA	NA	NA	NA	NA	NA	NA	NA	NA	NA	NA	NA	NA	NA	0	0	lineage2	4.4704
C368	1	539584	2495	E14.5	C368	0.0287184	-34.2944	-65.2946	G1	Seuratcds	1191567	2512	1	0	1	C1_1	C1	1	NA	NA	NA	NA	NA	NA	NA	NA	NA	NA	NA	NA	NA	NA	NA	NA	0	0	lineage2	2.92476
C369	1	79133	2456	E14.5	C369	0.0248948	-4.80739	-10.0058	G1	Seuratcds	1191715	8367	1	0	1	C1_1	C1	1	NA	NA	NA	NA	NA	NA	NA	NA	NA	NA	NA	NA	NA	NA	NA	NA	0	0	lineage2	6.83404
C371	1	599445	2793	E14.5	C371	0.0253151	-35.3724	-65.0511	G1	Seuratcds	1195516	2795	1	2	1	C1_1	C1	1	NA	NA	NA	NA	NA	NA	NA	NA	NA	NA	NA	NA	NA	NA	NA	NA	2	2	lineage2	4.47063
C374	1	824542	3252	E14.5	C374	0.0200887	-69.6499	-84.0927	G1	Seuratcds	1197721	3246	1	2	1	C1_1	C1	1	NA	NA	NA	NA	NA	NA	NA	NA	NA	NA	NA	NA	NA	NA	NA	NA	2	2	lineage2	5.64415
C376	1	400573	2259	E14.5	C376	0.0211297	-24.4031	-26.3526	G1	Seuratcds	1186374	2373	1	2	1	C1_1	C1	1	NA	NA	NA	NA	NA	NA	NA	NA	NA	NA	NA	NA	NA	NA	NA	NA	2	2	lineage2	5.2261
C416	0	449988	4311	E14.5	C416	0.0298875	-42.1836	-54.6751	G1	Seuratcds	1189868	4312	0	0	0	C1_0	C1	0	NA	NA	NA	NA	NA	NA	NA	NA	NA	NA	NA	NA	NA	NA	NA	NA	0	0	lineage2	1.39781
C442	0	1135674	4123	E14.5	C442	0.0224809	-70.5052	-125.634	G1	Seuratcds	1203671	4118	0	0	0	C1_0	C1	0	NA	NA	NA	NA	NA	NA	NA	NA	NA	NA	NA	NA	NA	NA	NA	NA	0	0	lineage2	2.33172
C444	5	1361302	5011	E14.5	C444	0.0306934	-68.5323	-150.661	G1	Seuratcds	1204277	4999	5	0	5	C1_5	C1	5	NA	NA	NA	NA	NA	NA	NA	NA	NA	NA	NA	NA	NA	NA	NA	NA	0	0	lineage2	1.10958
C458	0	982296	4116	E14.5	C458	0.0304827	-21.2469	-71.704	G1	Seuratcds	1200851	4102	0	0	0	C1_0	C1	0	NA	NA	NA	NA	NA	NA	NA	NA	NA	NA	NA	NA	NA	NA	NA	NA	0	0	lineage2	2.44855
C486	5	1357367	4183	E14.5	C486	0.0256298	-73.741	-136.261	G1	Seuratcds	1204000	4174	5	0	5	C1_5	C1	5	NA	NA	NA	NA	NA	NA	NA	NA	NA	NA	NA	NA	NA	NA	NA	NA	0	0	lineage2	0.0382175
C489	3	746265	3277	E14.5	C489	0.0367497	-52.6226	-81.4509	G1	Seuratcds	1200908	3275	3	0	3	C1_3	C1	3	NA	NA	NA	NA	NA	NA	NA	NA	NA	NA	NA	NA	NA	NA	NA	NA	0	0	lineage2	1.65484
C496	0	1306722	3645	E14.5	C496	0.0272552	-50.9154	38.5317	G2M	Seuratcds	1203010	3640	0	0	0	C1_0	C1	0	NA	NA	NA	NA	NA	NA	NA	NA	NA	NA	NA	NA	NA	NA	NA	NA	0	0	lineage2	1.38029
C507	5	2339948	4428	E11.5	C507	0.0307725	-201.965	-51.7202	G1	Seuratcds	1207955	4245	5	0	5	C1_5	C1	5	NA	NA	NA	NA	NA	NA	NA	NA	NA	NA	NA	NA	NA	NA	NA	NA	0	0	lineage2	1.07582
C511	3	936363	3386	E11.5	C511	0.0343691	-58.7129	-45.1045	G1	Seuratcds	1202515	3381	3	0	3	C1_3	C1	3	NA	NA	NA	NA	NA	NA	NA	NA	NA	NA	NA	NA	NA	NA	NA	NA	0	0	lineage2	0.230883
C512	8	1139137	3753	E11.5	C512	0.036417	78.9258	-94.6751	S	Seuratcds	1203311	3745	8	0	8	C1_8	C1	8	NA	NA	NA	NA	NA	NA	NA	NA	NA	NA	NA	NA	NA	NA	NA	NA	0	0	lineage2	1.4745
C519	1	2175144	5576	E11.5	C519	0.0316696	-17.4307	1157.01	G2M	Seuratcds	1209912	5536	1	0	1	C1_1	C1	1	NA	NA	NA	NA	NA	NA	NA	NA	NA	NA	NA	NA	NA	NA	NA	NA	0	0	lineage2	1.36602
C524	3	1108452	3978	E11.5	C524	0.055979	-80.283	-77.6857	G1	Seuratcds	1203330	3970	3	0	3	C1_3	C1	3	NA	NA	NA	NA	NA	NA	NA	NA	NA	NA	NA	NA	NA	NA	NA	NA	0	0	lineage2	0
C531	5	1710198	5292	E11.5	C531	0.0297182	240.689	80.1221	S	Seuratcds	1205812	5284	5	0	5	C1_5	C1	5	NA	NA	NA	NA	NA	NA	NA	NA	NA	NA	NA	NA	NA	NA	NA	NA	0	0	lineage2	1.60882
C534	3	206602	3457	E11.5	C534	0.0807301	19.7642	-8.40178	S	Seuratcds	1176553	4018	3	0	3	C1_3	C1	3	NA	NA	NA	NA	NA	NA	NA	NA	NA	NA	NA	NA	NA	NA	NA	NA	0	0	lineage2	0.158317
C540	3	1213136	3463	E11.5	C540	0.0525209	-73.1949	-131.335	G1	Seuratcds	1204325	3456	3	0	3	C1_3	C1	3	NA	NA	NA	NA	NA	NA	NA	NA	NA	NA	NA	NA	NA	NA	NA	NA	0	0	lineage2	0.872057
C556	3	477763	3537	E11.5	C556	0.0684817	77.5405	-11.4778	S	Seuratcds	1188109	3538	3	0	3	C1_3	C1	3	NA	NA	NA	NA	NA	NA	NA	NA	NA	NA	NA	NA	NA	NA	NA	NA	0	0	lineage2	1.39107
C557	3	284954	2899	E11.5	C557	0.0823887	94.7223	-17.6742	S	Seuratcds	1179498	3170	3	0	3	C1_3	C1	3	NA	NA	NA	NA	NA	NA	NA	NA	NA	NA	NA	NA	NA	NA	NA	NA	0	0	lineage2	1.6549
C558	3	1898728	3976	E11.5	C558	0.0298942	-107.019	-199.271	G1	Seuratcds	1207433	3966	3	0	3	C1_3	C1	3	NA	NA	NA	NA	NA	NA	NA	NA	NA	NA	NA	NA	NA	NA	NA	NA	0	0	lineage2	0.0104633
C560	1	1587789	4747	E11.5	C560	0.0320175	232.534	-105.012	S	Seuratcds	1205343	4722	1	0	1	C1_1	C1	1	NA	NA	NA	NA	NA	NA	NA	NA	NA	NA	NA	NA	NA	NA	NA	NA	0	0	lineage2	2.98914
C564	5	1697071	4689	E11.5	C564	0.0303517	-145.337	-170.896	G1	Seuratcds	1206300	4670	5	0	5	C1_5	C1	5	NA	NA	NA	NA	NA	NA	NA	NA	NA	NA	NA	NA	NA	NA	NA	NA	0	0	lineage2	1.65496
C575	3	411561	4404	E11.5	C575	0.0519364	-32.4962	-41.088	G1	Seuratcds	1189978	4398	3	0	3	C1_3	C1	3	NA	NA	NA	NA	NA	NA	NA	NA	NA	NA	NA	NA	NA	NA	NA	NA	0	0	lineage2	0.0666116
C577	3	453366	3027	E11.5	C577	0.0472047	-33.1661	-53.6624	G1	Seuratcds	1194196	3055	3	0	3	C1_3	C1	3	NA	NA	NA	NA	NA	NA	NA	NA	NA	NA	NA	NA	NA	NA	NA	NA	0	0	lineage2	1.65501
C580	5	1909353	4722	E11.5	C580	0.0338649	-140.678	-217.221	G1	Seuratcds	1209489	4706	5	0	5	C1_5	C1	5	NA	NA	NA	NA	NA	NA	NA	NA	NA	NA	NA	NA	NA	NA	NA	NA	0	0	lineage2	0.0381599
C590	8	582530	3808	E11.5	C590	0.0355209	-11.2984	-50.2996	G1	Seuratcds	1196459	3799	8	0	8	C1_8	C1	8	NA	NA	NA	NA	NA	NA	NA	NA	NA	NA	NA	NA	NA	NA	NA	NA	0	0	lineage2	4.11293
C603	3	1625081	3548	E12.5	C603	0.032999	-75.092	-160.555	G1	Seuratcds	1205809	3504	3	0	3	C1_3	C1	3	NA	NA	NA	NA	NA	NA	NA	NA	NA	NA	NA	NA	NA	NA	NA	NA	0	0	lineage2	0.0381023
C605	0	2239123	3910	E12.5	C605	0.0300689	320.159	-164.517	S	Seuratcds	1209386	3847	0	0	0	C1_0	C1	0	NA	NA	NA	NA	NA	NA	NA	NA	NA	NA	NA	NA	NA	NA	NA	NA	0	0	lineage2	0.056288
C618	8	870430	2801	E12.5	C618	0.036752	-42.807	-90.7008	G1	Seuratcds	1200894	2788	8	0	8	C1_8	C1	8	NA	NA	NA	NA	NA	NA	NA	NA	NA	NA	NA	NA	NA	NA	NA	NA	0	0	lineage2	2.99714
C619	5	1430454	3881	E12.5	C619	0.0246397	41.4176	-109.62	S	Seuratcds	1205242	3873	5	0	5	C1_5	C1	5	NA	NA	NA	NA	NA	NA	NA	NA	NA	NA	NA	NA	NA	NA	NA	NA	0	0	lineage2	0.0380446
C625	0	1974025	3696	E12.5	C625	0.0168767	-53.91	-214.097	G1	Seuratcds	1210650	3688	0	0	0	C1_0	C1	0	NA	NA	NA	NA	NA	NA	NA	NA	NA	NA	NA	NA	NA	NA	NA	NA	0	0	lineage2	2.05418
C626	8	464500	2196	E12.5	C626	0.0318278	-31.1978	-62.7163	G1	Seuratcds	1192587	2255	8	0	8	C1_8	C1	8	NA	NA	NA	NA	NA	NA	NA	NA	NA	NA	NA	NA	NA	NA	NA	NA	0	0	lineage2	2.226
C627	0	2045707	5067	E12.5	C627	0.0222969	-99.502	293.662	G2M	Seuratcds	1214251	5051	0	0	0	C1_0	C1	0	NA	NA	NA	NA	NA	NA	NA	NA	NA	NA	NA	NA	NA	NA	NA	NA	0	0	lineage2	0.037987
C630	3	967249	2923	E12.5	C630	0.0304182	-36.929	-16.805	G1	Seuratcds	1201847	2888	3	0	3	C1_3	C1	3	NA	NA	NA	NA	NA	NA	NA	NA	NA	NA	NA	NA	NA	NA	NA	NA	0	0	lineage2	0.0179889
C636	8	1142893	4205	E12.5	C636	0.0391296	-58.4181	-80.3256	G1	Seuratcds	1203210	4174	8	0	8	C1_8	C1	8	NA	NA	NA	NA	NA	NA	NA	NA	NA	NA	NA	NA	NA	NA	NA	NA	0	0	lineage2	2.90499
C647	0	3000016	3128	E12.5	C647	0.0212929	-113.337	-159.913	G1	Seuratcds	1214455	2947	0	0	0	C1_0	C1	0	NA	NA	NA	NA	NA	NA	NA	NA	NA	NA	NA	NA	NA	NA	NA	NA	0	0	lineage2	1.89698
C658	0	353294	3310	E12.5	C658	0.0336971	-9.89409	-39.9162	G1	Seuratcds	1189976	3378	0	0	0	C1_0	C1	0	NA	NA	NA	NA	NA	NA	NA	NA	NA	NA	NA	NA	NA	NA	NA	NA	0	0	lineage2	2.4509
C673	3	745702	2416	E12.5	C673	0.0328617	65.5304	-57.2305	S	Seuratcds	1200454	2412	3	0	3	C1_3	C1	3	NA	NA	NA	NA	NA	NA	NA	NA	NA	NA	NA	NA	NA	NA	NA	NA	0	0	lineage2	0.0923625
C709	5	944915	4791	E12.5	C709	0.0375039	-41.4935	343.152	G2M	Seuratcds	1201380	4781	5	0	5	C1_5	C1	5	NA	NA	NA	NA	NA	NA	NA	NA	NA	NA	NA	NA	NA	NA	NA	NA	0	0	lineage2	0.0379294
C731	0	1186109	3264	E12.5	C731	0.0248577	-79.9689	-99.668	G1	Seuratcds	1202985	3258	0	0	0	C1_0	C1	0	NA	NA	NA	NA	NA	NA	NA	NA	NA	NA	NA	NA	NA	NA	NA	NA	0	0	lineage2	2.48851
C737	8	990904	3302	E12.5	C737	0.0322998	-54.8683	-110.988	G1	Seuratcds	1202288	3296	8	0	8	C1_8	C1	8	NA	NA	NA	NA	NA	NA	NA	NA	NA	NA	NA	NA	NA	NA	NA	NA	0	0	lineage2	1.95912
C757	12	1384264	4117	E12.5	C757	0.0399006	-76.6544	-125.446	G1	Seuratcds	1206086	4104	12	0	12	C1_12	C1	12	NA	NA	NA	NA	NA	NA	NA	NA	NA	NA	NA	NA	NA	NA	NA	NA	0	0	lineage2	0.110869
C772	0	1993318	6241	E12.5	C772	0.0273975	67.0006	590.988	G2M	Seuratcds	1208369	6226	0	0	0	C1_0	C1	0	NA	NA	NA	NA	NA	NA	NA	NA	NA	NA	NA	NA	NA	NA	NA	NA	0	0	lineage2	0.0378717
C784	3	762152	3054	E12.5	C784	0.0590302	-42.7957	-73.5416	G1	Seuratcds	1197317	3043	3	0	3	C1_3	C1	3	NA	NA	NA	NA	NA	NA	NA	NA	NA	NA	NA	NA	NA	NA	NA	NA	0	0	lineage2	0.0446189
C790	1	995331	3936	E12.5	C790	0.0298514	-45.8522	-97.8925	G1	Seuratcds	1201573	3924	1	0	1	C1_1	C1	1	NA	NA	NA	NA	NA	NA	NA	NA	NA	NA	NA	NA	NA	NA	NA	NA	0	0	lineage2	2.82801
C794	8	812197	3093	E12.5	C794	0.0406822	-50.0563	-98.8762	G1	Seuratcds	1199696	3090	8	0	8	C1_8	C1	8	NA	NA	NA	NA	NA	NA	NA	NA	NA	NA	NA	NA	NA	NA	NA	NA	0	0	lineage2	1.65507
