# Supplementary material for: Cardiac neural crest lineage diversity and underlying gene regulatory networks revealed by multimodal analysis
Source: Research Square preprint supplement (doi:10.21203/rs.3.rs-1756528/v1), 2022-06-24
Supplement: Supplementary file 3 [file SupplementaryData4.xlsx]

## Sheet: Visium_E14.5_metadata
	orig.ident	nCount_Spatial	nFeature_Spatial	slice	nCount_SCT	nFeature_SCT	SCT_snn_res.1	seurat_clusters
AAACTGCTGGCTCCAA-1_1	E14.5_1	92243	9279	E14.5_1	63272	8983	6	6
AAATACCTATAAGCAT-1_1	E14.5_1	97691	9362	E14.5_1	63207	8929	6	6
AAATAGGGTGCTATTG-1_1	E14.5_1	97955	9486	E14.5_1	63309	9109	11	11
AAATCGTGTACCACAA-1_1	E14.5_1	69541	8509	E14.5_1	64137	8502	10	10
AAATTAACGGGTAGCT-1_1	E14.5_1	23547	6030	E14.5_1	62576	7809	12	12
AACCTTTAAATACGGT-1_1	E14.5_1	110531	9650	E14.5_1	63081	8964	18	18
AACGATAATGCCGTAG-1_1	E14.5_1	102088	9523	E14.5_1	63216	9003	11	11
AACGTGCGAAAGTCTC-1_1	E14.5_1	55497	8554	E14.5_1	61977	8550	3	3
AACTAGGCTTGGGTGT-1_1	E14.5_1	43663	7575	E14.5_1	62764	7671	0	0
AAGAGGCATGGATCGC-1_1	E14.5_1	60865	8467	E14.5_1	62374	8450	16	16
AAGCATACTCTCCTGA-1_1	E14.5_1	103634	9632	E14.5_1	63382	9119	18	18
AAGCTAGATCGAGTAA-1_1	E14.5_1	102847	9442	E14.5_1	63146	8908	6	6
AAGCTCGTGCCAAGTC-1_1	E14.5_1	57789	8756	E14.5_1	61922	8747	3	3
AAGTGTTTGGAGACGG-1_1	E14.5_1	92090	9406	E14.5_1	63440	9149	11	11
AATCGCCTCAGCGCCA-1_1	E14.5_1	64880	8615	E14.5_1	63853	8603	16	16
AATGACGTAGGATGTC-1_1	E14.5_1	95282	9531	E14.5_1	63425	9237	11	11
AATTAGCGCTGCAGCG-1_1	E14.5_1	93152	9371	E14.5_1	63475	9098	18	18
AATTCTAGAGTTAGGC-1_1	E14.5_1	75434	8886	E14.5_1	63930	8877	17	17
AATTGAACGCTCTGGT-1_1	E14.5_1	79823	8965	E14.5_1	63700	8920	0	0
ACAAATCGCACCGAAT-1_1	E14.5_1	114513	9618	E14.5_1	63013	8893	11	11
ACAAATGGTAGTGTTT-1_1	E14.5_1	58059	8409	E14.5_1	62126	8400	5	5
ACAACAGCATGAGCTA-1_1	E14.5_1	30040	6919	E14.5_1	62122	7913	9	9
ACAAGGAAATCCGCCC-1_1	E14.5_1	86862	9260	E14.5_1	63589	9109	14	14
ACAAGGGCAGGCTCTG-1_1	E14.5_1	113180	9823	E14.5_1	63251	9131	6	6
ACACGGGAACTTAGGG-1_1	E14.5_1	36898	7525	E14.5_1	62081	7953	8	8
ACATCGATCGTTTACC-1_1	E14.5_1	58428	8138	E14.5_1	62201	8131	10	10
ACATCGTATGCAATGG-1_1	E14.5_1	94694	9480	E14.5_1	63312	9127	11	11
ACATTAGTTTATATCC-1_1	E14.5_1	86806	9358	E14.5_1	63628	9196	18	18
ACCAATATGCAAGTTA-1_1	E14.5_1	75575	8742	E14.5_1	63933	8723	11	11
ACCACGTGCAGCTATA-1_1	E14.5_1	75568	8999	E14.5_1	63925	8980	14	14
ACCATATCCGCAATAA-1_1	E14.5_1	21414	5792	E14.5_1	62414	7958	12	12
ACCCTCCCTTGCTATT-1_1	E14.5_1	83131	9020	E14.5_1	63511	8931	11	11
ACCGACTGAGTCCCAC-1_1	E14.5_1	12513	4288	E14.5_1	61983	8344	15	15
ACCGCAATAACTGCCT-1_1	E14.5_1	101495	9510	E14.5_1	63352	9015	11	11
ACGCATTCGTGAGTAC-1_1	E14.5_1	27340	6249	E14.5_1	62826	7626	12	12
ACGCCGCTAGACGACC-1_1	E14.5_1	82057	9270	E14.5_1	63740	9213	6	6
ACGCGAAGTCAGACGA-1_1	E14.5_1	65962	8474	E14.5_1	63974	8467	17	17
ACGCGGGCCAAGGACA-1_1	E14.5_1	34906	7021	E14.5_1	62857	7552	12	12
ACGGATGGTGCGGATA-1_1	E14.5_1	52426	8109	E14.5_1	62313	8099	0	0
ACGGCACTTGCTTGGG-1_1	E14.5_1	81183	9130	E14.5_1	63749	9082	18	18
ACGGCCAACATGGACT-1_1	E14.5_1	12027	4093	E14.5_1	62594	8215	0	0
ACGGCGACGATGGGAA-1_1	E14.5_1	76221	9023	E14.5_1	63936	9005	14	14
ACGTAGATTGCTGATG-1_1	E14.5_1	45199	7851	E14.5_1	62325	7931	3	3
ACGTTAATGTCGAAGA-1_1	E14.5_1	52871	8692	E14.5_1	62056	8682	4	4
ACTCAATAAAGGCACG-1_1	E14.5_1	48921	8566	E14.5_1	62139	8575	8	8
ACTCCCTAGAATAGTA-1_1	E14.5_1	91260	9141	E14.5_1	63304	8886	6	6
ACTCGTCAGTAATCCC-1_1	E14.5_1	66506	8719	E14.5_1	64076	8709	16	16
ACTCTCTGACTTAGGT-1_1	E14.5_1	81367	9224	E14.5_1	63714	9166	0	0
ACTCTTGTATAGTAAC-1_1	E14.5_1	49303	8177	E14.5_1	62208	8188	3	3
ACTGAATGGCGAAAGT-1_1	E14.5_1	78546	8841	E14.5_1	63694	8819	11	11
ACTTACGCATCCACGC-1_1	E14.5_1	29328	6569	E14.5_1	62804	7631	0	0
ACTTCAGGCTGATCCC-1_1	E14.5_1	101107	9520	E14.5_1	63339	9092	11	11
ACTTGACTCCCTCTTT-1_1	E14.5_1	73753	9202	E14.5_1	64140	9192	10	10
ACTTTCCTATAGCTTC-1_1	E14.5_1	11767	4040	E14.5_1	62137	8388	15	15
AGAACGTGGTACATTC-1_1	E14.5_1	50258	8459	E14.5_1	62079	8467	8	8
AGACCCACCGCTGATC-1_1	E14.5_1	82417	9043	E14.5_1	63612	8975	17	17
AGATACTCAAGATCGA-1_1	E14.5_1	80300	8838	E14.5_1	63661	8798	11	11
AGCACCAGTACTCACG-1_1	E14.5_1	14467	4772	E14.5_1	61627	8314	7	7
AGCACTACCTCACCAG-1_1	E14.5_1	88997	9113	E14.5_1	63361	8901	11	11
AGCGTGGTATTCTACT-1_1	E14.5_1	90962	9258	E14.5_1	63394	9019	6	6
AGCTCTAGACGTTCCA-1_1	E14.5_1	42738	7661	E14.5_1	62650	7765	9	9
AGGACAGTCGAATCCC-1_1	E14.5_1	71085	8814	E14.5_1	64178	8805	5	5
AGGATAAAGTCGGGAT-1_1	E14.5_1	105344	9658	E14.5_1	63263	9088	18	18
AGGGCTGCAGTTACAG-1_1	E14.5_1	29215	6787	E14.5_1	62539	7854	9	9
AGGTTGAGGCACGCTT-1_1	E14.5_1	57777	8758	E14.5_1	61909	8745	8	8
AGGTTTCACACACCTT-1_1	E14.5_1	57581	8747	E14.5_1	62009	8739	4	4
AGTTCCTATTTATGTT-1_1	E14.5_1	72912	8941	E14.5_1	64103	8933	10	10
ATAAACGGACCCGTAA-1_1	E14.5_1	71085	8676	E14.5_1	64114	8669	17	17
ATAAGGTGGAGAACAT-1_1	E14.5_1	103484	9372	E14.5_1	63093	8814	6	6
ATAAGTTACCGCGACG-1_1	E14.5_1	15592	4662	E14.5_1	63010	8058	0	0
ATAATAGCTGTTGAAT-1_1	E14.5_1	72238	8807	E14.5_1	64104	8798	17	17
ATACAGGCCCTCCAAT-1_1	E14.5_1	69005	8642	E14.5_1	64204	8634	0	0
ATACGTACTTAGCCAC-1_1	E14.5_1	84735	9200	E14.5_1	63700	9100	11	11
ATAGGGATATCCTTGA-1_1	E14.5_1	53105	8786	E14.5_1	61937	8766	8	8
ATAGGTTGGGCAGATG-1_1	E14.5_1	19414	5536	E14.5_1	62067	8084	7	7
ATAGTGAAGCGTTCTC-1_1	E14.5_1	37241	7284	E14.5_1	62645	7667	12	12
ATATAAATGTAGCTGC-1_1	E14.5_1	99979	9431	E14.5_1	63256	8982	11	11
ATATCTTAGGGCCTTC-1_1	E14.5_1	22262	5791	E14.5_1	62772	7856	12	12
ATATTCCACATAGTGA-1_1	E14.5_1	76819	9046	E14.5_1	63929	9035	14	14
ATCATCCAATATTTGT-1_1	E14.5_1	57192	8284	E14.5_1	62164	8280	5	5
ATCGACCCAATACAGA-1_1	E14.5_1	81081	9051	E14.5_1	63654	9000	20	20
ATCGGAGACAGACGGC-1_1	E14.5_1	70322	8785	E14.5_1	64232	8774	14	14
ATCTAATATCCTACGG-1_1	E14.5_1	73894	8811	E14.5_1	63994	8800	13	13
ATGCGACAGTCCCATT-1_1	E14.5_1	52037	8366	E14.5_1	62074	8367	3	3
ATGGAGCAGGCCGTGA-1_1	E14.5_1	47609	8036	E14.5_1	62250	8052	3	3
ATGTGGACATCTTGAT-1_1	E14.5_1	90412	9191	E14.5_1	63367	8975	6	6
ATTAAACATGCGGACC-1_1	E14.5_1	62596	8318	E14.5_1	62859	8310	10	10
ATTAGGCGATGCTTTC-1_1	E14.5_1	72251	9234	E14.5_1	64227	9210	3	3
ATTATGCCATAGGGAG-1_1	E14.5_1	25830	6453	E14.5_1	61880	7911	19	19
ATTCACTGATGTTGGA-1_1	E14.5_1	28541	6333	E14.5_1	63034	7535	0	0
ATTCATATACTGTCCA-1_1	E14.5_1	53083	7944	E14.5_1	62370	7933	17	17
ATTTGTCTTGGGAGCT-1_1	E14.5_1	69883	8655	E14.5_1	64144	8645	16	16
CAAATGTCCTTCCGTG-1_1	E14.5_1	42415	7375	E14.5_1	62863	7531	0	0
CAACGACCCGTTTACA-1_1	E14.5_1	28690	6833	E14.5_1	61837	7974	19	19
CAAGAGGGCGGAGTAC-1_1	E14.5_1	87294	9299	E14.5_1	63479	9148	14	14
CAAGCGGCACATAATT-1_1	E14.5_1	94972	9252	E14.5_1	63358	8921	11	11
CAAGGATCGCATGTTC-1_1	E14.5_1	52134	8411	E14.5_1	62132	8404	4	4
CAATAAACCTTGGCCC-1_1	E14.5_1	53033	8563	E14.5_1	61986	8556	8	8
CAATGCGAGAAGTATC-1_1	E14.5_1	61128	8367	E14.5_1	62446	8356	0	0
CAATTAAGGGTGATGA-1_1	E14.5_1	28509	6553	E14.5_1	62383	7800	7	7
CAATTTCGTATAAGGG-1_1	E14.5_1	32393	6846	E14.5_1	62870	7649	12	12
CACAGCACCCACGGCA-1_1	E14.5_1	8680	3433	E14.5_1	61639	8562	15	15
CACATATTAGCAGGAT-1_1	E14.5_1	89827	9302	E14.5_1	63398	9064	14	14
CACATCTCACCGACGA-1_1	E14.5_1	63009	8307	E14.5_1	63025	8299	11	11
CACCCTAACAAGATCT-1_1	E14.5_1	65624	8575	E14.5_1	63977	8563	0	0
CACCTAATCAGTTTAC-1_1	E14.5_1	41328	7641	E14.5_1	62295	7846	9	9
CACGCACAGCGCAGCT-1_1	E14.5_1	66614	9388	E14.5_1	64321	9361	8	8
CACGTTCGTGCTCTAG-1_1	E14.5_1	80239	9126	E14.5_1	63772	9069	16	16
CACTCAAGAGCTATGG-1_1	E14.5_1	47018	7630	E14.5_1	62694	7650	5	5
CACTCGAGCTGAACAA-1_1	E14.5_1	87704	9338	E14.5_1	63582	9182	14	14
CAGAGACGGTCACCCA-1_1	E14.5_1	93671	9216	E14.5_1	63193	8854	13	13
CAGAGCATGAGCTTGC-1_1	E14.5_1	39923	7741	E14.5_1	62177	8012	8	8
CAGCTCACTGAGACAT-1_1	E14.5_1	22125	5796	E14.5_1	62621	7856	12	12
CAGGATATATCGTTGT-1_1	E14.5_1	61834	8397	E14.5_1	62589	8385	20	20
CAGGCGCCATGCTAGG-1_1	E14.5_1	93697	9266	E14.5_1	63258	8953	17	17
CAGTCTGTATACTGGG-1_1	E14.5_1	64127	8757	E14.5_1	63666	8745	10	10
CAGTGAATAAATGACT-1_1	E14.5_1	33690	7061	E14.5_1	62438	7783	15	15
CATACGGCGTCTGGGC-1_1	E14.5_1	32845	6870	E14.5_1	62798	7586	4	4
CATCGGACGGGTTAAT-1_1	E14.5_1	42246	7396	E14.5_1	62819	7514	0	0
CATGGTAAGTAGCGTT-1_1	E14.5_1	101954	9548	E14.5_1	63224	9061	6	6
CATGTCTCATTTATGG-1_1	E14.5_1	32089	6786	E14.5_1	62877	7609	0	0
CCAAGCGTAACTCGTA-1_1	E14.5_1	36471	7462	E14.5_1	62170	7928	9	9
CCACAATGTACGTCTT-1_1	E14.5_1	40258	7741	E14.5_1	62291	7989	15	15
CCACCCAAGGAAAGTG-1_1	E14.5_1	43689	7957	E14.5_1	62515	8028	9	9
CCAGATAGTTGAGTGA-1_1	E14.5_1	41395	7796	E14.5_1	62246	7962	15	15
CCAGCCTGGACCAATA-1_1	E14.5_1	38661	7632	E14.5_1	62465	7895	9	9
CCATCGCAGTTAAACT-1_1	E14.5_1	83877	9159	E14.5_1	63630	9054	18	18
CCATTTCTACCTATTA-1_1	E14.5_1	79756	9048	E14.5_1	63780	9008	0	0
CCCAGTTAAGGCGCCG-1_1	E14.5_1	58233	8511	E14.5_1	62152	8504	5	5
CCCGCAGCGCGAACTA-1_1	E14.5_1	90364	9199	E14.5_1	63364	8948	6	6
CCCTTTGACAGGTCTT-1_1	E14.5_1	65859	8290	E14.5_1	63955	8284	10	10
CCGAACCTTCCCGGCC-1_1	E14.5_1	97838	9308	E14.5_1	63238	8888	6	6
CCGCATGTGGTACGAT-1_1	E14.5_1	24027	5824	E14.5_1	62949	7601	0	0
CCGCTATCAGCACCAG-1_1	E14.5_1	50271	7917	E14.5_1	62484	7916	1	1
CCGGGCGGTCTCGTCA-1_1	E14.5_1	35441	7302	E14.5_1	62379	7802	3	3
CCGTAAGTTGGTCCCA-1_1	E14.5_1	49885	8241	E14.5_1	62187	8253	3	3
CCTAAATTAACGGTTC-1_1	E14.5_1	76147	9551	E14.5_1	64212	9524	4	4
CCTATAATGAGTGCCC-1_1	E14.5_1	70650	8676	E14.5_1	64173	8671	0	0
CCTATGGGTTACCGTC-1_1	E14.5_1	22724	6007	E14.5_1	61998	7966	15	15
CCTCGGACCGGGATAG-1_1	E14.5_1	81223	9011	E14.5_1	63615	8946	16	16
CCTCTAATCTGCCAAG-1_1	E14.5_1	78408	9887	E14.5_1	64461	9808	8	8
CCTCTGTACTATTCTA-1_1	E14.5_1	108363	9638	E14.5_1	63201	8987	18	18
CCTGAATATTTACATA-1_1	E14.5_1	76423	9829	E14.5_1	64382	9763	8	8
CCTGACCACCGATGGT-1_1	E14.5_1	46405	7657	E14.5_1	62718	7686	1	1
CCTGTCACCCGGGCTC-1_1	E14.5_1	12886	4434	E14.5_1	61636	8318	15	15
CCTGTCGCCCGTAAAT-1_1	E14.5_1	18020	5348	E14.5_1	62307	8024	12	12
CGAGACCCTAGAGTGT-1_1	E14.5_1	63538	8475	E14.5_1	63385	8465	20	20
CGAGAGATGTGAACCT-1_1	E14.5_1	36716	7442	E14.5_1	62351	7897	9	9
CGAGGCTAAATATGGC-1_1	E14.5_1	34782	7391	E14.5_1	62263	7962	9	9
CGAGGGACTGCGGTCG-1_1	E14.5_1	68506	8775	E14.5_1	64219	8765	16	16
CGATTCGCCTGGCTGC-1_1	E14.5_1	55114	8178	E14.5_1	62228	8169	0	0
CGCATGGTGCGATGCT-1_1	E14.5_1	51624	8305	E14.5_1	62277	8304	4	4
CGCCGCCCATGCCTGT-1_1	E14.5_1	64337	8563	E14.5_1	63697	8553	16	16
CGCCTCCCTCCTCTAT-1_1	E14.5_1	94992	9553	E14.5_1	63534	9237	6	6
CGCGCATGTTTGATTG-1_1	E14.5_1	64443	8526	E14.5_1	63723	8516	0	0
CGCTATTCTTAGGCTC-1_1	E14.5_1	46388	7701	E14.5_1	62630	7743	5	5
CGGAGCAATTTAATCG-1_1	E14.5_1	95081	9238	E14.5_1	63113	8824	13	13
CGGAGCATGGCGATCC-1_1	E14.5_1	54780	8570	E14.5_1	62069	8560	3	3
CGGCAAACATCGTGCG-1_1	E14.5_1	114602	9767	E14.5_1	63098	8994	18	18
CGGCCACGCACAAAGT-1_1	E14.5_1	27719	6399	E14.5_1	62978	7712	12	12
CGGGAATTTATGTAAA-1_1	E14.5_1	78362	8931	E14.5_1	63728	8906	17	17
CGGGCCTTCTTTGTAA-1_1	E14.5_1	43595	7671	E14.5_1	62605	7756	12	12
CGGTACTAGAATCAAA-1_1	E14.5_1	73336	8878	E14.5_1	64074	8861	5	5
CGTCGTCCTTCGCGAA-1_1	E14.5_1	78255	8823	E14.5_1	63766	8793	11	11
CGTGAAGTTAATTCAC-1_1	E14.5_1	40458	7250	E14.5_1	62892	7450	5	5
CGTGCAGACTGGGACA-1_1	E14.5_1	23708	6038	E14.5_1	62580	7792	4	4
CGTGCCCTCCCGAAGA-1_1	E14.5_1	86764	9176	E14.5_1	63477	9034	6	6
CGTTGAATACCGCGCT-1_1	E14.5_1	68975	8689	E14.5_1	64157	8680	11	11
CGTTGAGCGACCGTCG-1_1	E14.5_1	87447	9149	E14.5_1	63471	8972	6	6
CTAAAGGGAAATAGGA-1_1	E14.5_1	77469	8929	E14.5_1	63798	8901	20	20
CTAAGGGAATGATTGG-1_1	E14.5_1	106610	9717	E14.5_1	63263	9110	6	6
CTACGCACGGAGTACC-1_1	E14.5_1	14086	4601	E14.5_1	62285	8258	15	15
CTACTGCCACCTGACC-1_1	E14.5_1	4433	2217	E14.5_1	60749	8841	15	15
CTAGATTTACGACGGC-1_1	E14.5_1	82399	9354	E14.5_1	63730	9304	10	10
CTAGCATAGTATAATG-1_1	E14.5_1	37569	7532	E14.5_1	62224	7917	9	9
CTAGTTACAACCCGGT-1_1	E14.5_1	112637	9723	E14.5_1	63285	9042	18	18
CTAGTTGGGCCCGGTA-1_1	E14.5_1	18298	5537	E14.5_1	61790	8187	7	7
CTATTCATGTGTCCCA-1_1	E14.5_1	100058	9591	E14.5_1	63438	9165	18	18
CTATTTGGTTACGGAT-1_1	E14.5_1	58557	8377	E14.5_1	62160	8367	16	16
CTCGCACCTATATAGT-1_1	E14.5_1	45540	8328	E14.5_1	62129	8404	8	8
CTCGGTACCACTGCTC-1_1	E14.5_1	65609	8727	E14.5_1	63976	8716	16	16
CTCTATTTGGCTGCAG-1_1	E14.5_1	81418	8926	E14.5_1	63613	8867	6	6
CTCTCACAATCGATGA-1_1	E14.5_1	40477	7626	E14.5_1	62357	7856	9	9
CTCTTGTCCCGCTTGG-1_1	E14.5_1	33913	6968	E14.5_1	62916	7567	0	0
CTGAATCCGAGACCTC-1_1	E14.5_1	53352	7888	E14.5_1	62349	7883	0	0
CTGCACAACTACATAT-1_1	E14.5_1	79777	9103	E14.5_1	63814	9063	14	14
CTGCACTCCAGTACAG-1_1	E14.5_1	88430	9185	E14.5_1	63471	9009	2	2
CTGCCATGCATCACAT-1_1	E14.5_1	43588	7575	E14.5_1	62719	7656	10	10
CTGCTTGGCGATAGCT-1_1	E14.5_1	70348	8780	E14.5_1	64197	8772	14	14
CTGGATTTACACTTGA-1_1	E14.5_1	52487	7810	E14.5_1	62426	7810	10	10
CTGGGATAAATAATGG-1_1	E14.5_1	88195	9288	E14.5_1	63491	9087	16	16
CTGGGTAGGCAGTTAA-1_1	E14.5_1	73339	8928	E14.5_1	64087	8917	0	0
CTGTGCAGGGTAGGTC-1_1	E14.5_1	70608	9140	E14.5_1	64298	9129	4	4
CTGTTACCCAATCTAG-1_1	E14.5_1	62323	8379	E14.5_1	62746	8372	17	17
CTTCATTGTCAGTGGA-1_1	E14.5_1	23937	5997	E14.5_1	62636	7799	12	12
CTTGCCCAGGCTCTAC-1_1	E14.5_1	54019	7841	E14.5_1	62359	7833	10	10
CTTGTACTTGTTGACT-1_1	E14.5_1	28335	6732	E14.5_1	61907	7916	19	19
CTTGTCAACATTCGAG-1_1	E14.5_1	97868	9386	E14.5_1	63207	8958	6	6
CTTGTTGCTGAGTCAA-1_1	E14.5_1	51552	8071	E14.5_1	62381	8064	16	16
CTTTAATATTGGTCGA-1_1	E14.5_1	92195	9446	E14.5_1	63420	9182	14	14
CTTTACCGAATAGTAG-1_1	E14.5_1	51736	7864	E14.5_1	62469	7859	0	0
CTTTAGGAACACTGTT-1_1	E14.5_1	63347	8550	E14.5_1	63313	8539	5	5
CTTTAGTGCTATTATT-1_1	E14.5_1	65391	8525	E14.5_1	63927	8518	1	1
CTTTCTGTGCGGGCTT-1_1	E14.5_1	95511	9311	E14.5_1	63281	8942	18	18
GAAGCGTGAGGAATTT-1_1	E14.5_1	29480	6474	E14.5_1	62896	7562	12	12
GAAGTCAGTTGCACTA-1_1	E14.5_1	107290	9493	E14.5_1	62936	8787	13	13
GAATCTGAACATTCTC-1_1	E14.5_1	65187	8618	E14.5_1	63894	8603	10	10
GAATGTGGTCCGGATT-1_1	E14.5_1	56069	8250	E14.5_1	62132	8241	0	0
GAATGTTGGGTAATCT-1_1	E14.5_1	39744	7960	E14.5_1	62021	8164	8	8
GAATTATAGTGAAAGG-1_1	E14.5_1	51149	8182	E14.5_1	62185	8183	3	3
GAATTCACCCGGGTGT-1_1	E14.5_1	66324	8389	E14.5_1	63983	8382	10	10
GACAACGCAGCTTACG-1_1	E14.5_1	19778	5585	E14.5_1	62054	8081	19	19
GACACAAGGGAAGAAA-1_1	E14.5_1	28781	6761	E14.5_1	62177	7941	9	9
GACAGCCAGACCTGAC-1_1	E14.5_1	65651	8602	E14.5_1	63957	8586	5	5
GACGACGATCCGCGTT-1_1	E14.5_1	101707	9463	E14.5_1	63188	8975	6	6
GACTGCACCAGCCCAG-1_1	E14.5_1	96624	9490	E14.5_1	63369	9111	14	14
GAGACTTCGCGACCGA-1_1	E14.5_1	76398	8823	E14.5_1	63793	8791	13	13
GAGATCTTCCATGACA-1_1	E14.5_1	93269	9559	E14.5_1	63550	9298	14	14
GAGATGGGAGTCGACA-1_1	E14.5_1	104428	9499	E14.5_1	63113	8907	6	6
GAGCTAAGGGCATATC-1_1	E14.5_1	19509	5644	E14.5_1	62098	8103	15	15
GAGTCCGCTTACCGGA-1_1	E14.5_1	56355	8121	E14.5_1	62187	8111	20	20
GATAGGTAACGTTGAC-1_1	E14.5_1	68042	8534	E14.5_1	64147	8525	17	17
GATATGAGACACTAAC-1_1	E14.5_1	68596	8828	E14.5_1	64222	8816	16	16
GATCCGGGAATTAACA-1_1	E14.5_1	76376	9406	E14.5_1	64061	9394	4	4
GATCGGTGGCCATAAC-1_1	E14.5_1	5446	2619	E14.5_1	60695	8789	15	15
GATCGTGACTGATATC-1_1	E14.5_1	74373	9444	E14.5_1	64225	9430	9	9
GATCTTGGAGGGCATA-1_1	E14.5_1	105614	9739	E14.5_1	63383	9227	6	6
GATGCGTCCTGCATTC-1_1	E14.5_1	15966	4936	E14.5_1	62490	8132	12	12
GATGCTGTATTTCATC-1_1	E14.5_1	109458	9793	E14.5_1	63256	9154	6	6
GATTCCCTTGTCGCAG-1_1	E14.5_1	14905	5024	E14.5_1	61654	8313	7	7
GATTCGACGGTTCACG-1_1	E14.5_1	58767	8651	E14.5_1	62082	8641	4	4
GCAAACCCTACATTAT-1_1	E14.5_1	102812	9481	E14.5_1	63143	8957	11	11
GCAGATTAGGGATATC-1_1	E14.5_1	23557	6026	E14.5_1	62577	7804	12	12
GCATAGAGCACTCAGG-1_1	E14.5_1	34613	6882	E14.5_1	62927	7476	5	5
GCCCGATCTGTGGTCG-1_1	E14.5_1	113290	9679	E14.5_1	63181	8945	18	18
GCCGATTGGCCAAGCT-1_1	E14.5_1	50506	7965	E14.5_1	62481	7961	10	10
GCCGGGTTAGGGTCGC-1_1	E14.5_1	37813	7239	E14.5_1	62748	7590	0	0
GCCTCTATACATAGCA-1_1	E14.5_1	82329	9057	E14.5_1	63652	8993	11	11
GCGAAACTTAACTGGA-1_1	E14.5_1	70392	8882	E14.5_1	64166	8877	0	0
GCGACGATAGTTGTAC-1_1	E14.5_1	53914	7700	E14.5_1	62379	7695	10	10
GCGAGTTCTGCAAAGA-1_1	E14.5_1	25683	6158	E14.5_1	62752	7737	12	12
GCGATTGTTAACGTTA-1_1	E14.5_1	68903	8909	E14.5_1	64228	8894	16	16
GCGCCGTTCCACGATA-1_1	E14.5_1	54857	8339	E14.5_1	62178	8330	10	10
GCGCTAATTGAATAGA-1_1	E14.5_1	56122	8453	E14.5_1	62008	8445	3	3
GCGGAGAGGGAGAACG-1_1	E14.5_1	82823	9160	E14.5_1	63570	9087	14	14
GCGTCGCCAGGGTGAT-1_1	E14.5_1	71462	8515	E14.5_1	64049	8509	13	13
GCTACGACTTATTGGG-1_1	E14.5_1	80735	9255	E14.5_1	63840	9213	10	10
GCTAGTAGAGCTTGTA-1_1	E14.5_1	38424	7660	E14.5_1	62565	7922	4	4
GCTATCATACTCATGG-1_1	E14.5_1	88132	9237	E14.5_1	63581	9087	11	11
GCTGAGGCGTGAGTAT-1_1	E14.5_1	49062	8048	E14.5_1	62508	8050	10	10
GCTGCACGGTTTCTTA-1_1	E14.5_1	49756	8319	E14.5_1	62252	8314	4	4
GCTGCTACTGCGTAGC-1_1	E14.5_1	73223	8907	E14.5_1	64080	8891	14	14
GCTGGCGGCGCATGCT-1_1	E14.5_1	101298	9517	E14.5_1	63141	9002	13	13
GCTTAATGTAACTAAC-1_1	E14.5_1	76870	9094	E14.5_1	63920	9076	16	16
GGAATGCGCTAGCGTG-1_1	E14.5_1	45108	7969	E14.5_1	62232	8040	21	21
GGACCAACAGGATAAC-1_1	E14.5_1	115479	9656	E14.5_1	62881	8836	6	6
GGAGACGACACCTTTG-1_1	E14.5_1	79239	9313	E14.5_1	63914	9277	10	10
GGAGGGCTTGGTTGGC-1_1	E14.5_1	53449	8380	E14.5_1	62055	8376	3	3
GGATTTCACTTCTATA-1_1	E14.5_1	48733	8321	E14.5_1	62197	8336	15	15
GGCAAGGCGAAATAGC-1_1	E14.5_1	97462	9424	E14.5_1	63240	9029	6	6
GGCAATAGTCAATGAG-1_1	E14.5_1	32478	7187	E14.5_1	62280	7946	9	9
GGCGCGTTCGAGTTTA-1_1	E14.5_1	64104	8477	E14.5_1	63614	8460	17	17
GGCTCTGCTCCAACGC-1_1	E14.5_1	47667	8305	E14.5_1	62103	8332	8	8
GGCTGAAATAGCAAAG-1_1	E14.5_1	96771	9489	E14.5_1	63426	9149	14	14
GGGAGTTAATGAGGCG-1_1	E14.5_1	34667	7184	E14.5_1	62265	7756	3	3
GGGCTGCCTAGGGCGA-1_1	E14.5_1	50353	8135	E14.5_1	62204	8146	3	3
GGGTGACACCTTAACT-1_1	E14.5_1	53246	7832	E14.5_1	62346	7829	20	20
GGTACAAACATGCTAT-1_1	E14.5_1	20999	5652	E14.5_1	62536	7889	12	12
GGTAGAAGACCGCCTG-1_1	E14.5_1	95948	9292	E14.5_1	63250	8892	11	11
GGTAGTGCTCGCACCA-1_1	E14.5_1	45315	8135	E14.5_1	62119	8194	3	3
GGTCAGTGGGTCCCAC-1_1	E14.5_1	69184	8640	E14.5_1	64183	8630	17	17
GGTGATAAGGAGCAGT-1_1	E14.5_1	67643	8734	E14.5_1	64179	8720	16	16
GGTTTACAATCTCAAT-1_1	E14.5_1	55931	8954	E14.5_1	61821	8938	8	8
GTAAGTAACAGTCTGG-1_1	E14.5_1	53032	8074	E14.5_1	62301	8066	16	16
GTACACTTACCTGAAG-1_1	E14.5_1	33383	7121	E14.5_1	62703	7747	12	12
GTACAGAGGCAAGGGT-1_1	E14.5_1	73921	8979	E14.5_1	64060	8968	16	16
GTACGCTTCATTGCAC-1_1	E14.5_1	92002	9266	E14.5_1	63343	8975	6	6
GTACGTTTGCCCGTCA-1_1	E14.5_1	92478	9442	E14.5_1	63402	9142	6	6
GTACTGGAGTTAGACC-1_1	E14.5_1	53558	8505	E14.5_1	62048	8490	21	21
GTAGCCAAACATGGGA-1_1	E14.5_1	94673	9297	E14.5_1	63394	8964	6	6
GTAGCGGCTATACACT-1_1	E14.5_1	48771	8294	E14.5_1	62194	8295	3	3
GTAGTCGCGGGAATCA-1_1	E14.5_1	109943	9730	E14.5_1	63251	9039	11	11
GTATCTTTCATAACCA-1_1	E14.5_1	76820	8993	E14.5_1	63860	8974	17	17
GTCAAGCGGACTCGGG-1_1	E14.5_1	42449	7774	E14.5_1	62647	7889	4	4
GTCATTAGAGCGAACG-1_1	E14.5_1	49639	8061	E14.5_1	62217	8070	3	3
GTCCCAACGTAAAGTA-1_1	E14.5_1	35054	7459	E14.5_1	62093	8006	9	9
GTCGCGTAACCCGTTG-1_1	E14.5_1	35623	7286	E14.5_1	62581	7749	4	4
GTCGTACCATCTCGGG-1_1	E14.5_1	39015	7154	E14.5_1	62981	7411	1	1
GTCGTTATTCGCTTAT-1_1	E14.5_1	79426	9084	E14.5_1	63753	9049	14	14
GTGAGGACACTTAAGG-1_1	E14.5_1	66042	8822	E14.5_1	64077	8810	0	0
GTGAGTGGTACAACGC-1_1	E14.5_1	74421	8646	E14.5_1	63934	8637	13	13
GTGATCATAGATCTGC-1_1	E14.5_1	72902	8664	E14.5_1	64038	8655	20	20
GTGCCCGTTCGGATTC-1_1	E14.5_1	84992	9081	E14.5_1	63497	8947	16	16
GTGCGTGTATATGAGC-1_1	E14.5_1	74803	8829	E14.5_1	63941	8815	16	16
GTGGTGGCCAAGTGAA-1_1	E14.5_1	95818	9465	E14.5_1	63378	9150	14	14
GTGTATATCAGCGGGC-1_1	E14.5_1	28760	6431	E14.5_1	62954	7569	0	0
GTGTCGTATAGCGTTC-1_1	E14.5_1	40955	7288	E14.5_1	62756	7445	14	14
GTGTTACTATGCGTCC-1_1	E14.5_1	78177	9266	E14.5_1	63967	9253	10	10
GTTAAAGTAGGACTGG-1_1	E14.5_1	85892	9025	E14.5_1	63466	8884	11	11
GTTAACATCACTTAAA-1_1	E14.5_1	93566	9217	E14.5_1	63266	8878	11	11
GTTACCTACAACTTGC-1_1	E14.5_1	80826	8967	E14.5_1	63671	8923	6	6
GTTATATTATCTCCCT-1_1	E14.5_1	52917	7989	E14.5_1	62311	7977	20	20
GTTGAGTCCCGCCGGT-1_1	E14.5_1	81895	9100	E14.5_1	63739	9051	14	14
GTTGGTCATGCTATCC-1_1	E14.5_1	68764	8647	E14.5_1	64151	8637	13	13
GTTTACGTTCCATCTG-1_1	E14.5_1	76003	8916	E14.5_1	63899	8901	17	17
GTTTCTGCAGTCTCCC-1_1	E14.5_1	50087	8397	E14.5_1	62143	8395	4	4
GTTTGGGCTTGTGAGC-1_1	E14.5_1	90896	9351	E14.5_1	63417	9098	18	18
GTTTGGTAGGGTCAAC-1_1	E14.5_1	87455	9183	E14.5_1	63374	9007	13	13
TAAGGCAACATAAGAT-1_1	E14.5_1	56851	8923	E14.5_1	61864	8908	8	8
TAATAGTGACGACCAG-1_1	E14.5_1	23614	6210	E14.5_1	62116	7993	15	15
TACATTTCTAACGTGC-1_1	E14.5_1	31318	6754	E14.5_1	62713	7634	12	12
TACCGGCTCACTGCCC-1_1	E14.5_1	84660	9039	E14.5_1	63482	8939	17	17
TACCGTGCCTCGGACC-1_1	E14.5_1	101502	9506	E14.5_1	63156	8991	6	6
TACGACGCTTGCTGCG-1_1	E14.5_1	58810	8066	E14.5_1	62252	8059	10	10
TACGACTGCCTCTTAG-1_1	E14.5_1	70393	8810	E14.5_1	64197	8801	10	10
TACGCCATATTCTAAT-1_1	E14.5_1	54080	8224	E14.5_1	62231	8211	12	12
TAGAAAGGTGGCGCTA-1_1	E14.5_1	45183	8023	E14.5_1	62216	8080	21	21
TAGATATGGACTGGAA-1_1	E14.5_1	48660	7716	E14.5_1	62539	7722	0	0
TAGCGTCCGGTGTGGT-1_1	E14.5_1	68929	8702	E14.5_1	64226	8691	14	14
TAGCGTTGGGTCTTAC-1_1	E14.5_1	53171	8492	E14.5_1	62074	8479	3	3
TAGCTCGCCTGATAAC-1_1	E14.5_1	88235	9127	E14.5_1	63362	8921	20	20
TAGGTGCTCGCCTAGC-1_1	E14.5_1	78242	8969	E14.5_1	63735	8943	16	16
TAGGTTCGAGTTCGTC-1_1	E14.5_1	45901	7887	E14.5_1	62298	7950	3	3
TATACACAGACGCCTT-1_1	E14.5_1	76353	8910	E14.5_1	63990	8896	17	17
TATCCAATTGGTTATC-1_1	E14.5_1	85093	9066	E14.5_1	63550	8965	11	11
TATCTACCACAGCGGG-1_1	E14.5_1	51960	7881	E14.5_1	62415	7871	10	10
TATGGGACCGAGCAGG-1_1	E14.5_1	9027	3513	E14.5_1	61634	8507	15	15
TATGGGTACGTATCGT-1_1	E14.5_1	14563	4663	E14.5_1	62238	8190	15	15
TATGGTCTGAGTAACA-1_1	E14.5_1	19971	5489	E14.5_1	62801	7959	12	12
TATGTCTCATTGTGCC-1_1	E14.5_1	41162	7776	E14.5_1	62271	7959	21	21
TATTCAATTCTAATCC-1_1	E14.5_1	49847	8252	E14.5_1	62139	8258	3	3
TATTCCACTCAGCTCG-1_1	E14.5_1	61239	8309	E14.5_1	62462	8305	20	20
TCACAGGGAATCGCAA-1_1	E14.5_1	79880	9062	E14.5_1	63734	9029	14	14
TCACCCTCTTAAGATT-1_1	E14.5_1	57943	8137	E14.5_1	62157	8127	20	20
TCAGACGCTATAGAAG-1_1	E14.5_1	95157	9325	E14.5_1	63228	8946	6	6
TCAGGGTGTAACGTAA-1_1	E14.5_1	41636	7796	E14.5_1	62167	8005	8	8
TCCAGAGCACCGGTTC-1_1	E14.5_1	51709	8528	E14.5_1	62098	8520	4	4
TCCCAGCTTTAGTCTG-1_1	E14.5_1	7404	3136	E14.5_1	61328	8608	15	15
TCCCGCGTACTCCTGG-1_1	E14.5_1	21310	5983	E14.5_1	61991	8106	8	8
TCCCGTGTGCAATTTG-1_1	E14.5_1	82121	9132	E14.5_1	63640	9065	0	0
TCCGCCTGTCTACAAG-1_1	E14.5_1	78103	8784	E14.5_1	63764	8759	11	11
TCCGCTGTCATCCCGG-1_1	E14.5_1	94333	9484	E14.5_1	63411	9167	14	14
TCCGCTTATCCCATTA-1_1	E14.5_1	86489	9169	E14.5_1	63546	9014	17	17
TCCGGTTCGTCCGGTC-1_1	E14.5_1	14115	4439	E14.5_1	62727	8151	0	0
TCCTAAATTGGGAAGC-1_1	E14.5_1	30295	6474	E14.5_1	63027	7486	0	0
TCCTACATCCACGGCC-1_1	E14.5_1	58755	8238	E14.5_1	62170	8230	0	0
TCCTCGGGCTGGGCTT-1_1	E14.5_1	51671	8373	E14.5_1	62275	8368	4	4
TCGCAAAGATGCATTT-1_1	E14.5_1	86637	9241	E14.5_1	63559	9087	14	14
TCGCACCAGGAGGCAG-1_1	E14.5_1	89477	9283	E14.5_1	63455	9076	11	11
TCGGACGCCCAGCCCA-1_1	E14.5_1	42103	7925	E14.5_1	62188	8064	21	21
TCGGAGTACATGAGTA-1_1	E14.5_1	20022	5729	E14.5_1	61986	8077	15	15
TCGTCTTAGGCGTTAA-1_1	E14.5_1	49815	7752	E14.5_1	62532	7759	0	0
TCGTGTACTATGGATG-1_1	E14.5_1	1963	1195	E14.5_1	60685	9126	0	0
TCGTTAGGAGTCCCTA-1_1	E14.5_1	15168	4716	E14.5_1	62619	8128	0	0
TCTACCGTCCACAAGC-1_1	E14.5_1	15008	4959	E14.5_1	61428	8298	7	7
TCTAGCATGCCCAGAA-1_1	E14.5_1	87886	9141	E14.5_1	63471	8979	17	17
TCTCCCTGGGCAGCGT-1_1	E14.5_1	97391	9360	E14.5_1	63300	8985	11	11
TCTCTAATAGCTGGTA-1_1	E14.5_1	35406	7444	E14.5_1	62138	7979	19	19
TCTGATGTATTCTGTC-1_1	E14.5_1	74425	8735	E14.5_1	63967	8722	11	11
TCTGTGCCATCATAGT-1_1	E14.5_1	33223	7276	E14.5_1	62238	7887	21	21
TCTTCGAATAGACGTT-1_1	E14.5_1	54422	8562	E14.5_1	62066	8550	4	4
TCTTGATGCGTAGCGA-1_1	E14.5_1	26695	6533	E14.5_1	62191	7914	9	9
TGACTATAATCCTTTC-1_1	E14.5_1	87966	9249	E14.5_1	63457	9062	6	6
TGAGCGGAAAGTGTTC-1_1	E14.5_1	64780	8543	E14.5_1	63805	8535	13	13
TGAGTAAATTAGCGTA-1_1	E14.5_1	60435	8275	E14.5_1	62358	8264	20	20
TGAGTGGTCCGTGACG-1_1	E14.5_1	35747	7336	E14.5_1	62422	7838	15	15
TGCAAGAATGACGTAA-1_1	E14.5_1	32326	6795	E14.5_1	62586	7670	15	15
TGCAGGATCGGCAAAG-1_1	E14.5_1	51922	8603	E14.5_1	62031	8605	8	8
TGCCAGTACGTGGAGA-1_1	E14.5_1	97957	9323	E14.5_1	63202	8893	6	6
TGCCCGTACCGTTAAA-1_1	E14.5_1	116536	9968	E14.5_1	63293	9257	14	14
TGCCTGATCAAACGAT-1_1	E14.5_1	21078	5818	E14.5_1	61812	8078	9	9
TGCCTTGGCCAGGCAA-1_1	E14.5_1	87620	9039	E14.5_1	63379	8838	11	11
TGCGGAGTAAAGGTGC-1_1	E14.5_1	44326	8249	E14.5_1	62147	8328	8	8
TGCGTTTGTTGACACT-1_1	E14.5_1	105880	9687	E14.5_1	63285	9128	6	6
TGCTGTTGAAGAACTC-1_1	E14.5_1	51277	8308	E14.5_1	62219	8304	3	3
TGGACTGTTCGCTCAA-1_1	E14.5_1	67187	9280	E14.5_1	64294	9260	9	9
TGGCAAACTAAATTAC-1_1	E14.5_1	93525	9428	E14.5_1	63501	9147	14	14
TGGCAGATTACGATCA-1_1	E14.5_1	79576	8887	E14.5_1	63660	8851	20	20
TGGCGATCAAGTTATG-1_1	E14.5_1	78653	8788	E14.5_1	63693	8761	13	13
TGGCTTTGGGTAGACA-1_1	E14.5_1	17668	5330	E14.5_1	61860	8162	19	19
TGGTCCCACGCTACGG-1_1	E14.5_1	83062	9202	E14.5_1	63679	9123	14	14
TGGTTCAACGGGTAAT-1_1	E14.5_1	84342	9139	E14.5_1	63576	9048	14	14
TGTACGAACAAATCCG-1_1	E14.5_1	63018	8410	E14.5_1	63032	8400	5	5
TGTGACTACGCCAGTC-1_1	E14.5_1	53348	8716	E14.5_1	61943	8695	8	8
TGTTATTGTATGTGGC-1_1	E14.5_1	42612	7556	E14.5_1	62641	7673	5	5
TGTTCGTATTGCGGTG-1_1	E14.5_1	61292	8428	E14.5_1	62455	8422	17	17
TTACTAAAGGACTTTA-1_1	E14.5_1	92252	9352	E14.5_1	63508	9116	14	14
TTACTGGGATATTTCA-1_1	E14.5_1	50332	7761	E14.5_1	62501	7770	0	0
TTAGAAGAACATGACT-1_1	E14.5_1	111854	9799	E14.5_1	63336	9133	18	18
TTAGACGAGTCACCTC-1_1	E14.5_1	89740	9325	E14.5_1	63533	9154	14	14
TTATATACGCTGTCAC-1_1	E14.5_1	53127	8494	E14.5_1	62147	8478	9	9
TTATGAATGAAAGGGA-1_1	E14.5_1	53520	8181	E14.5_1	62254	8174	10	10
TTATGATCTTAACGAA-1_1	E14.5_1	76395	9043	E14.5_1	63922	9022	16	16
TTATTAGAGCGTGTTC-1_1	E14.5_1	87081	9094	E14.5_1	63388	8943	6	6
TTCAAAGTCTCTAGCC-1_1	E14.5_1	55196	8414	E14.5_1	62027	8403	3	3
TTCACTCGAGCACCTA-1_1	E14.5_1	67592	8755	E14.5_1	64169	8749	0	0
TTCAGCCCTGGTCCAC-1_1	E14.5_1	32054	6751	E14.5_1	62994	7565	0	0
TTCCGCGTGAGGCGAT-1_1	E14.5_1	77862	8873	E14.5_1	63711	8854	17	17
TTCCTCGAGGGTGTCT-1_1	E14.5_1	16551	5127	E14.5_1	61691	8241	19	19
TTCGACAGAGCCCGTG-1_1	E14.5_1	92031	9303	E14.5_1	63429	9021	18	18
TTCGGGACTAATCGCG-1_1	E14.5_1	53443	8677	E14.5_1	61978	8661	9	9
TTCTGACCGGGCTCAA-1_1	E14.5_1	47901	7922	E14.5_1	62502	7936	0	0
TTCTGCCGCGCCTAGA-1_1	E14.5_1	95103	9284	E14.5_1	63236	8899	6	6
TTCTGCGGGTTAGCGG-1_1	E14.5_1	65630	8734	E14.5_1	63965	8720	5	5
TTGAATATGGACTTTC-1_1	E14.5_1	44378	7990	E14.5_1	62227	8064	3	3
TTGCACAATTCAGAAA-1_1	E14.5_1	60293	8165	E14.5_1	62353	8159	10	10
TTGCTCCCATACCGGA-1_1	E14.5_1	71678	9728	E14.5_1	64505	9694	8	8
TTGCTGATCATGTTCG-1_1	E14.5_1	16030	4958	E14.5_1	62219	8151	15	15
TTGGATATCGTCTACG-1_1	E14.5_1	15296	4732	E14.5_1	62650	8070	0	0
TTGGGACACTGCCCGC-1_1	E14.5_1	23186	6051	E14.5_1	62306	7994	9	9
TTGTGTTTCCCGAAAG-1_1	E14.5_1	87289	9238	E14.5_1	63554	9098	18	18
TTGTTGTGTGTCAAGA-1_1	E14.5_1	38574	7473	E14.5_1	62266	7810	3	3
AAACTGCTGGCTCCAA-1_2	E14.5_2	60885	8281	E14.5_2	38177	7918	2	2
AAATACCTATAAGCAT-1_2	E14.5_2	49106	7691	E14.5_2	38287	7631	0	0
AAATCGTGTACCACAA-1_2	E14.5_2	57572	8042	E14.5_2	38196	7724	1	1
AAATTAACGGGTAGCT-1_2	E14.5_2	35192	7198	E14.5_2	36448	7185	3	3
AACGATAGAAGGGCCG-1_2	E14.5_2	31926	7090	E14.5_2	36101	7075	8	8
AAGACTGCAAGCTACT-1_2	E14.5_2	32230	6670	E14.5_2	36231	6660	5	5
AAGGAGCGGTTGGTGC-1_2	E14.5_2	14697	4754	E14.5_2	35738	5951	7	7
AATGCAACCGGGTACC-1_2	E14.5_2	11539	4167	E14.5_2	35453	5982	15	15
AATGGTTCTCACAAGC-1_2	E14.5_2	24565	6369	E14.5_2	35872	6452	19	19
AATTAAAGGTCGGCGT-1_2	E14.5_2	36530	7047	E14.5_2	36893	7032	1	1
AATTAGCGCTGCAGCG-1_2	E14.5_2	59774	8237	E14.5_2	38123	7865	0	0
AATTCTAGAGTTAGGC-1_2	E14.5_2	62889	8274	E14.5_2	38134	7770	2	2
ACACCCAGCATGCAGC-1_2	E14.5_2	27257	6570	E14.5_2	36035	6602	7	7
ACACCCGAGAAATCCG-1_2	E14.5_2	25657	6526	E14.5_2	35811	6576	19	19
ACATCGATCGTTTACC-1_2	E14.5_2	52450	7950	E14.5_2	38328	7819	2	2
ACATTAGTTTATATCC-1_2	E14.5_2	52610	7807	E14.5_2	38228	7661	0	0
ACCACAAGTTTCTATC-1_2	E14.5_2	31430	6877	E14.5_2	36108	6860	3	3
ACCATATCCGCAATAA-1_2	E14.5_2	32856	7290	E14.5_2	36101	7273	4	4
ACCCGGTTACACTTCC-1_2	E14.5_2	48244	7585	E14.5_2	38284	7521	1	1
ACCGACTGAGTCCCAC-1_2	E14.5_2	24716	6254	E14.5_2	36042	6360	7	7
ACGCGAAGTCAGACGA-1_2	E14.5_2	60587	8289	E14.5_2	38221	7916	2	2
ACGCGGGCCAAGGACA-1_2	E14.5_2	29641	6603	E14.5_2	36156	6600	5	5
ACTCAATAAAGGCACG-1_2	E14.5_2	15808	5020	E14.5_2	35722	6006	7	7
ACTGTCCAGGATTATA-1_2	E14.5_2	31655	6934	E14.5_2	36104	6926	3	3
ACTTATTAGGATCGGT-1_2	E14.5_2	32408	7090	E14.5_2	36110	7078	4	4
AGAAGGTTGCCGAATT-1_2	E14.5_2	46291	7416	E14.5_2	38284	7379	13	13
AGACCCACCGCTGATC-1_2	E14.5_2	60599	8281	E14.5_2	38177	7884	2	2
AGACCCGCCCTCCTCG-1_2	E14.5_2	14588	4743	E14.5_2	35731	5957	15	15
AGATGACTCGCCCACG-1_2	E14.5_2	22306	5976	E14.5_2	35932	6205	7	7
AGATTATAGGACGTTT-1_2	E14.5_2	32332	7274	E14.5_2	36060	7256	4	4
AGCATCGTCGATAATT-1_2	E14.5_2	23688	6155	E14.5_2	35958	6309	7	7
AGCTCTTTACTCAGTT-1_2	E14.5_2	44678	7237	E14.5_2	38310	7208	13	13
AGGACGACCCATTAGA-1_2	E14.5_2	47680	7441	E14.5_2	38286	7381	13	13
AGGCCCATTGTACAGG-1_2	E14.5_2	40253	7951	E14.5_2	38312	7915	22	22
AGGGCTGCAGTTACAG-1_2	E14.5_2	16553	4988	E14.5_2	35957	5829	5	5
AGGGTTTAGTTCGGGA-1_2	E14.5_2	28190	6388	E14.5_2	36182	6385	5	5
AGTCAACACCACCATC-1_2	E14.5_2	52020	7768	E14.5_2	38204	7622	1	1
AGTCTTCTCCTCAAAT-1_2	E14.5_2	14187	4817	E14.5_2	35602	6085	7	7
AGTGACCTACTTTACG-1_2	E14.5_2	53634	7905	E14.5_2	38259	7743	1	1
AGTGATATGAGTAGTT-1_2	E14.5_2	62674	8237	E14.5_2	38177	7758	1	1
AGTTAAACACTTGCGA-1_2	E14.5_2	39065	7147	E14.5_2	37999	7139	0	0
AGTTCCTATTTATGTT-1_2	E14.5_2	57117	8164	E14.5_2	38283	7881	2	2
ATAAACGGACCCGTAA-1_2	E14.5_2	70749	8562	E14.5_2	38189	7742	2	2
ATAAAGGCTCGGTCGT-1_2	E14.5_2	18767	5447	E14.5_2	36053	5982	4	4
ATAAGTTACCGCGACG-1_2	E14.5_2	66141	8314	E14.5_2	38177	7703	1	1
ATAATAGCTGTTGAAT-1_2	E14.5_2	66325	8408	E14.5_2	38294	7839	2	2
ATAGACGAAGAGAAAG-1_2	E14.5_2	23280	5916	E14.5_2	36100	6077	12	12
ATAGAGTACTGGGACA-1_2	E14.5_2	24082	5890	E14.5_2	36166	6054	12	12
ATAGTGAAGCGTTCTC-1_2	E14.5_2	50049	7766	E14.5_2	38324	7688	1	1
ATATCTTAGGGCCTTC-1_2	E14.5_2	29481	6715	E14.5_2	36125	6703	5	5
ATATTTAACCCTCAAG-1_2	E14.5_2	31565	6890	E14.5_2	36126	6878	9	9
ATCAATCTGGGCTGCA-1_2	E14.5_2	31298	6661	E14.5_2	36200	6651	5	5
ATCATCCAATATTTGT-1_2	E14.5_2	40199	7512	E14.5_2	38248	7500	10	10
ATCCAGGATTCGTGAA-1_2	E14.5_2	42817	7126	E14.5_2	38346	7111	1	1
ATCCTACCTAAGCTCT-1_2	E14.5_2	56651	7988	E14.5_2	38193	7718	1	1
ATCCTGCGTGGAATGG-1_2	E14.5_2	70699	8452	E14.5_2	38025	7593	13	13
ATCGACCCAATACAGA-1_2	E14.5_2	60316	8286	E14.5_2	38239	7897	2	2
ATCTGTAATTGTACCC-1_2	E14.5_2	35987	7468	E14.5_2	36636	7445	8	8
ATGACGCCGGCTCTAA-1_2	E14.5_2	26738	6491	E14.5_2	35996	6531	8	8
ATGATCGGGAATAGAC-1_2	E14.5_2	42073	8157	E14.5_2	38572	8123	22	22
ATGATGCAATGGTACA-1_2	E14.5_2	61254	8178	E14.5_2	38142	7719	1	1
ATGGAGCAGGCCGTGA-1_2	E14.5_2	31816	6635	E14.5_2	36250	6626	5	5
ATGGATTGACCAAACG-1_2	E14.5_2	33079	6855	E14.5_2	36212	6842	3	3
ATTAAACATGCGGACC-1_2	E14.5_2	54534	8055	E14.5_2	38290	7840	2	2
ATTAATACTACGCGGG-1_2	E14.5_2	27731	6501	E14.5_2	36083	6523	7	7
ATTATGCCATAGGGAG-1_2	E14.5_2	22582	6086	E14.5_2	35886	6297	7	7
ATTCATATACTGTCCA-1_2	E14.5_2	56898	8067	E14.5_2	38250	7795	2	2
CAAACGAGTATCGCAG-1_2	E14.5_2	66954	8240	E14.5_2	37972	7527	13	13
CAAATGTCCTTCCGTG-1_2	E14.5_2	67256	8400	E14.5_2	38149	7735	1	1
CAACGGTTCTTGATAC-1_2	E14.5_2	22376	6123	E14.5_2	35857	6327	19	19
CAATTAAGGGTGATGA-1_2	E14.5_2	18107	5523	E14.5_2	35800	6148	7	7
CAATTTCGTATAAGGG-1_2	E14.5_2	19176	5362	E14.5_2	36077	5855	5	5
CACAATGAGCTGCTAT-1_2	E14.5_2	54249	7915	E14.5_2	38229	7710	1	1
CACAGCACCCACGGCA-1_2	E14.5_2	29173	6846	E14.5_2	36007	6842	9	9
CACATGATTCAGCAAC-1_2	E14.5_2	29523	6585	E14.5_2	36156	6579	5	5
CACTAAAGTTGCCTAT-1_2	E14.5_2	30828	6930	E14.5_2	36093	6914	4	4
CACTCAAGAGCTATGG-1_2	E14.5_2	38078	7336	E14.5_2	37734	7323	10	10
CAGATACTAACATAGT-1_2	E14.5_2	16871	5232	E14.5_2	35720	6004	7	7
CAGCTCACTGAGACAT-1_2	E14.5_2	29153	6859	E14.5_2	35987	6856	3	3
CAGGATATATCGTTGT-1_2	E14.5_2	53035	7973	E14.5_2	38336	7838	2	2
CAGTCTGTATACTGGG-1_2	E14.5_2	41783	7407	E14.5_2	38377	7392	0	0
CAGTTCAAATTGACAC-1_2	E14.5_2	24702	6190	E14.5_2	35979	6300	9	9
CATACTATGTAATTGT-1_2	E14.5_2	27363	6486	E14.5_2	36151	6505	4	4
CATATAGGTACAGTCA-1_2	E14.5_2	53538	7852	E14.5_2	38264	7696	1	1
CATCGGACGGGTTAAT-1_2	E14.5_2	47273	7666	E14.5_2	38365	7624	1	1
CATGGCAGGAAGATCG-1_2	E14.5_2	37184	7558	E14.5_2	37178	7541	8	8
CATGGTCTAGATACCG-1_2	E14.5_2	18198	5507	E14.5_2	35772	6134	7	7
CCAATGTCACAGCAAG-1_2	E14.5_2	39263	7285	E14.5_2	38041	7273	1	1
CCACACTGAGATATTA-1_2	E14.5_2	42915	7490	E14.5_2	38407	7481	1	1
CCAGCCTGGACCAATA-1_2	E14.5_2	25979	6224	E14.5_2	36223	6274	5	5
CCAGGGACGTGGCCTC-1_2	E14.5_2	17032	5194	E14.5_2	35879	5986	15	15
CCATCGCAGTTAAACT-1_2	E14.5_2	67332	8543	E14.5_2	38246	7878	0	0
CCATGCCTGTTTAGTA-1_2	E14.5_2	39924	7854	E14.5_2	38278	7832	4	4
CCCGCAGCGCGAACTA-1_2	E14.5_2	58695	8090	E14.5_2	38213	7746	0	0
CCCGTCAGCGTCTGAC-1_2	E14.5_2	25991	6354	E14.5_2	36005	6421	7	7
CCGCCGGTCAACACAC-1_2	E14.5_2	20672	5696	E14.5_2	35966	6091	8	8
CCGCTATCAGCACCAG-1_2	E14.5_2	58007	8080	E14.5_2	38262	7778	2	2
CCGGCGCATATTGGAT-1_2	E14.5_2	34378	7317	E14.5_2	36292	7296	8	8
CCTACTGCTTACACTT-1_2	E14.5_2	24071	6196	E14.5_2	36013	6348	7	7
CCTGACCACCGATGGT-1_2	E14.5_2	60126	8252	E14.5_2	38249	7862	2	2
CCTGCTATTTGAGAAG-1_2	E14.5_2	16718	5120	E14.5_2	35887	5968	12	12
CCTGTCGCCCGTAAAT-1_2	E14.5_2	33127	6897	E14.5_2	36288	6878	5	5
CGAGACCCTAGAGTGT-1_2	E14.5_2	54936	8047	E14.5_2	38359	7852	2	2
CGATACCTCGCGGACA-1_2	E14.5_2	42012	7337	E14.5_2	38334	7321	1	1
CGATCCGACCCAGTGC-1_2	E14.5_2	46609	7850	E14.5_2	38408	7820	1	1
CGCATTAGCTAATAGG-1_2	E14.5_2	33177	7015	E14.5_2	36178	6998	3	3
CGCTACGGGACATTTA-1_2	E14.5_2	38649	7067	E14.5_2	37888	7056	1	1
CGCTATTCTTAGGCTC-1_2	E14.5_2	31024	6994	E14.5_2	36115	6985	4	4
CGCTGTGACGCCGCAC-1_2	E14.5_2	20497	5667	E14.5_2	35952	6072	7	7
CGGAACGTAAACATAG-1_2	E14.5_2	46524	7358	E14.5_2	38294	7311	13	13
CGGAGCATGGCGATCC-1_2	E14.5_2	20693	5573	E14.5_2	36141	5885	5	5
CGGGAATTTATGTAAA-1_2	E14.5_2	63255	8365	E14.5_2	38255	7872	2	2
CGGGCAGCTAAACCGC-1_2	E14.5_2	33668	7055	E14.5_2	36209	7043	3	3
CGGGCCTTCTTTGTAA-1_2	E14.5_2	53898	7833	E14.5_2	38276	7653	1	1
CGTATTAAGAGATCTA-1_2	E14.5_2	32519	7080	E14.5_2	36124	7062	9	9
CGTCACGTCCATTGGT-1_2	E14.5_2	67884	8302	E14.5_2	38042	7555	13	13
CGTGAAGTTAATTCAC-1_2	E14.5_2	38034	7099	E14.5_2	37694	7090	1	1
CTAAAGGGAAATAGGA-1_2	E14.5_2	63981	8443	E14.5_2	38263	7922	2	2
CTACGCACGGAGTACC-1_2	E14.5_2	31264	7003	E14.5_2	36061	6990	4	4
CTAGCATAGTATAATG-1_2	E14.5_2	29088	6320	E14.5_2	36241	6315	5	5
CTAGTTGGGCCCGGTA-1_2	E14.5_2	19048	5606	E14.5_2	35879	6096	7	7
CTCGAGGTCGAACAGT-1_2	E14.5_2	18765	5491	E14.5_2	35978	6036	15	15
CTCGCACCTATATAGT-1_2	E14.5_2	24826	6376	E14.5_2	35985	6469	7	7
CTCTATTTGGCTGCAG-1_2	E14.5_2	54935	7993	E14.5_2	38257	7779	0	0
CTGAATCCGAGACCTC-1_2	E14.5_2	79315	8784	E14.5_2	38098	7661	13	13
CTGCCATGCATCACAT-1_2	E14.5_2	40131	7487	E14.5_2	38223	7475	0	0
CTGGAAATGGATGCTT-1_2	E14.5_2	31047	6846	E14.5_2	36097	6837	3	3
CTGTACTTCTTAGCAT-1_2	E14.5_2	38450	7479	E14.5_2	37852	7462	10	10
CTGTTACCCAATCTAG-1_2	E14.5_2	66032	8424	E14.5_2	38196	7845	2	2
CTTCATAGCTCAAGAA-1_2	E14.5_2	27448	6737	E14.5_2	35932	6740	19	19
CTTCGTAGATAGGTGA-1_2	E14.5_2	35078	6797	E14.5_2	36547	6783	10	10
CTTGCCCAGGCTCTAC-1_2	E14.5_2	60448	8184	E14.5_2	38164	7760	2	2
CTTGTACTTGTTGACT-1_2	E14.5_2	20039	5755	E14.5_2	35940	6180	7	7
CTTGTCAACATTCGAG-1_2	E14.5_2	61583	8265	E14.5_2	38129	7810	0	0
CTTTAACTTTCAAAGG-1_2	E14.5_2	26027	6412	E14.5_2	35995	6477	7	7
CTTTAGTGCTATTATT-1_2	E14.5_2	58837	8206	E14.5_2	38224	7890	2	2
GAAACCGAATTACCTT-1_2	E14.5_2	69075	8411	E14.5_2	38125	7640	1	1
GAAATGGCGGTGTTAG-1_2	E14.5_2	37545	7273	E14.5_2	37484	7260	3	3
GAAATTGTCTCTATAA-1_2	E14.5_2	58432	8145	E14.5_2	38167	7799	1	1
GAAGTGATTTATCGTG-1_2	E14.5_2	48408	7506	E14.5_2	38304	7459	1	1
GAATCTGAACATTCTC-1_2	E14.5_2	59836	8377	E14.5_2	38319	8013	2	2
GAATTCACCCGGGTGT-1_2	E14.5_2	68265	8439	E14.5_2	38165	7738	2	2
GACACTGAGTTCAGTG-1_2	E14.5_2	57625	7967	E14.5_2	38085	7618	13	13
GACCGTGCTGACGGTG-1_2	E14.5_2	46557	7783	E14.5_2	38439	7751	1	1
GACTAAGATCATGCAC-1_2	E14.5_2	18577	5570	E14.5_2	35788	6148	7	7
GAGACTGATGGGTAGA-1_2	E14.5_2	17900	5267	E14.5_2	35954	5947	3	3
GAGATCTGCTTGGCAT-1_2	E14.5_2	30303	6663	E14.5_2	36140	6645	12	12
GAGCGAGGGAGTACCG-1_2	E14.5_2	23238	6048	E14.5_2	35953	6261	8	8
GAGTCCGCTTACCGGA-1_2	E14.5_2	60589	8173	E14.5_2	38208	7758	2	2
GATACGATGGGAGTCA-1_2	E14.5_2	51275	7651	E14.5_2	38181	7499	13	13
GATAGGTAACGTTGAC-1_2	E14.5_2	64950	8387	E14.5_2	38279	7879	2	2
GATCATTCCAAACATT-1_2	E14.5_2	36899	7235	E14.5_2	37033	7216	3	3
GATCGCGGGCTCTCCA-1_2	E14.5_2	28904	6911	E14.5_2	35932	6909	4	4
GATGCGTCCTGCATTC-1_2	E14.5_2	38999	7627	E14.5_2	38066	7618	4	4
GATGTTCAATCCACGA-1_2	E14.5_2	37911	7093	E14.5_2	37630	7076	0	0
GCAGATTAGGGATATC-1_2	E14.5_2	32047	6971	E14.5_2	36191	6956	5	5
GCATAGAGCACTCAGG-1_2	E14.5_2	33734	7246	E14.5_2	36258	7236	4	4
GCCCGCGCGTTTGACA-1_2	E14.5_2	18807	5564	E14.5_2	35892	6105	19	19
GCCGAAATTCCTACGT-1_2	E14.5_2	33654	7090	E14.5_2	36272	7072	12	12
GCCGATTGGCCAAGCT-1_2	E14.5_2	51324	7948	E14.5_2	38402	7859	2	2
GCCGGGTTAGGGTCGC-1_2	E14.5_2	52686	7908	E14.5_2	38318	7778	1	1
GCGACGATAGTTGTAC-1_2	E14.5_2	63381	8345	E14.5_2	38122	7841	13	13
GCGAGGCCCGAGCAGA-1_2	E14.5_2	31228	6573	E14.5_2	36231	6557	0	0
GCGAGTTCTGCAAAGA-1_2	E14.5_2	14792	4665	E14.5_2	35870	5787	5	5
GCGCCGTTCCACGATA-1_2	E14.5_2	39632	7302	E14.5_2	38110	7287	0	0
GCGCTATGCCGAGGCA-1_2	E14.5_2	54764	7922	E14.5_2	38206	7721	1	1
GCGGTTCCCTATCATG-1_2	E14.5_2	72292	8484	E14.5_2	37992	7544	13	13
GCTAGTTTCATTGAGG-1_2	E14.5_2	11262	4205	E14.5_2	35185	6070	19	19
GCTCTCGGGTACCGAA-1_2	E14.5_2	29760	6487	E14.5_2	36099	6473	3	3
GCTGAGGCGTGAGTAT-1_2	E14.5_2	23321	5850	E14.5_2	36164	5988	0	0
GGAGACGACACCTTTG-1_2	E14.5_2	45912	7728	E14.5_2	38427	7711	0	0
GGAGTGCCGCCCTGGA-1_2	E14.5_2	16649	5392	E14.5_2	35306	6215	19	19
GGCAAATTACTTTACT-1_2	E14.5_2	50567	7736	E14.5_2	38307	7646	1	1
GGCAAGGCGAAATAGC-1_2	E14.5_2	31089	6628	E14.5_2	36213	6618	0	0
GGCACTCCACTGGGCA-1_2	E14.5_2	24159	5954	E14.5_2	36228	6059	12	12
GGCGCATGAATTGATG-1_2	E14.5_2	52983	7863	E14.5_2	38224	7705	1	1
GGCGCGTTCGAGTTTA-1_2	E14.5_2	62108	8083	E14.5_2	38199	7661	2	2
GGCGGAGTAATATTAG-1_2	E14.5_2	16130	4973	E14.5_2	35862	5901	12	12
GGCTCGTGCCACCAGC-1_2	E14.5_2	27993	6840	E14.5_2	35943	6844	19	19
GGGAGGATGCCCGAAA-1_2	E14.5_2	29819	6734	E14.5_2	36135	6729	4	4
GGGCCCGTCTTAAACA-1_2	E14.5_2	58967	8103	E14.5_2	38158	7778	1	1
GGGCGATATGTGTGAA-1_2	E14.5_2	34128	7048	E14.5_2	36318	7035	3	3
GGGCGTCACCACGTAA-1_2	E14.5_2	54557	7878	E14.5_2	38120	7628	13	13
GGGCTGGTTAGTCGCG-1_2	E14.5_2	26925	6431	E14.5_2	36102	6473	9	9
GGGTCACCGTGACGGT-1_2	E14.5_2	24961	6236	E14.5_2	36073	6333	12	12
GGGTGACACCTTAACT-1_2	E14.5_2	63396	8251	E14.5_2	38156	7764	2	2
GGTACAAACATGCTAT-1_2	E14.5_2	52178	8016	E14.5_2	38384	7890	1	1
GGTATTGCCGAGTTTA-1_2	E14.5_2	25069	6197	E14.5_2	36060	6287	9	9
GGTCAGTGGGTCCCAC-1_2	E14.5_2	72695	8639	E14.5_2	38285	7835	2	2
GGTGCTGGTACACATT-1_2	E14.5_2	46712	7462	E14.5_2	38360	7427	1	1
GTACACTTACCTGAAG-1_2	E14.5_2	19230	5401	E14.5_2	36053	5866	5	5
GTACGTTTGCCCGTCA-1_2	E14.5_2	47667	7711	E14.5_2	38363	7674	0	0
GTACTAAGATTTGGAG-1_2	E14.5_2	33820	6974	E14.5_2	36300	6960	3	3
GTAGCGGCTATACACT-1_2	E14.5_2	35683	6877	E14.5_2	36649	6863	5	5
GTATCTTTCATAACCA-1_2	E14.5_2	59390	8229	E14.5_2	38186	7840	2	2
GTCATTAGAGCGAACG-1_2	E14.5_2	26245	6128	E14.5_2	36200	6174	5	5
GTCCGGCTGAATTGCG-1_2	E14.5_2	26829	6453	E14.5_2	36028	6491	9	9
GTCGTACCATCTCGGG-1_2	E14.5_2	50765	7783	E14.5_2	38307	7676	2	2
GTCTGGGCGGTCGAGA-1_2	E14.5_2	51799	7710	E14.5_2	38160	7544	13	13
GTGACTTCAGTAGTGC-1_2	E14.5_2	74686	8591	E14.5_2	38037	7618	1	1
GTGATCATAGATCTGC-1_2	E14.5_2	57559	8124	E14.5_2	38231	7851	2	2
GTGCCGCTTCAAAGGT-1_2	E14.5_2	49658	7657	E14.5_2	38249	7568	13	13
GTGCGAAATCGAACAC-1_2	E14.5_2	43473	7180	E14.5_2	38307	7170	13	13
GTGCTCAAGTACTGTC-1_2	E14.5_2	30096	6845	E14.5_2	36082	6840	9	9
GTTACCTACAACTTGC-1_2	E14.5_2	60308	8259	E14.5_2	38214	7906	2	2
GTTACTTTGGGCCTAG-1_2	E14.5_2	53074	7907	E14.5_2	38220	7751	1	1
GTTATATTATCTCCCT-1_2	E14.5_2	73312	8691	E14.5_2	38172	7817	2	2
GTTCCAGTCTGACCAT-1_2	E14.5_2	41044	7604	E14.5_2	38413	7591	8	8
GTTCGCCATAAGTGCC-1_2	E14.5_2	35597	7567	E14.5_2	36516	7550	4	4
GTTGCACGGAGTTTCG-1_2	E14.5_2	16272	5152	E14.5_2	35803	6034	7	7
GTTGGATTTGCGTTGG-1_2	E14.5_2	29680	6747	E14.5_2	36138	6742	10	10
GTTTACGTTCCATCTG-1_2	E14.5_2	70181	8607	E14.5_2	38270	7907	2	2
GTTTCCTGGAGGGTGA-1_2	E14.5_2	21485	5990	E14.5_2	35948	6265	7	7
GTTTGACCAAATCCTA-1_2	E14.5_2	35702	7436	E14.5_2	36554	7417	9	9
GTTTGGGCTTGTGAGC-1_2	E14.5_2	51774	7927	E14.5_2	38336	7807	0	0
TAACATACAATGTGGG-1_2	E14.5_2	30984	6482	E14.5_2	36193	6471	5	5
TAACTCATCCGCGCGG-1_2	E14.5_2	65345	8284	E14.5_2	38110	7680	1	1
TAATACACAGTAGTAT-1_2	E14.5_2	8652	3423	E14.5_2	35407	6192	7	7
TACAACGCACAACTCA-1_2	E14.5_2	51824	7823	E14.5_2	38264	7672	1	1
TACATAGGCATACACC-1_2	E14.5_2	42789	7540	E14.5_2	38421	7525	1	1
TACATTTCTAACGTGC-1_2	E14.5_2	44378	7751	E14.5_2	38455	7729	10	10
TACCGGCTCACTGCCC-1_2	E14.5_2	65527	8377	E14.5_2	38204	7765	2	2
TACCTCACGCTTGTAC-1_2	E14.5_2	43514	8201	E14.5_2	38661	8159	22	22
TACGAACACGACTTCA-1_2	E14.5_2	33587	7016	E14.5_2	36243	7007	3	3
TACGACGCTTGCTGCG-1_2	E14.5_2	68165	8404	E14.5_2	38170	7699	2	2
TACGACTGCCTCTTAG-1_2	E14.5_2	53225	7986	E14.5_2	38317	7834	2	2
TACGCAGTTCTTTCCT-1_2	E14.5_2	48325	7688	E14.5_2	38328	7646	1	1
TACGCCATATTCTAAT-1_2	E14.5_2	45092	7766	E14.5_2	38448	7744	1	1
TAGAGCTACGAAGAAC-1_2	E14.5_2	19599	5667	E14.5_2	35969	6130	8	8
TAGAGTCTAAGCGAAC-1_2	E14.5_2	19731	5522	E14.5_2	35974	5969	15	15
TAGCGTTGGGTCTTAC-1_2	E14.5_2	22213	5761	E14.5_2	36088	5969	5	5
TAGCTAAGTCCGGGAG-1_2	E14.5_2	31975	6875	E14.5_2	36147	6864	3	3
TAGCTCGCCTGATAAC-1_2	E14.5_2	39602	7249	E14.5_2	38089	7234	0	0
TAGGGTGTTTCAAGAG-1_2	E14.5_2	19189	5693	E14.5_2	35840	6166	7	7
TAGGTTCGAGTTCGTC-1_2	E14.5_2	28374	6272	E14.5_2	36214	6274	5	5
TAGTCCGCAGAGAATG-1_2	E14.5_2	40523	7604	E14.5_2	38310	7592	4	4
TAGTGCCCTCCAGAGT-1_2	E14.5_2	21848	5886	E14.5_2	36019	6173	9	9
TAGTTTATTCTTGCTT-1_2	E14.5_2	12140	4192	E14.5_2	35593	5926	8	8
TATACACAGACGCCTT-1_2	E14.5_2	57850	8168	E14.5_2	38203	7841	0	0
TATACACGCAAAGTAT-1_2	E14.5_2	30348	6965	E14.5_2	36025	6949	19	19
TATCCTGCATGGGAAT-1_2	E14.5_2	26512	6612	E14.5_2	35949	6669	8	8
TATCGATGATTAAACG-1_2	E14.5_2	24530	6183	E14.5_2	35994	6294	7	7
TATCTACCACAGCGGG-1_2	E14.5_2	50446	7863	E14.5_2	38339	7777	2	2
TATGCTCCCTACTTAC-1_2	E14.5_2	15498	4990	E14.5_2	35753	5975	15	15
TATGGGACCGAGCAGG-1_2	E14.5_2	32220	7190	E14.5_2	36080	7173	4	4
TATGGGTACGTATCGT-1_2	E14.5_2	31936	6927	E14.5_2	36108	6916	3	3
TATGGTCTGAGTAACA-1_2	E14.5_2	38258	7640	E14.5_2	37808	7625	4	4
TATTCCACTCAGCTCG-1_2	E14.5_2	45764	7584	E14.5_2	38389	7564	0	0
TATTCGTGCCAGAATA-1_2	E14.5_2	29896	6391	E14.5_2	36171	6383	5	5
TCAACCATGTTCGGGC-1_2	E14.5_2	20983	5857	E14.5_2	35834	6186	7	7
TCAACGAGGAGACAAA-1_2	E14.5_2	55549	8071	E14.5_2	38260	7858	1	1
TCACAGGTTATTGGGC-1_2	E14.5_2	17434	5123	E14.5_2	36118	5849	12	12
TCACCCTCTTAAGATT-1_2	E14.5_2	59771	8206	E14.5_2	38193	7835	2	2
TCACGTGCCCGATTCA-1_2	E14.5_2	34444	6934	E14.5_2	36432	6922	5	5
TCAGTAGGGACTATAA-1_2	E14.5_2	67997	8336	E14.5_2	38073	7598	13	13
TCCAGGCGAGTACGGT-1_2	E14.5_2	30624	6933	E14.5_2	36052	6923	9	9
TCCCAGGCTTAGCTAA-1_2	E14.5_2	15971	4732	E14.5_2	36080	5803	12	12
TCCGCTTATCCCATTA-1_2	E14.5_2	70549	8651	E14.5_2	38225	7897	0	0
TCGAGACCAACACCGT-1_2	E14.5_2	31517	7212	E14.5_2	36029	7191	4	4
TCTACCGTCCACAAGC-1_2	E14.5_2	22603	6213	E14.5_2	35881	6426	7	7
TCTAGCATGCCCAGAA-1_2	E14.5_2	64895	8357	E14.5_2	38237	7808	2	2
TCTATCATGCAGTTAC-1_2	E14.5_2	10420	3912	E14.5_2	35360	6108	19	19
TCTTCGAATAGACGTT-1_2	E14.5_2	30458	6389	E14.5_2	36247	6381	5	5
TCTTGGTAACACCAAA-1_2	E14.5_2	20488	5588	E14.5_2	36022	6004	15	15
TGACCCACGTTAGACA-1_2	E14.5_2	19931	5379	E14.5_2	36197	5836	12	12
TGACTATAATCCTTTC-1_2	E14.5_2	54137	7970	E14.5_2	38286	7798	2	2
TGAGAATGCTTTACCG-1_2	E14.5_2	45023	8007	E14.5_2	38605	7976	8	8
TGAGTAAATTAGCGTA-1_2	E14.5_2	63873	8331	E14.5_2	38197	7819	2	2
TGATCGGTTTGACCCT-1_2	E14.5_2	28853	6489	E14.5_2	36102	6497	3	3
TGATCTCCGGCGCCAG-1_2	E14.5_2	27978	6656	E14.5_2	36020	6669	7	7
TGCAAGAATGACGTAA-1_2	E14.5_2	24232	6298	E14.5_2	35970	6427	9	9
TGCAGAGTACCGAGCA-1_2	E14.5_2	34898	6844	E14.5_2	36508	6835	0	0
TGCGACACCCTAGTGC-1_2	E14.5_2	55532	7778	E14.5_2	38122	7498	13	13
TGCGTAAGAACCTGAT-1_2	E14.5_2	46019	7514	E14.5_2	38334	7476	0	0
TGCTGTTGAAGAACTC-1_2	E14.5_2	34022	6776	E14.5_2	36388	6766	5	5
TGGCAGATTACGATCA-1_2	E14.5_2	48104	7702	E14.5_2	38369	7667	2	2
TGGCAGCAGTAATAGT-1_2	E14.5_2	30026	6811	E14.5_2	36092	6804	4	4
TGTACGAACAAATCCG-1_2	E14.5_2	45919	7998	E14.5_2	38515	7975	10	10
TGTTCGTATTGCGGTG-1_2	E14.5_2	65155	8329	E14.5_2	38167	7757	2	2
TGTTTCGGTACTTCTC-1_2	E14.5_2	44777	8158	E14.5_2	38625	8132	8	8
TTAACCAACCCTCCCT-1_2	E14.5_2	37462	7468	E14.5_2	37429	7449	8	8
TTACAACTACGCATCC-1_2	E14.5_2	21911	5942	E14.5_2	35907	6201	7	7
TTACTGGGATATTTCA-1_2	E14.5_2	59988	8235	E14.5_2	38216	7831	1	1
TTATGAATGAAAGGGA-1_2	E14.5_2	55842	8237	E14.5_2	38350	8020	2	2
TTCACGAAAGGATCAC-1_2	E14.5_2	36468	7588	E14.5_2	36805	7572	4	4
TTCCGCGTGAGGCGAT-1_2	E14.5_2	62315	8364	E14.5_2	38261	7935	2	2
TTGCACAATTCAGAAA-1_2	E14.5_2	59571	8192	E14.5_2	38215	7833	1	1
TTGGATATCGTCTACG-1_2	E14.5_2	64924	8366	E14.5_2	38098	7765	13	13
TTGGATTGGGTACCAC-1_2	E14.5_2	46750	8404	E14.5_2	38721	8342	22	22
TTGTAATCCGTACTCG-1_2	E14.5_2	36301	7555	E14.5_2	36749	7532	4	4

## Sheet: Visium_E17.5_metadata
	orig.ident	nCount_Spatial	nFeature_Spatial	slice	nCount_SCT	nFeature_SCT	SCT_snn_res.1	seurat_clusters
AAACAATCTACTAGCA-1_1	E17.5_1	19168	5282	E17.5_1	42244	6244	8	8
AAACTGCTGGCTCCAA-1_1	E17.5_1	66036	8334	E17.5_1	44020	8085	28	28
AAAGACCCAAGTCGCG-1_1	E17.5_1	26295	6195	E17.5_1	41969	6438	25	25
AAAGGCTCTCGCGCCG-1_1	E17.5_1	31755	6207	E17.5_1	42923	6231	0	0
AAAGTCACTGATGTAA-1_1	E17.5_1	23446	5939	E17.5_1	41931	6395	25	25
AAATACCTATAAGCAT-1_1	E17.5_1	61085	8142	E17.5_1	44172	8040	13	13
AAATCGTGTACCACAA-1_1	E17.5_1	60390	7967	E17.5_1	44038	7846	11	11
AAATGGTCAATGTGCC-1_1	E17.5_1	41522	7474	E17.5_1	42813	7470	12	12
AAATGTGGGTGCTCCT-1_1	E17.5_1	32458	6958	E17.5_1	41970	7001	27	27
AAATTAACGGGTAGCT-1_1	E17.5_1	68441	8465	E17.5_1	43940	8130	21	21
AACAACTGGTAGTTGC-1_1	E17.5_1	31872	6515	E17.5_1	42728	6537	6	6
AACAGGATGGGCCGCG-1_1	E17.5_1	56151	7754	E17.5_1	44258	7711	4	4
AACCCAGAGACGGAGA-1_1	E17.5_1	9062	3505	E17.5_1	42661	6789	9	9
AACCTTTAAATACGGT-1_1	E17.5_1	27175	5951	E17.5_1	43050	6102	0	0
AACGATAATGCCGTAG-1_1	E17.5_1	23175	5679	E17.5_1	43068	6056	0	0
AACGGCCATCTCCGGT-1_1	E17.5_1	42782	6937	E17.5_1	43195	6935	7	7
AACGTACTGTGGGTAC-1_1	E17.5_1	47896	7274	E17.5_1	44393	7272	7	7
AACGTCAGACTAGTGG-1_1	E17.5_1	45896	7494	E17.5_1	44263	7485	4	4
AACTAGCGTATCGCAC-1_1	E17.5_1	44262	8125	E17.5_1	43921	8110	10	10
AACTAGGCTTGGGTGT-1_1	E17.5_1	24739	5719	E17.5_1	43223	5977	0	0
AACTCAAGTTAATTGC-1_1	E17.5_1	79991	8670	E17.5_1	43466	7746	14	14
AACTGATATTAGGCCT-1_1	E17.5_1	9144	3629	E17.5_1	41847	6898	9	9
AACTGGTGTGGGCCTT-1_1	E17.5_1	40998	7931	E17.5_1	42533	7918	10	10
AACTTTAGCTGCTGAG-1_1	E17.5_1	45152	7997	E17.5_1	44214	7965	10	10
AAGACTGCAAGCTACT-1_1	E17.5_1	64112	8208	E17.5_1	44031	8021	21	21
AAGCATACTCTCCTGA-1_1	E17.5_1	23857	5493	E17.5_1	43327	5814	0	0
AAGCTAGATCGAGTAA-1_1	E17.5_1	41452	7191	E17.5_1	42835	7188	13	13
AAGGAGAACTTATAAG-1_1	E17.5_1	30542	6782	E17.5_1	42108	6845	10	10
AAGGAGCGGTTGGTGC-1_1	E17.5_1	23329	5791	E17.5_1	42807	6197	12	12
AAGGCGCGTAAAGCTT-1_1	E17.5_1	37925	7061	E17.5_1	42553	7059	2	2
AAGTAGAAGACCGGGT-1_1	E17.5_1	26410	6162	E17.5_1	42694	6338	8	8
AAGTAGTGACGCGAGG-1_1	E17.5_1	49602	7504	E17.5_1	44489	7499	4	4
AATAACAACGCTCGGC-1_1	E17.5_1	77477	8652	E17.5_1	43631	7836	4	4
AATAAGTCCTCGAGAC-1_1	E17.5_1	76364	8999	E17.5_1	44863	8224	8	8
AATAGAACAGAGTGGC-1_1	E17.5_1	52811	7547	E17.5_1	44389	7535	7	7
AATCCAAGGGCCTGAG-1_1	E17.5_1	31499	6889	E17.5_1	42227	6932	10	10
AATGACTGTCAGCCGG-1_1	E17.5_1	41424	7341	E17.5_1	42801	7335	18	18
AATTAAAGGTCGGCGT-1_1	E17.5_1	60941	8189	E17.5_1	44164	8088	21	21
AATTAGCGCTGCAGCG-1_1	E17.5_1	44082	7288	E17.5_1	43809	7285	0	0
AATTCTAGAGTTAGGC-1_1	E17.5_1	51511	7681	E17.5_1	44546	7673	13	13
ACAAGGAAATCCGCCC-1_1	E17.5_1	39961	6945	E17.5_1	42701	6943	0	0
ACAAGGACAAGAGGTT-1_1	E17.5_1	48546	7422	E17.5_1	44438	7415	4	4
ACAAGGGCAGGCTCTG-1_1	E17.5_1	55837	7789	E17.5_1	44234	7749	0	0
ACAATCCATTTAAACC-1_1	E17.5_1	52210	7618	E17.5_1	44434	7612	4	4
ACACAAAGACGGGTGG-1_1	E17.5_1	34673	7095	E17.5_1	42262	7095	16	16
ACACCCAGCATGCAGC-1_1	E17.5_1	30432	6545	E17.5_1	42537	6610	12	12
ACACCTTAAGTAGGGC-1_1	E17.5_1	51105	7687	E17.5_1	44571	7680	30	30
ACACGGCACTATGCAT-1_1	E17.5_1	37420	7367	E17.5_1	42210	7358	16	16
ACACGGGAACTTAGGG-1_1	E17.5_1	56117	7894	E17.5_1	44332	7858	15	15
ACACTGATCAAGGTGT-1_1	E17.5_1	48521	7579	E17.5_1	44497	7573	0	0
ACATAATAAGGCGGTG-1_1	E17.5_1	42631	7269	E17.5_1	43091	7259	8	8
ACATCCCGGCCATACG-1_1	E17.5_1	28241	6029	E17.5_1	42986	6129	0	0
ACATCGATCGTTTACC-1_1	E17.5_1	56821	8068	E17.5_1	44360	8035	13	13
ACATCGGTCAGCCGCG-1_1	E17.5_1	40913	6788	E17.5_1	42841	6788	7	7
ACATTAGTTTATATCC-1_1	E17.5_1	35703	6700	E17.5_1	42569	6698	0	0
ACCAACGCTTATTTAT-1_1	E17.5_1	42092	7209	E17.5_1	42961	7208	0	0
ACCAAGAACGCGTGTC-1_1	E17.5_1	27260	6317	E17.5_1	42577	6475	8	8
ACCACAAGTTTCTATC-1_1	E17.5_1	10442	3904	E17.5_1	42115	6693	12	12
ACCACGTGCAGCTATA-1_1	E17.5_1	40543	6934	E17.5_1	42755	6931	0	0
ACCAGCCCGGTCTTTG-1_1	E17.5_1	39516	7476	E17.5_1	42390	7467	16	16
ACCAGGAGTGTGATCT-1_1	E17.5_1	39554	7986	E17.5_1	42240	7974	10	10
ACCATATCCGCAATAA-1_1	E17.5_1	72478	8618	E17.5_1	43930	8102	11	11
ACCATCGTATATGGTA-1_1	E17.5_1	52918	7837	E17.5_1	44408	7822	3	3
ACCCATCTTGAGGGTA-1_1	E17.5_1	37082	6779	E17.5_1	42644	6776	18	18
ACCCGGAAACTCCCAG-1_1	E17.5_1	35023	6515	E17.5_1	42736	6515	0	0
ACCCGGTTACACTTCC-1_1	E17.5_1	44005	7484	E17.5_1	43772	7479	18	18
ACCGAAAGGGCCCTGC-1_1	E17.5_1	41741	7811	E17.5_1	42743	7805	10	10
ACCGACTGAGTCCCAC-1_1	E17.5_1	37379	6858	E17.5_1	42577	6852	15	15
ACCTAATCGACTTCCT-1_1	E17.5_1	47763	7330	E17.5_1	44405	7327	4	4
ACGATGCATATGTTAT-1_1	E17.5_1	72528	8289	E17.5_1	43570	7652	14	14
ACGCATTCGTGAGTAC-1_1	E17.5_1	53893	8057	E17.5_1	44494	8045	18	18
ACGCCCAGCTGTCGAT-1_1	E17.5_1	38820	7186	E17.5_1	42391	7182	16	16
ACGCCGCTAGACGACC-1_1	E17.5_1	53105	7786	E17.5_1	44488	7777	24	24
ACGCGAAGTCAGACGA-1_1	E17.5_1	48080	7508	E17.5_1	44443	7505	11	11
ACGCGGGCCAAGGACA-1_1	E17.5_1	48901	7559	E17.5_1	44476	7555	14	14
ACGGCACTTGCTTGGG-1_1	E17.5_1	28525	6097	E17.5_1	42967	6197	11	11
ACGGCCAACATGGACT-1_1	E17.5_1	40366	6835	E17.5_1	42748	6832	23	23
ACGGCGACGATGGGAA-1_1	E17.5_1	40095	6779	E17.5_1	42764	6777	0	0
ACGTTAATGTCGAAGA-1_1	E17.5_1	56860	8026	E17.5_1	44307	7988	0	0
ACGTTAGATTTGCCCG-1_1	E17.5_1	49015	7389	E17.5_1	44444	7383	14	14
ACGTTCCGCGCTCCGT-1_1	E17.5_1	22796	5764	E17.5_1	41812	6283	25	25
ACTACCAGCTCTCTGG-1_1	E17.5_1	39560	7313	E17.5_1	42525	7305	4	4
ACTCAATAAAGGCACG-1_1	E17.5_1	44107	7176	E17.5_1	43789	7171	15	15
ACTCAGACCTGCTTCT-1_1	E17.5_1	15630	4820	E17.5_1	42520	6347	8	8
ACTCCCTAGAATAGTA-1_1	E17.5_1	45415	7344	E17.5_1	44169	7341	13	13
ACTGATTTAGTGATTC-1_1	E17.5_1	12384	3532	E17.5_1	42122	6265	29	29
ACTGTACGATACACAT-1_1	E17.5_1	59232	8037	E17.5_1	44182	7955	15	15
ACTGTAGCACTTTGGA-1_1	E17.5_1	41028	7040	E17.5_1	42784	7037	4	4
ACTGTCCAGGATTATA-1_1	E17.5_1	44861	7824	E17.5_1	44113	7817	18	18
ACTGTCTTCTTTAGAA-1_1	E17.5_1	68351	8643	E17.5_1	44088	8316	2	2
ACTTATTAGGATCGGT-1_1	E17.5_1	56726	7756	E17.5_1	44209	7707	11	11
ACTTCGCCATACGCAC-1_1	E17.5_1	49529	7603	E17.5_1	44496	7597	2	2
ACTTGACTCCCTCTTT-1_1	E17.5_1	51911	7664	E17.5_1	44487	7657	11	11
ACTTGCCATATTGTAC-1_1	E17.5_1	27720	6407	E17.5_1	41957	6579	25	25
ACTTGGGACCCGGTGG-1_1	E17.5_1	29203	6466	E17.5_1	42677	6523	12	12
ACTTTCCTATAGCTTC-1_1	E17.5_1	62291	8262	E17.5_1	44061	8128	2	2
AGAACGTGGTACATTC-1_1	E17.5_1	79590	8676	E17.5_1	43744	7785	15	15
AGAAGGTTGCCGAATT-1_1	E17.5_1	60467	8018	E17.5_1	44129	7933	3	3
AGACATAGATCCTTCC-1_1	E17.5_1	31682	7096	E17.5_1	42026	7133	25	25
AGACCCACCGCTGATC-1_1	E17.5_1	51417	7620	E17.5_1	44494	7617	13	13
AGACCCGCCCTCCTCG-1_1	E17.5_1	30611	6476	E17.5_1	42498	6523	12	12
AGACTAGCCTTCCAGA-1_1	E17.5_1	45345	7599	E17.5_1	44221	7596	4	4
AGAGGTATCTCGGTCC-1_1	E17.5_1	11323	4128	E17.5_1	41551	6805	27	27
AGATACCGGTGTTCAC-1_1	E17.5_1	52495	7527	E17.5_1	44383	7515	7	7
AGATCTCAGGTGTGAT-1_1	E17.5_1	63991	8160	E17.5_1	43965	7968	15	15
AGATGACTCGCCCACG-1_1	E17.5_1	14634	4577	E17.5_1	42822	6317	12	12
AGATTATAGGACGTTT-1_1	E17.5_1	64251	8208	E17.5_1	44014	8018	14	14
AGCACCAGTACTCACG-1_1	E17.5_1	41976	7191	E17.5_1	42939	7187	15	15
AGCAGCCAGATGAATA-1_1	E17.5_1	21787	5451	E17.5_1	43343	5970	17	17
AGCATCGTCGATAATT-1_1	E17.5_1	18582	5132	E17.5_1	42915	6170	12	12
AGCGACATCCCATTCA-1_1	E17.5_1	16928	4893	E17.5_1	42660	6209	12	12
AGCGACCAACGATATT-1_1	E17.5_1	33419	6900	E17.5_1	42321	6910	5	5
AGCGTGGTATTCTACT-1_1	E17.5_1	48851	7535	E17.5_1	44497	7535	13	13
AGCTCTTTACTCAGTT-1_1	E17.5_1	49535	7367	E17.5_1	44449	7365	3	3
AGCTTATAGAGACCTG-1_1	E17.5_1	40617	7861	E17.5_1	42435	7849	10	10
AGGACGACCCATTAGA-1_1	E17.5_1	55820	7744	E17.5_1	44218	7699	3	3
AGGATAAAGTCGGGAT-1_1	E17.5_1	31001	6216	E17.5_1	42856	6244	0	0
AGGCCACCCGTTATGA-1_1	E17.5_1	38900	7030	E17.5_1	42557	7028	4	4
AGGCTTCCCGAAGAAG-1_1	E17.5_1	43723	7179	E17.5_1	43658	7172	17	17
AGGGACAGCACGGCGG-1_1	E17.5_1	20140	5377	E17.5_1	41722	6202	25	25
AGGGACTCTACGCGAC-1_1	E17.5_1	27753	6036	E17.5_1	43078	6160	0	0
AGGGCGTGATCGGCTA-1_1	E17.5_1	29093	6578	E17.5_1	42614	6691	22	22
AGGGCTGCAGTTACAG-1_1	E17.5_1	63328	8244	E17.5_1	44067	8096	21	21
AGGTAACCTCCTATTC-1_1	E17.5_1	35798	7286	E17.5_1	42293	7280	22	22
AGGTAGGTACAAAGCT-1_1	E17.5_1	59397	7947	E17.5_1	44154	7865	4	4
AGGTTTCACACACCTT-1_1	E17.5_1	48409	7681	E17.5_1	44519	7679	13	13
AGTAATGTCTTGCCGC-1_1	E17.5_1	26806	6199	E17.5_1	42560	6398	5	5
AGTAGCGTGAACGAAC-1_1	E17.5_1	39197	7410	E17.5_1	42368	7406	16	16
AGTAGGTAACATACAT-1_1	E17.5_1	39402	7757	E17.5_1	42315	7753	10	10
AGTATAATACTAGGCA-1_1	E17.5_1	29858	6319	E17.5_1	42820	6377	2	2
AGTCAACACCACCATC-1_1	E17.5_1	53218	7779	E17.5_1	44430	7770	3	3
AGTCGGCCCAAACGAC-1_1	E17.5_1	36384	6824	E17.5_1	42603	6821	4	4
AGTGACCTACTTTACG-1_1	E17.5_1	51454	7609	E17.5_1	44501	7605	11	11
AGTGATATGAGTAGTT-1_1	E17.5_1	48992	8032	E17.5_1	44674	8025	3	3
AGTGCGTAGCTCGTAA-1_1	E17.5_1	54638	7712	E17.5_1	44330	7698	7	7
AGTTAAACACTTGCGA-1_1	E17.5_1	62898	8114	E17.5_1	43853	7928	3	3
AGTTCCTACAGAATTA-1_1	E17.5_1	28190	6331	E17.5_1	42559	6442	12	12
AGTTCCTATTTATGTT-1_1	E17.5_1	52393	8067	E17.5_1	44584	8057	28	28
ATAAACCATTGGACGG-1_1	E17.5_1	13206	4521	E17.5_1	41976	6653	8	8
ATAAACGGACCCGTAA-1_1	E17.5_1	69205	8603	E17.5_1	44065	8222	13	13
ATAAAGGCTCGGTCGT-1_1	E17.5_1	65138	8305	E17.5_1	44019	8076	21	21
ATAAGGTGGAGAACAT-1_1	E17.5_1	39909	7072	E17.5_1	42650	7070	0	0
ATAAGTTACCGCGACG-1_1	E17.5_1	55228	7771	E17.5_1	44306	7754	11	11
ATAATAGCTGTTGAAT-1_1	E17.5_1	51451	7910	E17.5_1	44565	7898	13	13
ATACCACGGGCAACTT-1_1	E17.5_1	47324	7288	E17.5_1	44364	7281	4	4
ATACCAGGTGAGCGAT-1_1	E17.5_1	40071	7729	E17.5_1	42318	7710	10	10
ATACTAGCATGACCCT-1_1	E17.5_1	52181	7690	E17.5_1	44632	7669	8	8
ATAGACGAAGAGAAAG-1_1	E17.5_1	55889	8177	E17.5_1	44454	8145	18	18
ATAGAGTACTGGGACA-1_1	E17.5_1	26657	6333	E17.5_1	42600	6486	9	9
ATAGGTTGGGCAGATG-1_1	E17.5_1	53916	7929	E17.5_1	44472	7914	15	15
ATAGTCTTTGACGTGC-1_1	E17.5_1	16997	5100	E17.5_1	41882	6355	8	8
ATAGTGAAGCGTTCTC-1_1	E17.5_1	66603	8426	E17.5_1	43998	8115	11	11
ATATAAATGTAGCTGC-1_1	E17.5_1	29726	6162	E17.5_1	42959	6213	0	0
ATATCTTAGGGCCTTC-1_1	E17.5_1	55547	7783	E17.5_1	44347	7761	24	24
ATATTCAGTTAAACCT-1_1	E17.5_1	54013	7666	E17.5_1	44306	7648	7	7
ATATTCCACATAGTGA-1_1	E17.5_1	27782	5858	E17.5_1	43199	6000	0	0
ATATTTAACCCTCAAG-1_1	E17.5_1	21268	5749	E17.5_1	42338	6341	12	12
ATCACGTGCTAATTAA-1_1	E17.5_1	16135	4516	E17.5_1	43695	6025	17	17
ATCAGACGGCACGCCG-1_1	E17.5_1	86328	8832	E17.5_1	43382	7719	23	23
ATCATCCAATATTTGT-1_1	E17.5_1	65797	8340	E17.5_1	44109	8103	24	24
ATCCAACGCAGTCATA-1_1	E17.5_1	30959	6234	E17.5_1	42883	6269	6	6
ATCCAGAGCAACAACC-1_1	E17.5_1	53045	7995	E17.5_1	44523	7989	3	3
ATCCAGGATTCGTGAA-1_1	E17.5_1	58565	7894	E17.5_1	44133	7835	3	3
ATCCTACCTAAGCTCT-1_1	E17.5_1	48340	7864	E17.5_1	44621	7859	3	3
ATCCTGCGTGGAATGG-1_1	E17.5_1	58104	8374	E17.5_1	44487	8329	3	3
ATCCTGCTGCAGATAG-1_1	E17.5_1	17958	5248	E17.5_1	42297	6400	8	8
ATCGACCCAATACAGA-1_1	E17.5_1	64992	8407	E17.5_1	44050	8187	13	13
ATCGCACGCCGGGAGA-1_1	E17.5_1	43128	7602	E17.5_1	43287	7596	5	5
ATCGGAGACAGACGGC-1_1	E17.5_1	27801	5845	E17.5_1	43137	5974	0	0
ATCTAATATCCTACGG-1_1	E17.5_1	21975	5386	E17.5_1	43289	5890	0	0
ATCTGTAATTGTACCC-1_1	E17.5_1	24891	6092	E17.5_1	42570	6398	16	16
ATCTTGACCTGCAACG-1_1	E17.5_1	52046	7867	E17.5_1	44553	7862	30	30
ATGAAGCCAAGGAGCC-1_1	E17.5_1	43816	7186	E17.5_1	43680	7180	18	18
ATGACGCCGGCTCTAA-1_1	E17.5_1	28174	6338	E17.5_1	42609	6494	5	5
ATGAGGAGTGTTAATC-1_1	E17.5_1	43198	7195	E17.5_1	43354	7189	4	4
ATGATGCAATGGTACA-1_1	E17.5_1	63957	8319	E17.5_1	44023	8110	14	14
ATGCACTACCGCATTG-1_1	E17.5_1	46560	7523	E17.5_1	44382	7520	4	4
ATGCATGATCCAGGAT-1_1	E17.5_1	22796	5596	E17.5_1	43035	6046	2	2
ATGCATTCCGTGATGG-1_1	E17.5_1	14730	4893	E17.5_1	41524	6725	27	27
ATGGAGCAGGCCGTGA-1_1	E17.5_1	70856	8621	E17.5_1	44128	8204	21	21
ATGGATTGACCAAACG-1_1	E17.5_1	40083	7023	E17.5_1	42685	7014	2	2
ATGGTGCTCAAAGCCA-1_1	E17.5_1	19662	5432	E17.5_1	41481	6318	25	25
ATGTGCATCCGACGCA-1_1	E17.5_1	37922	7192	E17.5_1	42393	7189	16	16
ATGTGGACATCTTGAT-1_1	E17.5_1	51132	7523	E17.5_1	44451	7518	24	24
ATTAAACATGCGGACC-1_1	E17.5_1	69080	8484	E17.5_1	44077	8108	13	13
ATTACTAGCCTCTTGC-1_1	E17.5_1	27698	6161	E17.5_1	42795	6296	26	26
ATTAGATTGATAGCGG-1_1	E17.5_1	17922	5139	E17.5_1	42748	6268	22	22
ATTATGCCATAGGGAG-1_1	E17.5_1	14859	4525	E17.5_1	42704	6272	12	12
ATTCACTGATGTTGGA-1_1	E17.5_1	22357	5541	E17.5_1	43195	6009	0	0
ATTCATATACTGTCCA-1_1	E17.5_1	54657	7943	E17.5_1	44459	7923	13	13
ATTCCTCCGCCAGTGC-1_1	E17.5_1	35700	6726	E17.5_1	42593	6722	4	4
ATTCTCGTCTCTTTAG-1_1	E17.5_1	33907	7282	E17.5_1	42085	7295	10	10
ATTGAAGATCTTAGTG-1_1	E17.5_1	30418	6726	E17.5_1	42391	6774	12	12
ATTGCTGCTCCTCCAT-1_1	E17.5_1	58658	8052	E17.5_1	44287	7979	21	21
ATTGGGAATATCTTGG-1_1	E17.5_1	22552	6010	E17.5_1	41707	6470	25	25
ATTTAACTCGTATTAC-1_1	E17.5_1	29960	6685	E17.5_1	42212	6787	10	10
ATTTACAGTTTACTGG-1_1	E17.5_1	32530	6382	E17.5_1	42819	6406	4	4
CAAACGAGTATCGCAG-1_1	E17.5_1	58689	8114	E17.5_1	44227	8053	3	3
CAAACGGTCGCACTTT-1_1	E17.5_1	49169	7662	E17.5_1	44533	7655	4	4
CAAACGTGGTCTTGCG-1_1	E17.5_1	57735	7689	E17.5_1	44798	7572	29	29
CAAATGCGGAGTGTTC-1_1	E17.5_1	27606	6570	E17.5_1	42145	6738	10	10
CAAATGTCCTTCCGTG-1_1	E17.5_1	64035	8181	E17.5_1	43925	7972	11	11
CAACGACCCGTTTACA-1_1	E17.5_1	21896	5683	E17.5_1	42577	6232	9	9
CAACTCCTTGATCCCG-1_1	E17.5_1	31931	6572	E17.5_1	42573	6587	26	26
CAAGAGGGCGGAGTAC-1_1	E17.5_1	53405	7686	E17.5_1	44378	7671	0	0
CAAGCGGCACATAATT-1_1	E17.5_1	22822	5420	E17.5_1	43385	5847	0	0
CAAGGATCGCATGTTC-1_1	E17.5_1	59170	8000	E17.5_1	44173	7926	24	24
CAAGTGAACTTTGGTT-1_1	E17.5_1	29870	6957	E17.5_1	42030	7027	10	10
CAATTAAGGGTGATGA-1_1	E17.5_1	67656	8399	E17.5_1	44029	8068	2	2
CAATTTCGTATAAGGG-1_1	E17.5_1	71256	8394	E17.5_1	43794	7900	24	24
CACAATGAGCTGCTAT-1_1	E17.5_1	62908	7935	E17.5_1	43929	7782	11	11
CACAGCTAGGGAGTGA-1_1	E17.5_1	35828	7044	E17.5_1	42374	7047	5	5
CACATATTAGCAGGAT-1_1	E17.5_1	43447	7210	E17.5_1	43452	7206	0	0
CACATGATTCAGCAAC-1_1	E17.5_1	67235	8236	E17.5_1	43872	7891	24	24
CACCCACACGTCACCC-1_1	E17.5_1	36565	7025	E17.5_1	42450	7022	26	26
CACCGCCAGAAGGTTT-1_1	E17.5_1	36352	7112	E17.5_1	42276	7109	5	5
CACGAAAGTTAGTCCC-1_1	E17.5_1	38857	6814	E17.5_1	42647	6811	4	4
CACGACTAAAGTTCTG-1_1	E17.5_1	24543	5982	E17.5_1	42219	6451	27	27
CACGATTGGTCGTTAA-1_1	E17.5_1	47270	7785	E17.5_1	44655	7760	27	27
CACGCAGCGAGGCTTT-1_1	E17.5_1	55625	7959	E17.5_1	44329	7939	2	2
CACTAAAGTTGCCTAT-1_1	E17.5_1	62519	8152	E17.5_1	44018	8025	14	14
CACTACTCAGTTCTGT-1_1	E17.5_1	54231	7468	E17.5_1	44771	7408	29	29
CACTCAAGAGCTATGG-1_1	E17.5_1	58430	8003	E17.5_1	44182	7929	24	24
CACTCGAGCTGAACAA-1_1	E17.5_1	49118	7472	E17.5_1	44468	7467	0	0
CACTTAATCAGACGGA-1_1	E17.5_1	64711	8164	E17.5_1	43922	7935	14	14
CAGACACCGATCGCTG-1_1	E17.5_1	43632	7146	E17.5_1	43616	7142	0	0
CAGACGAACCTGATAC-1_1	E17.5_1	54475	7458	E17.5_1	44239	7434	23	23
CAGAGACGGTCACCCA-1_1	E17.5_1	44426	7208	E17.5_1	43928	7206	23	23
CAGAGCATGAGCTTGC-1_1	E17.5_1	52351	7642	E17.5_1	44468	7632	15	15
CAGAGGCGATGCATGA-1_1	E17.5_1	16067	4592	E17.5_1	43635	6084	17	17
CAGATACTAACATAGT-1_1	E17.5_1	44316	7654	E17.5_1	43926	7649	30	30
CAGCAGCCCGTTCCTT-1_1	E17.5_1	41074	6801	E17.5_1	42837	6795	2	2
CAGCTCACTGAGACAT-1_1	E17.5_1	53961	8064	E17.5_1	44496	8048	18	18
CAGCTCGTGCTTGTGT-1_1	E17.5_1	37186	7486	E17.5_1	42249	7474	22	22
CAGCTTAGTAGGTAGC-1_1	E17.5_1	47993	7564	E17.5_1	44470	7557	2	2
CAGGATATATCGTTGT-1_1	E17.5_1	54220	7870	E17.5_1	44454	7861	13	13
CAGGATCCGCCCGACC-1_1	E17.5_1	36091	7387	E17.5_1	42132	7390	10	10
CAGGCCGTTTGGGTGT-1_1	E17.5_1	58312	7895	E17.5_1	44120	7826	14	14
CAGGCGCCATGCTAGG-1_1	E17.5_1	45506	7141	E17.5_1	44154	7138	0	0
CAGTCTGTATACTGGG-1_1	E17.5_1	49405	7812	E17.5_1	44610	7806	28	28
CAGTTCAAATTGACAC-1_1	E17.5_1	28548	6505	E17.5_1	42572	6583	12	12
CATAATGAGCGGGCGA-1_1	E17.5_1	23978	6008	E17.5_1	42003	6410	25	25
CATACCCGTACCCAGT-1_1	E17.5_1	64917	8156	E17.5_1	43869	7890	4	4
CATACGGCGTCTGGGC-1_1	E17.5_1	63456	8182	E17.5_1	44018	7996	24	24
CATACTATGTAATTGT-1_1	E17.5_1	54994	7983	E17.5_1	44386	7959	23	23
CATAGTAGCATAGTAG-1_1	E17.5_1	39622	7184	E17.5_1	42580	7176	26	26
CATATAGGTACAGTCA-1_1	E17.5_1	53639	7702	E17.5_1	44439	7692	11	11
CATCGCCCGCGGCCAA-1_1	E17.5_1	36208	7406	E17.5_1	42203	7405	22	22
CATCGGACGGGTTAAT-1_1	E17.5_1	54208	7865	E17.5_1	44403	7850	11	11
CATGAACCGACATTTG-1_1	E17.5_1	26020	6137	E17.5_1	42811	6386	8	8
CATGAACCTCTTATCA-1_1	E17.5_1	43687	7648	E17.5_1	43658	7641	5	5
CATGCATGGAGACCCT-1_1	E17.5_1	55610	8432	E17.5_1	44804	8381	8	8
CATGGCAGGAAGATCG-1_1	E17.5_1	36514	7036	E17.5_1	42347	7033	5	5
CATGGTAAGTAGCGTT-1_1	E17.5_1	47826	7520	E17.5_1	44482	7516	0	0
CATGGTCTAGATACCG-1_1	E17.5_1	46116	7368	E17.5_1	44302	7363	15	15
CATTATGCTTGTTGTG-1_1	E17.5_1	29288	6605	E17.5_1	42404	6684	5	5
CATTTATCGTTCAAGA-1_1	E17.5_1	87722	8155	E17.5_1	45213	6502	29	29
CATTTGAGTGGTACGT-1_1	E17.5_1	51851	7510	E17.5_1	44400	7506	23	23
CCAAACAGAACCCTCG-1_1	E17.5_1	29216	6383	E17.5_1	42613	6467	9	9
CCAAGAAAGTGGGCGA-1_1	E17.5_1	59131	7781	E17.5_1	44024	7686	23	23
CCAAGACTTCTGCGAA-1_1	E17.5_1	53289	7694	E17.5_1	44646	7645	8	8
CCAAGGAACAGAGAGG-1_1	E17.5_1	24304	6174	E17.5_1	41994	6513	10	10
CCAATAGTGCCGTCGA-1_1	E17.5_1	53063	7800	E17.5_1	44401	7793	21	21
CCAATGTCACAGCAAG-1_1	E17.5_1	66789	8339	E17.5_1	43877	8022	14	14
CCAATTGAATGTTAAT-1_1	E17.5_1	50614	7757	E17.5_1	44575	7750	18	18
CCACACTGAGATATTA-1_1	E17.5_1	49021	7708	E17.5_1	44521	7705	21	21
CCAGCCTGGACCAATA-1_1	E17.5_1	80166	8623	E17.5_1	43588	7700	24	24
CCAGGGACGTGGCCTC-1_1	E17.5_1	22768	5985	E17.5_1	42216	6360	5	5
CCATCGCAGTTAAACT-1_1	E17.5_1	44192	7319	E17.5_1	43840	7316	13	13
CCATGCCTGTTTAGTA-1_1	E17.5_1	56028	7956	E17.5_1	44296	7924	14	14
CCATTCCCTGCCCACA-1_1	E17.5_1	45984	7349	E17.5_1	44254	7349	4	4
CCATTTCTACCTATTA-1_1	E17.5_1	20654	5119	E17.5_1	43526	5828	0	0
CCCAACATACGTCGCG-1_1	E17.5_1	37507	6615	E17.5_1	42630	6614	17	17
CCCAAGACAGAGTATG-1_1	E17.5_1	13104	4440	E17.5_1	41523	6700	27	27
CCCAATTTCACAACTT-1_1	E17.5_1	53404	7679	E17.5_1	44379	7658	2	2
CCCGCAGCGCGAACTA-1_1	E17.5_1	46025	7420	E17.5_1	44291	7420	13	13
CCCGTCAGCGTCTGAC-1_1	E17.5_1	20959	5492	E17.5_1	42712	6134	12	12
CCCTCATTCTGGAATT-1_1	E17.5_1	45533	8288	E17.5_1	44354	8268	22	22
CCCTCGGGAGCCTTGT-1_1	E17.5_1	20568	5789	E17.5_1	42012	6472	8	8
CCCTTTGACAGGTCTT-1_1	E17.5_1	37447	7023	E17.5_1	42518	7020	0	0
CCGAACCTTCCCGGCC-1_1	E17.5_1	41119	6982	E17.5_1	42822	6978	0	0
CCGACTCGCATAGTCT-1_1	E17.5_1	53815	7648	E17.5_1	44819	7599	29	29
CCGCATGTGGTACGAT-1_1	E17.5_1	25843	5805	E17.5_1	43195	6022	0	0
CCGCGGAATGCGTCAC-1_1	E17.5_1	37358	7007	E17.5_1	42564	7003	0	0
CCGCTATCAGCACCAG-1_1	E17.5_1	54238	7908	E17.5_1	44422	7886	13	13
CCGGGACCCGCAGAGA-1_1	E17.5_1	26449	6251	E17.5_1	42500	6472	8	8
CCGGGTTCGAGGTTAC-1_1	E17.5_1	60895	7823	E17.5_1	43904	7681	4	4
CCGTGCCCATGACGGC-1_1	E17.5_1	18246	5269	E17.5_1	41672	6349	25	25
CCTAAACAGGGTCCGT-1_1	E17.5_1	37772	7578	E17.5_1	42138	7570	10	10
CCTAAATTAACGGTTC-1_1	E17.5_1	61425	8251	E17.5_1	44216	8149	13	13
CCTACTGCTTACACTT-1_1	E17.5_1	28550	6463	E17.5_1	42425	6569	12	12
CCTATGGGTTACCGTC-1_1	E17.5_1	22374	5343	E17.5_1	43435	5869	15	15
CCTCTCTCCCATCTAG-1_1	E17.5_1	43323	7079	E17.5_1	43391	7076	4	4
CCTCTGTACTATTCTA-1_1	E17.5_1	26277	5893	E17.5_1	43139	6069	0	0
CCTGACCACCGATGGT-1_1	E17.5_1	60689	8145	E17.5_1	44219	8058	13	13
CCTGCTATTTGAGAAG-1_1	E17.5_1	25651	6120	E17.5_1	42728	6390	12	12
CCTGGCTAGACCCGCC-1_1	E17.5_1	41827	7370	E17.5_1	42896	7364	4	4
CCTGTAAGACATGATA-1_1	E17.5_1	66179	8160	E17.5_1	43820	7862	14	14
CCTGTCACCCGGGCTC-1_1	E17.5_1	50490	7703	E17.5_1	44579	7698	15	15
CCTGTCGCCCGTAAAT-1_1	E17.5_1	71663	8478	E17.5_1	43865	7999	14	14
CGAAACGCAATTCATG-1_1	E17.5_1	16942	4984	E17.5_1	42820	6315	9	9
CGAACCCGCATGCGTC-1_1	E17.5_1	53233	7785	E17.5_1	44417	7776	3	3
CGAAGACTGCCCGGGA-1_1	E17.5_1	29161	6669	E17.5_1	42250	6803	10	10
CGAAGTTGCTCTGTGT-1_1	E17.5_1	49059	7282	E17.5_1	44409	7275	4	4
CGACAGTTCGCGTTAT-1_1	E17.5_1	68639	8085	E17.5_1	43687	7665	14	14
CGAGACCCTAGAGTGT-1_1	E17.5_1	68378	8362	E17.5_1	43947	8027	13	13
CGAGAGATGTGAACCT-1_1	E17.5_1	74784	8528	E17.5_1	43783	7837	15	15
CGAGCGTTGATCAGCC-1_1	E17.5_1	27102	6349	E17.5_1	42255	6535	10	10
CGAGGCTAAATATGGC-1_1	E17.5_1	69261	8297	E17.5_1	43771	7833	15	15
CGAGTACTAAAGAGGA-1_1	E17.5_1	10335	3667	E17.5_1	43606	6632	17	17
CGATACCTCGCGGACA-1_1	E17.5_1	52981	7789	E17.5_1	44465	7778	14	14
CGATCCGACCCAGTGC-1_1	E17.5_1	71892	8419	E17.5_1	43758	7872	14	14
CGATTAAATATCTCCT-1_1	E17.5_1	28170	5949	E17.5_1	43033	6048	0	0
CGCAAACACGAGTTAC-1_1	E17.5_1	42035	7037	E17.5_1	42976	7034	4	4
CGCAATTAGGGTAATA-1_1	E17.5_1	41588	7261	E17.5_1	42820	7256	4	4
CGCATGGTGCGATGCT-1_1	E17.5_1	66305	8386	E17.5_1	44009	8097	13	13
CGCATTAGCTAATAGG-1_1	E17.5_1	19732	5271	E17.5_1	42814	6094	12	12
CGCCTCCCTCCTCTAT-1_1	E17.5_1	52436	7625	E17.5_1	44442	7615	0	0
CGCGCATGTTTGATTG-1_1	E17.5_1	46761	7477	E17.5_1	44346	7473	23	23
CGCGTTCATGAAATAC-1_1	E17.5_1	28326	6368	E17.5_1	42509	6463	12	12
CGCTACGGGACATTTA-1_1	E17.5_1	55471	7735	E17.5_1	44282	7711	14	14
CGCTATTCTTAGGCTC-1_1	E17.5_1	64979	8153	E17.5_1	43981	7920	24	24
CGCTCTCCGTAGATTA-1_1	E17.5_1	42396	7053	E17.5_1	43060	7047	4	4
CGCTGTGACGCCGCAC-1_1	E17.5_1	50964	7751	E17.5_1	44589	7737	30	30
CGCTTTCATACCGGTG-1_1	E17.5_1	19656	5515	E17.5_1	41580	6317	25	25
CGGAACGTAAACATAG-1_1	E17.5_1	59740	8047	E17.5_1	44147	7964	3	3
CGGAGCAATTTAATCG-1_1	E17.5_1	36818	6714	E17.5_1	42604	6712	23	23
CGGAGCATGGCGATCC-1_1	E17.5_1	66268	8411	E17.5_1	43981	8137	24	24
CGGAGTTTGAGAGACA-1_1	E17.5_1	43341	6931	E17.5_1	43401	6930	4	4
CGGCAAACATCGTGCG-1_1	E17.5_1	38093	6850	E17.5_1	42600	6847	0	0
CGGCCACGCACAAAGT-1_1	E17.5_1	73535	8574	E17.5_1	43824	7946	11	11
CGGCTGCAAGATTAAG-1_1	E17.5_1	20949	5663	E17.5_1	42329	6393	16	16
CGGGAATTTATGTAAA-1_1	E17.5_1	62324	8271	E17.5_1	44141	8132	28	28
CGGGATCAATGTAAGA-1_1	E17.5_1	30944	6690	E17.5_1	42505	6735	9	9
CGGGCAGCTAAACCGC-1_1	E17.5_1	38431	7394	E17.5_1	42390	7391	12	12
CGGGCCTTCTTTGTAA-1_1	E17.5_1	56542	8011	E17.5_1	44325	7978	11	11
CGGTGCAGATAGAACG-1_1	E17.5_1	48585	7345	E17.5_1	44396	7344	7	7
CGGTGCGCGTTGGTCC-1_1	E17.5_1	19923	5043	E17.5_1	43570	5855	17	17
CGTAGCGCCGACGTTG-1_1	E17.5_1	44857	8271	E17.5_1	44174	8263	10	10
CGTATTAAGAGATCTA-1_1	E17.5_1	24450	6221	E17.5_1	42395	6496	12	12
CGTCACGTCCATTGGT-1_1	E17.5_1	54595	7681	E17.5_1	44320	7660	14	14
CGTCAGTGCGCACAAG-1_1	E17.5_1	34503	7261	E17.5_1	42149	7271	10	10
CGTGAAGTTAATTCAC-1_1	E17.5_1	43949	7222	E17.5_1	43748	7220	11	11
CGTGCAGACTGGGACA-1_1	E17.5_1	21441	4838	E17.5_1	44065	5563	0	0
CGTGCATTGTCGACGC-1_1	E17.5_1	34962	6499	E17.5_1	42747	6502	2	2
CGTGCCCGACATTTGT-1_1	E17.5_1	19521	5563	E17.5_1	41917	6405	8	8
CGTGTCCCATTCGCGA-1_1	E17.5_1	23128	5727	E17.5_1	43147	6102	4	4
CGTTGAGCGACCGTCG-1_1	E17.5_1	44078	7116	E17.5_1	43787	7115	0	0
CGTTTCGCTCATTACA-1_1	E17.5_1	57553	7749	E17.5_1	44072	7676	14	14
CTAAACGGGTGTAATC-1_1	E17.5_1	23976	6048	E17.5_1	42218	6430	8	8
CTAAAGGGAAATAGGA-1_1	E17.5_1	73050	8540	E17.5_1	43890	7995	13	13
CTAACCGCGCGCCCGT-1_1	E17.5_1	41565	7392	E17.5_1	42830	7388	9	9
CTAAGGGAATGATTGG-1_1	E17.5_1	51178	7724	E17.5_1	44504	7721	0	0
CTAATTCGCACGCGCT-1_1	E17.5_1	40428	6868	E17.5_1	42762	6867	4	4
CTACGCACGGAGTACC-1_1	E17.5_1	58114	8159	E17.5_1	44274	8102	21	21
CTACTGCCACCTGACC-1_1	E17.5_1	57518	7935	E17.5_1	44243	7876	15	15
CTAGATTTACGACGGC-1_1	E17.5_1	51347	7923	E17.5_1	44588	7922	21	21
CTAGTCACGTCTTAAG-1_1	E17.5_1	71471	8277	E17.5_1	43703	7738	11	11
CTAGTTACAACCCGGT-1_1	E17.5_1	31131	6294	E17.5_1	42810	6319	0	0
CTAGTTGGGCCCGGTA-1_1	E17.5_1	50877	7625	E17.5_1	44465	7617	15	15
CTATGTCACTAGCCCA-1_1	E17.5_1	66703	8511	E17.5_1	44142	8212	2	2
CTATTCATGTGTCCCA-1_1	E17.5_1	29331	6249	E17.5_1	42857	6319	0	0
CTCATTTGATGGGCGG-1_1	E17.5_1	30642	6593	E17.5_1	42516	6649	8	8
CTCCGCCCACATGAGG-1_1	E17.5_1	43394	6988	E17.5_1	43413	6986	7	7
CTCCGGCCTAATATGC-1_1	E17.5_1	29215	6467	E17.5_1	42387	6585	5	5
CTCGAGGTCGAACAGT-1_1	E17.5_1	31182	6670	E17.5_1	42383	6706	12	12
CTCGCACCTATATAGT-1_1	E17.5_1	23877	5578	E17.5_1	43223	5959	2	2
CTCGGTCCGTAGCCTG-1_1	E17.5_1	24129	5866	E17.5_1	42996	6246	8	8
CTCTATTTGGCTGCAG-1_1	E17.5_1	44111	7148	E17.5_1	43812	7147	13	13
CTCTGCGAAGCAAGCA-1_1	E17.5_1	19958	5674	E17.5_1	41601	6432	25	25
CTCTGTGCCTGCTATG-1_1	E17.5_1	33221	7197	E17.5_1	42075	7227	10	10
CTCTTGTCCCGCTTGG-1_1	E17.5_1	29433	6002	E17.5_1	42977	6062	23	23
CTGAATCCGAGACCTC-1_1	E17.5_1	60873	7991	E17.5_1	44033	7860	11	11
CTGCACAACTACATAT-1_1	E17.5_1	33535	6401	E17.5_1	42870	6405	0	0
CTGCACCTGGAACCGC-1_1	E17.5_1	31173	6920	E17.5_1	42156	6966	10	10
CTGCACTCCAGTACAG-1_1	E17.5_1	18684	4821	E17.5_1	43565	5843	0	0
CTGCCATGCATCACAT-1_1	E17.5_1	54761	7987	E17.5_1	44465	7975	13	13
CTGCTTGGCGATAGCT-1_1	E17.5_1	22261	5290	E17.5_1	43535	5814	0	0
CTGGAAATGGATGCTT-1_1	E17.5_1	14059	4548	E17.5_1	42222	6356	12	12
CTGGATTTACACTTGA-1_1	E17.5_1	45076	7179	E17.5_1	44104	7178	11	11
CTGGCTGGTTGTCAGT-1_1	E17.5_1	30603	6048	E17.5_1	42982	6091	23	23
CTGGGCGGCCAAATGT-1_1	E17.5_1	37987	7228	E17.5_1	42283	7221	16	16
CTGTACTTCTTAGCAT-1_1	E17.5_1	57635	7886	E17.5_1	44185	7846	14	14
CTGTGCAGGGTAGGTC-1_1	E17.5_1	57624	7954	E17.5_1	44194	7901	24	24
CTGTTACCCAATCTAG-1_1	E17.5_1	47752	7541	E17.5_1	44455	7539	11	11
CTGTTCACTGCCTGTG-1_1	E17.5_1	22790	5851	E17.5_1	42677	6294	12	12
CTTACACTGGGAAATA-1_1	E17.5_1	23720	6006	E17.5_1	42473	6390	8	8
CTTCATTGTCAGTGGA-1_1	E17.5_1	65802	8464	E17.5_1	44017	8217	11	11
CTTCGTAGATAGGTGA-1_1	E17.5_1	56477	7744	E17.5_1	44198	7694	14	14
CTTCTATTAATGCTAG-1_1	E17.5_1	50694	7618	E17.5_1	44458	7613	0	0
CTTCTTACGTCGTATA-1_1	E17.5_1	28494	6129	E17.5_1	42622	6299	16	16
CTTGCCCAGGCTCTAC-1_1	E17.5_1	50030	7558	E17.5_1	44474	7552	11	11
CTTGTACTTGTTGACT-1_1	E17.5_1	28987	6355	E17.5_1	42429	6466	5	5
CTTGTCAACATTCGAG-1_1	E17.5_1	43894	7350	E17.5_1	43727	7348	13	13
CTTTAATATTGGTCGA-1_1	E17.5_1	29543	6172	E17.5_1	42936	6240	0	0
CTTTAGTGCTATTATT-1_1	E17.5_1	49240	7636	E17.5_1	44530	7634	13	13
CTTTCTGTGCGGGCTT-1_1	E17.5_1	23276	5461	E17.5_1	43419	5869	0	0
CTTTGGCTTTAGTAAA-1_1	E17.5_1	66210	8060	E17.5_1	43729	7731	4	4
GAAACCGAATTACCTT-1_1	E17.5_1	78008	8584	E17.5_1	43624	7731	14	14
GAAATGGCGGTGTTAG-1_1	E17.5_1	15067	4698	E17.5_1	42321	6349	12	12
GAAATTCACATCGCTG-1_1	E17.5_1	37322	7523	E17.5_1	42167	7513	10	10
GAAATTGTCTCTATAA-1_1	E17.5_1	67973	8311	E17.5_1	43956	7992	11	11
GAACACACATCAACCA-1_1	E17.5_1	32161	6733	E17.5_1	42378	6768	5	5
GAACCATCTGGGAGAC-1_1	E17.5_1	42654	7980	E17.5_1	43048	7967	10	10
GAAGAACGGTGCAGGT-1_1	E17.5_1	46224	8069	E17.5_1	44445	8050	22	22
GAAGCGTGAGGAATTT-1_1	E17.5_1	60200	8257	E17.5_1	44222	8175	21	21
GAAGCTTGCTGACCGC-1_1	E17.5_1	41359	6871	E17.5_1	42879	6866	4	4
GAAGTCAGTTGCACTA-1_1	E17.5_1	44644	7198	E17.5_1	44001	7195	23	23
GAAGTGATTTATCGTG-1_1	E17.5_1	60079	8089	E17.5_1	44183	8005	3	3
GAAGTGCTGGATAGCT-1_1	E17.5_1	39972	7148	E17.5_1	42548	7146	5	5
GAAGTTTCCACTCAAT-1_1	E17.5_1	75718	8542	E17.5_1	43605	7776	14	14
GAATCGACATGGTCAC-1_1	E17.5_1	55507	8012	E17.5_1	44378	7985	4	4
GAATCGCCGGACACGG-1_1	E17.5_1	10712	3864	E17.5_1	42722	6684	22	22
GAATCTGAACATTCTC-1_1	E17.5_1	59397	8342	E17.5_1	44432	8280	28	28
GAATTCACCCGGGTGT-1_1	E17.5_1	57535	7879	E17.5_1	44210	7834	11	11
GAATTTCTCGCTGCAG-1_1	E17.5_1	48817	7506	E17.5_1	44465	7499	2	2
GACAACGCAGCTTACG-1_1	E17.5_1	31374	6632	E17.5_1	42578	6676	12	12
GACACAAGGGAAGAAA-1_1	E17.5_1	74991	8700	E17.5_1	43895	7974	15	15
GACACTGAGTTCAGTG-1_1	E17.5_1	58270	8172	E17.5_1	44335	8119	3	3
GACATCGATTTATAAC-1_1	E17.5_1	52140	7641	E17.5_1	44452	7630	0	0
GACCAGAGCCCTGTAG-1_1	E17.5_1	29824	6568	E17.5_1	42613	6617	9	9
GACCAGGTCATTCATA-1_1	E17.5_1	27548	6275	E17.5_1	42425	6482	16	16
GACCGTGCTGACGGTG-1_1	E17.5_1	57406	8037	E17.5_1	44314	7995	11	11
GACGACGATCCGCGTT-1_1	E17.5_1	28730	6027	E17.5_1	42956	6109	0	0
GACGCCGTAAAGGCTA-1_1	E17.5_1	40547	6939	E17.5_1	42756	6939	0	0
GACGCTTGCTTCTAAA-1_1	E17.5_1	55519	7957	E17.5_1	44291	7927	2	2
GACGTGTAGGGATTAT-1_1	E17.5_1	6181	2298	E17.5_1	44824	6947	4	4
GACTAAGATCATGCAC-1_1	E17.5_1	10635	3743	E17.5_1	42950	6585	12	12
GACTAAGTAGGCTCAC-1_1	E17.5_1	47558	7660	E17.5_1	44496	7659	4	4
GAGACTGATGGGTAGA-1_1	E17.5_1	25416	6108	E17.5_1	42696	6329	12	12
GAGACTTCGCGACCGA-1_1	E17.5_1	38152	6708	E17.5_1	42633	6707	23	23
GAGAGGGCGCGAGGTT-1_1	E17.5_1	75597	8423	E17.5_1	43552	7678	14	14
GAGATCTGCTTGGCAT-1_1	E17.5_1	60234	8266	E17.5_1	44213	8160	21	21
GAGATCTGTCACTCCG-1_1	E17.5_1	71521	8568	E17.5_1	43901	8008	15	15
GAGATCTTCCATGACA-1_1	E17.5_1	50671	7583	E17.5_1	44472	7580	0	0
GAGATGGGAGTCGACA-1_1	E17.5_1	30402	6185	E17.5_1	42893	6235	0	0
GAGCCACGGTAGTAGG-1_1	E17.5_1	33692	7093	E17.5_1	42166	7112	10	10
GAGGAATGGAGAGGTT-1_1	E17.5_1	39730	7003	E17.5_1	42661	6999	2	2
GAGGAGTAATTCCTAC-1_1	E17.5_1	18658	5194	E17.5_1	42258	6364	27	27
GAGTACGGGTATACAA-1_1	E17.5_1	45033	8054	E17.5_1	44180	8030	22	22
GAGTATGCCCGCCTTG-1_1	E17.5_1	49523	7506	E17.5_1	44462	7502	0	0
GAGTCCGCTTACCGGA-1_1	E17.5_1	56370	7901	E17.5_1	44286	7853	11	11
GATAAATCGGTGGATG-1_1	E17.5_1	46687	8329	E17.5_1	44572	8302	22	22
GATACGATGGGAGTCA-1_1	E17.5_1	60501	8037	E17.5_1	44094	7921	3	3
GATAGGTAACGTTGAC-1_1	E17.5_1	54031	7846	E17.5_1	44444	7831	13	13
GATCATTCCAAACATT-1_1	E17.5_1	29151	6628	E17.5_1	42282	6688	5	5
GATCGACACTATCTGA-1_1	E17.5_1	35983	7179	E17.5_1	42373	7175	26	26
GATCGCGGGCTCTCCA-1_1	E17.5_1	67544	8246	E17.5_1	43827	7885	14	14
GATCGGTGGCCATAAC-1_1	E17.5_1	45363	7256	E17.5_1	44171	7254	15	15
GATCTTGGAGGGCATA-1_1	E17.5_1	58141	8079	E17.5_1	44243	8031	13	13
GATCTTTGCAGGGTAT-1_1	E17.5_1	35258	6683	E17.5_1	42622	6680	18	18
GATGCGTCCTGCATTC-1_1	E17.5_1	66711	8200	E17.5_1	43893	7894	24	24
GATGCTACAAGCGCCT-1_1	E17.5_1	28348	6421	E17.5_1	42574	6548	8	8
GATGCTGTATTTCATC-1_1	E17.5_1	55103	7631	E17.5_1	44298	7610	0	0
GATGTTCAATCCACGA-1_1	E17.5_1	54660	7954	E17.5_1	44409	7932	3	3
GATTACTGAATTTGGG-1_1	E17.5_1	46779	7342	E17.5_1	44354	7338	7	7
GATTCCCTTGTCGCAG-1_1	E17.5_1	47689	7483	E17.5_1	44433	7480	15	15
GATTCGACGGTTCACG-1_1	E17.5_1	54260	7774	E17.5_1	44375	7749	0	0
GCAAACCTTGGCCATA-1_1	E17.5_1	32349	6354	E17.5_1	42837	6370	0	0
GCAAATATTACGCTTT-1_1	E17.5_1	57832	8070	E17.5_1	44302	8029	21	21
GCAAGAATTCCTTGGC-1_1	E17.5_1	41719	6716	E17.5_1	42958	6711	7	7
GCAAGTGCACAGAGAA-1_1	E17.5_1	50240	7791	E17.5_1	44591	7787	30	30
GCACTAGTCGCGCTAT-1_1	E17.5_1	36299	7229	E17.5_1	42306	7223	22	22
GCACTCCCACAGTCCC-1_1	E17.5_1	23272	5894	E17.5_1	42073	6372	25	25
GCAGATTAGGGATATC-1_1	E17.5_1	80918	8754	E17.5_1	43758	7823	24	24
GCAGCACACAGCCCAG-1_1	E17.5_1	73812	8276	E17.5_1	43478	7534	14	14
GCATAGAGCACTCAGG-1_1	E17.5_1	67910	8233	E17.5_1	43824	7891	24	24
GCATCCCTAACTTTGA-1_1	E17.5_1	43820	7926	E17.5_1	43725	7925	16	16
GCCACAATTTAAGGAC-1_1	E17.5_1	50146	7299	E17.5_1	44371	7297	7	7
GCCATCGAGCTGCGTG-1_1	E17.5_1	45615	7429	E17.5_1	44195	7427	17	17
GCCCGATCTGTGGTCG-1_1	E17.5_1	30461	6180	E17.5_1	42892	6231	11	11
GCCCGCGCGTAAACGG-1_1	E17.5_1	59063	7710	E17.5_1	44007	7625	7	7
GCCGAAATTCCTACGT-1_1	E17.5_1	70939	8237	E17.5_1	43684	7729	14	14
GCCGATTGGCCAAGCT-1_1	E17.5_1	64837	8289	E17.5_1	44127	8082	13	13
GCCGCTTGTGAGAAAC-1_1	E17.5_1	68692	8349	E17.5_1	43822	7981	14	14
GCCGGAAACACATCTT-1_1	E17.5_1	14592	4803	E17.5_1	41546	6677	27	27
GCCGGGTTAGGGTCGC-1_1	E17.5_1	62428	8343	E17.5_1	44188	8213	13	13
GCCTATTTGCTACACA-1_1	E17.5_1	74602	9634	E17.5_1	45717	8886	10	10
GCCTTCAGCCCTACCG-1_1	E17.5_1	33592	6874	E17.5_1	42287	6895	8	8
GCGACGATAGTTGTAC-1_1	E17.5_1	54063	7693	E17.5_1	44390	7679	11	11
GCGAGGCCCGAGCAGA-1_1	E17.5_1	73054	8615	E17.5_1	43948	8085	14	14
GCGAGTTCTGCAAAGA-1_1	E17.5_1	74163	8655	E17.5_1	43847	8055	21	21
GCGCCGTTCCACGATA-1_1	E17.5_1	54295	7959	E17.5_1	44458	7946	28	28
GCGCTATGCCGAGGCA-1_1	E17.5_1	54189	8097	E17.5_1	44506	8084	3	3
GCGGACCGCGTTGTGG-1_1	E17.5_1	32091	6386	E17.5_1	42814	6407	17	17
GCGGCTCTGACGTACC-1_1	E17.5_1	51302	7453	E17.5_1	44412	7448	14	14
GCGGGAACCAGGCCCT-1_1	E17.5_1	19665	5303	E17.5_1	42919	6198	22	22
GCGGTCCCTAGACGCA-1_1	E17.5_1	24170	6134	E17.5_1	42673	6498	22	22
GCGGTTCCCTATCATG-1_1	E17.5_1	52828	7921	E17.5_1	44512	7914	3	3
GCGTCGAAATGTCGGT-1_1	E17.5_1	9577	3456	E17.5_1	42977	6729	9	9
GCGTCGCCAGGGTGAT-1_1	E17.5_1	19803	4955	E17.5_1	43590	5790	0	0
GCGTCTCTGCATTGGG-1_1	E17.5_1	52473	7404	E17.5_1	44339	7398	14	14
GCTAATACCGAATGCC-1_1	E17.5_1	46309	7368	E17.5_1	44296	7365	18	18
GCTACGACTTATTGGG-1_1	E17.5_1	52927	7792	E17.5_1	44457	7784	13	13
GCTAGCTTGAATAGCT-1_1	E17.5_1	35974	6733	E17.5_1	42635	6733	17	17
GCTAGTAGAGCTTGTA-1_1	E17.5_1	75212	8550	E17.5_1	43734	7871	24	24
GCTCTAAACCCTGACG-1_1	E17.5_1	37230	7216	E17.5_1	42307	7213	9	9
GCTCTATGTTACGTGC-1_1	E17.5_1	42520	7203	E17.5_1	43094	7200	4	4
GCTCTCGGGTACCGAA-1_1	E17.5_1	38006	7072	E17.5_1	42385	7070	5	5
GCTGAGGCGTGAGTAT-1_1	E17.5_1	68472	8439	E17.5_1	43909	8091	13	13
GCTGCACGGTTTCTTA-1_1	E17.5_1	53634	7582	E17.5_1	44331	7570	0	0
GCTGCTACTGCGTAGC-1_1	E17.5_1	25799	5840	E17.5_1	43268	6056	0	0
GCTGCTCTCCGGACAC-1_1	E17.5_1	33458	6987	E17.5_1	42443	6991	9	9
GCTGGCATATTCACCT-1_1	E17.5_1	49746	7544	E17.5_1	44524	7541	4	4
GCTGGCGGCGCATGCT-1_1	E17.5_1	26878	5914	E17.5_1	43128	6067	0	0
GCTGTATTACTGGCCC-1_1	E17.5_1	46698	7048	E17.5_1	44275	7042	7	7
GGAACCGTGTAAATTG-1_1	E17.5_1	67048	8074	E17.5_1	43674	7692	23	23
GGACCAACAGGATAAC-1_1	E17.5_1	50823	7557	E17.5_1	44482	7555	13	13
GGAGAAGTCATTGGCA-1_1	E17.5_1	26009	6140	E17.5_1	42767	6315	26	26
GGAGACGACACCTTTG-1_1	E17.5_1	54113	8033	E17.5_1	44482	8008	28	28
GGAGTGCCGCCCTGGA-1_1	E17.5_1	33615	6783	E17.5_1	42342	6791	5	5
GGATACTCATGAATTG-1_1	E17.5_1	21349	5835	E17.5_1	42374	6443	8	8
GGATCAAAGGACGAGG-1_1	E17.5_1	64724	9233	E17.5_1	45430	8862	10	10
GGATGACGCGAGTTTA-1_1	E17.5_1	67889	8233	E17.5_1	43773	7861	14	14
GGCAAATTACTTTACT-1_1	E17.5_1	54715	7935	E17.5_1	44403	7918	0	0
GGCAAGGCGAAATAGC-1_1	E17.5_1	64697	8317	E17.5_1	43959	8083	13	13
GGCAATAGTCAATGAG-1_1	E17.5_1	67692	8390	E17.5_1	44018	8073	15	15
GGCACTCCACTGGGCA-1_1	E17.5_1	59681	8079	E17.5_1	44155	7984	14	14
GGCATACAGGTAGCGG-1_1	E17.5_1	35317	6479	E17.5_1	42681	6484	4	4
GGCATCAACGAGCACG-1_1	E17.5_1	19154	5526	E17.5_1	41506	6560	27	27
GGCGCATGAATTGATG-1_1	E17.5_1	56310	7981	E17.5_1	44310	7927	11	11
GGCGCGTTCGAGTTTA-1_1	E17.5_1	55378	7963	E17.5_1	44429	7945	0	0
GGCGGAGTAATATTAG-1_1	E17.5_1	42999	7482	E17.5_1	43239	7474	9	9
GGCGTACCCTATATAA-1_1	E17.5_1	10708	3927	E17.5_1	41555	6804	27	27
GGCGTCCTATCCGCTG-1_1	E17.5_1	35267	6646	E17.5_1	42603	6644	4	4
GGCTCTGCTCCAACGC-1_1	E17.5_1	55880	7781	E17.5_1	44252	7745	15	15
GGGAACGGGAGGTTAG-1_1	E17.5_1	45747	7164	E17.5_1	44213	7162	14	14
GGGAGGATGCCCGAAA-1_1	E17.5_1	72631	8455	E17.5_1	43834	7873	14	14
GGGATGGTCGTAACCG-1_1	E17.5_1	55778	7738	E17.5_1	44245	7705	7	7
GGGCCCGTCTTAAACA-1_1	E17.5_1	71558	8480	E17.5_1	43776	7976	11	11
GGGCGATATGTGTGAA-1_1	E17.5_1	27822	6306	E17.5_1	42610	6432	12	12
GGGCGGCAAATGAATT-1_1	E17.5_1	64867	8045	E17.5_1	43807	7793	23	23
GGGCGGGTTCCCTACG-1_1	E17.5_1	38460	6769	E17.5_1	42663	6768	0	0
GGGCGTACATTTATAT-1_1	E17.5_1	31546	6642	E17.5_1	42454	6676	5	5
GGGCGTCACCACGTAA-1_1	E17.5_1	53293	7996	E17.5_1	44525	7986	3	3
GGGCTGGTTAGTCGCG-1_1	E17.5_1	32020	6802	E17.5_1	42474	6817	12	12
GGGTACTTCATGAACT-1_1	E17.5_1	53404	7671	E17.5_1	44382	7661	14	14
GGGTCACCGTGACGGT-1_1	E17.5_1	77897	8381	E17.5_1	43421	7495	14	14
GGGTGACACCTTAACT-1_1	E17.5_1	52914	7647	E17.5_1	44379	7635	11	11
GGGTGGTCCAGCCTGT-1_1	E17.5_1	36715	7372	E17.5_1	42142	7358	16	16
GGGTTAACATTTGAGT-1_1	E17.5_1	38650	6980	E17.5_1	42592	6978	0	0
GGTAACTATGTATCTG-1_1	E17.5_1	27758	6464	E17.5_1	42480	6614	22	22
GGTACAAACATGCTAT-1_1	E17.5_1	64543	8233	E17.5_1	43984	8001	11	11
GGTAGAAGACCGCCTG-1_1	E17.5_1	26277	5824	E17.5_1	43204	6025	0	0
GGTAGACCGTTGGGCG-1_1	E17.5_1	43692	7143	E17.5_1	43660	7141	0	0
GGTATTGCCGAGTTTA-1_1	E17.5_1	27464	6413	E17.5_1	42482	6515	12	12
GGTCAGTGGGTCCCAC-1_1	E17.5_1	55440	7969	E17.5_1	44405	7936	13	13
GGTGAAACCGGGAATG-1_1	E17.5_1	62380	9167	E17.5_1	45277	8940	10	10
GGTGAAGTACAGGGAT-1_1	E17.5_1	22855	5336	E17.5_1	43658	5794	17	17
GGTGCGGATAAGTGGC-1_1	E17.5_1	29103	6702	E17.5_1	42503	6812	22	22
GGTGCTGGTACACATT-1_1	E17.5_1	47386	7504	E17.5_1	44408	7498	3	3
GGTTAGGCTTGGAGAA-1_1	E17.5_1	44568	7214	E17.5_1	43952	7209	4	4
GGTTGTATCGTGAAAT-1_1	E17.5_1	11756	4109	E17.5_1	41637	6742	27	27
GGTTTGAGTGCTGGAA-1_1	E17.5_1	33023	6884	E17.5_1	42405	6899	8	8
GTAAGTAGGGTATACC-1_1	E17.5_1	46514	7311	E17.5_1	44294	7303	4	4
GTAATCTGATTCTTCG-1_1	E17.5_1	48404	7629	E17.5_1	44529	7623	21	21
GTACACTTACCTGAAG-1_1	E17.5_1	68606	8347	E17.5_1	43881	7972	21	21
GTACGAGATTGCGACA-1_1	E17.5_1	17986	5041	E17.5_1	42707	6132	12	12
GTACGCTTCATTGCAC-1_1	E17.5_1	50771	7570	E17.5_1	44496	7564	24	24
GTACGTTTGCCCGTCA-1_1	E17.5_1	52106	7825	E17.5_1	44517	7816	13	13
GTACTAAGATTTGGAG-1_1	E17.5_1	25944	6077	E17.5_1	42650	6275	12	12
GTACTCCCTTATCGCT-1_1	E17.5_1	13086	4148	E17.5_1	43280	6360	2	2
GTACTGAGGTCGTAAC-1_1	E17.5_1	34905	7116	E17.5_1	42226	7122	10	10
GTAGACAACCGATGAA-1_1	E17.5_1	37115	7339	E17.5_1	42198	7337	10	10
GTAGACGTCGTTACAT-1_1	E17.5_1	32692	6650	E17.5_1	42372	6691	8	8
GTAGCCAAACATGGGA-1_1	E17.5_1	44445	7118	E17.5_1	43937	7116	24	24
GTAGCGCTGTTGTAGT-1_1	E17.5_1	72984	9429	E17.5_1	45889	8613	10	10
GTAGCGGCTATACACT-1_1	E17.5_1	64936	8167	E17.5_1	43905	7926	11	11
GTATAGGACTCAGTAG-1_1	E17.5_1	18621	5179	E17.5_1	42788	6162	12	12
GTATCTTGTTGCTCAC-1_1	E17.5_1	33079	7116	E17.5_1	41899	7146	27	27
GTATCTTTCATAACCA-1_1	E17.5_1	54056	8007	E17.5_1	44484	7984	28	28
GTATTCTGAGAAACGA-1_1	E17.5_1	28289	5894	E17.5_1	43155	6019	17	17
GTCAATTGTACTGAAG-1_1	E17.5_1	22087	5941	E17.5_1	42338	6515	8	8
GTCAGAATAGTCTATG-1_1	E17.5_1	39676	6903	E17.5_1	42676	6901	4	4
GTCATGGACATGACTA-1_1	E17.5_1	25923	5948	E17.5_1	43026	6162	2	2
GTCATTAGAGCGAACG-1_1	E17.5_1	67056	8207	E17.5_1	43790	7864	24	24
GTCCGGCTGAATTGCG-1_1	E17.5_1	17857	5153	E17.5_1	42387	6229	12	12
GTCGTACCATCTCGGG-1_1	E17.5_1	46936	7484	E17.5_1	44378	7480	13	13
GTCGTCAATTATAAGG-1_1	E17.5_1	14843	4747	E17.5_1	42528	6450	8	8
GTCGTTATTCGCTTAT-1_1	E17.5_1	37205	6680	E17.5_1	42651	6681	0	0
GTCTATCTGAGTTTCT-1_1	E17.5_1	51113	7662	E17.5_1	44523	7657	14	14
GTCTCGCCAACACGCC-1_1	E17.5_1	40603	7276	E17.5_1	42612	7273	16	16
GTCTGGGCGGTCGAGA-1_1	E17.5_1	57183	7875	E17.5_1	44177	7825	3	3
GTGACTTCAGTAGTGC-1_1	E17.5_1	64239	8387	E17.5_1	44142	8208	3	3
GTGAGTGGTACAACGC-1_1	E17.5_1	45903	7076	E17.5_1	44186	7074	23	23
GTGATCATAGATCTGC-1_1	E17.5_1	65102	8169	E17.5_1	43921	7938	11	11
GTGATTCGCCGCTCAA-1_1	E17.5_1	49171	7441	E17.5_1	44457	7436	7	7
GTGCAACAAATGTGGC-1_1	E17.5_1	39269	6917	E17.5_1	42527	6917	5	5
GTGCCATCACACGGTG-1_1	E17.5_1	7960	3010	E17.5_1	43995	6809	17	17
GTGCCGCTTCAAAGGT-1_1	E17.5_1	57108	7887	E17.5_1	44190	7831	3	3
GTGCGAAATCGAACAC-1_1	E17.5_1	68635	8157	E17.5_1	43639	7707	23	23
GTGCGGGTCTCCAAAT-1_1	E17.5_1	15217	4690	E17.5_1	42799	6354	12	12
GTGCTCAAGTACTGTC-1_1	E17.5_1	34687	6938	E17.5_1	42467	6937	18	18
GTGGACGCATTTGTCC-1_1	E17.5_1	25961	5704	E17.5_1	43353	5903	0	0
GTGGGCTTAGACACAC-1_1	E17.5_1	38296	6764	E17.5_1	42627	6762	4	4
GTTAACATCACTTAAA-1_1	E17.5_1	24106	5575	E17.5_1	43477	5927	0	0
GTTACAATTGGTGACG-1_1	E17.5_1	54152	7718	E17.5_1	44319	7691	4	4
GTTACCTACAACTTGC-1_1	E17.5_1	51960	7737	E17.5_1	44542	7731	13	13
GTTACTTTGGGCCTAG-1_1	E17.5_1	55395	7774	E17.5_1	44286	7742	11	11
GTTATATTATCTCCCT-1_1	E17.5_1	41621	7206	E17.5_1	42894	7205	11	11
GTTCGCCATAAGTGCC-1_1	E17.5_1	60998	8099	E17.5_1	44111	7978	14	14
GTTCTTCCCTCGATGT-1_1	E17.5_1	32476	6846	E17.5_1	42244	6885	10	10
GTTGAACCGGTTCCAT-1_1	E17.5_1	59361	7857	E17.5_1	44021	7762	7	7
GTTGCACGGAGTTTCG-1_1	E17.5_1	35175	7074	E17.5_1	42395	7070	26	26
GTTGGATTTGCGTTGG-1_1	E17.5_1	56984	7894	E17.5_1	44282	7858	14	14
GTTGGTCATGCTATCC-1_1	E17.5_1	22103	5302	E17.5_1	43459	5843	0	0
GTTGTCGTGTTAGTTG-1_1	E17.5_1	19780	5470	E17.5_1	42241	6329	8	8
GTTTACGTTCCATCTG-1_1	E17.5_1	48661	7568	E17.5_1	44481	7560	13	13
GTTTCCTGGAGGGTGA-1_1	E17.5_1	24588	5952	E17.5_1	42527	6276	12	12
GTTTCTGCAGTCTCCC-1_1	E17.5_1	54668	7707	E17.5_1	44321	7692	0	0
GTTTGACCAAATCCTA-1_1	E17.5_1	29355	6576	E17.5_1	42444	6642	5	5
GTTTGGGCTTGTGAGC-1_1	E17.5_1	37550	6883	E17.5_1	42566	6880	0	0
GTTTGGTAGGGTCAAC-1_1	E17.5_1	33498	6492	E17.5_1	42707	6501	23	23
TAAAGAGCCCGAAACC-1_1	E17.5_1	26562	6263	E17.5_1	42157	6485	10	10
TAACATACAATGTGGG-1_1	E17.5_1	68895	8201	E17.5_1	43732	7765	11	11
TAACCGCCCGCAGTGC-1_1	E17.5_1	40936	7939	E17.5_1	42518	7924	10	10
TAACTATCGAAGGTCC-1_1	E17.5_1	26107	5863	E17.5_1	43128	6082	2	2
TAACTCATCCGCGCGG-1_1	E17.5_1	66512	8200	E17.5_1	43848	7915	14	14
TAAGGAACTTGTGGGA-1_1	E17.5_1	9173	3510	E17.5_1	42772	6750	26	26
TAAGGCAACATAAGAT-1_1	E17.5_1	35196	6750	E17.5_1	42563	6750	2	2
TAAGTAACATCTTGAC-1_1	E17.5_1	55228	7686	E17.5_1	44279	7664	7	7
TAATACACAGTAGTAT-1_1	E17.5_1	45159	7364	E17.5_1	44180	7355	8	8
TAATATTGAAATTCGC-1_1	E17.5_1	24323	6129	E17.5_1	42676	6467	22	22
TACAACGCACAACTCA-1_1	E17.5_1	68375	8255	E17.5_1	43829	7890	14	14
TACAAGCTGTTCACTG-1_1	E17.5_1	11904	4187	E17.5_1	41615	6745	27	27
TACAAGTCTCGTGCAT-1_1	E17.5_1	62130	8229	E17.5_1	44133	8080	2	2
TACATAGGCATACACC-1_1	E17.5_1	59893	8155	E17.5_1	44255	8067	13	13
TACATTTCTAACGTGC-1_1	E17.5_1	53442	7744	E17.5_1	44397	7730	11	11
TACCAGAAGTAGGTTC-1_1	E17.5_1	50044	7692	E17.5_1	44509	7690	3	3
TACCGGCTCACTGCCC-1_1	E17.5_1	51023	7789	E17.5_1	44537	7784	13	13
TACCGTGCCTCGGACC-1_1	E17.5_1	34753	6516	E17.5_1	42722	6516	0	0
TACCTCACGCTTGTAC-1_1	E17.5_1	25974	6177	E17.5_1	42464	6437	16	16
TACGAACACGACTTCA-1_1	E17.5_1	24192	6123	E17.5_1	42429	6422	12	12
TACGACGCTTGCTGCG-1_1	E17.5_1	55281	7697	E17.5_1	44295	7667	11	11
TACGACTGCCTCTTAG-1_1	E17.5_1	47777	7694	E17.5_1	44498	7693	28	28
TACGAGAACTTCACGT-1_1	E17.5_1	32122	6562	E17.5_1	42701	6575	18	18
TACGATGTTGATCATC-1_1	E17.5_1	42717	7190	E17.5_1	43160	7186	4	4
TACGCAGTTCTTTCCT-1_1	E17.5_1	44701	7433	E17.5_1	44049	7432	21	21
TACGCCATATTCTAAT-1_1	E17.5_1	60865	8241	E17.5_1	44234	8148	13	13
TACGCCTCCATTCCGA-1_1	E17.5_1	27013	5836	E17.5_1	43127	5994	0	0
TACGTTTACCGGCAAT-1_1	E17.5_1	37058	6979	E17.5_1	42555	6973	2	2
TAGAAACCACTAAGTA-1_1	E17.5_1	69201	7746	E17.5_1	44884	7034	29	29
TAGAGTCTAAGCGAAC-1_1	E17.5_1	21876	5740	E17.5_1	42451	6268	5	5
TAGATATGGACTGGAA-1_1	E17.5_1	53970	7665	E17.5_1	44336	7647	11	11
TAGCGTTGGGTCTTAC-1_1	E17.5_1	56557	7836	E17.5_1	44262	7790	24	24
TAGCTAAGTCCGGGAG-1_1	E17.5_1	33732	6857	E17.5_1	42430	6857	12	12
TAGCTAGAAGGCATGA-1_1	E17.5_1	55367	7673	E17.5_1	44202	7653	23	23
TAGCTCGCCTGATAAC-1_1	E17.5_1	43737	7234	E17.5_1	43672	7230	11	11
TAGGGTGTTTCAAGAG-1_1	E17.5_1	11192	3826	E17.5_1	43133	6534	12	12
TAGGTGAGCCCTACTC-1_1	E17.5_1	41121	7004	E17.5_1	42804	7002	4	4
TAGGTTCGAGTTCGTC-1_1	E17.5_1	59476	8028	E17.5_1	44148	7942	21	21
TAGTCCGCAGAGAATG-1_1	E17.5_1	59406	8061	E17.5_1	44172	7979	11	11
TAGTCTAACAACGAGA-1_1	E17.5_1	44174	7285	E17.5_1	43816	7280	2	2
TAGTGAGAAGTGGTTG-1_1	E17.5_1	7244	3123	E17.5_1	41569	7025	8	8
TAGTGCCCTCCAGAGT-1_1	E17.5_1	26580	6399	E17.5_1	42461	6537	12	12
TATACACAGACGCCTT-1_1	E17.5_1	38035	6904	E17.5_1	42558	6903	0	0
TATCCATATCATGCGA-1_1	E17.5_1	22145	5801	E17.5_1	42543	6298	8	8
TATCGATGATTAAACG-1_1	E17.5_1	29335	6455	E17.5_1	42529	6518	5	5
TATCTACCACAGCGGG-1_1	E17.5_1	57733	8102	E17.5_1	44303	8049	13	13
TATGGATGTGCTACGC-1_1	E17.5_1	27869	6485	E17.5_1	42299	6594	5	5
TATGGCCCGGCCTCGC-1_1	E17.5_1	54954	7892	E17.5_1	44353	7864	2	2
TATGGGACCGAGCAGG-1_1	E17.5_1	67000	8350	E17.5_1	43893	8027	24	24
TATGGGTACGTATCGT-1_1	E17.5_1	37688	7315	E17.5_1	42429	7313	9	9
TATGGTCTGAGTAACA-1_1	E17.5_1	67803	8433	E17.5_1	43935	8081	24	24
TATTCCACTCAGCTCG-1_1	E17.5_1	37334	6902	E17.5_1	42574	6897	11	11
TATTCGTGCCAGAATA-1_1	E17.5_1	64930	8106	E17.5_1	43853	7853	14	14
TATTTAGTCTAGATCG-1_1	E17.5_1	22960	5761	E17.5_1	42628	6199	12	12
TATTTGTTACCCTTTA-1_1	E17.5_1	47725	7574	E17.5_1	44495	7564	30	30
TCAACCATGTTCGGGC-1_1	E17.5_1	21051	5615	E17.5_1	42737	6252	12	12
TCAACGAGGAGACAAA-1_1	E17.5_1	68299	8326	E17.5_1	43910	7961	11	11
TCACAGCAAACTCGAA-1_1	E17.5_1	65309	8066	E17.5_1	43830	7804	23	23
TCACAGGTTATTGGGC-1_1	E17.5_1	39047	7139	E17.5_1	42550	7136	18	18
TCACCCTCTTAAGATT-1_1	E17.5_1	54599	7872	E17.5_1	44385	7854	11	11
TCACGCATTGTAGATC-1_1	E17.5_1	49751	7699	E17.5_1	44548	7696	18	18
TCACGGTCATCGCACA-1_1	E17.5_1	40155	6967	E17.5_1	42679	6959	18	18
TCACGTGCCCGATTCA-1_1	E17.5_1	66309	8315	E17.5_1	43998	8026	24	24
TCAGACGCTATAGAAG-1_1	E17.5_1	43807	7103	E17.5_1	43694	7100	0	0
TCAGGGTGTAACGTAA-1_1	E17.5_1	67197	8350	E17.5_1	43913	7980	15	15
TCAGGTTCTTTGAGAA-1_1	E17.5_1	43533	7550	E17.5_1	43529	7546	4	4
TCAGTACTGACCCGCG-1_1	E17.5_1	36891	7060	E17.5_1	42462	7057	9	9
TCAGTAGGGACTATAA-1_1	E17.5_1	54227	8228	E17.5_1	44600	8212	3	3
TCAGTTACGGAATGAT-1_1	E17.5_1	13045	3981	E17.5_1	42202	6340	29	29
TCCAACTTTAAATTCT-1_1	E17.5_1	79272	8610	E17.5_1	43569	7720	11	11
TCCACAATGGTTTACG-1_1	E17.5_1	33122	6190	E17.5_1	42896	6200	4	4
TCCAGAGCACCGGTTC-1_1	E17.5_1	54066	7811	E17.5_1	44363	7792	0	0
TCCAGGCGAGTACGGT-1_1	E17.5_1	35942	7080	E17.5_1	42454	7078	9	9
TCCCAGCTTTAGTCTG-1_1	E17.5_1	41284	7560	E17.5_1	42738	7558	21	21
TCCCAGGCTTAGCTAA-1_1	E17.5_1	19880	5478	E17.5_1	42336	6239	12	12
TCCCGCGTACTCCTGG-1_1	E17.5_1	53857	7669	E17.5_1	44347	7650	15	15
TCCCGGGTGTGCTGCT-1_1	E17.5_1	49433	7365	E17.5_1	44423	7360	4	4
TCCCTGGCTCGCTGGA-1_1	E17.5_1	23206	5637	E17.5_1	43279	6059	2	2
TCCGATGGTGCGACAT-1_1	E17.5_1	29215	6463	E17.5_1	42444	6543	5	5
TCCGCTTATCCCATTA-1_1	E17.5_1	36886	6870	E17.5_1	42522	6868	13	13
TCCGGTTCGTCCGGTC-1_1	E17.5_1	41395	7217	E17.5_1	42818	7212	3	3
TCCTAAATTGGGAAGC-1_1	E17.5_1	31490	6205	E17.5_1	42935	6238	0	0
TCCTAGCAAAGAAGCT-1_1	E17.5_1	62997	8100	E17.5_1	43920	7959	23	23
TCCTCTACGAGATGGC-1_1	E17.5_1	20563	5329	E17.5_1	43317	6049	2	2
TCCTGCGTTGATACTC-1_1	E17.5_1	40656	6934	E17.5_1	42793	6931	2	2
TCCTTTCTTACGCTTA-1_1	E17.5_1	63557	8371	E17.5_1	44131	8200	2	2
TCGAAATTTAGGACCA-1_1	E17.5_1	45397	7562	E17.5_1	44187	7558	4	4
TCGAGACCAACACCGT-1_1	E17.5_1	65477	8176	E17.5_1	43898	7889	24	24
TCGATAGGCTAGTCGC-1_1	E17.5_1	36339	7652	E17.5_1	42145	7648	10	10
TCGCAAAGATGCATTT-1_1	E17.5_1	48240	7373	E17.5_1	44411	7366	0	0
TCGCCGAAGTTGCGTC-1_1	E17.5_1	38465	6497	E17.5_1	42731	6496	7	7
TCGCCGGTCGATCCGT-1_1	E17.5_1	29095	6575	E17.5_1	42468	6676	16	16
TCGCGTCCAGAAGGTC-1_1	E17.5_1	42561	6960	E17.5_1	43134	6956	4	4
TCGCTCGATATATTCC-1_1	E17.5_1	45699	7723	E17.5_1	44282	7721	2	2
TCGCTGGGCGGATTGT-1_1	E17.5_1	68094	8131	E17.5_1	43722	7712	15	15
TCGGAATGACCATCAA-1_1	E17.5_1	52035	7413	E17.5_1	44839	7380	29	29
TCGGAATGCGCTCTGA-1_1	E17.5_1	32715	6386	E17.5_1	42787	6405	2	2
TCGGCTAACTTCCCTT-1_1	E17.5_1	35365	6394	E17.5_1	42239	6404	29	29
TCGGGCACTTCTGGAT-1_1	E17.5_1	15290	4911	E17.5_1	41972	6565	8	8
TCGTGTACTATGGATG-1_1	E17.5_1	821	552	E17.5_1	43378	7994	17	17
TCGTTAGGAGTCCCTA-1_1	E17.5_1	41781	7105	E17.5_1	42914	7104	3	3
TCTACCGTCCACAAGC-1_1	E17.5_1	36812	6830	E17.5_1	42599	6828	15	15
TCTAGCATCTTCGATG-1_1	E17.5_1	33683	6844	E17.5_1	42586	6852	26	26
TCTAGCATGCCCAGAA-1_1	E17.5_1	60836	8007	E17.5_1	44065	7902	13	13
TCTAGTTATCAGAAGA-1_1	E17.5_1	57207	8218	E17.5_1	44391	8178	21	21
TCTCTAATAGCTGGTA-1_1	E17.5_1	29530	6379	E17.5_1	42424	6467	5	5
TCTGGGTAGCGCTCAT-1_1	E17.5_1	44005	6932	E17.5_1	43753	6932	14	14
TCTGTCATACAAGAGC-1_1	E17.5_1	17046	4979	E17.5_1	42759	6286	8	8
TCTGTGGCTACATTTC-1_1	E17.5_1	33182	7110	E17.5_1	42180	7148	10	10
TCTTACAGAGGTACCG-1_1	E17.5_1	40121	7732	E17.5_1	42464	7717	22	22
TCTTATGGGTAGTACC-1_1	E17.5_1	33190	6816	E17.5_1	41972	6849	27	27
TCTTCGAATAGACGTT-1_1	E17.5_1	59159	7906	E17.5_1	44081	7821	11	11
TGACCCACGTTAGACA-1_1	E17.5_1	51820	7844	E17.5_1	44547	7839	18	18
TGACTATAATCCTTTC-1_1	E17.5_1	55760	7898	E17.5_1	44316	7870	13	13
TGAGAATGCTTTACCG-1_1	E17.5_1	30705	6605	E17.5_1	42394	6658	5	5
TGAGCCATACAGTCTC-1_1	E17.5_1	43547	6995	E17.5_1	43542	6990	7	7
TGAGCGGAAAGTGTTC-1_1	E17.5_1	23161	5506	E17.5_1	43400	5915	0	0
TGAGTAAATTAGCGTA-1_1	E17.5_1	58136	7925	E17.5_1	44158	7858	11	11
TGAGTGCCTCTTAAAT-1_1	E17.5_1	58431	7818	E17.5_1	44135	7746	7	7
TGATCGGTTTGACCCT-1_1	E17.5_1	20590	5687	E17.5_1	42197	6327	5	5
TGATCTCCGGCGCCAG-1_1	E17.5_1	19396	5270	E17.5_1	42889	6150	12	12
TGATTCGTCTATCACT-1_1	E17.5_1	54861	7811	E17.5_1	44322	7789	4	4
TGATTCTGTCGCCGGT-1_1	E17.5_1	59516	7828	E17.5_1	43993	7712	7	7
TGATTTATTAGCTGTG-1_1	E17.5_1	42438	7398	E17.5_1	43039	7393	2	2
TGCAGAGTACCGAGCA-1_1	E17.5_1	71269	8374	E17.5_1	43709	7847	14	14
TGCCAATGGGTACTCT-1_1	E17.5_1	35865	6892	E17.5_1	42529	6885	0	0
TGCCAGTACGTGGAGA-1_1	E17.5_1	36560	6695	E17.5_1	42576	6692	0	0
TGCCCGTACCGTTAAA-1_1	E17.5_1	56732	7953	E17.5_1	44255	7903	0	0
TGCCGTGGATCGTCCT-1_1	E17.5_1	22341	5340	E17.5_1	43494	5884	17	17
TGCGACACCCTAGTGC-1_1	E17.5_1	52283	7684	E17.5_1	44435	7675	3	3
TGCGAGAATATTACCC-1_1	E17.5_1	14111	4170	E17.5_1	43835	6155	17	17
TGCGCGATTAACGGAG-1_1	E17.5_1	42126	7380	E17.5_1	42960	7377	4	4
TGCGGGTATTGGGATC-1_1	E17.5_1	42650	7446	E17.5_1	43085	7443	5	5
TGCGTAAGAACCTGAT-1_1	E17.5_1	59589	8009	E17.5_1	44132	7906	3	3
TGCTATACAAACGGAC-1_1	E17.5_1	36449	7413	E17.5_1	42127	7409	10	10
TGCTGTTGAAGAACTC-1_1	E17.5_1	71442	8374	E17.5_1	43792	7864	24	24
TGGAAGAAGGGAACGT-1_1	E17.5_1	41263	7245	E17.5_1	42811	7241	2	2
TGGAAGACGAACACCA-1_1	E17.5_1	28164	6575	E17.5_1	42325	6699	22	22
TGGAGCTAAAGTTCCC-1_1	E17.5_1	39626	7753	E17.5_1	42297	7742	16	16
TGGAGTGATGCGATGA-1_1	E17.5_1	44792	7486	E17.5_1	44071	7481	4	4
TGGCAGATTACGATCA-1_1	E17.5_1	54441	7847	E17.5_1	44397	7816	11	11
TGGCAGCAGTAATAGT-1_1	E17.5_1	65513	8210	E17.5_1	43944	7941	24	24
TGGCCAAACTGAAGTA-1_1	E17.5_1	68005	8268	E17.5_1	43774	7863	15	15
TGGCCGTATATTGACC-1_1	E17.5_1	25815	5761	E17.5_1	43188	5988	4	4
TGGCGATCAAGTTATG-1_1	E17.5_1	50972	7593	E17.5_1	44484	7590	23	23
TGGCGGTGTGCGATTG-1_1	E17.5_1	16765	5016	E17.5_1	42375	6382	8	8
TGGCTTTGGGTAGACA-1_1	E17.5_1	18898	5251	E17.5_1	42601	6209	22	22
TGGGCACAAACAGAAC-1_1	E17.5_1	34207	7151	E17.5_1	42196	7164	10	10
TGGTCCCACGCTACGG-1_1	E17.5_1	22043	5375	E17.5_1	43351	5891	0	0
TGGTCTGTTGGGCGTA-1_1	E17.5_1	10224	3531	E17.5_1	43653	6571	2	2
TGGTTCAACGGGTAAT-1_1	E17.5_1	39324	7064	E17.5_1	42617	7061	0	0
TGGTTCGTAGCAAAGG-1_1	E17.5_1	28800	6409	E17.5_1	42413	6505	12	12
TGTACGAACAAATCCG-1_1	E17.5_1	85123	8846	E17.5_1	43693	7808	24	24
TGTACTGTGCCAAAGT-1_1	E17.5_1	15219	4767	E17.5_1	42284	6482	8	8
TGTAGTGATCTATAAT-1_1	E17.5_1	45745	7228	E17.5_1	44207	7226	4	4
TGTATCCTTATTCCAT-1_1	E17.5_1	27667	6707	E17.5_1	41841	6857	25	25
TGTCCTAAGTCACCGC-1_1	E17.5_1	44586	7068	E17.5_1	43975	7065	4	4
TGTCTACAGTTTCTGT-1_1	E17.5_1	33244	6906	E17.5_1	42137	6925	10	10
TGTGGAGGAAGCTTAA-1_1	E17.5_1	32257	7166	E17.5_1	42118	7204	10	10
TGTGTCGCGAGTTGCA-1_1	E17.5_1	24390	5887	E17.5_1	42662	6242	9	9
TGTTCCGCTTCCATGA-1_1	E17.5_1	82406	8444	E17.5_1	43140	7321	14	14
TGTTCGTATTGCGGTG-1_1	E17.5_1	39566	7116	E17.5_1	42614	7115	13	13
TGTTCTTCCATTGACT-1_1	E17.5_1	35789	6819	E17.5_1	42604	6817	18	18
TGTTTCGGTACTTCTC-1_1	E17.5_1	32420	6680	E17.5_1	42442	6711	5	5
TTAAACCGGTAGCGAC-1_1	E17.5_1	46458	8476	E17.5_1	44597	8468	10	10
TTAACCAACCCTCCCT-1_1	E17.5_1	36716	6994	E17.5_1	42380	6993	5	5
TTAAGCGCCTGACCCA-1_1	E17.5_1	53693	8004	E17.5_1	44497	7991	4	4
TTAATGCGAGGTAACT-1_1	E17.5_1	36508	7160	E17.5_1	42287	7155	5	5
TTAATGTAGACCAGGT-1_1	E17.5_1	73671	8660	E17.5_1	43955	8083	2	2
TTACAACTACGCATCC-1_1	E17.5_1	16470	4831	E17.5_1	42915	6199	12	12
TTACCATTGATTACCC-1_1	E17.5_1	26961	5938	E17.5_1	43073	6103	2	2
TTACTGGGATATTTCA-1_1	E17.5_1	60273	7988	E17.5_1	44127	7894	11	11
TTAGAAGAACATGACT-1_1	E17.5_1	40263	7094	E17.5_1	42690	7091	0	0
TTATAGATGCACATTA-1_1	E17.5_1	46964	8371	E17.5_1	44692	8344	10	10
TTATATTTGGCAATCC-1_1	E17.5_1	42625	7276	E17.5_1	43123	7272	15	15
TTATCTGTATCATAAC-1_1	E17.5_1	45996	7644	E17.5_1	44351	7638	8	8
TTATGAATGAAAGGGA-1_1	E17.5_1	65946	8420	E17.5_1	44077	8166	28	28
TTATGACAAACTGGAT-1_1	E17.5_1	48519	7331	E17.5_1	44422	7329	4	4
TTATGCGTCCCGGTCC-1_1	E17.5_1	23148	5894	E17.5_1	42430	6338	8	8
TTATTAGAGCGTGTTC-1_1	E17.5_1	52298	7719	E17.5_1	44462	7712	13	13
TTATTAGGGAAGCATC-1_1	E17.5_1	29548	6355	E17.5_1	42558	6464	5	5
TTCAACGACCCGACCG-1_1	E17.5_1	21819	5561	E17.5_1	42832	6097	22	22
TTCACGAAAGGATCAC-1_1	E17.5_1	65275	8233	E17.5_1	43958	8011	23	23
TTCACTCGAGCACCTA-1_1	E17.5_1	22610	5443	E17.5_1	43312	5867	0	0
TTCCAATCTGGCTATC-1_1	E17.5_1	50601	7601	E17.5_1	44455	7598	3	3
TTCCACACAGATTTGA-1_1	E17.5_1	51973	7587	E17.5_1	44427	7583	7	7
TTCCACATTTCTCGTC-1_1	E17.5_1	7707	2682	E17.5_1	42190	6812	29	29
TTCCGCGTGAGGCGAT-1_1	E17.5_1	57344	8121	E17.5_1	44328	8076	13	13
TTCCTCGAGGGTGTCT-1_1	E17.5_1	23141	5821	E17.5_1	42563	6235	9	9
TTCGACAGAGCCCGTG-1_1	E17.5_1	26758	5894	E17.5_1	43164	6064	0	0
TTCGACGGGAAGGGCG-1_1	E17.5_1	11441	3921	E17.5_1	43158	6514	18	18
TTCGCACTCGCGTGCT-1_1	E17.5_1	44165	7483	E17.5_1	43847	7478	30	30
TTCGTACTCCAGAACG-1_1	E17.5_1	52323	7810	E17.5_1	44478	7806	2	2
TTCTAGGCCAATTGTG-1_1	E17.5_1	22825	5613	E17.5_1	42848	6163	9	9
TTCTGCCGCGCCTAGA-1_1	E17.5_1	43682	7202	E17.5_1	43654	7199	13	13
TTCTTCCCTTTGATAT-1_1	E17.5_1	36657	7078	E17.5_1	42316	7081	5	5
TTCTTGAGCCGCGCTA-1_1	E17.5_1	46908	7269	E17.5_1	44349	7266	7	7
TTGAAGAATTCCCAGG-1_1	E17.5_1	33613	6878	E17.5_1	42479	6882	12	12
TTGACGATTCAGCACG-1_1	E17.5_1	36352	7671	E17.5_1	42090	7663	10	10
TTGACTACCATATGGT-1_1	E17.5_1	56840	7824	E17.5_1	44236	7792	0	0
TTGAGAGTACTGCTAA-1_1	E17.5_1	42783	6952	E17.5_1	43197	6945	7	7
TTGATCTAACTTTGTC-1_1	E17.5_1	30439	6666	E17.5_1	42592	6709	26	26
TTGATTATGCAGATGA-1_1	E17.5_1	33975	6566	E17.5_1	42717	6572	4	4
TTGCACAATTCAGAAA-1_1	E17.5_1	70236	8414	E17.5_1	43914	7959	11	11
TTGCACGGAGCAGCAC-1_1	E17.5_1	30950	6593	E17.5_1	42472	6640	5	5
TTGCATGCTGATCACG-1_1	E17.5_1	46540	7312	E17.5_1	44302	7308	17	17
TTGCCCTGATCACGGG-1_1	E17.5_1	51619	7690	E17.5_1	44416	7684	4	4
TTGCTGAAGGAACCAC-1_1	E17.5_1	18809	5173	E17.5_1	42689	6167	12	12
TTGCTGATCATGTTCG-1_1	E17.5_1	40631	7538	E17.5_1	42620	7537	21	21
TTGGAGTCTCCCTTCT-1_1	E17.5_1	18492	5266	E17.5_1	42484	6349	8	8
TTGGATATCGTCTACG-1_1	E17.5_1	52059	7630	E17.5_1	44445	7628	14	14
TTGGATTGGGTACCAC-1_1	E17.5_1	20787	5665	E17.5_1	42432	6339	16	16
TTGGCTCGCATGAGAC-1_1	E17.5_1	17055	4865	E17.5_1	43094	6177	9	9
TTGGGACACTGCCCGC-1_1	E17.5_1	37419	6745	E17.5_1	42617	6742	15	15
TTGGGCGGCGGTTGCC-1_1	E17.5_1	62485	8054	E17.5_1	43970	7879	15	15
TTGGTCACACTCGTAA-1_1	E17.5_1	50667	7481	E17.5_1	44476	7478	3	3
TTGTAATCCGTACTCG-1_1	E17.5_1	56418	8073	E17.5_1	44357	8041	14	14
TTGTCGTTCAGTTACC-1_1	E17.5_1	31854	6722	E17.5_1	42465	6765	5	5
TTGTGGCCCTGACAGT-1_1	E17.5_1	29830	6507	E17.5_1	42523	6590	5	5
TTGTGTATGCCACCAA-1_1	E17.5_1	20834	5195	E17.5_1	43437	5885	0	0
TTGTGTTTCCCGAAAG-1_1	E17.5_1	37513	6894	E17.5_1	42581	6893	11	11
TTGTTTGTGTAAATTC-1_1	E17.5_1	70989	9514	E17.5_1	45864	8879	10	10
AAACTGCTGGCTCCAA-1_2	E17.5_2	58261	7759	E17.5_2	48112	7739	1	1
AAAGACCCAAGTCGCG-1_2	E17.5_2	26874	6185	E17.5_2	46843	6558	16	16
AAAGTCACTGATGTAA-1_2	E17.5_2	30484	6941	E17.5_2	46367	7075	22	22
AAATACCTATAAGCAT-1_2	E17.5_2	55059	7753	E17.5_2	48300	7746	0	0
AAATCGTGTACCACAA-1_2	E17.5_2	64596	7902	E17.5_2	47678	7824	23	23
AAATGGTCAATGTGCC-1_2	E17.5_2	85838	8677	E17.5_2	46720	7878	3	3
AAATGTGGGTGCTCCT-1_2	E17.5_2	29771	6580	E17.5_2	46597	6802	16	16
AAATTAACGGGTAGCT-1_2	E17.5_2	82222	8498	E17.5_2	46891	7890	1	1
AACAGGAAATCGAATA-1_2	E17.5_2	27961	6385	E17.5_2	46951	6640	8	8
AACGATAGAAGGGCCG-1_2	E17.5_2	40281	7025	E17.5_2	46676	7014	26	26
AACGATATGTCAACTG-1_2	E17.5_2	54203	7721	E17.5_2	48313	7713	15	15
AACGTCAGACTAGTGG-1_2	E17.5_2	51272	7321	E17.5_2	48217	7309	6	6
AACGTGCGAAAGTCTC-1_2	E17.5_2	80239	8537	E17.5_2	46964	7984	19	19
AACTCAAGTTAATTGC-1_2	E17.5_2	75363	8367	E17.5_2	47180	7976	7	7
AAGACTGCAAGCTACT-1_2	E17.5_2	70670	8300	E17.5_2	47516	8093	19	19
AAGAGCTCTTTATCGG-1_2	E17.5_2	35058	7057	E17.5_2	46724	7073	21	21
AAGCTCGTGCCAAGTC-1_2	E17.5_2	62693	7965	E17.5_2	47856	7912	19	19
AAGGAGAACTTATAAG-1_2	E17.5_2	30106	6633	E17.5_2	46566	6813	22	22
AAGGAGCGGTTGGTGC-1_2	E17.5_2	25691	5799	E17.5_2	47735	6163	2	2
AAGGCGCGTAAAGCTT-1_2	E17.5_2	41637	7076	E17.5_2	46740	7073	6	6
AAGGCTGTGCTCATCG-1_2	E17.5_2	47538	7606	E17.5_2	47511	7585	9	9
AAGTAGAAGACCGGGT-1_2	E17.5_2	33024	6442	E17.5_2	47203	6496	6	6
AATCGGGACACTACGA-1_2	E17.5_2	23440	5903	E17.5_2	46651	6506	5	5
AATGACGTAGGATGTC-1_2	E17.5_2	29995	6426	E17.5_2	47418	6538	0	0
AATGACTGTCAGCCGG-1_2	E17.5_2	51439	7685	E17.5_2	48304	7676	6	6
AATGCAACCGGGTACC-1_2	E17.5_2	42987	7600	E17.5_2	46561	7584	31	31
AATTAAAGGTCGGCGT-1_2	E17.5_2	65418	8143	E17.5_2	47685	8046	3	3
ACAAATGGTAGTGTTT-1_2	E17.5_2	4340	1938	E17.5_2	50513	7274	17	17
ACAACAGCATGAGCTA-1_2	E17.5_2	73583	8131	E17.5_2	47212	7829	19	19
ACAAGGAAATCCGCCC-1_2	E17.5_2	47536	7078	E17.5_2	47529	7071	0	0
ACAAGGACAAGAGGTT-1_2	E17.5_2	51379	7538	E17.5_2	48245	7529	6	6
ACAAGGGCAGGCTCTG-1_2	E17.5_2	42492	7074	E17.5_2	46755	7071	0	0
ACAATCGATCTTTATA-1_2	E17.5_2	17473	5058	E17.5_2	45874	6526	25	25
ACACAAAGACGGGTGG-1_2	E17.5_2	31549	6744	E17.5_2	46768	6846	9	9
ACACACTTTCTACACG-1_2	E17.5_2	21497	5634	E17.5_2	46988	6467	16	16
ACACCTTAAGTAGGGC-1_2	E17.5_2	56186	7538	E17.5_2	48124	7528	6	6
ACACGAGACTCCTTCT-1_2	E17.5_2	71527	8160	E17.5_2	47312	7926	19	19
ACAGATTAGGTTAGTG-1_2	E17.5_2	21628	5496	E17.5_2	46851	6388	16	16
ACATAATAAGGCGGTG-1_2	E17.5_2	35217	6911	E17.5_2	46449	6947	5	5
ACATCGATCGTTTACC-1_2	E17.5_2	45904	7205	E17.5_2	47005	7200	1	1
ACCACAAGTTTCTATC-1_2	E17.5_2	73254	8160	E17.5_2	47159	7826	1	1
ACCACGTGCAGCTATA-1_2	E17.5_2	42308	7022	E17.5_2	46763	7017	0	0
ACCAGGAGTGTGATCT-1_2	E17.5_2	28548	6643	E17.5_2	46494	6860	22	22
ACCATATCCGCAATAA-1_2	E17.5_2	70319	8324	E17.5_2	47442	8089	1	1
ACCCGGTTACACTTCC-1_2	E17.5_2	58310	7676	E17.5_2	48014	7662	7	7
ACCGAAAGGGCCCTGC-1_2	E17.5_2	30162	6772	E17.5_2	46455	6945	22	22
ACCGACTGAGTCCCAC-1_2	E17.5_2	47894	7564	E17.5_2	47715	7558	18	18
ACCTTTCCTTTAGAAG-1_2	E17.5_2	13199	4265	E17.5_2	45700	6613	25	25
ACGATACATAGAACTA-1_2	E17.5_2	2699	1396	E17.5_2	48934	7532	18	18
ACGATGCATATGTTAT-1_2	E17.5_2	67564	8000	E17.5_2	47443	7832	7	7
ACGCATTCGTGAGTAC-1_2	E17.5_2	68695	8377	E17.5_2	47608	8222	1	1
ACGCCGCTAGACGACC-1_2	E17.5_2	51225	7620	E17.5_2	48303	7611	20	20
ACGCGGGCCAAGGACA-1_2	E17.5_2	70101	8358	E17.5_2	47560	8187	1	1
ACGTAGATTGCTGATG-1_2	E17.5_2	76947	8508	E17.5_2	47248	8088	19	19
ACGTCCTAAACGAGAT-1_2	E17.5_2	20278	6276	E17.5_2	45423	7109	10	10
ACGTGCGCCTCGTGCA-1_2	E17.5_2	17689	4956	E17.5_2	46809	6380	5	5
ACGTTAATGTCGAAGA-1_2	E17.5_2	59042	8079	E17.5_2	48178	8057	20	20
ACGTTCCGCGCTCCGT-1_2	E17.5_2	29658	6462	E17.5_2	46635	6702	16	16
ACGTTTAGTTGTGATC-1_2	E17.5_2	19068	5338	E17.5_2	46931	6481	8	8
ACTACCAGCTCTCTGG-1_2	E17.5_2	51691	7430	E17.5_2	48250	7422	6	6
ACTCCCTAGAATAGTA-1_2	E17.5_2	45681	7127	E17.5_2	46977	7121	0	0
ACTCTCTGACTTAGGT-1_2	E17.5_2	19021	5081	E17.5_2	48272	6215	0	0
ACTCTTGTATAGTAAC-1_2	E17.5_2	75407	8527	E17.5_2	47303	8175	20	20
ACTGTAGCACTTTGGA-1_2	E17.5_2	49378	7233	E17.5_2	48057	7229	6	6
ACTGTCCAGGATTATA-1_2	E17.5_2	71185	8309	E17.5_2	47384	8062	1	1
ACTGTCTTCTTTAGAA-1_2	E17.5_2	65890	8244	E17.5_2	47716	8131	21	21
ACTTATTAGGATCGGT-1_2	E17.5_2	42304	7020	E17.5_2	46770	7017	3	3
ACTTGACTCCCTCTTT-1_2	E17.5_2	46623	7351	E17.5_2	47136	7346	20	20
ACTTGCCATATTGTAC-1_2	E17.5_2	24965	6154	E17.5_2	46385	6637	22	22
ACTTGGGACCCGGTGG-1_2	E17.5_2	50264	7463	E17.5_2	48199	7458	18	18
ACTTTCCTATAGCTTC-1_2	E17.5_2	46185	7664	E17.5_2	46988	7653	18	18
AGAAGGTTGCCGAATT-1_2	E17.5_2	39366	6834	E17.5_2	46814	6828	17	17
AGACCCGCCCTCCTCG-1_2	E17.5_2	39197	7337	E17.5_2	46590	7328	18	18
AGACTAGCCTTCCAGA-1_2	E17.5_2	37764	6770	E17.5_2	46908	6765	6	6
AGAGCGGGCTAATCAT-1_2	E17.5_2	23720	5735	E17.5_2	46975	6338	5	5
AGATAACTTCAGGGCC-1_2	E17.5_2	45232	7634	E17.5_2	46832	7622	9	9
AGATTATAGGACGTTT-1_2	E17.5_2	65822	8073	E17.5_2	47668	7972	3	3
AGCACCAGTACTCACG-1_2	E17.5_2	34531	6831	E17.5_2	46828	6853	9	9
AGCACTTAAGGACGCC-1_2	E17.5_2	56172	7747	E17.5_2	48277	7739	2	2
AGCCCTAAGCGAAGTT-1_2	E17.5_2	19576	5347	E17.5_2	46867	6421	16	16
AGCGACCAACGATATT-1_2	E17.5_2	23676	5655	E17.5_2	47732	6225	9	9
AGCGTGGTATTCTACT-1_2	E17.5_2	46463	7211	E17.5_2	47107	7208	0	0
AGCTCTAGACGTTCCA-1_2	E17.5_2	41916	7118	E17.5_2	46748	7109	0	0
AGCTCTTTACTCAGTT-1_2	E17.5_2	57149	7625	E17.5_2	48079	7611	7	7
AGGACGACCCATTAGA-1_2	E17.5_2	26032	5794	E17.5_2	47826	6187	17	17
AGGCCACCCGTTATGA-1_2	E17.5_2	43397	6890	E17.5_2	46840	6888	6	6
AGGGCTGCAGTTACAG-1_2	E17.5_2	69143	8235	E17.5_2	47558	8040	19	19
AGGGTTTAGTTCGGGA-1_2	E17.5_2	67396	8218	E17.5_2	47582	8077	1	1
AGGTTGAGGCACGCTT-1_2	E17.5_2	14046	4096	E17.5_2	48816	6304	15	15
AGGTTTCACACACCTT-1_2	E17.5_2	46295	7287	E17.5_2	47038	7281	20	20
AGTACGGGCACCTGGC-1_2	E17.5_2	66427	8420	E17.5_2	47945	8306	15	15
AGTATAATACTAGGCA-1_2	E17.5_2	20062	5093	E17.5_2	47898	6102	2	2
AGTCAACACCACCATC-1_2	E17.5_2	64854	7944	E17.5_2	47591	7835	7	7
AGTCGGCCCAAACGAC-1_2	E17.5_2	53614	7547	E17.5_2	48281	7538	6	6
AGTCTTCTCCTCAAAT-1_2	E17.5_2	19091	5264	E17.5_2	47174	6424	9	9
AGTGACCTACTTTACG-1_2	E17.5_2	53264	7486	E17.5_2	48257	7480	7	7
AGTGATATGAGTAGTT-1_2	E17.5_2	26570	5819	E17.5_2	47829	6145	17	17
AGTTAAACACTTGCGA-1_2	E17.5_2	67539	8091	E17.5_2	47432	7920	7	7
AGTTCCTACAGAATTA-1_2	E17.5_2	64430	8076	E17.5_2	47704	7988	1	1
AGTTCCTATTTATGTT-1_2	E17.5_2	45998	7274	E17.5_2	47005	7271	1	1
AGTTTCGCAGGTCGGA-1_2	E17.5_2	28587	6213	E17.5_2	46721	6477	5	5
ATAAACGGACCCGTAA-1_2	E17.5_2	55889	7805	E17.5_2	48242	7792	0	0
ATAAAGGCTCGGTCGT-1_2	E17.5_2	65822	8004	E17.5_2	47553	7890	3	3
ATAACGGAGTCCAACG-1_2	E17.5_2	54212	7797	E17.5_2	48342	7788	15	15
ATAAGTTACCGCGACG-1_2	E17.5_2	26870	5622	E17.5_2	48191	5995	17	17
ATAATAGCTGTTGAAT-1_2	E17.5_2	49064	7360	E17.5_2	48042	7352	23	23
ATACCAGGCTAATAGA-1_2	E17.5_2	29566	6541	E17.5_2	46399	6744	16	16
ATACGCCGGCGAAACC-1_2	E17.5_2	20730	5180	E17.5_2	48397	6101	17	17
ATACTAGCATGACCCT-1_2	E17.5_2	23153	5963	E17.5_2	46757	6563	9	9
ATAGACGAAGAGAAAG-1_2	E17.5_2	79252	8524	E17.5_2	47058	8003	1	1
ATAGAGTACTGGGACA-1_2	E17.5_2	51348	7654	E17.5_2	48300	7645	4	4
ATAGGGATATCCTTGA-1_2	E17.5_2	43518	7191	E17.5_2	46748	7182	15	15
ATAGGTTGGGCAGATG-1_2	E17.5_2	47233	7627	E17.5_2	47352	7621	18	18
ATAGTGAAGCGTTCTC-1_2	E17.5_2	61260	7831	E17.5_2	47852	7791	1	1
ATATCTTAGGGCCTTC-1_2	E17.5_2	57025	7705	E17.5_2	48132	7692	1	1
ATATTTAACCCTCAAG-1_2	E17.5_2	70940	8250	E17.5_2	47388	8015	1	1
ATCAATCTGGGCTGCA-1_2	E17.5_2	68501	8160	E17.5_2	47454	7997	19	19
ATCATCCAATATTTGT-1_2	E17.5_2	58179	7765	E17.5_2	48055	7749	1	1
ATCCAACGCAGTCATA-1_2	E17.5_2	46636	7288	E17.5_2	47149	7283	6	6
ATCCAGGATTCGTGAA-1_2	E17.5_2	69850	8200	E17.5_2	47424	8020	7	7
ATCCTACCTAAGCTCT-1_2	E17.5_2	42664	6902	E17.5_2	46817	6896	0	0
ATCGACCCAATACAGA-1_2	E17.5_2	49101	7486	E17.5_2	48051	7477	1	1
ATCGCACGCCGGGAGA-1_2	E17.5_2	34869	7106	E17.5_2	46662	7128	12	12
ATCTGTAATTGTACCC-1_2	E17.5_2	18836	5270	E17.5_2	47006	6429	8	8
ATGAAGCCAAGGAGCC-1_2	E17.5_2	33668	6662	E17.5_2	47016	6704	6	6
ATGACGCCGGCTCTAA-1_2	E17.5_2	31252	6568	E17.5_2	46517	6706	5	5
ATGAGGAGTGTTAATC-1_2	E17.5_2	44262	7300	E17.5_2	46765	7286	6	6
ATGATGCAATGGTACA-1_2	E17.5_2	54167	7767	E17.5_2	48325	7759	0	0
ATGCATGATCCAGGAT-1_2	E17.5_2	30984	6617	E17.5_2	46614	6708	5	5
ATGCCGGTCTTGCATA-1_2	E17.5_2	23638	5590	E17.5_2	47942	6167	17	17
ATGCGACAGTCCCATT-1_2	E17.5_2	69789	8322	E17.5_2	47560	8137	19	19
ATGGAGCAGGCCGTGA-1_2	E17.5_2	70714	8411	E17.5_2	47552	8208	20	20
ATGGATTGACCAAACG-1_2	E17.5_2	33630	7028	E17.5_2	46485	7061	31	31
ATGTGCATCCGACGCA-1_2	E17.5_2	29511	6555	E17.5_2	46856	6729	9	9
ATGTGGACATCTTGAT-1_2	E17.5_2	45015	7176	E17.5_2	46869	7172	0	0
ATTAAACATGCGGACC-1_2	E17.5_2	58979	7808	E17.5_2	48070	7789	23	23
ATTAATGAACCAGTCG-1_2	E17.5_2	41984	7235	E17.5_2	46675	7229	2	2
ATTACTAGCCTCTTGC-1_2	E17.5_2	9586	3451	E17.5_2	48224	6835	9	9
ATTAGATTGATAGCGG-1_2	E17.5_2	33528	6752	E17.5_2	46919	6801	9	9
ATTAGGCGATGCTTTC-1_2	E17.5_2	69833	8442	E17.5_2	47562	8268	20	20
ATTATCTCGACAGATC-1_2	E17.5_2	24819	5727	E17.5_2	46908	6287	16	16
ATTATGCCATAGGGAG-1_2	E17.5_2	29766	6493	E17.5_2	47074	6629	9	9
ATTCATATACTGTCCA-1_2	E17.5_2	51740	7457	E17.5_2	48242	7453	1	1
ATTCCTCCGCCAGTGC-1_2	E17.5_2	27657	5998	E17.5_2	47786	6281	6	6
ATTCTCGTCTCTTTAG-1_2	E17.5_2	34215	6821	E17.5_2	46767	6851	26	26
ATTGAAGATCTTAGTG-1_2	E17.5_2	67858	8105	E17.5_2	47514	7953	1	1
ATTGCTGCTCCTCCAT-1_2	E17.5_2	66702	7849	E17.5_2	47411	7696	7	7
ATTGGGAATATCTTGG-1_2	E17.5_2	44818	7317	E17.5_2	46775	7302	26	26
ATTTACAGTTTACTGG-1_2	E17.5_2	51727	7400	E17.5_2	48262	7395	6	6
ATTTGCCTAGTTACGA-1_2	E17.5_2	16114	4967	E17.5_2	45760	6618	25	25
CAAACGGTCGCACTTT-1_2	E17.5_2	45165	7226	E17.5_2	46884	7220	6	6
CAAATGCGGAGTGTTC-1_2	E17.5_2	21047	5622	E17.5_2	46321	6581	8	8
CAAATGTCCTTCCGTG-1_2	E17.5_2	54947	7530	E17.5_2	48222	7521	7	7
CAACTCCTTGATCCCG-1_2	E17.5_2	9996	3429	E17.5_2	48473	6754	9	9
CAAGAGGGCGGAGTAC-1_2	E17.5_2	43235	6950	E17.5_2	46828	6945	0	0
CAAGCAACGTCGGAGT-1_2	E17.5_2	47184	7231	E17.5_2	47354	7227	6	6
CAAGCACCAAATGCCT-1_2	E17.5_2	24449	5909	E17.5_2	47047	6454	9	9
CAAGGATCGCATGTTC-1_2	E17.5_2	53879	7794	E17.5_2	48350	7784	20	20
CAAGTGAACTTTGGTT-1_2	E17.5_2	18904	5223	E17.5_2	46941	6475	8	8
CAATGGTCGGCCTGGG-1_2	E17.5_2	29612	6629	E17.5_2	46472	6844	22	22
CAATTAAGGGTGATGA-1_2	E17.5_2	58596	8094	E17.5_2	48236	8077	21	21
CAATTTCGTATAAGGG-1_2	E17.5_2	66165	8115	E17.5_2	47712	8002	1	1
CACAATGAGCTGCTAT-1_2	E17.5_2	66453	7897	E17.5_2	47438	7735	1	1
CACAGCACCCACGGCA-1_2	E17.5_2	65279	8029	E17.5_2	47714	7933	1	1
CACAGCTAGGGAGTGA-1_2	E17.5_2	29815	6553	E17.5_2	46762	6734	9	9
CACATATTAGCAGGAT-1_2	E17.5_2	36753	6746	E17.5_2	46995	6744	20	20
CACATGATTCAGCAAC-1_2	E17.5_2	58720	7897	E17.5_2	48126	7881	19	19
CACCGCCAGAAGGTTT-1_2	E17.5_2	31959	6968	E17.5_2	46526	7043	31	31
CACCTAATCAGTTTAC-1_2	E17.5_2	26697	5840	E17.5_2	47730	6177	2	2
CACGCAGCGAGGCTTT-1_2	E17.5_2	51293	7822	E17.5_2	48340	7811	2	2
CACTAAAGTTGCCTAT-1_2	E17.5_2	60081	7942	E17.5_2	48018	7917	3	3
CACTCAAGAGCTATGG-1_2	E17.5_2	61484	7880	E17.5_2	47835	7826	1	1
CACTCGAGCTGAACAA-1_2	E17.5_2	46563	7278	E17.5_2	47150	7273	0	0
CACTGTCCAAGTGAGA-1_2	E17.5_2	20059	5228	E17.5_2	47991	6290	2	2
CACTTAATCAGACGGA-1_2	E17.5_2	65655	8024	E17.5_2	47552	7892	3	3
CAGCCCTCACAGGCAG-1_2	E17.5_2	18593	5149	E17.5_2	46437	6483	8	8
CAGCCTCCTGCAGAGG-1_2	E17.5_2	47457	7364	E17.5_2	47454	7351	15	15
CAGCTCACTGAGACAT-1_2	E17.5_2	61288	7945	E17.5_2	47957	7904	1	1
CAGGATATATCGTTGT-1_2	E17.5_2	50653	7454	E17.5_2	48206	7449	1	1
CAGGCCGTTTGGGTGT-1_2	E17.5_2	61717	7733	E17.5_2	47720	7670	7	7
CAGGCGCCATGCTAGG-1_2	E17.5_2	51514	7306	E17.5_2	48213	7302	0	0
CAGTCTGTATACTGGG-1_2	E17.5_2	45583	7434	E17.5_2	46899	7428	1	1
CAGTTCAAATTGACAC-1_2	E17.5_2	60050	7922	E17.5_2	47999	7895	18	18
CATACGGCGTCTGGGC-1_2	E17.5_2	55365	7721	E17.5_2	48267	7712	1	1
CATACTATGTAATTGT-1_2	E17.5_2	59403	7872	E17.5_2	48107	7851	3	3
CATAGTAGCATAGTAG-1_2	E17.5_2	34385	6508	E17.5_2	47190	6550	6	6
CATATAGGTACAGTCA-1_2	E17.5_2	63686	7915	E17.5_2	47629	7825	1	1
CATCGGACGGGTTAAT-1_2	E17.5_2	62102	7754	E17.5_2	47782	7708	1	1
CATGCGTTAGACAGAA-1_2	E17.5_2	17035	4934	E17.5_2	46504	6440	5	5
CATGGCAGGAAGATCG-1_2	E17.5_2	31834	6477	E17.5_2	46588	6591	5	5
CATGGTAAGTAGCGTT-1_2	E17.5_2	47531	7293	E17.5_2	47531	7293	0	0
CATTACGTCGGCCCGT-1_2	E17.5_2	13969	4326	E17.5_2	47456	6565	9	9
CATTATAACAGGGTCC-1_2	E17.5_2	25906	6241	E17.5_2	46172	6662	10	10
CCAAACAGAACCCTCG-1_2	E17.5_2	40834	7222	E17.5_2	46624	7214	9	9
CCAACGATGCACTGAT-1_2	E17.5_2	53072	7483	E17.5_2	48237	7476	6	6
CCAAGCGTAACTCGTA-1_2	E17.5_2	73839	8359	E17.5_2	47231	8030	19	19
CCAATGTCACAGCAAG-1_2	E17.5_2	70089	8107	E17.5_2	47338	7898	3	3
CCAATTGAATGTTAAT-1_2	E17.5_2	43470	7091	E17.5_2	46772	7075	6	6
CCACACTGAGATATTA-1_2	E17.5_2	51889	7790	E17.5_2	48345	7786	3	3
CCACCCAAGGAAAGTG-1_2	E17.5_2	59035	8038	E17.5_2	48151	8014	0	0
CCAGCCTGGACCAATA-1_2	E17.5_2	70837	8476	E17.5_2	47625	8286	20	20
CCAGGGACGTGGCCTC-1_2	E17.5_2	40226	7150	E17.5_2	46743	7140	18	18
CCATAGGTTGGCGTGG-1_2	E17.5_2	27036	6068	E17.5_2	46896	6419	5	5
CCATGCCTGTTTAGTA-1_2	E17.5_2	31662	6186	E17.5_2	47540	6280	3	3
CCATGCTCTGCAGGAA-1_2	E17.5_2	44298	7002	E17.5_2	46830	6999	6	6
CCATTAGCGATAATCC-1_2	E17.5_2	65867	8273	E17.5_2	47808	8144	2	2
CCATTCCCTGCCCACA-1_2	E17.5_2	38767	6809	E17.5_2	46854	6810	6	6
CCCGACCATAGTCCGC-1_2	E17.5_2	39774	6863	E17.5_2	46797	6854	2	2
CCCGCAGCGCGAACTA-1_2	E17.5_2	32929	6378	E17.5_2	47407	6429	17	17
CCCTCGGGAGCCTTGT-1_2	E17.5_2	16977	4953	E17.5_2	46820	6492	8	8
CCCTGAAATGAGTTGA-1_2	E17.5_2	41111	7085	E17.5_2	46677	7078	2	2
CCGAACCTTCCCGGCC-1_2	E17.5_2	47452	7078	E17.5_2	47455	7072	0	0
CCGCACAAAGACCAAC-1_2	E17.5_2	60937	8277	E17.5_2	48167	8235	21	21
CCGCTATCAGCACCAG-1_2	E17.5_2	48830	7344	E17.5_2	47988	7344	1	1
CCGGGACCCGCAGAGA-1_2	E17.5_2	24792	5686	E17.5_2	47656	6218	26	26
CCGGGCGGTCTCGTCA-1_2	E17.5_2	19463	4843	E17.5_2	48607	6021	17	17
CCGTAAGTTGGTCCCA-1_2	E17.5_2	21322	5103	E17.5_2	48363	5995	17	17
CCTAAATTAACGGTTC-1_2	E17.5_2	62842	8196	E17.5_2	47991	8145	20	20
CCTACTGCTTACACTT-1_2	E17.5_2	33100	6436	E17.5_2	47223	6491	2	2
CCTATGGGTTACCGTC-1_2	E17.5_2	47390	7335	E17.5_2	47409	7329	18	18
CCTCGAAGTGGACGGG-1_2	E17.5_2	3256	1654	E17.5_2	49294	7447	18	18
CCTCTAATCTGCCAAG-1_2	E17.5_2	33559	6402	E17.5_2	47242	6451	15	15
CCTGAATATTTACATA-1_2	E17.5_2	23871	5683	E17.5_2	47815	6248	2	2
CCTGACCACCGATGGT-1_2	E17.5_2	55736	7535	E17.5_2	48205	7527	1	1
CCTGTAAGACATGATA-1_2	E17.5_2	29467	5850	E17.5_2	47806	6033	17	17
CCTGTCACCCGGGCTC-1_2	E17.5_2	52713	7869	E17.5_2	48397	7862	21	21
CCTGTCGCCCGTAAAT-1_2	E17.5_2	71544	8301	E17.5_2	47378	8039	1	1
CGACAGTTCGCGTTAT-1_2	E17.5_2	63297	7720	E17.5_2	47530	7628	7	7
CGAGACCCTAGAGTGT-1_2	E17.5_2	57166	7792	E17.5_2	48181	7778	1	1
CGAGCTGGGCTTTAGG-1_2	E17.5_2	23783	5779	E17.5_2	46929	6441	9	9
CGATACCTCGCGGACA-1_2	E17.5_2	72367	8231	E17.5_2	47237	7921	1	1
CGATCCGACCCAGTGC-1_2	E17.5_2	52719	7659	E17.5_2	48345	7650	3	3
CGCAAACACGAGTTAC-1_2	E17.5_2	48514	7213	E17.5_2	47904	7205	6	6
CGCAGAAACATTTGCG-1_2	E17.5_2	29755	6557	E17.5_2	46555	6737	16	16
CGCATGGTGCGATGCT-1_2	E17.5_2	58836	8067	E17.5_2	48216	8043	20	20
CGCATTAGCTAATAGG-1_2	E17.5_2	45498	7684	E17.5_2	46851	7677	18	18
CGCCTCCCTCCTCTAT-1_2	E17.5_2	49396	7421	E17.5_2	48106	7416	20	20
CGCGCCCGACTTAATA-1_2	E17.5_2	40477	6979	E17.5_2	46775	6971	15	15
CGCGTCATATTAAACC-1_2	E17.5_2	15915	4926	E17.5_2	45600	6651	25	25
CGCTACGGGACATTTA-1_2	E17.5_2	54883	7725	E17.5_2	48285	7719	3	3
CGCTATTCTTAGGCTC-1_2	E17.5_2	57621	7767	E17.5_2	48108	7747	1	1
CGCTCGACATAATGAT-1_2	E17.5_2	41981	6846	E17.5_2	46785	6839	6	6
CGCTGTGACGCCGCAC-1_2	E17.5_2	40664	6842	E17.5_2	46820	6836	6	6
CGGAGCATGGCGATCC-1_2	E17.5_2	60998	8182	E17.5_2	48082	8150	20	20
CGGAGTTTGAGAGACA-1_2	E17.5_2	53425	7531	E17.5_2	48291	7521	2	2
CGGCCACGCACAAAGT-1_2	E17.5_2	78006	8495	E17.5_2	47078	8027	1	1
CGGCTTTGTATGATAA-1_2	E17.5_2	24544	5885	E17.5_2	46732	6430	5	5
CGGGAATTTATGTAAA-1_2	E17.5_2	55651	7742	E17.5_2	48285	7733	1	1
CGGGCAGCTAAACCGC-1_2	E17.5_2	74132	8435	E17.5_2	47264	8089	1	1
CGGGCCTTCTTTGTAA-1_2	E17.5_2	63777	7927	E17.5_2	47747	7866	3	3
CGGTCAAGTGGGAACC-1_2	E17.5_2	55277	7820	E17.5_2	48329	7813	2	2
CGTACCTGATAGGCCT-1_2	E17.5_2	39437	6903	E17.5_2	46848	6894	15	15
CGTAGCGCCGACGTTG-1_2	E17.5_2	24167	5896	E17.5_2	46993	6505	16	16
CGTATTAAGAGATCTA-1_2	E17.5_2	55356	7763	E17.5_2	48250	7749	3	3
CGTCAGTGCGCACAAG-1_2	E17.5_2	26971	6257	E17.5_2	46802	6633	16	16
CGTCAGTTTATCGTCT-1_2	E17.5_2	24922	6140	E17.5_2	46248	6660	10	10
CGTCTGGAAGGGCCCG-1_2	E17.5_2	24355	5621	E17.5_2	46918	6233	5	5
CGTGAAGTTAATTCAC-1_2	E17.5_2	47333	7190	E17.5_2	47392	7179	14	14
CGTGCAGACTGGGACA-1_2	E17.5_2	19739	4876	E17.5_2	48640	6032	20	20
CGTGCCCGACATTTGT-1_2	E17.5_2	13467	4429	E17.5_2	45841	6746	25	25
CGTGCCCTCCCGAAGA-1_2	E17.5_2	30352	6076	E17.5_2	47609	6223	0	0
CGTTGAGCGACCGTCG-1_2	E17.5_2	40897	6853	E17.5_2	46798	6846	20	20
CGTTTCGCTCATTACA-1_2	E17.5_2	49227	7477	E17.5_2	48084	7465	3	3
CTAAAGGGAAATAGGA-1_2	E17.5_2	55076	7516	E17.5_2	48202	7510	1	1
CTAAGGGAATGATTGG-1_2	E17.5_2	50844	7526	E17.5_2	48256	7523	20	20
CTAATTCGCACGCGCT-1_2	E17.5_2	46943	7110	E17.5_2	47276	7103	6	6
CTACGCACGGAGTACC-1_2	E17.5_2	50509	7527	E17.5_2	48232	7523	23	23
CTACTGCCACCTGACC-1_2	E17.5_2	32523	6763	E17.5_2	46769	6813	12	12
CTAGATTTACGACGGC-1_2	E17.5_2	44021	7014	E17.5_2	46810	7012	20	20
CTAGCATAGTATAATG-1_2	E17.5_2	70919	8309	E17.5_2	47491	8109	19	19
CTAGTCACGTCTTAAG-1_2	E17.5_2	66664	8290	E17.5_2	47787	8162	20	20
CTATCGGGTCTCAACA-1_2	E17.5_2	66516	8053	E17.5_2	47614	7927	19	19
CTATGTCACTAGCCCA-1_2	E17.5_2	58394	7974	E17.5_2	48167	7964	21	21
CTATGTCTATTGAAAC-1_2	E17.5_2	16175	4896	E17.5_2	46900	6571	8	8
CTCATGGCTCACAATC-1_2	E17.5_2	21107	5785	E17.5_2	46653	6596	16	16
CTCGAGGTCGAACAGT-1_2	E17.5_2	62727	7978	E17.5_2	47863	7922	1	1
CTCGGTCCGTAGCCTG-1_2	E17.5_2	36519	6986	E17.5_2	46569	6998	9	9
CTCTATTTGGCTGCAG-1_2	E17.5_2	43547	7088	E17.5_2	46815	7084	0	0
CTCTCACAATCGATGA-1_2	E17.5_2	75436	8308	E17.5_2	47116	7903	19	19
CTCTGCGAAGCAAGCA-1_2	E17.5_2	25132	5919	E17.5_2	47016	6414	9	9
CTCTGGACGCCTGGTG-1_2	E17.5_2	66123	8163	E17.5_2	47641	8033	1	1
CTGCAAATGGGCTCCA-1_2	E17.5_2	20867	6189	E17.5_2	45706	6971	10	10
CTGCCAAGGTTGGAAG-1_2	E17.5_2	34149	6520	E17.5_2	47057	6550	2	2
CTGCCATGCATCACAT-1_2	E17.5_2	53073	7638	E17.5_2	48319	7633	1	1
CTGGAAATGGATGCTT-1_2	E17.5_2	58682	7823	E17.5_2	48048	7804	1	1
CTGGGATCGCCCAGAT-1_2	E17.5_2	24868	6366	E17.5_2	46128	6823	10	10
CTGGGTAGGCAGTTAA-1_2	E17.5_2	24650	5769	E17.5_2	47850	6188	0	0
CTGTACTTCTTAGCAT-1_2	E17.5_2	52356	7739	E17.5_2	48355	7729	3	3
CTGTGCAGGGTAGGTC-1_2	E17.5_2	57740	7918	E17.5_2	48216	7907	20	20
CTTAACTTCGAAGTAC-1_2	E17.5_2	10371	3637	E17.5_2	47204	6739	8	8
CTTACACGGTATTCCA-1_2	E17.5_2	46097	7658	E17.5_2	46993	7641	9	9
CTTAGCCTTCCACATG-1_2	E17.5_2	60323	7920	E17.5_2	48039	7889	15	15
CTTCATTGTCAGTGGA-1_2	E17.5_2	72079	8360	E17.5_2	47404	8105	1	1
CTTCGTAGATAGGTGA-1_2	E17.5_2	62540	7855	E17.5_2	47757	7786	7	7
CTTGCCCAGGCTCTAC-1_2	E17.5_2	53869	7476	E17.5_2	48205	7470	7	7
CTTGTACTTGTTGACT-1_2	E17.5_2	25782	5888	E17.5_2	47579	6293	2	2
CTTTAGTGCTATTATT-1_2	E17.5_2	42096	7096	E17.5_2	46745	7090	1	1
CTTTGGCTTTAGTAAA-1_2	E17.5_2	51434	7490	E17.5_2	48242	7481	6	6
GAAACCGAATTACCTT-1_2	E17.5_2	51998	7556	E17.5_2	48286	7551	7	7
GAAATGGCGGTGTTAG-1_2	E17.5_2	74830	8433	E17.5_2	47207	8078	1	1
GAAATTGTCTCTATAA-1_2	E17.5_2	72309	8142	E17.5_2	47199	7852	1	1
GAACACACATCAACCA-1_2	E17.5_2	50035	7770	E17.5_2	48254	7757	6	6
GAACCATCTGGGAGAC-1_2	E17.5_2	14770	4609	E17.5_2	46735	6598	8	8
GAAGCGTGAGGAATTT-1_2	E17.5_2	70573	8246	E17.5_2	47396	8017	1	1
GAAGCTTGCTGACCGC-1_2	E17.5_2	54504	7371	E17.5_2	48156	7362	6	6
GAAGTGATTTATCGTG-1_2	E17.5_2	79247	8499	E17.5_2	46965	7963	1	1
GAAGTTTCCACTCAAT-1_2	E17.5_2	79525	8464	E17.5_2	46973	7917	1	1
GAATCGACATGGTCAC-1_2	E17.5_2	51915	7260	E17.5_2	48184	7252	6	6
GAATCTGAACATTCTC-1_2	E17.5_2	44702	7274	E17.5_2	46817	7267	1	1
GAATGTTGGGTAATCT-1_2	E17.5_2	27155	5929	E17.5_2	47643	6243	2	2
GAATTATAGTGAAAGG-1_2	E17.5_2	75507	8467	E17.5_2	47307	8084	19	19
GACAACGACCATTGAA-1_2	E17.5_2	75546	8726	E17.5_2	47528	8367	15	15
GACAACGCAGCTTACG-1_2	E17.5_2	34450	6834	E17.5_2	46549	6880	5	5
GACACAAGGGAAGAAA-1_2	E17.5_2	52086	7446	E17.5_2	48257	7439	17	17
GACCAGAGCCCTGTAG-1_2	E17.5_2	68264	8154	E17.5_2	47433	7970	1	1
GACCCGTCGCCGGCTA-1_2	E17.5_2	22384	5504	E17.5_2	46682	6307	5	5
GACCGTGCTGACGGTG-1_2	E17.5_2	62330	7945	E17.5_2	47848	7878	3	3
GACGTGTAGGGATTAT-1_2	E17.5_2	4051	1703	E17.5_2	49748	7310	2	2
GAGACTGATGGGTAGA-1_2	E17.5_2	62971	8025	E17.5_2	47860	7971	1	1
GAGATCTGCTTGGCAT-1_2	E17.5_2	68605	7978	E17.5_2	47328	7781	7	7
GAGATCTTCCATGACA-1_2	E17.5_2	40510	6981	E17.5_2	46838	6980	0	0
GAGCCACGGTAGTAGG-1_2	E17.5_2	16133	4814	E17.5_2	47233	6521	9	9
GAGTCCGCTTACCGGA-1_2	E17.5_2	58345	7714	E17.5_2	48025	7698	7	7
GATAGGTAACGTTGAC-1_2	E17.5_2	24054	5450	E17.5_2	48253	5998	17	17
GATCATTCCAAACATT-1_2	E17.5_2	80738	8419	E17.5_2	46881	7806	19	19
GATCCCTTTATACTGC-1_2	E17.5_2	45131	7579	E17.5_2	46797	7572	18	18
GATCCGGGAATTAACA-1_2	E17.5_2	72520	8352	E17.5_2	47345	8084	13	13
GATCGACACTATCTGA-1_2	E17.5_2	53252	7549	E17.5_2	48262	7542	4	4
GATCGCGGGCTCTCCA-1_2	E17.5_2	60671	7920	E17.5_2	48077	7884	3	3
GATCGGTGGCCATAAC-1_2	E17.5_2	26394	5974	E17.5_2	47456	6313	9	9
GATCGTGACTGATATC-1_2	E17.5_2	71092	8459	E17.5_2	47551	8251	20	20
GATCTTGGAGGGCATA-1_2	E17.5_2	55617	7776	E17.5_2	48259	7768	0	0
GATGCGTCCTGCATTC-1_2	E17.5_2	68771	8081	E17.5_2	47370	7882	1	1
GATGCTACAAGCGCCT-1_2	E17.5_2	21742	5718	E17.5_2	46996	6510	8	8
GATGCTGTATTTCATC-1_2	E17.5_2	41930	7004	E17.5_2	46798	7000	0	0
GATGTTCAATCCACGA-1_2	E17.5_2	36414	6599	E17.5_2	47108	6613	17	17
GATTCGACGGTTCACG-1_2	E17.5_2	51742	7643	E17.5_2	48315	7638	20	20
GCAAGTGCACAGAGAA-1_2	E17.5_2	52065	7444	E17.5_2	48288	7433	6	6
GCAGATTAGGGATATC-1_2	E17.5_2	70433	8238	E17.5_2	47453	8032	1	1
GCAGCACACAGCCCAG-1_2	E17.5_2	63058	7644	E17.5_2	47569	7558	7	7
GCATAGAGCACTCAGG-1_2	E17.5_2	62630	8009	E17.5_2	47799	7956	1	1
GCCCAGTTGGTATGCC-1_2	E17.5_2	26820	5916	E17.5_2	47433	6313	2	2
GCCCGCGCGTTTGACA-1_2	E17.5_2	29155	6243	E17.5_2	47372	6439	2	2
GCCGAAATTCCTACGT-1_2	E17.5_2	62693	7963	E17.5_2	47822	7892	7	7
GCCGATTGGCCAAGCT-1_2	E17.5_2	55325	7628	E17.5_2	48250	7618	1	1
GCCGGAAACACATCTT-1_2	E17.5_2	19820	5439	E17.5_2	46591	6508	16	16
GCCGGGTTAGGGTCGC-1_2	E17.5_2	56261	7701	E17.5_2	48189	7687	1	1
GCCTAGCGATCTGACC-1_2	E17.5_2	30671	6495	E17.5_2	46948	6630	2	2
GCGAAGCCATACCCGT-1_2	E17.5_2	63996	7958	E17.5_2	47732	7884	1	1
GCGAGGCCCGAGCAGA-1_2	E17.5_2	82455	8533	E17.5_2	46979	7866	3	3
GCGAGTTCTGCAAAGA-1_2	E17.5_2	77747	8530	E17.5_2	47321	8093	19	19
GCGCCGTTCCACGATA-1_2	E17.5_2	43347	7222	E17.5_2	46753	7219	1	1
GCGCTAATTGAATAGA-1_2	E17.5_2	79238	8383	E17.5_2	47102	7869	19	19
GCGCTATGCCGAGGCA-1_2	E17.5_2	59015	7745	E17.5_2	48004	7719	0	0
GCGGAGAGGGAGAACG-1_2	E17.5_2	27666	6145	E17.5_2	47624	6392	0	0
GCGTGTATGTCGTATT-1_2	E17.5_2	20849	5304	E17.5_2	46292	6342	10	10
GCTAATACCGAATGCC-1_2	E17.5_2	50583	7512	E17.5_2	48240	7506	6	6
GCTACGACTTATTGGG-1_2	E17.5_2	51021	7423	E17.5_2	48287	7422	0	0
GCTAGTAGAGCTTGTA-1_2	E17.5_2	59540	8037	E17.5_2	48192	8019	20	20
GCTCTATGTTACGTGC-1_2	E17.5_2	61627	7745	E17.5_2	47779	7671	6	6
GCTCTCGGGTACCGAA-1_2	E17.5_2	28133	6656	E17.5_2	46527	6866	31	31
GCTGAGGCGTGAGTAT-1_2	E17.5_2	50300	7570	E17.5_2	48230	7565	1	1
GCTGCACGGTTTCTTA-1_2	E17.5_2	48013	7382	E17.5_2	47754	7376	20	20
GCTGCTCTCCGGACAC-1_2	E17.5_2	68941	8205	E17.5_2	47484	8026	1	1
GCTTGATGATAATCAG-1_2	E17.5_2	8088	3078	E17.5_2	48218	6978	9	9
GGAATAACCTCAAGAA-1_2	E17.5_2	26089	6116	E17.5_2	46878	6537	16	16
GGAGAAGTCATTGGCA-1_2	E17.5_2	30958	6195	E17.5_2	47479	6308	6	6
GGAGACGACACCTTTG-1_2	E17.5_2	51058	7529	E17.5_2	48275	7525	1	1
GGAGCACCAAGAACTA-1_2	E17.5_2	17060	4789	E17.5_2	47901	6319	2	2
GGATGACGCGAGTTTA-1_2	E17.5_2	71317	8256	E17.5_2	47305	8019	7	7
GGCAAATTACTTTACT-1_2	E17.5_2	63569	7900	E17.5_2	47735	7821	3	3
GGCAAGGCGAAATAGC-1_2	E17.5_2	56664	7793	E17.5_2	48205	7777	0	0
GGCAATAGTCAATGAG-1_2	E17.5_2	65097	8072	E17.5_2	47726	7970	19	19
GGCACTCCACTGGGCA-1_2	E17.5_2	64599	7989	E17.5_2	47702	7895	7	7
GGCGCATGAATTGATG-1_2	E17.5_2	63478	7825	E17.5_2	47707	7746	1	1
GGCGCGTTCGAGTTTA-1_2	E17.5_2	48514	7190	E17.5_2	47907	7187	7	7
GGCGGAGTAATATTAG-1_2	E17.5_2	70828	8283	E17.5_2	47346	8057	1	1
GGCGGTAGGATCATTG-1_2	E17.5_2	71031	8181	E17.5_2	47298	7932	19	19
GGCTATTAAGTTGTAT-1_2	E17.5_2	41917	7001	E17.5_2	46727	6991	2	2
GGGACTGCATAGATAG-1_2	E17.5_2	70474	8270	E17.5_2	47420	8069	1	1
GGGAGAACTCACAGTA-1_2	E17.5_2	76205	8446	E17.5_2	47280	8074	19	19
GGGAGGATGCCCGAAA-1_2	E17.5_2	52479	7628	E17.5_2	48316	7624	3	3
GGGAGTTAATGAGGCG-1_2	E17.5_2	63941	8007	E17.5_2	47751	7933	19	19
GGGCCCGTCTTAAACA-1_2	E17.5_2	74422	8184	E17.5_2	47044	7805	1	1
GGGCGATATGTGTGAA-1_2	E17.5_2	61517	8121	E17.5_2	48059	8081	21	21
GGGCGTACATTTATAT-1_2	E17.5_2	17896	4933	E17.5_2	47758	6333	9	9
GGGCTGCCTAGGGCGA-1_2	E17.5_2	81931	8542	E17.5_2	46911	7890	19	19
GGGCTGGTTAGTCGCG-1_2	E17.5_2	76187	8355	E17.5_2	47131	7938	1	1
GGGTCACCGTGACGGT-1_2	E17.5_2	80476	8425	E17.5_2	46934	7838	3	3
GGGTGACACCTTAACT-1_2	E17.5_2	50006	7287	E17.5_2	48141	7280	7	7
GGTACAAACATGCTAT-1_2	E17.5_2	67970	8244	E17.5_2	47561	8107	3	3
GGTAGTGCTCGCACCA-1_2	E17.5_2	70123	8210	E17.5_2	47393	8011	19	19
GGTATTGCCGAGTTTA-1_2	E17.5_2	61967	7922	E17.5_2	47803	7878	3	3
GGTCAGTGGGTCCCAC-1_2	E17.5_2	42538	7205	E17.5_2	46732	7201	17	17
GGTGCTGGTACACATT-1_2	E17.5_2	59023	7575	E17.5_2	47923	7544	7	7
GGTTAGGCTTGGAGAA-1_2	E17.5_2	49034	7367	E17.5_2	48018	7359	6	6
GTAAGTAGGGTATACC-1_2	E17.5_2	36509	6516	E17.5_2	47105	6520	6	6
GTACACTTACCTGAAG-1_2	E17.5_2	67321	8346	E17.5_2	47732	8209	19	19
GTACGCTTCATTGCAC-1_2	E17.5_2	44149	7034	E17.5_2	46842	7027	0	0
GTACGTTTGCCCGTCA-1_2	E17.5_2	46556	7198	E17.5_2	47131	7191	0	0
GTACTAAGATTTGGAG-1_2	E17.5_2	50101	7713	E17.5_2	48248	7709	21	21
GTAGACAACCGATGAA-1_2	E17.5_2	34441	6675	E17.5_2	46542	6744	16	16
GTAGCGGCTATACACT-1_2	E17.5_2	63145	8078	E17.5_2	47891	8018	20	20
GTATCTCCCTAACTGT-1_2	E17.5_2	22948	6175	E17.5_2	46057	6790	10	10
GTATCTTTCATAACCA-1_2	E17.5_2	48828	7479	E17.5_2	47993	7474	1	1
GTCAAGCGGACTCGGG-1_2	E17.5_2	31403	6293	E17.5_2	47509	6385	17	17
GTCACAAAGTTTCCAA-1_2	E17.5_2	33834	6904	E17.5_2	46395	6964	5	5
GTCATGCACCTCCGTT-1_2	E17.5_2	57797	7923	E17.5_2	48181	7910	21	21
GTCATGGACATGACTA-1_2	E17.5_2	42984	7671	E17.5_2	46433	7651	31	31
GTCATTAGAGCGAACG-1_2	E17.5_2	67333	8327	E17.5_2	47719	8210	20	20
GTCCCAACGTAAAGTA-1_2	E17.5_2	78164	8488	E17.5_2	46999	7986	19	19
GTCCGGCTGAATTGCG-1_2	E17.5_2	51479	7659	E17.5_2	48296	7655	18	18
GTCGCGTAACCCGTTG-1_2	E17.5_2	24061	5591	E17.5_2	48282	6099	0	0
GTCGGATATCTCAGAC-1_2	E17.5_2	53161	7850	E17.5_2	48427	7841	6	6
GTCGTACCATCTCGGG-1_2	E17.5_2	45807	6992	E17.5_2	47025	6988	1	1
GTCGTTATTCGCTTAT-1_2	E17.5_2	26484	5892	E17.5_2	47858	6230	0	0
GTCTATCTGAGTTTCT-1_2	E17.5_2	34634	6498	E17.5_2	47230	6523	17	17
GTGAGGACACTTAAGG-1_2	E17.5_2	24421	5656	E17.5_2	48073	6143	0	0
GTGATCATAGATCTGC-1_2	E17.5_2	64555	7799	E17.5_2	47605	7718	1	1
GTGCAACAAATGTGGC-1_2	E17.5_2	31480	6516	E17.5_2	46623	6655	5	5
GTGCTCAAGTACTGTC-1_2	E17.5_2	62070	7778	E17.5_2	47780	7728	3	3
GTGGGCTTAGACACAC-1_2	E17.5_2	41867	6719	E17.5_2	46849	6710	6	6
GTGGTGGCCAAGTGAA-1_2	E17.5_2	30622	6361	E17.5_2	47465	6488	0	0
GTGTACCTTGGCTACG-1_2	E17.5_2	52387	8030	E17.5_2	48448	8022	2	2
GTGTTACTATGCGTCC-1_2	E17.5_2	36927	6519	E17.5_2	47093	6526	0	0
GTTACCTACAACTTGC-1_2	E17.5_2	47946	7310	E17.5_2	47732	7307	0	0
GTTACTTTGGGCCTAG-1_2	E17.5_2	58797	7712	E17.5_2	48020	7681	7	7
GTTATCACCTTCTGAA-1_2	E17.5_2	19156	5301	E17.5_2	46712	6501	16	16
GTTCCAGTCTGACCAT-1_2	E17.5_2	36260	6700	E17.5_2	46898	6704	26	26
GTTCGCCATAAGTGCC-1_2	E17.5_2	37780	6787	E17.5_2	46958	6784	3	3
GTTGCACGGAGTTTCG-1_2	E17.5_2	35907	6967	E17.5_2	46671	6979	2	2
GTTGGATTTGCGTTGG-1_2	E17.5_2	54261	7564	E17.5_2	48289	7559	3	3
GTTTACGTTCCATCTG-1_2	E17.5_2	35747	6761	E17.5_2	47048	6757	17	17
GTTTCCTGGAGGGTGA-1_2	E17.5_2	26149	6164	E17.5_2	47230	6553	2	2
GTTTCTGCAGTCTCCC-1_2	E17.5_2	55407	7666	E17.5_2	48280	7659	20	20
GTTTGACCAAATCCTA-1_2	E17.5_2	69950	8222	E17.5_2	47481	8050	1	1
TAACATACAATGTGGG-1_2	E17.5_2	73645	8421	E17.5_2	47480	8118	20	20
TAACCGCCCGCAGTGC-1_2	E17.5_2	27483	6224	E17.5_2	47036	6515	8	8
TAACTCATCCGCGCGG-1_2	E17.5_2	59692	7814	E17.5_2	47999	7793	7	7
TACAACGCACAACTCA-1_2	E17.5_2	79414	8303	E17.5_2	46856	7719	1	1
TACAAGCTGTTCACTG-1_2	E17.5_2	23197	6115	E17.5_2	46374	6741	22	22
TACATAGGCATACACC-1_2	E17.5_2	53527	7548	E17.5_2	48278	7542	1	1
TACATTTCTAACGTGC-1_2	E17.5_2	53870	7844	E17.5_2	48367	7838	3	3
TACCGGCTCACTGCCC-1_2	E17.5_2	44729	7116	E17.5_2	46856	7108	0	0
TACGAACACGACTTCA-1_2	E17.5_2	61211	8123	E17.5_2	48007	8092	23	23
TACGACGCTTGCTGCG-1_2	E17.5_2	49199	7141	E17.5_2	48028	7137	7	7
TACGACTGCCTCTTAG-1_2	E17.5_2	42073	7063	E17.5_2	46722	7058	1	1
TACGCAGTTCTTTCCT-1_2	E17.5_2	63722	7799	E17.5_2	47674	7704	1	1
TACGCCATATTCTAAT-1_2	E17.5_2	60590	7843	E17.5_2	47907	7809	1	1
TAGAGCTACGAAGAAC-1_2	E17.5_2	42363	7207	E17.5_2	46631	7192	26	26
TAGAGTCTAAGCGAAC-1_2	E17.5_2	73499	8396	E17.5_2	47227	8080	1	1
TAGCGTTGGGTCTTAC-1_2	E17.5_2	56564	7888	E17.5_2	48271	7880	20	20
TAGCTAAGTCCGGGAG-1_2	E17.5_2	63726	8022	E17.5_2	47774	7962	1	1
TAGGGTGTTTCAAGAG-1_2	E17.5_2	28496	6177	E17.5_2	46761	6434	5	5
TAGGTGAGCCCTACTC-1_2	E17.5_2	38912	6679	E17.5_2	46884	6676	2	2
TAGGTTCGAGTTCGTC-1_2	E17.5_2	67111	8106	E17.5_2	47593	7964	19	19
TAGTCCGCAGAGAATG-1_2	E17.5_2	55373	7960	E17.5_2	48361	7951	3	3
TAGTGCCCTCCAGAGT-1_2	E17.5_2	72044	8217	E17.5_2	47236	7953	3	3
TATAAATCCACAAGCT-1_2	E17.5_2	47180	7419	E17.5_2	47341	7413	6	6
TATAAGTGAGGATAGC-1_2	E17.5_2	31972	6293	E17.5_2	47307	6391	6	6
TATATTCGCGTCGATA-1_2	E17.5_2	22812	5842	E17.5_2	46773	6513	16	16
TATCCATATCATGCGA-1_2	E17.5_2	41640	7197	E17.5_2	46633	7192	26	26
TATCCTGCATGGGAAT-1_2	E17.5_2	35386	6921	E17.5_2	46781	6940	26	26
TATCGATGATTAAACG-1_2	E17.5_2	21006	5328	E17.5_2	47862	6204	2	2
TATCTACCACAGCGGG-1_2	E17.5_2	57360	7590	E17.5_2	48049	7575	1	1
TATGGATGTGCTACGC-1_2	E17.5_2	26260	5979	E17.5_2	47404	6343	9	9
TATGGGACCGAGCAGG-1_2	E17.5_2	72837	8253	E17.5_2	47208	7949	1	1
TATGGGTACGTATCGT-1_2	E17.5_2	67143	8156	E17.5_2	47561	8016	1	1
TATGGTCTGAGTAACA-1_2	E17.5_2	66091	8152	E17.5_2	47710	8044	1	1
TATTCAATTCTAATCC-1_2	E17.5_2	63788	8008	E17.5_2	47776	7943	19	19
TATTCCGGCAGTCCTA-1_2	E17.5_2	22246	5882	E17.5_2	46640	6607	22	22
TATTCGTGCCAGAATA-1_2	E17.5_2	62937	8020	E17.5_2	47880	7967	19	19
TATTTGTTACCCTTTA-1_2	E17.5_2	35487	6607	E17.5_2	47031	6620	6	6
TCAAACTTAGATTGTT-1_2	E17.5_2	72270	8366	E17.5_2	47269	8078	1	1
TCAACGAGGAGACAAA-1_2	E17.5_2	71741	8222	E17.5_2	47288	7939	3	3
TCACAGGGAATCGCAA-1_2	E17.5_2	25294	5902	E17.5_2	47758	6291	0	0
TCACAGGTTATTGGGC-1_2	E17.5_2	67368	8128	E17.5_2	47594	8005	1	1
TCACCCTCTTAAGATT-1_2	E17.5_2	53996	7635	E17.5_2	48296	7628	1	1
TCACGCATTGTAGATC-1_2	E17.5_2	60181	7908	E17.5_2	47977	7872	3	3
TCACGGTCATCGCACA-1_2	E17.5_2	15732	4385	E17.5_2	48670	6241	6	6
TCACGTGCCCGATTCA-1_2	E17.5_2	61471	7896	E17.5_2	47940	7842	1	1
TCAGACGCTATAGAAG-1_2	E17.5_2	46794	7325	E17.5_2	47207	7319	0	0
TCAGCAAATGCATCTC-1_2	E17.5_2	60156	7762	E17.5_2	47921	7733	19	19
TCAGTACTGACCCGCG-1_2	E17.5_2	44108	7107	E17.5_2	46817	7102	2	2
TCCACAATGGTTTACG-1_2	E17.5_2	58208	7649	E17.5_2	48028	7621	6	6
TCCAGAGCACCGGTTC-1_2	E17.5_2	60696	7915	E17.5_2	48033	7888	20	20
TCCAGGCGAGTACGGT-1_2	E17.5_2	67839	8126	E17.5_2	47481	7949	1	1
TCCCAAAGACGAAGGA-1_2	E17.5_2	38663	7572	E17.5_2	46308	7562	31	31
TCCCAGCTTTAGTCTG-1_2	E17.5_2	65251	7950	E17.5_2	47594	7847	1	1
TCCCAGGCTTAGCTAA-1_2	E17.5_2	58638	7874	E17.5_2	48125	7853	18	18
TCCCGTCAGTCCCGCA-1_2	E17.5_2	48268	7457	E17.5_2	47833	7445	15	15
TCCGATGACTGAGCTC-1_2	E17.5_2	49136	7396	E17.5_2	48028	7384	15	15
TCCTCGGGCTGGGCTT-1_2	E17.5_2	23476	5594	E17.5_2	48191	6111	0	0
TCCTTCAGTGGTCGAA-1_2	E17.5_2	19662	5322	E17.5_2	47071	6417	8	8
TCCTTTCTTACGCTTA-1_2	E17.5_2	64839	8074	E17.5_2	47714	7985	1	1
TCGAAATTTAGGACCA-1_2	E17.5_2	38601	7224	E17.5_2	46633	7218	9	9
TCGAGACCAACACCGT-1_2	E17.5_2	57717	7795	E17.5_2	48160	7784	3	3
TCGCAAAGATGCATTT-1_2	E17.5_2	40994	6957	E17.5_2	46761	6953	0	0
TCGCCGGTCGATCCGT-1_2	E17.5_2	31986	6573	E17.5_2	46827	6672	9	9
TCGCTCGATATATTCC-1_2	E17.5_2	50045	7518	E17.5_2	48204	7512	21	21
TCGGAGTACATGAGTA-1_2	E17.5_2	61185	7881	E17.5_2	47894	7840	19	19
TCGGGTGAAACTGCTA-1_2	E17.5_2	30243	6372	E17.5_2	46619	6554	5	5
TCGTATAGTGCAATTA-1_2	E17.5_2	7104	2928	E17.5_2	46936	7066	8	8
TCGTCCGCTGGCGTCT-1_2	E17.5_2	32066	6284	E17.5_2	47417	6379	6	6
TCGTGTACTATGGATG-1_2	E17.5_2	970	660	E17.5_2	47854	7954	17	17
TCGTTCGTTATTATGT-1_2	E17.5_2	25598	5937	E17.5_2	46714	6408	5	5
TCTAGCATCTTCGATG-1_2	E17.5_2	31813	6056	E17.5_2	47609	6153	6	6
TCTAGCATGCCCAGAA-1_2	E17.5_2	48293	7319	E17.5_2	47844	7316	0	0
TCTAGTTATCAGAAGA-1_2	E17.5_2	53102	7744	E17.5_2	48356	7735	3	3
TCTATCGGTCGCAACA-1_2	E17.5_2	31195	6597	E17.5_2	46455	6740	5	5
TCTCTAATAGCTGGTA-1_2	E17.5_2	26799	6015	E17.5_2	47482	6340	2	2
TCTGAACCGGTCGGCT-1_2	E17.5_2	27257	5836	E17.5_2	47608	6155	2	2
TCTGCCAGAAACTGCA-1_2	E17.5_2	12649	4006	E17.5_2	48899	6433	17	17
TCTTATGGGTAGTACC-1_2	E17.5_2	7721	3217	E17.5_2	46872	7107	8	8
TCTTCGAATAGACGTT-1_2	E17.5_2	59497	7962	E17.5_2	48126	7940	20	20
TCTTCGATACCAATAA-1_2	E17.5_2	84705	8679	E17.5_2	46898	7964	19	19
TCTTGATGCGTAGCGA-1_2	E17.5_2	64674	8133	E17.5_2	47777	8053	19	19
TGACCCACGTTAGACA-1_2	E17.5_2	76767	8481	E17.5_2	47089	8035	1	1
TGACTATAATCCTTTC-1_2	E17.5_2	45743	7160	E17.5_2	46984	7159	0	0
TGAGAATGCTTTACCG-1_2	E17.5_2	24007	5833	E17.5_2	47364	6431	9	9
TGAGTAAATTAGCGTA-1_2	E17.5_2	37553	6443	E17.5_2	47129	6451	7	7
TGATCGGTTTGACCCT-1_2	E17.5_2	49341	7454	E17.5_2	48070	7443	18	18
TGATCTCCGGCGCCAG-1_2	E17.5_2	36708	6694	E17.5_2	47056	6697	18	18
TGATTCGTCTATCACT-1_2	E17.5_2	56824	7866	E17.5_2	48205	7852	2	2
TGCAAGAATGACGTAA-1_2	E17.5_2	76968	8480	E17.5_2	47134	8007	1	1
TGCAGAGTACCGAGCA-1_2	E17.5_2	71536	8184	E17.5_2	47207	7892	1	1
TGCAGGATCGGCAAAG-1_2	E17.5_2	42684	7151	E17.5_2	46721	7144	15	15
TGCCACCTGGCGAAAC-1_2	E17.5_2	24117	5583	E17.5_2	47945	6111	2	2
TGCCCGTACCGTTAAA-1_2	E17.5_2	46166	7179	E17.5_2	47051	7177	0	0
TGCGCAAAGCATTTGG-1_2	E17.5_2	77650	8555	E17.5_2	47221	8095	19	19
TGCGGAGTAAAGGTGC-1_2	E17.5_2	30405	6244	E17.5_2	47471	6390	15	15
TGCGGCATAGTTCAAC-1_2	E17.5_2	21775	5666	E17.5_2	47079	6425	8	8
TGCGTTTGTTGACACT-1_2	E17.5_2	32893	6334	E17.5_2	47379	6369	0	0
TGCTATACAAACGGAC-1_2	E17.5_2	26599	6320	E17.5_2	46646	6721	16	16
TGCTGGTTGGACAATT-1_2	E17.5_2	41109	7007	E17.5_2	46761	7001	6	6
TGCTGTTGAAGAACTC-1_2	E17.5_2	68696	8369	E17.5_2	47766	8247	20	20
TGGACTGTTCGCTCAA-1_2	E17.5_2	65941	8292	E17.5_2	47755	8201	20	20
TGGAGTGATGCGATGA-1_2	E17.5_2	54616	7566	E17.5_2	48254	7559	6	6
TGGCAGATTACGATCA-1_2	E17.5_2	55698	7463	E17.5_2	48163	7452	1	1
TGGCAGCAGTAATAGT-1_2	E17.5_2	54637	7848	E17.5_2	48327	7842	1	1
TGGCCGTATATTGACC-1_2	E17.5_2	54358	7343	E17.5_2	48206	7337	6	6
TGGCTTTGGGTAGACA-1_2	E17.5_2	36240	6809	E17.5_2	46866	6823	26	26
TGGTATCGGTCTGTAT-1_2	E17.5_2	21686	5524	E17.5_2	46995	6391	16	16
TGGTTCGTAGCAAAGG-1_2	E17.5_2	22319	5613	E17.5_2	46613	6350	5	5
TGTACGAACAAATCCG-1_2	E17.5_2	81128	8565	E17.5_2	46881	7929	1	1
TGTATCCTTATTCCAT-1_2	E17.5_2	32502	6901	E17.5_2	46567	6994	16	16
TGTCCCGACATAGCAC-1_2	E17.5_2	25855	5957	E17.5_2	46766	6372	5	5
TGTCTACAGTTTCTGT-1_2	E17.5_2	22319	5713	E17.5_2	47113	6445	8	8
TGTGACTACGCCAGTC-1_2	E17.5_2	32338	6194	E17.5_2	47462	6281	15	15
TGTGGAGGAAGCTTAA-1_2	E17.5_2	26265	6273	E17.5_2	46538	6657	22	22
TGTGTCGCGAGTTGCA-1_2	E17.5_2	41239	7109	E17.5_2	46631	7101	2	2
TGTTCCGCTTCCATGA-1_2	E17.5_2	69969	8125	E17.5_2	47336	7894	7	7
TGTTCTTCCATTGACT-1_2	E17.5_2	44747	7404	E17.5_2	46811	7393	9	9
TGTTTCGGTACTTCTC-1_2	E17.5_2	29539	6280	E17.5_2	46645	6506	5	5
TTAAACCGGTAGCGAC-1_2	E17.5_2	26403	6154	E17.5_2	46923	6568	16	16
TTAACCAACCCTCCCT-1_2	E17.5_2	35033	6624	E17.5_2	46600	6678	5	5
TTAACGTCGCAAGACC-1_2	E17.5_2	26811	6421	E17.5_2	46539	6742	22	22
TTAAGCGCCTGACCCA-1_2	E17.5_2	55877	7718	E17.5_2	48248	7706	2	2
TTAATGTAGACCAGGT-1_2	E17.5_2	61006	7998	E17.5_2	48012	7963	21	21
TTACTAAAGGACTTTA-1_2	E17.5_2	21210	5056	E17.5_2	48532	5971	17	17
TTACTGGGATATTTCA-1_2	E17.5_2	64735	7957	E17.5_2	47623	7845	7	7
TTATATACGCTGTCAC-1_2	E17.5_2	53817	7760	E17.5_2	48347	7755	20	20
TTATCTGTATCATAAC-1_2	E17.5_2	27731	6185	E17.5_2	46660	6492	5	5
TTATGAATGAAAGGGA-1_2	E17.5_2	56241	7783	E17.5_2	48224	7768	1	1
TTATGACAAACTGGAT-1_2	E17.5_2	46072	7355	E17.5_2	47011	7345	6	6
TTATTAGAGCGTGTTC-1_2	E17.5_2	49714	7423	E17.5_2	48161	7420	0	0
TTATTAGGGAAGCATC-1_2	E17.5_2	29427	6301	E17.5_2	46579	6525	5	5
TTCAAAGTCTCTAGCC-1_2	E17.5_2	61377	8061	E17.5_2	47991	8020	0	0
TTCAACGACCCGACCG-1_2	E17.5_2	45121	7433	E17.5_2	46853	7428	6	6
TTCACGAAAGGATCAC-1_2	E17.5_2	60116	7994	E17.5_2	48113	7960	3	3
TTCCGCGTGAGGCGAT-1_2	E17.5_2	54213	7687	E17.5_2	48274	7682	1	1
TTCCTCGAGGGTGTCT-1_2	E17.5_2	46464	7369	E17.5_2	47100	7360	6	6
TTCGACGGGAAGGGCG-1_2	E17.5_2	38443	6576	E17.5_2	46987	6574	6	6
TTCGCACTCGCGTGCT-1_2	E17.5_2	45473	7075	E17.5_2	46948	7067	6	6
TTCGGGACTAATCGCG-1_2	E17.5_2	79997	8588	E17.5_2	47042	8034	19	19
TTCTAGGCCAATTGTG-1_2	E17.5_2	20608	5085	E17.5_2	48222	6037	6	6
TTCTGCCGCGCCTAGA-1_2	E17.5_2	45390	6946	E17.5_2	46963	6943	0	0
TTCTTGTAACCTAATG-1_2	E17.5_2	9574	3459	E17.5_2	47979	6774	9	9
TTGAAGAATTCCCAGG-1_2	E17.5_2	78334	8334	E17.5_2	46878	7774	14	14
TTGAATATGGACTTTC-1_2	E17.5_2	36731	6762	E17.5_2	47015	6764	0	0
TTGACGATTCAGCACG-1_2	E17.5_2	29457	6432	E17.5_2	46854	6688	16	16
TTGATTATGCAGATGA-1_2	E17.5_2	40600	6903	E17.5_2	46724	6894	2	2
TTGCACAATTCAGAAA-1_2	E17.5_2	65125	8147	E17.5_2	47721	8049	23	23
TTGCACGGAGCAGCAC-1_2	E17.5_2	25187	6086	E17.5_2	47006	6527	9	9
TTGCTCCCATACCGGA-1_2	E17.5_2	28653	6025	E17.5_2	47584	6241	15	15
TTGCTGATCATGTTCG-1_2	E17.5_2	69492	8097	E17.5_2	47407	7909	1	1
TTGGATCGACTTCTGG-1_2	E17.5_2	22064	5493	E17.5_2	47052	6273	5	5
TTGGATTGGGTACCAC-1_2	E17.5_2	19766	5356	E17.5_2	47172	6414	9	9
TTGGCTCGCATGAGAC-1_2	E17.5_2	34932	6532	E17.5_2	47063	6565	6	6
TTGTAATCCGTACTCG-1_2	E17.5_2	65624	8118	E17.5_2	47705	8026	1	1
TTGTCGTTCAGTTACC-1_2	E17.5_2	27282	6345	E17.5_2	47007	6653	9	9
TTGTTAGCAAATTCGA-1_2	E17.5_2	46011	7034	E17.5_2	47035	7024	6	6
TTGTTCAGTGTGCTAC-1_2	E17.5_2	29133	6248	E17.5_2	46765	6447	5	5

## Sheet: Visium_E14.5_DEGs
	p_val	avg_logFC	pct.1	pct.2	p_val_adj	cluster	gene
Fabp4	5.56269e-27	1.02422	1	0.98	8.38631e-23	0	Fabp4
Tnnt1	9.10745e-17	0.790785	1	1	1.37304e-12	0	Tnnt1
Mb	5.17038e-16	0.638989	1	1	7.79487e-12	0	Mb
Spon2	1.81654e-15	0.586885	1	0.92	2.73861e-11	0	Spon2
Mif	7.49602e-15	0.361639	1	1	1.1301e-10	0	Mif
Gpihbp1	9.30644e-14	0.623221	0.8	0.444	1.40304e-09	0	Gpihbp1
Apln	1.86253e-13	0.622086	0.723	0.375	2.80796e-09	0	Apln
Msln	4.17231e-12	0.594473	0.831	0.535	6.29017e-08	0	Msln
Slc38a5	4.32907e-12	0.545241	0.769	0.4	6.5265e-08	0	Slc38a5
Lsp1	7.84068e-12	0.380366	1	0.975	1.18206e-07	0	Lsp1
Gucy1a3	6.50013e-11	0.49883	0.985	0.892	9.7996e-07	0	Gucy1a3
Prrg3	2.23962e-10	0.460636	0.877	0.622	3.37645e-06	0	Prrg3
Tcf21	8.67471e-10	0.41199	0.954	0.684	1.3078e-05	0	Tcf21
Pgk1	9.99641e-10	0.355272	1	1	1.50706e-05	0	Pgk1
Col4a2	1.27489e-09	0.278188	1	1	1.92202e-05	0	Col4a2
Slc25a5	2.05824e-09	0.321533	1	1	3.10301e-05	0	Slc25a5
Aplnr	2.81432e-09	0.63272	0.846	0.604	4.24287e-05	0	Aplnr
Slc16a3	3.26352e-09	0.338401	1	0.981	4.92008e-05	0	Slc16a3
Dpep1	1.19937e-08	0.274305	0.385	0.126	0.000180817	0	Dpep1
Hspb7	1.8231e-08	0.334339	1	1	0.000274851	0	Hspb7
Col4a1	4.22232e-08	0.263122	1	1	0.000636556	0	Col4a1
Cdh5	1.07045e-07	0.318686	1	0.967	0.00161381	0	Cdh5
Rgcc	1.12387e-07	0.309965	0.538	0.245	0.00169435	0	Rgcc
Tcf15	1.96948e-07	0.422964	0.615	0.359	0.00296919	0	Tcf15
F13a1	2.37929e-07	0.304211	0.492	0.206	0.00358702	0	F13a1
Cycs	3.22098e-07	0.28322	1	1	0.00485594	0	Cycs
Bves	3.7731e-07	0.323267	1	0.994	0.00568833	0	Bves
Esam	4.18653e-07	0.299673	0.969	0.887	0.00631162	0	Esam
Rem1	5.23481e-07	0.326513	0.754	0.499	0.007892	0	Rem1
Kcne1	5.23974e-07	0.308164	1	0.961	0.00789943	0	Kcne1
2022-09-11	5.57337e-07	0.257687	1	0.981	0.00840241	0	2022-09-11
Lbh	6.91056e-07	0.29708	1	1	0.0104184	0	Lbh
Myct1	7.93239e-07	0.387323	0.692	0.48	0.0119589	0	Myct1
Col15a1	9.59084e-07	0.410817	0.938	0.819	0.0144591	0	Col15a1
Plat	1.02308e-06	0.294212	0.954	0.807	0.015424	0	Plat
Cdh2	1.11568e-06	0.275663	1	0.992	0.01682	0	Cdh2
Atp5g3	1.35626e-06	0.303636	1	1	0.020447	0	Atp5g3
Loxl2	1.51369e-06	0.344224	1	0.972	0.0228203	0	Loxl2
Lpar3	1.97553e-06	0.318365	0.954	0.711	0.0297831	0	Lpar3
Wt1	2.18051e-06	0.265576	0.862	0.626	0.0328734	0	Wt1
Slc16a1	2.54352e-06	0.333734	0.985	0.926	0.0383461	0	Slc16a1
Timm8a1	2.63935e-06	0.303731	0.985	0.937	0.0397908	0	Timm8a1
Pde2a	3.01371e-06	0.384961	0.692	0.502	0.0454347	0	Pde2a
Tmem88	3.15003e-06	0.42486	0.862	0.732	0.0474898	0	Tmem88
Nes	3.62324e-06	0.277708	0.985	0.911	0.054624	0	Nes
Robo4	4.01829e-06	0.349083	0.769	0.531	0.0605797	0	Robo4
Rrm2	4.09739e-06	0.299693	1	0.992	0.0617723	0	Rrm2
Megf6	4.25121e-06	0.299754	0.969	0.937	0.0640913	0	Megf6
Lta4h	4.91252e-06	0.273827	1	0.995	0.0740611	0	Lta4h
Hey2	5.20682e-06	0.297456	0.954	0.896	0.0784981	0	Hey2
Sparcl1	6.22908e-06	0.310107	0.985	0.943	0.0939097	0	Sparcl1
2022-09-04	9.03755e-06	0.262729	0.708	0.446	0.13625	0	2022-09-04
Smc4	9.0702e-06	0.271934	1	0.983	0.136742	0	Smc4
Tnxb	1.244e-05	0.313084	0.708	0.482	0.187545	0	Tnxb
Ppif	1.50414e-05	0.250616	1	0.981	0.226764	0	Ppif
Pla2g16	1.52615e-05	0.255651	1	0.981	0.230082	0	Pla2g16
Popdc2	1.71991e-05	0.261781	1	0.997	0.259294	0	Popdc2
Lxn	1.81664e-05	0.305066	0.923	0.879	0.273877	0	Lxn
Ezr	1.83452e-05	0.257851	0.969	0.984	0.276572	0	Ezr
Tmem255a	2.09101e-05	0.352014	0.692	0.542	0.31524	0	Tmem255a
Cisd3	2.30371e-05	0.280518	0.877	0.719	0.347308	0	Cisd3
Kitl	3.12055e-05	0.331825	0.8	0.598	0.470454	0	Kitl
Myl2	3.26325e-05	0.35456	1	1	0.491968	0	Myl2
Sox3	3.32126e-05	0.327371	0.492	0.276	0.500713	0	Sox3
1110032F04Rik	3.49488e-05	0.265491	0.615	0.38	0.526887	0	1110032F04Rik
Hddc2	3.53963e-05	0.250695	0.877	0.675	0.533635	0	Hddc2
Bcl6b	3.70603e-05	0.300876	0.831	0.691	0.558721	0	Bcl6b
Hmmr	5.28345e-05	0.271438	0.938	0.816	0.796533	0	Hmmr
Mme	5.32842e-05	0.278927	0.523	0.289	0.803313	0	Mme
G0s2	5.39238e-05	0.252717	0.969	0.769	0.812955	0	G0s2
2200002D01Rik	5.47352e-05	0.263753	0.569	0.341	0.825188	0	2200002D01Rik
Pdgfb	5.91842e-05	0.317663	0.692	0.485	0.892261	0	Pdgfb
Spint2	5.95382e-05	0.295207	0.969	0.923	0.897597	0	Spint2
Pcdh12	6.06505e-05	0.291689	0.585	0.363	0.914367	0	Pcdh12
Haus8	6.76963e-05	0.261339	0.985	0.945	1	0	Haus8
Bnip3	7.31653e-05	0.260351	1	0.984	1	0	Bnip3
Hbb-y	7.68225e-05	0.514858	0.985	0.954	1	0	Hbb-y
Myl3	8.44089e-05	0.291085	1	1	1	0	Myl3
Cldn5	0.000130999	0.323298	0.831	0.716	1	0	Cldn5
Tcea3	0.000147834	0.336992	0.923	0.786	1	0	Tcea3
Dpysl3	0.000180277	0.254338	1	0.997	1	0	Dpysl3
Capn6	0.000191766	0.28805	1	0.998	1	0	Capn6
Ndufaf6	0.000212062	0.253217	0.862	0.642	1	0	Ndufaf6
Tcf4	0.000212706	0.278814	0.892	0.911	1	0	Tcf4
Spag5	0.000219839	0.25039	0.954	0.724	1	0	Spag5
Gimap4	0.000233539	0.300373	0.723	0.553	1	0	Gimap4
Cav1	0.000242192	0.257228	1	0.991	1	0	Cav1
Tbc1d7	0.000251265	0.26343	0.923	0.765	1	0	Tbc1d7
Hba-x	0.000372587	0.589095	0.754	0.568	1	0	Hba-x
Rspo1	0.000446457	0.331933	0.585	0.391	1	0	Rspo1
Tspan13	0.000453364	0.276191	0.938	0.807	1	0	Tspan13
2022-09-06	0.000517256	0.264454	1	0.965	1	0	2022-09-06
Cenpv	0.000533553	0.251898	0.877	0.699	1	0	Cenpv
St3gal1	0.000652267	0.252441	0.877	0.728	1	0	St3gal1
Ets1	0.000661454	0.2767	0.969	0.837	1	0	Ets1
Arhgap18	0.000837296	0.263565	0.892	0.804	1	0	Arhgap18
Dck	0.000948254	0.259453	0.785	0.641	1	0	Dck
Plxna4	0.000978138	0.282078	0.585	0.397	1	0	Plxna4
Ptpn18	0.00203862	0.264722	0.8	0.597	1	0	Ptpn18
Dpp4	0.00258486	0.274372	0.677	0.529	1	0	Dpp4
Slc31a2	0.00268043	0.264689	0.708	0.6	1	0	Slc31a2
Retsat	0.00799089	0.252773	0.477	0.353	1	0	Retsat
Acta1	1.08614e-12	0.53556	1	0.989	1.63746e-08	1	Acta1
9630028I04Rik	3.61652e-08	0.381134	0.702	0.321	0.000545226	1	9630028I04Rik
Slc26a10	9.34349e-07	0.343621	0.681	0.344	0.0140862	1	Slc26a10
Bex1	1.95714e-06	0.294735	1	1	0.0295059	1	Bex1
4833412C05Rik	2.6567e-06	0.252475	0.489	0.194	0.0400524	1	4833412C05Rik
Dio2	7.94518e-06	0.276866	0.426	0.174	0.119781	1	Dio2
Ckm	1.34949e-05	0.263784	1	1	0.203449	1	Ckm
Frmd5	2.42888e-05	0.28557	0.681	0.388	0.366179	1	Frmd5
Des	3.18939e-05	0.258126	1	1	0.480833	1	Des
Gm5860	0.000110577	0.27504	0.596	0.334	1	1	Gm5860
Ankrd1	0.000119651	0.265097	1	1	1	1	Ankrd1
Cyp27a1	0.000167147	0.271136	0.511	0.278	1	1	Cyp27a1
Ttc39a	0.000266434	0.264244	0.574	0.347	1	1	Ttc39a
Prob1	0.00150439	0.268311	0.596	0.429	1	1	Prob1
Myh7	0.00430425	0.278609	1	1	1	1	Myh7
Tnnt11	2.41215e-21	0.938661	1	1	3.63655e-17	2	Tnnt1
Mb1	5.42322e-16	0.637238	1	1	8.17605e-12	2	Mb
Kcne11	1.06274e-10	0.483712	1	0.962	1.60219e-06	2	Kcne1
Haus81	9.16079e-08	0.332252	1	0.945	0.00138108	2	Haus8
Plekhh1	9.69071e-08	0.350067	0.723	0.35	0.00146097	2	Plekhh1
Alpk3	8.54759e-07	0.294415	0.979	0.94	0.0128863	2	Alpk3
Irx4	8.96428e-07	0.366163	1	0.831	0.0135145	2	Irx4
Poc1a	9.84298e-07	0.326037	0.872	0.515	0.0148393	2	Poc1a
Fhl2	1.01008e-06	0.296409	1	0.997	0.0152279	2	Fhl2
Sdcbp2	1.48769e-06	0.284436	0.383	0.133	0.0224284	2	Sdcbp2
Wdr54	2.57365e-06	0.273406	0.596	0.282	0.0388004	2	Wdr54
Gpr68	4.69665e-06	0.286603	0.532	0.238	0.0708067	2	Gpr68
E030024N20Rik	5.68988e-06	0.252299	0.362	0.127	0.0857806	2	E030024N20Rik
Rhox5	7.72635e-06	0.259308	0.596	0.281	0.116482	2	Rhox5
Pitx2	8.9077e-06	0.323604	0.851	0.544	0.134293	2	Pitx2
Rgs16	9.51062e-06	0.285438	0.532	0.247	0.143382	2	Rgs16
Larp1b	1.0712e-05	0.271404	0.681	0.353	0.161495	2	Larp1b
Prep	1.17623e-05	0.279502	1	0.969	0.177329	2	Prep
Gpr37	1.34174e-05	0.25186	0.404	0.16	0.202281	2	Gpr37
Myh7b	4.19612e-05	0.286846	1	0.948	0.632607	2	Myh7b
Ppp1r1b	4.24561e-05	0.282247	0.936	0.666	0.640067	2	Ppp1r1b
Pla2g161	5.13962e-05	0.271257	1	0.982	0.77485	2	Pla2g16
Prelid2	7.054e-05	0.30064	0.957	0.656	1	2	Prelid2
Lamc2	7.84108e-05	0.25239	0.894	0.676	1	2	Lamc2
Rapsn	0.000137275	0.259417	0.915	0.65	1	2	Rapsn
Aunip	0.000203148	0.263819	0.574	0.33	1	2	Aunip
Arhgdig	0.000290854	0.268871	0.489	0.278	1	2	Arhgdig
Fam78a	0.000290996	0.2682	0.915	0.744	1	2	Fam78a
Actn2	0.00168473	0.252386	1	1	1	2	Actn2
Map3k7cl	1.49247e-39	1.22957	0.977	0.214	2.25004e-35	3	Map3k7cl
Lmod1	1.62755e-35	1.52135	0.977	0.282	2.4537e-31	3	Lmod1
Col24a1	1.6552e-32	0.876024	0.814	0.141	2.49538e-28	3	Col24a1
Nupr1	5.69624e-29	1.75782	1	0.524	8.58766e-25	3	Nupr1
Synpo2	1.14771e-28	1.09017	0.953	0.282	1.73028e-24	3	Synpo2
Eln	4.82762e-28	2.44503	1	1	7.27812e-24	3	Eln
Fbln5	8.2897e-28	2.22818	1	0.997	1.24976e-23	3	Fbln5
Prdm6	9.47341e-28	1.42746	0.953	0.379	1.42821e-23	3	Prdm6
Adamts2	1.14846e-27	1.68155	1	0.737	1.73141e-23	3	Adamts2
Rgs4	1.32072e-27	1.28039	0.977	0.355	1.99111e-23	3	Rgs4
Nov	1.01946e-26	1.54847	0.977	0.513	1.53694e-22	3	Nov
Bgn	1.1511e-26	1.39164	1	1	1.7354e-22	3	Bgn
Tagln	1.22627e-26	2.04427	1	0.882	1.84872e-22	3	Tagln
Htra1	1.32839e-26	1.34075	1	0.953	2.00267e-22	3	Htra1
Igfbp7	1.34368e-26	1.49139	1	0.886	2.02573e-22	3	Igfbp7
Fbn1	1.91268e-26	1.23895	1	0.988	2.88355e-22	3	Fbn1
Ptprz1	2.196e-26	1.01513	0.837	0.215	3.3107e-22	3	Ptprz1
Heyl	3.15143e-26	1.30067	1	0.651	4.7511e-22	3	Heyl
Ltbp4	3.63324e-26	1.29842	1	1	5.47747e-22	3	Ltbp4
Csrp2	4.26676e-26	0.909471	1	1	6.43256e-22	3	Csrp2
Clca3a2	6.3582e-26	2.09514	0.977	0.437	9.58563e-22	3	Clca3a2
Lox	6.99735e-26	1.57723	1	0.833	1.05492e-21	3	Lox
Gpc6	8.78321e-26	1.41875	1	0.697	1.32416e-21	3	Gpc6
Pdgfrl	9.7111e-26	1.47261	1	0.627	1.46405e-21	3	Pdgfrl
Fbln2	9.77614e-26	1.4703	1	1	1.47385e-21	3	Fbln2
Fstl3	1.42796e-25	1.1592	1	0.8	2.15279e-21	3	Fstl3
Flna	1.60051e-25	1.03192	1	1	2.41293e-21	3	Flna
Rgs5	3.45848e-25	1.13898	0.791	0.205	5.21401e-21	3	Rgs5
Stom	3.54535e-25	1.16668	1	0.762	5.34497e-21	3	Stom
Ltbp3	8.90844e-25	1.09643	1	0.991	1.34304e-20	3	Ltbp3
Itga4	1.97962e-24	1.17189	0.93	0.317	2.98448e-20	3	Itga4
Jag1	2.51652e-24	1.3072	1	0.759	3.79391e-20	3	Jag1
Serpine1	4.24459e-24	0.993813	0.884	0.267	6.39914e-20	3	Serpine1
Actn1	4.661e-24	0.977921	1	0.989	7.02693e-20	3	Actn1
Cd200	5.02915e-24	1.13447	0.977	0.528	7.58194e-20	3	Cd200
Loxl1	5.03028e-24	1.25351	1	0.98	7.58365e-20	3	Loxl1
Mgp	6.35797e-24	1.41413	1	1	9.58528e-20	3	Mgp
Sfrp2	8.26649e-24	1.59011	1	0.983	1.24626e-19	3	Sfrp2
Plb1	1.41416e-23	0.879757	0.651	0.124	2.13199e-19	3	Plb1
Pls3	1.76221e-23	1.16799	1	0.92	2.65671e-19	3	Pls3
Antxr1	2.07888e-23	1.30364	1	0.775	3.13412e-19	3	Antxr1
Frzb	2.24306e-23	1.15917	0.953	0.443	3.38163e-19	3	Frzb
Notch3	2.28378e-23	1.20542	0.977	0.728	3.44303e-19	3	Notch3
Synpo	2.57684e-23	1.12763	1	0.868	3.88484e-19	3	Synpo
Osr1	2.78582e-23	1.32103	1	0.674	4.1999e-19	3	Osr1
Sost	3.60044e-23	1.75187	0.907	0.422	5.42803e-19	3	Sost
Pmepa1	6.83075e-23	0.918366	1	0.944	1.0298e-18	3	Pmepa1
Specc1	9.15596e-23	1.22364	0.977	0.619	1.38035e-18	3	Specc1
Fblim1	1.11184e-22	1.08929	1	0.971	1.6762e-18	3	Fblim1
Htra3	2.12211e-22	1.31341	0.977	0.669	3.1993e-18	3	Htra3
Mfap4	2.15498e-22	1.3065	1	0.977	3.24885e-18	3	Mfap4
Spon1	2.51568e-22	1.02517	1	0.983	3.79264e-18	3	Spon1
Colec10	2.69725e-22	0.341945	0.326	0.023	4.06637e-18	3	Colec10
Angptl2	3.00739e-22	1.02463	1	0.976	4.53394e-18	3	Angptl2
Ces2g	3.2435e-22	0.514404	0.605	0.102	4.8899e-18	3	Ces2g
Mmp23	3.64155e-22	0.895176	1	0.936	5.49001e-18	3	Mmp23
Fn1	4.15608e-22	0.840688	1	1	6.26571e-18	3	Fn1
Cxcl12	5.87188e-22	1.26106	1	0.998	8.85244e-18	3	Cxcl12
Tpm2	6.95432e-22	0.823387	1	1	1.04843e-17	3	Tpm2
Sdc3	9.65507e-22	0.87014	1	0.976	1.4556e-17	3	Sdc3
P4ha3	1.15586e-21	1.0775	0.977	0.733	1.74257e-17	3	P4ha3
Tub	1.62065e-21	0.864847	0.767	0.202	2.44329e-17	3	Tub
Tm4sf1	2.0367e-21	1.00294	1	0.967	3.07053e-17	3	Tm4sf1
Fhl1	2.21759e-21	0.892395	1	1	3.34323e-17	3	Fhl1
Fzd1	2.37709e-21	1.12294	1	0.894	3.5837e-17	3	Fzd1
Hotairm1	3.30397e-21	0.842256	0.907	0.276	4.98106e-17	3	Hotairm1
Itga9	3.72642e-21	0.920106	1	0.924	5.61796e-17	3	Itga9
Angpt2	6.14583e-21	1.2097	0.907	0.346	9.26545e-17	3	Angpt2
Cald1	7.91117e-21	0.999402	1	0.992	1.19269e-16	3	Cald1
Galnt16	8.45415e-21	1.05599	0.977	0.613	1.27455e-16	3	Galnt16
Ltbp2	9.81275e-21	0.999242	0.953	0.434	1.47937e-16	3	Ltbp2
Myl6	1.05357e-20	0.572925	1	1	1.58836e-16	3	Myl6
Efnb2	1.06257e-20	1.06424	1	0.803	1.60194e-16	3	Efnb2
Thbs2	1.0834e-20	1.29028	1	0.845	1.63333e-16	3	Thbs2
Adarb1	1.09296e-20	1.09056	0.953	0.7	1.64774e-16	3	Adarb1
Stx1a	1.21959e-20	1.05309	0.977	0.692	1.83866e-16	3	Stx1a
Kank1	1.24281e-20	0.886338	1	0.91	1.87366e-16	3	Kank1
Mir143hg	2.72454e-20	1.04863	1	0.756	4.10751e-16	3	Mir143hg
Acta2	4.2088e-20	0.696575	1	1	6.34519e-16	3	Acta2
Id3	6.43073e-20	0.787193	1	0.998	9.69497e-16	3	Id3
Itga8	6.79448e-20	0.89316	0.977	0.493	1.02434e-15	3	Itga8
Gm15867	8.18977e-20	0.67688	0.744	0.184	1.23469e-15	3	Gm15867
EYFP	9.27487e-20	1.31854	0.907	0.416	1.39828e-15	3	EYFP
Hmgcs2	1.07598e-19	1.07108	0.907	0.431	1.62214e-15	3	Hmgcs2
Efemp2	1.47037e-19	0.860949	1	0.917	2.21674e-15	3	Efemp2
Sparc	1.52313e-19	0.681364	1	1	2.29628e-15	3	Sparc
Gem	2.53544e-19	0.97879	0.86	0.335	3.82243e-15	3	Gem
Rcn3	2.90363e-19	0.76596	1	1	4.37752e-15	3	Rcn3
Eva1b	3.86126e-19	0.851461	1	0.941	5.82124e-15	3	Eva1b
Cspg4	3.953e-19	0.811081	1	0.935	5.95954e-15	3	Cspg4
Ptgis	4.93371e-19	0.895589	1	0.741	7.43806e-15	3	Ptgis
Lgals1	5.61873e-19	0.763454	1	1	8.4708e-15	3	Lgals1
Tmem158	9.46201e-19	1.27024	1	0.659	1.42649e-14	3	Tmem158
Fkbp10	9.95017e-19	0.680262	1	0.989	1.50009e-14	3	Fkbp10
Adamts1	1.23201e-18	0.876362	1	0.914	1.85738e-14	3	Adamts1
P3h3	1.2933e-18	0.889474	1	0.932	1.94978e-14	3	P3h3
Scarf2	1.34762e-18	0.874712	1	0.892	2.03167e-14	3	Scarf2
Cbr2	1.47276e-18	0.894789	0.86	0.332	2.22033e-14	3	Cbr2
Cdh3	1.81949e-18	0.906772	1	0.903	2.74307e-14	3	Cdh3
Art4	2.06433e-18	1.04767	0.953	0.564	3.11219e-14	3	Art4
Myh11	2.1061e-18	1.25338	0.977	0.601	3.17516e-14	3	Myh11
Pdgfrb	2.37288e-18	0.842376	1	0.883	3.57736e-14	3	Pdgfrb
Mmp2	2.37368e-18	0.759563	1	0.995	3.57856e-14	3	Mmp2
Smoc2	2.58523e-18	1.05413	1	0.748	3.89749e-14	3	Smoc2
Timp2	3.86601e-18	0.726211	1	0.997	5.8284e-14	3	Timp2
Mfap2	4.34882e-18	0.911639	1	0.991	6.55628e-14	3	Mfap2
Ctgf	5.04361e-18	1.13458	1	0.917	7.60374e-14	3	Ctgf
Dkk3	5.25336e-18	0.938193	1	0.941	7.91996e-14	3	Dkk3
Fstl1	6.68719e-18	0.933149	1	1	1.00816e-13	3	Fstl1
Pi15	8.54827e-18	0.77102	0.744	0.231	1.28874e-13	3	Pi15
Lgr6	2.13025e-17	0.513277	0.558	0.111	3.21156e-13	3	Lgr6
Tenm3	2.40785e-17	1.04183	0.977	0.704	3.63008e-13	3	Tenm3
Psd	2.44678e-17	0.866126	0.93	0.443	3.68876e-13	3	Psd
Dclk1	3.14256e-17	0.643269	0.953	0.351	4.73772e-13	3	Dclk1
Myh10	4.58216e-17	0.741597	1	1	6.90807e-13	3	Myh10
Prss35	4.64817e-17	0.811736	0.93	0.39	7.00758e-13	3	Prss35
Ace	7.9475e-17	0.753545	0.744	0.225	1.19817e-12	3	Ace
Ltbp1	1.14081e-16	1.0585	1	0.974	1.71989e-12	3	Ltbp1
Pamr1	1.2797e-16	0.823459	0.744	0.212	1.92928e-12	3	Pamr1
Snhg18	1.72469e-16	0.72516	1	0.932	2.60014e-12	3	Snhg18
Sema6c	2.40477e-16	0.797718	0.977	0.624	3.62544e-12	3	Sema6c
Pxdn	3.30991e-16	0.541056	1	1	4.99001e-12	3	Pxdn
Chst2	3.45376e-16	0.813766	0.93	0.577	5.20688e-12	3	Chst2
Kazald1	3.70457e-16	0.716773	0.767	0.278	5.58501e-12	3	Kazald1
Sdc1	3.86778e-16	0.690722	1	0.945	5.83106e-12	3	Sdc1
Hoxa1	4.41983e-16	0.507907	0.535	0.111	6.66333e-12	3	Hoxa1
Rcsd1	4.64318e-16	0.597564	1	0.985	7.00006e-12	3	Rcsd1
Lmna	4.68744e-16	0.659175	1	0.989	7.06679e-12	3	Lmna
Col6a3	4.79871e-16	0.910565	1	0.904	7.23453e-12	3	Col6a3
Tpm4	4.9048e-16	0.61275	1	0.997	7.39448e-12	3	Tpm4
Chpf	5.13702e-16	0.614135	1	0.964	7.74458e-12	3	Chpf
Sulf1	5.86034e-16	1.15876	1	0.865	8.83505e-12	3	Sulf1
Islr	5.93971e-16	1.00856	0.977	0.672	8.95471e-12	3	Islr
Col1a2	6.38009e-16	0.92871	1	1	9.61862e-12	3	Col1a2
Rrbp1	8.36828e-16	0.53635	1	1	1.2616e-11	3	Rrbp1
Casp12	1.04729e-15	0.62417	0.674	0.199	1.5789e-11	3	Casp12
Col5a1	1.05921e-15	0.822116	1	0.998	1.59687e-11	3	Col5a1
Mmp17	1.09652e-15	0.495931	0.628	0.155	1.65312e-11	3	Mmp17
Gpc4	1.10585e-15	0.759704	1	0.851	1.66718e-11	3	Gpc4
Wisp2	1.60724e-15	0.406852	0.395	0.059	2.42307e-11	3	Wisp2
F2rl1	1.82277e-15	0.492321	0.512	0.106	2.74801e-11	3	F2rl1
Cnn2	1.97878e-15	0.575609	1	1	2.9832e-11	3	Cnn2
Plekhg3	2.4207e-15	0.786876	1	0.845	3.64945e-11	3	Plekhg3
Adgrl2	2.45878e-15	0.753597	1	0.906	3.70685e-11	3	Adgrl2
Ckap4	2.73658e-15	0.620693	1	0.998	4.12567e-11	3	Ckap4
Vipr1	3.23037e-15	0.306608	0.326	0.039	4.8701e-11	3	Vipr1
Chst3	3.92958e-15	0.527318	0.651	0.181	5.92424e-11	3	Chst3
Gpx7	3.97013e-15	0.629366	1	0.954	5.98538e-11	3	Gpx7
Stac	4.91641e-15	0.508962	0.488	0.102	7.41199e-11	3	Stac
Adamts10	5.02043e-15	0.745528	1	0.918	7.5688e-11	3	Adamts10
Kcnk1	6.55003e-15	0.483691	0.651	0.171	9.87482e-11	3	Kcnk1
Zyx	7.1481e-15	0.540832	1	1	1.07765e-10	3	Zyx
Cmklr1	8.08397e-15	0.601548	0.605	0.161	1.21874e-10	3	Cmklr1
Bdnf	8.32011e-15	0.41864	0.465	0.086	1.25434e-10	3	Bdnf
Btg1	8.33683e-15	0.75976	1	0.991	1.25686e-10	3	Btg1
Emilin1	8.48523e-15	0.705827	1	0.994	1.27923e-10	3	Emilin1
Arpc1b	9.3477e-15	0.489378	1	0.995	1.40926e-10	3	Arpc1b
Cd34	1.27064e-14	0.866663	0.977	0.986	1.91562e-10	3	Cd34
Pianp	1.28392e-14	0.639054	0.86	0.347	1.93564e-10	3	Pianp
Rarres2	1.75009e-14	0.719451	1	0.801	2.63843e-10	3	Rarres2
Sntg2	1.77168e-14	0.513104	0.605	0.158	2.67098e-10	3	Sntg2
Olfml2b	2.27476e-14	0.73853	1	0.848	3.42943e-10	3	Olfml2b
Fgfr1	2.48282e-14	0.732451	1	0.915	3.74309e-10	3	Fgfr1
Dhrs3	2.56746e-14	0.855137	0.977	0.753	3.8707e-10	3	Dhrs3
St6gal1	2.90835e-14	0.830278	0.953	0.687	4.38463e-10	3	St6gal1
Acan	2.91835e-14	1.34884	0.837	0.425	4.3997e-10	3	Acan
Actg2	2.97836e-14	1.13387	1	0.687	4.49017e-10	3	Actg2
Cyp1b1	2.99179e-14	0.695671	0.698	0.203	4.51042e-10	3	Cyp1b1
Lama5	3.29901e-14	0.652663	1	0.982	4.97359e-10	3	Lama5
Actb	3.46409e-14	0.521909	1	1	5.22246e-10	3	Actb
Pde5a	3.52137e-14	0.627267	1	0.613	5.30882e-10	3	Pde5a
Aoc3	3.8375e-14	1.01976	0.814	0.436	5.78542e-10	3	Aoc3
Atp10a	3.85905e-14	0.59221	0.791	0.291	5.8179e-10	3	Atp10a
Ptrf	4.32982e-14	0.524754	1	1	6.52764e-10	3	Ptrf
Pkd1	4.37382e-14	0.711757	1	0.93	6.59397e-10	3	Pkd1
Cd63	4.74666e-14	0.419941	1	1	7.15607e-10	3	Cd63
Il11ra1	5.21697e-14	0.677073	1	0.956	7.8651e-10	3	Il11ra1
Emp3	5.45378e-14	0.624809	1	0.917	8.22212e-10	3	Emp3
Kcnab1	6.18568e-14	0.536323	0.488	0.111	9.32554e-10	3	Kcnab1
Foxc2	6.49605e-14	0.795709	0.884	0.622	9.79344e-10	3	Foxc2
Ntrk3	8.15281e-14	0.844116	0.744	0.303	1.22912e-09	3	Ntrk3
Ogn	9.23934e-14	0.848808	1	0.798	1.39292e-09	3	Ogn
Cabp1	9.44872e-14	0.482288	0.488	0.108	1.42449e-09	3	Cabp1
Sec61b	1.09242e-13	0.507553	1	0.998	1.64693e-09	3	Sec61b
Gata6	1.16291e-13	0.576182	1	0.974	1.75321e-09	3	Gata6
Gxylt2	1.28043e-13	0.782414	0.651	0.206	1.93038e-09	3	Gxylt2
Hspg2	1.40996e-13	0.443468	1	1	2.12565e-09	3	Hspg2
H19	1.45104e-13	0.513799	1	1	2.18759e-09	3	H19
Oprl1	1.72384e-13	0.447141	0.581	0.149	2.59886e-09	3	Oprl1
Itgb3	2.17064e-13	0.649113	0.884	0.388	3.27246e-09	3	Itgb3
Fam129b	2.27145e-13	0.629055	1	0.953	3.42443e-09	3	Fam129b
Tnfrsf11b	2.44069e-13	0.784975	0.442	0.094	3.67958e-09	3	Tnfrsf11b
Pdlim3	2.72237e-13	0.494421	1	0.98	4.10425e-09	3	Pdlim3
Kdelr3	2.83003e-13	0.630163	1	0.906	4.26655e-09	3	Kdelr3
Lrp1	2.89556e-13	0.703334	1	0.929	4.36535e-09	3	Lrp1
Alcam	2.94669e-13	0.683014	0.977	0.851	4.44243e-09	3	Alcam
Glipr1	3.93611e-13	0.603676	0.651	0.219	5.93407e-09	3	Glipr1
P4hb	3.97761e-13	0.519752	1	1	5.99664e-09	3	P4hb
Cyr61	4.38387e-13	0.895231	0.953	0.7	6.60912e-09	3	Cyr61
Cav11	4.40642e-13	0.633542	1	0.991	6.64311e-09	3	Cav1
Fjx1	4.87024e-13	0.702862	0.791	0.303	7.34238e-09	3	Fjx1
Gkn3	5.60632e-13	0.417523	0.488	0.111	8.45209e-09	3	Gkn3
Smtn	7.30086e-13	0.592449	1	0.994	1.10068e-08	3	Smtn
Actg1	9.03385e-13	0.419746	1	1	1.36194e-08	3	Actg1
Vasn	1.06714e-12	0.666793	1	0.804	1.60883e-08	3	Vasn
Astn2	1.14526e-12	0.45459	0.512	0.123	1.72659e-08	3	Astn2
Slit3	1.43802e-12	0.882313	0.93	0.615	2.16797e-08	3	Slit3
Ccdc80	1.627e-12	0.834093	1	0.979	2.45286e-08	3	Ccdc80
Nfix	1.64687e-12	0.61218	1	0.853	2.48283e-08	3	Nfix
Mrc2	1.70508e-12	0.750031	0.977	0.8	2.57059e-08	3	Mrc2
Adamts15	1.74656e-12	0.648438	0.977	0.698	2.63311e-08	3	Adamts15
Ddr2	1.81109e-12	0.640512	0.977	0.608	2.73039e-08	3	Ddr2
Rcn1	2.00215e-12	0.452786	1	1	3.01844e-08	3	Rcn1
Filip1l	2.00521e-12	0.643397	0.953	0.737	3.02305e-08	3	Filip1l
Picalm	2.29622e-12	0.488773	1	0.995	3.46178e-08	3	Picalm
Rasl11a	2.48825e-12	0.817746	0.791	0.367	3.75129e-08	3	Rasl11a
Gfra1	2.87909e-12	0.724671	0.86	0.423	4.34052e-08	3	Gfra1
Hs6st2	2.92097e-12	0.712877	0.907	0.615	4.40365e-08	3	Hs6st2
Sh3bgrl	2.92988e-12	0.472825	1	0.971	4.41709e-08	3	Sh3bgrl
Tmsb4x	2.95217e-12	0.418156	1	1	4.45068e-08	3	Tmsb4x
Dap	3.0287e-12	0.604516	1	0.941	4.56607e-08	3	Dap
Ptprs	3.24988e-12	0.419786	1	0.998	4.89953e-08	3	Ptprs
Lrrc17	3.95686e-12	0.726587	0.953	0.643	5.96536e-08	3	Lrrc17
Fbn2	4.17137e-12	0.580893	1	0.998	6.28876e-08	3	Fbn2
Csrp1	5.4411e-12	0.51132	1	0.998	8.20301e-08	3	Csrp1
Kctd12	6.93589e-12	0.715148	1	0.942	1.04566e-07	3	Kctd12
Tmem132a	7.22414e-12	0.402106	1	1	1.08911e-07	3	Tmem132a
Tsc22d1	7.81035e-12	0.672895	1	1	1.17749e-07	3	Tsc22d1
Ntrk2	8.48593e-12	0.595105	0.93	0.492	1.27934e-07	3	Ntrk2
Efna5	8.95512e-12	0.680343	0.977	0.757	1.35007e-07	3	Efna5
Rhbdf1	1.04502e-11	0.54803	1	0.932	1.57547e-07	3	Rhbdf1
Tpst1	1.32657e-11	0.60268	0.953	0.751	1.99994e-07	3	Tpst1
C1qtnf6	1.58225e-11	0.491199	1	0.974	2.3854e-07	3	C1qtnf6
Rbp1	1.63724e-11	0.605155	1	0.995	2.4683e-07	3	Rbp1
Fam13c	1.68976e-11	0.730881	0.698	0.307	2.54749e-07	3	Fam13c
Kcnip4	1.71565e-11	0.297373	0.256	0.033	2.58651e-07	3	Kcnip4
Hoxa3	1.996e-11	0.572857	0.791	0.343	3.00917e-07	3	Hoxa3
Rpn2	2.02339e-11	0.361454	1	1	3.05046e-07	3	Rpn2
H1f0	2.0832e-11	0.430533	1	1	3.14063e-07	3	H1f0
Zfhx3	2.16425e-11	0.747297	0.884	0.618	3.26282e-07	3	Zfhx3
Tulp1	2.18688e-11	0.359903	0.581	0.168	3.29694e-07	3	Tulp1
Tmem18	2.56148e-11	0.546965	0.884	0.613	3.86169e-07	3	Tmem18
Sdc2	2.60178e-11	0.555541	0.977	0.882	3.92245e-07	3	Sdc2
Serpinh1	2.65343e-11	0.460681	1	1	4.00032e-07	3	Serpinh1
Marveld1	3.04719e-11	0.492404	0.977	0.976	4.59394e-07	3	Marveld1
Cpe	3.09121e-11	0.49484	1	0.998	4.66031e-07	3	Cpe
Vgll3	3.11732e-11	0.417888	0.512	0.141	4.69967e-07	3	Vgll3
Pdlim7	3.29796e-11	0.362119	1	1	4.972e-07	3	Pdlim7
Syt11	3.32531e-11	0.639425	0.884	0.608	5.01323e-07	3	Syt11
Slc9a3r1	3.47857e-11	0.722943	0.884	0.596	5.2443e-07	3	Slc9a3r1
Pkdcc	3.57653e-11	0.647205	1	0.98	5.39197e-07	3	Pkdcc
Colgalt1	3.67557e-11	0.505832	1	0.992	5.54129e-07	3	Colgalt1
Ehd2	3.7602e-11	0.503273	1	0.889	5.66888e-07	3	Ehd2
Adam19	3.96498e-11	0.597896	0.977	0.964	5.9776e-07	3	Adam19
Nmnat2	4.2573e-11	0.289249	0.419	0.093	6.4183e-07	3	Nmnat2
Col14a1	4.89178e-11	0.722546	0.977	0.774	7.37485e-07	3	Col14a1
Ppic	5.27834e-11	0.506618	1	1	7.95763e-07	3	Ppic
Ccdc68	5.6444e-11	0.406032	0.395	0.09	8.5095e-07	3	Ccdc68
Fam114a1	6.15782e-11	0.611467	1	0.819	9.28353e-07	3	Fam114a1
Thbd	7.00972e-11	0.655733	0.953	0.718	1.05679e-06	3	Thbd
Tmem26	8.21454e-11	0.689647	0.837	0.388	1.23842e-06	3	Tmem26
Slc12a2	9.44209e-11	0.645511	0.977	0.948	1.42349e-06	3	Slc12a2
H3f3b	9.81597e-11	0.405092	1	1	1.47986e-06	3	H3f3b
Gpx8	1.0089e-10	0.435915	1	0.992	1.52101e-06	3	Gpx8
Sertad4	1.02823e-10	0.643586	0.86	0.689	1.55016e-06	3	Sertad4
Brinp1	1.03203e-10	0.691122	0.767	0.344	1.55589e-06	3	Brinp1
Col1a1	1.18453e-10	0.658209	1	0.991	1.7858e-06	3	Col1a1
Trim47	1.23558e-10	0.493798	1	0.973	1.86276e-06	3	Trim47
Tagln2	1.27628e-10	0.37471	1	0.998	1.92413e-06	3	Tagln2
Wtip	1.30224e-10	0.517943	1	0.93	1.96326e-06	3	Wtip
Arhgef25	1.31388e-10	0.648125	0.953	0.842	1.98081e-06	3	Arhgef25
Qsox1	1.48318e-10	0.615992	1	0.936	2.23604e-06	3	Qsox1
Lmo1	1.58162e-10	0.383309	0.512	0.143	2.38444e-06	3	Lmo1
Col16a1	1.63924e-10	0.562922	1	0.929	2.47132e-06	3	Col16a1
Lrrc59	1.64886e-10	0.406295	1	0.992	2.48583e-06	3	Lrrc59
Ano1	2.00191e-10	0.875557	0.721	0.378	3.01807e-06	3	Ano1
Shisa4	2.13722e-10	0.564163	0.814	0.429	3.22208e-06	3	Shisa4
Sh3pxd2a	2.72094e-10	0.511007	1	0.985	4.10209e-06	3	Sh3pxd2a
Mrvi1	2.72707e-10	0.538642	0.837	0.413	4.11133e-06	3	Mrvi1
Crym	2.78295e-10	0.57725	0.488	0.143	4.19557e-06	3	Crym
Gm13889	3.0217e-10	0.753841	0.907	0.665	4.55551e-06	3	Gm13889
Gp1bb	3.09317e-10	0.56047	0.651	0.258	4.66327e-06	3	Gp1bb
Slc15a2	3.19147e-10	0.403172	0.558	0.176	4.81145e-06	3	Slc15a2
Plekhg2	3.2133e-10	0.465763	1	0.967	4.84437e-06	3	Plekhg2
Col3a1	3.81635e-10	0.71287	1	1	5.75353e-06	3	Col3a1
Mecom	4.00823e-10	0.553391	0.953	0.621	6.04281e-06	3	Mecom
Cdr2	4.01091e-10	0.530293	0.977	0.675	6.04685e-06	3	Cdr2
Afap1l2	4.02454e-10	0.44395	0.581	0.191	6.0674e-06	3	Afap1l2
Clca3a1	4.03026e-10	0.985166	0.977	0.821	6.07603e-06	3	Clca3a1
Bmp4	4.15825e-10	0.756252	0.86	0.575	6.26898e-06	3	Bmp4
Zdhhc14	4.86081e-10	0.440612	0.558	0.185	7.32816e-06	3	Zdhhc14
Ppp1r14a	5.17254e-10	0.64568	0.86	0.605	7.79813e-06	3	Ppp1r14a
Snx18	5.17884e-10	0.639327	0.977	0.88	7.80762e-06	3	Snx18
Map1b	5.3193e-10	0.551993	1	0.977	8.01938e-06	3	Map1b
Agrn	5.34834e-10	0.414955	1	1	8.06316e-06	3	Agrn
Map6	6.09317e-10	0.455759	0.628	0.243	9.18607e-06	3	Map6
Stx5a	6.129e-10	0.428401	1	0.968	9.24008e-06	3	Stx5a
Itgav	6.18457e-10	0.516121	1	0.941	9.32385e-06	3	Itgav
Abcc1	6.31981e-10	0.531188	0.698	0.276	9.52775e-06	3	Abcc1
Slc39a7	6.41276e-10	0.383586	1	0.997	9.66787e-06	3	Slc39a7
Mlec	7.19419e-10	0.382107	1	1	1.0846e-05	3	Mlec
Igsf3	7.68951e-10	0.535572	1	0.954	1.15927e-05	3	Igsf3
Rasl11b	8.18419e-10	0.45776	1	0.948	1.23385e-05	3	Rasl11b
Foxc1	8.5031e-10	0.669151	0.907	0.733	1.28193e-05	3	Foxc1
Vkorc1	8.51296e-10	0.441629	1	0.988	1.28341e-05	3	Vkorc1
Ctnnd2	9.32129e-10	0.288536	0.419	0.105	1.40528e-05	3	Ctnnd2
Nxn	9.35311e-10	0.461772	1	0.956	1.41007e-05	3	Nxn
Ntf3	9.39592e-10	0.430695	0.535	0.171	1.41653e-05	3	Ntf3
Gadd45b	9.66488e-10	0.549855	0.953	0.876	1.45708e-05	3	Gadd45b
Gabarap	9.83155e-10	0.295701	1	1	1.4822e-05	3	Gabarap
Adamts17	1.15201e-09	0.639088	0.86	0.499	1.73678e-05	3	Adamts17
Axl	1.19873e-09	0.454817	0.953	0.942	1.80721e-05	3	Axl
Arhgdia	1.31431e-09	0.262587	1	1	1.98146e-05	3	Arhgdia
Ptbp1	1.45058e-09	0.35987	1	1	2.1869e-05	3	Ptbp1
Wisp1	1.53438e-09	0.600045	0.93	0.78	2.31324e-05	3	Wisp1
Uba2	1.56793e-09	0.44433	1	0.965	2.36381e-05	3	Uba2
Megf61	1.5939e-09	0.5832	0.977	0.938	2.40296e-05	3	Megf6
Shisa3	1.71828e-09	0.35928	0.837	0.373	2.59048e-05	3	Shisa3
Notch2	1.96891e-09	0.574974	0.953	0.827	2.96833e-05	3	Notch2
Dbn1	2.31796e-09	0.450626	1	0.977	3.49456e-05	3	Dbn1
Crip1	2.42938e-09	0.389972	1	1	3.66253e-05	3	Crip1
Myl9	2.46425e-09	0.328427	1	1	3.7151e-05	3	Myl9
Nrep	2.65117e-09	0.473195	1	1	3.9969e-05	3	Nrep
Fads1	2.67574e-09	0.475447	1	0.941	4.03395e-05	3	Fads1
Sulf2	2.73576e-09	0.53209	1	1	4.12443e-05	3	Sulf2
Col27a1	2.76728e-09	0.458042	0.953	0.598	4.17196e-05	3	Col27a1
S100a11	3.00815e-09	0.404234	1	1	4.53508e-05	3	S100a11
Mmp16	3.59203e-09	0.574146	0.791	0.381	5.41534e-05	3	Mmp16
Chmp2b	3.72637e-09	0.575006	1	0.9	5.61788e-05	3	Chmp2b
Tkt	3.75968e-09	0.407437	1	0.967	5.6681e-05	3	Tkt
Fam20a	3.96133e-09	0.311062	0.512	0.158	5.9721e-05	3	Fam20a
Thrb	4.01351e-09	0.290079	0.256	0.044	6.05076e-05	3	Thrb
Capn2	4.03505e-09	0.35285	1	0.991	6.08325e-05	3	Capn2
Coro1c	4.30967e-09	0.359605	1	0.997	6.49725e-05	3	Coro1c
Myrf	4.34821e-09	0.530674	0.93	0.677	6.55536e-05	3	Myrf
Ggta1	4.36813e-09	0.520834	0.93	0.786	6.58539e-05	3	Ggta1
Nrarp	4.42723e-09	0.618483	0.884	0.686	6.67449e-05	3	Nrarp
Csdc2	4.56602e-09	0.477063	0.605	0.238	6.88373e-05	3	Csdc2
Cttn	4.62612e-09	0.42255	1	0.991	6.97433e-05	3	Cttn
Kcne4	5.20114e-09	0.380658	0.512	0.159	7.84123e-05	3	Kcne4
Anxa5	5.31249e-09	0.403218	1	1	8.00911e-05	3	Anxa5
Cercam	5.58382e-09	0.604983	0.907	0.643	8.41816e-05	3	Cercam
Vcl	5.70539e-09	0.467827	1	0.998	8.60145e-05	3	Vcl
2310022B05Rik	5.79859e-09	0.437393	1	1	8.74196e-05	3	2310022B05Rik
Sh3pxd2b	5.98789e-09	0.566997	1	0.906	9.02734e-05	3	Sh3pxd2b
Srpr	6.17468e-09	0.409463	1	0.956	9.30895e-05	3	Srpr
Atp1b2	6.22683e-09	0.586395	0.907	0.756	9.38757e-05	3	Atp1b2
Slc1a4	6.32127e-09	0.577619	0.86	0.636	9.52995e-05	3	Slc1a4
Srgap3	7.20459e-09	0.478763	0.651	0.282	0.000108616	3	Srgap3
Arhgef40	7.36652e-09	0.521804	1	0.939	0.000111058	3	Arhgef40
Il6st	7.78955e-09	0.471658	1	0.988	0.000117435	3	Il6st
Pde1a	8.22013e-09	0.689303	0.814	0.552	0.000123927	3	Pde1a
C2cd2	8.28021e-09	0.549792	0.884	0.698	0.000124832	3	C2cd2
Dchs1	8.97219e-09	0.505139	1	0.921	0.000135265	3	Dchs1
Endod1	9.41831e-09	0.501165	0.86	0.528	0.00014199	3	Endod1
Fndc3b	9.70403e-09	0.531543	1	0.891	0.000146298	3	Fndc3b
Dnajc3	1.0494e-08	0.453221	0.977	0.923	0.000158208	3	Dnajc3
Cdon	1.07562e-08	0.564882	0.977	0.883	0.000162161	3	Cdon
Arfgap1	1.08325e-08	0.447551	0.977	0.95	0.000163311	3	Arfgap1
Lrig3	1.08402e-08	0.461598	0.605	0.25	0.000163427	3	Lrig3
Tmed9	1.08769e-08	0.340848	1	1	0.00016398	3	Tmed9
Hdac7	1.11772e-08	0.422986	0.977	0.936	0.000168507	3	Hdac7
Gorasp2	1.17768e-08	0.354356	1	0.992	0.000177547	3	Gorasp2
Tmem165	1.20313e-08	0.474059	1	0.982	0.000181383	3	Tmem165
Calu	1.21846e-08	0.374333	1	1	0.000183695	3	Calu
Sec24d	1.40528e-08	0.56056	0.977	0.915	0.00021186	3	Sec24d
Tanc2	1.41517e-08	0.490276	0.977	0.863	0.00021335	3	Tanc2
Thsd4	1.68453e-08	0.652976	0.86	0.514	0.000253959	3	Thsd4
Lhfp	1.716e-08	0.504207	1	0.958	0.000258704	3	Lhfp
Thbs3	1.80164e-08	0.536358	0.884	0.727	0.000271615	3	Thbs3
Parva	1.86631e-08	0.354338	1	0.994	0.000281366	3	Parva
Chpf2	2.10834e-08	0.468624	1	0.745	0.000317854	3	Chpf2
Clip3	2.14864e-08	0.495435	0.977	0.756	0.000323928	3	Clip3
Myof	2.19925e-08	0.488093	0.791	0.425	0.000331559	3	Myof
P3h4	2.23717e-08	0.419568	1	0.961	0.000337276	3	P3h4
Tgfb3	2.26942e-08	0.463662	0.953	0.713	0.000342137	3	Tgfb3
Col22a1	2.45957e-08	0.274217	0.279	0.058	0.000370805	3	Col22a1
Pdia5	2.45983e-08	0.585468	0.977	0.772	0.000370844	3	Pdia5
Iqgap1	2.46942e-08	0.407654	1	0.956	0.00037229	3	Iqgap1
Dnajb4	2.48358e-08	0.5002	0.977	0.809	0.000374424	3	Dnajb4
Tro	2.55543e-08	0.477112	1	0.883	0.000385257	3	Tro
Clmp	2.75476e-08	0.355524	0.558	0.196	0.000415307	3	Clmp
Kank4	2.78862e-08	0.458191	0.814	0.446	0.000420412	3	Kank4
Galnt2	2.85911e-08	0.48512	0.977	0.97	0.000431039	3	Galnt2
Praf2	2.96449e-08	0.525316	0.953	0.801	0.000446927	3	Praf2
Copz2	3.0214e-08	0.490944	1	0.965	0.000455507	3	Copz2
Sec61a1	3.39651e-08	0.32802	1	0.994	0.000512058	3	Sec61a1
Kdelr2	3.41735e-08	0.388828	1	0.995	0.000515199	3	Kdelr2
Wsb1	3.44116e-08	0.457814	1	0.986	0.000518789	3	Wsb1
Nacad	4.21149e-08	0.31388	0.395	0.112	0.000634924	3	Nacad
Btc	4.57666e-08	0.293215	0.372	0.1	0.000689978	3	Btc
Thsd7b	4.71602e-08	0.281582	0.326	0.079	0.000710987	3	Thsd7b
Qpct	5.41911e-08	0.628147	0.674	0.376	0.000816984	3	Qpct
Cacnb3	5.42385e-08	0.484097	0.884	0.792	0.0008177	3	Cacnb3
Cbx6	5.56327e-08	0.402161	1	0.994	0.000838718	3	Cbx6
Xbp1	5.61602e-08	0.383635	1	0.982	0.000846671	3	Xbp1
Pmp22	5.62805e-08	0.51679	1	0.933	0.000848485	3	Pmp22
Dnm3os	5.73228e-08	0.446375	0.907	0.69	0.000864198	3	Dnm3os
Eef2k	5.74487e-08	0.490904	0.93	0.712	0.000866097	3	Eef2k
Gfra4	6.13979e-08	0.294658	0.512	0.178	0.000925635	3	Gfra4
Srm	6.26013e-08	0.352064	1	0.985	0.000943777	3	Srm
Maged1	6.31826e-08	0.326764	1	1	0.000952542	3	Maged1
Lgals7	6.36268e-08	0.414118	0.698	0.311	0.000959238	3	Lgals7
Tvp23a	7.00071e-08	0.367749	0.605	0.241	0.00105543	3	Tvp23a
Gas5	7.18706e-08	0.306558	1	1	0.00108352	3	Gas5
Ssfa2	7.21266e-08	0.539033	0.837	0.595	0.00108738	3	Ssfa2
Tmem196	7.53564e-08	0.252985	0.302	0.07	0.00113607	3	Tmem196
Nfic	7.59615e-08	0.438288	1	0.924	0.0011452	3	Nfic
Dlg2	7.60831e-08	0.41889	0.674	0.32	0.00114703	3	Dlg2
Ppap2a	8.14416e-08	0.499384	0.977	0.883	0.00122781	3	Ppap2a
Pgrmc1	8.38767e-08	0.376706	1	0.991	0.00126453	3	Pgrmc1
Nedd9	8.42886e-08	0.571682	0.884	0.622	0.00127074	3	Nedd9
Bmp1	8.49543e-08	0.43369	1	0.989	0.00128077	3	Bmp1
Wbscr17	8.50839e-08	0.339927	0.558	0.212	0.00128273	3	Wbscr17
Srpx2	8.52392e-08	0.481128	0.581	0.247	0.00128507	3	Srpx2
Fndc4	8.93684e-08	0.465679	0.93	0.801	0.00134732	3	Fndc4
Lman1	1.02421e-07	0.433645	1	0.97	0.0015441	3	Lman1
Crtap	1.03372e-07	0.386039	0.977	0.995	0.00155844	3	Crtap
Stt3a	1.09608e-07	0.411425	0.977	0.958	0.00165246	3	Stt3a
Micu3	1.09664e-07	0.465425	0.674	0.328	0.0016533	3	Micu3
Rps6ka4	1.12618e-07	0.46999	0.907	0.716	0.00169783	3	Rps6ka4
Inafm1	1.13419e-07	0.458465	0.977	0.745	0.00170991	3	Inafm1
Rin2	1.20487e-07	0.490353	0.884	0.683	0.00181646	3	Rin2
Akap12	1.24861e-07	0.430456	1	0.973	0.0018824	3	Akap12
Ctsh	1.26512e-07	0.556698	0.953	0.716	0.00190729	3	Ctsh
Stk32b	1.32114e-07	0.266008	0.349	0.093	0.00199175	3	Stk32b
Clstn1	1.33997e-07	0.369889	0.977	0.98	0.00202014	3	Clstn1
Cd55	1.44568e-07	0.563255	0.651	0.319	0.00217951	3	Cd55
Adamts5	1.49432e-07	0.646412	0.86	0.651	0.00225284	3	Adamts5
Cd276	1.67577e-07	0.442217	0.93	0.921	0.00252639	3	Cd276
Cthrc1	1.79938e-07	0.614991	0.884	0.586	0.00271274	3	Cthrc1
Tmem184b	1.80894e-07	0.461231	0.977	0.968	0.00272716	3	Tmem184b
Impa1	1.82393e-07	0.353327	0.953	0.907	0.00274976	3	Impa1
Foxp2	1.83945e-07	0.586048	0.791	0.525	0.00277315	3	Foxp2
Cabin1	1.84201e-07	0.443133	0.977	0.914	0.00277701	3	Cabin1
Col5a2	2.0476e-07	0.382059	1	0.998	0.00308696	3	Col5a2
Ssr2	2.10831e-07	0.309581	1	1	0.00317849	3	Ssr2
Id4	2.21803e-07	0.424615	0.535	0.22	0.0033439	3	Id4
Golim4	2.28542e-07	0.53509	0.93	0.883	0.0034455	3	Golim4
Tbc1d9	2.44958e-07	0.345021	0.628	0.281	0.00369299	3	Tbc1d9
Tpm3	2.49035e-07	0.307316	1	1	0.00375445	3	Tpm3
Frmd4b	2.79137e-07	0.469956	0.86	0.569	0.00420826	3	Frmd4b
Hnrnpa2b1	2.87802e-07	0.315091	1	1	0.0043389	3	Hnrnpa2b1
Ski	3.22883e-07	0.393381	1	0.992	0.00486779	3	Ski
Cnn1	3.25067e-07	0.4988	1	0.997	0.00490071	3	Cnn1
Tgfb2	3.36649e-07	0.557074	0.86	0.653	0.00507532	3	Tgfb2
Cpxm1	3.44661e-07	0.490865	0.977	0.76	0.00519611	3	Cpxm1
Scube1	3.51851e-07	0.552708	0.837	0.584	0.0053045	3	Scube1
Selm	3.60403e-07	0.336707	1	0.997	0.00543343	3	Selm
F2r	3.70591e-07	0.424245	1	0.989	0.00558703	3	F2r
Dnajc10	3.70992e-07	0.394917	0.977	0.983	0.00559307	3	Dnajc10
Tnks1bp1	3.7236e-07	0.395501	0.93	0.809	0.0056137	3	Tnks1bp1
Nuak1	3.84345e-07	0.414374	0.581	0.252	0.00579438	3	Nuak1
Itgb5	3.8774e-07	0.369885	1	0.991	0.00584557	3	Itgb5
Ilk	3.97646e-07	0.290971	1	1	0.00599491	3	Ilk
Rimklb	4.01277e-07	0.302178	0.512	0.187	0.00604965	3	Rimklb
Ganab	4.13101e-07	0.323306	1	0.994	0.00622791	3	Ganab
Maged2	4.27726e-07	0.327821	1	1	0.0064484	3	Maged2
Atp8b2	4.38761e-07	0.417791	0.977	0.809	0.00661477	3	Atp8b2
Pisd-ps1	4.56498e-07	0.409531	0.977	0.971	0.00688216	3	Pisd-ps1
B3gnt9	4.58731e-07	0.614775	0.791	0.533	0.00691582	3	B3gnt9
Dst	4.8218e-07	0.38097	1	0.976	0.00726934	3	Dst
Ggcx	4.86893e-07	0.468343	0.86	0.639	0.00734039	3	Ggcx
Lsm11	5.11399e-07	0.439068	0.907	0.656	0.00770986	3	Lsm11
Cox4i2	5.15997e-07	0.391847	0.791	0.46	0.00777917	3	Cox4i2
Rexo2	5.40346e-07	0.398143	1	0.961	0.00814626	3	Rexo2
Ebf4	5.48196e-07	0.415426	0.651	0.311	0.00826461	3	Ebf4
Matn2	5.51542e-07	0.543995	0.837	0.586	0.00831504	3	Matn2
Itga7	5.52686e-07	0.394528	0.581	0.264	0.00833229	3	Itga7
2410006H16Rik	5.53717e-07	0.311096	1	0.997	0.00834783	3	2410006H16Rik
Slc7a2	5.64458e-07	0.56456	0.628	0.331	0.00850977	3	Slc7a2
Nktr	5.71336e-07	0.339206	1	0.959	0.00861346	3	Nktr
Hoxb2	5.72953e-07	0.472802	0.721	0.36	0.00863784	3	Hoxb2
2022-09-08	5.78613e-07	0.412209	0.977	0.951	0.00872317	3	2022-09-08
Adgrl1	6.18172e-07	0.377357	1	0.944	0.00931955	3	Adgrl1
Cav2	6.34833e-07	0.47003	0.907	0.63	0.00957075	3	Cav2
Rab34	6.36887e-07	0.399202	1	0.912	0.00960171	3	Rab34
Aldh18a1	6.46947e-07	0.46776	0.977	0.871	0.00975338	3	Aldh18a1
Spats2l	6.52137e-07	0.440224	0.93	0.797	0.00983162	3	Spats2l
Meg3	6.6177e-07	0.269368	1	1	0.00997685	3	Meg3
Msrb3	7.02757e-07	0.482075	0.977	0.954	0.0105948	3	Msrb3
Pdgfc	7.16015e-07	0.431413	0.744	0.428	0.0107946	3	Pdgfc
H6pd	7.42913e-07	0.394955	0.907	0.744	0.0112002	3	H6pd
Ephb2	7.70895e-07	0.40892	0.698	0.395	0.011622	3	Ephb2
Id1	7.99007e-07	0.314626	1	0.959	0.0120458	3	Id1
Pth1r	7.99871e-07	0.383792	0.977	0.882	0.0120588	3	Pth1r
St3gal5	8.0658e-07	0.496079	0.953	0.845	0.01216	3	St3gal5
6330403K07Rik	8.20915e-07	0.494749	1	0.819	0.0123761	3	6330403K07Rik
Il1r1	8.28661e-07	0.420032	0.674	0.36	0.0124929	3	Il1r1
Hmgn1	8.34344e-07	0.273699	1	1	0.0125786	3	Hmgn1
Golt1b	8.43839e-07	0.390839	0.977	0.941	0.0127217	3	Golt1b
Cnn3	8.89928e-07	0.382738	1	1	0.0134166	3	Cnn3
Smim3	9.17743e-07	0.488653	0.791	0.469	0.0138359	3	Smim3
Pcsk5	9.33615e-07	0.433684	0.814	0.498	0.0140752	3	Pcsk5
Phgdh	9.52168e-07	0.419519	1	0.92	0.0143549	3	Phgdh
Vav3	9.62986e-07	0.44119	0.744	0.413	0.014518	3	Vav3
Ehd1	1.00074e-06	0.291676	1	0.989	0.0150871	3	Ehd1
Dhh	1.05483e-06	0.341924	0.419	0.146	0.0159026	3	Dhh
Hdlbp	1.09449e-06	0.316203	1	0.998	0.0165006	3	Hdlbp
D430019H16Rik	1.2034e-06	0.547566	0.721	0.401	0.0181425	3	D430019H16Rik
Rab3b	1.28106e-06	0.292019	0.302	0.085	0.0193133	3	Rab3b
Plcb1	1.29538e-06	0.305619	0.419	0.146	0.0195291	3	Plcb1
Hnrnph1	1.31517e-06	0.304183	1	1	0.0198275	3	Hnrnph1
Lrrc75b	1.31976e-06	0.312058	0.395	0.134	0.0198967	3	Lrrc75b
Cd248	1.34768e-06	0.386417	1	0.781	0.0203177	3	Cd248
Ccdc102a	1.36239e-06	0.39037	0.884	0.83	0.0205393	3	Ccdc102a
Tmem45a	1.49167e-06	0.364505	0.721	0.404	0.0224884	3	Tmem45a
Bambi	1.55507e-06	0.427455	1	0.968	0.0234442	3	Bambi
Mmp11	1.5582e-06	0.448411	0.907	0.775	0.0234914	3	Mmp11
Wwtr1	1.7774e-06	0.424527	1	0.923	0.026796	3	Wwtr1
Dact1	1.80153e-06	0.521546	0.907	0.712	0.0271598	3	Dact1
Wnt5b	1.81976e-06	0.479988	0.721	0.436	0.0274347	3	Wnt5b
Efs	1.83134e-06	0.419784	0.953	0.797	0.0276093	3	Efs
Lpcat2	1.88404e-06	0.280803	0.442	0.162	0.0284037	3	Lpcat2
Skap2	1.88929e-06	0.388931	0.791	0.47	0.0284829	3	Skap2
P3h1	1.92344e-06	0.393832	1	0.973	0.0289978	3	P3h1
Rhoj	2.02953e-06	0.517693	0.93	0.792	0.0305972	3	Rhoj
Bcar3	2.13066e-06	0.350749	0.419	0.158	0.0321219	3	Bcar3
Slc24a5	2.14678e-06	0.30946	0.488	0.191	0.0323649	3	Slc24a5
Inhbb	2.21513e-06	0.267001	0.372	0.123	0.0333953	3	Inhbb
Flnb	2.23718e-06	0.391495	0.953	0.91	0.0337277	3	Flnb
Tmem167	2.29595e-06	0.297287	1	0.994	0.0346137	3	Tmem167
Dusp1	2.3097e-06	0.362601	0.953	0.737	0.034821	3	Dusp1
Hpcal4	2.32348e-06	0.254387	0.279	0.074	0.0350288	3	Hpcal4
Mxra8	2.41868e-06	0.436859	1	0.842	0.036464	3	Mxra8
Sar1a	2.43446e-06	0.305986	1	1	0.0367018	3	Sar1a
Fah	2.43855e-06	0.278093	0.674	0.316	0.0367636	3	Fah
Lsp11	2.56146e-06	0.396767	1	0.976	0.0386166	3	Lsp1
Tm9sf3	2.61683e-06	0.371776	1	1	0.0394513	3	Tm9sf3
Foxs1	2.66648e-06	0.327093	0.558	0.252	0.0401998	3	Foxs1
Rnpep	2.66679e-06	0.355498	1	0.8	0.0402045	3	Rnpep
Eml4	2.69963e-06	0.516757	0.907	0.842	0.0406997	3	Eml4
Siva1	2.78804e-06	0.297384	1	0.995	0.0420325	3	Siva1
Dpt	2.79315e-06	0.61387	0.814	0.578	0.0421095	3	Dpt
Adamts14	2.83058e-06	0.391032	0.651	0.323	0.0426738	3	Adamts14
Ncor2	2.94386e-06	0.337917	0.977	0.93	0.0443816	3	Ncor2
Mafk	2.97644e-06	0.499439	0.837	0.646	0.0448728	3	Mafk
Sipa1l2	3.03558e-06	0.374795	0.977	0.915	0.0457644	3	Sipa1l2
Nid1	3.06051e-06	0.423107	1	0.979	0.0461403	3	Nid1
Lpp	3.09197e-06	0.435162	1	0.848	0.0466146	3	Lpp
6820431F20Rik	3.22347e-06	0.403978	1	0.985	0.048597	3	6820431F20Rik
Tinagl1	3.23717e-06	0.490482	0.953	0.883	0.0488036	3	Tinagl1
2410002F23Rik	3.23919e-06	0.341551	1	0.948	0.048834	3	2410002F23Rik
Fam110b	3.30858e-06	0.388554	0.628	0.329	0.0498801	3	Fam110b
Lasp1	3.41528e-06	0.318765	1	0.944	0.0514887	3	Lasp1
Il13ra1	3.508e-06	0.388849	0.977	0.778	0.0528866	3	Il13ra1
Me1	3.72148e-06	0.393311	0.907	0.879	0.0561051	3	Me1
Gper1	3.93191e-06	0.30404	0.326	0.102	0.0592775	3	Gper1
S100a10	4.016e-06	0.294689	1	0.998	0.0605452	3	S100a10
Pde9a	4.14905e-06	0.382767	0.651	0.346	0.0625511	3	Pde9a
Chd3	4.16927e-06	0.295864	1	0.968	0.0628558	3	Chd3
Pla2g4a	4.47956e-06	0.316198	0.512	0.217	0.0675339	3	Pla2g4a
Fas	4.49753e-06	0.256405	0.372	0.124	0.0678047	3	Fas
Nrgn	4.67037e-06	0.438585	0.605	0.317	0.0704105	3	Nrgn
Wscd2	4.71171e-06	0.464294	0.791	0.498	0.0710338	3	Wscd2
Grk6	4.76058e-06	0.303563	1	0.906	0.0717705	3	Grk6
Kctd10	4.8302e-06	0.339006	0.977	0.979	0.07282	3	Kctd10
Il17b	4.84015e-06	0.359408	0.349	0.115	0.0729702	3	Il17b
Eva1c	4.90274e-06	0.269432	0.442	0.17	0.0739138	3	Eva1c
Apba1	4.96803e-06	0.258189	0.465	0.182	0.074898	3	Apba1
Tgfb1i1	5.04298e-06	0.315975	1	0.995	0.076028	3	Tgfb1i1
Itgb1	5.085e-06	0.281947	1	1	0.0766614	3	Itgb1
Rai14	5.3859e-06	0.398522	0.884	0.75	0.0811979	3	Rai14
Sec13	5.49367e-06	0.344386	1	0.997	0.0828225	3	Sec13
Rcbtb1	5.63967e-06	0.339682	0.86	0.642	0.0850236	3	Rcbtb1
Gas2	5.80966e-06	0.371031	0.488	0.219	0.0875864	3	Gas2
Bmf	5.88535e-06	0.389518	0.86	0.601	0.0887275	3	Bmf
Neo1	6.4899e-06	0.352004	1	0.962	0.0978417	3	Neo1
Rusc2	6.56828e-06	0.512231	0.791	0.625	0.0990234	3	Rusc2
Rhobtb3	6.74192e-06	0.411671	0.907	0.818	0.101641	3	Rhobtb3
Arf4	7.05076e-06	0.371804	1	0.994	0.106297	3	Arf4
AI414108	7.15305e-06	0.389356	0.674	0.352	0.107839	3	AI414108
Itga11	7.33849e-06	0.286508	0.349	0.118	0.110635	3	Itga11
Serpinb9	7.40483e-06	0.388332	0.651	0.354	0.111635	3	Serpinb9
Arhgef17	7.42815e-06	0.345012	0.953	0.944	0.111987	3	Arhgef17
Tcf7l1	7.46943e-06	0.383453	0.907	0.81	0.112609	3	Tcf7l1
Lrrc42	7.47994e-06	0.27451	1	0.947	0.112768	3	Lrrc42
Myl12a	7.48597e-06	0.324078	1	1	0.112858	3	Myl12a
Tmed3	7.51656e-06	0.378016	1	0.965	0.11332	3	Tmed3
Gucy1a31	7.52926e-06	0.50473	1	0.894	0.113511	3	Gucy1a3
Rian	7.86484e-06	0.292968	1	0.885	0.11857	3	Rian
Stk38l	8.11855e-06	0.397177	0.93	0.825	0.122395	3	Stk38l
Nfatc4	8.13546e-06	0.30316	0.93	0.701	0.12265	3	Nfatc4
Pld2	8.34512e-06	0.422692	0.86	0.653	0.125811	3	Pld2
Zfp956	8.62834e-06	0.278776	0.395	0.144	0.130081	3	Zfp956
Zc2hc1a	8.8225e-06	0.422568	0.791	0.621	0.133008	3	Zc2hc1a
Col6a2	8.85474e-06	0.381491	1	0.992	0.133494	3	Col6a2
Itpripl2	9.13293e-06	0.344295	0.977	0.821	0.137688	3	Itpripl2
Abcc5	9.2296e-06	0.374954	0.977	0.944	0.139145	3	Abcc5
Irak2	9.45442e-06	0.293407	0.581	0.278	0.142535	3	Irak2
Morf4l2	9.99617e-06	0.252497	1	1	0.150702	3	Morf4l2
Edn1	9.99648e-06	0.569666	0.535	0.269	0.150707	3	Edn1
Arl8a	1.139e-05	0.415651	0.93	0.774	0.171715	3	Arl8a
Mdk	1.18461e-05	0.306492	1	1	0.178592	3	Mdk
Copg1	1.20286e-05	0.359093	1	0.997	0.181344	3	Copg1
Bace1	1.26936e-05	0.405119	0.86	0.621	0.191369	3	Bace1
Smarca2	1.30506e-05	0.368749	0.977	0.892	0.19675	3	Smarca2
Mtus2	1.31793e-05	0.354772	1	0.995	0.198692	3	Mtus2
Glt8d2	1.43247e-05	0.31512	0.419	0.167	0.215959	3	Glt8d2
Fzd2	1.47225e-05	0.328883	1	0.992	0.221956	3	Fzd2
Tmem110	1.48619e-05	0.416205	0.884	0.642	0.224058	3	Tmem110
Cdo1	1.48929e-05	0.276925	0.907	0.662	0.224525	3	Cdo1
Arpc2	1.50079e-05	0.337431	1	1	0.226259	3	Arpc2
Tmem263	1.51428e-05	0.440865	1	0.903	0.228293	3	Tmem263
Glipr2	1.52602e-05	0.358909	1	0.942	0.230063	3	Glipr2
Col6a1	1.57381e-05	0.471409	1	0.983	0.237267	3	Col6a1
Cnnm2	1.59897e-05	0.307447	0.558	0.255	0.241061	3	Cnnm2
Gclc	1.61476e-05	0.501762	0.767	0.517	0.243441	3	Gclc
Pkia	1.64753e-05	0.363907	0.953	0.895	0.248381	3	Pkia
Pofut2	1.65225e-05	0.360923	1	0.998	0.249093	3	Pofut2
Trip6	1.7064e-05	0.356672	0.977	0.947	0.257257	3	Trip6
Fkbp9	1.84141e-05	0.333765	1	0.995	0.277611	3	Fkbp9
Myl12b	1.85586e-05	0.407675	1	0.979	0.279789	3	Myl12b
Map4k4	1.94366e-05	0.33496	1	0.992	0.293027	3	Map4k4
Lgi2	1.94606e-05	0.336128	0.535	0.249	0.293388	3	Lgi2
Il33	1.97839e-05	0.301775	0.558	0.256	0.298262	3	Il33
Fkbp11	1.99599e-05	0.422122	0.837	0.657	0.300915	3	Fkbp11
Frmd6	2.00978e-05	0.37406	1	0.812	0.302994	3	Frmd6
Hey1	2.02528e-05	0.471507	0.814	0.651	0.305332	3	Hey1
Smoc1	2.07133e-05	0.430733	0.791	0.527	0.312274	3	Smoc1
Fmnl3	2.07746e-05	0.372929	0.953	0.841	0.313198	3	Fmnl3
Ext2	2.17186e-05	0.362935	0.977	0.93	0.327429	3	Ext2
Ikbip	2.20752e-05	0.397802	0.953	0.883	0.332806	3	Ikbip
Plod2	2.21095e-05	0.498259	0.884	0.766	0.333322	3	Plod2
Tns3	2.21488e-05	0.395502	1	0.947	0.333915	3	Tns3
Ctdsp2	2.22509e-05	0.289424	1	0.998	0.335455	3	Ctdsp2
Id2	2.37399e-05	0.310748	0.977	0.961	0.357903	3	Id2
Stmn2	2.45739e-05	0.427801	0.651	0.363	0.370477	3	Stmn2
Gli2	2.62186e-05	0.329587	0.651	0.358	0.395272	3	Gli2
Rac3	2.6284e-05	0.351178	0.744	0.443	0.396257	3	Rac3
Col12a1	2.64967e-05	0.425557	0.953	0.722	0.399465	3	Col12a1
Mageh1	2.65444e-05	0.464326	0.93	0.829	0.400184	3	Mageh1
Pdlim2	2.6692e-05	0.278518	0.814	0.476	0.402408	3	Pdlim2
Mex3b	2.67868e-05	0.549076	0.837	0.687	0.403838	3	Mex3b
Nckap5l	2.7005e-05	0.39824	0.907	0.745	0.407128	3	Nckap5l
Smad7	2.78976e-05	0.37411	0.907	0.713	0.420584	3	Smad7
Itga10	2.80495e-05	0.253773	0.372	0.141	0.422874	3	Itga10
Csk	2.81828e-05	0.301976	0.977	0.98	0.424884	3	Csk
Large	2.90742e-05	0.403893	0.86	0.772	0.438323	3	Large
Spcs3	2.90976e-05	0.3985	0.977	0.941	0.438676	3	Spcs3
Sh3d21	2.91517e-05	0.273145	0.605	0.305	0.439491	3	Sh3d21
Dock6	2.93151e-05	0.283313	1	0.953	0.441954	3	Dock6
Hspa13	2.96678e-05	0.316862	0.977	0.783	0.447272	3	Hspa13
Atoh8	3.01314e-05	0.37503	0.767	0.558	0.454261	3	Atoh8
Eri3	3.04122e-05	0.294524	1	0.991	0.458495	3	Eri3
3110039I08Rik	3.07964e-05	0.362958	0.93	0.869	0.464287	3	3110039I08Rik
Elovl1	3.10539e-05	0.454939	0.907	0.951	0.468169	3	Elovl1
Pkd2	3.11252e-05	0.332836	1	0.888	0.469244	3	Pkd2
Oat	3.17714e-05	0.300483	1	1	0.478986	3	Oat
Lamb2	3.28034e-05	0.289726	1	0.994	0.494544	3	Lamb2
Slc39a6	3.56374e-05	0.33268	0.884	0.81	0.537269	3	Slc39a6
Sidt2	3.68154e-05	0.370544	0.977	0.942	0.555029	3	Sidt2
Myo9b	3.74591e-05	0.438705	0.93	0.927	0.564734	3	Myo9b
Npdc1	3.84573e-05	0.347863	0.953	0.785	0.579782	3	Npdc1
Slc12a4	3.94635e-05	0.262514	0.977	0.968	0.594951	3	Slc12a4
Mylk	3.96552e-05	0.4486	0.837	0.669	0.597842	3	Mylk
Fbxo17	4.01659e-05	0.328425	0.605	0.328	0.605541	3	Fbxo17
Man1a2	4.01713e-05	0.370243	0.977	0.904	0.605623	3	Man1a2
Cdh11	4.08323e-05	0.404554	1	0.904	0.615588	3	Cdh11
Mbnl1	4.13702e-05	0.332775	1	0.91	0.623697	3	Mbnl1
Hip1	4.1419e-05	0.309371	1	0.897	0.624432	3	Hip1
Adgrb2	4.18961e-05	0.449219	0.837	0.718	0.631626	3	Adgrb2
Jam3	4.2037e-05	0.34087	0.93	0.801	0.633749	3	Jam3
Cyp51	4.21435e-05	0.365121	0.953	0.868	0.635355	3	Cyp51
Izumo4	4.23454e-05	0.330754	0.791	0.472	0.6384	3	Izumo4
Ppp1r9b	4.27088e-05	0.327022	0.977	0.944	0.643878	3	Ppp1r9b
Copa	4.39354e-05	0.266436	1	0.994	0.66237	3	Copa
Srsf5	4.46271e-05	0.272788	1	1	0.672798	3	Srsf5
Sncaip	4.5831e-05	0.344576	0.744	0.469	0.690948	3	Sncaip
Numbl	4.59371e-05	0.357466	0.814	0.596	0.692548	3	Numbl
Eif4a2	4.59974e-05	0.336271	1	0.997	0.693456	3	Eif4a2
Nid2	4.61414e-05	0.359459	1	0.994	0.695628	3	Nid2
Myh9	4.6649e-05	0.376034	1	0.97	0.70328	3	Myh9
Lum	4.69673e-05	0.501874	1	0.914	0.708079	3	Lum
Vim	4.80138e-05	0.283809	1	1	0.723856	3	Vim
Traf5	4.8186e-05	0.3219	0.674	0.411	0.726453	3	Traf5
Meis2	4.91395e-05	0.389818	0.977	0.912	0.740828	3	Meis2
Slc25a17	5.03279e-05	0.3624	0.884	0.78	0.758743	3	Slc25a17
Smarcd2	5.12214e-05	0.306142	0.93	0.772	0.772213	3	Smarcd2
Hoxb3	5.34452e-05	0.312779	0.558	0.276	0.805739	3	Hoxb3
Fam193b	5.62566e-05	0.301647	0.977	0.917	0.848124	3	Fam193b
Nacc2	5.63324e-05	0.355587	0.651	0.417	0.849268	3	Nacc2
Tnik	5.7691e-05	0.272788	0.651	0.363	0.86975	3	Tnik
Flrt3	5.79619e-05	0.410009	0.698	0.517	0.873834	3	Flrt3
Soga1	6.10718e-05	0.333915	0.93	0.857	0.920718	3	Soga1
Spire1	6.17787e-05	0.268867	0.605	0.317	0.931375	3	Spire1
Nus1	6.20287e-05	0.3725	0.93	0.892	0.935144	3	Nus1
St3gal2	6.52206e-05	0.342173	0.93	0.742	0.983266	3	St3gal2
Nek6	6.52739e-05	0.344066	0.953	0.906	0.984069	3	Nek6
Crispld2	6.56262e-05	0.254831	0.581	0.29	0.989381	3	Crispld2
Pigyl	6.89826e-05	0.268227	0.953	0.873	1	3	Pigyl
App	6.98606e-05	0.289502	1	0.998	1	3	App
Tns1	7.04865e-05	0.258655	1	0.995	1	3	Tns1
Spryd3	7.06478e-05	0.372626	0.791	0.619	1	3	Spryd3
Tead3	7.13739e-05	0.355891	0.93	0.844	1	3	Tead3
Cic	7.20913e-05	0.262213	1	0.994	1	3	Cic
Cars	7.27763e-05	0.330282	0.837	0.693	1	3	Cars
Daam1	7.49319e-05	0.360088	0.977	0.98	1	3	Daam1
Sema5b	7.6037e-05	0.305986	0.465	0.222	1	3	Sema5b
Stk10	7.64881e-05	0.347362	0.674	0.445	1	3	Stk10
Srp72	7.74883e-05	0.319059	0.93	0.917	1	3	Srp72
Fgf18	7.89836e-05	0.354051	0.488	0.244	1	3	Fgf18
Cdc42bpa	7.93583e-05	0.311062	0.977	0.815	1	3	Cdc42bpa
Prkacb	7.94222e-05	0.281645	0.953	0.944	1	3	Prkacb
Rcan2	8.14076e-05	0.391611	0.977	0.923	1	3	Rcan2
Gja4	8.43414e-05	0.599438	0.86	0.781	1	3	Gja4
Fzd7	8.60664e-05	0.379913	0.674	0.395	1	3	Fzd7
Nrbp2	8.62447e-05	0.334139	0.884	0.715	1	3	Nrbp2
Itgb4	8.7813e-05	0.26717	0.419	0.185	1	3	Itgb4
Notch1	8.82973e-05	0.348009	0.977	0.907	1	3	Notch1
Rab2b	9.47434e-05	0.384974	0.791	0.578	1	3	Rab2b
Myo5a	9.57956e-05	0.323007	0.837	0.643	1	3	Myo5a
Man1b1	9.71219e-05	0.298929	1	0.923	1	3	Man1b1
Ctsl	9.76905e-05	0.292823	1	1	1	3	Ctsl
Dctn6	0.000104115	0.290363	0.977	0.973	1	3	Dctn6
Emc8	0.000104404	0.317637	1	0.95	1	3	Emc8
Ctnnb1	0.000107287	0.25946	1	1	1	3	Ctnnb1
Tubb4a	0.000109295	0.330559	0.558	0.308	1	3	Tubb4a
Arfip2	0.000110327	0.304103	0.977	0.912	1	3	Arfip2
Ctf1	0.000118233	0.331628	0.488	0.249	1	3	Ctf1
Snhg3	0.000119194	0.264061	0.953	0.967	1	3	Snhg3
Elmod2	0.000121803	0.3015	0.791	0.555	1	3	Elmod2
Wfikkn2	0.000121932	0.286626	0.512	0.25	1	3	Wfikkn2
Gusb	0.000124545	0.392492	0.953	0.86	1	3	Gusb
Arxes2	0.000125843	0.324551	1	0.838	1	3	Arxes2
Npr1	0.000126659	0.347377	0.86	0.646	1	3	Npr1
AI837181	0.000130615	0.291432	0.977	0.898	1	3	AI837181
Fkbp14	0.000134961	0.406425	0.884	0.804	1	3	Fkbp14
Zfp771	0.000135422	0.291795	0.977	0.917	1	3	Zfp771
Calm2	0.000135583	0.276455	1	1	1	3	Calm2
Arfgap3	0.000136505	0.341916	0.837	0.757	1	3	Arfgap3
Rab13	0.000141602	0.279997	1	0.835	1	3	Rab13
Unc50	0.000146717	0.342787	0.953	0.854	1	3	Unc50
Epha7	0.00014805	0.418039	0.884	0.728	1	3	Epha7
Igf2	0.000151646	0.279087	1	1	1	3	Igf2
D16Ertd472e	0.000152013	0.256914	0.535	0.266	1	3	D16Ertd472e
Creld2	0.00015246	0.250587	0.953	0.98	1	3	Creld2
C1qtnf2	0.000158188	0.272788	0.395	0.173	1	3	C1qtnf2
Asah1	0.000162625	0.331211	1	0.898	1	3	Asah1
Dnajc25	0.000164227	0.268855	0.651	0.393	1	3	Dnajc25
Bin1	0.000166257	0.293162	0.86	0.733	1	3	Bin1
Hoxb4	0.000171936	0.426938	0.488	0.264	1	3	Hoxb4
Lrrc58	0.000172838	0.264014	0.977	0.968	1	3	Lrrc58
2900097C17Rik	0.000177587	0.280005	1	0.998	1	3	2900097C17Rik
Stk40	0.000178371	0.361556	0.907	0.841	1	3	Stk40
Tyro3	0.00018066	0.343823	0.744	0.537	1	3	Tyro3
Acvr1	0.000181335	0.380768	0.86	0.809	1	3	Acvr1
Plxna1	0.000183015	0.324624	0.884	0.879	1	3	Plxna1
Rras	0.0001836	0.280883	0.977	0.992	1	3	Rras
Sec11a	0.000184022	0.259903	1	0.994	1	3	Sec11a
Enpp1	0.00018599	0.339852	0.721	0.463	1	3	Enpp1
Ndrg1	0.000191397	0.277698	0.744	0.566	1	3	Ndrg1
Sema3f	0.000191478	0.442245	0.814	0.657	1	3	Sema3f
Nsg1	0.000196898	0.297751	0.86	0.592	1	3	Nsg1
Tmem55a	0.000197201	0.298525	1	0.936	1	3	Tmem55a
Dkk2	0.000200033	0.300725	0.488	0.237	1	3	Dkk2
Gpr108	0.000212039	0.33682	0.953	0.806	1	3	Gpr108
Dtx3	0.000215703	0.313786	0.977	0.979	1	3	Dtx3
Sec16a	0.000219269	0.274633	1	0.91	1	3	Sec16a
Scd1	0.000221	0.322347	0.465	0.247	1	3	Scd1
Map2	0.000228648	0.310326	0.442	0.217	1	3	Map2
Rin3	0.000240914	0.328577	0.814	0.621	1	3	Rin3
Atrnl1	0.000249438	0.285334	0.93	0.771	1	3	Atrnl1
Xist	0.000251459	0.253114	0.953	0.976	1	3	Xist
Mib2	0.000254829	0.365761	0.884	0.716	1	3	Mib2
Evc	0.000257904	0.294117	0.605	0.358	1	3	Evc
Zfpm1	0.000259367	0.361619	0.977	0.915	1	3	Zfpm1
Pdia3	0.000260956	0.268459	1	1	1	3	Pdia3
Ssr1	0.000263955	0.274176	1	0.994	1	3	Ssr1
Loxl3	0.000265569	0.301775	0.674	0.469	1	3	Loxl3
Fam118a	0.000265711	0.378148	0.721	0.51	1	3	Fam118a
Pnp	0.000266558	0.409966	0.907	0.874	1	3	Pnp
Zdhhc20	0.000277564	0.332817	0.837	0.733	1	3	Zdhhc20
Gmppb	0.00027758	0.305599	0.814	0.695	1	3	Gmppb
Tmem39a	0.000277808	0.342351	0.86	0.813	1	3	Tmem39a
Tcf3	0.00028655	0.250943	1	0.988	1	3	Tcf3
Ext1	0.000289876	0.342142	0.93	0.889	1	3	Ext1
Ttl	0.000290349	0.352934	0.791	0.651	1	3	Ttl
Sec23a	0.000294383	0.27998	0.977	0.962	1	3	Sec23a
Rab4b	0.000297405	0.26946	0.93	0.862	1	3	Rab4b
Dvl2	0.000307557	0.314186	0.953	0.791	1	3	Dvl2
Ptn	0.000313947	0.281817	0.558	0.308	1	3	Ptn
Cacna1g	0.000314017	0.342072	0.86	0.719	1	3	Cacna1g
Slc50a1	0.000317981	0.384686	0.953	0.839	1	3	Slc50a1
Prkcd	0.00031941	0.352191	0.907	0.871	1	3	Prkcd
Cables1	0.000326808	0.483557	0.605	0.404	1	3	Cables1
Serping1	0.000336106	0.262026	0.953	0.731	1	3	Serping1
Ccm2	0.000336222	0.257555	1	0.871	1	3	Ccm2
Cacfd1	0.000342398	0.274493	0.977	0.917	1	3	Cacfd1
Slc38a4	0.000343744	0.276143	1	0.994	1	3	Slc38a4
Gucy1b3	0.000350628	0.340282	0.907	0.859	1	3	Gucy1b3
Plxdc2	0.0003523	0.3447	0.814	0.66	1	3	Plxdc2
Arl16	0.000356504	0.312923	0.837	0.684	1	3	Arl16
Kcnmb1	0.000358627	0.308242	0.419	0.206	1	3	Kcnmb1
Twist2	0.000371062	0.304796	0.721	0.46	1	3	Twist2
Saraf	0.000372691	0.257072	1	0.997	1	3	Saraf
Fgfrl1	0.000377961	0.290463	0.86	0.869	1	3	Fgfrl1
Ap3s1	0.000379085	0.290899	0.977	0.915	1	3	Ap3s1
Slc6a9	0.000405044	0.343057	0.628	0.396	1	3	Slc6a9
Zfp354c	0.000409926	0.353511	0.86	0.677	1	3	Zfp354c
Sh3rf1	0.000410338	0.369071	0.581	0.363	1	3	Sh3rf1
Crabp2	0.000412335	0.327203	0.465	0.237	1	3	Crabp2
Fut11	0.000413075	0.302695	0.651	0.449	1	3	Fut11
Irf6	0.000418818	0.310638	0.558	0.334	1	3	Irf6
Rhob	0.00041954	0.282596	1	0.982	1	3	Rhob
Vhl	0.000430076	0.307188	0.86	0.785	1	3	Vhl
Zfp9	0.000443879	0.272788	0.698	0.464	1	3	Zfp9
Tmem43	0.000464172	0.274031	0.86	0.803	1	3	Tmem43
Tnc	0.000476394	0.713416	0.907	0.839	1	3	Tnc
Fdft1	0.00047762	0.282113	1	0.901	1	3	Fdft1
Meis1	0.000500146	0.285935	1	0.91	1	3	Meis1
Dancr	0.000500847	0.271202	0.953	0.806	1	3	Dancr
Shc2	0.000504927	0.263309	0.442	0.223	1	3	Shc2
Cbfa2t3	0.000509684	0.384861	0.698	0.531	1	3	Cbfa2t3
Dact3	0.000532938	0.278099	1	0.98	1	3	Dact3
Sfswap	0.000535205	0.264804	0.977	0.947	1	3	Sfswap
Sema5a	0.00054654	0.295162	0.86	0.759	1	3	Sema5a
Ssbp2	0.000547325	0.316426	0.93	0.953	1	3	Ssbp2
Kcnip3	0.000547395	0.267606	0.349	0.158	1	3	Kcnip3
Glt8d1	0.000552419	0.274179	0.953	0.921	1	3	Glt8d1
Gna14	0.000591807	0.291597	0.326	0.134	1	3	Gna14
P2ry6	0.000602186	0.259216	0.395	0.193	1	3	P2ry6
Slc38a2	0.000608644	0.25729	1	0.998	1	3	Slc38a2
Rarg	0.000614229	0.26287	0.791	0.56	1	3	Rarg
Marf1	0.00061698	0.270328	0.93	0.856	1	3	Marf1
Fbln1	0.000617364	0.394422	0.907	0.847	1	3	Fbln1
Pear1	0.000648815	0.277842	0.977	0.76	1	3	Pear1
Gpr180	0.00066578	0.254686	0.907	0.812	1	3	Gpr180
Aqp1	0.000672498	0.276736	0.907	0.78	1	3	Aqp1
Pias3	0.000686675	0.281478	0.907	0.848	1	3	Pias3
Rgs3	0.000694869	0.298848	1	0.973	1	3	Rgs3
Peak1	0.000705871	0.282357	0.884	0.742	1	3	Peak1
Ppp1r12c	0.00070832	0.254854	0.977	0.976	1	3	Ppp1r12c
Polr1a	0.000712154	0.300473	0.93	0.762	1	3	Polr1a
Tspan6	0.000714304	0.260552	1	0.958	1	3	Tspan6
Pds5b	0.000753458	0.270458	0.977	0.894	1	3	Pds5b
Ubtd2	0.000771565	0.340815	0.86	0.763	1	3	Ubtd2
Pcdh7	0.000774203	0.375422	0.814	0.725	1	3	Pcdh7
Cnksr3	0.000813816	0.327047	0.698	0.473	1	3	Cnksr3
Crlf2	0.00085519	0.258751	0.698	0.483	1	3	Crlf2
Glis2	0.000889587	0.272268	0.977	0.914	1	3	Glis2
Slc7a6	0.000891877	0.259069	0.977	0.786	1	3	Slc7a6
2900076A07Rik	0.00089497	0.261788	0.674	0.475	1	3	2900076A07Rik
Samd14	0.000919494	0.325123	0.884	0.821	1	3	Samd14
Lats1	0.000952409	0.319308	0.814	0.64	1	3	Lats1
Cdc42ep3	0.000970203	0.313232	0.86	0.678	1	3	Cdc42ep3
Esyt1	0.00097755	0.306197	0.93	0.859	1	3	Esyt1
Slc9a6	0.00104017	0.358061	0.721	0.561	1	3	Slc9a6
Egfr	0.00104421	0.364485	0.488	0.297	1	3	Egfr
Fam131a	0.00104945	0.258222	0.488	0.267	1	3	Fam131a
Tle1	0.00107824	0.282054	0.884	0.627	1	3	Tle1
Smo	0.00109216	0.316474	1	0.924	1	3	Smo
Nsmf	0.00110947	0.278076	0.953	0.897	1	3	Nsmf
Uggt1	0.00113523	0.250886	1	0.939	1	3	Uggt1
Irgm1	0.00114329	0.25841	0.442	0.246	1	3	Irgm1
Hoxa4	0.00116838	0.328761	0.512	0.281	1	3	Hoxa4
Figf	0.00122174	0.40669	0.465	0.256	1	3	Figf
Sepp1	0.00123385	0.325421	1	0.965	1	3	Sepp1
Vmp1	0.00123461	0.283809	0.953	0.945	1	3	Vmp1
Pabpc4l	0.00126512	0.309155	0.512	0.29	1	3	Pabpc4l
Abl1	0.00127476	0.29551	0.977	0.983	1	3	Abl1
Hook3	0.00129533	0.327634	0.86	0.769	1	3	Hook3
Rusc1	0.00130693	0.32022	0.674	0.49	1	3	Rusc1
Vimp	0.00132007	0.30851	0.93	0.917	1	3	Vimp
Sun2	0.00132392	0.320669	0.953	0.904	1	3	Sun2
Naglu	0.00134554	0.291418	0.744	0.589	1	3	Naglu
Rnaseh1	0.00134805	0.274521	0.651	0.489	1	3	Rnaseh1
Erp44	0.00141293	0.262554	0.977	0.93	1	3	Erp44
D15Ertd621e	0.00141854	0.291224	0.93	0.851	1	3	D15Ertd621e
Ptpn14	0.00149324	0.282838	0.884	0.848	1	3	Ptpn14
Map3k1	0.00149512	0.360679	0.767	0.642	1	3	Map3k1
Rbms3	0.00151662	0.351464	0.814	0.739	1	3	Rbms3
Med13l	0.00151702	0.368381	0.721	0.637	1	3	Med13l
Gpsm1	0.00152814	0.32372	0.977	0.914	1	3	Gpsm1
Efhd2	0.00159278	0.291859	0.953	0.906	1	3	Efhd2
Fut8	0.00165278	0.325873	0.791	0.648	1	3	Fut8
C1qtnf1	0.00166761	0.283837	0.605	0.411	1	3	C1qtnf1
Rsu1	0.00167198	0.293574	0.93	0.901	1	3	Rsu1
Plcb3	0.00167612	0.30775	0.814	0.775	1	3	Plcb3
Atxn7l3	0.00170859	0.278587	0.977	0.956	1	3	Atxn7l3
Tgfbr2	0.00172553	0.257196	0.977	0.898	1	3	Tgfbr2
Mlxip	0.00173166	0.417329	0.721	0.683	1	3	Mlxip
Tulp3	0.00174567	0.30393	0.767	0.615	1	3	Tulp3
Cytl1	0.00175307	0.415888	0.674	0.533	1	3	Cytl1
Ppapdc1b	0.0017966	0.302511	0.86	0.785	1	3	Ppapdc1b
Mast4	0.001853	0.312957	0.884	0.785	1	3	Mast4
Srsf9	0.00185925	0.271798	0.977	0.841	1	3	Srsf9
Sqle	0.00192026	0.250552	0.977	0.818	1	3	Sqle
Dmpk	0.00192592	0.254926	0.953	0.964	1	3	Dmpk
Megf10	0.00195977	0.252531	0.465	0.259	1	3	Megf10
Trafd1	0.00197785	0.252603	1	0.91	1	3	Trafd1
Ermp1	0.0020117	0.362916	0.744	0.581	1	3	Ermp1
Zfp362	0.0020456	0.273227	0.977	0.865	1	3	Zfp362
Aggf1	0.0020614	0.278984	0.86	0.762	1	3	Aggf1
Atp2b4	0.00208083	0.274217	0.953	0.912	1	3	Atp2b4
Fam84a	0.00214312	0.259043	0.279	0.121	1	3	Fam84a
Rftn2	0.00214742	0.325643	0.674	0.511	1	3	Rftn2
Rock2	0.0021518	0.275091	0.953	0.921	1	3	Rock2
5930403L14Rik	0.00217901	0.360353	0.651	0.569	1	3	5930403L14Rik
Casc4	0.00219206	0.356734	0.767	0.678	1	3	Casc4
Maml1	0.00220462	0.260275	0.814	0.651	1	3	Maml1
Cpt1c	0.00225851	0.327093	0.744	0.598	1	3	Cpt1c
P4ha2	0.00236703	0.276046	0.93	0.895	1	3	P4ha2
Adamtsl5	0.00241332	0.282097	0.744	0.546	1	3	Adamtsl5
Fam53c	0.00245232	0.281543	0.907	0.83	1	3	Fam53c
Tgfbi	0.00252324	0.377026	0.977	0.907	1	3	Tgfbi
Nphp3	0.00256242	0.303028	0.651	0.439	1	3	Nphp3
Tmem194b	0.00262629	0.271573	0.605	0.464	1	3	Tmem194b
Gpr153	0.00269882	0.315085	0.977	0.888	1	3	Gpr153
Tmem55b	0.00270977	0.255521	0.953	0.765	1	3	Tmem55b
Bmyc	0.0027891	0.325084	0.86	0.824	1	3	Bmyc
Cpt1a	0.00282995	0.302626	0.907	0.816	1	3	Cpt1a
Gpcpd1	0.00286647	0.256222	0.837	0.721	1	3	Gpcpd1
Grhl3	0.00295345	0.26305	0.419	0.244	1	3	Grhl3
Dapk3	0.00299631	0.270042	0.977	0.951	1	3	Dapk3
Zfp809	0.00303727	0.276705	0.651	0.451	1	3	Zfp809
Snhg8	0.00312913	0.255251	0.977	0.976	1	3	Snhg8
Znf512b	0.00313101	0.275132	0.93	0.844	1	3	Znf512b
Bcl7c	0.00316703	0.255988	0.977	0.888	1	3	Bcl7c
Pcnx	0.00328865	0.305876	0.977	0.918	1	3	Pcnx
Spsb1	0.00331442	0.315525	0.488	0.294	1	3	Spsb1
Susd2	0.00333222	0.263899	0.628	0.439	1	3	Susd2
Pnisr	0.00344416	0.293505	0.977	0.947	1	3	Pnisr
Tnk2	0.00347442	0.287977	0.93	0.806	1	3	Tnk2
Cobll1	0.003681	0.29961	0.605	0.436	1	3	Cobll1
Cntfr	0.00370203	0.253275	0.581	0.372	1	3	Cntfr
Tnfsf12	0.00375717	0.256593	0.628	0.443	1	3	Tnfsf12
Mmp14	0.00377515	0.299533	0.721	0.561	1	3	Mmp14
Ankib1	0.00380435	0.268499	0.698	0.598	1	3	Ankib1
Specc1l	0.00388301	0.280782	0.93	0.847	1	3	Specc1l
Pygo2	0.0039616	0.254926	0.977	0.901	1	3	Pygo2
Esyt2	0.00406277	0.276027	0.93	0.795	1	3	Esyt2
B3glct	0.00422137	0.292542	0.791	0.7	1	3	B3glct
Gria1	0.00426805	0.256313	0.558	0.364	1	3	Gria1
Acbd3	0.00427994	0.250706	0.884	0.771	1	3	Acbd3
Tbx18	0.00432033	0.27021	0.837	0.709	1	3	Tbx18
Slit2	0.00449722	0.29591	0.93	0.85	1	3	Slit2
Dos	0.0045219	0.281867	0.628	0.463	1	3	Dos
Kcne1l	0.00456462	0.285712	0.581	0.39	1	3	Kcne1l
Tmed4	0.00460341	0.261977	0.907	0.876	1	3	Tmed4
Nfia	0.00463027	0.294521	0.977	0.942	1	3	Nfia
Csad	0.00463793	0.268881	0.907	0.742	1	3	Csad
Chst12	0.00465484	0.319941	0.744	0.586	1	3	Chst12
Rnd3	0.00490669	0.316795	0.837	0.707	1	3	Rnd3
Man2a1	0.0049228	0.281928	0.884	0.742	1	3	Man2a1
Pofut1	0.00496955	0.2696	0.86	0.863	1	3	Pofut1
Tnfaip8	0.00533139	0.28822	0.791	0.627	1	3	Tnfaip8
Syde1	0.00566891	0.285005	0.93	0.868	1	3	Syde1
Ptprb	0.00583913	0.413802	0.674	0.528	1	3	Ptprb
Map3k12	0.00610199	0.257227	0.791	0.719	1	3	Map3k12
Purg	0.00633235	0.250752	0.744	0.587	1	3	Purg
Scai	0.00639314	0.258742	0.674	0.513	1	3	Scai
Basp1	0.00643296	0.422155	0.884	0.765	1	3	Basp1
Abi3bp	0.00670343	0.657764	0.535	0.401	1	3	Abi3bp
Smim15	0.0067149	0.294839	0.744	0.69	1	3	Smim15
Zfp703	0.00713331	0.25063	0.767	0.728	1	3	Zfp703
Aplp1	0.00729078	0.349862	0.814	0.718	1	3	Aplp1
Arcn1	0.00735334	0.272887	1	0.954	1	3	Arcn1
Shc1	0.00746649	0.302125	0.953	0.912	1	3	Shc1
Txndc5	0.00752107	0.283879	1	0.991	1	3	Txndc5
Cept1	0.00757857	0.283232	0.814	0.742	1	3	Cept1
Rcn2	0.00761503	0.259416	0.977	0.964	1	3	Rcn2
Pmm1	0.00803654	0.275942	0.791	0.666	1	3	Pmm1
Ndel1	0.00824433	0.285633	0.93	0.901	1	3	Ndel1
Crim1	0.00863179	0.322841	0.628	0.464	1	3	Crim1
Zfp36	0.00866435	0.274309	0.628	0.466	1	3	Zfp36
Scpep1	0.00876009	0.270369	0.791	0.833	1	3	Scpep1
Gamt	0.00883088	0.251997	0.977	0.907	1	3	Gamt
Tcta	0.0088678	0.289069	0.814	0.718	1	3	Tcta
Hes1	0.00919291	0.25902	0.93	0.821	1	3	Hes1
Kcnj15	1.59188e-22	0.831733	0.615	0.103	2.39992e-18	4	Kcnj15
Nt5e	3.63539e-19	0.940956	0.821	0.262	5.48072e-15	4	Nt5e
Dlg21	1.74409e-17	0.927329	0.846	0.312	2.6294e-13	4	Dlg2
Pdlim31	1.49045e-16	1.20048	1	0.98	2.247e-12	4	Pdlim3
Hmgcs21	2.39863e-16	0.832059	0.949	0.431	3.61618e-12	4	Hmgcs2
Lum1	2.51415e-16	1.06222	1	0.914	3.79033e-12	4	Lum
Grina	3.85357e-16	0.62094	1	0.988	5.80965e-12	4	Grina
Ltbp21	4.30711e-16	1.20102	0.923	0.439	6.4934e-12	4	Ltbp2
Shisa2	3.05869e-15	0.976728	0.872	0.391	4.61127e-11	4	Shisa2
Bgn1	3.42852e-15	0.740364	1	1	5.16884e-11	4	Bgn
Dkk31	4.49421e-15	1.06127	1	0.941	6.77548e-11	4	Dkk3
Tagln21	1.03459e-14	0.504515	1	0.998	1.55974e-10	4	Tagln2
Ltbp31	2.09624e-14	0.76214	1	0.991	3.1603e-10	4	Ltbp3
Postn	2.97509e-14	0.742185	1	0.997	4.48524e-10	4	Postn
Col18a1	1.13221e-13	0.602139	1	1	1.70691e-09	4	Col18a1
Tgfbi1	4.6473e-13	1.32985	0.974	0.908	7.00627e-09	4	Tgfbi
Meox1	5.52569e-13	1.21487	0.821	0.492	8.33054e-09	4	Meox1
Angptl21	9.32917e-13	0.596208	1	0.976	1.40647e-08	4	Angptl2
Scx	2.03968e-12	1.07191	0.846	0.475	3.07502e-08	4	Scx
Mmp21	2.04482e-12	0.6023	1	0.995	3.08277e-08	4	Mmp2
Baalc	2.76833e-12	0.364836	0.41	0.075	4.17354e-08	4	Baalc
Col9a3	3.32516e-12	0.749317	0.897	0.523	5.01301e-08	4	Col9a3
Fbn21	3.34888e-12	0.637227	1	0.998	5.04878e-08	4	Fbn2
Mstn	3.3957e-12	0.536199	0.385	0.071	5.11936e-08	4	Mstn
Bmp2	3.92019e-12	0.475392	0.692	0.225	5.91008e-08	4	Bmp2
Arhgef401	4.68596e-12	0.592113	1	0.94	7.06455e-08	4	Arhgef40
Fbln51	4.80564e-12	0.660102	1	0.997	7.24499e-08	4	Fbln5
Fbln21	6.63727e-12	0.6438	1	1	1.00064e-07	4	Fbln2
Fxyd6	8.24524e-12	0.644726	1	0.882	1.24305e-07	4	Fxyd6
Papss2	9.90512e-12	1.06881	0.872	0.46	1.4933e-07	4	Papss2
Apoe	1.16334e-11	0.625808	1	1	1.75385e-07	4	Apoe
Eln1	1.18313e-11	0.381271	1	1	1.78369e-07	4	Eln
Col5a21	1.54073e-11	0.560841	1	0.998	2.32281e-07	4	Col5a2
Col9a1	2.54002e-11	0.725103	0.897	0.555	3.82933e-07	4	Col9a1
Enc1	3.3939e-11	0.888691	0.872	0.632	5.11664e-07	4	Enc1
Fmod	4.04865e-11	0.906698	0.949	0.633	6.10374e-07	4	Fmod
Htra11	5.33386e-11	0.624086	1	0.953	8.04132e-07	4	Htra1
Dnm3os1	5.66153e-11	0.868303	0.949	0.689	8.53533e-07	4	Dnm3os
Serinc2	6.84324e-11	0.567119	0.846	0.376	1.03169e-06	4	Serinc2
Tbx20	8.23321e-11	0.66382	1	0.989	1.24124e-06	4	Tbx20
Prelp	8.40121e-11	0.766963	0.718	0.302	1.26657e-06	4	Prelp
Pdgfra	1.01628e-10	0.537858	1	0.762	1.53214e-06	4	Pdgfra
Sox9	1.07706e-10	0.709507	0.872	0.534	1.62377e-06	4	Sox9
Bmp11	1.18628e-10	0.529123	1	0.989	1.78844e-06	4	Bmp1
Ltbp41	1.37289e-10	0.450687	1	1	2.06977e-06	4	Ltbp4
Mfap41	1.66933e-10	0.556645	1	0.977	2.51669e-06	4	Mfap4
Fgfr2	1.92719e-10	0.665102	0.923	0.624	2.90544e-06	4	Fgfr2
Id11	2.45478e-10	0.638443	1	0.959	3.70083e-06	4	Id1
Oprl11	2.4829e-10	0.404625	0.538	0.154	3.74322e-06	4	Oprl1
Sfrp21	2.48441e-10	0.892317	1	0.983	3.7455e-06	4	Sfrp2
Msx1	3.76903e-10	0.482473	0.538	0.161	5.68219e-06	4	Msx1
Id31	5.06728e-10	0.535919	1	0.998	7.63943e-06	4	Id3
Mfap21	6.09792e-10	0.480203	1	0.991	9.19322e-06	4	Mfap2
Ssc5d	6.47803e-10	0.794096	0.795	0.357	9.76628e-06	4	Ssc5d
Fgfrl11	1.14483e-09	0.626702	0.949	0.864	1.72595e-05	4	Fgfrl1
Mgp1	1.15785e-09	0.619581	1	1	1.74558e-05	4	Mgp
Flna1	1.60833e-09	0.374693	1	1	2.42471e-05	4	Flna
Cox4i21	1.65334e-09	0.66875	0.821	0.46	2.49257e-05	4	Cox4i2
Mecom1	1.8294e-09	0.541112	0.897	0.626	2.758e-05	4	Mecom
Pdgfrl1	2.00012e-09	0.545796	0.949	0.632	3.01538e-05	4	Pdgfrl
Igsf31	2.07287e-09	0.467702	1	0.955	3.12506e-05	4	Igsf3
3110039I08Rik1	2.09299e-09	0.509816	1	0.866	3.15539e-05	4	3110039I08Rik
Pkd11	2.36918e-09	0.463211	1	0.931	3.57178e-05	4	Pkd1
Tnc1	2.43903e-09	0.71783	0.974	0.836	3.67709e-05	4	Tnc
Smad6	2.80147e-09	0.617404	0.949	0.817	4.2235e-05	4	Smad6
Epha71	2.86405e-09	0.644357	0.923	0.727	4.31783e-05	4	Epha7
Fcgrt	3.9229e-09	0.503511	1	0.824	5.91416e-05	4	Fcgrt
Bmf1	4.13322e-09	0.598921	0.872	0.602	6.23125e-05	4	Bmf
Thbs1	4.2054e-09	0.799403	0.923	0.701	6.34006e-05	4	Thbs1
C430049B03Rik	4.4632e-09	0.40646	1	1	6.72872e-05	4	C430049B03Rik
Zyx1	5.30047e-09	0.371472	1	1	7.99099e-05	4	Zyx
Nrep1	5.33163e-09	0.399356	1	1	8.03797e-05	4	Nrep
Syt111	5.64737e-09	0.600549	0.897	0.609	8.51397e-05	4	Syt11
Nnat	6.38201e-09	0.527239	1	0.876	9.62152e-05	4	Nnat
6330403K07Rik1	6.44304e-09	0.471098	1	0.821	9.71353e-05	4	6330403K07Rik
Tanc21	6.7575e-09	0.545537	1	0.863	0.000101876	4	Tanc2
Glipr11	7.83617e-09	0.330854	0.641	0.222	0.000118138	4	Glipr1
Adamts101	8.10688e-09	0.515722	1	0.919	0.000122219	4	Adamts10
Shroom1	8.24365e-09	0.439278	0.436	0.122	0.000124281	4	Shroom1
Cyp26b1	9.11836e-09	0.671882	0.615	0.258	0.000137468	4	Cyp26b1
Zfpm11	9.99324e-09	0.469857	1	0.914	0.000150658	4	Zfpm1
Sidt21	1.65134e-08	0.436037	0.974	0.943	0.000248955	4	Sidt2
Id21	1.75959e-08	0.547263	1	0.959	0.000265275	4	Id2
EYFP1	1.79422e-08	0.651667	0.795	0.425	0.000270496	4	EYFP
Ptx3	1.79968e-08	0.534123	0.564	0.208	0.00027132	4	Ptx3
Fbn11	1.94538e-08	0.396413	1	0.988	0.000293286	4	Fbn1
Lmna1	2.15831e-08	0.462498	1	0.989	0.000325387	4	Lmna
Tgfb31	2.17109e-08	0.60909	0.974	0.713	0.000327313	4	Tgfb3
Lrrc75b1	2.32878e-08	0.492187	0.436	0.133	0.000351087	4	Lrrc75b
Gabarap1	2.73395e-08	0.254252	1	1	0.00041217	4	Gabarap
1010001N08Rik	3.75875e-08	0.348307	0.564	0.196	0.000566669	4	1010001N08Rik
Csrp21	4.54295e-08	0.359267	1	1	0.000684895	4	Csrp2
Kctd121	4.89625e-08	0.514142	1	0.943	0.000738159	4	Kctd12
Mrc21	5.34407e-08	0.478539	1	0.799	0.000805672	4	Mrc2
Ccnl2	5.47953e-08	0.345121	1	0.997	0.000826094	4	Ccnl2
Lef1	6.69057e-08	0.290093	0.333	0.08	0.00100867	4	Lef1
Tceal3	6.91831e-08	0.443205	0.615	0.24	0.001043	4	Tceal3
Gramd1a	6.99667e-08	0.479504	1	0.973	0.00105482	4	Gramd1a
Rcn31	7.23094e-08	0.350074	1	1	0.00109014	4	Rcn3
P3h31	8.47071e-08	0.418339	1	0.932	0.00127704	4	P3h3
Clmp1	8.99339e-08	0.308082	0.564	0.198	0.00135584	4	Clmp
Aspn	1.17907e-07	0.721196	0.795	0.46	0.00177757	4	Aspn
Ecm1	1.19891e-07	0.401373	1	0.884	0.00180748	4	Ecm1
Ptgis1	1.32754e-07	0.502324	0.923	0.747	0.00200139	4	Ptgis
Ypel3	1.42203e-07	0.367877	1	0.956	0.00214385	4	Ypel3
Col9a2	1.45129e-07	0.34331	0.949	0.73	0.00218797	4	Col9a2
Synpo1	1.46598e-07	0.407496	1	0.869	0.00221011	4	Synpo
Pde1a1	1.48371e-07	0.492601	0.872	0.551	0.00223684	4	Pde1a
Antxr11	1.48389e-07	0.421254	1	0.777	0.00223711	4	Antxr1
Qpct1	1.73613e-07	0.402273	0.744	0.374	0.00261739	4	Qpct
Robo2	2.03362e-07	0.465709	0.564	0.232	0.00306589	4	Robo2
Loxl11	2.24196e-07	0.262722	1	0.98	0.00337997	4	Loxl1
Rasl11b1	2.72608e-07	0.547271	0.974	0.95	0.00410983	4	Rasl11b
Cthrc11	2.73865e-07	0.765831	0.821	0.591	0.00412878	4	Cthrc1
Pxdn1	2.94541e-07	0.351646	1	1	0.00444051	4	Pxdn
Wnk4	3.20125e-07	0.602153	0.718	0.404	0.00482621	4	Wnk4
Emp31	3.81365e-07	0.350546	1	0.917	0.00574947	4	Emp3
Rhou	4.12424e-07	0.635044	0.949	0.845	0.00621771	4	Rhou
Timp3	4.59727e-07	0.363598	0.974	0.959	0.00693085	4	Timp3
Agrn1	4.7525e-07	0.328736	1	1	0.00716487	4	Agrn
Gpc2	4.97052e-07	0.495261	0.821	0.569	0.00749355	4	Gpc2
Egr1	5.5635e-07	0.46852	0.769	0.398	0.00838753	4	Egr1
Adamts21	6.06466e-07	0.476561	0.949	0.742	0.00914307	4	Adamts2
Cd341	6.60618e-07	0.376478	1	0.985	0.00995948	4	Cd34
Clip31	7.92328e-07	0.486489	0.949	0.759	0.0119451	4	Clip3
Man2a2	7.99104e-07	0.338515	0.974	0.977	0.0120473	4	Man2a2
Chsy1	8.39767e-07	0.503191	1	0.953	0.0126603	4	Chsy1
Rspo3	8.6531e-07	0.441681	0.641	0.3	0.0130454	4	Rspo3
Samd141	9.96355e-07	0.417577	0.949	0.817	0.015021	4	Samd14
Nfatc41	1.14096e-06	0.475282	0.923	0.703	0.0172011	4	Nfatc4
Efemp21	1.28813e-06	0.338504	1	0.917	0.0194198	4	Efemp2
Vasn1	1.47414e-06	0.473387	0.923	0.81	0.0222241	4	Vasn
Col16a11	1.90932e-06	0.304081	1	0.929	0.0287849	4	Col16a1
Hand2	1.93156e-06	0.374638	1	0.989	0.0291201	4	Hand2
Sh3pxd2a1	2.20866e-06	0.372884	1	0.985	0.0332978	4	Sh3pxd2a
Col5a11	2.29387e-06	0.260009	1	0.998	0.0345824	4	Col5a1
H1f01	2.362e-06	0.283062	1	1	0.0356095	4	H1f0
Abi3bp1	2.47454e-06	0.843087	0.641	0.395	0.0373061	4	Abi3bp
Plod1	2.4905e-06	0.343782	0.974	0.971	0.0375468	4	Plod1
Hapln1	2.54058e-06	0.705832	0.59	0.305	0.0383019	4	Hapln1
2700081O15Rik	2.78829e-06	0.29407	1	0.98	0.0420362	4	2700081O15Rik
Lrp11	2.85629e-06	0.346846	1	0.929	0.0430614	4	Lrp1
Sfxn3	3.31671e-06	0.34527	0.923	0.745	0.0500026	4	Sfxn3
Col3a11	4.4059e-06	0.292064	1	1	0.0664234	4	Col3a1
Ptprs1	4.4712e-06	0.253138	1	0.998	0.0674078	4	Ptprs
Pmp221	4.56277e-06	0.2975	1	0.934	0.0687884	4	Pmp22
Dact31	5.04056e-06	0.411137	1	0.98	0.0759915	4	Dact3
Dchs11	5.1778e-06	0.351421	0.974	0.923	0.0780605	4	Dchs1
Rrbp11	5.22479e-06	0.269098	1	1	0.0787689	4	Rrbp1
Tmem178	5.24025e-06	0.490001	0.513	0.24	0.0790021	4	Tmem178
Dpt1	5.63978e-06	0.648478	0.821	0.579	0.0850253	4	Dpt
Pisd-ps11	6.58731e-06	0.322346	1	0.97	0.0993103	4	Pisd-ps1
Pmepa11	6.78775e-06	0.386292	0.974	0.946	0.102332	4	Pmepa1
Mmp231	7.28272e-06	0.434111	1	0.937	0.109794	4	Mmp23
Il11ra11	7.73154e-06	0.316799	1	0.956	0.116561	4	Il11ra1
Ramp2	7.78908e-06	0.369097	1	0.997	0.117428	4	Ramp2
Mxra81	8.30951e-06	0.41627	0.974	0.845	0.125274	4	Mxra8
Kank11	8.79241e-06	0.395257	1	0.911	0.132554	4	Kank1
Chmp2b1	9.04359e-06	0.632461	0.949	0.903	0.136341	4	Chmp2b
Vash1	9.41238e-06	0.40801	0.974	0.943	0.141901	4	Vash1
Slc12a21	1.14515e-05	0.49932	1	0.947	0.172643	4	Slc12a2
Fat4	1.18024e-05	0.472809	0.821	0.517	0.177932	4	Fat4
Dact11	1.3943e-05	0.437652	0.949	0.71	0.210205	4	Dact1
Ppp1r9b1	1.42511e-05	0.309758	0.974	0.944	0.21485	4	Ppp1r9b
Kcnmb4	1.47799e-05	0.439074	0.692	0.419	0.222822	4	Kcnmb4
Fibin	1.57662e-05	0.357876	0.846	0.549	0.237692	4	Fibin
Rtn1	1.62352e-05	0.395083	0.667	0.373	0.244762	4	Rtn1
Bambi1	1.62491e-05	0.481838	1	0.968	0.244972	4	Bambi
Dclk11	1.66607e-05	0.394144	0.692	0.37	0.251176	4	Dclk1
Olfml1	1.67283e-05	0.270634	0.487	0.201	0.252196	4	Olfml1
Itga81	1.8114e-05	0.461861	0.718	0.511	0.273087	4	Itga8
Lgals71	1.85059e-05	0.366999	0.615	0.318	0.278994	4	Lgals7
Trp53inp1	2.08354e-05	0.380952	0.744	0.465	0.314114	4	Trp53inp1
Scarf21	2.31084e-05	0.295345	1	0.893	0.348382	4	Scarf2
Numa1	2.37389e-05	0.338047	1	0.973	0.357887	4	Numa1
Ski1	2.37942e-05	0.280633	1	0.992	0.358721	4	Ski
Furin	2.39568e-05	0.266312	1	0.988	0.361173	4	Furin
Sertad41	2.42087e-05	0.481265	0.872	0.689	0.364971	4	Sertad4
Aqp11	2.50343e-05	0.638011	0.846	0.784	0.377417	4	Aqp1
Rassf2	2.6317e-05	0.314569	0.718	0.385	0.396755	4	Rassf2
Angptl7	2.96208e-05	0.306342	0.462	0.186	0.446563	4	Angptl7
Emilin11	3.13241e-05	0.341668	1	0.994	0.472242	4	Emilin1
Fstl31	3.16557e-05	0.374723	0.949	0.804	0.477241	4	Fstl3
Adarb11	3.32273e-05	0.390578	0.923	0.703	0.500935	4	Adarb1
Gata5	3.37069e-05	0.349323	0.667	0.359	0.508165	4	Gata5
Aspscr1	3.41577e-05	0.356237	0.974	0.935	0.514962	4	Aspscr1
Timp21	3.4242e-05	0.283744	1	0.997	0.516232	4	Timp2
Os9	3.67861e-05	0.283462	0.974	0.916	0.554587	4	Os9
Abcc51	3.69855e-05	0.296702	1	0.943	0.557593	4	Abcc5
Aplp11	3.76503e-05	0.361912	0.897	0.713	0.567615	4	Aplp1
Adam191	3.80609e-05	0.304413	1	0.962	0.573806	4	Adam19
Stx5a1	4.00881e-05	0.26683	1	0.968	0.604368	4	Stx5a
Kazald11	4.02418e-05	0.439459	0.564	0.293	0.606686	4	Kazald1
Abca1	4.12769e-05	0.370094	0.872	0.585	0.62229	4	Abca1
Mgea5	4.55692e-05	0.267239	1	0.988	0.687001	4	Mgea5
Clip2	4.60246e-05	0.349942	0.795	0.522	0.693866	4	Clip2
Rhob1	4.61868e-05	0.334558	1	0.982	0.696313	4	Rhob
Tmem150a	4.73905e-05	0.349708	0.872	0.659	0.714459	4	Tmem150a
St6galnac6	5.0138e-05	0.349465	0.923	0.756	0.755881	4	St6galnac6
Scara3	5.16076e-05	0.412255	0.769	0.477	0.778036	4	Scara3
Rai141	5.4193e-05	0.372889	0.923	0.748	0.817014	4	Rai14
Irf61	6.01824e-05	0.352236	0.615	0.332	0.90731	4	Irf6
Sdc31	6.06185e-05	0.403914	1	0.976	0.913884	4	Sdc3
Sost1	6.68792e-05	0.304413	0.718	0.436	1	4	Sost
Cd9	7.21196e-05	0.282987	0.923	0.875	1	4	Cd9
Pth1r1	7.21577e-05	0.361575	0.949	0.884	1	4	Pth1r
P4ha31	7.32363e-05	0.332408	0.897	0.739	1	4	P4ha3
Srpx21	7.38907e-05	0.328822	0.513	0.253	1	4	Srpx2
Limk2	7.46796e-05	0.42028	1	0.941	1	4	Limk2
Dennd2a	7.53847e-05	0.294946	0.974	0.796	1	4	Dennd2a
Ebf41	7.57262e-05	0.331777	0.59	0.317	1	4	Ebf4
2410002F23Rik1	7.59676e-05	0.297407	0.974	0.95	1	4	2410002F23Rik
Fam193b1	7.77833e-05	0.311854	0.949	0.919	1	4	Fam193b
Ctxn1	7.95442e-05	0.311493	0.974	0.911	1	4	Ctxn1
Gata61	9.11221e-05	0.334441	1	0.974	1	4	Gata6
Frzb1	9.75653e-05	0.335807	0.744	0.459	1	4	Frzb
Wbscr171	9.87449e-05	0.324439	0.487	0.219	1	4	Wbscr17
Adgrl11	0.000100577	0.287993	0.974	0.946	1	4	Adgrl1
Art41	0.000100739	0.355911	0.821	0.575	1	4	Art4
Arid5a	0.000103711	0.444734	0.641	0.419	1	4	Arid5a
Bmper	0.000106577	0.372675	0.59	0.3	1	4	Bmper
Pkd21	0.000109429	0.346305	1	0.888	1	4	Pkd2
Dpysl4	0.000113253	0.362293	0.359	0.143	1	4	Dpysl4
Oplah	0.000114131	0.364994	0.872	0.768	1	4	Oplah
Znrf1	0.000115307	0.257335	1	0.941	1	4	Znrf1
Tle2	0.000120487	0.323368	0.872	0.722	1	4	Tle2
Fam110b1	0.000121809	0.340008	0.615	0.332	1	4	Fam110b
Dlg4	0.000122618	0.273272	0.641	0.359	1	4	Dlg4
Igfbp71	0.000123363	0.3274	0.974	0.888	1	4	Igfbp7
Adamts19	0.000126532	0.459291	0.821	0.652	1	4	Adamts19
Foxp4	0.000126983	0.350874	0.974	0.864	1	4	Foxp4
Fzd11	0.000128435	0.308342	1	0.894	1	4	Fzd1
Grik5	0.000128649	0.265207	0.949	0.926	1	4	Grik5
Bmp41	0.000128695	0.650387	0.744	0.584	1	4	Bmp4
Dnm1	0.000132581	0.395125	0.795	0.612	1	4	Dnm1
Prcp	0.000140304	0.363258	0.872	0.763	1	4	Prcp
2010111I01Rik	0.000142631	0.307077	0.974	0.888	1	4	2010111I01Rik
Irf2bp2	0.000149495	0.268826	0.974	0.985	1	4	Irf2bp2
Vcan	0.000155136	0.307564	1	0.985	1	4	Vcan
Mtmr11	0.000165044	0.376835	0.538	0.293	1	4	Mtmr11
Zfp579	0.000173112	0.303217	0.949	0.813	1	4	Zfp579
Dleu2	0.000174485	0.398988	0.564	0.333	1	4	Dleu2
Podxl2	0.000175252	0.268882	1	0.964	1	4	Podxl2
Ltbp11	0.000181122	0.253371	1	0.974	1	4	Ltbp1
Tgfb21	0.000182361	0.403698	0.846	0.655	1	4	Tgfb2
Rarg1	0.000182582	0.306174	0.821	0.56	1	4	Rarg
Fkbp101	0.000185671	0.261062	1	0.989	1	4	Fkbp10
Rcsd11	0.000186819	0.325311	0.974	0.986	1	4	Rcsd1
Ier2	0.000192771	0.264756	1	0.908	1	4	Ier2
Tenm31	0.000200722	0.318944	0.872	0.712	1	4	Tenm3
5033428I22Rik	0.000203015	0.378288	0.538	0.3	1	4	5033428I22Rik
Sema6c1	0.000211964	0.365652	0.795	0.637	1	4	Sema6c
Nxf1	0.00022413	0.257806	1	0.989	1	4	Nxf1
Wsb11	0.000224454	0.337673	1	0.986	1	4	Wsb1
Snai1	0.000235399	0.349184	0.667	0.418	1	4	Snai1
Ifitm1	0.000235647	0.268264	0.513	0.255	1	4	Ifitm1
Unc5b	0.000242571	0.371013	0.974	0.884	1	4	Unc5b
Tagln1	0.000255855	0.260629	1	0.882	1	4	Tagln
Unkl	0.000258614	0.268264	0.59	0.314	1	4	Unkl
Thbs31	0.000268981	0.383457	0.846	0.73	1	4	Thbs3
Rab131	0.000277817	0.286702	0.949	0.839	1	4	Rab13
Twist1	0.000284837	0.328531	0.821	0.599	1	4	Twist1
Myrf1	0.000320553	0.278188	0.897	0.68	1	4	Myrf
Hexb	0.000320752	0.361496	0.897	0.777	1	4	Hexb
Tmem151b	0.000332619	0.274199	0.436	0.21	1	4	Tmem151b
Frmd61	0.000348429	0.307233	0.923	0.817	1	4	Frmd6
Ace1	0.000359975	0.258134	0.487	0.243	1	4	Ace
Cyr611	0.000371263	0.321294	0.821	0.709	1	4	Cyr61
Zfp516	0.000372033	0.280125	0.923	0.771	1	4	Zfp516
Nkain4	0.000390459	0.262953	0.897	0.722	1	4	Nkain4
Mpeg1	0.000399196	0.356012	0.487	0.25	1	4	Mpeg1
Tmem261	0.000409622	0.291954	0.667	0.401	1	4	Tmem26
Tmem86a	0.000417647	0.349101	0.744	0.56	1	4	Tmem86a
Flrt31	0.000419407	0.288467	0.821	0.511	1	4	Flrt3
Tia1	0.000461579	0.252391	1	0.958	1	4	Tia1
Kctd15	0.000461932	0.306106	0.795	0.643	1	4	Kctd15
Eva1b1	0.000463105	0.272628	1	0.941	1	4	Eva1b
Nfatc1	0.000484496	0.32866	0.846	0.686	1	4	Nfatc1
Ociad2	0.000517885	0.353422	0.667	0.48	1	4	Ociad2
Rasa1	0.000531348	0.284049	0.974	0.855	1	4	Rasa1
Stk38l1	0.000534761	0.302497	0.923	0.827	1	4	Stk38l
Cpxm11	0.000545809	0.322658	0.949	0.763	1	4	Cpxm1
Mex3b1	0.000562098	0.287975	0.897	0.685	1	4	Mex3b
Scube11	0.000642408	0.360283	0.769	0.59	1	4	Scube1
Cabin11	0.000714092	0.323975	1	0.913	1	4	Cabin1
Atp2b41	0.000820664	0.285549	0.974	0.911	1	4	Atp2b4
Psd1	0.000858305	0.333132	0.692	0.46	1	4	Psd
Fat1	0.000917637	0.41431	0.974	0.962	1	4	Fat1
Zfp57	0.000930752	0.291473	0.846	0.646	1	4	Zfp57
Serpinf1	0.000950393	0.257669	0.872	0.668	1	4	Serpinf1
Cacna1g1	0.000958687	0.381686	0.821	0.722	1	4	Cacna1g
Casp6	0.00102571	0.263973	0.897	0.837	1	4	Casp6
Slc16a2	0.00106281	0.359661	0.846	0.775	1	4	Slc16a2
Rela	0.00106652	0.307085	1	0.92	1	4	Rela
Nedd91	0.00106983	0.452424	0.744	0.632	1	4	Nedd9
Pik3ip1	0.00110043	0.360637	0.846	0.724	1	4	Pik3ip1
Filip1l1	0.00111866	0.311551	0.872	0.744	1	4	Filip1l
Nkd1	0.00122265	0.373167	0.744	0.578	1	4	Nkd1
Adamts151	0.00125631	0.284398	0.872	0.706	1	4	Adamts15
Mms19	0.0012732	0.316171	0.923	0.789	1	4	Mms19
Fzd21	0.00128243	0.331855	1	0.992	1	4	Fzd2
Plxna3	0.00128741	0.303355	0.872	0.665	1	4	Plxna3
Sbk1	0.00130108	0.2648	0.923	0.789	1	4	Sbk1
Gem1	0.0013108	0.280385	0.59	0.354	1	4	Gem
Plekha6	0.00136563	0.260472	0.821	0.691	1	4	Plekha6
Sft2d2	0.00138989	0.399206	0.897	0.83	1	4	Sft2d2
Gpr1531	0.00143632	0.308907	0.949	0.89	1	4	Gpr153
Grhl1	0.00143656	0.253718	0.41	0.21	1	4	Grhl1
Itpripl21	0.00144622	0.317944	0.949	0.824	1	4	Itpripl2
Lemd2	0.00147102	0.260872	1	0.932	1	4	Lemd2
Mmp111	0.00151369	0.406684	0.846	0.78	1	4	Mmp11
C1qb	0.00151684	0.278729	0.846	0.609	1	4	C1qb
Fbrs	0.00152628	0.254588	0.974	0.869	1	4	Fbrs
Krba1	0.00164365	0.255783	0.923	0.828	1	4	Krba1
Ezh1	0.00166067	0.265553	0.692	0.457	1	4	Ezh1
Heyl1	0.00171879	0.268264	0.846	0.662	1	4	Heyl
Gja41	0.00176944	0.445805	0.872	0.781	1	4	Gja4
Zfp28	0.00196637	0.262785	0.487	0.285	1	4	Zfp28
Chpf1	0.00198868	0.305898	1	0.964	1	4	Chpf
Cep250	0.00200871	0.256057	0.795	0.704	1	4	Cep250
Vgll31	0.00203375	0.268264	0.333	0.154	1	4	Vgll3
Cdc42ep31	0.00228335	0.369986	0.744	0.686	1	4	Cdc42ep3
Prnp	0.00232477	0.316519	1	0.986	1	4	Prnp
Pxdc1	0.00234108	0.263749	0.795	0.597	1	4	Pxdc1
Rtkn	0.00244747	0.260056	0.923	0.777	1	4	Rtkn
Pknox2	0.00249035	0.291494	0.436	0.243	1	4	Pknox2
Stx1a1	0.00258754	0.277319	0.846	0.701	1	4	Stx1a
Tmub2	0.00302246	0.280017	0.949	0.842	1	4	Tmub2
Plekhg31	0.00305238	0.299076	0.897	0.852	1	4	Plekhg3
Cpt1c1	0.0031635	0.275688	0.769	0.597	1	4	Cpt1c
Pdgfrb1	0.0032369	0.280253	0.974	0.885	1	4	Pdgfrb
Ugdh	0.00349581	0.298743	0.897	0.83	1	4	Ugdh
Pnp1	0.0035862	0.273463	0.949	0.872	1	4	Pnp
Fosl2	0.00360474	0.327081	0.718	0.532	1	4	Fosl2
Gpcpd11	0.00367868	0.291224	0.795	0.724	1	4	Gpcpd1
Slc39a10	0.00368397	0.251143	0.872	0.84	1	4	Slc39a10
Rasl11a1	0.00385494	0.384272	0.564	0.383	1	4	Rasl11a
Egln3	0.00408679	0.327917	0.641	0.451	1	4	Egln3
Myo1b	0.00413692	0.279314	0.923	0.811	1	4	Myo1b
Mxi1	0.00483523	0.317677	0.846	0.765	1	4	Mxi1
Fbln11	0.00501686	0.290602	0.897	0.848	1	4	Fbln1
Slc50a11	0.00533317	0.281085	0.897	0.843	1	4	Slc50a1
Phyhd1	0.00540551	0.261295	0.667	0.474	1	4	Phyhd1
Cacna1d	0.00553755	0.371993	0.538	0.398	1	4	Cacna1d
Slc38a51	0.00560797	0.252474	0.641	0.422	1	4	Slc38a5
Mex3d	0.00662355	0.257335	0.821	0.677	1	4	Mex3d
Chst21	0.00692638	0.356537	0.795	0.587	1	4	Chst2
Specc11	0.00704315	0.305247	0.744	0.635	1	4	Specc1
Rab11fip5	0.00731202	0.256832	0.974	0.979	1	4	Rab11fip5
Trf	0.00735613	0.280438	0.641	0.466	1	4	Trf
F2r1	0.00743401	0.282009	0.974	0.991	1	4	F2r
Kdsr	0.00872514	0.315517	0.641	0.505	1	4	Kdsr
Uts2b	2.48044e-34	1.01213	0.897	0.152	3.73951e-30	5	Uts2b
Myh6	3.74004e-22	1.46984	1	1	5.63849e-18	5	Myh6
Myl7	5.30116e-22	1.40152	1	1	7.99203e-18	5	Myl7
Tmem163	2.57119e-21	1.11464	0.949	0.367	3.87632e-17	5	Tmem163
Myl1	9.08714e-21	1.33445	1	0.839	1.36998e-16	5	Myl1
Mybphl	8.15837e-20	1.05595	0.923	0.382	1.22996e-15	5	Mybphl
Sln	1.80012e-19	1.08547	1	0.727	2.71386e-15	5	Sln
Fgf12	2.7928e-18	0.965171	0.821	0.256	4.21042e-14	5	Fgf12
Angpt1	4.56793e-17	0.961914	1	0.682	6.88661e-13	5	Angpt1
Stard10	1.18134e-15	0.860955	0.974	0.769	1.78098e-11	5	Stard10
Pcp4l1	5.14647e-15	0.860137	0.949	0.712	7.75882e-11	5	Pcp4l1
Myl91	2.25526e-14	0.515094	1	1	3.40003e-10	5	Myl9
Nr2f1	2.672e-14	0.889346	0.923	0.529	4.0283e-10	5	Nr2f1
Atp2a2	4.87648e-14	0.57927	1	1	7.35178e-10	5	Atp2a2
Slc17a7	1.2806e-13	0.500323	0.538	0.121	1.93063e-09	5	Slc17a7
Nppa	1.96016e-13	0.866785	1	1	2.95514e-09	5	Nppa
Igfbp2	2.58215e-13	0.685317	1	0.917	3.89284e-09	5	Igfbp2
D830030K20Rik	3.67196e-12	0.452906	0.538	0.131	5.53585e-08	5	D830030K20Rik
Gpx3	7.66895e-12	0.542886	1	1	1.15617e-07	5	Gpx3
Itm2c	2.50968e-11	0.494455	1	0.997	3.7836e-07	5	Itm2c
Kcnj3	6.36083e-11	0.672546	0.769	0.344	9.58959e-07	5	Kcnj3
Myl4	7.72974e-11	0.617009	1	1	1.16534e-06	5	Myl4
Ank1	9.30746e-11	0.554672	0.923	0.683	1.40319e-06	5	Ank1
Gja5	1.03542e-10	0.646272	1	0.81	1.561e-06	5	Gja5
Itga6	1.77503e-10	0.518604	1	0.946	2.67603e-06	5	Itga6
Reep5	3.86295e-10	0.412923	1	1	5.82379e-06	5	Reep5
Ryr3	4.59857e-10	0.452955	0.615	0.213	6.9328e-06	5	Ryr3
Slit31	7.49146e-09	0.502136	0.949	0.615	0.000112941	5	Slit3
Igfbp6	9.67457e-09	0.373186	0.641	0.246	0.000145854	5	Igfbp6
Dkk32	1.66666e-08	0.44232	1	0.941	0.000251266	5	Dkk3
Plvap	2.36638e-08	0.505335	1	0.932	0.000356756	5	Plvap
Pla2g7	4.91893e-08	0.389217	0.641	0.256	0.000741577	5	Pla2g7
Slc39a8	1.55109e-07	0.503547	0.744	0.391	0.00233843	5	Slc39a8
Pgam2	2.87418e-07	0.384611	1	1	0.00433311	5	Pgam2
Abcc8	3.13303e-07	0.532448	0.744	0.425	0.00472335	5	Abcc8
Cox6a2	4.00137e-07	0.421842	1	1	0.00603246	5	Cox6a2
Nudt4	7.49632e-07	0.360658	1	0.995	0.0113014	5	Nudt4
Adam11	7.54963e-07	0.468189	0.872	0.697	0.0113818	5	Adam11
Ccdc3	8.08421e-07	0.54234	0.821	0.615	0.0121878	5	Ccdc3
Upk3b	1.17782e-06	0.265703	0.744	0.335	0.0177567	5	Upk3b
Tmem176a	1.39183e-06	0.419978	0.974	0.911	0.0209833	5	Tmem176a
Mgst1	1.61447e-06	0.353559	0.949	0.772	0.0243397	5	Mgst1
Mndal	1.75482e-06	0.327069	0.462	0.166	0.0264556	5	Mndal
Fras1	1.75776e-06	0.475229	0.974	0.83	0.0265	5	Fras1
Igfbpl1	1.89747e-06	0.435318	0.872	0.609	0.0286063	5	Igfbpl1
Epha4	2.30616e-06	0.515361	0.744	0.469	0.0347677	5	Epha4
Emilin2	2.65449e-06	0.36474	1	0.949	0.0400191	5	Emilin2
Mest	4.17209e-06	0.329937	1	1	0.0628984	5	Mest
Wisp11	6.10667e-06	0.330069	0.897	0.783	0.0920642	5	Wisp1
Kcnj5	6.22894e-06	0.41636	0.795	0.499	0.0939075	5	Kcnj5
Tbx5	8.43631e-06	0.492771	0.821	0.523	0.127186	5	Tbx5
Gpr182	1.65704e-05	0.417735	0.821	0.563	0.249816	5	Gpr182
Pam	1.76719e-05	0.345533	1	1	0.266421	5	Pam
Corin	2.2243e-05	0.383952	0.923	0.741	0.335336	5	Corin
Slc2a1	2.37173e-05	0.300208	1	0.995	0.357562	5	Slc2a1
Bex4	2.59555e-05	0.326549	1	0.995	0.391305	5	Bex4
Hs6st21	2.63926e-05	0.398529	0.821	0.621	0.397895	5	Hs6st2
Tmem38a	3.30883e-05	0.339823	1	0.967	0.498839	5	Tmem38a
Trabd	4.46397e-05	0.348307	0.949	0.917	0.672988	5	Trabd
Aldh1b1	5.96252e-05	0.332658	1	0.976	0.898909	5	Aldh1b1
Gsg1l	9.06155e-05	0.352482	0.821	0.593	1	5	Gsg1l
Ap1s3	0.000100693	0.336834	0.385	0.158	1	5	Ap1s3
Entpd5	0.000179445	0.333222	0.897	0.774	1	5	Entpd5
Enpep	0.000179763	0.362575	0.718	0.49	1	5	Enpep
Npr3	0.000190547	0.361024	0.949	0.801	1	5	Npr3
Trim54	0.000200238	0.353279	0.59	0.339	1	5	Trim54
Myom2	0.000297688	0.320632	0.667	0.44	1	5	Myom2
Panx2	0.000448964	0.308566	0.513	0.284	1	5	Panx2
Kcnj8	0.000478975	0.299376	0.769	0.6	1	5	Kcnj8
Upk1b	0.000535556	0.331777	0.59	0.347	1	5	Upk1b
Arhgap1	0.000647141	0.287326	1	0.988	1	5	Arhgap1
Nrtn	0.00072424	0.345179	0.846	0.674	1	5	Nrtn
Adgrg6	0.000816163	0.337218	0.821	0.671	1	5	Adgrg6
Adcy1	0.000952408	0.279764	0.538	0.303	1	5	Adcy1
Grb14	0.000983698	0.281025	0.974	0.795	1	5	Grb14
Plekha7	0.00102639	0.277926	0.923	0.771	1	5	Plekha7
Fign	0.00143754	0.25856	0.538	0.299	1	5	Fign
Sort1	0.00146909	0.255424	0.974	0.95	1	5	Sort1
Mdga1	0.00151347	0.285234	0.769	0.544	1	5	Mdga1
Lyl1	0.00177337	0.261003	0.769	0.535	1	5	Lyl1
Camk1d	0.0025716	0.308082	0.385	0.199	1	5	Camk1d
Aif1l	0.00277741	0.375013	0.949	0.899	1	5	Aif1l
Arl5a	0.00323193	0.275115	1	0.982	1	5	Arl5a
Ctsc	0.00366632	0.259023	0.821	0.668	1	5	Ctsc
Gng2	0.00369985	0.250074	0.974	0.891	1	5	Gng2
Mt3	0.00371999	0.252143	1	0.935	1	5	Mt3
Msln1	0.00588974	0.359296	0.667	0.557	1	5	Msln
Slc7a7	0.00731087	0.305582	0.538	0.401	1	5	Slc7a7
Apoc1	0.00774512	0.374282	0.538	0.379	1	5	Apoc1
Col23a1	0.00807765	0.275617	0.795	0.713	1	5	Col23a1
Colec12	0.00942987	0.273379	0.846	0.799	1	5	Colec12
Actc1	1.64102e-20	0.640159	1	1	2.474e-16	6	Actc1
Tnni1	3.32402e-20	0.672853	1	1	5.01129e-16	6	Tnni1
Gapdh	3.72026e-20	0.561095	1	1	5.60866e-16	6	Gapdh
Cox6c	4.92903e-20	0.646597	1	1	7.43101e-16	6	Cox6c
Myl31	6.05458e-20	0.791223	1	1	9.12789e-16	6	Myl3
Myh71	7.92862e-20	0.814022	1	1	1.19532e-15	6	Myh7
Irx1	1.76233e-19	0.795295	1	0.328	2.65689e-15	6	Irx1
Ckm1	2.76626e-19	0.750269	1	1	4.17041e-15	6	Ckm
Fhl21	5.7072e-19	0.792448	1	0.997	8.60417e-15	6	Fhl2
Fabp3	5.94486e-19	0.669625	1	1	8.96247e-15	6	Fabp3
Tnnt2	6.44358e-19	0.682603	1	1	9.71434e-15	6	Tnnt2
Aldoa	7.5483e-19	0.56045	1	1	1.13798e-14	6	Aldoa
Actn21	1.11893e-18	0.661648	1	1	1.68691e-14	6	Actn2
Tpm1	1.15248e-18	0.555175	1	1	1.73749e-14	6	Tpm1
Atp5a1	1.15884e-18	0.526214	1	1	1.74706e-14	6	Atp5a1
Atp5k	1.16716e-18	0.587359	1	1	1.75961e-14	6	Atp5k
Usmg5	1.43392e-18	0.562495	1	1	2.16177e-14	6	Usmg5
Tnnc1	1.52688e-18	0.59516	1	1	2.30193e-14	6	Tnnc1
Cycs1	3.52462e-18	0.601196	1	1	5.31372e-14	6	Cycs
Pkm	4.55664e-18	0.474327	1	1	6.86959e-14	6	Pkm
2010107E04Rik	6.17185e-18	0.572311	1	1	9.30467e-14	6	2010107E04Rik
Tpi1	6.82434e-18	0.528184	1	1	1.02884e-13	6	Tpi1
Fam162a	7.85366e-18	0.639531	1	1	1.18402e-13	6	Fam162a
Uqcrfs1	8.59613e-18	0.613467	1	1	1.29595e-13	6	Uqcrfs1
Tnni3	9.08247e-18	0.60831	1	1	1.36927e-13	6	Tnni3
Cox5b	1.21568e-17	0.51301	1	1	1.83276e-13	6	Cox5b
Myh7b1	1.33372e-17	0.812172	1	0.949	2.01072e-13	6	Myh7b
Bves1	1.52043e-17	0.734886	1	0.994	2.2922e-13	6	Bves
Cyc1	1.67821e-17	0.55217	1	1	2.53007e-13	6	Cyc1
Mrpl12	1.7177e-17	0.583925	1	1	2.58961e-13	6	Mrpl12
Ndufs6	1.91336e-17	0.523619	1	1	2.88458e-13	6	Ndufs6
Cox5a	1.92424e-17	0.564796	1	1	2.90098e-13	6	Cox5a
Atp5b	2.25685e-17	0.596072	1	1	3.40243e-13	6	Atp5b
Uqcr11	2.34418e-17	0.577821	1	1	3.53408e-13	6	Uqcr11
Slc25a4	2.88289e-17	0.550472	1	1	4.34625e-13	6	Slc25a4
Hopx	3.19749e-17	0.816068	1	0.984	4.82053e-13	6	Hopx
Ldha	3.95715e-17	0.563985	1	1	5.96581e-13	6	Ldha
Pgm2	4.24108e-17	0.653639	1	0.997	6.39385e-13	6	Pgm2
Acadl	5.0464e-17	0.679152	1	1	7.60795e-13	6	Acadl
Ivns1abp	5.3006e-17	0.544354	1	1	7.99119e-13	6	Ivns1abp
Mybpc3	6.10722e-17	0.625503	1	1	9.20725e-13	6	Mybpc3
Minos1	6.82241e-17	0.457774	1	1	1.02855e-12	6	Minos1
Flnc	6.84075e-17	0.568543	1	1	1.03131e-12	6	Flnc
Pdk1	6.95424e-17	0.677607	1	0.987	1.04842e-12	6	Pdk1
Sh3bgr	7.6536e-17	0.671754	1	1	1.15386e-12	6	Sh3bgr
Pfkp	8.3591e-17	0.708487	1	0.997	1.26022e-12	6	Pfkp
Atp5j2	8.44881e-17	0.478406	1	1	1.27374e-12	6	Atp5j2
Sorbs2	8.78332e-17	0.738992	1	1	1.32417e-12	6	Sorbs2
Tcap	1.0735e-16	0.796352	1	0.987	1.61841e-12	6	Tcap
Uqcr10	1.16724e-16	0.539648	1	1	1.75973e-12	6	Uqcr10
Ldhb	1.44077e-16	0.616259	1	1	2.17211e-12	6	Ldhb
Vegfb	1.67793e-16	0.530425	1	0.999	2.52965e-12	6	Vegfb
Rcan1	1.80417e-16	0.697793	1	0.979	2.71996e-12	6	Rcan1
Myl21	1.83948e-16	0.772143	1	1	2.7732e-12	6	Myl2
Idh2	1.99145e-16	0.615086	1	1	3.00232e-12	6	Idh2
Cox7a2	2.32832e-16	0.530657	1	1	3.51017e-12	6	Cox7a2
Smpx	2.43815e-16	0.690639	1	1	3.67575e-12	6	Smpx
Crat	2.71688e-16	0.584087	1	0.999	4.09597e-12	6	Crat
Sdha	2.9175e-16	0.527127	1	1	4.39843e-12	6	Sdha
Bex11	3.4805e-16	0.641802	1	1	5.2472e-12	6	Bex1
Pdhb	4.12514e-16	0.595709	1	1	6.21907e-12	6	Pdhb
Crip2	5.46783e-16	0.603178	1	1	8.24329e-12	6	Crip2
Slc2a11	5.5995e-16	0.682067	1	0.996	8.4418e-12	6	Slc2a1
Pgam1	6.6195e-16	0.43928	1	1	9.97956e-12	6	Pgam1
Fam134b	8.176e-16	0.843487	1	0.792	1.23261e-11	6	Fam134b
Irx41	9.60688e-16	0.796043	1	0.834	1.44833e-11	6	Irx4
Cox8a	9.87185e-16	0.502799	1	1	1.48828e-11	6	Cox8a
Pgk11	1.07139e-15	0.555989	1	1	1.61522e-11	6	Pgk1
Cox7c	1.10835e-15	0.550142	1	1	1.67095e-11	6	Cox7c
Hspb1	1.34685e-15	0.489872	1	1	2.03051e-11	6	Hspb1
Pln	1.64787e-15	0.7842	1	1	2.48433e-11	6	Pln
Ndufa12	1.66197e-15	0.461332	1	1	2.50558e-11	6	Ndufa12
Cox4i1	1.92889e-15	0.429882	1	1	2.90799e-11	6	Cox4i1
Ndufa5	2.09074e-15	0.463953	1	1	3.15201e-11	6	Ndufa5
Gbas	2.14558e-15	0.634638	1	0.999	3.23467e-11	6	Gbas
Chchd10	2.19114e-15	0.568373	1	1	3.30336e-11	6	Chchd10
Cox17	2.35537e-15	0.569378	1	1	3.55096e-11	6	Cox17
Nrap	2.65923e-15	0.76928	1	0.931	4.00905e-11	6	Nrap
Atp1a1	2.8245e-15	0.49744	1	1	4.25822e-11	6	Atp1a1
Pfkl	2.90038e-15	0.570882	1	0.997	4.37261e-11	6	Pfkl
Gpi1	2.93073e-15	0.429349	1	1	4.41836e-11	6	Gpi1
Eci1	2.9349e-15	0.661105	1	0.978	4.42466e-11	6	Eci1
Suclg1	3.26889e-15	0.536376	1	0.999	4.92817e-11	6	Suclg1
D630045M09Rik	3.37326e-15	0.539854	0.886	0.288	5.08553e-11	6	D630045M09Rik
Nexn	3.47587e-15	0.608151	1	0.997	5.24022e-11	6	Nexn
Dlst	4.02575e-15	0.506581	1	1	6.06922e-11	6	Dlst
Slc16a31	4.28432e-15	0.681241	1	0.982	6.45904e-11	6	Slc16a3
Lbh1	4.5431e-15	0.57738	1	1	6.84918e-11	6	Lbh
Adprhl1	4.6908e-15	0.661692	1	0.981	7.07184e-11	6	Adprhl1
Hspa9	4.73146e-15	0.521989	1	1	7.13315e-11	6	Hspa9
Snap91	4.80044e-15	0.70037	1	0.97	7.23714e-11	6	Snap91
Mif1	5.01793e-15	0.472146	1	1	7.56503e-11	6	Mif
Csrp3	5.1047e-15	0.588243	1	1	7.69585e-11	6	Csrp3
Bnip31	6.32899e-15	0.744142	1	0.985	9.54158e-11	6	Bnip3
Cox7a1	6.667e-15	0.652381	1	0.999	1.00512e-10	6	Cox7a1
Atp5l	7.27651e-15	0.456641	1	1	1.09701e-10	6	Atp5l
Uqcrq	7.68271e-15	0.492567	1	1	1.15824e-10	6	Uqcrq
Lmod3	8.1961e-15	0.804978	1	0.672	1.23564e-10	6	Lmod3
Lyz1	8.33823e-15	0.534116	0.686	0.166	1.25707e-10	6	Lyz1
Higd1a	9.06461e-15	0.524294	1	1	1.36658e-10	6	Higd1a
Idh3a	9.37159e-15	0.609666	1	0.993	1.41286e-10	6	Idh3a
Ndufb5	1.03583e-14	0.473597	1	1	1.56162e-10	6	Ndufb5
Sucla2	1.13308e-14	0.561082	1	0.993	1.70823e-10	6	Sucla2
Myoz2	1.13552e-14	0.735698	1	0.934	1.7119e-10	6	Myoz2
Myom1	1.18778e-14	0.57478	1	1	1.7907e-10	6	Myom1
Ndufv1	1.28939e-14	0.501796	1	1	1.94389e-10	6	Ndufv1
Asb2	1.33254e-14	0.645503	1	0.994	2.00894e-10	6	Asb2
Sdhb	1.4205e-14	0.496732	1	1	2.14155e-10	6	Sdhb
Lclat1	1.51469e-14	0.710212	1	0.909	2.28354e-10	6	Lclat1
Acot13	1.51794e-14	0.602639	1	0.996	2.28845e-10	6	Acot13
Uqcrc1	1.55336e-14	0.478656	1	1	2.34185e-10	6	Uqcrc1
Obscn	1.78341e-14	0.651492	1	0.987	2.68867e-10	6	Obscn
Ttn	1.93052e-14	0.626263	1	1	2.91045e-10	6	Ttn
Lrrfip1	1.93253e-14	0.553483	1	0.999	2.91348e-10	6	Lrrfip1
Hcfc1r1	1.98202e-14	0.52931	1	1	2.98809e-10	6	Hcfc1r1
Uqcrb	2.35193e-14	0.461553	1	1	3.54577e-10	6	Uqcrb
Ndufs7	2.39079e-14	0.45843	1	1	3.60436e-10	6	Ndufs7
Gys1	2.68302e-14	0.610757	1	0.981	4.04491e-10	6	Gys1
Fam96b	2.94956e-14	0.541809	1	1	4.44676e-10	6	Fam96b
Tfrc	3.05514e-14	0.750217	1	0.819	4.60594e-10	6	Tfrc
Got1	3.1402e-14	0.630881	1	0.988	4.73416e-10	6	Got1
Kcne3	3.94438e-14	0.689944	0.743	0.241	5.94654e-10	6	Kcne3
Ndufa1	3.99816e-14	0.593089	1	1	6.02763e-10	6	Ndufa1
Fh1	4.33689e-14	0.552799	1	0.999	6.5383e-10	6	Fh1
Mdh2	4.95036e-14	0.48365	1	1	7.46317e-10	6	Mdh2
Sh3kbp1	5.35127e-14	0.67609	1	0.957	8.06757e-10	6	Sh3kbp1
Ndufc1	5.44558e-14	0.47273	1	1	8.20975e-10	6	Ndufc1
Uqcrh	5.58876e-14	0.438955	1	1	8.42562e-10	6	Uqcrh
Eif4ebp1	5.93491e-14	0.480802	1	1	8.94748e-10	6	Eif4ebp1
Pde4dip	6.64854e-14	0.592554	1	0.985	1.00233e-09	6	Pde4dip
1110001J03Rik	6.84085e-14	0.535983	1	0.999	1.03133e-09	6	1110001J03Rik
Timm17a	6.97805e-14	0.555132	1	0.988	1.05201e-09	6	Timm17a
Kcne12	7.1182e-14	0.732685	1	0.963	1.07314e-09	6	Kcne1
Nnt	7.38981e-14	0.541366	1	1	1.11409e-09	6	Nnt
Rrad	7.70467e-14	0.548405	1	1	1.16156e-09	6	Rrad
Pnkd	7.82963e-14	0.473785	1	1	1.18039e-09	6	Pnkd
Mrpl42	8.11024e-14	0.465289	1	1	1.2227e-09	6	Mrpl42
Ppif1	8.96999e-14	0.613004	1	0.982	1.35232e-09	6	Ppif
Atp5g31	1.00121e-13	0.542817	1	1	1.50942e-09	6	Atp5g3
Bola3	1.00534e-13	0.504191	1	0.997	1.51565e-09	6	Bola3
Ntn1	1.0814e-13	0.800319	1	0.838	1.63032e-09	6	Ntn1
C1qbp	1.14971e-13	0.482576	1	1	1.7333e-09	6	C1qbp
Ghitm	1.19791e-13	0.510611	1	0.999	1.80597e-09	6	Ghitm
Sod2	1.22884e-13	0.527482	1	1	1.8526e-09	6	Sod2
Alpk2	1.36417e-13	0.663892	1	0.874	2.05663e-09	6	Alpk2
Uqcrc2	1.44612e-13	0.498375	1	1	2.18018e-09	6	Uqcrc2
Mdh1	1.5103e-13	0.542068	1	1	2.27692e-09	6	Mdh1
Vegfa	1.61473e-13	0.614574	1	0.951	2.43437e-09	6	Vegfa
Slc25a51	1.64266e-13	0.450381	1	1	2.47647e-09	6	Slc25a5
Ndufv3	1.69463e-13	0.449829	1	1	2.55483e-09	6	Ndufv3
Myo18b	1.88938e-13	0.610143	1	0.975	2.84842e-09	6	Myo18b
Rbm20	1.90361e-13	0.653536	1	0.9	2.86988e-09	6	Rbm20
Atp2a21	2.04626e-13	0.486959	1	1	3.08494e-09	6	Atp2a2
Aco2	2.07559e-13	0.56867	1	1	3.12916e-09	6	Aco2
Ndufc2	2.17646e-13	0.438827	1	1	3.28122e-09	6	Ndufc2
Atp5d	2.33593e-13	0.359617	1	1	3.52166e-09	6	Atp5d
Cox6a1	2.56081e-13	0.397356	1	1	3.86068e-09	6	Cox6a1
Idh3g	2.91241e-13	0.497654	1	0.999	4.39075e-09	6	Idh3g
Ndufs2	3.20457e-13	0.434511	1	1	4.83121e-09	6	Ndufs2
Mt1	3.21484e-13	0.604172	1	0.999	4.84669e-09	6	Mt1
Acsl1	3.22743e-13	0.652327	1	0.816	4.86567e-09	6	Acsl1
Ndufb2	3.38878e-13	0.44846	1	1	5.10892e-09	6	Ndufb2
Tufm	3.97095e-13	0.471969	1	1	5.9866e-09	6	Tufm
Ppia	4.10518e-13	0.293394	1	1	6.18897e-09	6	Ppia
Banf1	4.31508e-13	0.413864	1	1	6.50541e-09	6	Banf1
Immt	4.34169e-13	0.501076	1	1	6.54553e-09	6	Immt
Cox6b1	4.78645e-13	0.440476	1	1	7.21604e-09	6	Cox6b1
Slc8a1	4.78717e-13	0.590898	1	1	7.21714e-09	6	Slc8a1
Hspd1	4.96469e-13	0.45097	1	1	7.48476e-09	6	Hspd1
Pdlim5	5.11397e-13	0.524341	1	0.996	7.70983e-09	6	Pdlim5
Mfn2	5.15291e-13	0.551396	1	0.993	7.76853e-09	6	Mfn2
Ndufb9	5.78455e-13	0.434798	1	1	8.72079e-09	6	Ndufb9
Clasp1	6.19848e-13	0.578052	1	0.981	9.34484e-09	6	Clasp1
Doc2g	6.51451e-13	0.6034	1	0.963	9.82128e-09	6	Doc2g
Vdac2	6.73887e-13	0.433988	1	1	1.01595e-08	6	Vdac2
Slc25a11	6.90042e-13	0.440616	1	1	1.04031e-08	6	Slc25a11
Aldh5a1	6.90508e-13	0.61829	1	0.813	1.04101e-08	6	Aldh5a1
Ryr2	6.97031e-13	0.685469	1	0.931	1.05084e-08	6	Ryr2
Ndrg4	7.12703e-13	0.615226	1	0.969	1.07447e-08	6	Ndrg4
Acat1	7.32963e-13	0.537725	1	0.997	1.10502e-08	6	Acat1
Ndufa4	7.49501e-13	0.448591	1	1	1.12995e-08	6	Ndufa4
Tubb5	7.57775e-13	0.2682	1	1	1.14242e-08	6	Tubb5
Vldlr	8.48008e-13	0.645929	1	0.895	1.27846e-08	6	Vldlr
Dbi	8.62117e-13	0.376811	1	1	1.29973e-08	6	Dbi
Oxct1	8.63959e-13	0.418115	1	1	1.30251e-08	6	Oxct1
Polr2l	8.67045e-13	0.371618	1	1	1.30716e-08	6	Polr2l
Fam195a	8.7364e-13	0.601567	1	0.934	1.3171e-08	6	Fam195a
Scn5a	8.80638e-13	0.710643	1	0.768	1.32765e-08	6	Scn5a
Atp5f1	9.0857e-13	0.436168	1	1	1.36976e-08	6	Atp5f1
Ndufb8	9.87402e-13	0.417584	1	1	1.48861e-08	6	Ndufb8
Lmo7	9.94268e-13	0.597491	1	0.976	1.49896e-08	6	Lmo7
Anapc13	1.00248e-12	0.436541	1	1	1.51134e-08	6	Anapc13
Nppb	1.01161e-12	0.891578	1	0.811	1.5251e-08	6	Nppb
Rnf207	1.03763e-12	0.628119	1	0.9	1.56433e-08	6	Rnf207
Lpar31	1.05563e-12	0.675421	1	0.72	1.59147e-08	6	Lpar3
Ndufb7	1.06917e-12	0.391056	1	1	1.61188e-08	6	Ndufb7
Kcng2	1.09654e-12	0.613572	1	0.961	1.65315e-08	6	Kcng2
Unc45b	1.15429e-12	0.586274	1	0.993	1.7402e-08	6	Unc45b
Ptgds	1.15608e-12	0.683339	1	0.817	1.74291e-08	6	Ptgds
Ndufa2	1.1652e-12	0.365902	1	1	1.75666e-08	6	Ndufa2
Cox20	1.17334e-12	0.476379	1	0.996	1.76893e-08	6	Cox20
Ndufb6	1.20079e-12	0.438773	1	1	1.81031e-08	6	Ndufb6
Eno3	1.20981e-12	0.54142	1	0.997	1.82391e-08	6	Eno3
Prkaa2	1.30728e-12	0.596221	1	0.897	1.97086e-08	6	Prkaa2
Hadhb	1.35921e-12	0.517847	1	0.997	2.04914e-08	6	Hadhb
Sdhd	1.36977e-12	0.546733	1	0.994	2.06506e-08	6	Sdhd
Mrpl36	1.39959e-12	0.523589	1	0.981	2.11002e-08	6	Mrpl36
Ldb3	1.569e-12	0.577688	1	0.999	2.36542e-08	6	Ldb3
Trim63	1.62176e-12	0.590029	1	0.958	2.44496e-08	6	Trim63
Ndufab1	1.72495e-12	0.476976	1	1	2.60053e-08	6	Ndufab1
Atp5j	1.78182e-12	0.446421	1	1	2.68626e-08	6	Atp5j
Gpc1	1.864e-12	0.557869	1	0.972	2.81017e-08	6	Gpc1
Acads	2.01013e-12	0.544639	1	0.991	3.03047e-08	6	Acads
Hadha	2.03598e-12	0.429565	1	1	3.06945e-08	6	Hadha
Tubb2b	2.04346e-12	0.459322	1	0.997	3.08072e-08	6	Tubb2b
Cs	2.09255e-12	0.477621	1	1	3.15472e-08	6	Cs
Tnfrsf12a	2.11051e-12	0.591001	1	0.985	3.1818e-08	6	Tnfrsf12a
Xirp2	2.26794e-12	0.266135	0.343	0.048	3.41915e-08	6	Xirp2
Eef1a2	2.32606e-12	0.623515	1	0.972	3.50676e-08	6	Eef1a2
Ndufb3	2.42733e-12	0.428747	1	1	3.65944e-08	6	Ndufb3
Suclg2	2.54494e-12	0.542782	1	0.969	3.83674e-08	6	Suclg2
Nop10	2.6539e-12	0.373907	1	1	4.00102e-08	6	Nop10
Slc25a3	2.81211e-12	0.388282	1	1	4.23954e-08	6	Slc25a3
Gyg	3.13346e-12	0.51973	1	1	4.724e-08	6	Gyg
Atp5o	3.25667e-12	0.419703	1	1	4.90975e-08	6	Atp5o
Hspb71	3.3149e-12	0.477925	1	1	4.99754e-08	6	Hspb7
Fibp	3.31719e-12	0.581223	0.971	0.91	5.001e-08	6	Fibp
Myeov2	3.44968e-12	0.3717	1	1	5.20074e-08	6	Myeov2
Cox7b	3.47252e-12	0.473947	1	1	5.23517e-08	6	Cox7b
Idh3b	3.80138e-12	0.455183	1	1	5.73096e-08	6	Idh3b
Dusp27	4.02219e-12	0.569248	1	0.847	6.06385e-08	6	Dusp27
Alpk31	4.06787e-12	0.590225	1	0.94	6.13272e-08	6	Alpk3
Casq1	4.07215e-12	0.651152	1	0.958	6.13917e-08	6	Casq1
Acadm	4.16795e-12	0.514295	1	0.994	6.2836e-08	6	Acadm
Cav3	4.72112e-12	0.518001	1	0.979	7.11756e-08	6	Cav3
Casq2	4.77472e-12	0.605586	1	0.991	7.19837e-08	6	Casq2
Acadvl	5.02107e-12	0.485257	1	0.993	7.56977e-08	6	Acadvl
Ndufb10	5.04004e-12	0.416975	1	1	7.59836e-08	6	Ndufb10
Tmod1	5.22719e-12	0.551636	1	0.996	7.88052e-08	6	Tmod1
Gas6	5.384e-12	0.561077	1	0.981	8.11691e-08	6	Gas6
Ndufs3	5.41255e-12	0.423903	1	1	8.15995e-08	6	Ndufs3
Strip2	5.68929e-12	0.660471	1	0.843	8.57718e-08	6	Strip2
Mapre2	5.77222e-12	0.535062	1	0.976	8.70219e-08	6	Mapre2
Smyd2	5.96135e-12	0.493582	1	0.999	8.98733e-08	6	Smyd2
Josd2	6.82438e-12	0.44767	1	1	1.02884e-07	6	Josd2
Timm10	6.93769e-12	0.477673	1	0.979	1.04593e-07	6	Timm10
Dld	7.11113e-12	0.498152	1	0.988	1.07207e-07	6	Dld
Pfkm	7.68497e-12	0.467939	1	0.993	1.15859e-07	6	Pfkm
Stard7	8.1338e-12	0.48505	1	0.991	1.22625e-07	6	Stard7
Ndufs4	8.24429e-12	0.399265	1	1	1.24291e-07	6	Ndufs4
Srl	8.3893e-12	0.535345	1	0.999	1.26477e-07	6	Srl
Lsm6	8.50419e-12	0.417584	1	1	1.28209e-07	6	Lsm6
Gja1	9.21913e-12	0.606527	1	0.996	1.38988e-07	6	Gja1
Cluh	9.4269e-12	0.534478	1	0.99	1.4212e-07	6	Cluh
Ube2c	9.55696e-12	0.44027	1	1	1.44081e-07	6	Ube2c
Ndufa9	1.04656e-11	0.456238	1	0.999	1.57779e-07	6	Ndufa9
Ndufa11	1.07271e-11	0.382251	1	1	1.61722e-07	6	Ndufa11
2500002B13Rik	1.11164e-11	0.517111	0.886	0.402	1.6759e-07	6	2500002B13Rik
Atpif1	1.15011e-11	0.353597	1	1	1.7339e-07	6	Atpif1
Ehbp1l1	1.15621e-11	0.465477	1	0.999	1.7431e-07	6	Ehbp1l1
Ndufs1	1.20138e-11	0.478056	1	1	1.8112e-07	6	Ndufs1
Atp5g1	1.27484e-11	0.406294	1	1	1.92195e-07	6	Atp5g1
S100a1	1.28874e-11	0.518224	1	0.997	1.9429e-07	6	S100a1
Cox14	1.40449e-11	0.413126	1	1	2.1174e-07	6	Cox14
Bex41	1.47738e-11	0.506619	1	0.996	2.22729e-07	6	Bex4
Rapsn1	1.58276e-11	0.595406	1	0.651	2.38616e-07	6	Rapsn
Hspe1	1.64819e-11	0.306956	1	1	2.48482e-07	6	Hspe1
Nmrk2	1.67754e-11	0.541222	0.829	0.312	2.52906e-07	6	Nmrk2
Upp1	1.69695e-11	0.613604	0.971	0.528	2.55832e-07	6	Upp1
Rab3ip	1.74158e-11	0.523581	1	0.91	2.6256e-07	6	Rab3ip
Bcam	1.75776e-11	0.411662	1	1	2.64999e-07	6	Bcam
Dlat	1.94175e-11	0.564078	1	0.969	2.92739e-07	6	Dlat
Mfge8	1.94708e-11	0.400159	1	1	2.93542e-07	6	Mfge8
Ndufv2	1.97358e-11	0.420619	1	1	2.97537e-07	6	Ndufv2
Tomm5	2.1392e-11	0.404514	1	1	3.22506e-07	6	Tomm5
Gpr157	2.15841e-11	0.448147	0.686	0.207	3.25401e-07	6	Gpr157
Echs1	2.1666e-11	0.44086	1	1	3.26637e-07	6	Echs1
Ptcd3	2.33925e-11	0.501809	1	0.939	3.52666e-07	6	Ptcd3
Prkag2	2.50267e-11	0.527074	1	0.97	3.77303e-07	6	Prkag2
Got2	2.51181e-11	0.426454	1	1	3.78681e-07	6	Got2
Mrpl51	2.54623e-11	0.371662	1	1	3.83869e-07	6	Mrpl51
Ppp1r1b1	2.72391e-11	0.733133	0.971	0.669	4.10657e-07	6	Ppp1r1b
Atp5h	2.79933e-11	0.391579	1	1	4.22026e-07	6	Atp5h
Hipk3	2.84105e-11	0.451089	1	1	4.28317e-07	6	Hipk3
Pkp2	2.8934e-11	0.556715	1	0.969	4.36209e-07	6	Pkp2
Cdkn2d	3.01964e-11	0.534833	1	0.94	4.5524e-07	6	Cdkn2d
Pdhx	3.28947e-11	0.571452	1	0.819	4.95921e-07	6	Pdhx
Irx2	3.33091e-11	0.68709	0.886	0.396	5.02168e-07	6	Irx2
Ankrd11	3.49843e-11	0.546706	1	1	5.27423e-07	6	Ankrd1
Plbd1	3.57527e-11	0.492516	0.8	0.289	5.39008e-07	6	Plbd1
Mmp15	3.58065e-11	0.521298	1	0.985	5.39819e-07	6	Mmp15
Rbm24	3.66932e-11	0.582725	1	0.949	5.53187e-07	6	Rbm24
Creb5	3.74897e-11	0.507167	0.829	0.327	5.65195e-07	6	Creb5
Phb	3.84114e-11	0.35657	1	1	5.7909e-07	6	Phb
Ndufaf4	3.95918e-11	0.527725	1	0.9	5.96886e-07	6	Ndufaf4
Lama4	4.08395e-11	0.36473	1	0.997	6.15696e-07	6	Lama4
Hspb2	4.50324e-11	0.502568	1	0.994	6.78908e-07	6	Hspb2
Serf2	4.8112e-11	0.298064	1	1	7.25337e-07	6	Serf2
Ndufa8	4.83226e-11	0.398162	1	1	7.28511e-07	6	Ndufa8
Cend1	4.86652e-11	0.494796	0.857	0.328	7.33677e-07	6	Cend1
Uqcc1	5.19812e-11	0.51691	1	0.879	7.83668e-07	6	Uqcc1
Cited1	5.3709e-11	0.517743	1	0.994	8.09717e-07	6	Cited1
Mrpl54	5.38374e-11	0.358571	1	1	8.11653e-07	6	Mrpl54
Atp5c1	5.61039e-11	0.419154	1	1	8.45823e-07	6	Atp5c1
Atp1b1	5.69518e-11	0.462755	1	1	8.58606e-07	6	Atp1b1
Ogdh	5.85171e-11	0.433271	1	1	8.82203e-07	6	Ogdh
Rbpms	6.10613e-11	0.413461	1	0.999	9.2056e-07	6	Rbpms
Fsd2	6.13528e-11	0.587328	1	0.847	9.24955e-07	6	Fsd2
Hint1	6.62836e-11	0.282297	1	1	9.99291e-07	6	Hint1
Pygm	7.22309e-11	0.508701	1	0.988	1.08895e-06	6	Pygm
S1pr1	7.9414e-11	0.606013	0.971	0.873	1.19725e-06	6	S1pr1
Mical2	7.96485e-11	0.462535	1	0.997	1.20078e-06	6	Mical2
Gpr681	8.05612e-11	0.442779	0.714	0.234	1.21454e-06	6	Gpr68
Cacna1c	8.2328e-11	0.511509	1	0.972	1.24118e-06	6	Cacna1c
Fhod3	8.28081e-11	0.570213	1	0.916	1.24842e-06	6	Fhod3
Coq7	8.43607e-11	0.472045	1	0.987	1.27182e-06	6	Coq7
Prkaca	8.68096e-11	0.44017	1	0.999	1.30874e-06	6	Prkaca
Osbpl8	8.97217e-11	0.540953	1	0.963	1.35264e-06	6	Osbpl8
Bmp7	1.02599e-10	0.520593	1	0.99	1.54679e-06	6	Bmp7
Zak	1.06515e-10	0.428955	1	0.999	1.60582e-06	6	Zak
Myo18a	1.06717e-10	0.466435	1	0.991	1.60886e-06	6	Myo18a
Pmpcb	1.1057e-10	0.455752	1	0.994	1.66695e-06	6	Pmpcb
Yipf7	1.1094e-10	0.387028	0.714	0.22	1.67254e-06	6	Yipf7
Gfm1	1.12631e-10	0.519018	1	0.919	1.69802e-06	6	Gfm1
Gmpr	1.17019e-10	0.519525	1	0.949	1.76418e-06	6	Gmpr
Ube2m	1.18243e-10	0.337259	1	1	1.78262e-06	6	Ube2m
Lpl	1.1889e-10	0.503065	1	0.984	1.79238e-06	6	Lpl
Hk1	1.20135e-10	0.495081	1	0.999	1.81116e-06	6	Hk1
Fxyd1	1.2347e-10	0.476789	1	1	1.86143e-06	6	Fxyd1
Gpr22	1.23545e-10	0.488178	0.743	0.253	1.86257e-06	6	Gpr22
Spsb4	1.25936e-10	0.532036	1	0.846	1.89861e-06	6	Spsb4
Ndrg2	1.37106e-10	0.434205	1	0.999	2.06701e-06	6	Ndrg2
Cap2	1.42545e-10	0.510532	1	0.969	2.14901e-06	6	Cap2
Hn1	1.51431e-10	0.34108	1	1	2.28298e-06	6	Hn1
Klhl30	1.54812e-10	0.545282	1	0.859	2.33394e-06	6	Klhl30
Apold1	1.56783e-10	0.559794	0.914	0.466	2.36366e-06	6	Apold1
Cryab	1.57698e-10	0.448265	1	1	2.37746e-06	6	Cryab
Pnpla2	1.59706e-10	0.535658	1	0.856	2.40773e-06	6	Pnpla2
Ndufa6	1.63453e-10	0.341585	1	1	2.46421e-06	6	Ndufa6
Mrps36	1.66009e-10	0.4001	1	0.999	2.50275e-06	6	Mrps36
Ppp1r14c	1.83623e-10	0.543165	1	0.943	2.7683e-06	6	Ppp1r14c
Ftcd	1.84284e-10	0.398944	0.657	0.204	2.77827e-06	6	Ftcd
Adssl1	1.94403e-10	0.557691	1	0.888	2.93082e-06	6	Adssl1
Ppp2r3a	1.94601e-10	0.496256	1	0.979	2.9338e-06	6	Ppp2r3a
Mrpl15	1.94889e-10	0.450565	1	0.99	2.93815e-06	6	Mrpl15
Sdhc	1.96169e-10	0.441346	1	1	2.95744e-06	6	Sdhc
Smyd1	2.11308e-10	0.472926	1	0.996	3.18568e-06	6	Smyd1
Sspn	2.11458e-10	0.542358	1	0.966	3.18794e-06	6	Sspn
Mycn	2.14082e-10	0.563775	0.971	0.657	3.2275e-06	6	Mycn
Sap30	2.17246e-10	0.57145	0.971	0.825	3.27521e-06	6	Sap30
Atp5e	2.18388e-10	0.349108	1	1	3.29242e-06	6	Atp5e
Mtx2	2.20055e-10	0.463168	1	0.993	3.31755e-06	6	Mtx2
Timm8b	2.38698e-10	0.39431	1	1	3.59861e-06	6	Timm8b
Ak1	2.40642e-10	0.500658	1	0.988	3.62792e-06	6	Ak1
Deb1	2.59076e-10	0.495853	1	0.985	3.90583e-06	6	Deb1
Haus82	2.59774e-10	0.553356	1	0.946	3.91635e-06	6	Haus8
Jph2	2.71131e-10	0.433532	1	0.994	4.08756e-06	6	Jph2
Mrpl3	2.71636e-10	0.474252	1	0.967	4.09519e-06	6	Mrpl3
Hibadh	2.76277e-10	0.483981	1	0.927	4.16515e-06	6	Hibadh
Pdha1	2.77391e-10	0.405523	1	1	4.18194e-06	6	Pdha1
Popdc21	2.83113e-10	0.465303	1	0.997	4.26822e-06	6	Popdc2
Ndufb4	2.85862e-10	0.393153	1	1	4.30966e-06	6	Ndufb4
Ndufs8	3.08384e-10	0.396722	1	1	4.6492e-06	6	Ndufs8
Apobec2	3.10821e-10	0.511072	1	0.966	4.68594e-06	6	Apobec2
Fbxl22	3.13824e-10	0.415931	1	1	4.7312e-06	6	Fbxl22
Mtch2	3.19968e-10	0.369539	1	1	4.82384e-06	6	Mtch2
Lmod2	3.21787e-10	0.57612	1	0.646	4.85126e-06	6	Lmod2
Ppp1r3c	3.25855e-10	0.550112	1	0.936	4.91258e-06	6	Ppp1r3c
Avpi1	3.34182e-10	0.505764	1	0.939	5.03813e-06	6	Avpi1
Akap1	3.36533e-10	0.587842	0.971	0.907	5.07356e-06	6	Akap1
Lrrc39	3.36801e-10	0.578615	0.971	0.702	5.07762e-06	6	Lrrc39
Mrps21	3.3894e-10	0.355554	1	1	5.10985e-06	6	Mrps21
Sfrp1	3.98125e-10	0.323091	1	1	6.00213e-06	6	Sfrp1
Cnn11	4.02428e-10	0.358269	1	0.997	6.067e-06	6	Cnn1
Tbca	4.12594e-10	0.328762	1	1	6.22026e-06	6	Tbca
Pde1c	4.23024e-10	0.456601	0.657	0.228	6.37751e-06	6	Pde1c
Etfa	4.29763e-10	0.46882	1	0.994	6.47911e-06	6	Etfa
2022-09-01	4.33321e-10	0.426784	0.943	0.426	6.53275e-06	6	2022-09-01
Kcnh2	4.35674e-10	0.493355	1	0.967	6.56822e-06	6	Kcnh2
2410015M20Rik	4.35718e-10	0.3236	1	1	6.56888e-06	6	2410015M20Rik
Igfbp3	4.65937e-10	0.660491	1	0.898	7.02446e-06	6	Igfbp3
5430431A17Rik	4.67934e-10	0.448115	1	1	7.05457e-06	6	5430431A17Rik
Pkig	4.7259e-10	0.419415	1	1	7.12477e-06	6	Pkig
Gtpbp10	4.7981e-10	0.462535	0.829	0.336	7.23361e-06	6	Gtpbp10
Proser2	4.84207e-10	0.493307	0.829	0.376	7.2999e-06	6	Proser2
Cox8b	5.30108e-10	0.502044	1	0.994	7.99191e-06	6	Cox8b
Camk2d	5.51104e-10	0.493682	1	0.981	8.30845e-06	6	Camk2d
Grhpr	5.54718e-10	0.481656	1	0.912	8.36293e-06	6	Grhpr
Ndufb11	5.55454e-10	0.33625	1	1	8.37403e-06	6	Ndufb11
Ptp4a3	5.65134e-10	0.356862	1	1	8.51996e-06	6	Ptp4a3
Usp28	5.88347e-10	0.471939	1	0.93	8.86992e-06	6	Usp28
Lrrfip2	5.95093e-10	0.464369	1	0.945	8.97162e-06	6	Lrrfip2
Plekhh11	5.99522e-10	0.472506	0.829	0.351	9.0384e-06	6	Plekhh1
Mgst3	5.99912e-10	0.492368	1	0.97	9.04428e-06	6	Mgst3
Adk	6.01262e-10	0.479554	1	0.967	9.06462e-06	6	Adk
Ckb	6.41986e-10	0.393577	1	1	9.67857e-06	6	Ckb
Myl41	7.09099e-10	0.463237	1	1	1.06904e-05	6	Myl4
Slc6a17	7.20983e-10	0.518653	1	0.547	1.08695e-05	6	Slc6a17
Cisd1	7.39193e-10	0.469267	1	0.994	1.11441e-05	6	Cisd1
Esrra	8.11098e-10	0.516141	1	0.945	1.22281e-05	6	Esrra
BC002163	8.1605e-10	0.500459	1	0.945	1.23028e-05	6	BC002163
Phb2	8.29238e-10	0.33785	1	1	1.25016e-05	6	Phb2
Gpx4	8.30794e-10	0.301252	1	1	1.25251e-05	6	Gpx4
2700094K13Rik	8.48794e-10	0.316983	1	1	1.27964e-05	6	2700094K13Rik
Dusp3	8.7109e-10	0.489313	1	0.939	1.31326e-05	6	Dusp3
Azin1	8.72194e-10	0.40587	1	0.997	1.31492e-05	6	Azin1
Nkx2-5	8.86805e-10	0.479202	1	0.985	1.33695e-05	6	Nkx2-5
Fam210a	9.65756e-10	0.514777	0.971	0.837	1.45597e-05	6	Fam210a
Xirp1	9.75994e-10	0.493124	1	0.976	1.47141e-05	6	Xirp1
Nfyc	9.84067e-10	0.421975	1	0.99	1.48358e-05	6	Nfyc
Aifm1	1.01116e-09	0.505543	1	0.96	1.52443e-05	6	Aifm1
Mmd	1.07219e-09	0.429784	1	0.991	1.61644e-05	6	Mmd
Arvcf	1.1378e-09	0.543682	0.971	0.772	1.71535e-05	6	Arvcf
Gata4	1.16774e-09	0.454547	1	0.99	1.76049e-05	6	Gata4
Pelo	1.31653e-09	0.424984	1	0.909	1.98481e-05	6	Pelo
Cmc2	1.31699e-09	0.441042	1	0.976	1.98549e-05	6	Cmc2
Vdac1	1.33752e-09	0.365911	1	1	2.01644e-05	6	Vdac1
Hacd1	1.37544e-09	0.428594	1	0.994	2.07361e-05	6	Hacd1
Map2k1	1.46753e-09	0.494988	1	0.904	2.21245e-05	6	Map2k1
Apoo	1.46907e-09	0.491403	1	0.945	2.21477e-05	6	Apoo
Pebp1	1.51604e-09	0.29831	1	1	2.28558e-05	6	Pebp1
Colq	1.51656e-09	0.450975	0.914	0.391	2.28636e-05	6	Colq
Mrpl18	1.54928e-09	0.406951	1	0.997	2.3357e-05	6	Mrpl18
Pdxp	1.5569e-09	0.576649	1	0.802	2.34719e-05	6	Pdxp
Nabp1	1.66387e-09	0.393086	0.771	0.286	2.50845e-05	6	Nabp1
Itgb1bp2	1.69888e-09	0.559521	0.971	0.838	2.56123e-05	6	Itgb1bp2
Mcee	1.8429e-09	0.464209	1	0.958	2.77836e-05	6	Mcee
Chchd3	1.90104e-09	0.451332	1	0.999	2.866e-05	6	Chchd3
Dstn	1.94093e-09	0.351158	1	1	2.92615e-05	6	Dstn
Mrpl28	1.96697e-09	0.330938	1	1	2.9654e-05	6	Mrpl28
Trp53inp2	2.14967e-09	0.403207	1	0.991	3.24084e-05	6	Trp53inp2
Mrps18b	2.17173e-09	0.397104	1	0.909	3.27411e-05	6	Mrps18b
Ppara	2.20143e-09	0.350944	0.571	0.168	3.31887e-05	6	Ppara
Fdx1	2.22427e-09	0.487076	1	0.874	3.35331e-05	6	Fdx1
Hrc	2.25309e-09	0.437477	1	0.918	3.39676e-05	6	Hrc
Anp32e	2.3256e-09	0.396126	1	0.997	3.50607e-05	6	Anp32e
Pip5k1b	2.4917e-09	0.448903	0.857	0.376	3.75649e-05	6	Pip5k1b
Tgfbr3	2.49799e-09	0.539967	0.943	0.736	3.76597e-05	6	Tgfbr3
Txn2	2.54025e-09	0.333549	1	1	3.82968e-05	6	Txn2
Mrps27	2.62881e-09	0.464203	1	0.892	3.9632e-05	6	Mrps27
[truncated: 19,438 more rows]

## Sheet: Visium_E17.5_DEGs
	p_val	avg_logFC	pct.1	pct.2	p_val_adj	cluster	gene
Myh7	5.73978e-52	0.605983	1	1	9.02811e-48	0	Myh7
Myl2	3.45304e-49	0.605139	1	1	5.43129e-45	0	Myl2
Mb	3.34846e-48	0.713931	1	1	5.2668e-44	0	Mb
Fabp4	4.44099e-41	0.534697	1	1	6.98523e-37	0	Fabp4
Actc1	1.32387e-39	0.339917	1	1	2.08231e-35	0	Actc1
Cox6c	1.27191e-37	0.357605	1	1	2.00059e-33	0	Cox6c
Pln	9.68256e-37	0.500324	1	1	1.52297e-32	0	Pln
Atp5b	1.27499e-36	0.31076	1	1	2.00544e-32	0	Atp5b
Atp5a1	3.50021e-36	0.344476	1	1	5.50548e-32	0	Atp5a1
Tnni1	1.45868e-35	0.358519	1	1	2.29435e-31	0	Tnni1
Myl3	1.76862e-33	0.489653	1	1	2.78187e-29	0	Myl3
Atp5f1	1.08098e-31	0.306825	1	1	1.70028e-27	0	Atp5f1
Fabp3	1.0861e-31	0.505481	1	1	1.70833e-27	0	Fabp3
Idh2	3.43564e-31	0.346532	1	1	5.40392e-27	0	Idh2
Atp5g3	4.6641e-29	0.26858	1	1	7.33617e-25	0	Atp5g3
2010107E04Rik	9.86659e-29	0.328397	1	1	1.55192e-24	0	2010107E04Rik
Sdha	2.65965e-28	0.360755	1	1	4.18337e-24	0	Sdha
Tnnt2	3.68593e-28	0.339345	1	1	5.79761e-24	0	Tnnt2
Cox4i1	4.30093e-28	0.272351	1	1	6.76493e-24	0	Cox4i1
Slc25a3	4.71689e-28	0.266255	1	1	7.4192e-24	0	Slc25a3
Cyc1	5.24462e-28	0.308453	1	1	8.24926e-24	0	Cyc1
Ptgds	8.17706e-28	0.458744	1	0.986	1.28617e-23	0	Ptgds
Uqcrfs1	8.66642e-28	0.333497	1	1	1.36314e-23	0	Uqcrfs1
Atp5k	1.12595e-27	0.287924	1	1	1.771e-23	0	Atp5k
Ndufa5	1.14854e-27	0.296898	1	1	1.80655e-23	0	Ndufa5
Minos1	1.59427e-26	0.28602	1	1	2.50762e-22	0	Minos1
Usmg5	1.64716e-26	0.308817	1	1	2.59082e-22	0	Usmg5
Hspa9	5.07293e-26	0.304331	1	1	7.97922e-22	0	Hspa9
Mybpc3	8.9061e-26	0.344001	1	1	1.40084e-21	0	Mybpc3
Fhl2	1.08699e-25	0.402951	1	1	1.70972e-21	0	Fhl2
Idh3g	1.26459e-25	0.301845	1	1	1.98907e-21	0	Idh3g
Uqcr10	3.35708e-25	0.261591	1	1	5.28035e-21	0	Uqcr10
Cox20	3.92328e-25	0.324392	1	0.999	6.17093e-21	0	Cox20
Ivns1abp	4.90564e-25	0.311035	1	1	7.71608e-21	0	Ivns1abp
Crip2	5.10905e-25	0.320311	1	1	8.03602e-21	0	Crip2
Eci1	5.39111e-25	0.385486	1	0.996	8.47968e-21	0	Eci1
Sh3bgr	2.51271e-24	0.347877	1	0.998	3.95224e-20	0	Sh3bgr
Uqcr11	2.83433e-24	0.275699	1	1	4.45812e-20	0	Uqcr11
Sh3kbp1	9.3356e-24	0.403819	1	0.977	1.4684e-19	0	Sh3kbp1
Etfa	1.05851e-23	0.3159	1	1	1.66493e-19	0	Etfa
Myh7b	1.32616e-23	0.442476	1	0.933	2.08592e-19	0	Myh7b
Ttn	1.38712e-23	0.297344	1	1	2.1818e-19	0	Ttn
Cd36	2.21886e-23	0.359901	1	0.998	3.49004e-19	0	Cd36
Cox7a2	2.51792e-23	0.260026	1	1	3.96044e-19	0	Cox7a2
Mt1	3.6491e-23	0.300239	1	1	5.73967e-19	0	Mt1
Uqcrc2	4.03176e-23	0.304907	1	1	6.34155e-19	0	Uqcrc2
Ndufs6	6.83064e-23	0.300363	1	1	1.07439e-18	0	Ndufs6
Cox17	7.92064e-23	0.295441	1	1	1.24584e-18	0	Cox17
Cox5b	1.12254e-22	0.255964	1	1	1.76564e-18	0	Cox5b
Uqcrc1	1.24719e-22	0.255181	1	1	1.9617e-18	0	Uqcrc1
Mdh1	1.25767e-22	0.282605	1	1	1.97819e-18	0	Mdh1
Cycs	2.44327e-22	0.290968	1	1	3.84301e-18	0	Cycs
Cox8b	2.66871e-22	0.322846	1	1	4.19761e-18	0	Cox8b
Aldoa	2.69806e-22	0.251215	1	1	4.24378e-18	0	Aldoa
Uqcrb	3.0625e-22	0.271977	1	1	4.81701e-18	0	Uqcrb
Sdhb	5.01532e-22	0.269714	1	1	7.8886e-18	0	Sdhb
Ndufc1	6.53554e-22	0.253339	1	1	1.02797e-17	0	Ndufc1
Sorbs2	1.59716e-21	0.344981	1	0.995	2.51217e-17	0	Sorbs2
Ldhb	2.54868e-21	0.273423	1	1	4.00882e-17	0	Ldhb
Smyd2	5.31093e-21	0.348247	1	0.986	8.35357e-17	0	Smyd2
Hey2	1.8418e-20	0.455892	0.979	0.831	2.89696e-16	0	Hey2
Cox5a	2.38548e-20	0.285973	1	1	3.75212e-16	0	Cox5a
Crat	2.3945e-20	0.312116	1	1	3.76631e-16	0	Crat
Rbp7	3.45876e-20	0.479618	0.91	0.706	5.44028e-16	0	Rbp7
Pgk1	3.72824e-20	0.262768	1	1	5.86415e-16	0	Pgk1
Slc25a4	3.83277e-20	0.274187	1	1	6.02857e-16	0	Slc25a4
Cox7a1	5.28314e-20	0.292745	1	0.999	8.30984e-16	0	Cox7a1
Acadl	6.54197e-20	0.303611	1	1	1.02899e-15	0	Acadl
Actn2	7.91872e-20	0.29248	1	1	1.24554e-15	0	Actn2
Got2	9.25667e-20	0.268199	1	1	1.45598e-15	0	Got2
Pdhb	1.26923e-19	0.281405	1	1	1.99638e-15	0	Pdhb
Ndufs2	2.05854e-19	0.25049	1	1	3.23788e-15	0	Ndufs2
Mrpl12	2.55698e-19	0.272997	1	0.999	4.02188e-15	0	Mrpl12
Acot13	3.20839e-19	0.325958	1	0.999	5.04647e-15	0	Acot13
Acadm	3.54803e-19	0.284515	1	1	5.5807e-15	0	Acadm
Acads	4.86228e-19	0.316744	1	0.994	7.64789e-15	0	Acads
Mrpl42	1.11729e-18	0.263089	1	1	1.75739e-14	0	Mrpl42
Ppip5k2	1.22563e-18	0.357199	0.979	0.889	1.92779e-14	0	Ppip5k2
Ddc	1.24652e-18	0.396429	1	0.915	1.96066e-14	0	Ddc
Vegfb	1.98387e-18	0.275895	1	0.999	3.12044e-14	0	Vegfb
Pnkd	2.51945e-18	0.259862	1	1	3.96284e-14	0	Pnkd
Pkig	3.73413e-18	0.291407	1	0.999	5.87342e-14	0	Pkig
Cluh	5.91126e-18	0.298591	1	0.998	9.29782e-14	0	Cluh
Lta4h	7.54665e-18	0.29627	1	0.99	1.18701e-13	0	Lta4h
Echs1	9.95439e-18	0.271086	1	0.998	1.56573e-13	0	Echs1
Pdk1	3.4212e-17	0.306475	1	0.996	5.3812e-13	0	Pdk1
Osbpl8	3.52301e-17	0.335923	0.993	0.922	5.54134e-13	0	Osbpl8
Lbh	3.9885e-17	0.329383	1	0.997	6.27351e-13	0	Lbh
Pkp2	4.56831e-17	0.351645	1	0.95	7.1855e-13	0	Pkp2
Acsl1	4.6361e-17	0.29391	1	0.987	7.29212e-13	0	Acsl1
Sdhd	1.19867e-16	0.258142	1	1	1.88539e-12	0	Sdhd
Sparcl1	1.19927e-16	0.289696	1	0.987	1.88634e-12	0	Sparcl1
Higd1a	1.46872e-16	0.250098	1	1	2.31014e-12	0	Higd1a
Hopx	1.48896e-16	0.321597	1	0.998	2.34199e-12	0	Hopx
Kcnip2	1.94067e-16	0.338674	0.889	0.617	3.05248e-12	0	Kcnip2
Adck3	2.51198e-16	0.341095	0.986	0.868	3.95109e-12	0	Adck3
Lmo7	2.62374e-16	0.286734	1	0.997	4.12687e-12	0	Lmo7
Tnni3	2.6751e-16	0.258435	1	1	4.20767e-12	0	Tnni3
Ndrg2	3.51242e-16	0.263021	1	0.998	5.52469e-12	0	Ndrg2
Mgll	5.80449e-16	0.325317	0.958	0.895	9.12989e-12	0	Mgll
Aldh1b1	6.85537e-16	0.297839	1	0.984	1.07828e-11	0	Aldh1b1
Cdh2	7.84311e-16	0.301777	1	0.978	1.23364e-11	0	Cdh2
Irx4	1.84456e-15	0.343108	0.965	0.741	2.9013e-11	0	Irx4
Col15a1	2.53921e-15	0.314047	1	0.946	3.99392e-11	0	Col15a1
Gpihbp1	7.52536e-15	0.36231	0.951	0.863	1.18366e-10	0	Gpihbp1
Dsp	9.43861e-15	0.265746	1	0.995	1.4846e-10	0	Dsp
Bves	1.66386e-14	0.262167	1	0.991	2.61709e-10	0	Bves
Sucla2	4.17072e-14	0.250706	1	0.999	6.56013e-10	0	Sucla2
Stard7	4.50405e-14	0.260931	1	0.992	7.08442e-10	0	Stard7
Gja1	7.19261e-14	0.263506	1	0.996	1.13133e-09	0	Gja1
Rbm24	7.96257e-14	0.27124	1	0.985	1.25243e-09	0	Rbm24
Fhod3	8.17894e-14	0.280316	1	0.968	1.28647e-09	0	Fhod3
Suclg2	2.59963e-13	0.265945	1	0.981	4.08896e-09	0	Suclg2
Got1	3.3891e-13	0.267023	1	0.993	5.33072e-09	0	Got1
Trim63	5.65928e-13	0.282627	1	0.972	8.90148e-09	0	Trim63
Myo18b	5.6784e-13	0.26817	1	0.98	8.93155e-09	0	Myo18b
8430408G22Rik	6.24356e-13	0.318926	0.917	0.787	9.8205e-09	0	8430408G22Rik
Clasp1	1.24474e-12	0.281145	1	0.981	1.95785e-08	0	Clasp1
Efnb3	1.30853e-12	0.349281	0.861	0.745	2.05819e-08	0	Efnb3
Adssl1	5.64336e-12	0.290165	1	0.956	8.87645e-08	0	Adssl1
Pdk2	6.53126e-12	0.277665	1	0.983	1.0273e-07	0	Pdk2
Fam134b	1.86576e-11	0.306159	0.889	0.8	2.93465e-07	0	Fam134b
Slc25a13	2.87039e-11	0.294012	0.861	0.66	4.51483e-07	0	Slc25a13
Lpar3	3.96094e-11	0.296079	0.847	0.591	6.23016e-07	0	Lpar3
Ide	5.74102e-11	0.255002	1	0.953	9.03005e-07	0	Ide
Higd1b	7.69203e-11	0.280961	0.556	0.292	1.20988e-06	0	Higd1b
Fsd2	9.22904e-11	0.262797	1	0.944	1.45163e-06	0	Fsd2
Ppp1r1b	1.15761e-10	0.289282	0.868	0.729	1.8208e-06	0	Ppp1r1b
Coq6	2.6385e-10	0.270033	0.993	0.942	4.1501e-06	0	Coq6
Cacna1c	9.38192e-10	0.265531	0.986	0.956	1.47568e-05	0	Cacna1c
Tcf15	1.85509e-09	0.288245	0.667	0.453	2.91787e-05	0	Tcf15
Rbm20	1.98031e-09	0.25129	0.993	0.957	3.11484e-05	0	Rbm20
Pdgfb	2.18547e-09	0.276964	0.743	0.533	3.43752e-05	0	Pdgfb
Kcnq1	1.95421e-08	0.255253	0.882	0.706	0.000307378	0	Kcnq1
Carns1	2.69588e-07	0.253465	0.785	0.639	0.00424035	0	Carns1
Ybx2	4.58199e-07	0.256311	0.639	0.457	0.00720701	0	Ybx2
Gimap4	1.42303e-06	0.250535	0.743	0.625	0.0223828	0	Gimap4
Cox5a1	7.29935e-49	0.498064	1	1	1.14812e-44	1	Cox5a
Tnnc1	8.00104e-46	0.391618	1	1	1.25848e-41	1	Tnnc1
Cycs1	1.75358e-45	0.453153	1	1	2.75821e-41	1	Cycs
Gapdh	3.08041e-45	0.369344	1	1	4.84518e-41	1	Gapdh
Cox5b1	1.18723e-44	0.410005	1	1	1.86739e-40	1	Cox5b
Cox6c1	3.91961e-44	0.416861	1	1	6.16515e-40	1	Cox6c
Cox7c	1.48972e-43	0.372468	1	1	2.34318e-39	1	Cox7c
2010107E04Rik1	2.05991e-43	0.42981	1	1	3.24003e-39	1	2010107E04Rik
Uqcrb1	1.30704e-42	0.420926	1	1	2.05584e-38	1	Uqcrb
Usmg51	1.03517e-41	0.416174	1	1	1.62822e-37	1	Usmg5
Cox4i11	3.06412e-41	0.363701	1	1	4.81956e-37	1	Cox4i1
Slc25a41	3.87994e-41	0.383883	1	1	6.10276e-37	1	Slc25a4
Fabp31	1.72916e-40	0.621247	1	1	2.71979e-36	1	Fabp3
Atp5g1	2.35005e-40	0.398589	1	1	3.69639e-36	1	Atp5g1
Uqcr111	3.82956e-40	0.376751	1	1	6.02352e-36	1	Uqcr11
Pkm	5.91786e-39	0.361426	1	1	9.3082e-35	1	Pkm
Ndufa51	8.09966e-39	0.390902	1	1	1.274e-34	1	Ndufa5
Actn21	1.38788e-38	0.447105	1	1	2.183e-34	1	Actn2
Atp5j2	2.40255e-38	0.332998	1	1	3.77897e-34	1	Atp5j2
Cox7a21	2.92316e-38	0.355605	1	1	4.59784e-34	1	Cox7a2
Ndufab1	3.49441e-38	0.480037	1	1	5.49636e-34	1	Ndufab1
Atp5h	3.87584e-38	0.352663	1	1	6.09631e-34	1	Atp5h
Cox6a1	4.21288e-38	0.374751	1	1	6.62644e-34	1	Cox6a1
Mif	5.06248e-38	0.404235	1	1	7.96277e-34	1	Mif
Atpif1	2.42083e-37	0.319623	1	1	3.80772e-33	1	Atpif1
Tnnt21	2.65425e-37	0.38304	1	1	4.17487e-33	1	Tnnt2
Minos11	3.06725e-37	0.390132	1	1	4.82447e-33	1	Minos1
Aldoa1	3.96352e-37	0.373058	1	1	6.23423e-33	1	Aldoa
Chchd10	1.03637e-36	0.393734	1	1	1.6301e-32	1	Chchd10
Atp5k1	3.4829e-36	0.364304	1	1	5.47825e-32	1	Atp5k
Ndufs61	3.48739e-36	0.430799	1	1	5.48531e-32	1	Ndufs6
Ndufc11	4.01164e-36	0.36084	1	1	6.30991e-32	1	Ndufc1
Tnni11	4.30767e-36	0.399019	1	1	6.77553e-32	1	Tnni1
Ndufb8	6.18552e-36	0.396925	1	1	9.72921e-32	1	Ndufb8
Ndufv3	7.25521e-36	0.377261	1	1	1.14117e-31	1	Ndufv3
Cox8a	1.22582e-35	0.298802	1	1	1.92809e-31	1	Cox8a
Atp5l	1.41944e-35	0.327089	1	1	2.23264e-31	1	Atp5l
Myl31	1.94542e-35	0.518254	1	1	3.05995e-31	1	Myl3
Cox6b1	2.27989e-35	0.325645	1	1	3.58604e-31	1	Cox6b1
Mybpc31	2.52268e-35	0.428333	1	1	3.96792e-31	1	Mybpc3
Slc25a31	2.56456e-35	0.337575	1	1	4.0338e-31	1	Slc25a3
Ndufa12	4.95771e-35	0.353429	1	1	7.79798e-31	1	Ndufa12
Crip21	5.61402e-35	0.425724	1	1	8.83029e-31	1	Crip2
Cyc11	6.18183e-35	0.393337	1	1	9.72341e-31	1	Cyc1
Pln1	6.39601e-35	0.537593	1	1	1.00603e-30	1	Pln
Chchd2	7.2193e-35	0.278301	1	1	1.13552e-30	1	Chchd2
Ndufa6	8.17893e-35	0.311916	1	1	1.28646e-30	1	Ndufa6
Tpm1	1.49446e-34	0.3322	1	1	2.35064e-30	1	Tpm1
Atp5a11	2.21015e-34	0.37258	1	1	3.47635e-30	1	Atp5a1
Atp5j	2.23838e-34	0.310153	1	1	3.52075e-30	1	Atp5j
Mdh11	2.61658e-34	0.378367	1	1	4.11562e-30	1	Mdh1
Ndufb9	4.98482e-34	0.34521	1	1	7.84062e-30	1	Ndufb9
Acsl11	1.00283e-33	0.586151	1	0.987	1.57736e-29	1	Acsl1
Tpi1	1.14143e-33	0.353176	1	1	1.79536e-29	1	Tpi1
Higd1a1	1.6558e-33	0.433523	1	1	2.60441e-29	1	Higd1a
Uqcrq	2.15488e-33	0.345107	1	1	3.38941e-29	1	Uqcrq
Mt11	2.42316e-33	0.414494	1	1	3.81139e-29	1	Mt1
Atp5d	5.9491e-33	0.303227	1	1	9.35733e-29	1	Atp5d
Cox6a2	8.8948e-33	0.399769	1	1	1.39906e-28	1	Cox6a2
Uqcrfs11	1.30025e-32	0.408125	1	1	2.04516e-28	1	Uqcrfs1
Cox7b	1.31889e-32	0.311393	1	1	2.07449e-28	1	Cox7b
Uqcr101	1.50764e-32	0.32441	1	1	2.37137e-28	1	Uqcr10
Ndufa4	3.46472e-32	0.283388	1	1	5.44966e-28	1	Ndufa4
Mrpl121	3.57024e-32	0.416809	1	0.999	5.61563e-28	1	Mrpl12
Vegfb1	3.89638e-32	0.421274	1	0.999	6.12862e-28	1	Vegfb
Bex1	4.04327e-32	0.546218	1	0.991	6.35966e-28	1	Bex1
Ndufb10	4.15496e-32	0.37868	1	1	6.53534e-28	1	Ndufb10
Got11	4.41046e-32	0.509081	1	0.993	6.93722e-28	1	Got1
Myh71	9.16245e-32	0.54339	1	1	1.44116e-27	1	Myh7
Hspe1	9.8951e-32	0.311198	1	1	1.5564e-27	1	Hspe1
Crat1	5.00372e-31	0.480167	1	1	7.87035e-27	1	Crat
Ndufa2	5.69909e-31	0.282407	1	1	8.96411e-27	1	Ndufa2
Tnni31	9.27819e-31	0.334718	1	1	1.45937e-26	1	Tnni3
Atp5o	3.94992e-30	0.292017	1	1	6.21284e-26	1	Atp5o
Ndufs7	5.27915e-30	0.360672	1	1	8.30358e-26	1	Ndufs7
Acadl1	6.18806e-30	0.40739	1	1	9.73319e-26	1	Acadl
Uqcrc21	7.20883e-30	0.395885	1	1	1.13388e-25	1	Uqcrc2
Uqcrh	7.80005e-30	0.30049	1	1	1.22687e-25	1	Uqcrh
Idh21	1.15789e-29	0.383577	1	1	1.82125e-25	1	Idh2
Cox201	1.5179e-29	0.400952	1	0.999	2.38751e-25	1	Cox20
Lbh1	1.73044e-29	0.485817	1	0.997	2.72181e-25	1	Lbh
Ogdh	2.2443e-29	0.382384	1	1	3.53007e-25	1	Ogdh
Atp5c1	2.82828e-29	0.314808	1	1	4.44859e-25	1	Atp5c1
Sdhd1	3.10927e-29	0.406949	1	1	4.89057e-25	1	Sdhd
Bola3	5.66263e-29	0.392334	1	1	8.90675e-25	1	Bola3
Ndufb2	6.83243e-29	0.321774	1	1	1.07467e-24	1	Ndufb2
Sod2	1.16925e-28	0.397021	1	1	1.83911e-24	1	Sod2
Atp5f11	1.28589e-28	0.325007	1	1	2.02257e-24	1	Atp5f1
Hspb1	2.33131e-28	0.325175	1	1	3.66692e-24	1	Hspb1
Ndufb6	5.75074e-28	0.32048	1	1	9.04534e-24	1	Ndufb6
Ndufs21	6.95774e-28	0.337868	1	1	1.09438e-23	1	Ndufs2
Mpc2	9.84635e-28	0.3658	1	1	1.54873e-23	1	Mpc2
Cox7a11	1.35229e-27	0.377548	1	0.999	2.12701e-23	1	Cox7a1
Bves1	2.67538e-27	0.487544	1	0.992	4.20811e-23	1	Bves
Ndufb7	3.66747e-27	0.321757	1	1	5.76857e-23	1	Ndufb7
Mdh2	3.96091e-27	0.300435	1	1	6.23012e-23	1	Mdh2
Mrpl421	4.0228e-27	0.349406	1	1	6.32746e-23	1	Mrpl42
Got21	4.51989e-27	0.371219	1	1	7.10933e-23	1	Got2
Pgk11	4.99442e-27	0.355276	1	1	7.85572e-23	1	Pgk1
Sdha1	5.37636e-27	0.385732	1	1	8.45647e-23	1	Sdha
Sdhb1	6.48099e-27	0.349816	1	1	1.01939e-22	1	Sdhb
Fam162a	8.6131e-27	0.373944	1	1	1.35475e-22	1	Fam162a
Rbm201	1.00797e-26	0.504038	1	0.958	1.58543e-22	1	Rbm20
Cs	1.01037e-26	0.341765	1	1	1.58922e-22	1	Cs
Cox8b1	1.13058e-26	0.443638	1	1	1.7783e-22	1	Cox8b
Ndufb5	1.32943e-26	0.314928	1	1	2.09106e-22	1	Ndufb5
Ndufc2	1.34548e-26	0.294053	1	1	2.11631e-22	1	Ndufc2
Acot131	1.39138e-26	0.440685	1	0.999	2.1885e-22	1	Acot13
Ndufa11	1.58687e-26	0.266717	1	1	2.49599e-22	1	Ndufa11
Uqcrc11	2.22547e-26	0.321055	1	1	3.50044e-22	1	Uqcrc1
Pkp21	3.78104e-26	0.527492	1	0.952	5.9472e-22	1	Pkp2
C1qbp	3.89177e-26	0.408834	1	1	6.12136e-22	1	C1qbp
Echs11	4.41051e-26	0.370804	1	0.998	6.93729e-22	1	Echs1
Ndufb4	5.6281e-26	0.302118	1	1	8.85244e-22	1	Ndufb4
Asb2	7.8837e-26	0.409001	1	0.998	1.24003e-21	1	Asb2
Mfn2	8.89204e-26	0.424749	1	0.998	1.39863e-21	1	Mfn2
Cox171	1.24717e-25	0.359919	1	1	1.96168e-21	1	Cox17
Fam195a	1.26568e-25	0.451511	1	0.994	1.99079e-21	1	Fam195a
Ttn1	1.651e-25	0.334475	1	1	2.59685e-21	1	Ttn
Nrap	1.88203e-25	0.475714	1	0.981	2.96025e-21	1	Nrap
Atp5b1	2.02783e-25	0.293459	1	1	3.18958e-21	1	Atp5b
Ndufa13	2.14148e-25	0.263865	1	1	3.36834e-21	1	Ndufa13
Cryab	2.18961e-25	0.320237	1	1	3.44404e-21	1	Cryab
Sorbs21	2.60931e-25	0.43302	1	0.995	4.10419e-21	1	Sorbs2
Pdhb1	2.71497e-25	0.358318	1	1	4.27037e-21	1	Pdhb
Mrpl18	3.16776e-25	0.387371	1	0.998	4.98257e-21	1	Mrpl18
Sh3bgr1	4.04453e-25	0.410179	1	0.998	6.36164e-21	1	Sh3bgr
Cav3	7.11226e-25	0.423325	1	0.989	1.11869e-20	1	Cav3
Eno3	8.43358e-25	0.345475	1	1	1.32652e-20	1	Eno3
Dlst	9.66203e-25	0.386966	1	1	1.51974e-20	1	Dlst
Ndufs3	1.10982e-24	0.320234	1	1	1.74563e-20	1	Ndufs3
Idh3b	1.45624e-24	0.340553	1	1	2.29051e-20	1	Idh3b
Ppp1r14c	1.48355e-24	0.450516	1	0.981	2.33348e-20	1	Ppp1r14c
Slc25a5	1.53007e-24	0.304689	1	1	2.40665e-20	1	Slc25a5
Ndufv2	1.56231e-24	0.293258	1	1	2.45736e-20	1	Ndufv2
Hcfc1r1	1.60478e-24	0.276907	1	1	2.52416e-20	1	Hcfc1r1
Hacd1	1.9243e-24	0.358591	1	0.998	3.02673e-20	1	Hacd1
Lmo71	3.93096e-24	0.424278	1	0.997	6.18301e-20	1	Lmo7
Pnkd1	4.05594e-24	0.361973	1	1	6.37959e-20	1	Pnkd
Ldha	4.90661e-24	0.310799	1	1	7.7176e-20	1	Ldha
Ndufb11	5.49095e-24	0.263047	1	1	8.63672e-20	1	Ndufb11
Des	5.9281e-24	0.324261	1	0.999	9.32431e-20	1	Des
Ddc1	6.67454e-24	0.634083	0.99	0.919	1.04984e-19	1	Ddc
Gyg	7.26034e-24	0.375789	1	0.998	1.14198e-19	1	Gyg
Ghitm	7.74517e-24	0.329874	1	1	1.21824e-19	1	Ghitm
Ndufa8	7.99636e-24	0.33648	1	1	1.25775e-19	1	Ndufa8
Vdac1	8.20757e-24	0.298031	1	1	1.29097e-19	1	Vdac1
2410015M20Rik	9.67643e-24	0.300844	1	1	1.52201e-19	1	2410015M20Rik
Vdac2	1.12669e-23	0.291176	1	1	1.77217e-19	1	Vdac2
Irx41	1.28323e-23	0.577747	0.98	0.748	2.01839e-19	1	Irx4
Sucla21	2.02498e-23	0.3828	1	0.999	3.18509e-19	1	Sucla2
Flnc	2.79498e-23	0.329468	1	0.997	4.39622e-19	1	Flnc
Cluh1	2.98194e-23	0.40154	1	0.998	4.6903e-19	1	Cluh
Pde4dip	3.32519e-23	0.389035	1	0.991	5.23019e-19	1	Pde4dip
Pkig1	3.68549e-23	0.350657	1	0.999	5.79691e-19	1	Pkig
Mrpl51	4.01425e-23	0.334936	1	1	6.31401e-19	1	Mrpl51
Idh3a	4.1727e-23	0.358896	1	0.998	6.56324e-19	1	Idh3a
Hspa91	4.26292e-23	0.328959	1	1	6.70514e-19	1	Hspa9
Strip2	5.71343e-23	0.48546	1	0.923	8.98666e-19	1	Strip2
Ivns1abp1	9.84671e-23	0.356697	1	1	1.54879e-18	1	Ivns1abp
Ndufv1	1.0814e-22	0.315718	1	1	1.70093e-18	1	Ndufv1
S100a1	1.19444e-22	0.383678	1	0.998	1.87874e-18	1	S100a1
Ndrg21	1.98664e-22	0.342646	1	0.998	3.12479e-18	1	Ndrg2
Immt	2.6432e-22	0.34399	1	1	4.15748e-18	1	Immt
Pla2g16	2.65675e-22	0.412698	1	0.99	4.17881e-18	1	Pla2g16
Hadhb	2.7979e-22	0.3528	1	0.999	4.40082e-18	1	Hadhb
Acads1	2.89726e-22	0.393633	1	0.994	4.5571e-18	1	Acads
Hspd1	6.93195e-22	0.317237	1	1	1.09033e-17	1	Hspd1
Mrps36	7.24871e-22	0.319424	1	0.999	1.14015e-17	1	Mrps36
Coq7	8.49322e-22	0.413336	1	0.989	1.3359e-17	1	Coq7
Fh1	8.88816e-22	0.335827	1	1	1.39802e-17	1	Fh1
Ptges3l	2.21964e-21	0.418138	1	0.964	3.49127e-17	1	Ptges3l
Mb1	2.304e-21	0.557632	1	1	3.62395e-17	1	Mb
Gbas	2.87252e-21	0.358817	1	0.999	4.51818e-17	1	Gbas
Ndufa10	3.07841e-21	0.382721	1	0.989	4.84202e-17	1	Ndufa10
Ptgds1	3.08747e-21	0.466712	1	0.986	4.85628e-17	1	Ptgds
Ndufb3	3.56791e-21	0.289254	1	1	5.61196e-17	1	Ndufb3
Dsp1	4.34316e-21	0.368015	1	0.995	6.83136e-17	1	Dsp
Gpi1	5.33321e-21	0.255352	1	1	8.3886e-17	1	Gpi1
Ldhb1	5.52146e-21	0.30863	1	1	8.6847e-17	1	Ldhb
Smyd21	6.22161e-21	0.408583	1	0.986	9.78597e-17	1	Smyd2
Kcne1	1.12846e-20	0.515862	1	0.946	1.77496e-16	1	Kcne1
Ckb	1.27367e-20	0.314337	1	1	2.00336e-16	1	Ckb
Pdlim5	1.45965e-20	0.333913	1	0.998	2.29589e-16	1	Pdlim5
Txn2	1.51147e-20	0.318681	1	1	2.3774e-16	1	Txn2
Mrps21	1.60962e-20	0.278417	1	1	2.53177e-16	1	Mrps21
Smpx	1.72553e-20	0.341812	1	1	2.71409e-16	1	Smpx
Gys1	1.74594e-20	0.409522	1	0.99	2.74619e-16	1	Gys1
Fbxl22	1.77319e-20	0.321858	1	0.999	2.78904e-16	1	Fbxl22
Phyh	1.9581e-20	0.39018	1	0.994	3.0799e-16	1	Phyh
Tomm40	2.01293e-20	0.361636	1	0.993	3.16613e-16	1	Tomm40
1110001J03Rik	2.44948e-20	0.296975	1	0.999	3.85279e-16	1	1110001J03Rik
Slc25a11	2.5414e-20	0.330037	1	1	3.99737e-16	1	Slc25a11
Ckm	2.54247e-20	0.261292	1	1	3.99905e-16	1	Ckm
Ndufs4	2.99608e-20	0.290817	1	1	4.71253e-16	1	Ndufs4
Asb11	3.40173e-20	0.471444	0.97	0.678	5.35058e-16	1	Asb11
Pdha1	3.68045e-20	0.283587	1	1	5.78897e-16	1	Pdha1
Mrpl34	3.70942e-20	0.318239	1	1	5.83455e-16	1	Mrpl34
Tomm5	4.09319e-20	0.306275	1	1	6.43819e-16	1	Tomm5
Nnt	4.31027e-20	0.342071	1	0.999	6.77962e-16	1	Nnt
Pfkp	6.69314e-20	0.396833	1	0.995	1.05276e-15	1	Pfkp
Bnip3	6.9773e-20	0.400579	1	0.993	1.09746e-15	1	Bnip3
Myh7b1	1.0503e-19	0.489678	1	0.935	1.65202e-15	1	Myh7b
Etfb	1.26227e-19	0.264106	1	1	1.98542e-15	1	Etfb
Myo18b1	1.29593e-19	0.371833	1	0.98	2.03838e-15	1	Myo18b
Lclat1	1.57811e-19	0.470669	0.98	0.912	2.48222e-15	1	Lclat1
Emc6	1.68317e-19	0.337457	1	0.998	2.64746e-15	1	Emc6
Atp5g31	1.75592e-19	0.251407	1	1	2.76189e-15	1	Atp5g3
Fkbp3	2.29336e-19	0.300961	1	0.999	3.60723e-15	1	Fkbp3
Myl21	2.31065e-19	0.489631	1	1	3.63441e-15	1	Myl2
Pgm2	2.59953e-19	0.332298	1	0.997	4.0888e-15	1	Pgm2
Acadvl	2.64433e-19	0.359182	1	0.998	4.15927e-15	1	Acadvl
Fhod31	2.67164e-19	0.416332	1	0.969	4.20222e-15	1	Fhod3
Hadha	3.18662e-19	0.302515	1	1	5.01224e-15	1	Hadha
Mpc1	3.22302e-19	0.321677	1	1	5.06949e-15	1	Mpc1
Nop10	3.74625e-19	0.256301	1	1	5.89248e-15	1	Nop10
Ears2	4.13396e-19	0.442685	0.98	0.905	6.5023e-15	1	Ears2
Oxct1	5.43721e-19	0.301437	1	1	8.55218e-15	1	Oxct1
Acadm1	6.7194e-19	0.325977	1	1	1.05689e-14	1	Acadm
Popdc2	8.27682e-19	0.330314	1	0.995	1.30186e-14	1	Popdc2
Timm10	8.88825e-19	0.374781	1	0.989	1.39803e-14	1	Timm10
Tcap	1.43553e-18	0.394309	1	0.994	2.25794e-14	1	Tcap
Hn1	2.04592e-18	0.252989	1	1	3.21803e-14	1	Hn1
Deb1	2.1067e-18	0.330245	1	0.998	3.31363e-14	1	Deb1
Phb2	2.27654e-18	0.305675	1	1	3.58077e-14	1	Phb2
Cisd1	2.35148e-18	0.348375	1	1	3.69864e-14	1	Cisd1
Jph2	2.72293e-18	0.351454	1	0.991	4.2829e-14	1	Jph2
Mrpl30	2.81458e-18	0.299748	1	1	4.42705e-14	1	Mrpl30
Ndrg4	2.82833e-18	0.341767	1	0.994	4.44868e-14	1	Ndrg4
Tubb2b	3.53028e-18	0.414419	1	0.974	5.55278e-14	1	Tubb2b
Ube2s	3.72366e-18	0.260212	1	1	5.85694e-14	1	Ube2s
Rbpms2	3.80784e-18	0.417567	1	0.951	5.98936e-14	1	Rbpms2
Cmc2	4.05306e-18	0.368648	1	0.983	6.37506e-14	1	Cmc2
Eci11	4.13006e-18	0.343467	1	0.996	6.49617e-14	1	Eci1
Sh3kbp11	4.47548e-18	0.399314	1	0.977	7.03948e-14	1	Sh3kbp1
Ybx21	6.0012e-18	0.455385	0.82	0.45	9.43929e-14	1	Ybx2
Mrpl53	6.2943e-18	0.329098	1	0.999	9.9003e-14	1	Mrpl53
Ppif	6.65151e-18	0.358572	1	0.991	1.04622e-13	1	Ppif
Dnajc15	6.81073e-18	0.336158	1	0.998	1.07126e-13	1	Dnajc15
Csrp3	8.26919e-18	0.277295	1	1	1.30066e-13	1	Csrp3
Coq5	9.44553e-18	0.417888	0.99	0.904	1.48569e-13	1	Coq5
Hspb6	9.75546e-18	0.386406	1	0.973	1.53444e-13	1	Hspb6
Mgst3	1.28568e-17	0.335356	1	0.998	2.02225e-13	1	Mgst3
Nmrk2	1.31881e-17	0.608986	0.91	0.61	2.07435e-13	1	Nmrk2
Snap91	1.4424e-17	0.404315	1	0.952	2.26875e-13	1	Snap91
Anapc13	1.50878e-17	0.253714	1	1	2.37315e-13	1	Anapc13
Slc8a1	1.75905e-17	0.293255	1	0.998	2.76681e-13	1	Slc8a1
Ndufs1	2.21154e-17	0.293376	1	0.998	3.47853e-13	1	Ndufs1
Hopx1	2.72933e-17	0.38818	1	0.998	4.29297e-13	1	Hopx
Mtfp1	2.88105e-17	0.442431	0.93	0.651	4.53161e-13	1	Mtfp1
Nkx2-5	3.38032e-17	0.367883	1	0.983	5.3169e-13	1	Nkx2-5
Alpk3	3.994e-17	0.437742	0.99	0.893	6.28216e-13	1	Alpk3
Coa3	4.02498e-17	0.317193	1	0.999	6.33089e-13	1	Coa3
Nexn	4.59557e-17	0.303513	1	0.998	7.22837e-13	1	Nexn
Tufm	4.68474e-17	0.309127	1	1	7.36862e-13	1	Tufm
Pfkm	4.95347e-17	0.304484	1	0.995	7.79132e-13	1	Pfkm
Etfa1	5.08924e-17	0.302281	1	1	8.00487e-13	1	Etfa
Timm8b	5.16144e-17	0.262677	1	1	8.11843e-13	1	Timm8b
Mtch2	5.42167e-17	0.281792	1	0.999	8.52774e-13	1	Mtch2
Polr2l	5.5206e-17	0.259342	1	1	8.68336e-13	1	Polr2l
Slmo2	5.70994e-17	0.362782	1	0.98	8.98117e-13	1	Slmo2
Suclg1	7.07351e-17	0.270201	1	1	1.11259e-12	1	Suclg1
Lmod3	7.21939e-17	0.407679	0.97	0.703	1.13554e-12	1	Lmod3
Cdh21	7.32374e-17	0.331129	1	0.979	1.15195e-12	1	Cdh2
Ndufa9	7.63145e-17	0.301813	1	0.999	1.20035e-12	1	Ndufa9
Ryr2	8.70913e-17	0.340723	1	0.988	1.36986e-12	1	Ryr2
Hk1	9.31352e-17	0.296138	1	0.994	1.46492e-12	1	Hk1
Pcbd1	9.37556e-17	0.415734	0.97	0.716	1.47468e-12	1	Pcbd1
Mcee	1.04434e-16	0.314304	1	0.997	1.64264e-12	1	Mcee
Ppip5k21	1.1685e-16	0.436469	0.97	0.893	1.83793e-12	1	Ppip5k2
Aco2	1.34026e-16	0.251137	1	1	2.10809e-12	1	Aco2
Fhl21	1.35893e-16	0.363241	1	1	2.13747e-12	1	Fhl2
Mrpl15	1.55026e-16	0.32373	1	0.995	2.4384e-12	1	Mrpl15
Macrod1	2.04653e-16	0.392427	0.99	0.936	3.21899e-12	1	Macrod1
Ehd4	2.78941e-16	0.289255	1	0.996	4.38746e-12	1	Ehd4
Kcnj4	3.27406e-16	0.314133	0.45	0.141	5.14977e-12	1	Kcnj4
Gja11	3.2866e-16	0.351003	1	0.996	5.16949e-12	1	Gja1
Prkaca	3.46976e-16	0.264329	1	0.999	5.45759e-12	1	Prkaca
2022-09-06	4.38708e-16	0.385066	0.99	0.875	6.90044e-12	1	2022-09-06
Esrra	5.05666e-16	0.365071	1	0.977	7.95363e-12	1	Esrra
Efnb31	5.24757e-16	0.430105	0.96	0.741	8.2539e-12	1	Efnb3
Hint2	7.49141e-16	0.349691	1	0.972	1.17832e-11	1	Hint2
Alpk2	7.62545e-16	0.393019	0.99	0.844	1.19941e-11	1	Alpk2
Doc2g	7.62983e-16	0.371793	1	0.956	1.2001e-11	1	Doc2g
Myom1	8.07947e-16	0.271808	1	0.999	1.27082e-11	1	Myom1
Grpel1	8.13098e-16	0.277847	1	0.999	1.27892e-11	1	Grpel1
Fxn	8.90793e-16	0.377675	0.99	0.893	1.40113e-11	1	Fxn
Timm17a	9.56267e-16	0.3001	1	0.998	1.50411e-11	1	Timm17a
Tln2	1.00365e-15	0.37453	1	0.947	1.57864e-11	1	Tln2
Fam96b	1.11853e-15	0.283745	1	1	1.75933e-11	1	Fam96b
Dnajc19	1.16182e-15	0.310095	1	0.996	1.82742e-11	1	Dnajc19
Myoz2	1.21637e-15	0.311175	1	0.99	1.91323e-11	1	Myoz2
Mtx2	1.29832e-15	0.320263	1	0.993	2.04213e-11	1	Mtx2
Idh3g1	1.42217e-15	0.251257	1	1	2.23693e-11	1	Idh3g
Prep	1.62523e-15	0.358612	0.98	0.879	2.55633e-11	1	Prep
Fuom	1.75112e-15	0.314154	1	0.992	2.75434e-11	1	Fuom
Aldh1b11	1.96369e-15	0.364202	1	0.985	3.08869e-11	1	Aldh1b1
Etfdh	2e-15	0.333202	1	0.992	3.1458e-11	1	Etfdh
Glrx5	2.09007e-15	0.292578	1	0.999	3.28748e-11	1	Glrx5
Srl	2.23383e-15	0.3104	1	0.997	3.51359e-11	1	Srl
Adhfe1	2.97534e-15	0.368822	0.78	0.392	4.67991e-11	1	Adhfe1
Lpar31	3.80753e-15	0.417038	0.94	0.593	5.98887e-11	1	Lpar3
Ndufaf4	3.85173e-15	0.342371	1	0.95	6.05839e-11	1	Ndufaf4
Coq9	3.99371e-15	0.288672	1	0.995	6.28171e-11	1	Coq9
Apoo	4.8805e-15	0.328639	1	0.986	7.67655e-11	1	Apoo
Nudt19	6.31441e-15	0.372789	1	0.925	9.93194e-11	1	Nudt19
Stmn1	8.49886e-15	0.299147	1	1	1.33678e-10	1	Stmn1
1110007C09Rik	8.69783e-15	0.313136	0.99	0.988	1.36808e-10	1	1110007C09Rik
Mrpl55	8.78635e-15	0.31172	1	0.98	1.38201e-10	1	Mrpl55
Pmpcb	8.90981e-15	0.279619	1	0.998	1.40142e-10	1	Pmpcb
Upp1	8.9593e-15	0.407544	0.9	0.566	1.40921e-10	1	Upp1
Mrpl54	1.0225e-14	0.255163	1	0.999	1.6083e-10	1	Mrpl54
Rnf207	1.03573e-14	0.344793	1	0.971	1.62909e-10	1	Rnf207
Dld	1.35883e-14	0.297947	1	0.999	2.1373e-10	1	Dld
Ldb3	1.44083e-14	0.266292	1	1	2.26628e-10	1	Ldb3
Dcp1b	1.59225e-14	0.359297	0.87	0.481	2.50445e-10	1	Dcp1b
Suclg21	1.65339e-14	0.31884	1	0.981	2.60061e-10	1	Suclg2
Chchd3	1.73971e-14	0.30527	1	0.995	2.73639e-10	1	Chchd3
Cacna1c1	2.26406e-14	0.353943	0.99	0.957	3.56115e-10	1	Cacna1c
Mrps33	2.935e-14	0.256767	1	1	4.61646e-10	1	Mrps33
Clybl	2.97496e-14	0.362484	0.95	0.83	4.67932e-10	1	Clybl
Hey21	3.49618e-14	0.400437	0.96	0.837	5.49914e-10	1	Hey2
Tfrc	3.55421e-14	0.34733	1	0.964	5.59042e-10	1	Tfrc
Slc25a12	4.40546e-14	0.332786	1	0.971	6.92936e-10	1	Slc25a12
Snrpd1	5.34794e-14	0.251405	1	1	8.41177e-10	1	Snrpd1
Eef1a2	5.36136e-14	0.297849	1	0.987	8.43289e-10	1	Eef1a2
Mrps35	5.5454e-14	0.31671	1	0.98	8.72236e-10	1	Mrps35
Tuba4a	5.62835e-14	0.352414	0.95	0.759	8.85283e-10	1	Tuba4a
Lrrc10	6.9352e-14	0.393631	0.97	0.854	1.09084e-09	1	Lrrc10
Gfm1	7.76094e-14	0.373848	1	0.956	1.22072e-09	1	Gfm1
Itgb1bp2	7.88969e-14	0.285201	1	0.98	1.24097e-09	1	Itgb1bp2
Gmpr	8.32726e-14	0.332249	1	0.976	1.3098e-09	1	Gmpr
Trap1	8.43727e-14	0.307095	1	0.992	1.3271e-09	1	Trap1
Prelid2	9.10366e-14	0.391863	0.93	0.687	1.43192e-09	1	Prelid2
Gpr68	9.55525e-14	0.297179	0.48	0.175	1.50294e-09	1	Gpr68
Tesc	1.07649e-13	0.416083	0.94	0.749	1.69321e-09	1	Tesc
Slc25a131	1.1331e-13	0.398933	0.93	0.661	1.78225e-09	1	Slc25a13
Rapsn	1.21456e-13	0.446535	0.88	0.605	1.91039e-09	1	Rapsn
Dlat	1.2966e-13	0.298234	1	0.995	2.03943e-09	1	Dlat
Stk39	1.36544e-13	0.329654	1	0.975	2.1477e-09	1	Stk39
Lsm4	1.45245e-13	0.251506	1	1	2.28456e-09	1	Lsm4
Mlip	1.55143e-13	0.325268	0.99	0.955	2.44024e-09	1	Mlip
Casz1	1.68697e-13	0.372085	0.94	0.796	2.65344e-09	1	Casz1
Perp	1.69546e-13	0.306426	1	0.985	2.66679e-09	1	Perp
Hddc2	1.72421e-13	0.391245	0.92	0.581	2.71201e-09	1	Hddc2
Clasp11	1.73976e-13	0.332911	1	0.981	2.73647e-09	1	Clasp1
Adprhl1	1.84784e-13	0.305829	1	0.989	2.90647e-09	1	Adprhl1
Kcnip21	1.92294e-13	0.388717	0.91	0.624	3.02459e-09	1	Kcnip2
Mrps15	2.22162e-13	0.284285	1	0.995	3.49438e-09	1	Mrps15
Oxa1l	2.24201e-13	0.26777	1	0.998	3.52646e-09	1	Oxa1l
Adk	2.3244e-13	0.341486	1	0.965	3.65605e-09	1	Adk
Mrpl45	2.66138e-13	0.358024	0.98	0.898	4.18609e-09	1	Mrpl45
Kcnh2	2.8412e-13	0.334474	0.99	0.956	4.46892e-09	1	Kcnh2
Pxmp2	2.90049e-13	0.342253	0.9	0.575	4.56219e-09	1	Pxmp2
Bckdhb	2.90553e-13	0.333307	1	0.949	4.57011e-09	1	Bckdhb
Tnfrsf12a	3.24884e-13	0.314953	1	0.991	5.11011e-09	1	Tnfrsf12a
Smim5	4.09391e-13	0.342795	0.97	0.877	6.43932e-09	1	Smim5
Avpi1	4.17265e-13	0.314344	0.99	0.956	6.56316e-09	1	Avpi1
Hibadh	4.41634e-13	0.294475	1	0.993	6.94647e-09	1	Hibadh
Smyd1	4.45934e-13	0.294136	1	0.986	7.0141e-09	1	Smyd1
Timm23	4.64845e-13	0.251259	1	1	7.31155e-09	1	Timm23
Lrrc1	4.99715e-13	0.39657	0.93	0.693	7.86002e-09	1	Lrrc1
Mrps27	5.2194e-13	0.326846	0.97	0.904	8.2096e-09	1	Mrps27
D10Jhu81e	5.84858e-13	0.282966	1	0.996	9.19923e-09	1	D10Jhu81e
Slc25a39	5.92559e-13	0.255446	1	1	9.32035e-09	1	Slc25a39
9630028I04Rik	6.42333e-13	0.339474	0.63	0.297	1.01032e-08	1	9630028I04Rik
Gmnn	8.03628e-13	0.349764	1	0.941	1.26403e-08	1	Gmnn
Cdkn2d	8.36279e-13	0.346274	0.98	0.968	1.31538e-08	1	Cdkn2d
Ptgr2	8.79898e-13	0.352874	1	0.973	1.38399e-08	1	Ptgr2
Ptges2	9.43256e-13	0.337861	0.97	0.907	1.48365e-08	1	Ptges2
Kcnq11	9.71569e-13	0.391139	0.9	0.711	1.52818e-08	1	Kcnq1
Stard71	1.18797e-12	0.297324	1	0.992	1.86857e-08	1	Stard7
Ak1	1.22928e-12	0.251353	1	1	1.93353e-08	1	Ak1
Naa20	1.41002e-12	0.301693	1	0.993	2.21782e-08	1	Naa20
4930452B06Rik	1.41198e-12	0.337664	0.69	0.369	2.22091e-08	1	4930452B06Rik
Slc25a33	1.82294e-12	0.313811	0.64	0.308	2.86731e-08	1	Slc25a33
Rangrf	1.82458e-12	0.33085	0.98	0.922	2.86988e-08	1	Rangrf
Xirp1	1.82789e-12	0.294323	1	0.982	2.87508e-08	1	Xirp1
3425401B19Rik	1.88485e-12	0.345632	0.84	0.497	2.96468e-08	1	3425401B19Rik
Lrrfip1	1.93801e-12	0.273322	1	0.996	3.0483e-08	1	Lrrfip1
C430049B03Rik	2.09147e-12	0.267052	1	0.998	3.28968e-08	1	C430049B03Rik
Pdhx	2.18322e-12	0.319539	0.97	0.934	3.43399e-08	1	Pdhx
Slc25a19	2.47659e-12	0.386315	0.92	0.789	3.89542e-08	1	Slc25a19
Nol3	2.7345e-12	0.352974	0.73	0.416	4.30109e-08	1	Nol3
Rcan1	3.04751e-12	0.304132	1	0.979	4.79343e-08	1	Rcan1
Mlf1	3.11028e-12	0.266924	1	0.999	4.89217e-08	1	Mlf1
Pdk11	3.2577e-12	0.274424	1	0.996	5.12403e-08	1	Pdk1
Ctnna3	3.36266e-12	0.35569	0.68	0.358	5.28912e-08	1	Ctnna3
Osbpl81	3.43583e-12	0.329259	0.98	0.925	5.40422e-08	1	Osbpl8
Pde1c	4.67182e-12	0.347953	0.81	0.489	7.34831e-08	1	Pde1c
Gm16793	5.22167e-12	0.300779	0.51	0.212	8.21316e-08	1	Gm16793
Coq10a	5.23875e-12	0.321686	0.96	0.674	8.24002e-08	1	Coq10a
Rab3ip	6.93423e-12	0.313142	0.99	0.931	1.09069e-07	1	Rab3ip
Gm561	7.07758e-12	0.299168	1	0.982	1.11323e-07	1	Gm561
Bag2	8.52354e-12	0.339255	0.99	0.921	1.34067e-07	1	Bag2
Trim631	1.03626e-11	0.290626	1	0.973	1.62993e-07	1	Trim63
Tomm40l	1.09761e-11	0.303021	0.98	0.937	1.72644e-07	1	Tomm40l
Emc2	1.18778e-11	0.266188	1	0.993	1.86826e-07	1	Emc2
Mov10l1	1.20239e-11	0.319635	0.97	0.778	1.89124e-07	1	Mov10l1
Lamc2	1.22225e-11	0.328468	0.73	0.415	1.92248e-07	1	Lamc2
Aifm1	1.22285e-11	0.284468	1	0.988	1.92343e-07	1	Aifm1
Mrrf	1.25444e-11	0.328105	0.94	0.854	1.97311e-07	1	Mrrf
Hspb2	1.37998e-11	0.262543	1	0.995	2.17057e-07	1	Hspb2
Ppa2	1.4064e-11	0.31564	1	0.958	2.21213e-07	1	Ppa2
2300009A05Rik	1.49593e-11	0.297811	1	0.979	2.35295e-07	1	2300009A05Rik
Ube2t	1.53284e-11	0.332752	0.83	0.511	2.411e-07	1	Ube2t
Obscn	1.62629e-11	0.264483	1	0.999	2.55799e-07	1	Obscn
Timm8a1	1.63027e-11	0.270948	1	0.944	2.56426e-07	1	Timm8a1
Chchd4	1.6832e-11	0.319002	0.98	0.887	2.6475e-07	1	Chchd4
Pdxp	1.70016e-11	0.348567	0.93	0.677	2.67418e-07	1	Pdxp
Ccdc69	1.71875e-11	0.330194	0.82	0.497	2.70342e-07	1	Ccdc69
Tbrg4	1.75731e-11	0.317163	0.97	0.912	2.76407e-07	1	Tbrg4
Lsm2	1.78275e-11	0.28871	1	0.982	2.80408e-07	1	Lsm2
Gm38431	1.78825e-11	0.287528	0.6	0.29	2.81274e-07	1	Gm38431
Alas1	1.81431e-11	0.286075	1	0.98	2.85373e-07	1	Alas1
Ky	1.84134e-11	0.300306	0.63	0.312	2.89624e-07	1	Ky
Dll4	1.85145e-11	0.301631	0.81	0.455	2.91214e-07	1	Dll4
Dnaja3	1.87323e-11	0.321458	0.98	0.938	2.9464e-07	1	Dnaja3
Bex4	1.95288e-11	0.27407	1	0.977	3.07169e-07	1	Bex4
1190007I07Rik	2.03892e-11	0.308796	0.89	0.554	3.20702e-07	1	1190007I07Rik
Dennd6b	2.14363e-11	0.310163	0.83	0.496	3.37172e-07	1	Dennd6b
Bmp7	2.22085e-11	0.333386	0.97	0.887	3.49318e-07	1	Bmp7
Pttg1	2.34362e-11	0.265751	1	0.992	3.68628e-07	1	Pttg1
Pin4	2.52478e-11	0.278207	0.99	0.946	3.97122e-07	1	Pin4
Mfn1	2.58554e-11	0.273886	1	0.969	4.06679e-07	1	Mfn1
Timm44	2.5997e-11	0.272409	0.99	0.988	4.08907e-07	1	Timm44
Coq61	2.64099e-11	0.306266	0.99	0.944	4.15401e-07	1	Coq6
Rnf128	2.7182e-11	0.321593	0.91	0.623	4.27545e-07	1	Rnf128
Smim20	2.82199e-11	0.271824	0.99	0.987	4.4387e-07	1	Smim20
Atad3a	3.42914e-11	0.288209	1	0.978	5.39369e-07	1	Atad3a
Aldh5a1	3.45986e-11	0.338028	0.95	0.858	5.44202e-07	1	Aldh5a1
Qrsl1	3.70799e-11	0.317696	0.92	0.616	5.8323e-07	1	Qrsl1
Grik3	3.72862e-11	0.288004	0.43	0.172	5.86475e-07	1	Grik3
Unc45b	3.74271e-11	0.281011	1	0.988	5.88691e-07	1	Unc45b
Afg3l2	3.89798e-11	0.261882	1	0.983	6.13114e-07	1	Afg3l2
Opa1	3.95364e-11	0.279547	0.99	0.943	6.21868e-07	1	Opa1
Ppp1r3c	4.16096e-11	0.272181	1	0.992	6.54477e-07	1	Ppp1r3c
Fahd1	4.38531e-11	0.32378	0.96	0.808	6.89766e-07	1	Fahd1
Fam210a	4.55135e-11	0.282498	0.99	0.874	7.15882e-07	1	Fam210a
Slc6a8	4.63571e-11	0.296012	0.99	0.907	7.29151e-07	1	Slc6a8
Pdss1	4.80742e-11	0.377985	0.87	0.611	7.56159e-07	1	Pdss1
Dctpp1	4.88142e-11	0.266095	0.99	0.992	7.67799e-07	1	Dctpp1
Apool	5.12796e-11	0.338983	0.97	0.791	8.06577e-07	1	Apool
Cited4	5.55394e-11	0.332213	0.96	0.832	8.73579e-07	1	Cited4
Cdip1	5.66755e-11	0.273558	1	0.988	8.91449e-07	1	Cdip1
Inpp5a	5.69306e-11	0.250726	1	0.994	8.95461e-07	1	Inpp5a
Pcgf5	5.76226e-11	0.350511	0.91	0.657	9.06346e-07	1	Pcgf5
Snta1	5.83702e-11	0.275802	1	0.968	9.18105e-07	1	Snta1
Gm3646	6.55983e-11	0.326436	0.7	0.378	1.0318e-06	1	Gm3646
Adsl	6.59618e-11	0.298166	1	0.95	1.03751e-06	1	Adsl
Tmod1	6.65208e-11	0.255185	1	0.997	1.04631e-06	1	Tmod1
Kcng2	6.95821e-11	0.270169	1	0.982	1.09446e-06	1	Kcng2
Epn3	8.5604e-11	0.310342	0.86	0.517	1.34647e-06	1	Epn3
Tomm22	8.92179e-11	0.258683	1	0.997	1.40331e-06	1	Tomm22
Fyco1	9.58706e-11	0.279284	0.98	0.946	1.50795e-06	1	Fyco1
Mpi	9.86279e-11	0.283875	0.99	0.916	1.55132e-06	1	Mpi
Prkaa2	1.02789e-10	0.279876	1	0.959	1.61678e-06	1	Prkaa2
Mettl22	1.05189e-10	0.319756	0.88	0.606	1.65451e-06	1	Mettl22
Adssl11	1.09441e-10	0.285499	0.99	0.958	1.72139e-06	1	Adssl1
Slc30a9	1.11667e-10	0.251523	0.99	0.972	1.7564e-06	1	Slc30a9
Fsd21	1.15212e-10	0.319962	1	0.946	1.81216e-06	1	Fsd2
Mt2	1.17523e-10	0.278889	0.98	0.818	1.84851e-06	1	Mt2
Slc12a7	1.18e-10	0.304901	0.98	0.921	1.85602e-06	1	Slc12a7
Pcyt2	1.21141e-10	0.300899	0.98	0.944	1.90543e-06	1	Pcyt2
Mrpl36	1.26583e-10	0.260132	1	0.992	1.99103e-06	1	Mrpl36
Tmem11	1.27878e-10	0.273988	0.99	0.947	2.0114e-06	1	Tmem11
Perm1	1.32026e-10	0.345746	0.92	0.616	2.07664e-06	1	Perm1
Mrpl38	1.50822e-10	0.26821	1	0.953	2.37228e-06	1	Mrpl38
Fibp	1.51685e-10	0.271392	0.99	0.951	2.38586e-06	1	Fibp
Psmg4	1.65664e-10	0.279181	1	0.986	2.60573e-06	1	Psmg4
Lppr1	1.87972e-10	0.356693	0.72	0.445	2.95662e-06	1	Lppr1
Mrpl16	2.02273e-10	0.311923	0.95	0.866	3.18155e-06	1	Mrpl16
Hccs	2.13787e-10	0.288055	0.96	0.781	3.36266e-06	1	Hccs
Rcor2	2.21366e-10	0.315912	0.91	0.59	3.48187e-06	1	Rcor2
Pdk21	2.33336e-10	0.281619	1	0.983	3.67014e-06	1	Pdk2
Dusp27	2.41022e-10	0.297768	0.97	0.815	3.79104e-06	1	Dusp27
1810044D09Rik	2.42544e-10	0.275424	0.51	0.237	3.81497e-06	1	1810044D09Rik
Mrps34	2.61577e-10	0.295879	0.99	0.977	4.11435e-06	1	Mrps34
Akap1	2.62094e-10	0.275738	0.99	0.956	4.12247e-06	1	Akap1
Fdx1	2.86648e-10	0.268673	1	0.977	4.50868e-06	1	Fdx1
2500002B13Rik	2.90368e-10	0.306527	0.8	0.478	4.5672e-06	1	2500002B13Rik
Nbeal2	3.04785e-10	0.290708	0.74	0.422	4.79396e-06	1	Nbeal2
Scrn2	3.55468e-10	0.276333	0.64	0.335	5.59115e-06	1	Scrn2
Timmdc1	3.56509e-10	0.28603	0.97	0.924	5.60753e-06	1	Timmdc1
Tmem126a	3.62089e-10	0.277603	0.98	0.977	5.69529e-06	1	Tmem126a
Ankrd24	3.71481e-10	0.308023	0.88	0.639	5.84302e-06	1	Ankrd24
Klhl30	3.76069e-10	0.300657	0.98	0.877	5.91519e-06	1	Klhl30
Syngr1	3.94625e-10	0.294847	0.98	0.806	6.20705e-06	1	Syngr1
Srpk3	4.02916e-10	0.336403	0.93	0.864	6.33747e-06	1	Srpk3
Usp2	4.13255e-10	0.29564	0.96	0.873	6.50008e-06	1	Usp2
Alkbh7	4.267e-10	0.291282	0.99	0.925	6.71157e-06	1	Alkbh7
Usp13	4.28661e-10	0.317576	0.85	0.606	6.74241e-06	1	Usp13
Frmd5	5.08477e-10	0.266942	0.86	0.512	7.99784e-06	1	Frmd5
2310061I04Rik	5.303e-10	0.281573	0.96	0.874	8.34108e-06	1	2310061I04Rik
Gtf2b	5.82041e-10	0.322761	0.93	0.864	9.15493e-06	1	Gtf2b
Mycn	5.83668e-10	0.305073	0.69	0.405	9.18052e-06	1	Mycn
Kbtbd12	6.0102e-10	0.283674	0.73	0.438	9.45345e-06	1	Kbtbd12
Lrrc14b	6.11926e-10	0.340793	0.86	0.585	9.62498e-06	1	Lrrc14b
LOC102636514	6.22159e-10	0.320273	0.93	0.663	9.78594e-06	1	LOC102636514
Msto1	6.31305e-10	0.311881	0.91	0.69	9.9298e-06	1	Msto1
Iba57	6.64331e-10	0.277508	0.64	0.348	1.04493e-05	1	Iba57
Dnph1	6.82886e-10	0.281383	0.74	0.438	1.07411e-05	1	Dnph1
Nfatc2	7.18796e-10	0.3257	0.85	0.568	1.13059e-05	1	Nfatc2
Fignl1	7.69608e-10	0.332756	0.88	0.66	1.21052e-05	1	Fignl1
Yars2	8.39031e-10	0.344377	0.93	0.783	1.31971e-05	1	Yars2
Ivd	8.50656e-10	0.258695	1	0.968	1.338e-05	1	Ivd
Sap30	8.51689e-10	0.306884	0.97	0.808	1.33962e-05	1	Sap30
Kxd1	9.47483e-10	0.260859	0.97	0.958	1.4903e-05	1	Kxd1
Insc	9.60795e-10	0.272387	0.6	0.309	1.51123e-05	1	Insc
Popdc3	9.60796e-10	0.331052	0.92	0.658	1.51124e-05	1	Popdc3
Myo18a	1.05184e-09	0.258947	1	0.978	1.65444e-05	1	Myo18a
Mrps9	1.12313e-09	0.260193	1	0.983	1.76657e-05	1	Mrps9
Rrm2	1.19681e-09	0.263241	1	0.986	1.88246e-05	1	Rrm2
1700020I14Rik	1.26183e-09	0.329887	0.94	0.815	1.98473e-05	1	1700020I14Rik
BC003965	1.26854e-09	0.250454	0.99	0.909	1.99529e-05	1	BC003965
Ddx39	1.3132e-09	0.259027	0.99	0.954	2.06554e-05	1	Ddx39
Shmt2	1.32688e-09	0.267638	0.99	0.976	2.08705e-05	1	Shmt2
Lsmem1	1.36932e-09	0.290775	0.68	0.394	2.1538e-05	1	Lsmem1
Camk2a	1.49128e-09	0.338654	0.9	0.659	2.34563e-05	1	Camk2a
1700007L15Rik	1.53891e-09	0.250098	0.49	0.229	2.42055e-05	1	1700007L15Rik
Rtn4ip1	1.54143e-09	0.323885	0.85	0.649	2.42452e-05	1	Rtn4ip1
Micall1	1.57542e-09	0.258703	0.98	0.942	2.47797e-05	1	Micall1
Rhot2	1.65489e-09	0.28886	0.97	0.828	2.60297e-05	1	Rhot2
Asb10	1.82823e-09	0.273289	0.56	0.287	2.87562e-05	1	Asb10
Hbegf	1.84658e-09	0.264806	0.7	0.412	2.90449e-05	1	Hbegf
Vegfa	1.85767e-09	0.258346	1	0.981	2.92192e-05	1	Vegfa
Mmp15	1.87162e-09	0.271468	0.99	0.962	2.94387e-05	1	Mmp15
Atp5s	1.88781e-09	0.292927	0.75	0.471	2.96933e-05	1	Atp5s
Gpsm1	1.96623e-09	0.25154	1	0.972	3.09269e-05	1	Gpsm1
Phldb2	1.98494e-09	0.284501	0.98	0.891	3.12211e-05	1	Phldb2
Akr1b10	2.07075e-09	0.311799	0.88	0.748	3.25709e-05	1	Akr1b10
Mrpl19	2.17986e-09	0.299446	0.94	0.837	3.42871e-05	1	Mrpl19
Ndufaf6	2.2756e-09	0.29959	0.92	0.658	3.57929e-05	1	Ndufaf6
Ccdc58	2.30348e-09	0.265477	0.99	0.961	3.62314e-05	1	Ccdc58
Fam189a2	2.35232e-09	0.274168	0.97	0.913	3.69997e-05	1	Fam189a2
Cdc37l1	2.46693e-09	0.272998	0.96	0.839	3.88024e-05	1	Cdc37l1
Tceal5	2.5522e-09	0.338359	0.87	0.695	4.01436e-05	1	Tceal5
Efcab2	2.55566e-09	0.300481	0.67	0.387	4.0198e-05	1	Efcab2
Psmc3ip	2.57341e-09	0.251586	0.82	0.523	4.04771e-05	1	Psmc3ip
Nudt8	3.14196e-09	0.261896	0.97	0.913	4.94198e-05	1	Nudt8
Mrpl40	3.43633e-09	0.272047	1	0.968	5.40501e-05	1	Mrpl40
Ak2	3.78342e-09	0.251223	1	0.982	5.95094e-05	1	Ak2
Slc26a10	3.86226e-09	0.304068	0.65	0.378	6.07496e-05	1	Slc26a10
Grhpr	3.90752e-09	0.29821	0.94	0.831	6.14614e-05	1	Grhpr
Nt5dc3	3.94056e-09	0.313846	0.9	0.682	6.1981e-05	1	Nt5dc3
Slc4a3	4.03977e-09	0.270066	0.97	0.932	6.35415e-05	1	Slc4a3
Cenpv	4.1166e-09	0.26494	0.95	0.691	6.475e-05	1	Cenpv
Aldoc	4.3361e-09	0.265619	0.82	0.512	6.82025e-05	1	Aldoc
Acacb	4.56995e-09	0.263426	0.98	0.834	7.18808e-05	1	Acacb
Arvcf	4.57363e-09	0.323883	0.92	0.719	7.19386e-05	1	Arvcf
Cdh16	4.77693e-09	0.315254	0.8	0.505	7.51363e-05	1	Cdh16
Timm9	5.25919e-09	0.271988	0.98	0.958	8.27218e-05	1	Timm9
Ppp1r1a	5.34503e-09	0.27406	0.99	0.936	8.40719e-05	1	Ppp1r1a
Lyrm9	5.82925e-09	0.259037	0.99	0.855	9.16883e-05	1	Lyrm9
Murc	5.86519e-09	0.327616	0.89	0.631	9.22535e-05	1	Murc
Inpp5j	6.04315e-09	0.271357	0.78	0.479	9.50526e-05	1	Inpp5j
Ndufs5	6.3063e-09	0.291333	0.92	0.775	9.91919e-05	1	Ndufs5
2810025M15Rik	7.21564e-09	0.260358	0.97	0.974	0.000113495	1	2810025M15Rik
Slc16a3	7.34493e-09	0.283279	0.98	0.902	0.000115528	1	Slc16a3
Polr1e	7.60231e-09	0.29647	0.94	0.825	0.000119577	1	Polr1e
Atpaf1	7.81244e-09	0.31766	0.95	0.832	0.000122882	1	Atpaf1
Osbpl1a	8.06631e-09	0.291981	0.94	0.841	0.000126875	1	Osbpl1a
Tsfm	8.15741e-09	0.296325	1	0.934	0.000128308	1	Tsfm
Coq3	8.71224e-09	0.297955	0.87	0.564	0.000137035	1	Coq3
Fgf1	8.81123e-09	0.25651	0.69	0.395	0.000138592	1	Fgf1
Scly	9.24033e-09	0.269762	0.69	0.419	0.000145341	1	Scly
Haus8	9.3572e-09	0.261233	0.95	0.866	0.000147179	1	Haus8
Larp1b	9.45275e-09	0.25878	0.81	0.51	0.000148682	1	Larp1b
Rftn1	9.66916e-09	0.257157	0.79	0.488	0.000152086	1	Rftn1
Cpeb3	9.79769e-09	0.275016	0.68	0.395	0.000154108	1	Cpeb3
Brd7	9.82479e-09	0.256653	1	0.947	0.000154534	1	Brd7
U2af1l4	1.0418e-08	0.272174	0.95	0.873	0.000163864	1	U2af1l4
Cbr4	1.05939e-08	0.282896	0.8	0.571	0.000166632	1	Cbr4
D630045M09Rik	1.08482e-08	0.269358	0.69	0.397	0.000170631	1	D630045M09Rik
Pank1	1.1521e-08	0.279918	0.92	0.783	0.000181213	1	Pank1
Ttc19	1.18613e-08	0.310296	0.72	0.476	0.000186566	1	Ttc19
Sdsl	1.26135e-08	0.284432	0.87	0.575	0.000198397	1	Sdsl
Psmb10	1.34232e-08	0.275322	0.99	0.902	0.000211133	1	Psmb10
Hsdl2	1.42514e-08	0.253956	0.99	0.934	0.00022416	1	Hsdl2
Ctps	1.43501e-08	0.257198	1	0.98	0.000225713	1	Ctps
Ccdc51	1.48329e-08	0.262866	0.63	0.366	0.000233306	1	Ccdc51
Igfbpl1	1.79378e-08	0.330533	0.65	0.419	0.000282143	1	Igfbpl1
Atp6v1b2	1.83537e-08	0.257389	0.98	0.973	0.000288685	1	Atp6v1b2
Mrpl21	1.94791e-08	0.311917	0.95	0.835	0.000306387	1	Mrpl21
Spryd4	1.99194e-08	0.283359	0.92	0.686	0.000313312	1	Spryd4
Abca2	2.04385e-08	0.286011	0.83	0.555	0.000321478	1	Abca2
Fam73b	2.04414e-08	0.275866	0.95	0.855	0.000321522	1	Fam73b
Car14	2.19511e-08	0.27994	0.93	0.798	0.00034527	1	Car14
Fam213b	2.2285e-08	0.28216	0.82	0.587	0.000350521	1	Fam213b
Homer2	2.24815e-08	0.293494	0.9	0.66	0.000353611	1	Homer2
Glcci1	2.42619e-08	0.269426	0.74	0.465	0.000381616	1	Glcci1
Slc29a2	2.4431e-08	0.308056	0.81	0.567	0.000384275	1	Slc29a2
Hagh	2.59886e-08	0.278836	0.99	0.864	0.000408774	1	Hagh
Dip2c	2.82351e-08	0.267292	0.92	0.751	0.000444111	1	Dip2c
Emc9	2.99802e-08	0.266304	0.76	0.498	0.000471558	1	Emc9
Lhpp	3.05876e-08	0.274624	0.87	0.608	0.000481113	1	Lhpp
Rbp71	3.20211e-08	0.327687	0.92	0.712	0.00050366	1	Rbp7
Msra	3.69842e-08	0.279007	0.92	0.752	0.000581725	1	Msra
Hsf2	3.77716e-08	0.270374	0.76	0.495	0.00059411	1	Hsf2
1700120C14Rik	3.92465e-08	0.291506	0.87	0.577	0.000617308	1	1700120C14Rik
Letm1	4.03385e-08	0.283674	0.99	0.941	0.000634484	1	Letm1
Supv3l1	4.5526e-08	0.295839	0.85	0.676	0.000716078	1	Supv3l1
Ptcd3	4.88811e-08	0.260152	1	0.959	0.00076885	1	Ptcd3
Lace1	4.94527e-08	0.279922	0.82	0.575	0.000777841	1	Lace1
Slc2a4	5.32283e-08	0.266158	0.98	0.912	0.000837227	1	Slc2a4
Malt1	5.46946e-08	0.258315	0.58	0.325	0.000860291	1	Malt1
Asb8	5.85652e-08	0.26207	0.97	0.885	0.000921173	1	Asb8
Mylk3	5.90324e-08	0.257372	0.99	0.819	0.00092852	1	Mylk3
Tarsl2	6.08386e-08	0.262098	0.79	0.538	0.000956931	1	Tarsl2
Hspb3	6.14102e-08	0.267747	0.97	0.849	0.000965921	1	Hspb3
Dhrs11	6.85945e-08	0.276212	0.99	0.91	0.00107892	1	Dhrs11
Gyk	7.28372e-08	0.264879	0.8	0.56	0.00114566	1	Gyk
Pip5k1b	7.3383e-08	0.25661	0.76	0.474	0.00115424	1	Pip5k1b
8430408G22Rik1	7.54252e-08	0.310638	0.94	0.789	0.00118636	1	8430408G22Rik
Mrps22	7.95089e-08	0.267771	0.96	0.834	0.0012506	1	Mrps22
Arhgef39	8.36138e-08	0.277492	0.81	0.571	0.00131516	1	Arhgef39
Scmh1	8.40412e-08	0.261026	0.95	0.864	0.00132188	1	Scmh1
Uhrf1	8.45232e-08	0.270059	0.95	0.889	0.00132947	1	Uhrf1
Speg	8.52758e-08	0.250276	1	0.973	0.0013413	1	Speg
Bik	8.63729e-08	0.256275	0.89	0.639	0.00135856	1	Bik
Lrpprc	8.77485e-08	0.264815	0.96	0.937	0.0013802	1	Lrpprc
Rab11fip5	9.09301e-08	0.255173	0.97	0.944	0.00143024	1	Rab11fip5
Foxred1	1.0172e-07	0.256144	0.96	0.849	0.00159995	1	Foxred1
Vash2	1.03742e-07	0.25865	0.96	0.888	0.00163176	1	Vash2
Cep85	1.06588e-07	0.263389	0.78	0.548	0.00167653	1	Cep85
Aars2	1.08342e-07	0.258617	0.64	0.405	0.0017041	1	Aars2
Comtd1	1.1143e-07	0.283033	0.92	0.675	0.00175268	1	Comtd1
Ccbl1	1.38617e-07	0.272044	0.82	0.596	0.00218031	1	Ccbl1
Mrpl46	1.45037e-07	0.25821	0.94	0.859	0.00228129	1	Mrpl46
Ecsit	1.6137e-07	0.263823	0.96	0.852	0.00253819	1	Ecsit
Creb5	1.70267e-07	0.258538	0.44	0.219	0.00267812	1	Creb5
Sars2	1.71242e-07	0.27024	0.79	0.536	0.00269347	1	Sars2
Dgat2	1.78176e-07	0.274785	0.87	0.603	0.00280252	1	Dgat2
Ppm1e	1.81894e-07	0.285238	0.77	0.553	0.00286102	1	Ppm1e
Coprs	1.89015e-07	0.275642	0.92	0.693	0.00297301	1	Coprs
Cox11	1.97271e-07	0.250796	0.95	0.818	0.00310288	1	Cox11
Slc6a17	1.98241e-07	0.262296	0.62	0.377	0.00311813	1	Slc6a17
Cox10	2.17752e-07	0.269138	0.9	0.715	0.00342502	1	Cox10
Arhgap44	2.23671e-07	0.272624	0.84	0.627	0.00351812	1	Arhgap44
Dancr	2.25033e-07	0.251151	0.96	0.816	0.00353954	1	Dancr
Klhl31	2.4164e-07	0.256999	0.92	0.791	0.00380075	1	Klhl31
Ak4	2.45476e-07	0.255055	0.79	0.549	0.00386109	1	Ak4
Eml2	2.46157e-07	0.255128	0.84	0.572	0.0038718	1	Eml2
Endog	3.24672e-07	0.25946	0.93	0.854	0.00510676	1	Endog
Rragd	3.43222e-07	0.29569	0.88	0.742	0.00539854	1	Rragd
Pigq	3.54665e-07	0.258701	0.94	0.898	0.00557852	1	Pigq
Ralgps2	3.61279e-07	0.271626	0.89	0.738	0.00568256	1	Ralgps2
Me3	3.89041e-07	0.253074	0.51	0.284	0.00611923	1	Me3
Plekhh1	4.28414e-07	0.271611	0.6	0.357	0.00673852	1	Plekhh1
Usp20	4.73664e-07	0.259043	0.93	0.842	0.00745027	1	Usp20
Prkca	6.44539e-07	0.260206	0.89	0.672	0.010138	1	Prkca
Mina	7.83638e-07	0.260207	0.71	0.459	0.0123258	1	Mina
Gchfr	8.08192e-07	0.271056	0.79	0.542	0.012712	1	Gchfr
Acot2	8.84582e-07	0.264365	0.89	0.69	0.0139136	1	Acot2
Metap1d	9.0829e-07	0.275324	0.92	0.727	0.0142865	1	Metap1d
Gm15417	9.60567e-07	0.297404	0.81	0.639	0.0151088	1	Gm15417
L2hgdh	9.78011e-07	0.25887	0.69	0.464	0.0153831	1	L2hgdh
Pitpnm1	1.05144e-06	0.259264	0.84	0.589	0.016538	1	Pitpnm1
Ifrd1	2.15327e-06	0.26242	0.95	0.85	0.0338687	1	Ifrd1
Lmod2	2.22466e-06	0.261895	0.88	0.699	0.0349917	1	Lmod2
Fndc5	2.41881e-06	0.253751	0.86	0.651	0.0380455	1	Fndc5
Parvb	2.89075e-06	0.25191	0.95	0.845	0.0454685	1	Parvb
Peo1	3.0502e-06	0.250754	0.8	0.578	0.0479766	1	Peo1
Ppcs	7.00353e-06	0.253458	0.78	0.57	0.110159	1	Ppcs
Nsun4	9.08355e-06	0.261832	0.87	0.719	0.142875	1	Nsun4
Mto1	1.01941e-05	0.250884	0.76	0.593	0.160343	1	Mto1
Slc22a1	1.26262e-39	1.24702	0.986	0.439	1.98598e-35	2	Slc22a1
Angpt1	8.57523e-38	1.19343	0.973	0.459	1.3488e-33	2	Angpt1
Apela	6.23954e-36	0.495955	0.5	0.071	9.81417e-32	2	Apela
Tm4sf5	1.59988e-34	0.480803	0.486	0.069	2.51645e-30	2	Tm4sf5
Mybphl	4.41037e-33	1.08055	1	0.529	6.93708e-29	2	Mybphl
Myl7	1.37656e-31	1.32958	1	1	2.16519e-27	2	Myl7
Msln	2.75598e-31	1.13743	1	0.612	4.33488e-27	2	Msln
Fgf12	6.94059e-31	0.917493	0.973	0.447	1.09169e-26	2	Fgf12
Myl4	2.99315e-30	1.01868	1	1	4.70793e-26	2	Myl4
Upk3b	4.57859e-28	0.702269	0.568	0.127	7.20167e-24	2	Upk3b
Myh6	1.40721e-27	0.57337	1	1	2.2134e-23	2	Myh6
Gpx3	1.41993e-26	0.787495	1	1	2.2334e-22	2	Gpx3
Stard10	3.45016e-26	0.827132	1	0.758	5.42676e-22	2	Stard10
Pkhd1l1	3.61889e-26	0.488348	0.5	0.099	5.69216e-22	2	Pkhd1l1
Nppa	4.50494e-26	0.553268	1	1	7.08583e-22	2	Nppa
Sln	6.3337e-26	0.94611	1	1	9.96227e-22	2	Sln
C3	1.0791e-25	1.12282	0.959	0.64	1.69732e-21	2	C3
Tnnt1	1.67505e-25	0.793265	1	0.972	2.63468e-21	2	Tnnt1
Efemp1	3.42393e-25	0.90024	0.919	0.478	5.38549e-21	2	Efemp1
Tmem163	4.4575e-25	0.7377	0.851	0.328	7.01121e-21	2	Tmem163
Gja5	5.52235e-25	0.801163	0.973	0.683	8.68611e-21	2	Gja5
Rps28	8.29866e-25	0.35162	1	1	1.3053e-20	2	Rps28
Nkain4	1.02239e-24	0.81811	0.905	0.45	1.60812e-20	2	Nkain4
Spon2	1.47267e-24	0.780952	1	0.846	2.31636e-20	2	Spon2
Rpl39	2.00803e-24	0.304346	1	1	3.15842e-20	2	Rpl39
Rplp1	2.9342e-24	0.282617	1	1	4.6152e-20	2	Rplp1
Rspo1	4.25174e-24	0.49035	0.554	0.132	6.68756e-20	2	Rspo1
Slc39a8	6.39716e-24	0.667254	0.784	0.287	1.00621e-19	2	Slc39a8
Mdk	7.28651e-24	0.607191	1	0.995	1.1461e-19	2	Mdk
Rps2	1.50414e-23	0.270646	1	1	2.36587e-19	2	Rps2
Ybx1	1.58116e-23	0.398374	1	1	2.487e-19	2	Ybx1
Rpl32	2.94124e-23	0.297444	1	1	4.62627e-19	2	Rpl32
Rps19	3.59108e-23	0.331501	1	1	5.64841e-19	2	Rps19
Rpl17	2.72082e-22	0.304675	1	1	4.27958e-18	2	Rpl17
Myl1	3.85925e-22	0.39725	1	0.851	6.07022e-18	2	Myl1
Igfbp2	2.46183e-21	0.744387	0.946	0.621	3.87221e-17	2	Igfbp2
Rps12	2.56997e-21	0.270783	1	1	4.04231e-17	2	Rps12
Rpl10a	2.77091e-21	0.27059	1	1	4.35837e-17	2	Rpl10a
Itm2c	3.03342e-21	0.504024	1	0.979	4.77126e-17	2	Itm2c
Capn6	4.83318e-21	0.606265	0.986	0.823	7.60211e-17	2	Capn6
Rpl12	6.7477e-21	0.283973	1	1	1.06135e-16	2	Rpl12
Rps27	7.93677e-21	0.399131	1	1	1.24837e-16	2	Rps27
Pam	8.42273e-21	0.537274	1	1	1.32481e-16	2	Pam
Upk1b	8.65018e-21	0.710583	0.649	0.224	1.36059e-16	2	Upk1b
Tmem151a	1.83023e-20	0.527979	0.459	0.106	2.87877e-16	2	Tmem151a
Rps18	1.93648e-20	0.275251	1	1	3.04589e-16	2	Rps18
Tnxb	5.67659e-20	0.791863	1	0.866	8.92871e-16	2	Tnxb
Epha4	1.15663e-19	0.641668	0.878	0.499	1.81927e-15	2	Epha4
Lgals7	1.51676e-19	0.591348	0.649	0.216	2.38572e-15	2	Lgals7
Igfbp6	2.33888e-19	0.916897	0.865	0.497	3.67883e-15	2	Igfbp6
Tbx5	3.52282e-19	0.630144	0.878	0.477	5.54105e-15	2	Tbx5
Rplp0	3.54551e-19	0.27157	1	1	5.57674e-15	2	Rplp0
Rps5	5.23199e-19	0.271998	1	1	8.2294e-15	2	Rps5
Rpl29	6.1991e-19	0.268097	1	1	9.75057e-15	2	Rpl29
Rps6	1.01206e-18	0.257517	1	1	1.59188e-14	2	Rps6
Reep5	1.9063e-18	0.363011	1	1	2.99843e-14	2	Reep5
Bex41	3.62982e-18	0.539734	1	0.977	5.70935e-14	2	Bex4
Fras1	3.63478e-18	0.640631	0.878	0.587	5.71715e-14	2	Fras1
Rpl22l1	5.10135e-18	0.302928	1	1	8.02391e-14	2	Rpl22l1
Tbx20	1.17655e-17	0.456342	1	0.979	1.85059e-13	2	Tbx20
Camk1d	1.88428e-17	0.560512	0.689	0.274	2.96379e-13	2	Camk1d
Ppl	2.06267e-17	0.36799	0.486	0.13	3.24438e-13	2	Ppl
Myrf	3.53034e-17	0.609206	0.662	0.265	5.55288e-13	2	Myrf
Npr3	4.81426e-17	0.617192	0.986	0.745	7.57234e-13	2	Npr3
Nr2f1	5.16945e-17	0.533964	0.797	0.366	8.13102e-13	2	Nr2f1
Hist3h2ba	6.54138e-17	0.385687	0.514	0.152	1.02889e-12	2	Hist3h2ba
Gpm6a	1.55589e-16	0.568627	0.73	0.309	2.44727e-12	2	Gpm6a
Ryr3	1.99696e-16	0.50122	0.622	0.231	3.14102e-12	2	Ryr3
Maged2	2.02723e-16	0.369342	1	1	3.18862e-12	2	Maged2
Tcf21	2.39696e-16	0.635272	0.986	0.846	3.77018e-12	2	Tcf21
Rpl34	2.48276e-16	0.280956	1	1	3.90514e-12	2	Rpl34
Megf6	3.7818e-16	0.550434	1	0.841	5.9484e-12	2	Megf6
Myl9	2.17829e-15	0.350693	1	1	3.42623e-11	2	Myl9
Myo5b	3.38946e-15	0.518178	0.473	0.147	5.33128e-11	2	Myo5b
Moxd1	3.78098e-15	0.812841	0.703	0.347	5.9471e-11	2	Moxd1
Ank1	8.11419e-15	0.401393	1	0.895	1.27628e-10	2	Ank1
Krt19	1.31571e-14	0.474467	0.824	0.47	2.06948e-10	2	Krt19
Mgst1	1.31743e-14	0.347584	0.986	0.729	2.07219e-10	2	Mgst1
Cfi	1.38578e-14	0.320163	0.297	0.063	2.1797e-10	2	Cfi
Cyp2s1	1.81256e-14	0.401227	0.514	0.171	2.85098e-10	2	Cyp2s1
Cldn15	2.76548e-14	0.470979	0.486	0.16	4.34983e-10	2	Cldn15
Aldh1b12	2.7988e-14	0.393421	1	0.985	4.40223e-10	2	Aldh1b1
Susd2	2.99723e-14	0.464406	0.73	0.327	4.71434e-10	2	Susd2
Ucp2	3.50136e-14	0.461937	1	0.952	5.50729e-10	2	Ucp2
Lsp1	4.26953e-14	0.47314	1	0.932	6.71554e-10	2	Lsp1
Rnase4	4.73833e-14	0.494699	0.973	0.748	7.45293e-10	2	Rnase4
Slurp1	6.58649e-14	0.48697	0.459	0.147	1.03599e-09	2	Slurp1
Hs6st2	7.04282e-14	0.45303	0.703	0.315	1.10776e-09	2	Hs6st2
Abcc8	7.95327e-14	0.512284	0.932	0.727	1.25097e-09	2	Abcc8
Rbp1	8.47458e-14	0.409405	1	0.989	1.33297e-09	2	Rbp1
Vsnl1	1.55368e-13	0.319071	0.716	0.306	2.44378e-09	2	Vsnl1
Csrp31	1.60125e-13	0.294536	1	1	2.51861e-09	2	Csrp3
Apoe	1.72308e-13	0.405863	1	0.999	2.71024e-09	2	Apoe
Dmkn	3.25533e-13	0.507416	0.608	0.256	5.12031e-09	2	Dmkn
Lrrn4	4.73367e-13	0.289289	0.297	0.067	7.44558e-09	2	Lrrn4
Frem2	1.07639e-12	0.506665	0.757	0.446	1.69306e-08	2	Frem2
Igf2	1.32418e-12	0.286344	1	1	2.08281e-08	2	Igf2
Dkk3	1.91448e-12	0.426494	1	0.852	3.01128e-08	2	Dkk3
Cpne5	3.41653e-12	0.48901	0.676	0.325	5.37386e-08	2	Cpne5
Atp2a2	3.90532e-12	0.283932	1	1	6.14268e-08	2	Atp2a2
Tfpi	4.02984e-12	0.392951	1	0.949	6.33854e-08	2	Tfpi
Smpd3	4.87999e-12	0.424102	0.541	0.218	7.67574e-08	2	Smpd3
Gucy1a3	5.07823e-12	0.462033	0.973	0.788	7.98754e-08	2	Gucy1a3
Kcnj5	5.88875e-12	0.456287	0.851	0.573	9.26242e-08	2	Kcnj5
Lppr5	6.00075e-12	0.350452	0.514	0.187	9.43858e-08	2	Lppr5
Kcnj3	6.16559e-12	0.461486	0.743	0.38	9.69785e-08	2	Kcnj3
Adamts19	7.66452e-12	0.513578	0.797	0.552	1.20555e-07	2	Adamts19
Tmem176b	7.6714e-12	0.298191	1	0.989	1.20663e-07	2	Tmem176b
Apoc1	9.50556e-12	0.470763	0.716	0.34	1.49513e-07	2	Apoc1
Uts2b	1.23292e-11	0.32849	0.446	0.147	1.93926e-07	2	Uts2b
Igfbp5	1.46154e-11	0.379122	1	0.936	2.29885e-07	2	Igfbp5
Rarres2	2.11416e-11	0.484905	0.973	0.849	3.32536e-07	2	Rarres2
Ankrd1	2.17173e-11	0.335123	1	1	3.41591e-07	2	Ankrd1
Gnao1	3.64625e-11	0.432231	0.811	0.53	5.73519e-07	2	Gnao1
Enpep	4.60525e-11	0.432734	0.703	0.376	7.2436e-07	2	Enpep
Hspb7	5.39948e-11	0.267931	1	1	8.49284e-07	2	Hspb7
Plvap	5.8284e-11	0.393516	1	0.832	9.1675e-07	2	Plvap
Bst1	6.08809e-11	0.324997	0.365	0.112	9.57596e-07	2	Bst1
Krt7	7.65303e-11	0.545993	0.608	0.29	1.20374e-06	2	Krt7
Gng13	8.39983e-11	0.439546	0.365	0.119	1.32121e-06	2	Gng13
Dcn	1.0222e-10	0.273241	1	0.998	1.60781e-06	2	Dcn
Dpt	1.42e-10	0.469856	1	0.945	2.23352e-06	2	Dpt
Nudt4	1.80283e-10	0.275349	1	1	2.83567e-06	2	Nudt4
Ctsl	1.80423e-10	0.27325	1	0.999	2.83787e-06	2	Ctsl
Arhgap1	2.01328e-10	0.315635	1	0.973	3.16669e-06	2	Arhgap1
Mt3	2.11447e-10	0.446728	0.986	0.914	3.32584e-06	2	Mt3
Il33	2.43029e-10	0.340246	0.595	0.264	3.82261e-06	2	Il33
Clic3	5.32847e-10	0.341194	0.378	0.126	8.38116e-06	2	Clic3
Fam49a	5.60627e-10	0.436685	0.757	0.513	8.8181e-06	2	Fam49a
Nr2f2	6.99139e-10	0.379007	0.878	0.706	1.09968e-05	2	Nr2f2
Pgm5	7.18274e-10	0.375396	0.986	0.95	1.12977e-05	2	Pgm5
Aif1l	9.13653e-10	0.441614	0.851	0.682	1.43708e-05	2	Aif1l
Snhg18	1.15864e-09	0.326349	1	0.953	1.82242e-05	2	Snhg18
Npc2	1.28202e-09	0.271732	1	1	2.01649e-05	2	Npc2
Slc7a7	1.52479e-09	0.428116	0.568	0.291	2.39835e-05	2	Slc7a7
Dpp4	1.79909e-09	0.420377	0.622	0.326	2.82979e-05	2	Dpp4
C530008M17Rik	1.81337e-09	0.336863	0.892	0.665	2.85224e-05	2	C530008M17Rik
Man2b1	2.19999e-09	0.359537	1	0.866	3.46037e-05	2	Man2b1
Col6a5	3.49724e-09	0.269032	0.27	0.077	5.50081e-05	2	Col6a5
Fbln1	3.50261e-09	0.371294	0.905	0.673	5.50926e-05	2	Fbln1
Gas1	3.68719e-09	0.366897	0.986	0.914	5.79958e-05	2	Gas1
Itga6	4.16658e-09	0.33168	0.986	0.878	6.55361e-05	2	Itga6
Ncoa4	4.24738e-09	0.359869	0.959	0.907	6.6807e-05	2	Ncoa4
Sdpr	5.82432e-09	0.298926	1	0.995	9.16108e-05	2	Sdpr
Arhgef4	7.65915e-09	0.261282	0.378	0.134	0.000120471	2	Arhgef4
Col4a5	8.7076e-09	0.307945	1	0.956	0.000136962	2	Col4a5
Emilin2	9.93897e-09	0.304223	0.986	0.942	0.00015633	2	Emilin2
Efnb1	1.09117e-08	0.333263	0.919	0.758	0.00017163	2	Efnb1
E2f8	1.17371e-08	0.433351	0.743	0.51	0.000184613	2	E2f8
Ifi27l2a	1.24501e-08	0.405846	0.743	0.474	0.000195828	2	Ifi27l2a
Grb14	1.42674e-08	0.339878	0.959	0.9	0.000224412	2	Grb14
Gm1673	1.50297e-08	0.3466	0.986	0.924	0.000236402	2	Gm1673
Arl5a	1.85673e-08	0.263605	1	0.97	0.000292045	2	Arl5a
Aebp1	1.8578e-08	0.341976	0.973	0.861	0.000292213	2	Aebp1
Ipo5	1.94451e-08	0.26948	1	0.994	0.000305852	2	Ipo5
Slc16a2	2.10377e-08	0.459792	0.932	0.791	0.000330902	2	Slc16a2
Lamb3	2.36549e-08	0.37827	0.662	0.361	0.000372068	2	Lamb3
Colec12	2.5806e-08	0.314421	0.878	0.613	0.000405902	2	Colec12
Arl4d	3.09394e-08	0.352418	0.595	0.318	0.000486645	2	Arl4d
Slc38a5	3.95447e-08	0.366931	0.595	0.314	0.000621998	2	Slc38a5
Serping1	4.85736e-08	0.305443	0.932	0.795	0.000764014	2	Serping1
Gcnt1	4.96282e-08	0.390687	0.757	0.558	0.000780601	2	Gcnt1
Wt1	5.2339e-08	0.367348	0.703	0.453	0.00082324	2	Wt1
Wisp1	6.01417e-08	0.396482	0.797	0.659	0.000945969	2	Wisp1
Pdlim4	6.78888e-08	0.30345	0.77	0.436	0.00106782	2	Pdlim4
Bst2	6.82124e-08	0.307007	0.919	0.721	0.00107291	2	Bst2
Serpine2	7.7095e-08	0.307722	0.973	0.866	0.00121263	2	Serpine2
Smim1	9.87421e-08	0.293427	0.932	0.732	0.00155311	2	Smim1
Smtnl2	1.45902e-07	0.298738	0.973	0.948	0.0022949	2	Smtnl2
Nedd4l	1.65232e-07	0.306768	0.959	0.919	0.00259894	2	Nedd4l
Hpgd	1.68089e-07	0.391007	0.5	0.257	0.00264387	2	Hpgd
Dcbld2	2.75379e-07	0.279998	0.986	0.903	0.00433144	2	Dcbld2
Aldh1a2	2.75954e-07	0.440019	0.716	0.564	0.00434048	2	Aldh1a2
Dok4	3.20385e-07	0.35541	0.919	0.793	0.00503933	2	Dok4
Dpep1	3.42043e-07	0.392198	0.797	0.583	0.00538	2	Dpep1
Hap1	3.51116e-07	0.277512	0.392	0.171	0.00552271	2	Hap1
Ppfibp1	4.68578e-07	0.291531	0.946	0.809	0.00737027	2	Ppfibp1
Timp3	4.85299e-07	0.284654	1	0.975	0.00763327	2	Timp3
Nr1d1	5.28611e-07	0.360878	0.649	0.415	0.00831452	2	Nr1d1
Prdx4	6.36951e-07	0.250093	1	0.999	0.0100186	2	Prdx4
Ccdc3	6.92239e-07	0.368943	0.662	0.411	0.0108882	2	Ccdc3
Pcp4l1	7.05985e-07	0.327994	1	0.917	0.0111044	2	Pcp4l1
Ppp1r1b1	8.2123e-07	0.355063	0.892	0.735	0.0129171	2	Ppp1r1b
Trdn	8.71752e-07	0.296973	0.757	0.559	0.0137118	2	Trdn
Wfdc18	9.88629e-07	1.00768	0.635	0.422	0.0155502	2	Wfdc18
Sbsn	1.09751e-06	0.3217	0.392	0.179	0.0172628	2	Sbsn
Gstm2	1.11699e-06	0.268667	0.959	0.918	0.0175691	2	Gstm2
Sulf1	1.30246e-06	0.354707	0.838	0.751	0.0204863	2	Sulf1
Nrtn	1.87715e-06	0.259315	0.946	0.85	0.0295256	2	Nrtn
Gng2	1.92586e-06	0.26902	0.986	0.953	0.0302918	2	Gng2
Pdpn	2.05787e-06	0.290225	0.797	0.553	0.0323683	2	Pdpn
Corin	2.41095e-06	0.25324	0.946	0.846	0.0379219	2	Corin
Adgrd1	2.42694e-06	0.317256	0.392	0.191	0.0381733	2	Adgrd1
Csf1r	3.17459e-06	0.318634	0.743	0.532	0.0499331	2	Csf1r
Rgs12	3.54159e-06	0.274577	0.851	0.736	0.0557056	2	Rgs12
Aplp1	5.73477e-06	0.323982	0.568	0.347	0.0902023	2	Aplp1
Arhgap31	6.15534e-06	0.25947	1	0.96	0.0968173	2	Arhgap31
Sort1	6.43631e-06	0.305529	0.959	0.886	0.101237	2	Sort1
Ccl2	7.14995e-06	0.304064	0.473	0.261	0.112461	2	Ccl2
Arfgef1	7.34675e-06	0.288676	0.959	0.827	0.115557	2	Arfgef1
Arhgap24	9.42931e-06	0.250555	0.676	0.431	0.148314	2	Arhgap24
Col23a1	9.75705e-06	0.293643	0.676	0.456	0.153469	2	Col23a1
Abhd4	1.00436e-05	0.252012	0.986	0.911	0.157976	2	Abhd4
Ptgs1	1.18494e-05	0.286899	0.635	0.436	0.186379	2	Ptgs1
Trim54	1.1974e-05	0.281179	0.514	0.306	0.188339	2	Trim54
Slit3	1.59303e-05	0.261158	0.73	0.504	0.250568	2	Slit3
Zfp579	1.7998e-05	0.292807	0.865	0.725	0.28309	2	Zfp579
Tbc1d16	2.07573e-05	0.262122	0.959	0.916	0.326492	2	Tbc1d16
Tmx4	2.13729e-05	0.271638	0.946	0.885	0.336175	2	Tmx4
Ubac2	2.20583e-05	0.266658	0.919	0.825	0.346955	2	Ubac2
Cyp2d22	2.71592e-05	0.317504	0.649	0.456	0.427186	2	Cyp2d22
Adm	4.31036e-05	0.301404	0.541	0.335	0.677977	2	Adm
Ica1	4.36504e-05	0.299906	0.595	0.406	0.686577	2	Ica1
Golm1	4.67136e-05	0.269982	0.811	0.66	0.734759	2	Golm1
C1qa	5.27481e-05	0.361622	0.784	0.62	0.829675	2	C1qa
Wdr92	5.69157e-05	0.320064	0.635	0.465	0.895227	2	Wdr92
Trim11	6.01251e-05	0.294388	0.919	0.817	0.945708	2	Trim11
Rhpn2	6.26018e-05	0.282202	0.392	0.22	0.984664	2	Rhpn2
Adamts7	6.58205e-05	0.292623	0.77	0.611	1	2	Adamts7
Mgmt	6.88542e-05	0.252119	0.676	0.476	1	2	Mgmt
Plxna4	9.45394e-05	0.251221	0.473	0.281	1	2	Plxna4
C1qc	0.000153556	0.311601	0.757	0.633	1	2	C1qc
Pla2g7	0.000158104	0.255096	0.595	0.417	1	2	Pla2g7
Olfm1	0.000196599	0.331287	0.689	0.535	1	2	Olfm1
Ddit4l	0.000210575	0.281576	0.27	0.132	1	2	Ddit4l
Gstm1	0.000210586	0.29479	0.973	0.959	1	2	Gstm1
Creg1	0.000216541	0.26368	0.919	0.833	1	2	Creg1
Sfrp1	0.000394395	0.412731	0.973	0.965	1	2	Sfrp1
Serpinb6b	0.000471129	0.263987	0.635	0.487	1	2	Serpinb6b
Cpox	0.000832174	0.254414	0.757	0.614	1	2	Cpox
Adcy1	0.000925741	0.253619	0.405	0.248	1	2	Adcy1
Rem1	0.00109181	0.270708	0.716	0.579	1	2	Rem1
Hey1	0.00123289	0.267696	0.622	0.463	1	2	Hey1
Acp6	0.00243009	0.261195	0.824	0.713	1	2	Acp6
Irx3	1.27952e-42	1.07165	0.971	0.372	2.01256e-38	3	Irx3
Irx5	2.1591e-39	0.825196	0.913	0.266	3.39605e-35	3	Irx5
Chrng	5.32204e-39	0.446968	0.522	0.067	8.37103e-35	3	Chrng
2310002L09Rik	9.51306e-35	0.314821	0.435	0.05	1.49631e-30	3	2310002L09Rik
Mpped2	2.32427e-32	0.899747	0.986	0.496	3.65585e-28	3	Mpped2
Crnde	4.01938e-32	1.02842	0.768	0.247	6.32209e-28	3	Crnde
Cited1	1.3208e-31	0.771537	1	0.995	2.07749e-27	3	Cited1
Fabp5	1.70445e-31	0.739753	1	1	2.68092e-27	3	Fabp5
Dcpp1	2.21768e-31	2.61936	0.768	0.238	3.48819e-27	3	Dcpp1
Dcpp2	2.7544e-31	1.52331	0.478	0.078	4.3324e-27	3	Dcpp2
Ankrd63	3.44961e-31	0.805752	0.841	0.27	5.42589e-27	3	Ankrd63
Tsc22d3	3.45343e-31	0.873972	1	0.99	5.4319e-27	3	Tsc22d3
Slc16a12	6.83055e-31	0.693098	0.783	0.215	1.07438e-26	3	Slc16a12
Scn5a	7.12277e-31	0.926725	0.986	0.866	1.12034e-26	3	Scn5a
Vwf	5.0151e-27	0.824506	1	0.824	7.88825e-23	3	Vwf
Emcn	3.60926e-26	0.917787	1	0.89	5.677e-22	3	Emcn
Asb15	1.54369e-25	0.259527	0.319	0.037	2.42808e-21	3	Asb15
Amhr2	2.96374e-25	0.502678	0.507	0.104	4.66167e-21	3	Amhr2
Cfh	5.56315e-25	0.864928	0.971	0.576	8.75028e-21	3	Cfh
Slit2	6.53389e-25	0.95225	0.899	0.448	1.02772e-20	3	Slit2
Scn10a	1.03249e-24	0.49357	0.551	0.121	1.62401e-20	3	Scn10a
Ldha1	1.94528e-24	0.385214	1	1	3.05974e-20	3	Ldha
Plvap1	2.11011e-24	0.852336	1	0.832	3.31899e-20	3	Plvap
Sema3a	2.15156e-24	0.6908	0.739	0.257	3.38419e-20	3	Sema3a
Bcam	4.8765e-24	0.438979	1	1	7.67025e-20	3	Bcam
Gm826	1.25576e-23	0.489101	0.551	0.129	1.97518e-19	3	Gm826
Irx2	2.31978e-23	0.825124	0.783	0.286	3.64878e-19	3	Irx2
Npr31	7.43011e-23	0.784873	1	0.745	1.16868e-18	3	Npr3
Mal	1.37311e-22	0.464036	0.522	0.121	2.15976e-18	3	Mal
Tesc1	3.9459e-22	0.729848	0.986	0.751	6.2065e-18	3	Tesc
Slc6a6	6.59838e-21	0.682147	0.986	0.75	1.03786e-16	3	Slc6a6
Gtsf1	2.99108e-20	0.586109	0.841	0.368	4.70466e-16	3	Gtsf1
Pla2g5	4.68605e-20	0.31419	0.493	0.11	7.37068e-16	3	Pla2g5
Ablim3	4.73638e-20	0.610629	0.913	0.517	7.44986e-16	3	Ablim3
Casq2	7.82031e-20	0.400838	1	0.999	1.23006e-15	3	Casq2
Tmem108	1.80057e-19	0.587265	0.986	0.603	2.83211e-15	3	Tmem108
Ece1	2.64915e-19	0.613919	1	0.915	4.16685e-15	3	Ece1
Thbs4	3.47546e-19	0.642552	0.942	0.597	5.46655e-15	3	Thbs4
Tgm2	4.75479e-19	0.402059	1	0.998	7.47881e-15	3	Tgm2
Prr15	5.44017e-19	0.486145	0.623	0.195	8.55685e-15	3	Prr15
Wif1	9.03984e-19	0.600155	0.884	0.422	1.42188e-14	3	Wif1
Lrrc101	1.23504e-18	0.571768	1	0.855	1.94259e-14	3	Lrrc10
Rps6ka2	1.54623e-18	0.654268	0.971	0.668	2.43207e-14	3	Rps6ka2
Fam174b	1.5745e-18	0.5467	0.986	0.885	2.47653e-14	3	Fam174b
Hopx2	1.82936e-18	0.458451	1	0.999	2.8774e-14	3	Hopx
Hmcn1	3.95496e-18	0.599193	0.971	0.767	6.22075e-14	3	Hmcn1
Corin1	5.05173e-18	0.638314	1	0.843	7.94587e-14	3	Corin
Nsg2	1.33833e-17	0.274433	0.29	0.046	2.10506e-13	3	Nsg2
Cox8b2	2.51218e-17	0.409739	1	1	3.9514e-13	3	Cox8b
Ppp1r3b	3.04128e-17	0.613024	0.971	0.783	4.78363e-13	3	Ppp1r3b
Slco3a1	3.44376e-17	0.761194	0.812	0.445	5.4167e-13	3	Slco3a1
Spink4	8.21204e-17	0.494342	0.623	0.217	1.29167e-12	3	Spink4
Eng	9.08946e-17	0.4623	1	0.993	1.42968e-12	3	Eng
Oit3	1.47187e-16	0.43855	0.522	0.154	2.31511e-12	3	Oit3
Ephb3	1.68272e-16	0.536333	0.754	0.351	2.64675e-12	3	Ephb3
Lpl	3.49955e-16	0.366094	1	0.999	5.50445e-12	3	Lpl
Atp1a1	4.11335e-16	0.315036	1	1	6.4699e-12	3	Atp1a1
Irx1	5.82066e-16	0.48296	0.652	0.232	9.15532e-12	3	Irx1
Tpm11	1.27506e-15	0.260776	1	1	2.00555e-11	3	Tpm1
Cacna2d2	1.5022e-15	0.739955	0.696	0.288	2.36281e-11	3	Cacna2d2
Pygm	1.77216e-15	0.338845	1	0.999	2.78744e-11	3	Pygm
Hrc	2.28937e-15	0.485996	1	0.965	3.60095e-11	3	Hrc
Pln2	2.2954e-15	0.445878	1	1	3.61044e-11	3	Pln
5430431A17Rik	2.40253e-15	0.406036	1	0.998	3.77894e-11	3	5430431A17Rik
Ramp1	3.74254e-15	0.484975	1	0.978	5.88664e-11	3	Ramp1
Acer2	5.81989e-15	0.595983	0.87	0.548	9.1541e-11	3	Acer2
Hmga2	8.3977e-15	0.453781	0.565	0.199	1.32087e-10	3	Hmga2
Eno31	8.51264e-15	0.327741	1	1	1.33895e-10	3	Eno3
Dbh	9.49188e-15	0.452353	0.594	0.213	1.49298e-10	3	Dbh
G0s2	1.04752e-14	0.379694	1	0.983	1.64764e-10	3	G0s2
Stox2	1.18137e-14	0.4719	0.855	0.469	1.85817e-10	3	Stox2
Gpr182	1.19557e-14	0.48428	0.739	0.353	1.88051e-10	3	Gpr182
Uqcrq1	1.32164e-14	0.267783	1	1	2.07881e-10	3	Uqcrq
Apobec2	1.38639e-14	0.386947	1	0.992	2.18066e-10	3	Apobec2
Rasgef1b	2.28499e-14	0.508184	0.783	0.4	3.59406e-10	3	Rasgef1b
Sgca	3.08946e-14	0.437211	0.986	0.709	4.85942e-10	3	Sgca
Bace2	5.13079e-14	0.614477	0.87	0.54	8.07022e-10	3	Bace2
Mov10l11	6.20082e-14	0.475902	1	0.781	9.75327e-10	3	Mov10l1
1110032F04Rik	1.97105e-13	0.394747	0.377	0.102	3.10026e-09	3	1110032F04Rik
Ttc12	1.99172e-13	0.393625	0.565	0.213	3.13278e-09	3	Ttc12
Col23a11	2.66563e-13	0.435703	0.841	0.449	4.19277e-09	3	Col23a1
Crip22	3.32825e-13	0.307944	1	1	5.23501e-09	3	Crip2
Tm4sf1	3.34079e-13	0.426569	0.986	0.968	5.25472e-09	3	Tm4sf1
Igsf1	3.56766e-13	0.449645	0.507	0.182	5.61158e-09	3	Igsf1
Adck31	4.42052e-13	0.413054	0.986	0.874	6.95303e-09	3	Adck3
Fam65b	4.70555e-13	0.400436	0.855	0.469	7.40135e-09	3	Fam65b
Id2	7.47062e-13	0.534674	0.986	0.898	1.17505e-08	3	Id2
Gmpr1	9.05186e-13	0.364056	1	0.976	1.42377e-08	3	Gmpr
Tppp	1.037e-12	0.35712	0.739	0.326	1.63109e-08	3	Tppp
Nudt3	1.76186e-12	0.331485	1	0.998	2.77123e-08	3	Nudt3
Mylk4	1.93341e-12	0.436312	0.768	0.425	3.04106e-08	3	Mylk4
Dpp41	2.33772e-12	0.435232	0.71	0.323	3.677e-08	3	Dpp4
Trim47	2.33987e-12	0.32806	0.986	0.983	3.68038e-08	3	Trim47
Mgst31	2.8062e-12	0.315213	1	0.999	4.41387e-08	3	Mgst3
Tmem100	3.81537e-12	0.45641	0.768	0.411	6.00119e-08	3	Tmem100
Slc1a1	4.53898e-12	0.331188	0.522	0.185	7.13936e-08	3	Slc1a1
Otud1	4.66937e-12	0.385471	0.884	0.497	7.34445e-08	3	Otud1
Ddc2	4.68971e-12	0.442857	1	0.92	7.37644e-08	3	Ddc
Gbe1	4.78793e-12	0.438691	0.986	0.888	7.53093e-08	3	Gbe1
Phlda1	4.86633e-12	0.396715	0.942	0.684	7.65425e-08	3	Phlda1
Cited2	6.11066e-12	0.455559	0.928	0.745	9.61146e-08	3	Cited2
Gstm11	6.73506e-12	0.363963	0.986	0.958	1.05936e-07	3	Gstm1
Sorcs2	6.99525e-12	0.473287	0.783	0.459	1.10028e-07	3	Sorcs2
Ctla2a	7.09733e-12	0.392564	1	0.946	1.11634e-07	3	Ctla2a
Adgrb2	8.65315e-12	0.4758	0.739	0.377	1.36105e-07	3	Adgrb2
Etv1	8.66652e-12	0.481774	0.739	0.4	1.36316e-07	3	Etv1
Art1	8.94474e-12	0.353423	0.362	0.102	1.40692e-07	3	Art1
Hfe2	1.19852e-11	0.456727	0.899	0.627	1.88515e-07	3	Hfe2
Igf2r	1.21587e-11	0.315538	1	1	1.91244e-07	3	Igf2r
1700120C14Rik1	1.80983e-11	0.439671	0.884	0.583	2.84668e-07	3	1700120C14Rik
Epha7	2.93768e-11	0.404394	0.797	0.447	4.62067e-07	3	Epha7
Ncam1	3.29029e-11	0.269076	1	0.998	5.1753e-07	3	Ncam1
Tom1l1	3.43382e-11	0.404703	0.783	0.482	5.40105e-07	3	Tom1l1
S100a11	3.84333e-11	0.304148	1	0.999	6.04518e-07	3	S100a1
Lrrc3b	3.89283e-11	0.344795	0.725	0.336	6.12304e-07	3	Lrrc3b
Pdlim51	4.05543e-11	0.29743	1	0.999	6.37879e-07	3	Pdlim5
Camta1	4.99354e-11	0.331243	1	0.986	7.85434e-07	3	Camta1
Slc8a11	5.62259e-11	0.278656	1	0.999	8.84377e-07	3	Slc8a1
Adprhl11	6.43401e-11	0.314591	1	0.99	1.01201e-06	3	Adprhl1
Kcne11	6.83002e-11	0.467416	1	0.947	1.07429e-06	3	Kcne1
Klhdc8b	7.28626e-11	0.393485	1	0.95	1.14606e-06	3	Klhdc8b
Atp1b1	8.81974e-11	0.299985	1	1	1.38726e-06	3	Atp1b1
Abtb2	9.24531e-11	0.374736	0.899	0.671	1.45419e-06	3	Abtb2
Myl22	9.27655e-11	0.445972	1	1	1.45911e-06	3	Myl2
Kcng21	1.03229e-10	0.309069	1	0.982	1.62369e-06	3	Kcng2
Plekha7	1.11083e-10	0.465281	0.942	0.722	1.74723e-06	3	Plekha7
Apoc11	1.26276e-10	0.417624	0.681	0.343	1.98619e-06	3	Apoc1
Rtn4rl1	1.76973e-10	0.355307	0.942	0.586	2.78361e-06	3	Rtn4rl1
Gja12	1.80474e-10	0.301078	1	0.996	2.83867e-06	3	Gja1
9630028I04Rik1	2.05343e-10	0.366297	0.638	0.304	3.22984e-06	3	9630028I04Rik
Eef1a21	2.68585e-10	0.3133	1	0.987	4.22457e-06	3	Eef1a2
Nkx2-51	2.93973e-10	0.344628	1	0.983	4.6239e-06	3	Nkx2-5
Fitm1	5.93533e-10	0.366616	1	0.927	9.33568e-06	3	Fitm1
Mfn21	6.04051e-10	0.287903	1	0.998	9.50112e-06	3	Mfn2
Idh22	7.00244e-10	0.256132	1	1	1.10141e-05	3	Idh2
Tmem2	7.0383e-10	0.429533	0.913	0.672	1.10705e-05	3	Tmem2
Smyd11	7.11271e-10	0.289931	0.986	0.987	1.11876e-05	3	Smyd1
Clip4	7.42164e-10	0.390048	0.957	0.792	1.16735e-05	3	Clip4
Sema3b	8.12286e-10	0.337336	0.826	0.497	1.27765e-05	3	Sema3b
Phactr3	1.20434e-09	0.347097	0.377	0.13	1.89431e-05	3	Phactr3
Ank11	1.27555e-09	0.383625	0.971	0.897	2.00632e-05	3	Ank1
Dsc2	1.30894e-09	0.358079	0.623	0.318	2.05882e-05	3	Dsc2
Col13a1	1.62589e-09	0.270515	0.449	0.166	2.55736e-05	3	Col13a1
Cox6a21	1.7005e-09	0.261646	1	1	2.67472e-05	3	Cox6a2
Ppp1r14c1	2.2203e-09	0.335571	1	0.982	3.49231e-05	3	Ppp1r14c
Dsg2	2.90339e-09	0.323805	0.899	0.634	4.56674e-05	3	Dsg2
Trdn1	3.33069e-09	0.370618	0.841	0.556	5.23884e-05	3	Trdn
1190002N15Rik	3.51871e-09	0.334805	0.971	0.862	5.53457e-05	3	1190002N15Rik
Dsp2	3.70745e-09	0.270561	1	0.996	5.83145e-05	3	Dsp
Pfkm1	3.9622e-09	0.263342	1	0.996	6.23214e-05	3	Pfkm
Ypel5	4.5229e-09	0.336743	0.986	0.888	7.11407e-05	3	Ypel5
A2m	4.60678e-09	0.299031	0.478	0.199	7.246e-05	3	A2m
Klhl23	4.95261e-09	0.320397	1	0.936	7.78996e-05	3	Klhl23
Gbp4	5.17094e-09	0.269178	0.391	0.137	8.13337e-05	3	Gbp4
Higd1a2	5.2228e-09	0.257318	1	1	8.21494e-05	3	Higd1a
Dlc1	5.33746e-09	0.275243	1	0.955	8.39529e-05	3	Dlc1
Obscn1	5.75004e-09	0.262295	1	0.999	9.04424e-05	3	Obscn
Fez2	6.65353e-09	0.350643	0.986	0.882	0.000104653	3	Fez2
Adssl12	6.66086e-09	0.291959	1	0.958	0.000104769	3	Adssl1
Lgi3	6.92805e-09	0.438796	0.435	0.178	0.000108971	3	Lgi3
Ndufab11	7.24638e-09	0.271423	1	1	0.000113978	3	Ndufab1
Fgf11	7.25247e-09	0.404322	0.696	0.402	0.000114074	3	Fgf1
Fry	9.21862e-09	0.34231	0.942	0.837	0.000145	3	Fry
Hspb31	9.29536e-09	0.35317	0.971	0.851	0.000146207	3	Hspb3
Gpr22	9.48254e-09	0.341921	0.493	0.218	0.000149151	3	Gpr22
Agl	1.11221e-08	0.270273	1	0.99	0.00017494	3	Agl
Rtn2	1.15889e-08	0.347123	0.899	0.642	0.000182281	3	Rtn2
Acsl3	1.22442e-08	0.352769	0.928	0.771	0.000192589	3	Acsl3
Ech1	1.22945e-08	0.263395	1	0.999	0.000193381	3	Ech1
Kcnj12	1.36311e-08	0.336652	0.71	0.404	0.000214404	3	Kcnj12
Aldh1a21	1.36854e-08	0.34063	0.87	0.556	0.000215257	3	Aldh1a2
Cdh161	1.49702e-08	0.31706	0.855	0.509	0.000235466	3	Cdh16
Gsta4	1.61821e-08	0.283719	1	0.967	0.000254528	3	Gsta4
Mitf	1.76976e-08	0.346435	0.928	0.734	0.000278365	3	Mitf
Bnip31	1.79504e-08	0.317695	1	0.993	0.000282342	3	Bnip3
Amigo2	1.90604e-08	0.311114	0.58	0.275	0.0002998	3	Amigo2
Cpne51	2.14109e-08	0.475779	0.638	0.328	0.000336772	3	Cpne5
Sall1	2.19631e-08	0.315858	0.464	0.191	0.000345458	3	Sall1
Acot132	2.20971e-08	0.275426	1	0.999	0.000347565	3	Acot13
Ptges3l1	2.21343e-08	0.283893	1	0.965	0.00034815	3	Ptges3l
Manba	2.3783e-08	0.318449	0.87	0.562	0.000374082	3	Manba
Vcan	2.38116e-08	0.338397	1	0.935	0.000374533	3	Vcan
Inpp5a1	2.39556e-08	0.262179	1	0.994	0.000376797	3	Inpp5a
Inpp4b	2.39698e-08	0.305655	0.464	0.202	0.000377021	3	Inpp4b
Frem1	2.45525e-08	0.325411	0.551	0.265	0.000386186	3	Frem1
Pacsin3	2.7578e-08	0.283165	1	0.922	0.000433775	3	Pacsin3
Fbxo32	2.76876e-08	0.31781	0.768	0.442	0.000435498	3	Fbxo32
Tcap1	2.8157e-08	0.26767	1	0.994	0.000442881	3	Tcap
Sdsl1	3.0626e-08	0.287682	0.855	0.583	0.000481717	3	Sdsl
Tle6	3.30279e-08	0.303029	0.652	0.352	0.000519496	3	Tle6
Car8	3.91323e-08	0.34711	0.652	0.343	0.000615512	3	Car8
Ogfrl1	4.12921e-08	0.311659	0.71	0.399	0.000649483	3	Ogfrl1
Smyd22	4.13093e-08	0.261038	1	0.987	0.000649754	3	Smyd2
Mylk31	4.19345e-08	0.353167	0.957	0.825	0.000659587	3	Mylk3
Asb111	4.21632e-08	0.351829	0.957	0.686	0.000663184	3	Asb11
Gm5611	4.33559e-08	0.272216	1	0.982	0.000681945	3	Gm561
Klhl4	4.53745e-08	0.339463	0.812	0.528	0.000713695	3	Klhl4
Adm1	5.21994e-08	0.302639	0.638	0.331	0.000821044	3	Adm
Fam49a1	5.49787e-08	0.324902	0.826	0.511	0.000864761	3	Fam49a
Myzap	6.71545e-08	0.267597	1	0.972	0.00105627	3	Myzap
Rabgap1l	7.86389e-08	0.342557	0.913	0.701	0.00123691	3	Rabgap1l
Ptgs11	8.37736e-08	0.341341	0.71	0.433	0.00131768	3	Ptgs1
Myl32	8.52348e-08	0.387482	1	1	0.00134066	3	Myl3
Kcnj2	8.69823e-08	0.302316	0.667	0.358	0.00136815	3	Kcnj2
Wipf3	8.98563e-08	0.315195	0.71	0.411	0.00141335	3	Wipf3
Lpar32	1.0494e-07	0.280316	0.913	0.602	0.00165061	3	Lpar3
Neurl2	1.16681e-07	0.274751	0.899	0.771	0.00183528	3	Neurl2
Tmod11	1.1816e-07	0.259284	1	0.997	0.00185854	3	Tmod1
Rasl10b	1.18576e-07	0.329994	0.797	0.494	0.00186508	3	Rasl10b
Nol4l	1.3463e-07	0.270997	0.754	0.442	0.0021176	3	Nol4l
Camk1g	1.42653e-07	0.290357	0.565	0.291	0.00224379	3	Camk1g
Mmrn2	1.55238e-07	0.33825	0.942	0.813	0.00244174	3	Mmrn2
Atrnl1	1.57293e-07	0.327224	0.87	0.643	0.00247406	3	Atrnl1
Slc2a41	1.69405e-07	0.311901	1	0.912	0.00266457	3	Slc2a4
Scarb2	1.69787e-07	0.309127	0.783	0.519	0.00267058	3	Scarb2
Myh72	1.71486e-07	0.401276	1	1	0.00269731	3	Myh7
9330158H04Rik	1.7183e-07	0.263463	0.609	0.297	0.00270272	3	9330158H04Rik
Macrod11	1.75533e-07	0.308271	1	0.937	0.00276096	3	Macrod1
Afap1l1	1.91734e-07	0.277895	1	0.976	0.00301578	3	Afap1l1
Smoc1	1.98295e-07	0.304693	0.652	0.36	0.00311897	3	Smoc1
Sh3tc1	2.03876e-07	0.259925	0.623	0.322	0.00320677	3	Sh3tc1
Hk11	2.09595e-07	0.260479	1	0.994	0.00329671	3	Hk1
Cgnl1	2.11264e-07	0.284941	0.942	0.831	0.00332298	3	Cgnl1
Kcnh21	2.32931e-07	0.2845	0.986	0.957	0.00366377	3	Kcnh2
Plxnc1	2.50833e-07	0.276306	0.638	0.344	0.00394536	3	Plxnc1
Pptc7	2.78679e-07	0.291843	0.957	0.71	0.00438334	3	Pptc7
Ednrb	2.86804e-07	0.267996	0.855	0.587	0.00451114	3	Ednrb
Syt7	2.94949e-07	0.297216	0.594	0.324	0.00463925	3	Syt7
Cdkn1a	3.06368e-07	0.277144	0.913	0.67	0.00481887	3	Cdkn1a
Ptgr21	3.17985e-07	0.257459	1	0.974	0.00500159	3	Ptgr2
Slc22a23	3.19031e-07	0.280956	0.638	0.361	0.00501804	3	Slc22a23
Man1c1	3.3762e-07	0.269367	0.913	0.67	0.00531043	3	Man1c1
Ezr	3.38988e-07	0.250034	1	0.982	0.00533195	3	Ezr
Sh3bp5	3.4005e-07	0.296775	0.768	0.485	0.00534865	3	Sh3bp5
Pgbd5	3.525e-07	0.295022	0.406	0.18	0.00554447	3	Pgbd5
Tek	3.59308e-07	0.302711	0.971	0.854	0.00565156	3	Tek
Yipf7	3.61069e-07	0.298616	0.797	0.536	0.00567925	3	Yipf7
B4gat1	4.51102e-07	0.287991	0.957	0.802	0.00709538	3	B4gat1
Dusp18	4.84849e-07	0.286772	0.609	0.332	0.00762619	3	Dusp18
Fgl2	5.42742e-07	0.309947	0.971	0.888	0.00853679	3	Fgl2
Ptp4a1	5.46703e-07	0.281867	0.841	0.611	0.0085991	3	Ptp4a1
Slc22a11	6.23593e-07	0.288363	0.754	0.453	0.0098085	3	Slc22a1
1700040L02Rik	6.3052e-07	0.304822	0.768	0.505	0.00991745	3	1700040L02Rik
Tmem35	7.15476e-07	0.266413	0.812	0.505	0.0112537	3	Tmem35
Yae1d1	7.21994e-07	0.294161	0.957	0.775	0.0113562	3	Yae1d1
Col4a51	7.32359e-07	0.255857	1	0.957	0.0115193	3	Col4a5
Mid2	7.69307e-07	0.272348	0.855	0.561	0.0121004	3	Mid2
Cd1d1	8.11879e-07	0.297096	0.812	0.561	0.01277	3	Cd1d1
Dhrs7c	8.79049e-07	0.255593	0.986	0.917	0.0138266	3	Dhrs7c
Ndufa101	8.92636e-07	0.258222	1	0.99	0.0140403	3	Ndufa10
Inafm2	9.17693e-07	0.314083	0.928	0.828	0.0144344	3	Inafm2
Ppapdc3	9.73393e-07	0.308253	0.725	0.433	0.0153105	3	Ppapdc3
Kif1a	9.92672e-07	0.27523	0.638	0.361	0.0156137	3	Kif1a
Sdc4	9.93202e-07	0.328908	0.725	0.481	0.0156221	3	Sdc4
Vamp5	9.95618e-07	0.322541	0.913	0.799	0.0156601	3	Vamp5
Ankrd50	1.03548e-06	0.287587	0.942	0.698	0.0162871	3	Ankrd50
Lynx1	1.06416e-06	0.290475	0.754	0.494	0.0167381	3	Lynx1
Mrap	1.07368e-06	0.294077	0.855	0.652	0.0168878	3	Mrap
Eno2	1.11746e-06	0.341833	0.623	0.371	0.0175765	3	Eno2
Fam78a	1.13619e-06	0.287123	0.899	0.602	0.0178712	3	Fam78a
Pde1c1	1.23934e-06	0.293351	0.768	0.499	0.0194936	3	Pde1c
3632451O06Rik	1.33605e-06	0.310415	0.623	0.358	0.0210147	3	3632451O06Rik
Msrb2	1.4211e-06	0.263923	0.899	0.648	0.0223524	3	Msrb2
Srgap1	1.43674e-06	0.265853	0.638	0.357	0.0225986	3	Srgap1
Sgcg	1.50037e-06	0.278207	1	0.921	0.0235993	3	Sgcg
Nfe2l1	1.54122e-06	0.262473	1	0.982	0.0242419	3	Nfe2l1
Fuca2	1.61395e-06	0.283103	0.986	0.927	0.0253858	3	Fuca2
Dolk	1.62664e-06	0.300279	0.754	0.5	0.0255854	3	Dolk
Itga7	1.64088e-06	0.366794	0.841	0.605	0.0258094	3	Itga7
Extl2	1.73056e-06	0.287973	0.797	0.545	0.02722	3	Extl2
Tspan2	1.7406e-06	0.279684	0.971	0.723	0.0273779	3	Tspan2
Lmod21	2.05829e-06	0.289373	0.87	0.703	0.0323748	3	Lmod2
Kctd1	2.12434e-06	0.279895	0.594	0.341	0.0334137	3	Kctd1
Txlnb	2.21137e-06	0.295621	0.957	0.818	0.0347827	3	Txlnb
Lbh2	2.37047e-06	0.261461	1	0.997	0.0372851	3	Lbh
Plk2	2.69484e-06	0.266559	0.957	0.936	0.0423872	3	Plk2
Abcc9	2.70976e-06	0.250996	1	0.965	0.0426219	3	Abcc9
Pex7	2.87867e-06	0.270078	0.826	0.564	0.0452786	3	Pex7
St3gal1	2.99539e-06	0.289252	0.783	0.557	0.0471145	3	St3gal1
5033428I22Rik	3.76849e-06	0.265018	0.681	0.407	0.0592746	3	5033428I22Rik
Ctsf	4.26714e-06	0.273073	0.826	0.584	0.0671178	3	Ctsf
Camk2a1	4.63973e-06	0.266446	0.899	0.664	0.0729784	3	Camk2a
Cacna1h	4.7823e-06	0.261437	0.971	0.745	0.0752208	3	Cacna1h
0610009B22Rik	4.82997e-06	0.259044	0.942	0.758	0.0759707	3	0610009B22Rik
Adam11	5.23061e-06	0.250369	0.739	0.478	0.0822722	3	Adam11
Atp6v1b21	5.43225e-06	0.257556	1	0.972	0.0854439	3	Atp6v1b2
Lrrc39	5.46652e-06	0.280402	0.928	0.724	0.0859828	3	Lrrc39
Fam189a21	5.51214e-06	0.261048	0.971	0.915	0.0867004	3	Fam189a2
Cd59a	6.91889e-06	0.264764	0.928	0.868	0.108827	3	Cd59a
Dip2b	7.21349e-06	0.305964	0.928	0.765	0.113461	3	Dip2b
Mylip	7.33921e-06	0.269515	0.638	0.401	0.115438	3	Mylip
Lrrc4b	8.06076e-06	0.253922	0.87	0.617	0.126788	3	Lrrc4b
Cxcl16	9.69461e-06	0.291151	0.565	0.344	0.152486	3	Cxcl16
Map2k5	9.96004e-06	0.254239	0.87	0.664	0.156662	3	Map2k5
C1qtnf4	1.05272e-05	0.260125	0.884	0.678	0.165583	3	C1qtnf4
Bik1	1.0858e-05	0.251134	0.855	0.646	0.170785	3	Bik
Clca3a1	1.13363e-05	0.254303	0.913	0.716	0.178309	3	Clca3a1
Sobp	1.26586e-05	0.27757	0.551	0.317	0.199107	3	Sobp
Tcf211	1.29381e-05	0.256234	0.942	0.848	0.203504	3	Tcf21
St6galnac3	1.43847e-05	0.266204	0.478	0.265	0.226257	3	St6galnac3
Atf6	1.60484e-05	0.266599	0.826	0.603	0.252426	3	Atf6
Fam81a	1.72041e-05	0.26689	0.594	0.361	0.270604	3	Fam81a
Smim51	1.80574e-05	0.27676	0.957	0.879	0.284025	3	Smim5
Setd6	1.83618e-05	0.258305	0.594	0.351	0.288813	3	Setd6
S100a8	1.95794e-05	0.609338	0.478	0.253	0.307964	3	S100a8
Rimkla	2.07191e-05	0.250717	0.536	0.312	0.32589	3	Rimkla
Leng1	2.18648e-05	0.250586	0.841	0.678	0.343912	3	Leng1
Uros	2.27407e-05	0.291138	0.667	0.46	0.357688	3	Uros
Spry2	2.40767e-05	0.336014	0.797	0.656	0.378703	3	Spry2
Fam213b1	2.4137e-05	0.267938	0.768	0.595	0.379651	3	Fam213b
1600014C10Rik	2.57238e-05	0.258263	0.667	0.405	0.404609	3	1600014C10Rik
Kif26b	2.61711e-05	0.270723	0.493	0.282	0.411646	3	Kif26b
Cpeb2	3.27254e-05	0.257478	0.768	0.577	0.514738	3	Cpeb2
Perm11	4.51058e-05	0.279607	0.841	0.627	0.709469	3	Perm1
Tti1	4.51392e-05	0.251357	0.797	0.586	0.709995	3	Tti1
Atp9a	4.82521e-05	0.251423	0.913	0.741	0.758957	3	Atp9a
Snx14	4.90287e-05	0.257859	0.87	0.677	0.771172	3	Snx14
Ppp1r1a1	5.21772e-05	0.262157	0.971	0.938	0.820695	3	Ppp1r1a
Spryd41	6.34416e-05	0.252606	0.913	0.692	0.997873	3	Spryd4
Sox7	6.67474e-05	0.276135	0.797	0.616	1	3	Sox7
Gpr146	9.31673e-05	0.26533	0.623	0.424	1	3	Gpr146
Actr6	9.52662e-05	0.260775	0.507	0.314	1	3	Actr6
Ascc1	0.00010497	0.282036	0.899	0.76	1	3	Ascc1
Colec11	0.000114047	0.2598	0.536	0.34	1	3	Colec11
Dgat21	0.000124601	0.255389	0.768	0.614	1	3	Dgat2
Rhox5	0.00013909	0.305727	0.478	0.294	1	3	Rhox5
Phtf2	0.00017245	0.255687	0.87	0.787	1	3	Phtf2
Lpin1	0.00021705	0.257899	0.609	0.413	1	3	Lpin1
Lamb31	0.000327514	0.313715	0.551	0.368	1	3	Lamb3
S100a9	0.000330678	0.58965	0.522	0.312	1	3	S100a9
BC100530	0.00953134	0.402968	0.333	0.208	1	3	BC100530
Sbk3	2.28889e-46	0.71211	0.631	0.084	3.6002e-42	4	Sbk3
Tmem1631	1.31126e-42	1.19267	0.985	0.325	2.06248e-38	4	Tmem163
Ap3b2	4.3987e-40	0.369263	0.369	0.028	6.91871e-36	4	Ap3b2
Fgf121	3.18019e-37	1.24566	1	0.449	5.00212e-33	4	Fgf12
Ankrd11	1.72945e-35	1.00848	1	1	2.72025e-31	4	Ankrd1
Kcnj31	1.94373e-35	0.965224	0.969	0.372	3.0573e-31	4	Kcnj3
Sln1	5.87185e-35	1.67703	1	1	9.23583e-31	4	Sln
Nppa1	1.55808e-34	1.69157	1	1	2.45071e-30	4	Nppa
Pvalb	1.58301e-34	0.656938	0.415	0.046	2.48991e-30	4	Pvalb
Stard101	5.57678e-34	1.22464	1	0.76	8.77171e-30	4	Stard10
Pam1	1.50123e-33	1.12475	1	1	2.36129e-29	4	Pam
Gpx31	4.68539e-33	1.223	1	1	7.36966e-29	4	Gpx3
Myl11	2.10692e-32	0.933563	1	0.852	3.31398e-28	4	Myl1
Mybphl1	9.85205e-31	1.09365	1	0.532	1.54963e-26	4	Mybphl
Cacna2d21	3.39254e-30	0.909047	0.846	0.282	5.33613e-26	4	Cacna2d2
Mgmt1	5.56936e-30	0.904603	0.969	0.463	8.76005e-26	4	Mgmt
Myl41	9.487e-30	1.11274	1	1	1.49221e-25	4	Myl4
Cpne52	4.24465e-29	0.881229	0.892	0.317	6.67641e-25	4	Cpne5
Myl71	1.44642e-28	1.35547	1	1	2.27508e-24	4	Myl7
Gnao11	2.94921e-28	0.882378	0.985	0.523	4.63881e-24	4	Gnao1
Ephx4	3.07321e-28	0.502977	0.508	0.087	4.83385e-24	4	Ephx4
Tbx51	5.3423e-28	0.778504	0.985	0.475	8.40291e-24	4	Tbx5
Gja51	1.09491e-27	0.952507	1	0.684	1.72218e-23	4	Gja5
Lad1	2.06003e-27	0.785366	0.815	0.28	3.24022e-23	4	Lad1
Myh61	3.16325e-27	0.626938	1	1	4.97548e-23	4	Myh6
Csrp2	2.07877e-26	0.760584	1	0.998	3.26969e-22	4	Csrp2
Dkk31	3.19404e-26	0.915381	1	0.853	5.0239e-22	4	Dkk3
Nppb	3.97316e-26	0.981434	1	0.997	6.24938e-22	4	Nppb
Ank12	5.55137e-26	0.797516	1	0.896	8.73175e-22	4	Ank1
Vsnl11	9.69702e-26	0.815481	0.831	0.303	1.52524e-21	4	Vsnl1
Gsg1	2.71288e-25	0.385798	0.462	0.077	4.26709e-21	4	Gsg1
Npy1r	1.10784e-24	0.551848	0.723	0.205	1.74252e-20	4	Npy1r
Epha41	1.7795e-23	0.793207	0.954	0.498	2.79897e-19	4	Epha4
Myom2	2.21095e-23	0.680889	1	0.933	3.47761e-19	4	Myom2
Nrtn1	4.80802e-23	0.650382	1	0.848	7.56254e-19	4	Nrtn
Ryr31	9.38566e-23	0.604226	0.723	0.229	1.47627e-18	4	Ryr3
Zfp5791	6.17516e-22	0.818932	0.969	0.721	9.71291e-18	4	Zfp579
Ahsg	1.93652e-21	0.463136	0.754	0.229	3.04595e-17	4	Ahsg
Atp2a21	2.28911e-21	0.381356	1	1	3.60053e-17	4	Atp2a2
Adm2	4.63372e-21	0.711948	0.8	0.324	7.28838e-17	4	Adm
Cpox1	1.22732e-20	0.628414	0.969	0.605	1.93045e-16	4	Cpox
Kcnj51	1.38548e-20	0.694226	0.954	0.57	2.17921e-16	4	Kcnj5
C530008M17Rik1	2.86689e-20	0.640156	0.985	0.663	4.50934e-16	4	C530008M17Rik
Pgm51	3.38174e-20	0.542207	0.985	0.95	5.31914e-16	4	Pgm5
Lppr51	7.09286e-20	0.564536	0.615	0.184	1.11564e-15	4	Lppr5
Npr32	3.45846e-19	0.805315	0.969	0.748	5.43981e-15	4	Npr3
4930455G09Rik	3.62964e-19	0.473034	0.508	0.125	5.70907e-15	4	4930455G09Rik
Corin2	5.75442e-19	0.56948	1	0.844	9.05113e-15	4	Corin
Casq1	9.9883e-19	0.602675	1	0.992	1.57106e-14	4	Casq1
Myl91	1.13863e-18	0.35421	1	1	1.79095e-14	4	Myl9
Aif1l1	2.52768e-18	0.597067	0.969	0.677	3.97579e-14	4	Aif1l
Mest	5.49441e-18	0.50888	1	1	8.64216e-14	4	Mest
Thbs41	7.45635e-18	0.711919	0.954	0.597	1.17281e-13	4	Thbs4
Pla2g71	1.68309e-17	0.661634	0.815	0.407	2.64733e-13	4	Pla2g7
Pgam2	1.72951e-17	0.341196	1	1	2.72035e-13	4	Pgam2
Nr2f21	2.5817e-17	0.526166	1	0.701	4.06076e-13	4	Nr2f2
Tgm21	4.37511e-17	0.405585	1	0.998	6.88162e-13	4	Tgm2
Itga61	1.20922e-16	0.555713	0.985	0.879	1.90198e-12	4	Itga6
Nudt41	1.78473e-16	0.382688	1	1	2.80719e-12	4	Nudt4
Herpud1	2.64787e-16	0.482692	1	0.953	4.16483e-12	4	Herpud1
Angpt11	3.37075e-16	0.727074	0.877	0.467	5.30185e-12	4	Angpt1
Clu	3.7071e-16	0.720303	1	0.945	5.8309e-12	4	Clu
Tmx41	6.4102e-16	0.506173	0.985	0.883	1.00826e-11	4	Tmx4
Abcc81	8.02296e-16	0.514778	0.985	0.726	1.26193e-11	4	Abcc8
Camk1d1	2.26829e-15	0.526172	0.692	0.277	3.56779e-11	4	Camk1d
Shox2	2.83816e-15	0.419728	0.415	0.101	4.46414e-11	4	Shox2
Rgs6	2.95248e-15	0.356059	0.538	0.16	4.64395e-11	4	Rgs6
Mt31	3.03087e-15	0.613417	1	0.913	4.76726e-11	4	Mt3
Tmem1081	3.47161e-15	0.534213	0.954	0.606	5.46049e-11	4	Tmem108
Trim541	3.50864e-15	0.503576	0.723	0.298	5.51874e-11	4	Trim54
Fam49a2	4.98999e-15	0.552636	0.908	0.508	7.84875e-11	4	Fam49a
Cap2	8.79375e-15	0.439094	1	0.989	1.38317e-10	4	Cap2
Eng1	1.08954e-14	0.43277	1	0.993	1.71374e-10	4	Eng
Plvap2	1.18084e-14	0.668317	1	0.833	1.85735e-10	4	Plvap
Dok41	1.25569e-14	0.524039	0.938	0.793	1.97508e-10	4	Dok4
Etv11	1.51217e-14	0.550396	0.8	0.398	2.3785e-10	4	Etv1
Slc22a12	5.58137e-14	0.679279	0.846	0.449	8.77894e-10	4	Slc22a1
Trim111	5.65867e-14	0.479945	0.969	0.815	8.90051e-10	4	Trim11
4930481A15Rik	7.7876e-14	0.257642	0.369	0.087	1.22491e-09	4	4930481A15Rik
Lrrn2	1.28651e-13	0.553773	0.8	0.485	2.02356e-09	4	Lrrn2
Prkag2	1.90077e-13	0.419584	1	0.972	2.98972e-09	4	Prkag2
A2m1	3.34044e-13	0.414338	0.554	0.196	5.25417e-09	4	A2m
Kcnk3	5.73658e-13	0.398161	0.985	0.884	9.02306e-09	4	Kcnk3
Smpx1	6.0287e-13	0.329298	1	1	9.48255e-09	4	Smpx
Atp1a11	9.45385e-13	0.269414	1	1	1.487e-08	4	Atp1a1
Sytl2	9.72987e-13	0.430773	0.723	0.321	1.53041e-08	4	Sytl2
Nr2f11	1.20934e-12	0.555051	0.723	0.373	1.90216e-08	4	Nr2f1
Cmya5	1.27895e-12	0.440594	1	0.843	2.01167e-08	4	Cmya5
Ube2ql1	1.35909e-12	0.315397	0.415	0.118	2.13771e-08	4	Ube2ql1
Txlnb1	1.75054e-12	0.420508	0.969	0.817	2.75342e-08	4	Txlnb
Dbh1	2.88266e-12	0.399975	0.569	0.215	4.53413e-08	4	Dbh
Maged21	3.73596e-12	0.324328	1	1	5.87629e-08	4	Maged2
Svip	5.31419e-12	0.430364	0.662	0.292	8.35868e-08	4	Svip
Shisa2	5.41947e-12	0.551188	0.631	0.293	8.52429e-08	4	Shisa2
Rbpms	5.84104e-12	0.289878	1	0.999	9.18738e-08	4	Rbpms
Igfbp51	7.64182e-12	0.422138	1	0.936	1.20198e-07	4	Igfbp5
Arhgap311	1.4477e-11	0.378648	1	0.96	2.27709e-07	4	Arhgap31
Ppp1r13l	1.65912e-11	0.464144	0.938	0.762	2.60963e-07	4	Ppp1r13l
Obscn2	1.70325e-11	0.328635	1	0.999	2.67904e-07	4	Obscn
Rd3	1.93401e-11	0.328427	0.354	0.095	3.04201e-07	4	Rd3
Rasd1	2.62326e-11	0.307961	0.508	0.175	4.12613e-07	4	Rasd1
Adcy11	2.72133e-11	0.365143	0.6	0.24	4.28038e-07	4	Adcy1
Sall11	2.89953e-11	0.323276	0.523	0.189	4.56068e-07	4	Sall1
Uts2b1	3.76182e-11	0.289054	0.462	0.148	5.91697e-07	4	Uts2b
Hfe21	3.86985e-11	0.426101	0.938	0.626	6.08689e-07	4	Hfe2
Fras11	5.4607e-11	0.423642	0.908	0.588	8.58913e-07	4	Fras1
Slc39a81	7.02588e-11	0.365733	0.692	0.295	1.1051e-06	4	Slc39a8
Tmem1001	7.29269e-11	0.433852	0.769	0.412	1.14707e-06	4	Tmem100
Tppp1	7.94602e-11	0.38245	0.708	0.329	1.24983e-06	4	Tppp
Emcn1	7.98781e-11	0.416606	1	0.891	1.2564e-06	4	Emcn
Hrc1	1.04163e-10	0.380225	1	0.965	1.63838e-06	4	Hrc
Ctla2a1	1.09049e-10	0.451196	1	0.946	1.71523e-06	4	Ctla2a
Ica11	1.1752e-10	0.409048	0.754	0.4	1.84847e-06	4	Ica1
Lamb32	1.21328e-10	0.362307	0.754	0.359	1.90837e-06	4	Lamb3
Nt5c3	1.23178e-10	0.433912	0.969	0.805	1.93747e-06	4	Nt5c3
Cd24a	1.24988e-10	0.289045	0.969	0.806	1.96594e-06	4	Cd24a
Rasgef1b1	1.43183e-10	0.400839	0.769	0.402	2.25212e-06	4	Rasgef1b
Smad6	1.70713e-10	0.474382	0.954	0.715	2.68514e-06	4	Smad6
Tmem21	2.02729e-10	0.524411	0.892	0.674	3.18873e-06	4	Tmem2
Slc36a2	2.15483e-10	0.293084	0.477	0.167	3.38934e-06	4	Slc36a2
Atp1b11	2.29147e-10	0.267912	1	1	3.60426e-06	4	Atp1b1
Gng21	2.67973e-10	0.354614	1	0.953	4.21495e-06	4	Gng2
Ctsl1	2.91333e-10	0.285596	1	0.999	4.58238e-06	4	Ctsl
Col4a52	3.40572e-10	0.34086	1	0.957	5.35686e-06	4	Col4a5
Gsg1l	4.85156e-10	0.370065	0.754	0.387	7.63101e-06	4	Gsg1l
Fbxo321	5.34985e-10	0.413021	0.754	0.444	8.41477e-06	4	Fbxo32
Tcn2	5.35767e-10	0.33424	0.985	0.93	8.42709e-06	4	Tcn2
Tbc1d161	8.61298e-10	0.350889	0.969	0.916	1.35474e-05	4	Tbc1d16
Hebp1	9.42656e-10	0.351467	0.969	0.858	1.4827e-05	4	Hebp1
Fabp51	1.00203e-09	0.257442	1	1	1.5761e-05	4	Fabp5
Pla2g4e	1.04317e-09	0.294335	0.477	0.179	1.6408e-05	4	Pla2g4e
Igf21	1.08799e-09	0.256022	1	1	1.71131e-05	4	Igf2
Adamts191	1.16733e-09	0.420317	0.831	0.552	1.8361e-05	4	Adamts19
Acer21	1.26321e-09	0.383496	0.877	0.549	1.9869e-05	4	Acer2
Rfxank	1.70259e-09	0.441836	0.877	0.668	2.67801e-05	4	Rfxank
Sort11	2.81096e-09	0.353582	0.954	0.887	4.42136e-05	4	Sort1
Klhl41	3.01035e-09	0.440931	0.815	0.529	4.73498e-05	4	Klhl4
Dhrs7	3.14295e-09	0.327375	0.985	0.894	4.94354e-05	4	Dhrs7
Slc7a71	3.15682e-09	0.365543	0.631	0.29	4.96536e-05	4	Slc7a7
Arfgef11	4.91727e-09	0.371796	0.908	0.831	7.73438e-05	4	Arfgef1
F2r	5.6337e-09	0.341722	1	0.973	8.86124e-05	4	F2r
Pla2g12a	6.06027e-09	0.321334	0.985	0.921	9.53219e-05	4	Pla2g12a
Tek1	6.61035e-09	0.40142	0.954	0.855	0.000103974	4	Tek
Ednrb1	8.34105e-09	0.360168	0.877	0.587	0.000131196	4	Ednrb
Il27ra	8.59279e-09	0.255277	0.415	0.152	0.000135156	4	Il27ra
Parm1	9.16768e-09	0.330436	0.646	0.33	0.000144198	4	Parm1
Adam33	1.34351e-08	0.368415	0.646	0.332	0.000211321	4	Adam33
Palmd	1.54229e-08	0.360981	0.831	0.5	0.000242587	4	Palmd
E130308A19Rik	1.55423e-08	0.328649	0.523	0.236	0.000244464	4	E130308A19Rik
Adora1	1.72823e-08	0.325016	0.831	0.503	0.000271833	4	Adora1
Tshz1	1.74522e-08	0.38183	0.846	0.58	0.000274505	4	Tshz1
Wisp11	2.35254e-08	0.371773	0.877	0.656	0.000370031	4	Wisp1
Scn5a1	2.87231e-08	0.413235	1	0.866	0.000451786	4	Scn5a
Rps6ka21	2.8734e-08	0.41737	0.908	0.672	0.000451957	4	Rps6ka2
Slc16a121	3.13319e-08	0.292806	0.523	0.229	0.000492819	4	Slc16a12
Gaa	3.47295e-08	0.271474	1	0.99	0.00054626	4	Gaa
Adgrg6	4.26876e-08	0.356588	0.708	0.372	0.000671433	4	Adgrg6
Gprasp1	5.164e-08	0.36545	0.938	0.721	0.000812246	4	Gprasp1
Gpr1821	5.23696e-08	0.299591	0.692	0.357	0.000823721	4	Gpr182
Atp6v0e2	5.5691e-08	0.334249	0.831	0.553	0.000875963	4	Atp6v0e2
Tfpi1	5.82433e-08	0.272332	1	0.949	0.000916109	4	Tfpi
Ehbp1	6.72654e-08	0.317273	0.954	0.905	0.00105802	4	Ehbp1
Kcnmb4	7.10768e-08	0.303645	0.477	0.208	0.00111797	4	Kcnmb4
Palm	7.13388e-08	0.389606	0.923	0.777	0.00112209	4	Palm
Fry1	7.69605e-08	0.430117	0.908	0.839	0.00121051	4	Fry
Tbc1d1	1.16578e-07	0.323866	0.938	0.791	0.00183365	4	Tbc1d1
Slc25a26	1.20958e-07	0.368908	0.738	0.489	0.00190255	4	Slc25a26
Ece11	1.30149e-07	0.304097	0.985	0.916	0.00204711	4	Ece1
Nav2	1.73188e-07	0.361165	0.938	0.875	0.00272408	4	Nav2
Ccdc141	1.75319e-07	0.333706	0.877	0.647	0.0027576	4	Ccdc141
Trdn2	1.87808e-07	0.292837	0.846	0.556	0.00295404	4	Trdn
Plekha71	1.93625e-07	0.375828	0.877	0.726	0.00304553	4	Plekha7
Prr151	2.01668e-07	0.322333	0.462	0.204	0.00317203	4	Prr15
Cfh1	2.1371e-07	0.413359	0.831	0.584	0.00336144	4	Cfh
Ppp1r3c1	2.14232e-07	0.259057	1	0.992	0.00336966	4	Ppp1r3c
Trabd2b	2.568e-07	0.324912	0.631	0.343	0.0040392	4	Trabd2b
Cd151	3.32235e-07	0.258732	1	0.988	0.00522573	4	Cd151
Mdfi	3.96721e-07	0.313521	0.615	0.34	0.00624002	4	Mdfi
Tom1	4.62674e-07	0.336269	0.908	0.821	0.0072774	4	Tom1
Fam174b1	6.21811e-07	0.291383	0.985	0.886	0.00978047	4	Fam174b
Klhl231	6.36511e-07	0.254366	0.969	0.938	0.0100117	4	Klhl23
Rgs121	6.42371e-07	0.330991	0.892	0.734	0.0101039	4	Rgs12
Adam10	6.86721e-07	0.265404	0.985	0.967	0.0108014	4	Adam10
Mmrn21	6.90425e-07	0.319539	0.938	0.814	0.0108597	4	Mmrn2
Wipf31	7.13181e-07	0.312262	0.677	0.413	0.0112176	4	Wipf3
Entpd4	7.15773e-07	0.274076	0.985	0.889	0.0112584	4	Entpd4
Nfatc1	7.58679e-07	0.367073	0.785	0.49	0.0119333	4	Nfatc1
Ypel2	7.7025e-07	0.364606	0.923	0.785	0.0121153	4	Ypel2
Slc17a7	8.03676e-07	0.250065	0.292	0.101	0.012641	4	Slc17a7
Sms	8.60175e-07	0.287995	0.938	0.825	0.0135297	4	Sms
Oit31	8.96331e-07	0.328908	0.385	0.161	0.0140984	4	Oit3
Abhd41	9.30957e-07	0.287504	0.985	0.911	0.014643	4	Abhd4
Pcp4l11	9.41833e-07	0.294892	0.985	0.919	0.0148141	4	Pcp4l1
Ascc11	9.53873e-07	0.362202	0.877	0.762	0.0150035	4	Ascc1
Emilin21	1.03559e-06	0.300395	0.985	0.943	0.0162887	4	Emilin2
Slc37a1	1.13096e-06	0.265805	0.462	0.216	0.0177888	4	Slc37a1
Arl4d1	1.22037e-06	0.305974	0.585	0.321	0.0191952	4	Arl4d
Mboat2	1.31104e-06	0.290423	0.769	0.52	0.0206214	4	Mboat2
Gpc1	1.35102e-06	0.257174	0.985	0.978	0.0212502	4	Gpc1
Col23a12	1.82435e-06	0.267164	0.769	0.453	0.0286951	4	Col23a1
Hist3h2ba1	1.95061e-06	0.260003	0.385	0.161	0.0306812	4	Hist3h2ba
Spats2l	2.10216e-06	0.263312	0.938	0.767	0.0330649	4	Spats2l
Tnip1	2.29437e-06	0.299532	0.954	0.795	0.0360882	4	Tnip1
Kcnj11	2.33449e-06	0.296229	0.908	0.753	0.0367191	4	Kcnj11
BC022687	2.49086e-06	0.291134	0.446	0.216	0.0391788	4	BC022687
Efnb11	2.80589e-06	0.289802	0.954	0.758	0.0441338	4	Efnb1
2610042L04Rik	3.67148e-06	0.297618	0.585	0.328	0.0577486	4	2610042L04Rik
AI414108	3.81735e-06	0.289395	0.738	0.487	0.0600432	4	AI414108
Gcnt11	3.88365e-06	0.323062	0.815	0.557	0.0610859	4	Gcnt1
Car141	3.98616e-06	0.320942	0.938	0.801	0.0626982	4	Car14
9330158H04Rik1	4.01358e-06	0.274608	0.554	0.3	0.0631295	4	9330158H04Rik
Cacna1h1	4.43486e-06	0.333055	0.892	0.749	0.0697559	4	Cacna1h
Ctgf	4.48091e-06	0.256294	1	0.978	0.0704803	4	Ctgf
Tnk2	4.8369e-06	0.34418	0.877	0.704	0.0760796	4	Tnk2
Prrx2	5.17021e-06	0.330826	0.769	0.605	0.0813223	4	Prrx2
Dnajb5	5.4465e-06	0.320577	0.877	0.69	0.085668	4	Dnajb5
Nos3	6.89288e-06	0.290554	0.877	0.708	0.108418	4	Nos3
Sestd1	7.08547e-06	0.287396	0.785	0.583	0.111447	4	Sestd1
Rtn21	7.51105e-06	0.250167	0.862	0.644	0.118141	4	Rtn2
Daam2	8.68025e-06	0.286112	0.723	0.486	0.136532	4	Daam2
Plxnc11	8.9957e-06	0.257058	0.6	0.347	0.141493	4	Plxnc1
Enpep1	9.39674e-06	0.270467	0.662	0.38	0.147801	4	Enpep
Tie1	9.82674e-06	0.272702	0.954	0.916	0.154565	4	Tie1
Gbe11	1.02702e-05	0.294003	0.985	0.888	0.16154	4	Gbe1
Homer1	1.17826e-05	0.287927	0.846	0.668	0.185329	4	Homer1
Olfm11	1.3116e-05	0.273669	0.785	0.531	0.206301	4	Olfm1
Ccdc31	1.5441e-05	0.289654	0.662	0.412	0.242872	4	Ccdc3
Ppp3ca	1.73795e-05	0.27023	0.938	0.856	0.273362	4	Ppp3ca
Slco3a11	2.28188e-05	0.256211	0.708	0.451	0.358916	4	Slco3a1
Creb3l2	2.57959e-05	0.280782	0.615	0.382	0.405743	4	Creb3l2
Nr1d11	2.6714e-05	0.252252	0.677	0.415	0.420184	4	Nr1d1
Ipo11	2.98609e-05	0.271429	0.954	0.841	0.469682	4	Ipo11
Clcn3	3.13383e-05	0.257055	0.769	0.574	0.492919	4	Clcn3
Mdga1	3.22243e-05	0.28076	0.831	0.614	0.506856	4	Mdga1
Mtss1	3.43825e-05	0.283463	0.985	0.933	0.540802	4	Mtss1
Vldlr	3.61062e-05	0.284348	0.985	0.966	0.567915	4	Vldlr
Erlec1	5.65936e-05	0.258931	0.938	0.792	0.89016	4	Erlec1
Calcrl	6.17212e-05	0.251257	0.769	0.577	0.970812	4	Calcrl
Gngt2	6.78397e-05	0.282089	0.908	0.751	1	4	Gngt2
Sdf2l1	7.89345e-05	0.255453	0.754	0.53	1	4	Sdf2l1
Nedd4l1	0.000102063	0.255059	0.985	0.919	1	4	Nedd4l
Dsg21	0.00011054	0.276314	0.862	0.637	1	4	Dsg2
Adamts71	0.000130096	0.266943	0.831	0.609	1	4	Adamts7
Slc22a231	0.000142458	0.256515	0.569	0.365	1	4	Slc22a23
Gstk1	0.000151807	0.278785	0.754	0.558	1	4	Gstk1
Yipf71	0.000283885	0.255624	0.754	0.539	1	4	Yipf7
Epb4.1	0.000440385	0.259874	0.892	0.77	1	4	Epb4.1
Id21	0.000442595	0.273999	0.954	0.9	1	4	Id2
Clec14a	0.000644134	0.266277	0.892	0.814	1	4	Clec14a
Lmod1	2.56523e-59	1.5749	1	0.253	4.03485e-55	5	Lmod1
Prdm6	1.66992e-58	1.45088	0.984	0.233	2.62662e-54	5	Prdm6
Synpo2	6.7007e-58	1.17376	0.891	0.163	1.05395e-53	5	Synpo2
Map3k7cl	3.95592e-56	1.32986	0.953	0.202	6.22226e-52	5	Map3k7cl
Lgr6	6.0477e-56	0.633343	0.656	0.07	9.51243e-52	5	Lgr6
Clca3a2	2.3735e-55	1.51152	0.922	0.189	3.73328e-51	5	Clca3a2
Grp	3.81993e-54	1.6332	0.875	0.163	6.00837e-50	5	Grp
Ptprz1	6.05344e-54	1.11166	0.906	0.178	9.52145e-50	5	Ptprz1
Tnfrsf11b	2.84307e-50	0.870653	0.812	0.133	4.47187e-46	5	Tnfrsf11b
Efhd1	7.13381e-48	0.594428	0.609	0.073	1.12208e-43	5	Efhd1
Colec10	2.92926e-47	0.706597	0.609	0.074	4.60744e-43	5	Colec10
Ace	5.3786e-44	1.8199	1	0.484	8.45999e-40	5	Ace
Myh11	8.93498e-44	1.77019	1	0.484	1.40538e-39	5	Myh11
Tmem82	1.58583e-43	0.82915	0.672	0.106	2.49435e-39	5	Tmem82
Timp4	1.81753e-43	1.30323	0.953	0.289	2.85879e-39	5	Timp4
Nupr1	2.81412e-43	1.68227	1	0.493	4.42633e-39	5	Nupr1
Itga8	4.52955e-43	1.73094	1	0.562	7.12452e-39	5	Itga8
Sost	1.25367e-42	2.30204	1	0.573	1.97189e-38	5	Sost
Tub	1.1498e-41	0.93622	0.781	0.162	1.80851e-37	5	Tub
Fbln5	3.93292e-41	2.43026	1	0.958	6.18609e-37	5	Fbln5
Eln	8.67743e-41	2.49894	1	1	1.36487e-36	5	Eln
Fblim1	8.78343e-41	1.66408	1	0.928	1.38155e-36	5	Fblim1
Fstl3	1.45086e-40	1.47988	1	0.598	2.28206e-36	5	Fstl3
Heyl	2.7142e-40	1.47099	1	0.574	4.26916e-36	5	Heyl
Tagln	2.83974e-40	2.25168	1	0.846	4.46663e-36	5	Tagln
Ntrk3	3.96663e-40	0.888089	0.828	0.192	6.23911e-36	5	Ntrk3
Acta2	4.04698e-40	1.45028	1	1	6.36549e-36	5	Acta2
Flna	5.8007e-40	1.33131	1	0.999	9.12393e-36	5	Flna
Ltbp4	8.90789e-40	1.29568	1	0.999	1.40112e-35	5	Ltbp4
Sod3	8.98563e-40	1.26049	0.969	0.348	1.41335e-35	5	Sod3
Nov	9.31129e-40	1.56725	1	0.813	1.46457e-35	5	Nov
Gpc6	1.03851e-39	1.47991	1	0.698	1.63347e-35	5	Gpc6
Myl6	1.36627e-39	0.919412	1	1	2.14901e-35	5	Myl6
Kcnab1	1.52323e-39	0.620246	0.594	0.086	2.3959e-35	5	Kcnab1
Pkdcc	1.6805e-39	1.26511	1	0.99	2.64326e-35	5	Pkdcc
Slc25a34	2.2714e-39	0.451029	0.469	0.049	3.57269e-35	5	Slc25a34
Pls3	2.74612e-39	1.40936	1	0.882	4.31937e-35	5	Pls3
Kank1	7.35435e-39	1.11619	1	0.843	1.15677e-34	5	Kank1
Map6	9.20072e-39	0.822574	0.719	0.143	1.44718e-34	5	Map6
Pdgfrl	1.49689e-38	1.24827	1	0.464	2.35446e-34	5	Pdgfrl
Tpm2	2.04605e-38	1.16335	1	0.993	3.21823e-34	5	Tpm2
Adamts2	2.20111e-38	1.42529	1	0.784	3.46213e-34	5	Adamts2
Sfrp2	2.67587e-38	1.74049	1	0.816	4.20888e-34	5	Sfrp2
Osr1	2.6873e-38	1.275	1	0.431	4.22686e-34	5	Osr1
Cxcl12	4.08361e-38	1.63628	1	0.944	6.42311e-34	5	Cxcl12
Zyx	5.15611e-38	0.912922	1	0.999	8.11005e-34	5	Zyx
Loxl1	5.63898e-38	1.38999	1	0.946	8.86955e-34	5	Loxl1
Fstl1	6.87099e-38	1.25445	1	1	1.08074e-33	5	Fstl1
Hmgcs2	1.60765e-37	1.04615	0.766	0.18	2.52868e-33	5	Hmgcs2
Pmepa1	2.4772e-37	1.20672	1	0.885	3.8964e-33	5	Pmepa1
Id3	5.73291e-37	1.00408	1	1	9.0173e-33	5	Id3
Myh10	6.15725e-37	1.00944	1	0.997	9.68474e-33	5	Myh10
Actn1	6.71848e-37	1.20263	1	0.954	1.05675e-32	5	Actn1
Angptl2	7.32414e-37	1.01678	1	0.977	1.15201e-32	5	Angptl2
Hspg2	7.65669e-37	0.735236	1	1	1.20432e-32	5	Hspg2
Fhl1	8.46578e-37	1.03515	1	0.999	1.33158e-32	5	Fhl1
Tmem158	9.27116e-37	1.42684	0.984	0.586	1.45826e-32	5	Tmem158
Mgp	9.36265e-37	1.39141	1	1	1.47265e-32	5	Mgp
Ltbp2	9.8383e-37	1.31315	1	0.503	1.54747e-32	5	Ltbp2
Csrp1	1.03769e-36	0.951534	1	0.994	1.63219e-32	5	Csrp1
Tmsb4x	1.08712e-36	0.776547	1	1	1.70993e-32	5	Tmsb4x
Lox	1.10913e-36	1.569	1	0.838	1.74456e-32	5	Lox
Igfbp7	1.31321e-36	1.22336	1	0.985	2.06555e-32	5	Igfbp7
Cald1	1.61092e-36	1.07782	1	0.949	2.53381e-32	5	Cald1
Ptgis	3.12894e-36	1.20641	1	0.771	4.92151e-32	5	Ptgis
Fzd1	3.5241e-36	1.11338	1	0.782	5.54305e-32	5	Fzd1
Tm4sf11	4.84688e-36	1.31074	1	0.967	7.62366e-32	5	Tm4sf1
Olfml2b	5.92385e-36	1.04558	1	0.927	9.31762e-32	5	Olfml2b
Bgn	7.30901e-36	1.45654	1	0.996	1.14963e-31	5	Bgn
Synpo	1.05496e-35	1.2055	1	0.721	1.65935e-31	5	Synpo
Antxr1	1.19615e-35	1.24895	1	0.764	1.88143e-31	5	Antxr1
Glipr1	1.31692e-35	0.551138	0.594	0.095	2.07138e-31	5	Glipr1
Fbln2	1.62835e-35	1.46577	1	0.981	2.56124e-31	5	Fbln2
Stac	1.70322e-35	0.36523	0.391	0.037	2.67899e-31	5	Stac
Ltbp3	2.43429e-35	1.16199	1	0.956	3.8289e-31	5	Ltbp3
Cpe	2.80609e-35	0.756435	1	1	4.41369e-31	5	Cpe
C1qtnf2	3.50698e-35	0.950399	0.875	0.265	5.51613e-31	5	C1qtnf2
Crispld2	4.4688e-35	0.85141	0.812	0.213	7.02898e-31	5	Crispld2
Angpt2	1.41912e-34	0.958284	0.938	0.328	2.23213e-30	5	Angpt2
Aoc3	1.8133e-34	1.27654	0.984	0.714	2.85214e-30	5	Aoc3
Mfap4	1.97419e-34	1.42443	1	0.919	3.1052e-30	5	Mfap4
Galnt16	2.31353e-34	1.14332	1	0.573	3.63896e-30	5	Galnt16
Vim	2.41092e-34	0.821086	1	1	3.79213e-30	5	Vim
Htra1	2.71229e-34	1.26269	1	0.922	4.26617e-30	5	Htra1
Pi15	2.74436e-34	1.35651	0.969	0.421	4.3166e-30	5	Pi15
Hotairm1	5.64935e-34	0.765027	0.703	0.149	8.88586e-30	5	Hotairm1
Mmp23	9.51117e-34	1.05117	1	0.811	1.49601e-29	5	Mmp23
Cd200	1.31909e-33	1.16927	0.953	0.492	2.0748e-29	5	Cd200
Sema3f	1.61431e-33	1.08827	0.969	0.513	2.53915e-29	5	Sema3f
Cnn2	1.80389e-33	0.750295	1	0.999	2.83733e-29	5	Cnn2
Alcam	3.68635e-33	1.15537	0.984	0.581	5.79826e-29	5	Alcam
EYFP	3.79515e-33	1.16405	0.906	0.35	5.9694e-29	5	EYFP
Cnn1	4.85861e-33	0.934734	1	0.955	7.64211e-29	5	Cnn1
Fbn1	6.10782e-33	1.07636	1	0.993	9.60699e-29	5	Fbn1
Stx1a	6.71535e-33	1.01083	0.938	0.413	1.05626e-28	5	Stx1a
Art4	6.85067e-33	0.875991	0.891	0.276	1.07754e-28	5	Art4
Csrp21	7.11483e-33	0.940481	1	0.998	1.11909e-28	5	Csrp2
Lhfp	1.08932e-32	0.857876	1	0.966	1.7134e-28	5	Lhfp
Plekhg3	1.44637e-32	1.0902	0.984	0.591	2.27499e-28	5	Plekhg3
Prss35	1.96459e-32	0.840709	0.844	0.233	3.09011e-28	5	Prss35
Pkd1	1.97235e-32	1.04063	1	0.882	3.10231e-28	5	Pkd1
Ltbp1	2.62144e-32	0.996682	1	0.896	4.12326e-28	5	Ltbp1
Jag1	3.95367e-32	1.18718	0.984	0.621	6.21872e-28	5	Jag1
Ntf3	5.47654e-32	0.61206	0.734	0.172	8.61406e-28	5	Ntf3
Notch3	5.7015e-32	0.993356	1	0.687	8.96788e-28	5	Notch3
Sparc	8.48494e-32	0.854465	1	1	1.3346e-27	5	Sparc
Spon1	1.47171e-31	0.999592	1	0.93	2.31485e-27	5	Spon1
Fn1	1.79181e-31	0.88126	1	1	2.81834e-27	5	Fn1
Myl12a	1.8447e-31	0.458	1	1	2.90153e-27	5	Myl12a
Psd	1.94834e-31	0.816958	0.734	0.185	3.06455e-27	5	Psd
Actg2	2.48471e-31	1.15439	0.969	0.442	3.90821e-27	5	Actg2
Agrn	3.62212e-31	0.73103	1	0.998	5.69724e-27	5	Agrn
Wscd2	3.65011e-31	0.714122	0.641	0.133	5.74126e-27	5	Wscd2
Ptrf	4.40906e-31	0.593581	1	1	6.93502e-27	5	Ptrf
Ilk	6.44507e-31	0.559973	1	1	1.01374e-26	5	Ilk
Kcnip4	7.3399e-31	0.492229	0.344	0.034	1.15449e-26	5	Kcnip4
Plxdc2	1.0875e-30	0.979154	0.984	0.505	1.71053e-26	5	Plxdc2
Gem	1.80292e-30	0.898903	0.797	0.236	2.83581e-26	5	Gem
Specc1	2.55568e-30	0.825206	0.906	0.328	4.01983e-26	5	Specc1
Col4a1	3.16067e-30	0.498053	1	1	4.97142e-26	5	Col4a1
Ppic	3.34548e-30	0.749164	1	0.994	5.26211e-26	5	Ppic
Actb	3.39649e-30	0.770895	1	1	5.34234e-26	5	Actb
Lgals1	3.90945e-30	0.771525	1	1	6.14918e-26	5	Lgals1
Cebpd	4.31023e-30	0.98755	0.984	0.762	6.77956e-26	5	Cebpd
Lmna	4.76104e-30	0.74533	1	0.993	7.48864e-26	5	Lmna
Cav1	5.02564e-30	0.739846	1	0.999	7.90483e-26	5	Cav1
Il11ra1	5.42846e-30	0.93903	1	0.823	8.53842e-26	5	Il11ra1
Anxa5	6.86281e-30	0.588373	1	1	1.07945e-25	5	Anxa5
Pxdn	9.11871e-30	0.61124	1	0.997	1.43428e-25	5	Pxdn
Sntg2	1.15153e-29	0.398966	0.484	0.072	1.81124e-25	5	Sntg2
Tsc22d1	1.85821e-29	0.716927	1	1	2.92277e-25	5	Tsc22d1
Actg1	3.10724e-29	0.519742	1	1	4.88738e-25	5	Actg1
Rbp11	3.28183e-29	0.835204	1	0.989	5.162e-25	5	Rbp1
Amigo21	5.02408e-29	0.7604	0.844	0.264	7.90238e-25	5	Amigo2
Rcn3	6.99692e-29	0.827483	1	0.995	1.10055e-24	5	Rcn3
Pcolce2	8.3944e-29	0.770561	0.75	0.201	1.32035e-24	5	Pcolce2
Itgb1	9.00519e-29	0.461036	1	1	1.41643e-24	5	Itgb1
Btg1	1.04512e-28	0.729184	1	0.988	1.64387e-24	5	Btg1
Plac9b	1.19954e-28	0.924336	1	0.582	1.88676e-24	5	Plac9b
Rgs4	1.31915e-28	0.707352	0.75	0.204	2.07488e-24	5	Rgs4
H3f3b	1.59388e-28	0.544123	1	1	2.50701e-24	5	H3f3b
S100a111	1.75943e-28	0.637273	1	1	2.76741e-24	5	S100a11
Itga9	2.83491e-28	0.932109	0.984	0.757	4.45903e-24	5	Itga9
Lmo1	3.01818e-28	0.567718	0.672	0.152	4.7473e-24	5	Lmo1
Rarres21	3.90225e-28	0.97514	1	0.849	6.13785e-24	5	Rarres2
Col6a3	3.98802e-28	0.938648	1	0.979	6.27276e-24	5	Col6a3
Sepp1	4.44959e-28	0.771796	1	0.993	6.99876e-24	5	Sepp1
Gxylt2	4.52961e-28	0.819364	0.75	0.219	7.12463e-24	5	Gxylt2
Itga4	5.24567e-28	0.726403	0.734	0.196	8.25091e-24	5	Itga4
Map1b	5.74711e-28	0.881203	0.984	0.904	9.03962e-24	5	Map1b
Ppp1r14a	6.88763e-28	0.85149	0.984	0.735	1.08335e-23	5	Ppp1r14a
Vasn	1.25842e-27	0.86702	1	0.762	1.97937e-23	5	Vasn
Dkk32	1.60414e-27	0.99654	1	0.853	2.52315e-23	5	Dkk3
Smtn	1.61589e-27	0.650391	1	0.995	2.54163e-23	5	Smtn
5930403L14Rik	1.77402e-27	0.927922	0.906	0.413	2.79036e-23	5	5930403L14Rik
Cspg4	1.79184e-27	0.840459	0.984	0.909	2.81838e-23	5	Cspg4
Megf61	1.81878e-27	0.965838	1	0.842	2.86077e-23	5	Megf6
Eva1b	1.88193e-27	0.834855	1	0.894	2.96008e-23	5	Eva1b
Tmem26	2.02462e-27	0.699647	0.766	0.222	3.18453e-23	5	Tmem26
Snhg181	2.17901e-27	0.758627	1	0.954	3.42736e-23	5	Snhg18
Mxra8	2.39906e-27	0.765732	1	0.894	3.77348e-23	5	Mxra8
Ccdc80	2.83799e-27	0.874685	1	0.941	4.46388e-23	5	Ccdc80
Syt15	4.57101e-27	0.353351	0.344	0.039	7.18974e-23	5	Syt15
Emilin1	4.65068e-27	0.730081	1	0.974	7.31506e-23	5	Emilin1
Acan	6.39239e-27	0.531462	1	0.523	1.00546e-22	5	Acan
Tnc	7.41707e-27	0.943955	1	0.816	1.16663e-22	5	Tnc
Lama5	7.91786e-27	0.832954	1	0.931	1.2454e-22	5	Lama5
Arpc1b	8.57353e-27	0.650342	1	0.991	1.34853e-22	5	Arpc1b
Mylk	1.15806e-26	0.934542	0.938	0.509	1.82152e-22	5	Mylk
Selm	1.25695e-26	0.554978	1	0.999	1.97706e-22	5	Selm
Stom	1.31541e-26	0.968729	0.984	0.743	2.06901e-22	5	Stom
Prkcdbp	1.48801e-26	0.737809	1	0.966	2.3405e-22	5	Prkcdbp
Tpm4	1.57892e-26	0.629372	1	0.994	2.48348e-22	5	Tpm4
Col14a1	1.59996e-26	0.970662	1	0.889	2.51658e-22	5	Col14a1
Frzb	1.88561e-26	0.998461	0.938	0.516	2.96587e-22	5	Frzb
Itgb3	1.94059e-26	0.82277	0.844	0.328	3.05236e-22	5	Itgb3
Trim471	2.63109e-26	0.697815	1	0.982	4.13844e-22	5	Trim47
Plb1	2.99168e-26	0.579412	0.594	0.128	4.70561e-22	5	Plb1
Serpinh1	3.94724e-26	0.576783	1	1	6.20861e-22	5	Serpinh1
Cyb561	4.65817e-26	0.638658	0.797	0.245	7.32684e-22	5	Cyb561
Slit31	5.2441e-26	0.921493	0.922	0.497	8.24844e-22	5	Slit3
Slc1a4	7.0518e-26	0.810379	0.969	0.48	1.10918e-21	5	Slc1a4
Islr	8.28476e-26	0.913333	1	0.644	1.30311e-21	5	Islr
Thsd4	1.02538e-25	0.97351	0.906	0.521	1.61282e-21	5	Thsd4
Mmp2	1.31479e-25	0.722335	1	0.994	2.06803e-21	5	Mmp2
Adamts10	1.43229e-25	0.761024	0.969	0.794	2.25284e-21	5	Adamts10
Pi16	1.61569e-25	0.780358	0.891	0.339	2.54132e-21	5	Pi16
Calu	1.73658e-25	0.462103	1	1	2.73147e-21	5	Calu
Kazald1	1.79073e-25	0.772575	0.859	0.304	2.81665e-21	5	Kazald1
Ckap4	2.19807e-25	0.617948	1	0.995	3.45735e-21	5	Ckap4
Psap	2.80988e-25	0.396226	1	1	4.41966e-21	5	Psap
Col5a1	3.7397e-25	0.701217	1	1	5.88217e-21	5	Col5a1
Sulf11	4.00511e-25	0.834229	0.984	0.745	6.29964e-21	5	Sulf1
Gpc4	4.02054e-25	0.771589	1	0.813	6.32391e-21	5	Gpc4
Gkn3	4.107e-25	0.768314	0.484	0.091	6.4599e-21	5	Gkn3
Col1a2	4.32936e-25	0.918612	1	1	6.80965e-21	5	Col1a2
Col24a1	4.6217e-25	0.652227	0.641	0.163	7.26947e-21	5	Col24a1
Tmem132a	4.70673e-25	0.721355	1	0.952	7.40321e-21	5	Tmem132a
Gm13889	4.79575e-25	0.930959	0.969	0.76	7.54323e-21	5	Gm13889
Emp3	4.94062e-25	0.766981	1	0.9	7.7711e-21	5	Emp3
Chpf	6.14152e-25	0.721921	1	0.916	9.66e-21	5	Chpf
Ctgf1	6.85444e-25	0.83246	1	0.978	1.07813e-20	5	Ctgf
Mir143hg	7.43371e-25	0.932164	0.969	0.679	1.16925e-20	5	Mir143hg
Gucy1a31	8.44592e-25	0.796133	0.984	0.789	1.32846e-20	5	Gucy1a3
Adgrl2	9.42454e-25	0.659162	1	0.899	1.48239e-20	5	Adgrl2
Qsox1	1.35962e-24	0.748243	0.984	0.857	2.13854e-20	5	Qsox1
Crip1	1.45497e-24	0.533624	1	1	2.28852e-20	5	Crip1
Ptms	1.83827e-24	0.398792	1	1	2.89142e-20	5	Ptms
P4hb	1.863e-24	0.611513	1	1	2.93032e-20	5	P4hb
Kcnmb1	2.90697e-24	0.484185	0.453	0.079	4.57238e-20	5	Kcnmb1
Mfap5	3.23345e-24	0.965367	1	0.902	5.08589e-20	5	Mfap5
Scarf2	3.2945e-24	0.821384	0.984	0.759	5.18193e-20	5	Scarf2
Fkbp10	3.64537e-24	0.670852	1	0.957	5.7338e-20	5	Fkbp10
Lrp1	3.94953e-24	0.81028	1	0.859	6.21222e-20	5	Lrp1
Arhgef25	4.32737e-24	0.759861	0.969	0.786	6.80652e-20	5	Arhgef25
P3h3	4.94619e-24	0.789757	0.984	0.875	7.77986e-20	5	P3h3
Chst2	7.05716e-24	0.787577	0.859	0.378	1.11002e-19	5	Chst2
Adamts15	7.96129e-24	0.872403	0.922	0.463	1.25223e-19	5	Adamts15
Serpine1	1.12254e-23	0.626142	0.688	0.2	1.76564e-19	5	Serpine1
Cdo1	1.71977e-23	0.741974	0.906	0.389	2.70503e-19	5	Cdo1
Cd63	1.73979e-23	0.467968	1	1	2.73652e-19	5	Cd63
Atp10a	2.23917e-23	0.664792	0.719	0.221	3.52199e-19	5	Atp10a
Timp2	2.50385e-23	0.624208	1	0.993	3.93831e-19	5	Timp2
Lmcd1	2.68698e-23	0.82001	0.969	0.86	4.22636e-19	5	Lmcd1
Rrbp1	3.70221e-23	0.547761	1	0.996	5.8232e-19	5	Rrbp1
Pdlim3	4.31711e-23	0.823408	1	0.955	6.79038e-19	5	Pdlim3
Col5a2	6.38732e-23	0.691931	1	0.995	1.00466e-18	5	Col5a2
C1qtnf6	7.08722e-23	0.57167	1	0.985	1.11475e-18	5	C1qtnf6
Mfap2	7.32704e-23	0.743902	1	0.979	1.15247e-18	5	Mfap2
Kctd12	7.78311e-23	0.695095	1	0.891	1.2242e-18	5	Kctd12
Endod1	7.85936e-23	0.825554	0.844	0.424	1.2362e-18	5	Endod1
Sdc1	8.68832e-23	0.754093	0.969	0.785	1.36659e-18	5	Sdc1
Cck	8.69323e-23	0.559225	0.359	0.053	1.36736e-18	5	Cck
Rasl11a	9.39044e-23	0.721655	0.781	0.296	1.47702e-18	5	Rasl11a
Pdlim7	9.96259e-23	0.537816	1	0.996	1.56702e-18	5	Pdlim7
Arpc2	1.21337e-22	0.44941	1	1	1.9085e-18	5	Arpc2
App	1.40788e-22	0.488194	1	1	2.21445e-18	5	App
Cfl1	1.46449e-22	0.354905	1	1	2.3035e-18	5	Cfl1
Efnb2	1.89076e-22	0.860707	0.891	0.617	2.97398e-18	5	Efnb2
Cabin1	2.13285e-22	0.626565	1	0.872	3.35475e-18	5	Cabin1
Efemp2	3.3686e-22	0.69773	1	0.884	5.29847e-18	5	Efemp2
Vcl	3.46989e-22	0.531886	1	0.999	5.45779e-18	5	Vcl
Hmgn1	3.80208e-22	0.362403	1	1	5.98029e-18	5	Hmgn1
Fbln11	4.03211e-22	0.994451	0.969	0.672	6.3421e-18	5	Fbln1
Dynll1	5.70866e-22	0.320477	1	1	8.97916e-18	5	Dynll1
Thbs2	5.79634e-22	0.730569	1	0.813	9.11706e-18	5	Thbs2
Cd34	5.80123e-22	0.685287	1	0.986	9.12476e-18	5	Cd34
Foxc2	6.44455e-22	0.78156	0.828	0.361	1.01366e-17	5	Foxc2
Rras	8.07897e-22	0.539824	1	0.993	1.27074e-17	5	Rras
Cercam	1.22464e-21	0.851827	0.906	0.567	1.92623e-17	5	Cercam
Id4	1.56168e-21	0.617551	0.609	0.167	2.45636e-17	5	Id4
Tagln2	1.6312e-21	0.515108	1	1	2.56571e-17	5	Tagln2
Adamts1	1.76121e-21	0.736498	1	0.88	2.77021e-17	5	Adamts1
Pmp22	1.8454e-21	0.674133	1	0.951	2.90263e-17	5	Pmp22
Syt11	1.96563e-21	0.650964	0.828	0.339	3.09174e-17	5	Syt11
Sidt2	2.46043e-21	0.617166	1	0.886	3.87e-17	5	Sidt2
Pamr1	2.57076e-21	0.678648	0.797	0.273	4.04354e-17	5	Pamr1
F2rl1	2.88194e-21	0.473089	0.375	0.062	4.533e-17	5	F2rl1
Galnt2	3.13407e-21	0.652144	1	0.941	4.92958e-17	5	Galnt2
Sec61b	3.42151e-21	0.529514	1	0.998	5.38169e-17	5	Sec61b
Myadm	3.47317e-21	0.424338	1	0.999	5.46295e-17	5	Myadm
Sh3bgrl	3.69582e-21	0.65366	1	0.938	5.81315e-17	5	Sh3bgrl
Tln1	3.70352e-21	0.459946	1	0.999	5.82526e-17	5	Tln1
Cdh3	4.23244e-21	0.759452	0.953	0.603	6.65721e-17	5	Cdh3
Ptma	4.78938e-21	0.391692	1	1	7.53321e-17	5	Ptma
Col1a1	5.64979e-21	0.757371	1	1	8.88656e-17	5	Col1a1
Lamb2	5.72593e-21	0.508966	1	0.997	9.00631e-17	5	Lamb2
Gabarap	5.83905e-21	0.376731	1	1	9.18424e-17	5	Gabarap
Dnajc10	6.42195e-21	0.558466	1	0.968	1.01011e-16	5	Dnajc10
Ppap2a	6.50945e-21	0.632296	0.984	0.894	1.02387e-16	5	Ppap2a
Cnn3	8.04349e-21	0.445858	1	0.999	1.26516e-16	5	Cnn3
Htra3	8.89119e-21	0.733802	0.984	0.831	1.3985e-16	5	Htra3
Cmklr1	1.09242e-20	0.413119	0.5	0.109	1.71827e-16	5	Cmklr1
Nfix	1.10796e-20	0.652586	0.984	0.764	1.7427e-16	5	Nfix
Cst3	1.15657e-20	0.420603	1	1	1.81917e-16	5	Cst3
Axl	1.45608e-20	0.626672	1	0.923	2.29026e-16	5	Axl
2310022B05Rik	1.55681e-20	0.470396	1	1	2.44871e-16	5	2310022B05Rik
Arhgdia	1.63459e-20	0.408436	1	1	2.57105e-16	5	Arhgdia
Tenm3	1.64629e-20	0.786357	0.875	0.455	2.58945e-16	5	Tenm3
Sdc3	1.74956e-20	0.657208	0.969	0.889	2.75188e-16	5	Sdc3
Iqgap1	1.82784e-20	0.56861	1	0.94	2.87501e-16	5	Iqgap1
Fam129b	1.83358e-20	0.635815	1	0.91	2.88403e-16	5	Fam129b
Lpp	2.02653e-20	0.578484	1	0.929	3.18753e-16	5	Lpp
Snx18	2.18667e-20	0.690318	0.969	0.774	3.43941e-16	5	Snx18
Fam13c	2.65608e-20	0.600208	0.828	0.327	4.17775e-16	5	Fam13c
Vkorc1	2.89728e-20	0.561954	1	0.967	4.55713e-16	5	Vkorc1
Rhoc	3.41386e-20	0.464727	1	0.999	5.36966e-16	5	Rhoc
Myh9	3.55249e-20	0.622457	0.984	0.918	5.58771e-16	5	Myh9
Pfn1	6.76263e-20	0.314466	1	1	1.06369e-15	5	Pfn1
Fgfr1	8.37859e-20	0.653131	1	0.849	1.31787e-15	5	Fgfr1
Npdc1	8.68191e-20	0.681371	0.969	0.76	1.36558e-15	5	Npdc1
Crtap	9.58372e-20	0.491517	1	0.99	1.50742e-15	5	Crtap
Rcn1	9.70609e-20	0.509126	1	0.989	1.52667e-15	5	Rcn1
Eef2k	1.13137e-19	0.675284	0.969	0.804	1.77953e-15	5	Eef2k
Foxs1	1.16626e-19	0.606525	0.75	0.277	1.83441e-15	5	Foxs1
Nrgn	1.16847e-19	0.503544	0.562	0.147	1.83789e-15	5	Nrgn
Calm1	1.4994e-19	0.400227	1	1	2.35841e-15	5	Calm1
Rpn2	2.34427e-19	0.432315	1	1	3.6873e-15	5	Rpn2
Rhoj	2.46685e-19	0.595375	1	0.781	3.88011e-15	5	Rhoj
Rexo2	2.84577e-19	0.555035	1	0.937	4.47611e-15	5	Rexo2
Rhbdf1	4.6202e-19	0.611095	0.984	0.85	7.26712e-15	5	Rhbdf1
Ctdsp2	4.88324e-19	0.456604	1	0.999	7.68085e-15	5	Ctdsp2
Mrc2	4.89142e-19	0.656625	1	0.698	7.69371e-15	5	Mrc2
Efna5	6.75295e-19	0.781289	0.922	0.661	1.06217e-14	5	Efna5
Nid2	7.67175e-19	0.503012	1	0.981	1.20669e-14	5	Nid2
Cav2	7.75333e-19	0.694628	0.938	0.745	1.21952e-14	5	Cav2
Col6a1	8.79126e-19	0.533444	1	0.996	1.38278e-14	5	Col6a1
Coro1c	9.43799e-19	0.567107	1	0.925	1.4845e-14	5	Coro1c
Kdelr3	9.48016e-19	0.654152	1	0.897	1.49113e-14	5	Kdelr3
Dap	1.34891e-18	0.567821	1	0.93	2.1217e-14	5	Dap
Il6st	1.38628e-18	0.559318	1	0.946	2.18048e-14	5	Il6st
Myof	1.48815e-18	0.648495	0.844	0.402	2.34071e-14	5	Myof
H1f0	1.68549e-18	0.436259	1	0.999	2.65111e-14	5	H1f0
Abcc1	2.01096e-18	0.55797	0.688	0.243	3.16304e-14	5	Abcc1
Foxc1	2.0277e-18	0.690921	0.906	0.567	3.18937e-14	5	Foxc1
P4ha3	2.14722e-18	0.809953	0.891	0.617	3.37737e-14	5	P4ha3
Zdhhc14	2.47873e-18	0.526426	0.594	0.183	3.8988e-14	5	Zdhhc14
Lrig3	2.7241e-18	0.555292	0.547	0.152	4.28474e-14	5	Lrig3
Hoxa3	2.91711e-18	0.448882	0.625	0.178	4.58833e-14	5	Hoxa3
Igfbp21	3.1131e-18	0.846155	0.938	0.624	4.89659e-14	5	Igfbp2
Col4a2	3.14783e-18	0.329302	1	1	4.95121e-14	5	Col4a2
Pde5a	3.4736e-18	0.782238	0.812	0.441	5.46362e-14	5	Pde5a
Casp12	3.79128e-18	0.468459	0.672	0.224	5.9633e-14	5	Casp12
Cd248	3.8649e-18	0.579015	0.969	0.68	6.07911e-14	5	Cd248
Nid1	3.90315e-18	0.518989	1	0.991	6.13926e-14	5	Nid1
Nxn	4.93443e-18	0.698858	0.953	0.802	7.76137e-14	5	Nxn
Tpst1	5.13522e-18	0.661122	0.969	0.713	8.07719e-14	5	Tpst1
Glt8d2	5.33977e-18	0.55281	0.703	0.245	8.39892e-14	5	Glt8d2
Nfic	5.86711e-18	0.538852	0.984	0.911	9.22837e-14	5	Nfic
Oat	6.10117e-18	0.429636	1	0.999	9.59653e-14	5	Oat
Sdc2	6.36822e-18	0.560939	0.984	0.824	1.00166e-13	5	Sdc2
Gucy1b3	6.38056e-18	0.577011	0.938	0.783	1.0036e-13	5	Gucy1b3
Capn2	6.68028e-18	0.562197	1	0.949	1.05074e-13	5	Capn2
Anxa1	6.80015e-18	0.54554	0.984	0.79	1.0696e-13	5	Anxa1
Id22	7.30452e-18	0.652118	0.984	0.899	1.14893e-13	5	Id2
Nucb1	7.60379e-18	0.520098	1	0.979	1.196e-13	5	Nucb1
Rgs5	8.06987e-18	0.336236	0.391	0.077	1.26931e-13	5	Rgs5
Sec24d	8.12037e-18	0.526001	1	0.944	1.27725e-13	5	Sec24d
Entpd1	1.04703e-17	0.709601	0.875	0.519	1.64688e-13	5	Entpd1
Colgalt1	1.13216e-17	0.523721	1	0.982	1.78078e-13	5	Colgalt1
Serpina1b	1.21059e-17	0.420236	0.281	0.041	1.90414e-13	5	Serpina1b
Myl12b	1.33933e-17	0.518104	1	0.988	2.10663e-13	5	Myl12b
Lrrc17	1.35833e-17	0.647315	0.969	0.711	2.13652e-13	5	Lrrc17
Dact1	1.37804e-17	0.635756	0.875	0.536	2.16751e-13	5	Dact1
Prdx41	1.43821e-17	0.436134	1	0.999	2.26217e-13	5	Prdx4
Ptbp1	1.50508e-17	0.43692	1	0.993	2.36734e-13	5	Ptbp1
Copz2	1.5557e-17	0.559306	1	0.952	2.44696e-13	5	Copz2
Kctd10	1.90983e-17	0.595652	0.984	0.957	3.00397e-13	5	Kctd10
Bcar3	2.11798e-17	0.571415	0.594	0.196	3.33138e-13	5	Bcar3
Cyp1b1	2.21515e-17	0.505975	0.656	0.212	3.48421e-13	5	Cyp1b1
Itgb5	2.72351e-17	0.505962	1	0.979	4.2838e-13	5	Itgb5
Cap1	4.80375e-17	0.557739	1	0.953	7.55582e-13	5	Cap1
Arf4	5.67687e-17	0.398904	1	1	8.92915e-13	5	Arf4
Igfbp4	6.81094e-17	0.584415	1	0.996	1.07129e-12	5	Igfbp4
Msrb3	7.82211e-17	0.532045	1	0.977	1.23034e-12	5	Msrb3
Wwp2	8.03086e-17	0.342374	0.984	0.834	1.26317e-12	5	Wwp2
Daam1	1.00197e-16	0.536014	0.984	0.941	1.576e-12	5	Daam1
Pdlim2	1.09863e-16	0.714607	0.906	0.604	1.72804e-12	5	Pdlim2
Ephx1	1.17421e-16	0.654593	0.812	0.46	1.84692e-12	5	Ephx1
Col6a2	1.18248e-16	0.444717	1	0.998	1.85993e-12	5	Col6a2
Serping11	1.28143e-16	0.607879	1	0.793	2.01557e-12	5	Serping1
Myl92	1.46583e-16	0.358432	1	1	2.30561e-12	5	Myl9
Fam114a1	1.74709e-16	0.541701	0.953	0.768	2.748e-12	5	Fam114a1
Twist2	1.96321e-16	0.698612	0.766	0.334	3.08793e-12	5	Twist2
Itgav	1.98395e-16	0.568564	0.953	0.854	3.12055e-12	5	Itgav
Gm15867	2.15949e-16	0.456604	0.578	0.177	3.39667e-12	5	Gm15867
Dhrs3	2.213e-16	0.688107	0.891	0.65	3.48082e-12	5	Dhrs3
Fndc3b	2.46047e-16	0.560942	0.984	0.879	3.87008e-12	5	Fndc3b
Gdf10	2.75672e-16	0.5762	0.922	0.581	4.33604e-12	5	Gdf10
Ifitm2	2.78605e-16	0.380838	1	1	4.38217e-12	5	Ifitm2
St3gal2	3.01261e-16	0.613553	0.906	0.625	4.73854e-12	5	St3gal2
Shisa4	3.08163e-16	0.607654	0.719	0.285	4.84709e-12	5	Shisa4
Pofut2	3.43654e-16	0.420968	1	0.997	5.40533e-12	5	Pofut2
Ramp11	4.11384e-16	0.485371	1	0.978	6.47067e-12	5	Ramp1
Pdgfrb	4.14449e-16	0.534907	1	0.847	6.51887e-12	5	Pdgfrb
Ctnnb1	4.8201e-16	0.294055	1	1	7.58153e-12	5	Ctnnb1
Col3a1	4.8425e-16	0.428124	1	1	7.61677e-12	5	Col3a1
Dpt1	5.24057e-16	0.657642	1	0.945	8.2429e-12	5	Dpt
Ephb6	5.24947e-16	0.398201	0.469	0.122	8.25689e-12	5	Ephb6
Esyt2	5.61974e-16	0.568494	0.906	0.743	8.83928e-12	5	Esyt2
Tgfb1i1	6.24686e-16	0.385362	1	1	9.82569e-12	5	Tgfb1i1
Arhgef40	6.32924e-16	0.524271	0.984	0.867	9.95526e-12	5	Arhgef40
[truncated: 15,457 more rows]
