# Supplementary material for: Cardiac neural crest lineage diversity and underlying gene regulatory networks revealed by multimodal analysis
Source: Research Square preprint supplement (doi:10.21203/rs.3.rs-1756528/v1), 2022-06-24
Supplement: Supplementary file 4 [file SupplementaryData8.xlsx]

## Sheet: craniofacial_scRNA-seq_metadata
	orig.ident	nCount_RNA	nFeature_RNA	percent.mt	nCount_SCT	nFeature_SCT	S.Score	G2M.Score	Phase	old.ident	SCT_snn_res.0.5	seurat_clusters
AAACCTGAGGTGACCA-1	E14.5	10352	3220	2.93663	9814	3218	-0.229971	0.139133	G2M	E14.5	5	5
AAACCTGCACGGTAGA-1	E14.5	10692	2688	3.23606	9808	2687	-0.141518	0.348151	G2M	E14.5	3	3
AAACCTGCACTGTTAG-1	E14.5	8814	2843	2.33719	9079	2842	0.109304	-0.0285661	S	E14.5	6	6
AAACCTGCAGTCAGAG-1	E14.5	8077	2481	3.57806	8883	2481	-0.0919923	0.235567	G2M	E14.5	3	3
AAACCTGCATAGACTC-1	E14.5	7901	2476	3.13884	8830	2476	-0.115976	-0.271745	G1	E14.5	4	4
AAACCTGCATTTGCCC-1	E14.5	8612	2283	2.65908	9059	2283	0.115853	-0.150756	S	E14.5	3	3
AAACCTGTCTGCTGTC-1	E14.5	7664	2130	3.48382	8840	2130	-0.111209	-0.102723	G1	E14.5	2	2
AAACGGGAGCTCTCGG-1	E14.5	23942	4562	2.93209	10060	3112	0.00684148	0.174913	G2M	E14.5	7	7
AAACGGGAGGAGTTTA-1	E14.5	13436	3937	3.2599	10352	3923	-0.17653	-0.119616	G1	E14.5	7	7
AAACGGGAGTAGGCCA-1	E14.5	15589	3830	2.89307	10202	3708	-0.178312	-0.29945	G1	E14.5	0	0
AAACGGGCAAGACACG-1	E14.5	22273	4765	2.56364	10383	3708	-0.194186	0.27943	G2M	E14.5	6	6
AAACGGGCAAGCCGCT-1	E14.5	14140	3542	2.83593	10281	3504	-0.166904	-0.179906	G1	E14.5	18	18
AAACGGGCACGGTTTA-1	E14.5	12590	3509	3.00238	10185	3503	-0.105225	0.0249595	G2M	E14.5	0	0
AAACGGGCAGATGGGT-1	E14.5	18419	4291	3.30094	10493	3902	-0.0843453	-0.238678	G1	E14.5	0	0
AAACGGGCATCCGCGA-1	E14.5	20591	4203	3.215	10321	3450	-0.167709	0.147792	G2M	E14.5	7	7
AAACGGGTCAAACGGG-1	E14.5	7716	2313	3.38258	8800	2312	0.089003	0.359618	G2M	E14.5	0	0
AAACGGGTCAAGATCC-1	E14.5	10440	3101	2.51916	9817	3101	-0.179074	-0.259854	G1	E14.5	1	1
AAACGGGTCGTTTGCC-1	E14.5	8467	2315	2.38573	9018	2315	-0.0609516	0.481123	G2M	E14.5	2	2
AAACGGGTCTACTTAC-1	E14.5	10226	2137	1.98514	9629	2137	-0.16014	-0.157667	G1	E14.5	11	11
AAACGGGTCTGATACG-1	E14.5	10869	2195	4.16782	9768	2193	-0.147261	-0.214675	G1	E14.5	14	14
AAACGGGTCTGTCCGT-1	E14.5	7523	2378	3.29656	8776	2378	-0.0948478	0.229613	G2M	E14.5	5	5
AAAGATGAGAGCTATA-1	E14.5	21124	4460	2.76463	10460	3661	0.26742	-0.0515322	S	E14.5	7	7
AAAGATGAGAGTGAGA-1	E14.5	8590	2425	2.63097	9037	2424	-0.0118446	0.0172938	G2M	E14.5	5	5
AAAGATGAGCCGATTT-1	E14.5	10912	2705	3.93145	9850	2705	0.239313	-0.101119	S	E14.5	2	2
AAAGATGAGTACGCGA-1	E14.5	10115	2742	2.97578	9684	2742	0.0635334	0.182164	G2M	E14.5	2	2
AAAGATGAGTGTGAAT-1	E14.5	10491	3237	3.49824	9826	3237	-0.0122249	0.00968997	G2M	E14.5	5	5
AAAGATGCAGCGTCCA-1	E14.5	10405	3027	2.71985	9806	3027	-0.122763	0.476527	G2M	E14.5	5	5
AAAGATGCAGTAAGAT-1	E14.5	12998	3508	3.41591	10199	3485	-0.23694	-0.304077	G1	E14.5	8	8
AAAGATGCATATGAGA-1	E14.5	8680	2581	2.90323	9057	2581	-0.136612	0.309621	G2M	E14.5	5	5
AAAGATGGTCTGATTG-1	E14.5	9187	2377	3.28725	9276	2376	-0.0563525	0.0564839	G2M	E14.5	2	2
AAAGATGGTGTGGTTT-1	E14.5	5510	2136	3.33938	8449	2147	0.000322066	0.216361	G2M	E14.5	1	1
AAAGATGTCCCGACTT-1	E14.5	12540	3454	2.76715	10190	3453	0.052322	-0.208409	S	E14.5	1	1
AAAGATGTCTCCGGTT-1	E14.5	8795	2594	2.18306	9095	2594	0.0994698	-0.237849	S	E14.5	6	6
AAAGATGTCTGCTTGC-1	E14.5	15954	3544	1.94935	10262	3398	0.353591	-0.0360374	S	E14.5	10	10
AAAGATGTCTTGCATT-1	E14.5	7673	2389	2.51531	8808	2389	-0.0689538	-0.265457	G1	E14.5	14	14
AAAGATGTCTTGCCGT-1	E14.5	10072	2847	3.65369	9664	2846	-0.143491	-0.272185	G1	E14.5	0	0
AAAGCAAAGCAGCGTA-1	E14.5	10132	2706	4.2045	9672	2704	0.0766794	-0.272016	S	E14.5	7	7
AAAGCAAAGGCGATAC-1	E14.5	5241	2006	2.59492	8478	2049	0.174762	0.227065	G2M	E14.5	0	0
AAAGCAAAGTCGTTTG-1	E14.5	9822	2788	2.42313	9586	2788	0.23724	0.3736	G2M	E14.5	6	6
AAAGCAACACGGTAAG-1	E14.5	6223	2045	2.82822	8634	2047	0.0227643	0.0943339	G2M	E14.5	4	4
AAAGCAAGTCTGGAGA-1	E14.5	5690	2168	3.72583	8452	2188	0.0774979	-0.0249922	S	E14.5	1	1
AAAGCAAGTGGTACAG-1	E14.5	6783	2205	3.61197	8651	2206	-0.109383	0.472079	G2M	E14.5	4	4
AAAGCAATCGTCTGCT-1	E14.5	7208	2346	2.76082	8692	2344	0.0204143	0.531196	G2M	E14.5	0	0
AAAGCAATCGTTTATC-1	E14.5	10909	3045	3.70336	9919	3044	0.20577	0.130964	S	E14.5	3	3
AAAGTAGAGCCAGTTT-1	E14.5	12042	3346	2.78193	10121	3345	-0.214416	0.447291	G2M	E14.5	0	0
AAAGTAGAGCTGGAAC-1	E14.5	8532	2787	3.08251	8975	2787	-0.176461	-0.296	G1	E14.5	15	15
AAAGTAGAGTAGGTGC-1	E14.5	7816	2270	2.61003	8840	2270	0.240197	-0.108263	S	E14.5	3	3
AAAGTAGCAACGATGG-1	E14.5	11260	3014	2.73535	9962	3014	-0.0750381	0.469037	G2M	E14.5	1	1
AAAGTAGCACACATGT-1	E14.5	8859	2362	3.07032	9130	2361	-0.121726	-0.0237298	G1	E14.5	2	2
AAAGTAGCACGCTTTC-1	E14.5	6491	2328	3.86689	8565	2328	0.132345	0.263835	G2M	E14.5	0	0
AAAGTAGGTAGCGCTC-1	E14.5	6738	2165	3.35411	8662	2164	-0.127115	-0.285939	G1	E14.5	4	4
AAAGTAGGTTCCACTC-1	E14.5	6815	2285	3.24285	8634	2289	-0.142824	-0.228621	G1	E14.5	1	1
AAAGTAGTCCGCAAGC-1	E14.5	16577	4077	2.70857	10375	3869	0.156454	-0.169365	S	E14.5	8	8
AAAGTAGTCCTGCCAT-1	E14.5	8763	2347	3.02408	9103	2347	-0.20637	-0.103251	G1	E14.5	8	8
AAATGCCAGAAGGTTT-1	E14.5	21190	4084	2.79377	10353	3267	-0.0959336	0.205212	G2M	E14.5	7	7
AAATGCCAGCTACCGC-1	E14.5	10332	2943	3.01974	9761	2941	0.122297	-0.162816	S	E14.5	9	9
AAATGCCAGGTCGGAT-1	E14.5	24913	4760	3.0747	9835	2989	-0.138778	-0.24442	G1	E14.5	8	8
AAATGCCCACCCAGTG-1	E14.5	13319	3616	2.8831	10272	3601	-0.0313331	0.106291	G2M	E14.5	0	0
AAATGCCCAGACACTT-1	E14.5	8569	2824	2.74244	8976	2822	0.223713	0.0601472	S	E14.5	1	1
AAATGCCGTGACGCCT-1	E14.5	8902	2847	2.89823	9124	2847	-0.168675	-0.0379211	G1	E14.5	1	1
AAATGCCTCGTAGGTT-1	E14.5	12378	3258	2.41558	10117	3254	-0.0755867	0.218397	G2M	E14.5	3	3
AAATGCCTCGTTACAG-1	E14.5	8227	2806	3.65868	8879	2806	-0.187609	-0.356964	G1	E14.5	1	1
AACACGTAGCGATTCT-1	E14.5	5288	2190	3.44175	8380	2215	0.003326	-0.305621	S	E14.5	1	1
AACACGTAGGGTTCCC-1	E14.5	27148	4974	3.87874	9708	2858	-0.0665436	-0.163809	G1	E14.5	5	5
AACACGTAGTGTGAAT-1	E14.5	8207	2127	2.99744	8965	2125	0.102932	0.00196246	S	E14.5	14	14
AACACGTCAAACCTAC-1	E14.5	6925	2389	2.74368	8635	2389	0.285684	0.0765204	S	E14.5	10	10
AACACGTCAAGAAGAG-1	E14.5	14861	3538	2.9675	10196	3451	-0.134569	-0.00565115	G1	E14.5	15	15
AACACGTCACAACTGT-1	E14.5	9987	2797	3.074	9641	2797	0.0283578	-0.042068	S	E14.5	15	15
AACACGTCACGGCTAC-1	E14.5	11828	3257	2.46872	10060	3256	-0.0155715	0.10573	G2M	E14.5	3	3
AACACGTGTCAACTGT-1	E14.5	6112	2062	2.78141	8607	2069	-0.14419	-0.22409	G1	E14.5	1	1
AACACGTGTTCAGCGC-1	E14.5	9620	2699	3.34719	9495	2698	-0.0131261	-0.173445	G1	E14.5	7	7
AACACGTTCCAGAAGG-1	E14.5	8701	2231	2.79278	9106	2231	-0.0610677	0.0469186	G2M	E14.5	2	2
AACACGTTCTGCCCTA-1	E14.5	7403	2213	3.34999	8763	2212	-0.149137	0.0695493	G2M	E14.5	2	2
AACACGTTCTGTCAAG-1	E14.5	10867	3024	2.72384	9886	3024	-0.228725	-0.0872901	G1	E14.5	0	0
AACCATGAGCCAGGAT-1	E14.5	6969	2187	2.43937	8711	2187	-0.0709248	-0.16368	G1	E14.5	0	0
AACCATGAGGCTCTTA-1	E14.5	15914	3638	2.72087	10233	3508	-0.0523822	0.191853	G2M	E14.5	7	7
AACCATGAGTAGCGGT-1	E14.5	6207	2026	2.73884	8652	2033	0.179352	0.112344	S	E14.5	0	0
AACCATGAGTGAAGTT-1	E14.5	6418	2219	2.92926	8607	2222	-0.210774	0.00268682	G2M	E14.5	4	4
AACCATGCATTAGCCA-1	E14.5	6925	2019	3.94224	8728	2019	-0.0487087	-0.203407	G1	E14.5	0	0
AACCATGGTCAACATC-1	E14.5	10583	2545	2.66465	9782	2545	-0.082189	-0.0960403	G1	E14.5	2	2
AACCATGGTCCTAGCG-1	E14.5	8177	2485	3.36309	8920	2484	0.386616	0.0774361	S	E14.5	6	6
AACCATGGTCGGCACT-1	E14.5	8582	2917	3.20438	8993	2917	0.0939004	0.49906	G2M	E14.5	9	9
AACCATGGTCTCTTTA-1	E14.5	11356	2774	3.85699	9933	2774	0.366081	-0.166311	S	E14.5	2	2
AACCATGGTCTTGTCC-1	E14.5	8547	2876	2.3049	8976	2875	0.110695	-0.273624	S	E14.5	9	9
AACCATGGTGAGGGAG-1	E14.5	8010	2375	2.7965	8879	2375	-0.0929523	-0.260576	G1	E14.5	0	0
AACCATGTCATCGCTC-1	E14.5	11486	3434	3.03848	10090	3434	0.0117895	-0.0665712	S	E14.5	6	6
AACCATGTCCCTCTTT-1	E14.5	7385	2270	3.72376	8746	2270	0.0209079	0.15666	G2M	E14.5	3	3
AACCATGTCTGAGGGA-1	E14.5	8614	2613	3.04156	9021	2613	-0.162646	-0.251814	G1	E14.5	1	1
AACCGCGAGAGGTTGC-1	E14.5	8914	2679	2.84945	9129	2678	0.0905923	0.0317794	S	E14.5	6	6
AACCGCGCAACACCTA-1	E14.5	5434	2214	2.94442	8368	2236	-0.0768066	-0.31686	G1	E14.5	1	1
AACCGCGCACAGGTTT-1	E14.5	10790	3031	3.07692	9874	3030	-0.115702	0.382614	G2M	E14.5	0	0
AACCGCGCACGTTGGC-1	E14.5	7814	2382	3.44254	8847	2382	-0.168903	0.000377639	G2M	E14.5	0	0
AACCGCGCAGCTTCGG-1	E14.5	9716	2864	3.05681	9541	2863	0.15857	-0.152756	S	E14.5	4	4
AACCGCGCAGTATCTG-1	E14.5	12128	3175	2.83641	10084	3172	-0.0953247	-0.253945	G1	E14.5	1	1
AACCGCGCAGTCTTCC-1	E14.5	13337	3308	2.5493	10190	3294	-0.0273039	-0.18451	G1	E14.5	1	1
AACCGCGCATACTCTT-1	E14.5	13693	3311	0.606149	10232	3284	0.134535	0.381342	G2M	E14.5	5	5
AACCGCGCATGTCTCC-1	E14.5	7266	2223	3.01404	8723	2223	-0.0485976	0.404789	G2M	E14.5	0	0
AACCGCGCATTTGCCC-1	E14.5	8599	2103	3.44226	9082	2103	0.00990498	-0.146588	S	E14.5	2	2
AACCGCGGTAAATGTG-1	E14.5	17199	3090	1.62219	10102	2744	-0.102328	-0.0299971	G1	E14.5	13	13
AACCGCGTCTAAGCCA-1	E14.5	5636	2070	2.94535	8483	2081	-0.0364809	-0.209763	G1	E14.5	1	1
AACGTTGAGACTGTAA-1	E14.5	11450	2868	2.57642	9936	2865	0.155204	-0.255503	S	E14.5	4	4
AACGTTGAGATCCCAT-1	E14.5	10257	3309	2.72009	9801	3306	-0.2774	-0.198681	G1	E14.5	11	11
AACGTTGAGCTAGGCA-1	E14.5	17458	2589	1.89025	10049	2178	-0.0380696	-0.0448548	G1	E14.5	13	13
AACGTTGAGGGAAACA-1	E14.5	7349	2336	3.46986	8724	2336	0.188374	-0.240107	S	E14.5	6	6
AACGTTGAGGGTGTGT-1	E14.5	12313	3458	3.11053	10159	3453	-0.127637	0.144182	G2M	E14.5	1	1
AACGTTGAGTTAGGTA-1	E14.5	13661	3121	2.17407	10135	3091	-0.04703	0.221539	G2M	E14.5	0	0
AACGTTGCACGGACAA-1	E14.5	6726	2089	4.04401	8676	2088	-0.200345	-0.20642	G1	E14.5	1	1
AACGTTGCACTTACGA-1	E14.5	5819	2070	3.90101	8546	2090	-0.147436	-0.217741	G1	E14.5	0	0
AACGTTGCAGGGCATA-1	E14.5	9209	2577	3.39885	9278	2576	-0.152605	0.178254	G2M	E14.5	3	3
AACGTTGGTGCACCAC-1	E14.5	11383	3322	2.86392	10038	3321	0.0966929	0.275605	G2M	E14.5	3	3
AACGTTGTCAGGATCT-1	E14.5	8307	2310	3.53918	8976	2310	0.0211932	0.305288	G2M	E14.5	4	4
AACGTTGTCAGGTAAA-1	E14.5	6841	2308	2.7189	8645	2310	-0.062884	-0.203252	G1	E14.5	10	10
AACGTTGTCGTGGTCG-1	E14.5	8080	2274	2.01733	8920	2273	-0.0292943	-0.0242474	G1	E14.5	0	0
AACTCAGAGCCAGTAG-1	E14.5	19301	4338	2.31594	10568	3891	0.0426024	0.407291	G2M	E14.5	3	3
AACTCAGAGGATATAC-1	E14.5	8729	2596	2.82965	9078	2596	0.258806	-0.077536	S	E14.5	5	5
AACTCAGAGGGAGTAA-1	E14.5	12867	3573	2.99215	10189	3565	0.112459	-0.0458539	S	E14.5	4	4
AACTCAGAGTCTTGCA-1	E14.5	17357	4115	2.48891	10423	3858	-0.135084	0.031874	G2M	E14.5	2	2
AACTCAGCAGATCCAT-1	E14.5	18084	4326	2.69852	10438	3939	-0.149671	-0.281103	G1	E14.5	1	1
AACTCAGCATCCCATC-1	E14.5	13207	3036	2.77883	10116	3024	0.174572	-0.0998735	S	E14.5	2	2
AACTCAGCATCGGTTA-1	E14.5	8029	2557	3.42508	8844	2557	-0.163299	-0.219462	G1	E14.5	0	0
AACTCAGCATTGGGCC-1	E14.5	6479	2053	2.60843	8684	2056	-0.0337956	-0.251529	G1	E14.5	6	6
AACTCAGGTAAAGTCA-1	E14.5	7756	2312	3.21042	8832	2312	0.100925	-0.196618	S	E14.5	3	3
AACTCAGGTCCGTTAA-1	E14.5	5898	2170	3.40793	8500	2176	0.123754	0.0921782	S	E14.5	4	4
AACTCAGGTGCCTGCA-1	E14.5	8067	2458	2.83873	8875	2458	-0.0859275	-0.124203	G1	E14.5	3	3
AACTCAGTCGCAGGCT-1	E14.5	18391	3939	2.62085	10373	3548	-0.18585	-0.368163	G1	E14.5	1	1
AACTCCCAGTACACCT-1	E14.5	19468	3825	2.54263	10334	3288	-0.0275455	-0.045291	G1	E14.5	2	2
AACTCCCCAACGCACC-1	E14.5	14847	3751	2.97703	10190	3671	0.0517629	-0.154446	S	E14.5	10	10
AACTCCCCACCCATTC-1	E14.5	6357	2111	2.94164	8631	2113	-0.189535	-0.250301	G1	E14.5	0	0
AACTCCCCACCGTTGG-1	E14.5	9849	2917	2.2845	9614	2917	-0.242356	0.597793	G2M	E14.5	6	6
AACTCCCCAGCTGTAT-1	E14.5	10103	2716	2.71207	9672	2715	0.307717	-0.0806448	S	E14.5	3	3
AACTCCCCAGTCCTTC-1	E14.5	9236	2516	2.50108	9290	2515	-0.0751871	-0.255025	G1	E14.5	5	5
AACTCCCGTACTCTCC-1	E14.5	20006	4351	2.36929	10424	3738	-0.188653	0.0448149	G2M	E14.5	0	0
AACTCCCGTACTTCTT-1	E14.5	20928	4321	2.60417	10389	3557	0.230542	0.0699396	S	E14.5	3	3
AACTCCCGTAGCCTCG-1	E14.5	7216	2153	2.6469	8753	2153	-0.111956	-0.252705	G1	E14.5	3	3
AACTCCCGTCACTTCC-1	E14.5	22275	4845	2.36139	10388	3810	0.14729	0.233598	G2M	E14.5	0	0
AACTCCCGTCCCGACA-1	E14.5	11371	2996	3.13957	9966	2996	-0.212608	-0.347181	G1	E14.5	3	3
AACTCCCTCCTCTAGC-1	E14.5	8385	2582	2.62373	8964	2582	0.00947117	0.405879	G2M	E14.5	0	0
AACTCTTAGGAACTGC-1	E14.5	10352	2963	2.49227	9762	2963	0.0152187	0.198719	G2M	E14.5	6	6
AACTCTTAGTCGCCGT-1	E14.5	8518	2571	3.59239	9015	2571	-0.000120878	-0.332841	G1	E14.5	0	0
AACTCTTCAAGGACTG-1	E14.5	8736	2695	2.35806	9073	2695	-0.153646	0.220289	G2M	E14.5	4	4
AACTCTTCATCGGAAG-1	E14.5	6437	2202	3.0915	8625	2209	0.292533	-0.105316	S	E14.5	1	1
AACTCTTGTAAGTAGT-1	E14.5	6744	2068	3.55872	8697	2070	-8.70968e-05	-0.144445	G1	E14.5	3	3
AACTCTTGTCCAAGTT-1	E14.5	8489	2833	3.59288	8967	2832	0.109147	-0.183574	S	E14.5	1	1
AACTCTTGTGTTCGAT-1	E14.5	8438	2600	3.21166	8968	2597	-0.123991	-0.294485	G1	E14.5	0	0
AACTCTTGTTAGTGGG-1	E14.5	8646	2588	2.74115	9041	2588	0.172168	-0.0225115	S	E14.5	0	0
AACTCTTTCACTCCTG-1	E14.5	12814	3431	4.08147	10206	3425	-0.104492	0.427985	G2M	E14.5	11	11
AACTCTTTCGTTTGCC-1	E14.5	31536	5584	2.5241	9493	2813	-0.110649	0.514557	G2M	E14.5	2	2
AACTGGTAGACCACGA-1	E14.5	11413	3019	2.33944	9992	3018	-0.132423	-0.289635	G1	E14.5	2	2
AACTGGTAGGCCGAAT-1	E14.5	21258	4357	2.76131	10266	3429	0.0609307	0.249708	G2M	E14.5	0	0
AACTGGTAGGGCTTGA-1	E14.5	5720	2137	2.55245	8512	2156	-0.00464332	-0.0467535	G1	E14.5	3	3
AACTGGTAGTCATGCT-1	E14.5	10567	2005	3.2081	9680	2005	-0.0294821	-0.0574149	G1	E14.5	13	13
AACTGGTAGTGTTTGC-1	E14.5	22543	4573	2.35993	10247	3483	-0.0564206	-0.338735	G1	E14.5	14	14
AACTGGTCAAGAGGCT-1	E14.5	7870	2466	3.54511	8824	2465	0.061057	-0.230521	S	E14.5	10	10
AACTGGTCAAGCGTAG-1	E14.5	10187	2735	2.75842	9680	2734	0.0987638	0.0524705	S	E14.5	6	6
AACTGGTCAGCCAGAA-1	E14.5	12660	3261	2.20379	10126	3257	-0.223951	-0.33189	G1	E14.5	1	1
AACTGGTGTCCAAGTT-1	E14.5	8420	2522	2.71971	8961	2522	0.237815	-0.234294	S	E14.5	17	17
AACTGGTGTCTAAAGA-1	E14.5	8428	2380	2.58662	9006	2379	-0.0921749	0.124617	G2M	E14.5	4	4
AACTGGTGTCTACCTC-1	E14.5	13576	3664	2.90218	10259	3639	-0.238177	0.0473812	G2M	E14.5	3	3
AACTGGTGTGCACCAC-1	E14.5	11625	3179	3.01075	10029	3177	0.0461725	-0.179643	S	E14.5	1	1
AACTTTCAGCCCGAAA-1	E14.5	10636	3069	2.52915	9862	3069	-0.187363	-0.282961	G1	E14.5	6	6
AACTTTCAGGCCCTTG-1	E14.5	8556	2297	2.44273	9040	2296	-0.223267	-0.18873	G1	E14.5	8	8
AACTTTCAGGCGCTCT-1	E14.5	6662	2320	2.67187	8623	2320	-0.202315	0.139822	G2M	E14.5	0	0
AACTTTCAGTAATCCC-1	E14.5	8935	2449	2.69726	9155	2448	-0.0451507	-0.196837	G1	E14.5	8	8
AACTTTCCAAACGTGG-1	E14.5	7259	2160	2.54856	8737	2160	0.0356365	-0.194409	S	E14.5	4	4
AACTTTCCAAGTAATG-1	E14.5	5465	2141	3.84263	8373	2166	-0.0820068	-0.167092	G1	E14.5	9	9
AACTTTCCAGATGGGT-1	E14.5	10597	3106	2.84043	9851	3105	-0.198918	-0.176409	G1	E14.5	15	15
AACTTTCCAGTAAGCG-1	E14.5	6196	2125	2.64687	8618	2135	-0.0216155	-0.26725	G1	E14.5	9	9
AACTTTCGTGATGATA-1	E14.5	5957	2058	2.7027	8614	2069	0.178886	-0.00504855	S	E14.5	1	1
AACTTTCGTGATGTCT-1	E14.5	12186	3320	3.54505	10122	3317	-0.0825654	-0.072482	G1	E14.5	3	3
AACTTTCGTTACGTCA-1	E14.5	7262	2426	4.07601	8712	2427	-0.095969	-0.219243	G1	E14.5	1	1
AACTTTCTCAGCAACT-1	E14.5	7491	2539	1.92231	8714	2539	0.117039	0.38681	G2M	E14.5	9	9
AACTTTCTCGTAGGAG-1	E14.5	5967	2019	3.26797	8605	2026	-0.0477808	-0.239801	G1	E14.5	6	6
AACTTTCTCTGGCGAC-1	E14.5	20466	4746	2.64829	10525	4043	0.062317	-0.248149	S	E14.5	0	0
AACTTTCTCTGGGCCA-1	E14.5	20199	4242	2.20803	10422	3610	0.0491463	0.111318	G2M	E14.5	6	6
AACTTTCTCTTCGGTC-1	E14.5	7473	2676	4.2687	8674	2676	-0.0888177	-0.193535	G1	E14.5	1	1
AAGACCTAGACACTAA-1	E14.5	9062	2704	3.28846	9196	2704	0.113972	0.389194	G2M	E14.5	17	17
AAGACCTAGAGGGATA-1	E14.5	8082	2428	3.81094	8880	2428	-0.121849	0.463888	G2M	E14.5	10	10
AAGACCTAGTTAGGTA-1	E14.5	15340	3660	2.95958	10139	3556	-0.151	0.242831	G2M	E14.5	12	12
AAGACCTCACCTGGTG-1	E14.5	7269	2439	2.86147	8689	2439	-0.133054	-0.282717	G1	E14.5	0	0
AAGACCTCACGGCGTT-1	E14.5	8143	2091	4.17537	8988	2091	0.187265	-0.0793186	S	E14.5	2	2
AAGACCTCATTGTGCA-1	E14.5	8461	2300	2.38742	9013	2299	-0.0508734	-0.149389	G1	E14.5	2	2
AAGCCGCAGAAGGCCT-1	E14.5	6837	2507	3.9491	8592	2508	-0.183443	-0.276983	G1	E14.5	0	0
AAGCCGCCAAGGGTCA-1	E14.5	11180	2691	2.39714	9902	2691	-0.158157	0.0547865	G2M	E14.5	2	2
AAGCCGCCACACGCTG-1	E14.5	6438	2237	3.7434	8597	2237	-0.0137329	-0.132839	G1	E14.5	1	1
AAGCCGCCACGGATAG-1	E14.5	5665	2068	3.19506	8503	2086	-0.0909804	-0.226734	G1	E14.5	1	1
AAGCCGCCATACAGCT-1	E14.5	5871	2162	3.86646	8511	2174	-0.184057	-0.19252	G1	E14.5	9	9
AAGCCGCGTAGATTAG-1	E14.5	32077	5861	2.89304	9592	3039	0.0297721	-0.0429183	S	E14.5	1	1
AAGCCGCGTCATGCCG-1	E14.5	5906	2170	2.62445	8530	2175	-0.108338	0.323806	G2M	E14.5	1	1
AAGCCGCTCATGGTCA-1	E14.5	9065	2925	2.5262	9200	2925	0.092374	-0.246376	S	E14.5	0	0
AAGCCGCTCCAAACTG-1	E14.5	7064	2194	3.22763	8739	2194	0.0199575	-0.283886	S	E14.5	1	1
AAGCCGCTCCTCGCAT-1	E14.5	7071	2222	2.85674	8713	2220	-0.110661	-0.270292	G1	E14.5	0	0
AAGCCGCTCGGCTACG-1	E14.5	5456	2125	2.01613	8432	2140	0.0650605	0.141857	G2M	E14.5	4	4
AAGGAGCAGTACGTAA-1	E14.5	25536	5084	2.96053	9861	3255	-0.120446	-0.178987	G1	E14.5	3	3
AAGGAGCCACGAAGCA-1	E14.5	19534	3950	3.60397	10327	3399	0.175856	0.0180081	S	E14.5	2	2
AAGGAGCCACGGTAAG-1	E14.5	9533	2675	2.74835	9449	2675	-0.143488	-0.280317	G1	E14.5	11	11
AAGGAGCCATGAGCGA-1	E14.5	21956	4590	3.03334	10283	3566	-0.0250531	-0.283903	G1	E14.5	0	0
AAGGAGCCATGTCCTC-1	E14.5	9294	2919	3.15257	9298	2919	-0.230308	-0.266329	G1	E14.5	1	1
AAGGAGCGTACTTAGC-1	E14.5	10938	2878	2.56903	9881	2878	-0.00232086	0.114683	G2M	E14.5	3	3
AAGGAGCGTCGACTGC-1	E14.5	8444	2430	3.69493	9004	2430	0.0874531	-0.112049	S	E14.5	2	2
AAGGAGCTCCGCTGTT-1	E14.5	8098	2374	3.05014	8918	2374	-0.0589472	-0.261054	G1	E14.5	0	0
AAGGAGCTCGAGAGCA-1	E14.5	10761	3053	3.08522	9865	3051	-0.145673	-0.085077	G1	E14.5	14	14
AAGGCAGAGCTTATCG-1	E14.5	7454	2246	1.83794	8677	2246	-0.0758391	0.217678	G2M	E14.5	8	8
AAGGCAGAGGTGATTA-1	E14.5	7173	2386	2.89976	8676	2385	-0.0840354	-0.295653	G1	E14.5	9	9
AAGGCAGAGTACGCCC-1	E14.5	6431	2316	3.24988	8562	2320	-0.176216	-0.279866	G1	E14.5	10	10
AAGGCAGCAAGACGTG-1	E14.5	13678	3612	3.28995	10294	3590	-0.0064334	-0.0425802	G1	E14.5	1	1
AAGGCAGCATGGGAAC-1	E14.5	7133	2463	2.32721	8631	2464	-0.157211	-0.290405	G1	E14.5	9	9
AAGGCAGCATGTTGAC-1	E14.5	10144	2884	3.90379	9684	2884	0.203911	-0.141059	S	E14.5	3	3
AAGGCAGGTATAGGTA-1	E14.5	6327	2096	4.61514	8632	2099	-0.0973154	-0.205393	G1	E14.5	5	5
AAGGCAGGTTCAGACT-1	E14.5	5949	2177	2.75677	8521	2189	-0.108839	-0.286365	G1	E14.5	9	9
AAGGCAGTCCGCAGTG-1	E14.5	11956	2427	1.49716	9909	2421	-0.160922	-0.167863	G1	E14.5	13	13
AAGGCAGTCCTAGAAC-1	E14.5	10853	3135	2.57072	9895	3134	-0.188697	-0.249257	G1	E14.5	0	0
AAGGTTCAGTCCCACG-1	E14.5	6808	2173	2.59988	8683	2174	-0.115705	0.653636	G2M	E14.5	4	4
AAGGTTCAGTCGTACT-1	E14.5	17506	4033	2.33634	10404	3754	0.108633	0.0340734	S	E14.5	13	13
AAGGTTCCAAGTACCT-1	E14.5	6624	2281	2.41546	8600	2283	0.205299	-0.219011	S	E14.5	0	0
AAGGTTCCAGCGATCC-1	E14.5	5492	2035	3.25929	8517	2064	0.0656435	-0.239998	S	E14.5	0	0
AAGGTTCCAGGTGCCT-1	E14.5	9574	2808	2.54857	9478	2808	-0.0376344	0.319251	G2M	E14.5	0	0
AAGGTTCGTGGTCCGT-1	E14.5	9192	2590	2.9047	9271	2590	-0.187049	-0.193958	G1	E14.5	4	4
AAGGTTCGTTACGACT-1	E14.5	6429	2218	2.79981	8605	2224	0.118222	-0.116889	S	E14.5	1	1
AAGGTTCTCAGAAATG-1	E14.5	7976	2349	2.65797	8882	2349	-0.0948972	-0.245622	G1	E14.5	3	3
AAGGTTCTCGGATGGA-1	E14.5	9800	2386	3.33673	9544	2386	0.144881	-0.204461	S	E14.5	2	2
AAGTCTGAGACAGGCT-1	E14.5	23352	4921	2.99332	10243	3591	-0.0891773	0.213932	G2M	E14.5	0	0
AAGTCTGAGATGTCGG-1	E14.5	8776	2631	3.25889	9091	2631	-0.101113	-0.277213	G1	E14.5	6	6
AAGTCTGCATCACCCT-1	E14.5	9336	2777	2.8599	9335	2776	0.00316695	0.0137717	G2M	E14.5	0	0
AAGTCTGCATGAGCGA-1	E14.5	11070	2768	2.52033	9873	2767	0.0412381	-0.207698	S	E14.5	0	0
AAGTCTGCATTGTGCA-1	E14.5	7655	2396	3.26584	8784	2394	-0.177041	-0.207309	G1	E14.5	0	0
AAGTCTGGTAGCGCTC-1	E14.5	9925	2614	2.7204	9595	2614	-0.030602	-0.0217847	G1	E14.5	4	4
AAGTCTGGTATCAGTC-1	E14.5	15423	3817	2.22395	10264	3716	-0.162674	0.424374	G2M	E14.5	5	5
AAGTCTGTCGGTCTAA-1	E14.5	16138	4074	2.7017	10366	3929	0.275134	-0.0506582	S	E14.5	1	1
AATCCAGAGACCACGA-1	E14.5	10841	3005	2.32451	9884	3005	0.148182	0.0606322	S	E14.5	0	0
AATCCAGAGACTAAGT-1	E14.5	10205	3013	2.60657	9732	3011	-0.148636	-0.316277	G1	E14.5	4	4
AATCCAGAGTGGGATC-1	E14.5	8314	2126	3.4039	8994	2126	0.10147	-0.0871055	S	E14.5	2	2
AATCCAGCAGCGAACA-1	E14.5	12449	3232	2.69098	10115	3230	-0.0979407	-0.297444	G1	E14.5	4	4
AATCCAGCAGGTCGTC-1	E14.5	7730	2564	2.41915	8760	2562	-0.0663119	0.280871	G2M	E14.5	5	5
AATCCAGCATGGTCTA-1	E14.5	8923	2432	0.773283	9150	2432	-0.195852	-0.0446262	G1	E14.5	5	5
AATCCAGTCAACGGCC-1	E14.5	6375	2073	3.45098	8656	2082	0.131606	-0.184927	S	E14.5	0	0
AATCCAGTCAATAAGG-1	E14.5	11200	3095	4.05357	9967	3095	-0.158169	-0.0887237	G1	E14.5	5	5
AATCGGTAGAAGGGTA-1	E14.5	9570	2547	3.28109	9459	2547	0.0199585	-0.301225	S	E14.5	15	15
AATCGGTCAAACTGCT-1	E14.5	12971	3425	2.69833	10161	3411	-0.199347	-0.24897	G1	E14.5	0	0
AATCGGTCAAAGGTGC-1	E14.5	6795	2194	3.26711	8653	2197	-0.131324	-0.219882	G1	E14.5	0	0
AATCGGTGTTCCCTTG-1	E14.5	10898	2738	4.56047	9848	2737	0.0906257	-0.217346	S	E14.5	7	7
AATCGGTTCATGTCCC-1	E14.5	8182	2429	3.40992	8906	2426	0.0132523	0.256889	G2M	E14.5	8	8
AATCGGTTCCTGTAGA-1	E14.5	7922	2503	3.67331	8832	2503	0.200434	-0.152176	S	E14.5	0	0
AATCGGTTCGCATGAT-1	E14.5	8952	2849	3.26184	9145	2848	-0.0871442	-0.285744	G1	E14.5	1	1
AATCGGTTCTCGATGA-1	E14.5	7233	2359	2.91719	8700	2359	0.16078	0.0486331	S	E14.5	0	0
AATCGGTTCTCTAGGA-1	E14.5	7960	2269	2.70101	8893	2269	0.115286	-0.176847	S	E14.5	2	2
AATCGGTTCTGCTTGC-1	E14.5	7808	2581	3.49641	8787	2581	-0.0911611	-0.108877	G1	E14.5	0	0
AATCGGTTCTTGAGAC-1	E14.5	11310	2425	2.07781	9851	2424	-0.109419	-0.165695	G1	E14.5	13	13
ACACCAAAGAACTCGG-1	E14.5	15394	3633	2.76731	10238	3540	0.0792587	0.05299	S	E14.5	7	7
ACACCAAAGTCGTACT-1	E14.5	11417	3041	2.50504	9985	3041	-0.038545	-0.301823	G1	E14.5	6	6
ACACCAAAGTCGTTTG-1	E14.5	11952	3484	2.76941	10131	3481	0.269008	-0.0889245	S	E14.5	1	1
ACACCAAAGTGCGTGA-1	E14.5	6270	2116	4.78469	8646	2120	-0.0699109	-0.229222	G1	E14.5	0	0
ACACCAACAAGGACAC-1	E14.5	8898	2312	2.93324	9168	2312	0.196127	0.026585	S	E14.5	2	2
ACACCAACACCAGATT-1	E14.5	7846	2406	3.39026	8828	2406	-0.0925769	-0.204542	G1	E14.5	4	4
ACACCAAGTACCGTTA-1	E14.5	6404	2299	3.51343	8571	2304	-0.111218	0.272449	G2M	E14.5	6	6
ACACCAAGTCGCTTCT-1	E14.5	5868	2059	2.72665	8564	2064	0.174299	0.150968	S	E14.5	10	10
ACACCAATCAGGCCCA-1	E14.5	14642	3745	3.2919	10239	3685	-0.0550178	0.147724	G2M	E14.5	4	4
ACACCAATCTTGGGTA-1	E14.5	6339	2288	2.96577	8607	2292	-0.00135406	-0.281702	G1	E14.5	9	9
ACACCCTAGACAGAGA-1	E14.5	5527	2052	3.29293	8461	2082	-0.162424	-0.14675	G1	E14.5	1	1
ACACCCTAGCGGCTTC-1	E14.5	15395	3571	3.00097	10158	3460	-0.1119	-0.230693	G1	E14.5	2	2
ACACCCTCACAGCCCA-1	E14.5	6659	2332	2.77819	8603	2332	0.207428	0.146491	S	E14.5	0	0
ACACCCTCACCGTTGG-1	E14.5	13862	3761	2.87837	10345	3730	-0.154241	-0.344229	G1	E14.5	1	1
ACACCCTCAGAAGCAC-1	E14.5	7393	2290	4.626	8758	2290	-0.0967374	0.160434	G2M	E14.5	3	3
ACACCCTCATAGAAAC-1	E14.5	14608	3854	3.13527	10276	3775	0.0318555	0.241418	G2M	E14.5	4	4
ACACCCTCATCCTAGA-1	E14.5	10521	2936	3.15559	9801	2936	-0.0648005	-0.246391	G1	E14.5	0	0
ACACCCTGTGCCTGCA-1	E14.5	13420	3719	2.43666	10326	3702	-0.0432469	0.332842	G2M	E14.5	1	1
ACACCCTTCATGCAAC-1	E14.5	11425	3185	3.0547	10011	3182	-0.214975	-0.315254	G1	E14.5	11	11
ACACCCTTCCGCGTTT-1	E14.5	19607	4264	2.57051	10404	3679	-0.0738693	0.0932062	G2M	E14.5	2	2
ACACCCTTCGGCGCTA-1	E14.5	8819	2615	2.75541	9105	2615	-0.177348	0.541539	G2M	E14.5	4	4
ACACCCTTCGTTTATC-1	E14.5	10605	2643	2.29137	9793	2643	0.0536335	-0.130911	S	E14.5	16	16
ACACCCTTCTGTGCAA-1	E14.5	8768	2521	3.22765	9093	2520	-0.0628483	0.394589	G2M	E14.5	3	3
ACACCCTTCTTGGGTA-1	E14.5	5854	2257	3.17731	8476	2274	-0.0610818	-0.284713	G1	E14.5	1	1
ACACCGGAGAAGGTTT-1	E14.5	10421	3016	2.44698	9787	3016	-0.166026	-0.216266	G1	E14.5	1	1
ACACCGGAGACAAAGG-1	E14.5	10334	2713	3.60944	9728	2713	0.117095	0.0194127	S	E14.5	2	2
ACACCGGAGAGCCCAA-1	E14.5	14624	3037	3.19338	10147	2968	-0.0995385	0.253732	G2M	E14.5	2	2
ACACCGGAGAGCTATA-1	E14.5	17083	4110	2.83908	10384	3859	-0.129676	-0.368266	G1	E14.5	0	0
ACACCGGAGAGCTTCT-1	E14.5	19410	4532	2.98815	10470	3961	-0.0494869	-0.176308	G1	E14.5	0	0
ACACCGGAGATATGGT-1	E14.5	5708	2075	2.85564	8513	2088	-0.105115	-0.252506	G1	E14.5	10	10
ACACCGGAGCAAATCA-1	E14.5	10944	2907	3.20724	9886	2906	0.274504	0.00897877	S	E14.5	3	3
ACACCGGAGGGATGGG-1	E14.5	9997	2747	3.6511	9631	2746	0.137701	-0.10844	S	E14.5	16	16
ACACCGGCAATGTTGC-1	E14.5	9187	2899	2.8954	9263	2899	-0.0405934	0.444559	G2M	E14.5	0	0
ACACCGGCAGTGAGTG-1	E14.5	8537	2182	3.20956	9055	2182	0.0934982	-0.0855872	S	E14.5	8	8
ACACCGGGTTATCGGT-1	E14.5	6349	2055	2.50433	8656	2059	0.181085	0.0147127	S	E14.5	4	4
ACACCGGTCAATCACG-1	E14.5	8634	2657	2.2006	9024	2657	0.0406037	0.053474	G2M	E14.5	1	1
ACACCGGTCCTAAGTG-1	E14.5	9208	2663	3.3232	9277	2663	-0.103251	-0.17023	G1	E14.5	4	4
ACACTGAAGAACAATC-1	E14.5	13245	3309	3.29181	10185	3295	0.255603	-0.0416702	S	E14.5	4	4
ACACTGAAGCGATAGC-1	E14.5	9169	2836	3.02105	9256	2835	-0.0874997	0.42159	G2M	E14.5	0	0
ACACTGAAGGTAGCTG-1	E14.5	11643	2962	4.91282	10033	2955	-0.240195	-0.266983	G1	E14.5	10	10
ACACTGAAGTAGTGCG-1	E14.5	6560	2454	3.29268	8532	2455	-0.16916	-0.213216	G1	E14.5	9	9
ACACTGAAGTGGTCCC-1	E14.5	6121	2061	3.23477	8618	2065	-0.16307	-0.184881	G1	E14.5	1	1
ACACTGAAGTGTACGG-1	E14.5	12883	3464	2.82543	10216	3457	0.0307257	-0.224481	S	E14.5	3	3
ACACTGACAATGCCAT-1	E14.5	9876	3151	2.24787	9625	3151	-0.076041	0.793508	G2M	E14.5	9	9
ACACTGACATTACGAC-1	E14.5	10195	2233	2.89358	9631	2233	0.0129662	-0.249317	S	E14.5	13	13
ACACTGAGTAATCGTC-1	E14.5	18026	3773	2.57961	10329	3392	-0.0248169	-0.210955	G1	E14.5	3	3
ACACTGAGTATGCTTG-1	E14.5	6525	2148	1.74713	8636	2152	-0.116982	-0.287256	G1	E14.5	17	17
ACACTGAGTCCGCTGA-1	E14.5	10890	2984	3.39761	9877	2984	-0.211977	0.318193	G2M	E14.5	0	0
ACACTGATCATGTCTT-1	E14.5	7921	2304	3.32029	8857	2304	0.0165716	0.273096	G2M	E14.5	0	0
ACACTGATCCGCGTTT-1	E14.5	7269	2339	3.8107	8705	2338	-0.00360081	-0.27854	G1	E14.5	0	0
ACACTGATCTGAAAGA-1	E14.5	15156	3668	2.38189	10223	3591	-0.0333083	0.323494	G2M	E14.5	7	7
ACAGCCGAGAGTCGGT-1	E14.5	9010	2649	2.54162	9193	2648	-0.0687878	-0.242556	G1	E14.5	0	0
ACAGCCGAGTGTGGCA-1	E14.5	6222	2024	2.89296	8651	2034	0.272431	-0.147167	S	E14.5	0	0
ACAGCCGCAGCTCCGA-1	E14.5	7285	2251	2.34729	8748	2250	-0.184331	-0.287177	G1	E14.5	1	1
ACAGCCGCAGGCTCAC-1	E14.5	7881	2739	2.94379	8761	2739	0.173276	0.032487	S	E14.5	1	1
ACAGCCGGTCTAGTCA-1	E14.5	11343	3381	3.82615	10048	3381	0.240231	0.15549	S	E14.5	3	3
ACAGCCGGTCTGGAGA-1	E14.5	6431	2382	3.99627	8556	2390	0.101108	-0.0605083	S	E14.5	1	1
ACAGCCGGTGCGATAG-1	E14.5	19447	4595	3.04931	10580	4092	-0.140107	0.32553	G2M	E14.5	1	1
ACAGCCGTCAAGGTAA-1	E14.5	7976	2562	3.8992	8837	2562	-0.0753663	-0.233566	G1	E14.5	3	3
ACAGCCGTCCAGAAGG-1	E14.5	6494	2213	3.66492	8635	2214	-0.013719	0.455327	G2M	E14.5	0	0
ACAGCTAAGTACACCT-1	E14.5	6795	2434	3.07579	8571	2436	-0.168379	0.722975	G2M	E14.5	0	0
ACAGCTACAAAGGCGT-1	E14.5	9234	2893	2.95647	9276	2891	0.104545	0.360236	G2M	E14.5	0	0
ACAGCTACAATCCAAC-1	E14.5	9350	2622	2.81283	9350	2622	0.320296	-0.0236673	S	E14.5	3	3
ACAGCTACATATACCG-1	E14.5	11748	2371	2.17058	9909	2370	-0.103826	-0.242379	G1	E14.5	12	12
ACAGCTATCTAACGGT-1	E14.5	17479	4191	2.75759	10430	3929	-0.230135	-0.423874	G1	E14.5	0	0
ACATACGAGCGACGTA-1	E14.5	6202	2035	3.386	8632	2040	0.143507	0.0558853	S	E14.5	6	6
ACATACGAGCGTTCCG-1	E14.5	6532	2370	2.29639	8558	2370	-0.0211224	-0.289666	G1	E14.5	6	6
ACATACGAGCTGGAAC-1	E14.5	21298	4253	2.59649	10299	3380	0.0538777	0.272873	G2M	E14.5	2	2
ACATACGCACATGTGT-1	E14.5	8139	2685	3.15764	8881	2685	-0.0642423	0.458617	G2M	E14.5	0	0
ACATACGGTCCGAACC-1	E14.5	20136	2575	1.22666	9896	1790	-0.0691487	-0.0376575	G1	E14.5	13	13
ACATACGGTTCAGACT-1	E14.5	10154	3063	2.47193	9717	3063	-0.0485176	0.387491	G2M	E14.5	17	17
ACATACGGTTGTCTTT-1	E14.5	9701	2973	2.23688	9536	2972	-0.174155	-0.16307	G1	E14.5	0	0
ACATACGGTTGTTTGG-1	E14.5	6998	2274	3.77251	8698	2274	0.048473	-0.212678	S	E14.5	11	11
ACATACGTCAACACAC-1	E14.5	6356	2175	3.77596	8599	2173	-0.0741237	-0.234801	G1	E14.5	1	1
ACATACGTCACTTCAT-1	E14.5	5865	2211	2.7451	8527	2235	-0.13695	-0.157824	G1	E14.5	4	4
ACATACGTCTACCAGA-1	E14.5	15133	3609	3.13884	10131	3501	-0.026676	0.0334605	G2M	E14.5	7	7
ACATCAGAGCTAACAA-1	E14.5	12972	3141	3.23003	10138	3129	-0.122531	0.274503	G2M	E14.5	3	3
ACATCAGAGGCGATAC-1	E14.5	26805	4535	2.71964	9549	2471	0.332644	-0.156146	S	E14.5	2	2
ACATCAGAGTCCATAC-1	E14.5	6484	2424	2.77606	8534	2426	0.281761	-0.106841	S	E14.5	0	0
ACATCAGCAATGGAGC-1	E14.5	10795	2939	2.76054	9862	2938	0.0122969	0.131364	G2M	E14.5	2	2
ACATCAGCACAACGCC-1	E14.5	35712	4896	1.86492	9573	2145	0.204016	0.0867554	S	E14.5	13	13
ACATCAGGTGAGTGAC-1	E14.5	12852	2834	3.05789	10018	2824	0.173025	-0.120264	S	E14.5	2	2
ACATCAGGTGTGTGCC-1	E14.5	15413	3183	2.37462	10126	3076	-0.0409106	0.00231573	G2M	E14.5	2	2
ACATCAGTCAGTTTGG-1	E14.5	9413	2845	2.91087	9410	2845	0.234537	-0.0244814	S	E14.5	9	9
ACATCAGTCATAGCAC-1	E14.5	6938	2176	3.38714	8690	2175	0.0887879	0.0288845	S	E14.5	0	0
ACATCAGTCCGAATGT-1	E14.5	9883	2543	2.66114	9577	2543	0.25419	-0.0586017	S	E14.5	2	2
ACATGGTAGGCATGGT-1	E14.5	15413	3869	2.47843	10237	3783	-0.149072	0.181344	G2M	E14.5	6	6
ACATGGTAGTGCCATT-1	E14.5	9860	3072	2.91075	9599	3072	-0.0892659	-0.185403	G1	E14.5	0	0
ACATGGTAGTGCTGCC-1	E14.5	9056	2484	3.24647	9198	2484	0.0596639	-0.276931	S	E14.5	2	2
ACATGGTCAAGCCGTC-1	E14.5	6777	2333	3.32005	8616	2332	0.169714	0.0648829	S	E14.5	6	6
ACATGGTCAGGAATGC-1	E14.5	9300	2695	4.09677	9304	2695	-0.114528	0.386561	G2M	E14.5	0	0
ACATGGTCATGCATGT-1	E14.5	7068	2319	2.44765	8675	2321	0.0321328	-0.16982	S	E14.5	3	3
ACATGGTGTGATAAAC-1	E14.5	26257	5326	2.99349	9914	3308	-0.178181	0.290549	G2M	E14.5	4	4
ACATGGTTCTCGAGTA-1	E14.5	20794	4728	3.08743	10484	3964	-0.22663	-0.292802	G1	E14.5	0	0
ACCAGTAAGGATATAC-1	E14.5	7979	2722	2.48151	8798	2722	0.293122	0.035691	S	E14.5	4	4
ACCAGTACAAGACGTG-1	E14.5	5876	2102	3.26753	8527	2108	-0.134342	0.453723	G2M	E14.5	0	0
ACCAGTACACGTCAGC-1	E14.5	14432	3304	2.25194	10172	3223	-0.150914	-0.243389	G1	E14.5	12	12
ACCAGTACAGCGTAAG-1	E14.5	5888	2137	2.87024	8535	2142	-0.121874	-0.21584	G1	E14.5	1	1
ACCAGTACAGGCTGAA-1	E14.5	19415	4023	2.80711	10449	3531	-0.0817113	-0.188649	G1	E14.5	7	7
ACCAGTACATGACGGA-1	E14.5	7855	2288	2.50796	8834	2285	0.23169	0.104234	S	E14.5	8	8
ACCAGTAGTATTCTCT-1	E14.5	7228	2364	2.54566	8702	2365	-0.0957578	-0.220017	G1	E14.5	4	4
ACCAGTAGTCCGAGTC-1	E14.5	7618	2333	4.02993	8783	2333	-0.13097	0.247188	G2M	E14.5	3	3
ACCAGTAGTCGCATAT-1	E14.5	18563	3361	2.09557	10131	2824	0.291615	-0.117524	S	E14.5	13	13
ACCAGTAGTCTAGGTT-1	E14.5	6382	2017	1.91163	8692	2023	0.0692192	-0.227732	S	E14.5	6	6
ACCAGTATCACCACCT-1	E14.5	7501	2322	2.81296	8784	2322	0.111386	-0.159235	S	E14.5	15	15
ACCAGTATCATGGTCA-1	E14.5	15504	3265	2.41873	10151	3139	0.165721	-0.174359	S	E14.5	14	14
ACCAGTATCCACGCAG-1	E14.5	7318	2340	3.07461	8721	2341	-0.119424	-0.207745	G1	E14.5	0	0
ACCAGTATCCCTTGCA-1	E14.5	13728	3168	2.55682	10156	3145	0.128254	0.038683	S	E14.5	2	2
ACCAGTATCTACTATC-1	E14.5	8970	2556	3.12152	9175	2556	0.106497	0.0932833	S	E14.5	4	4
ACCCACTAGAACAACT-1	E14.5	10798	2491	3.9637	9782	2490	0.114402	-0.0925746	S	E14.5	5	5
ACCCACTAGGCATGTG-1	E14.5	7869	2301	2.45266	8860	2301	-0.18043	-0.276386	G1	E14.5	12	12
ACCCACTAGGGCTCTC-1	E14.5	7699	2474	2.37693	8783	2473	0.0157431	0.412784	G2M	E14.5	0	0
ACCCACTCACCAACCG-1	E14.5	10035	2427	3.07922	9610	2427	0.151086	-0.262477	S	E14.5	2	2
ACCCACTCAGGATCGA-1	E14.5	25455	4847	2.44353	9781	2942	-0.0126653	-0.164669	G1	E14.5	2	2
ACCCACTCAGTGGGAT-1	E14.5	11326	2596	2.40155	9886	2596	0.0367808	0.0292832	S	E14.5	2	2
ACCCACTCATCACGTA-1	E14.5	12327	3442	3.80466	10159	3439	-0.0806145	0.0937002	G2M	E14.5	3	3
ACCCACTCATGCATGT-1	E14.5	22325	4855	2.92945	10292	3692	-0.131083	-0.308859	G1	E14.5	1	1
ACCCACTGTACCGTAT-1	E14.5	19412	3823	2.63754	10351	3288	-0.0268597	0.277447	G2M	E14.5	2	2
ACCCACTGTACTCAAC-1	E14.5	14951	3050	2.30754	10077	2915	-0.0727958	0.203168	G2M	E14.5	13	13
ACCCACTGTCTGCCAG-1	E14.5	10950	3201	2.71233	9943	3200	-0.0976447	-0.182231	G1	E14.5	1	1
ACCCACTGTCTTTCAT-1	E14.5	9556	2838	2.05107	9462	2837	0.0845098	0.0106422	S	E14.5	0	0
ACCCACTGTGAAGGCT-1	E14.5	6893	2149	2.53881	8679	2148	-0.139448	-0.189004	G1	E14.5	0	0
ACCCACTGTGCCTTGG-1	E14.5	11032	2692	2.75562	9866	2691	0.335272	-0.0876788	S	E14.5	2	2
ACCCACTTCAGATAAG-1	E14.5	17835	4521	2.53995	10557	4216	0.0314231	-0.3145	S	E14.5	4	4
ACCCACTTCATCTGTT-1	E14.5	5499	2044	4.50991	8437	2067	-0.0746397	-0.217992	G1	E14.5	1	1
ACCCACTTCCGTACAA-1	E14.5	15395	3866	2.26047	10210	3747	-0.123808	0.372264	G2M	E14.5	1	1
ACCGTAAAGATGCCTT-1	E14.5	8746	2623	3.44157	9076	2622	0.0328484	0.0930734	G2M	E14.5	18	18
ACCGTAAAGTGTACCT-1	E14.5	7415	2049	2.31962	8809	2047	0.0767737	-0.17828	S	E14.5	3	3
ACCGTAACAAGTTAAG-1	E14.5	10709	3193	3.19358	9903	3193	-0.134972	-0.251619	G1	E14.5	10	10
ACCGTAACAGACAAGC-1	E14.5	30942	5833	2.57256	9569	3053	-0.0949259	0.0368564	G2M	E14.5	0	0
ACCGTAATCATCTGTT-1	E14.5	7015	2346	2.82252	8663	2350	-0.135433	-0.115273	G1	E14.5	4	4
ACCGTAATCCTTGACC-1	E14.5	6563	2224	3.15405	8636	2228	-0.103216	-0.244355	G1	E14.5	9	9
ACCTTTAAGCGCCTCA-1	E14.5	17614	4082	3.04871	10448	3800	-0.165186	-0.266219	G1	E14.5	0	0
ACCTTTACAAGGACTG-1	E14.5	11142	3170	2.71944	9994	3170	-0.12318	0.456686	G2M	E14.5	1	1
ACCTTTACAGTCAGCC-1	E14.5	30643	5397	2.39533	9576	2786	-0.0435421	0.199151	G2M	E14.5	5	5
ACCTTTAGTAGCGTGA-1	E14.5	7018	2464	2.27985	8627	2464	-0.107608	-0.232454	G1	E14.5	9	9
ACCTTTAGTGACAAAT-1	E14.5	10411	3024	2.69907	9792	3024	-0.106886	0.535796	G2M	E14.5	4	4
ACCTTTAGTTACGGAG-1	E14.5	10437	2684	2.28993	9757	2684	0.0989937	-0.0102331	S	E14.5	15	15
ACCTTTATCACCGTAA-1	E14.5	16929	3948	3.2784	10392	3738	0.336886	-0.107541	S	E14.5	3	3
ACCTTTATCACGAAGG-1	E14.5	6778	2080	2.65565	8690	2080	-0.0513737	-0.202886	G1	E14.5	4	4
ACCTTTATCCCATTTA-1	E14.5	10395	2974	2.63588	9764	2974	-0.00479187	-0.104745	G1	E14.5	4	4
ACGAGCCAGTCCGGTC-1	E14.5	12996	3208	3.36257	10106	3198	-0.116909	-0.311419	G1	E14.5	3	3
ACGAGCCCAATGTAAG-1	E14.5	6255	2178	3.05356	8630	2180	0.049348	0.191639	G2M	E14.5	0	0
ACGAGCCCACGAAACG-1	E14.5	18483	3747	3.56003	10379	3349	0.115597	-0.200694	S	E14.5	7	7
ACGAGCCCATGCTAGT-1	E14.5	10571	2150	1.92981	9701	2150	0.105396	-0.0871193	S	E14.5	13	13
ACGAGCCGTACAGACG-1	E14.5	13070	2994	2.63198	10068	2972	0.24878	-0.0433782	S	E14.5	2	2
ACGAGCCGTGCACTTA-1	E14.5	15512	3183	1.90175	10084	3067	-0.0470237	0.304606	G2M	E14.5	2	2
ACGAGCCTCCCTTGTG-1	E14.5	9046	2556	3.29427	9201	2556	-0.169505	-0.271224	G1	E14.5	0	0
ACGAGCCTCCTTTCGG-1	E14.5	8436	2778	2.59602	8948	2778	0.105465	0.20172	G2M	E14.5	0	0
ACGAGCCTCTACGAGT-1	E14.5	10435	2701	3.55534	9757	2696	-0.0327021	0.0546009	G2M	E14.5	8	8
ACGAGCCTCTCGATGA-1	E14.5	6994	2117	2.1304	8711	2117	-0.167421	-0.230943	G1	E14.5	1	1
ACGAGCCTCTGATTCT-1	E14.5	6490	2208	3.26656	8607	2211	0.193141	0.0348179	S	E14.5	10	10
ACGAGCCTCTTAGAGC-1	E14.5	10215	3013	3.67107	9726	3013	-0.119646	-0.287088	G1	E14.5	0	0
ACGAGGAAGAATCTCC-1	E14.5	8898	2654	3.86604	9138	2653	0.0171472	-0.185577	S	E14.5	1	1
ACGAGGAAGCGTAGTG-1	E14.5	14738	3395	3.21618	10149	3325	0.0506176	-0.258509	S	E14.5	3	3
ACGAGGAAGTCCGGTC-1	E14.5	8022	2557	3.39068	8850	2557	-0.229102	-0.272324	G1	E14.5	0	0
ACGAGGACAACTGCGC-1	E14.5	7440	2156	2.58065	8793	2156	0.150841	-0.215058	S	E14.5	3	3
ACGAGGACACAGAGGT-1	E14.5	14771	3312	2.85695	10187	3239	0.11996	-0.0420621	S	E14.5	15	15
ACGAGGACACGTCTCT-1	E14.5	6814	2232	3.15527	8657	2235	-0.0542007	-0.235556	G1	E14.5	0	0
ACGAGGACATCGGAAG-1	E14.5	8726	2415	2.65872	9079	2415	-0.206229	-0.256614	G1	E14.5	12	12
ACGAGGAGTCACCCAG-1	E14.5	10392	2616	2.9542	9722	2615	-0.012572	-0.0372567	G1	E14.5	2	2
ACGAGGATCATCTGCC-1	E14.5	14214	3181	2.61714	10156	3117	0.441749	0.281565	S	E14.5	2	2
ACGAGGATCTGCGTAA-1	E14.5	9937	2928	2.73724	9630	2928	0.10743	0.0958067	S	E14.5	0	0
ACGATACAGAAAGTGG-1	E14.5	11230	2892	3.08994	9950	2892	0.0243339	0.399796	G2M	E14.5	14	14
ACGATACAGCGTCTAT-1	E14.5	7412	2160	3.04911	8789	2160	-0.0549308	-0.203834	G1	E14.5	5	5
ACGATACAGCTGAAAT-1	E14.5	9982	2878	2.02364	9637	2878	-0.216399	-0.298977	G1	E14.5	4	4
ACGATACCAATGGATA-1	E14.5	5213	2176	2.68559	8369	2205	-0.155258	-0.269336	G1	E14.5	9	9
ACGATACCAGACGCAA-1	E14.5	6516	2250	3.94414	8610	2252	0.200116	0.131055	S	E14.5	0	0
ACGATACCAGTTCCCT-1	E14.5	6228	2178	2.74566	8635	2181	-0.160788	-0.217841	G1	E14.5	9	9
ACGATACCATCTATGG-1	E14.5	11200	3046	3.0625	9957	3045	0.182216	-0.015683	S	E14.5	8	8
ACGATACGTAGGACAC-1	E14.5	15464	4122	2.87118	10265	4025	-0.0316244	-0.254613	G1	E14.5	1	1
ACGATACGTCGGATCC-1	E14.5	12697	3116	3.32362	10123	3109	-0.0528433	0.201742	G2M	E14.5	15	15
ACGATACGTCTCTCGT-1	E14.5	16027	3542	2.67049	10225	3371	0.0320437	0.000120322	S	E14.5	16	16
ACGATACGTTTGGGCC-1	E14.5	8943	2783	2.69485	9151	2783	-0.105471	-0.251906	G1	E14.5	0	0
ACGATACTCACCTCGT-1	E14.5	18796	3766	2.43669	10393	3346	0.0479929	0.242602	G2M	E14.5	16	16
ACGATACTCCTTCAAT-1	E14.5	30997	5524	2.56154	9536	2850	-0.03268	-0.183965	G1	E14.5	11	11
ACGATACTCCTTTCTC-1	E14.5	6423	2125	2.83357	8627	2126	0.0689854	-0.2958	S	E14.5	3	3
ACGATACTCGCCAGCA-1	E14.5	8093	2647	2.89139	8850	2647	0.0305128	0.209853	G2M	E14.5	0	0
ACGATACTCTCTGAGA-1	E14.5	10747	2715	2.84731	9826	2714	0.084716	-0.0576033	S	E14.5	2	2
ACGATGTAGTGGTCCC-1	E14.5	11432	2762	1.95941	9960	2762	0.179858	-0.251653	S	E14.5	2	2
ACGATGTCACTGCCAG-1	E14.5	8532	2550	2.8481	9013	2550	0.219556	-0.00436511	S	E14.5	1	1
ACGATGTCAGCTGGCT-1	E14.5	7749	2425	2.40031	8791	2425	-0.140196	-0.161073	G1	E14.5	0	0
ACGATGTCATAAGACA-1	E14.5	7506	2404	3.30402	8746	2404	-0.132122	-0.301016	G1	E14.5	4	4
ACGATGTGTGGTCCGT-1	E14.5	7293	2445	2.64637	8673	2445	-0.0809433	-0.268986	G1	E14.5	1	1
ACGATGTGTGTGACCC-1	E14.5	9498	2560	2.34786	9431	2558	0.14308	-0.0357791	S	E14.5	0	0
ACGATGTGTTCCATGA-1	E14.5	19203	3964	2.92663	10399	3528	-0.187326	-0.0521099	G1	E14.5	7	7
ACGATGTGTTGATTGC-1	E14.5	8620	2560	3.22506	9048	2560	-0.147805	-0.254011	G1	E14.5	0	0
ACGATGTTCAAACAAG-1	E14.5	6212	2270	3.0425	8575	2273	0.078155	0.253256	G2M	E14.5	4	4
ACGATGTTCTAGCACA-1	E14.5	8830	2644	2.84258	9119	2643	-0.1265	-0.296621	G1	E14.5	0	0
ACGCAGCAGCGCTCCA-1	E14.5	20842	4395	2.99875	10386	3624	0.0218929	0.456185	G2M	E14.5	6	6
ACGCAGCAGCTCAACT-1	E14.5	8399	2662	3.02417	8942	2662	0.149857	0.172566	G2M	E14.5	1	1
ACGCAGCAGGCTACGA-1	E14.5	8388	2686	2.42012	8943	2686	-0.114992	0.0124294	G2M	E14.5	0	0
ACGCAGCCACCAGATT-1	E14.5	17136	4265	2.73109	10417	4020	-0.0738732	-0.335585	G1	E14.5	0	0
ACGCAGCCAGCCACCA-1	E14.5	10482	2583	2.70941	9751	2583	0.108598	-0.118188	S	E14.5	2	2
ACGCAGCGTCTCCACT-1	E14.5	9466	2662	2.9157	9423	2662	-0.053867	-0.197596	G1	E14.5	6	6
ACGCAGCGTCTTGCGG-1	E14.5	20805	4017	2.30714	10280	3238	0.159371	0.0722856	S	E14.5	7	7
ACGCAGCGTTGGGACA-1	E14.5	6201	2236	3.54781	8587	2241	0.0378037	-0.147158	S	E14.5	1	1
ACGCAGCTCACAATGC-1	E14.5	14588	3318	3.00247	10232	3238	-0.00669845	0.220577	G2M	E14.5	16	16
ACGCAGCTCATGCTCC-1	E14.5	7418	2289	3.62631	8753	2288	-0.0929724	-0.27147	G1	E14.5	1	1
ACGCAGCTCCACGTGG-1	E14.5	22968	5046	2.84744	10321	3772	-0.131134	0.163919	G2M	E14.5	1	1
ACGCAGCTCCTGTAGA-1	E14.5	9864	3088	3.36577	9615	3088	-0.193999	-0.288637	G1	E14.5	1	1
ACGCAGCTCGAATGCT-1	E14.5	6245	2086	3.29864	8632	2094	-0.153177	-0.246082	G1	E14.5	1	1
ACGCAGCTCGCAGGCT-1	E14.5	19478	4209	3.26522	10450	3628	-0.224244	-0.181786	G1	E14.5	18	18
ACGCAGCTCTCAAGTG-1	E14.5	9132	2753	3.43846	9228	2753	0.266457	-0.0515286	S	E14.5	1	1
ACGCAGCTCTGGTTCC-1	E14.5	7227	2016	3.45925	8803	2018	0.182447	-0.0774656	S	E14.5	3	3
ACGCCAGAGACGCACA-1	E14.5	32036	5399	2.51904	9601	2752	-0.0685154	0.136778	G2M	E14.5	7	7
ACGCCAGAGCGTTTAC-1	E14.5	16083	3658	2.82907	10228	3519	0.216852	-0.220783	S	E14.5	2	2
ACGCCAGCACCAGCAC-1	E14.5	21635	4369	3.16154	10403	3476	0.205952	0.029141	S	E14.5	3	3
ACGCCAGCAGCTGTTA-1	E14.5	10964	3085	2.80007	9928	3085	-0.123411	0.393745	G2M	E14.5	3	3
ACGCCAGCATTGCGGC-1	E14.5	9415	2773	2.4854	9413	2773	-0.0263893	-0.250793	G1	E14.5	0	0
ACGCCAGGTATATCCG-1	E14.5	7085	2081	3.11927	8752	2081	0.0908339	-0.170911	S	E14.5	5	5
ACGCCAGGTGATGCCC-1	E14.5	9302	2725	3.51537	9304	2725	-0.0327532	-0.205995	G1	E14.5	1	1
ACGCCAGGTTCGCGAC-1	E14.5	7580	2243	4.03694	8795	2243	0.0450565	0.0833719	G2M	E14.5	3	3
ACGCCAGTCAGAGGTG-1	E14.5	6425	2268	4.26459	8600	2270	-0.185667	-0.272422	G1	E14.5	1	1
ACGCCAGTCGTCTGCT-1	E14.5	7995	2470	3.202	8864	2469	-0.140348	-0.271654	G1	E14.5	0	0
ACGCCAGTCTCAACTT-1	E14.5	10621	2986	1.99605	9836	2985	-0.0884281	0.646495	G2M	E14.5	4	4
ACGCCAGTCTCTGAGA-1	E14.5	9121	2858	3.19044	9232	2857	-0.223564	-0.282744	G1	E14.5	1	1
ACGCCGAAGACTAGGC-1	E14.5	9904	3037	3.35218	9619	3037	-0.0222818	-0.245042	G1	E14.5	0	0
ACGCCGAAGCTCCTTC-1	E14.5	5566	2191	2.46137	8395	2210	-0.183944	-0.246953	G1	E14.5	1	1
ACGCCGAAGTGAATTG-1	E14.5	6406	2327	2.84109	8595	2331	-0.00642645	-0.345386	G1	E14.5	1	1
ACGCCGACAATGAATG-1	E14.5	8590	2475	3.27125	9046	2475	0.174509	-0.0117925	S	E14.5	0	0
ACGCCGACACACAGAG-1	E14.5	6157	2206	2.5337	8586	2213	-0.135205	-0.248505	G1	E14.5	1	1
ACGCCGACATGTAGTC-1	E14.5	8123	2556	2.59756	8880	2555	-0.167493	-0.0986991	G1	E14.5	0	0
ACGCCGAGTAGGCTGA-1	E14.5	7538	2313	3.42266	8796	2313	0.104324	-0.0611099	S	E14.5	3	3
ACGCCGAGTCGTCTTC-1	E14.5	11373	2819	2.82247	9953	2818	-0.0303343	-0.255303	G1	E14.5	8	8
ACGCCGAGTGCAGACA-1	E14.5	8748	2239	3.21216	9103	2238	-0.0178262	-0.147546	G1	E14.5	8	8
ACGCCGAGTTAAGTAG-1	E14.5	14798	3429	2.70983	10155	3348	-0.164932	0.212661	G2M	E14.5	2	2
ACGCCGATCATAGCAC-1	E14.5	15253	3629	0.865404	10220	3546	-0.0525878	0.194873	G2M	E14.5	3	3
ACGCCGATCGTTACGA-1	E14.5	7662	2286	2.94962	8808	2285	0.141742	-0.210905	S	E14.5	1	1
ACGCCGATCTCGTTTA-1	E14.5	22068	4464	3.38952	10308	3475	0.229777	0.0692287	S	E14.5	2	2
ACGGAGAAGATGTGTA-1	E14.5	28244	5625	3.16173	9615	3112	-0.1115	0.0791541	G2M	E14.5	4	4
ACGGAGAAGGATGGTC-1	E14.5	5830	2079	3.44768	8549	2089	0.0797474	-0.189098	S	E14.5	0	0
ACGGAGACAATCTACG-1	E14.5	7013	2402	3.17981	8670	2402	-0.16402	-0.249587	G1	E14.5	0	0
ACGGAGACACCATCCT-1	E14.5	11124	2974	3.49694	9936	2974	0.293439	-0.0881498	S	E14.5	3	3
ACGGAGACATGCTAGT-1	E14.5	10443	2981	3.2845	9782	2981	-0.14455	-0.34895	G1	E14.5	1	1
ACGGAGAGTAAGTAGT-1	E14.5	35819	5855	2.63268	9675	2940	0.0337503	0.0851476	G2M	E14.5	4	4
ACGGAGAGTCTAGTGT-1	E14.5	5982	2056	3.51053	8575	2068	0.221978	-0.0966853	S	E14.5	7	7
ACGGAGATCATGTAGC-1	E14.5	11387	2849	2.57311	9971	2844	-0.0580612	0.389395	G2M	E14.5	8	8
ACGGAGATCTGGGCCA-1	E14.5	6376	2090	2.94856	8655	2095	0.14318	0.0563164	S	E14.5	6	6
ACGGCCACAGCTGGCT-1	E14.5	8711	2458	3.22581	9080	2458	0.349354	-0.11864	S	E14.5	3	3
ACGGCCACATCGGACC-1	E14.5	7231	2247	3.13926	8736	2247	0.116834	-0.0974215	S	E14.5	0	0
ACGGCCACATGGTTGT-1	E14.5	17609	3944	3.60611	10398	3673	0.17268	0.0464424	S	E14.5	5	5
ACGGCCAGTGTATGGG-1	E14.5	10351	2547	2.792	9705	2547	0.0400582	-0.076818	S	E14.5	2	2
ACGGCCAGTTGTTTGG-1	E14.5	7702	2157	1.88263	8851	2156	-0.152992	-0.0905634	G1	E14.5	2	2
ACGGCCATCAATCACG-1	E14.5	12041	3273	2.45827	10094	3271	-0.118757	-0.312003	G1	E14.5	0	0
ACGGCCATCGCAGGCT-1	E14.5	14493	3597	2.80135	10236	3549	0.118654	-0.095861	S	E14.5	3	3
ACGGCCATCGGCGGTT-1	E14.5	7151	2140	3.78968	8734	2140	0.227444	-0.0809839	S	E14.5	3	3
ACGGCCATCTTCCTTC-1	E14.5	14310	2941	3.41719	10114	2867	-0.116441	-0.255917	G1	E14.5	2	2
ACGGGCTAGACTCGGA-1	E14.5	28411	5267	2.87917	9747	2894	0.215546	-0.108474	S	E14.5	5	5
ACGGGCTAGCTTATCG-1	E14.5	8154	2179	2.91881	8950	2179	-0.144185	-0.0474627	G1	E14.5	2	2
ACGGGCTAGGGTTTCT-1	E14.5	7929	2501	2.64851	8826	2501	-0.115058	-0.230393	G1	E14.5	1	1
ACGGGCTCACATCTTT-1	E14.5	7612	2431	2.79821	8755	2430	-0.139781	-0.27368	G1	E14.5	0	0
ACGGGCTCAGGCTCAC-1	E14.5	5565	2167	3.32435	8414	2178	-0.181306	-0.216204	G1	E14.5	9	9
ACGGGCTGTAAACGCG-1	E14.5	12819	3149	2.96435	10129	3133	-0.154092	-0.258441	G1	E14.5	11	11
ACGGGCTGTCGGCACT-1	E14.5	13220	2288	2.2466	9959	2242	-0.14872	-0.135868	G1	E14.5	2	2
ACGGGCTTCACCGTAA-1	E14.5	10043	2753	2.9772	9649	2752	-0.188026	-0.237588	G1	E14.5	0	0
ACGGGCTTCAGTTCGA-1	E14.5	12606	3278	2.77646	10131	3273	-0.119939	0.311792	G2M	E14.5	0	0
ACGGGCTTCTGCTTGC-1	E14.5	8455	2467	2.95683	8996	2467	0.0538995	0.0522702	S	E14.5	5	5
ACGGGCTTCTGTTGAG-1	E14.5	8172	2534	3.47528	8919	2534	-0.122775	-0.134408	G1	E14.5	0	0
ACGGGTCAGGATGGAA-1	E14.5	11678	3211	2.92858	10032	3211	0.257192	-0.127306	S	E14.5	0	0
ACGGGTCCAGTGACAG-1	E14.5	12458	3454	3.08236	10201	3444	0.00267258	-0.130039	S	E14.5	8	8
ACGGGTCGTAGCAAAT-1	E14.5	22447	4803	2.92689	10327	3671	-0.0385943	0.442073	G2M	E14.5	0	0
ACGGGTCGTCGACTAT-1	E14.5	9972	3018	2.52708	9661	3018	-0.21083	-0.263022	G1	E14.5	1	1
ACGGGTCGTGAAAGAG-1	E14.5	6367	2067	2.07319	8643	2069	-0.0909099	-0.135307	G1	E14.5	6	6
ACGGGTCTCAACACCA-1	E14.5	10484	2698	3.63411	9768	2695	-0.18448	-0.305175	G1	E14.5	11	11
ACGGGTCTCCAGTATG-1	E14.5	6042	2074	2.49917	8586	2081	-0.0815543	0.502364	G2M	E14.5	4	4
ACGGGTCTCGGTCTAA-1	E14.5	7009	2284	2.55386	8700	2284	0.153897	0.0877515	S	E14.5	6	6
ACGTCAAAGAATCTCC-1	E14.5	6715	2213	3.39538	8640	2215	-0.0415303	-0.237884	G1	E14.5	9	9
ACGTCAAAGACTACAA-1	E14.5	10911	3111	2.91449	9930	3109	-0.212109	-0.306026	G1	E14.5	11	11
ACGTCAAAGTATGACA-1	E14.5	8316	2392	2.7417	8957	2392	-0.17409	0.589591	G2M	E14.5	4	4
ACGTCAAAGTGACATA-1	E14.5	6254	2370	3.77358	8558	2371	0.0939668	0.0528424	S	E14.5	1	1
ACGTCAACACCGATAT-1	E14.5	12754	3580	2.68151	10200	3574	-0.271032	-0.301954	G1	E14.5	0	0
ACGTCAACATCGTCGG-1	E14.5	7088	2082	3.08973	8772	2082	-0.107796	-0.259747	G1	E14.5	3	3
ACGTCAAGTACATGTC-1	E14.5	28151	5550	2.6571	9604	3090	-0.0238174	0.29851	G2M	E14.5	1	1
ACGTCAAGTCATTAGC-1	E14.5	5934	2004	2.8817	8606	2013	-0.0732883	-0.319878	G1	E14.5	1	1
ACGTCAAGTGAAAGAG-1	E14.5	6477	2037	3.72086	8646	2039	-0.131157	-0.230237	G1	E14.5	3	3
ACGTCAATCCGCGTTT-1	E14.5	9155	2781	3.14582	9244	2781	-0.260231	-0.222448	G1	E14.5	5	5
ACGTCAATCCTACAGA-1	E14.5	16308	3490	2.50797	10257	3319	-0.00906887	-0.329564	G1	E14.5	7	7
ACGTCAATCGGTCTAA-1	E14.5	9001	2432	2.34418	9190	2432	0.22575	-0.081512	S	E14.5	6	6
ACTATCTAGAAGGACA-1	E14.5	16265	3040	2.0289	10094	2773	-0.115201	-0.210379	G1	E14.5	13	13
ACTATCTAGCATGGCA-1	E14.5	16275	3795	2.5192	10297	3615	0.12022	0.0186979	S	E14.5	18	18
ACTATCTAGCGCCTTG-1	E14.5	10664	3009	3.92911	9839	3009	-0.111172	-0.097382	G1	E14.5	0	0
ACTATCTAGTAATCCC-1	E14.5	7325	2287	3.01706	8733	2287	0.252555	-0.0626187	S	E14.5	1	1
ACTATCTCAAGTCATC-1	E14.5	10265	2291	1.96785	9674	2290	-0.0459972	-0.149469	G1	E14.5	13	13
ACTATCTGTACCATCA-1	E14.5	14004	3386	3.12054	10218	3353	0.229681	-0.0879375	S	E14.5	2	2
ACTATCTGTCAGAATA-1	E14.5	14441	3640	2.97071	10244	3602	-0.144189	0.101169	G2M	E14.5	4	4
ACTATCTGTCGACTGC-1	E14.5	8962	2522	3.10199	9178	2522	-0.0786443	0.144507	G2M	E14.5	3	3
ACTATCTGTCGCATCG-1	E14.5	11295	2526	3.01018	9859	2525	0.162159	-0.197095	S	E14.5	2	2
ACTATCTGTCTACCTC-1	E14.5	7834	2406	2.88486	8812	2406	-0.00690329	0.322848	G2M	E14.5	10	10
ACTATCTGTGGCAAAC-1	E14.5	9202	2691	2.72767	9273	2691	-0.0748648	0.497065	G2M	E14.5	0	0
ACTATCTGTGTGACGA-1	E14.5	8284	2364	2.41429	8941	2363	-0.126957	-0.231401	G1	E14.5	3	3
ACTATCTGTGTGCGTC-1	E14.5	11606	2998	3.54989	10005	2997	0.136772	0.266437	G2M	E14.5	3	3
ACTATCTGTTGAGGTG-1	E14.5	13492	3224	2.24578	10189	3200	-0.0414271	0.192768	G2M	E14.5	0	0
ACTATCTGTTTCGCTC-1	E14.5	6851	2223	4.34973	8653	2225	-0.0988534	-0.25312	G1	E14.5	6	6
ACTATCTTCTACTTAC-1	E14.5	12827	2881	2.55711	10039	2869	0.133495	-0.124895	S	E14.5	2	2
ACTATCTTCTGTTTGT-1	E14.5	24725	5193	2.60465	9996	3423	-0.11292	-0.0775247	G1	E14.5	0	0
ACTGAACAGATCCCAT-1	E14.5	14489	2907	2.86424	10055	2822	-0.140559	0.205987	G2M	E14.5	2	2
ACTGAACAGCAGACTG-1	E14.5	6520	2223	3.2362	8627	2224	0.0974862	0.0869967	S	E14.5	0	0
ACTGAACAGGACACCA-1	E14.5	13742	2955	2.6852	10093	2925	0.0300521	0.0574266	G2M	E14.5	2	2
ACTGAACAGGCAGTCA-1	E14.5	23600	4922	3.00847	10161	3514	-0.17133	-0.2839	G1	E14.5	0	0
ACTGAACTCAGGATCT-1	E14.5	6633	2515	3.72381	8554	2518	0.19625	0.0447415	S	E14.5	1	1
ACTGAACTCCACGTTC-1	E14.5	6657	2036	3.74042	8653	2039	0.258576	0.270934	G2M	E14.5	14	14
ACTGAACTCCGTCAAA-1	E14.5	10133	2708	3.32577	9679	2704	0.0823533	0.192889	G2M	E14.5	14	14
ACTGAACTCGGGAGTA-1	E14.5	10680	2891	2.70599	9833	2891	-0.165907	-0.00202068	G1	E14.5	15	15
ACTGAACTCTACTCAT-1	E14.5	14033	3689	2.80054	10280	3655	0.333002	0.153913	S	E14.5	4	4
ACTGAGTAGGCTCATT-1	E14.5	15436	3423	2.993	10130	3306	0.0235842	0.502103	G2M	E14.5	2	2
ACTGAGTCAAGAAAGG-1	E14.5	9533	2842	2.55953	9449	2842	-0.14856	0.015608	G2M	E14.5	3	3
ACTGAGTCAAGTTCTG-1	E14.5	7285	2561	2.55319	8665	2561	-0.136303	0.751247	G2M	E14.5	1	1
ACTGAGTCACTTAAGC-1	E14.5	9993	3018	3.06214	9654	3018	0.0376337	0.643641	G2M	E14.5	0	0
ACTGAGTCAGGGTATG-1	E14.5	9223	2741	3.65391	9285	2740	-0.153303	-0.367762	G1	E14.5	4	4
ACTGAGTTCAACCAAC-1	E14.5	7017	2337	3.32051	8674	2338	-0.222934	-0.211286	G1	E14.5	1	1
ACTGAGTTCATTCACT-1	E14.5	26639	5006	2.59394	9574	2801	-0.00536796	0.0157186	G2M	E14.5	4	4
ACTGAGTTCCTTCAAT-1	E14.5	17076	3924	2.93394	10352	3696	-0.039658	-0.24023	G1	E14.5	16	16
ACTGAGTTCGTATCAG-1	E14.5	6788	2248	3.40306	8655	2250	-0.131356	-0.191044	G1	E14.5	0	0
ACTGATGAGAGGTTAT-1	E14.5	22631	4356	3.05775	10239	3221	-0.0475633	0.305611	G2M	E14.5	7	7
ACTGATGCAAAGCGGT-1	E14.5	9621	3048	3.21172	9499	3048	-0.192172	-0.230267	G1	E14.5	0	0
ACTGATGCAATTGCTG-1	E14.5	9049	2229	3.82363	9222	2229	-0.0968786	-0.205449	G1	E14.5	2	2
ACTGATGCACAGACAG-1	E14.5	8662	2503	3.03625	9059	2501	-0.132923	-0.142825	G1	E14.5	5	5
ACTGATGCATTGGCGC-1	E14.5	6144	2122	2.88086	8611	2128	-0.0802253	-0.227446	G1	E14.5	0	0
ACTGATGGTCTTCAAG-1	E14.5	7518	2325	2.67358	8760	2326	0.323705	-0.0456509	S	E14.5	6	6
ACTGATGGTGAGTATA-1	E14.5	23897	4534	2.56518	10053	3096	0.0924693	-0.183562	S	E14.5	7	7
ACTGATGGTGCGATAG-1	E14.5	17215	3473	2.614	10299	3236	0.00900474	0.344217	G2M	E14.5	2	2
ACTGATGTCAAACCAC-1	E14.5	8194	2369	2.79473	8939	2369	-0.00523018	-0.189267	G1	E14.5	3	3
ACTGATGTCCTGTACC-1	E14.5	5816	2078	3.50757	8534	2091	-0.149335	-0.318767	G1	E14.5	0	0
ACTGATGTCGGTGTCG-1	E14.5	19288	4408	2.71153	10466	3875	-0.228926	-0.339792	G1	E14.5	0	0
ACTGATGTCTACTCAT-1	E14.5	14225	3799	1.99649	10361	3763	-0.179594	0.364053	G2M	E14.5	1	1
ACTGATGTCTGTTTGT-1	E14.5	14886	3802	3.1103	10217	3710	-0.232339	-0.265093	G1	E14.5	4	4
ACTGCTCAGGAGCGTT-1	E14.5	6502	2123	3.07598	8635	2126	-0.113853	-0.258784	G1	E14.5	0	0
ACTGCTCTCTGCGACG-1	E14.5	8318	2403	3.35417	8970	2402	0.163295	-0.0903239	S	E14.5	3	3
ACTGTCCCAATCAGAA-1	E14.5	8825	2728	1.84703	9093	2728	0.0199876	0.400678	G2M	E14.5	6	6
ACTGTCCCAGCCTTTC-1	E14.5	15846	3915	2.04468	10297	3759	-0.171806	0.763112	G2M	E14.5	0	0
ACTGTCCCAGGTCGTC-1	E14.5	10051	2535	2.95493	9629	2535	0.133575	-0.0332141	S	E14.5	2	2
ACTGTCCGTCAAACTC-1	E14.5	16657	3920	2.67755	10346	3756	-0.0434086	-0.237186	G1	E14.5	4	4
ACTGTCCTCCTTTACA-1	E14.5	14818	3672	3.44176	10240	3564	-0.27043	-0.2356	G1	E14.5	11	11
ACTGTCCTCGCCAGCA-1	E14.5	5713	2174	3.23823	8474	2197	0.119076	-0.17231	S	E14.5	1	1
ACTTACTAGATCCGAG-1	E14.5	16906	3571	2.75642	10291	3349	0.020122	-0.231835	S	E14.5	7	7
ACTTACTAGTCACGCC-1	E14.5	5303	2041	2.4703	8459	2070	-0.115066	0.33674	G2M	E14.5	1	1
ACTTACTCAGTACACT-1	E14.5	21351	4476	3.30195	10291	3550	-0.130595	0.190583	G2M	E14.5	2	2
ACTTACTCATAGGATA-1	E14.5	5744	2096	2.83774	8472	2111	-0.0864732	-0.186531	G1	E14.5	4	4
ACTTACTCATGCAATC-1	E14.5	8897	2681	3.02349	9143	2681	-0.124341	-0.00454587	G1	E14.5	4	4
ACTTACTGTGGCCCTA-1	E14.5	9472	2615	2.40709	9428	2614	0.182279	-0.211351	S	E14.5	15	15
ACTTACTTCACTTCAT-1	E14.5	6105	2125	2.96478	8609	2132	-0.118341	-0.222739	G1	E14.5	4	4
ACTTACTTCCATGAGT-1	E14.5	5282	2108	2.30973	8406	2142	0.02035	-0.168654	S	E14.5	4	4
ACTTACTTCGGCGCAT-1	E14.5	10088	2895	2.14116	9696	2895	-0.157534	0.577579	G2M	E14.5	6	6
ACTTGTTAGGCTAGAC-1	E14.5	19211	4691	2.81609	10613	4205	0.0585098	0.33083	G2M	E14.5	10	10
ACTTGTTAGTGAAGAG-1	E14.5	9318	2454	2.72591	9319	2454	0.193512	0.0331779	S	E14.5	2	2
ACTTGTTCACATTTCT-1	E14.5	13039	3038	2.23177	10114	3026	0.0292535	0.257842	G2M	E14.5	2	2
ACTTGTTCAGGCGATA-1	E14.5	9233	2845	2.66436	9268	2844	-0.103841	-0.304692	G1	E14.5	1	1
ACTTGTTGTAAGAGAG-1	E14.5	6568	2153	3.77588	8623	2155	-0.0890993	-0.205556	G1	E14.5	4	4
ACTTGTTGTACGCACC-1	E14.5	7284	2324	2.27897	8728	2325	-0.0473866	-0.23463	G1	E14.5	17	17
ACTTGTTGTCTGCAAT-1	E14.5	6736	2109	2.47922	8674	2112	0.0125324	-0.221749	S	E14.5	5	5
ACTTTCAAGAATCTCC-1	E14.5	5587	2080	3.06068	8483	2104	-0.0905245	-0.261636	G1	E14.5	1	1
ACTTTCAAGGACGAAA-1	E14.5	33918	5923	2.57975	9783	3025	0.140165	0.280128	G2M	E14.5	5	5
ACTTTCAAGTCATGCT-1	E14.5	5510	2072	3.41198	8450	2086	-0.166526	-0.222573	G1	E14.5	1	1
ACTTTCACAAGTCATC-1	E14.5	10313	2850	3.8786	9733	2850	0.0920099	0.0819586	S	E14.5	2	2
ACTTTCACAGGTGCCT-1	E14.5	6797	2151	2.33927	8662	2151	-0.065026	-0.216113	G1	E14.5	5	5
ACTTTCAGTCTAGTGT-1	E14.5	6659	2298	2.4328	8597	2300	-0.145407	-0.257279	G1	E14.5	9	9
ACTTTCAGTCTCTTTA-1	E14.5	7258	2304	2.75558	8709	2304	-0.0645134	-0.050432	G1	E14.5	10	10
ACTTTCAGTGTTTGTG-1	E14.5	10925	3084	3.00229	9890	3083	0.0898141	-0.0761233	S	E14.5	1	1
ACTTTCAGTTCTGGTA-1	E14.5	7402	2320	3.62064	8746	2319	-0.0366066	-0.131624	G1	E14.5	15	15
ACTTTCAGTTTGGGCC-1	E14.5	7681	2469	2.46062	8764	2469	0.00280902	-0.22944	S	E14.5	0	0
ACTTTCATCGTCGTTC-1	E14.5	8666	2636	2.53866	9050	2636	0.0956453	-0.185705	S	E14.5	10	10
ACTTTCATCTATCCTA-1	E14.5	19057	4280	2.39807	10506	3851	-0.186064	0.409381	G2M	E14.5	4	4
ACTTTCATCTGGTGTA-1	E14.5	6157	2232	1.90028	8592	2237	-0.18466	-0.28059	G1	E14.5	0	0
AGAATAGAGAATTGTG-1	E14.5	24506	4774	2.30148	9978	3157	0.0040364	0.162901	G2M	E14.5	6	6
AGAATAGAGAGAGCTC-1	E14.5	9811	2493	3.13933	9552	2493	-0.0536994	0.344297	G2M	E14.5	0	0
AGAATAGAGTCGAGTG-1	E14.5	12510	3024	3.78897	10078	3024	-0.181745	0.211787	G2M	E14.5	2	2
AGAATAGCAATCTACG-1	E14.5	16521	3969	2.5967	10357	3805	-0.0487011	0.156053	G2M	E14.5	4	4
AGAATAGGTCCCGACA-1	E14.5	15927	3581	3.13304	10267	3427	-0.171014	-0.280807	G1	E14.5	2	2
AGAATAGGTGGTAACG-1	E14.5	19179	3903	2.42974	10436	3459	0.0169654	-0.0984024	S	E14.5	7	7
AGAATAGTCCCTGACT-1	E14.5	6421	2349	4.71889	8537	2353	0.0981513	0.0302839	S	E14.5	15	15
AGACGTTAGCGATATA-1	E14.5	10288	2529	3.01322	9693	2529	0.249352	0.0517977	S	E14.5	2	2
AGACGTTAGCTGGAAC-1	E14.5	5457	2102	4.58127	8460	2140	-0.142549	-0.263954	G1	E14.5	5	5
AGACGTTAGGATGGAA-1	E14.5	9047	2690	3.68078	9200	2690	-0.113374	-0.265532	G1	E14.5	0	0
AGACGTTCAGAGCCAA-1	E14.5	9306	2635	3.11627	9307	2634	0.0724101	-0.154187	S	E14.5	1	1
AGACGTTGTCCATGAT-1	E14.5	6557	2079	2.95867	8664	2078	-0.199016	-0.269568	G1	E14.5	0	0
AGACGTTGTTCAGTAC-1	E14.5	6676	2390	3.10066	8578	2392	0.138267	-0.0536573	S	E14.5	1	1
AGACGTTTCACCCTCA-1	E14.5	21088	4252	2.79306	10457	3476	0.170947	-0.213604	S	E14.5	5	5
AGACGTTTCAGGCCCA-1	E14.5	9462	2742	2.3568	9433	2742	0.0236753	0.588518	G2M	E14.5	6	6
AGACGTTTCCACTCCA-1	E14.5	5658	2180	4.11806	8456	2195	-0.164267	-0.273627	G1	E14.5	0	0
AGACGTTTCTGTCTCG-1	E14.5	10698	3137	3.01926	9874	3136	0.224559	-0.162918	S	E14.5	9	9
AGAGCGAAGCAGCCTC-1	E14.5	16262	3784	3.20994	10329	3647	0.0513254	0.0164296	S	E14.5	3	3
AGAGCGAAGCCACGTC-1	E14.5	7511	2233	2.48968	8817	2233	-0.153308	-0.170108	G1	E14.5	1	1
AGAGCGAAGGCCCTCA-1	E14.5	16307	3667	3.79592	10284	3496	0.11558	-0.144444	S	E14.5	7	7
AGAGCGAAGTAGCCGA-1	E14.5	11136	2650	2.57723	9854	2649	0.243012	-0.177881	S	E14.5	2	2
AGAGCGAAGTTCGATC-1	E14.5	5692	2038	3.32045	8497	2057	-0.101156	-0.173474	G1	E14.5	1	1
AGAGCGACAATAACGA-1	E14.5	7262	2349	3.1534	8698	2350	0.0913583	-0.241832	S	E14.5	14	14
AGAGCGACACTGTTAG-1	E14.5	9457	2775	3.33087	9420	2774	-0.00153337	-0.228402	G1	E14.5	0	0
AGAGCGACATCACGAT-1	E14.5	8269	2294	3.02334	8970	2294	-0.0491014	-0.199932	G1	E14.5	3	3
AGAGCGACATTCACTT-1	E14.5	12477	3059	2.45251	10074	3057	0.150189	0.000959465	S	E14.5	6	6
AGAGCGAGTACCTACA-1	E14.5	5716	2218	2.48425	8445	2230	0.175341	-0.190032	S	E14.5	17	17
AGAGCGAGTATAAACG-1	E14.5	9614	2450	3.38049	9480	2450	-0.113538	-0.169321	G1	E14.5	12	12
AGAGCGAGTCAGCTAT-1	E14.5	6693	2154	4.78111	8649	2154	0.0839341	-0.14067	S	E14.5	1	1
AGAGCGAGTCCCGACA-1	E14.5	5506	2030	3.66873	8468	2053	-0.0415985	-0.209372	G1	E14.5	1	1
AGAGCGAGTGACCAAG-1	E14.5	6820	2353	2.3607	8609	2352	-0.190412	-0.28787	G1	E14.5	1	1
AGAGCGAGTTCACCTC-1	E14.5	8211	2653	2.4114	8873	2651	0.0884693	0.258819	G2M	E14.5	14	14
AGAGCGATCCTAAGTG-1	E14.5	18352	4367	3.07323	10510	3998	-0.253682	-0.312571	G1	E14.5	0	0
AGAGCGATCGAGAACG-1	E14.5	9153	2924	3.58352	9249	2924	0.0469501	-0.150653	S	E14.5	0	0
AGAGCGATCTGAGTGT-1	E14.5	11911	3318	3.14835	10084	3318	0.00932643	-0.00114216	S	E14.5	1	1
AGAGCGATCTGCCCTA-1	E14.5	10551	2991	2.7296	9811	2991	-0.186927	0.0274559	G2M	E14.5	1	1
AGAGCTTAGCGAGAAA-1	E14.5	9181	2752	1.99325	9262	2752	0.0747545	0.381809	G2M	E14.5	1	1
AGAGCTTAGGACCACA-1	E14.5	6004	2075	3.38108	8602	2088	-0.0518082	-0.270591	G1	E14.5	10	10
AGAGCTTAGGGCACTA-1	E14.5	6498	2135	2.09295	8637	2136	-0.0743206	0.0234137	G2M	E14.5	1	1
AGAGCTTAGGGCTTCC-1	E14.5	18177	3833	2.49766	10383	3470	0.0296598	0.0945951	G2M	E14.5	5	5
AGAGCTTAGTGGGTTG-1	E14.5	16610	3573	3.17279	10249	3379	0.119275	0.245543	G2M	E14.5	4	4
AGAGCTTAGTTAGGTA-1	E14.5	6563	2106	4.02255	8646	2112	-0.0915574	-0.199804	G1	E14.5	4	4
AGAGCTTCAAGAAAGG-1	E14.5	14042	3877	3.57499	10371	3830	0.0530077	0.0941483	G2M	E14.5	4	4
AGAGCTTGTCCTCCAT-1	E14.5	5958	2287	2.55119	8507	2299	0.0494177	0.622918	G2M	E14.5	1	1
AGAGCTTGTGCTAGCC-1	E14.5	17110	3711	2.8872	10348	3463	0.256679	-0.00278852	S	E14.5	7	7
AGAGCTTGTTCTGTTT-1	E14.5	17334	4091	3.99215	10366	3808	0.00899571	-0.304676	S	E14.5	0	0
AGAGCTTTCACCGGGT-1	E14.5	17053	3588	2.02897	10341	3386	-0.0585933	-0.0607228	G1	E14.5	7	7
AGAGCTTTCTGATACG-1	E14.5	6418	2152	3.16298	8631	2152	0.219018	-0.132175	S	E14.5	0	0
AGAGCTTTCTGTTTGT-1	E14.5	8735	2558	3.57184	9076	2557	-0.0386194	0.245894	G2M	E14.5	12	12
AGAGTGGAGCGACGTA-1	E14.5	12205	3000	2.44982	10053	2995	-0.185903	-0.325706	G1	E14.5	12	12
AGAGTGGAGGGATGGG-1	E14.5	10107	2499	2.32512	9642	2499	-0.0909536	0.285017	G2M	E14.5	2	2
AGAGTGGCAGGGTATG-1	E14.5	17064	3746	2.51406	10348	3489	0.134706	0.0244048	S	E14.5	16	16
AGAGTGGCAGTGACAG-1	E14.5	9431	2802	2.97954	9418	2801	-0.191354	-0.302533	G1	E14.5	5	5
AGAGTGGGTACTTCTT-1	E14.5	9139	2726	2.71364	9240	2726	-0.247715	-0.298506	G1	E14.5	0	0
AGAGTGGGTGAAATCA-1	E14.5	9544	2832	3.03856	9460	2832	-0.00392278	0.367249	G2M	E14.5	0	0
AGAGTGGGTTTGACAC-1	E14.5	6602	2162	3.18085	8624	2164	-0.142168	-0.276727	G1	E14.5	0	0
AGAGTGGTCAAACAAG-1	E14.5	18848	4208	3.0348	10438	3757	0.077325	-0.164939	S	E14.5	0	0
AGAGTGGTCCAGTAGT-1	E14.5	10436	2808	2.22307	9764	2808	-0.142067	-0.254016	G1	E14.5	6	6
AGAGTGGTCCGCAAGC-1	E14.5	6097	2198	4.19879	8584	2209	-0.120745	0.351762	G2M	E14.5	5	5
AGAGTGGTCCTTTCTC-1	E14.5	12298	2855	3.02488	10051	2843	0.107168	-0.214229	S	E14.5	8	8
AGAGTGGTCTCACATT-1	E14.5	6652	2275	2.82622	8597	2277	-0.115169	-0.234655	G1	E14.5	10	10
AGATCTGAGAAACCTA-1	E14.5	9734	2778	2.78406	9532	2777	-0.007923	-0.276645	G1	E14.5	4	4
AGATCTGAGCCCAGCT-1	E14.5	6947	2308	3.35397	8656	2309	-0.150111	-0.267298	G1	E14.5	0	0
AGATCTGAGGTCGGAT-1	E14.5	11754	2689	2.65442	9942	2682	-0.179404	-0.209922	G1	E14.5	14	14
AGATCTGAGTAGCCGA-1	E14.5	11884	2758	2.44026	9968	2755	-0.149975	0.110302	G2M	E14.5	13	13
AGATCTGAGTTTAGGA-1	E14.5	27867	5244	2.68418	9895	3039	0.0356246	0.0153648	S	E14.5	18	18
AGATCTGCAAATCCGT-1	E14.5	6854	2107	2.75751	8708	2110	0.0728786	0.0662325	S	E14.5	4	4
AGATCTGGTCCATGAT-1	E14.5	5873	2006	3.21812	8586	2027	0.0995949	0.375942	G2M	E14.5	0	0
AGATCTGTCAACACTG-1	E14.5	7698	2113	2.63705	8865	2113	-0.0628655	-0.22566	G1	E14.5	5	5
AGATCTGTCTTGTTTG-1	E14.5	5754	2130	2.53737	8483	2139	-0.066507	-0.128483	G1	E14.5	1	1
AGATTGCAGAGTGACC-1	E14.5	9121	2633	2.92731	9241	2633	-0.0554556	-0.216796	G1	E14.5	0	0
AGATTGCAGCCGGTAA-1	E14.5	6271	2127	2.99793	8635	2134	-0.168671	0.39926	G2M	E14.5	0	0
AGATTGCAGCGTCTAT-1	E14.5	11502	3095	2.73865	9990	3095	-0.00641285	-0.225705	G1	E14.5	3	3
AGATTGCAGTCACGCC-1	E14.5	6482	2173	4.30423	8649	2176	-0.0850636	-0.211162	G1	E14.5	4	4
AGATTGCAGTTCGCAT-1	E14.5	20374	3986	2.93511	10215	3233	0.0946093	0.263868	G2M	E14.5	0	0
AGATTGCCAGCCTTGG-1	E14.5	13740	3297	3.30422	10206	3276	0.0529159	-0.267021	S	E14.5	0	0
AGATTGCCAGTCTTCC-1	E14.5	9989	2959	2.73301	9662	2959	0.356877	-0.138204	S	E14.5	9	9
AGCAGCCAGAGCTGCA-1	E14.5	9412	2704	3.48491	9408	2703	-0.205254	-0.324017	G1	E14.5	1	1
AGCAGCCAGCTGGAAC-1	E14.5	10660	2845	2.81426	9828	2844	-0.0811704	0.326314	G2M	E14.5	1	1
AGCAGCCAGTAATCCC-1	E14.5	7110	2403	4.68354	8676	2403	-0.179184	-0.225794	G1	E14.5	11	11
AGCAGCCAGTATGACA-1	E14.5	6455	2036	3.28428	8650	2039	-0.101571	0.453867	G2M	E14.5	0	0
AGCAGCCAGTGACTCT-1	E14.5	8295	2641	2.66426	8910	2641	0.108543	0.511966	G2M	E14.5	0	0
AGCAGCCAGTGTACCT-1	E14.5	12405	3344	3.25675	10113	3343	-0.0411062	-0.230074	G1	E14.5	11	11
AGCAGCCCAACGATGG-1	E14.5	29387	4996	3.27015	9496	2581	0.0641716	0.125983	G2M	E14.5	2	2
AGCAGCCCAAGCTGAG-1	E14.5	9832	2946	2.61391	9584	2946	-0.189526	0.0744049	G2M	E14.5	0	0
AGCAGCCGTTGGGACA-1	E14.5	9538	3058	2.89369	9457	3057	0.08419	0.142335	G2M	E14.5	0	0
AGCAGCCTCATACGGT-1	E14.5	8621	2342	3.95546	9068	2342	0.171494	-0.0195488	S	E14.5	3	3
AGCAGCCTCCTTAATC-1	E14.5	6490	2004	3.02003	8647	2008	-0.0166499	-0.247507	G1	E14.5	6	6
AGCAGCCTCTACCTGC-1	E14.5	9302	2691	4.07439	9304	2690	0.304783	-0.0357905	S	E14.5	3	3
AGCATACAGAAACCAT-1	E14.5	8543	2516	2.71567	9020	2516	-0.112873	-0.22613	G1	E14.5	12	12
AGCATACAGAGCTGGT-1	E14.5	10943	2892	3.81066	9878	2888	0.16942	0.0261967	S	E14.5	8	8
AGCATACAGAGTTGGC-1	E14.5	18625	4316	2.91544	10505	3885	-0.072916	-0.212998	G1	E14.5	8	8
AGCATACAGTAACCCT-1	E14.5	10586	3156	2.77725	9868	3156	0.0250816	0.274737	G2M	E14.5	10	10
AGCATACCAAACAACA-1	E14.5	14653	3499	3.40545	10185	3415	0.0639615	-0.186764	S	E14.5	3	3
AGCATACCAATAGCGG-1	E14.5	10046	2762	3.33466	9650	2761	-0.137098	-0.293266	G1	E14.5	4	4
AGCATACCATCTCCCA-1	E14.5	8302	2672	2.83064	8915	2672	0.0980993	0.385562	G2M	E14.5	1	1
AGCATACCATGCATGT-1	E14.5	6541	2080	2.85889	8673	2082	-0.191665	-0.257267	G1	E14.5	3	3
AGCATACCATGCCACG-1	E14.5	23246	4880	2.1337	10180	3519	-0.107964	0.0653755	G2M	E14.5	3	3
AGCATACGTATCACCA-1	E14.5	6864	2187	3.14685	8670	2189	-0.0716747	-0.197945	G1	E14.5	1	1
AGCATACGTCGACTGC-1	E14.5	6817	2108	3.53528	8699	2108	-0.109206	-0.233844	G1	E14.5	4	4
AGCATACGTGGTTTCA-1	E14.5	7509	2459	3.72886	8749	2459	-0.111851	0.423716	G2M	E14.5	1	1
AGCATACGTTACCGAT-1	E14.5	11784	3050	2.89375	10031	3050	-0.182082	0.570983	G2M	E14.5	3	3
AGCATACTCCGTCAAA-1	E14.5	6291	2190	3.3381	8642	2196	-0.178698	-0.214095	G1	E14.5	0	0
AGCATACTCTTGTCAT-1	E14.5	29386	5571	2.63731	9573	3029	-0.0224429	-0.130182	G1	E14.5	4	4
AGCCTAAAGATCCCAT-1	E14.5	13544	3868	2.58417	10352	3860	0.179657	-0.019772	S	E14.5	1	1
AGCCTAAAGTCGCCGT-1	E14.5	6571	2042	3.54588	8690	2046	-0.0451971	-0.248904	G1	E14.5	0	0
AGCCTAAAGTCTTGCA-1	E14.5	21774	4934	2.61321	10455	3954	-0.182009	-0.021152	G1	E14.5	1	1
AGCCTAAAGTGGGCTA-1	E14.5	12582	3025	2.94866	10098	3021	0.126356	0.0187811	S	E14.5	2	2
AGCCTAACACAGCCCA-1	E14.5	5740	2080	3.08362	8500	2093	-0.0383751	-0.189117	G1	E14.5	9	9
AGCCTAACACGGCTAC-1	E14.5	9268	2654	2.90246	9290	2654	-0.12921	-0.221197	G1	E14.5	0	0
AGCCTAAGTCCAGTGC-1	E14.5	6096	2255	2.09974	8557	2269	0.0540496	0.420694	G2M	E14.5	0	0
AGCCTAAGTCCGAACC-1	E14.5	6257	2100	4.04347	8655	2105	-0.0695089	-0.290353	G1	E14.5	0	0
AGCCTAAGTCTGCAAT-1	E14.5	8527	2411	2.36895	9016	2410	-0.15606	0.797726	G2M	E14.5	6	6
AGCCTAAGTTGTACAC-1	E14.5	7340	2462	4.80926	8686	2462	0.0162778	-0.23295	S	E14.5	12	12
AGCCTAATCACTCCTG-1	E14.5	18752	4642	2.80503	10609	4243	-0.2961	-0.333911	G1	E14.5	9	9
AGCCTAATCGTAGGTT-1	E14.5	19680	4455	2.85061	10587	3911	-0.258682	-0.400546	G1	E14.5	11	11
AGCCTAATCTAACTGG-1	E14.5	8767	2893	2.80598	9057	2893	-0.0188825	0.0489211	G2M	E14.5	4	4
AGCGGTCAGCCGTCGT-1	E14.5	9422	2605	2.67459	9406	2603	-0.113856	-0.237483	G1	E14.5	14	14
AGCGGTCAGCCTTGAT-1	E14.5	6492	2187	1.81762	8642	2190	-0.08485	0.0373384	G2M	E14.5	6	6
AGCGGTCAGCTGAACG-1	E14.5	6260	2087	3.70607	8662	2094	-0.0935734	-0.282597	G1	E14.5	0	0
AGCGGTCAGGCTCAGA-1	E14.5	11068	3262	3.07192	9979	3262	0.0504239	-0.198814	S	E14.5	9	9
AGCGGTCAGGTCATCT-1	E14.5	5799	2019	3.6558	8546	2030	0.142	-0.100827	S	E14.5	6	6
AGCGGTCCATCTACGA-1	E14.5	6160	2118	2.90584	8619	2127	0.137177	-0.25262	S	E14.5	0	0
AGCGGTCCATGTAGTC-1	E14.5	7458	2302	3.87503	8758	2302	-0.0740243	0.148012	G2M	E14.5	3	3
AGCGGTCGTAATAGCA-1	E14.5	8893	2375	3.8907	9167	2375	-0.180579	-0.191266	G1	E14.5	7	7
AGCGGTCGTCCGTTAA-1	E14.5	11652	3125	3.19258	10036	3125	-0.121236	-0.322095	G1	E14.5	1	1
AGCGGTCTCACCTTAT-1	E14.5	12329	3750	3.94193	10221	3747	0.000106234	0.193069	G2M	E14.5	1	1
AGCGGTCTCTCCCTGA-1	E14.5	14092	3241	2.78882	10230	3167	-0.146007	0.361844	G2M	E14.5	8	8
AGCGGTCTCTCTGTCG-1	E14.5	10466	2963	3.08618	9778	2962	-0.141871	-0.214517	G1	E14.5	0	0
AGCGTATAGCATGGCA-1	E14.5	6705	2328	3.14691	8596	2331	-0.158456	-0.255724	G1	E14.5	1	1
AGCGTATAGTGGTAAT-1	E14.5	6824	2491	2.31536	8596	2493	-0.0860635	0.595582	G2M	E14.5	4	4
AGCGTATCACCACGTG-1	E14.5	7212	2324	4.95008	8688	2324	0.221128	-0.177087	S	E14.5	5	5
AGCGTATCAGCATACT-1	E14.5	6969	2256	3.9604	8668	2257	0.0284255	0.108819	G2M	E14.5	3	3
AGCGTATCATAGTAAG-1	E14.5	10905	3025	2.84273	9894	3025	-0.210651	-0.300317	G1	E14.5	4	4
AGCGTATCATATGCTG-1	E14.5	6991	2555	2.53183	8629	2555	0.147031	0.15553	G2M	E14.5	0	0
AGCGTATCATCACAAC-1	E14.5	8473	2878	3.09218	8938	2876	-0.0545851	0.349076	G2M	E14.5	1	1
AGCGTATCATCTGGTA-1	E14.5	16836	3792	2.0373	10363	3592	0.299095	-0.110503	S	E14.5	5	5
AGCGTATTCATCGGAT-1	E14.5	20237	4683	2.32742	10540	4010	-0.0678342	0.404892	G2M	E14.5	0	0
AGCGTATTCCTAGGGC-1	E14.5	11228	2684	2.90346	9887	2682	0.259681	-0.184315	S	E14.5	2	2
AGCGTATTCGCGTAGC-1	E14.5	14623	3833	3.50133	10275	3761	-0.0991874	-0.160995	G1	E14.5	1	1
AGCGTATTCTCGAGTA-1	E14.5	12083	2928	3.61665	10015	2925	0.00807553	0.241858	G2M	E14.5	2	2
AGCGTCGAGTGTCCCG-1	E14.5	7706	2524	3.15339	8781	2524	-0.11154	-0.220586	G1	E14.5	1	1
AGCGTCGCAATTCCTT-1	E14.5	7057	2686	2.97577	8594	2688	-0.219945	-0.273629	G1	E14.5	1	1
AGCGTCGCACATAACC-1	E14.5	7711	2173	2.64557	8832	2174	0.159491	-0.0762759	S	E14.5	3	3
AGCGTCGCATTGGCGC-1	E14.5	6337	2247	2.20925	8604	2253	-0.123139	-0.253414	G1	E14.5	1	1
AGCGTCGTCTTTACAC-1	E14.5	13830	3063	2.79103	10162	3007	0.137776	-0.11626	S	E14.5	16	16
AGCTCCTCAATCACAC-1	E14.5	7008	2302	3.52454	8672	2302	-0.0173641	-0.0403123	G1	E14.5	1	1
AGCTCCTCAATGTTGC-1	E14.5	6642	2103	4.47154	8648	2106	-0.0572324	0.016598	G2M	E14.5	3	3
AGCTCCTCACCTCGTT-1	E14.5	28048	4941	2.64546	9457	2613	-0.050742	0.416599	G2M	E14.5	2	2
AGCTCCTCACTATCTT-1	E14.5	17611	3994	2.58361	10380	3674	0.0871678	-0.128199	S	E14.5	0	0
AGCTCCTCAGGTCCAC-1	E14.5	10024	2756	2.50399	9643	2756	0.0734264	0.153923	G2M	E14.5	5	5
AGCTCCTCATACGCTA-1	E14.5	9371	2838	2.63579	9369	2836	0.128216	-0.0258174	S	E14.5	1	1
AGCTCCTGTATAAACG-1	E14.5	8732	2556	2.82868	9089	2556	-0.143745	-0.276071	G1	E14.5	4	4
AGCTCCTGTCACACGC-1	E14.5	5723	2086	3.98392	8491	2105	-0.0299208	0.488453	G2M	E14.5	0	0
AGCTCCTGTGAGTATA-1	E14.5	7206	2213	3.51096	8724	2210	-0.0579889	0.253311	G2M	E14.5	12	12
AGCTCCTGTTAAGACA-1	E14.5	23460	4604	2.53197	10007	3142	0.0429267	-0.179508	S	E14.5	2	2
AGCTCCTGTTCGCGAC-1	E14.5	9764	2787	2.98034	9551	2786	-0.128284	-0.269394	G1	E14.5	0	0
AGCTCCTTCTCTGTCG-1	E14.5	13697	3605	2.92765	10259	3578	-0.171212	-0.322334	G1	E14.5	3	3
AGCTCCTTCTCTTATG-1	E14.5	11424	3244	2.71359	10033	3243	-0.0525654	0.442569	G2M	E14.5	1	1
AGCTCCTTCTGCCCTA-1	E14.5	9556	2340	3.34868	9451	2339	-0.124106	-0.238368	G1	E14.5	2	2
AGCTCCTTCTTACCTA-1	E14.5	7216	2367	1.73226	8666	2366	-0.190917	-0.20944	G1	E14.5	2	2
AGCTCTCAGCAAATCA-1	E14.5	8305	2211	3.08248	8999	2211	0.0502198	0.049267	S	E14.5	5	5
AGCTCTCAGCTGAACG-1	E14.5	7002	2159	3.31334	8705	2160	-0.0189496	-0.14861	G1	E14.5	3	3
AGCTCTCAGGATATAC-1	E14.5	8414	2740	2.5315	8951	2740	-0.130981	-0.252776	G1	E14.5	1	1
AGCTCTCAGTTAGCGG-1	E14.5	19503	4422	3.48664	10459	3872	-0.051734	-0.0579272	G1	E14.5	1	1
AGCTCTCCACGAAATA-1	E14.5	8127	2288	3.85136	8920	2288	-0.0958107	-0.165454	G1	E14.5	5	5
AGCTCTCCAGGTTTCA-1	E14.5	5519	2118	2.17431	8460	2137	-0.13755	-0.224809	G1	E14.5	0	0
AGCTCTCCAGTATAAG-1	E14.5	7292	2343	2.64674	8717	2343	-0.0563327	-0.310199	G1	E14.5	9	9
AGCTCTCCAGTGAGTG-1	E14.5	10347	2876	2.73509	9760	2876	-0.121698	0.445442	G2M	E14.5	3	3
AGCTCTCCATATGGTC-1	E14.5	8420	2644	3.59857	8945	2644	-0.102989	0.361111	G2M	E14.5	5	5
AGCTCTCGTCCGTCAG-1	E14.5	8237	2419	3.33859	8953	2419	0.246721	-0.116541	S	E14.5	0	0
AGCTCTCGTGATAAGT-1	E14.5	5358	2091	3.02352	8413	2109	-0.11295	-0.235336	G1	E14.5	1	1
AGCTCTCGTTCGGCAC-1	E14.5	9859	2763	3.09362	9595	2763	-0.014308	0.0370621	G2M	E14.5	10	10
AGCTCTCTCTCGAGTA-1	E14.5	15208	3850	2.48553	10227	3754	0.240764	-0.107572	S	E14.5	1	1
AGCTTGAAGCTTTGGT-1	E14.5	9456	2906	3.20431	9428	2905	-0.178	-0.218825	G1	E14.5	10	10
AGCTTGAAGGGCTCTC-1	E14.5	6695	2233	2.76326	8627	2232	-0.00390935	-0.131331	G1	E14.5	4	4
AGCTTGAAGTAGTGCG-1	E14.5	10486	2056	2.35552	9668	2056	0.0869798	0.0961893	G2M	E14.5	13	13
AGCTTGAAGTCAAGCG-1	E14.5	8079	2261	3.28011	8911	2260	0.0838362	-0.222868	S	E14.5	15	15
AGCTTGAAGTGTCTCA-1	E14.5	11129	3508	3.86378	10041	3508	-0.0669919	0.25121	G2M	E14.5	1	1
AGCTTGACAGTCTTCC-1	E14.5	14528	3671	3.32461	10210	3613	-0.0358294	-0.204972	G1	E14.5	4	4
AGCTTGACAGTTAACC-1	E14.5	16580	4074	2.31604	10324	3883	-0.185177	-0.0142743	G1	E14.5	0	0
AGGCCACAGACTAAGT-1	E14.5	15984	3917	3.09059	10275	3779	-0.00487002	-0.100763	G1	E14.5	0	0
AGGCCACAGGCTAGAC-1	E14.5	8015	2793	2.68247	8783	2793	-0.0844419	-0.365401	G1	E14.5	9	9
AGGCCACGTCATCGGC-1	E14.5	9050	2619	3.07182	9204	2619	-0.15349	-0.248604	G1	E14.5	3	3
AGGCCACTCCTGCCAT-1	E14.5	10206	3135	2.91985	9738	3132	-0.162142	0.501327	G2M	E14.5	10	10
AGGCCACTCGCCAGCA-1	E14.5	21101	4521	2.55912	10400	3724	0.175216	0.327572	G2M	E14.5	6	6
AGGCCACTCGCTTAGA-1	E14.5	5449	2033	3.22995	8450	2057	-0.142486	-0.280703	G1	E14.5	1	1
AGGCCACTCTCTTATG-1	E14.5	10502	2968	2.19958	9793	2968	-0.0812639	0.481108	G2M	E14.5	5	5
AGGCCACTCTGTACGA-1	E14.5	7372	2384	3.26913	8715	2383	-0.108281	-0.218532	G1	E14.5	5	5
AGGCCACTCTTGCCGT-1	E14.5	11126	2762	2.66942	9900	2760	-0.137483	0.0792172	G2M	E14.5	3	3
AGGCCGTAGGCGCTCT-1	E14.5	10664	3221	3.19767	9879	3221	-0.223708	-0.324687	G1	E14.5	1	1
AGGCCGTAGTGCGATG-1	E14.5	7203	2197	2.8738	8753	2196	0.0979779	-0.217731	S	E14.5	9	9
AGGCCGTAGTTGTCGT-1	E14.5	6415	2421	3.19564	8561	2423	0.205519	-0.227037	S	E14.5	4	4
AGGCCGTCAGTACACT-1	E14.5	14886	3555	2.36464	10197	3484	0.004167	-0.0129027	S	E14.5	5	5
AGGCCGTGTCGCGAAA-1	E14.5	10709	2954	2.8294	9862	2954	-0.150255	-0.205388	G1	E14.5	4	4
AGGCCGTTCACGACTA-1	E14.5	5774	2109	2.78836	8515	2129	-0.127066	-0.194466	G1	E14.5	1	1
AGGCCGTTCGAATCCA-1	E14.5	5625	2046	3.59111	8463	2065	-0.14254	-0.185289	G1	E14.5	9	9
AGGCCGTTCTAACTCT-1	E14.5	13164	3733	3.61592	10250	3716	-0.111	-0.318138	G1	E14.5	0	0
AGGCCGTTCTGGCGAC-1	E14.5	8400	2598	2.25	8955	2598	-0.14342	-0.284228	G1	E14.5	0	0
AGGGAGTAGAGGACGG-1	E14.5	7718	2608	2.53952	8772	2608	-0.159474	-0.224052	G1	E14.5	1	1
AGGGAGTAGTACGTTC-1	E14.5	5967	2049	2.849	8587	2058	-0.12913	-0.276988	G1	E14.5	1	1
AGGGAGTAGTAGCCGA-1	E14.5	9077	2655	3.86692	9212	2655	-0.108888	-0.189931	G1	E14.5	3	3
AGGGAGTAGTGATCGG-1	E14.5	6080	2143	2.77961	8579	2152	0.0911649	-0.2449	S	E14.5	6	6
AGGGAGTCATGCAATC-1	E14.5	6721	2150	3.68993	8640	2149	0.128957	-0.0560213	S	E14.5	3	3
AGGGAGTGTAATTGGA-1	E14.5	7080	2355	3.27684	8670	2357	-0.17748	-0.263929	G1	E14.5	4	4
AGGGAGTGTAGGCTGA-1	E14.5	15799	3232	4.62055	10246	3059	-0.213822	-0.345715	G1	E14.5	14	14
AGGGAGTGTCGCTTCT-1	E14.5	10425	3201	2.61871	9834	3201	-0.102901	0.652159	G2M	E14.5	0	0
AGGGAGTGTTGTTTGG-1	E14.5	8810	2528	2.93984	9108	2526	-0.180787	-0.0968955	G1	E14.5	5	5
AGGGAGTTCGCTAGCG-1	E14.5	10930	2446	3.37603	9816	2446	-0.124347	-0.0830732	G1	E14.5	2	2
AGGGAGTTCGGTGTCG-1	E14.5	7447	2559	3.15563	8702	2558	-0.117892	0.137559	G2M	E14.5	1	1
AGGGAGTTCTTATCTG-1	E14.5	7543	2492	2.92987	8736	2492	-0.227547	-0.276589	G1	E14.5	4	4
AGGGATGAGCACGCCT-1	E14.5	10074	2823	3.37502	9654	2821	0.0145206	0.276122	G2M	E14.5	0	0
AGGGATGAGCCCAATT-1	E14.5	12509	3208	2.54217	10122	3205	-0.15083	0.562957	G2M	E14.5	5	5
AGGGATGAGGGCACTA-1	E14.5	14214	3770	2.65231	10276	3739	0.0980956	-0.0059338	S	E14.5	4	4
AGGGATGCATATACGC-1	E14.5	7436	2265	3.17375	8756	2265	-0.110582	-0.159337	G1	E14.5	1	1
AGGGATGCATCTCGCT-1	E14.5	14996	3410	2.90744	10148	3298	-0.226231	-0.0251475	G1	E14.5	12	12
AGGGATGGTACAGTTC-1	E14.5	12958	3192	2.84766	10127	3182	0.0109434	-0.139645	S	E14.5	3	3
AGGGATGGTAGCACGA-1	E14.5	11097	3006	3.65865	9921	3006	-0.139226	-0.146277	G1	E14.5	3	3
AGGGATGGTAGCTCCG-1	E14.5	12355	3184	3.0514	10081	3182	0.0937879	-0.0818133	S	E14.5	0	0
AGGGATGGTTCGGCAC-1	E14.5	13842	3027	2.27568	10143	2983	0.0283701	-0.101868	S	E14.5	2	2
AGGGATGTCCGAATGT-1	E14.5	10911	3184	3.4369	9936	3184	-0.0347615	0.326584	G2M	E14.5	1	1
AGGGATGTCCTCTAGC-1	E14.5	6662	2113	3.16722	8660	2115	0.0581128	-0.215947	S	E14.5	1	1
AGGGATGTCTTGTACT-1	E14.5	14291	3655	2.9669	10284	3600	0.106775	-0.212942	S	E14.5	1	1
AGGGTGAAGGCGTACA-1	E14.5	8827	2492	3.61391	9119	2492	-0.18336	-0.233956	G1	E14.5	11	11
AGGGTGAAGGGAACGG-1	E14.5	10368	2983	4.16667	9774	2982	-0.210713	-0.18468	G1	E14.5	1	1
AGGGTGACAAGAGTCG-1	E14.5	8802	2652	2.6244	9097	2652	-0.161872	-0.282354	G1	E14.5	0	0
AGGGTGACAAGTAATG-1	E14.5	19717	4414	3.01263	10436	3826	0.34505	-0.167052	S	E14.5	2	2
AGGGTGACACCAGCAC-1	E14.5	7079	2420	2.40147	8683	2420	0.227634	-0.151611	S	E14.5	6	6
AGGGTGACAGATCTGT-1	E14.5	6192	2157	3.74677	8627	2169	-0.137617	-0.0160646	G1	E14.5	0	0
AGGGTGACAGTAAGCG-1	E14.5	13908	3477	2.81852	10280	3449	-0.135269	-0.250494	G1	E14.5	0	0
AGGGTGAGTAGGCATG-1	E14.5	16299	4164	3.12289	10392	4033	0.110682	0.1962	G2M	E14.5	1	1
AGGGTGAGTCGATTGT-1	E14.5	11863	3007	2.9082	10023	3007	0.0411951	-0.301887	S	E14.5	2	2
AGGGTGAGTCTCGTTC-1	E14.5	7719	2539	2.34486	8783	2539	-0.189306	-0.305717	G1	E14.5	1	1
AGGGTGAGTTAAAGTG-1	E14.5	6485	2334	3.34618	8576	2334	-0.0714618	-0.0487814	G1	E14.5	4	4
AGGGTGATCAGGTTCA-1	E14.5	16537	3342	3.97291	10206	3108	0.0259285	0.236991	G2M	E14.5	14	14
AGGGTGATCTATCCCG-1	E14.5	17079	3655	2.44159	10316	3394	0.00919581	0.0708417	G2M	E14.5	16	16
AGGGTGATCTCGATGA-1	E14.5	14153	3302	3.27139	10177	3245	-0.0675197	0.219862	G2M	E14.5	2	2
AGGTCATAGATATGGT-1	E14.5	7908	2483	3.27516	8836	2483	-0.196925	-0.0946952	G1	E14.5	4	4
AGGTCATAGGAATCGC-1	E14.5	13051	3550	2.7201	10233	3547	-0.138872	-0.257571	G1	E14.5	1	1
AGGTCATAGGACCACA-1	E14.5	5871	2151	3.15108	8539	2159	-0.076533	-0.199631	G1	E14.5	1	1
AGGTCATCACAGAGGT-1	E14.5	9287	2384	3.02573	9296	2384	-0.100521	-0.11189	G1	E14.5	8	8
AGGTCATCACATTCGA-1	E14.5	9208	2321	3.4861	9288	2321	0.239771	-0.0700848	S	E14.5	2	2
AGGTCATCAGCGTCCA-1	E14.5	21548	4748	3.26712	10354	3778	0.0646693	-0.262862	S	E14.5	3	3
AGGTCATGTGCGCTTG-1	E14.5	5998	2041	3.3011	8599	2046	0.237964	-0.217313	S	E14.5	0	0
AGGTCATGTGGTAACG-1	E14.5	7966	2124	2.76174	8913	2123	0.0956397	-0.0699151	S	E14.5	0	0
AGGTCATTCAACGCTA-1	E14.5	16625	3915	3.55489	10321	3701	-0.112214	-0.307871	G1	E14.5	3	3
AGGTCATTCGGTCCGA-1	E14.5	23826	4891	3.20238	10278	3503	-0.125655	-0.248947	G1	E14.5	5	5
AGGTCCGCAAAGTGCG-1	E14.5	24665	4972	3.10967	10038	3321	0.109802	-0.00581624	S	E14.5	1	1
AGGTCCGCAGATGAGC-1	E14.5	24051	5216	3.19737	10213	3646	-0.108572	0.488664	G2M	E14.5	1	1
AGGTCCGGTAGGGTAC-1	E14.5	25238	5281	2.83303	9944	3426	-0.0224065	-0.193873	G1	E14.5	0	0
AGGTCCGGTGAGGGAG-1	E14.5	25627	5348	3.02806	9945	3401	0.0844065	-0.315628	S	E14.5	8	8
AGGTCCGGTGGACGAT-1	E14.5	20512	4675	2.93487	10454	3918	0.0353669	0.368727	G2M	E14.5	0	0
AGGTCCGGTTCAGACT-1	E14.5	8474	2432	2.54897	9004	2428	-0.026845	-0.148742	G1	E14.5	3	3
AGGTCCGTCATGCATG-1	E14.5	13590	3507	3.23032	10243	3487	-0.163536	-0.174427	G1	E14.5	0	0
AGGTCCGTCTCGCTTG-1	E14.5	10653	3071	3.69849	9843	3070	0.189285	0.158512	S	E14.5	1	1
AGGTCCGTCTTGTATC-1	E14.5	8871	2316	2.22072	9136	2315	-0.112299	0.332737	G2M	E14.5	8	8
AGTAGTCAGGCTCAGA-1	E14.5	8254	2412	2.68961	8943	2411	0.186113	-0.15407	S	E14.5	3	3
AGTAGTCGTACGCACC-1	E14.5	6046	2033	2.8614	8616	2042	-0.0873142	-0.284521	G1	E14.5	0	0
AGTAGTCGTCAGAAGC-1	E14.5	7453	2435	3.68979	8733	2435	-0.109179	-0.228979	G1	E14.5	3	3
AGTAGTCGTCATGCAT-1	E14.5	12135	3269	3.78245	10117	3265	0.119428	-0.0827194	S	E14.5	3	3
AGTAGTCGTTAAGACA-1	E14.5	7651	2510	3.31983	8769	2510	0.152539	0.074654	S	E14.5	1	1
AGTAGTCGTTCCCTTG-1	E14.5	11704	3374	3.11005	10079	3374	-0.042359	0.29003	G2M	E14.5	10	10
AGTAGTCTCCCGGATG-1	E14.5	6840	2322	4.03509	8626	2320	0.217486	-0.1816	S	E14.5	0	0
AGTAGTCTCGCAAGCC-1	E14.5	15412	3727	3.12743	10178	3599	0.0858249	-0.254046	S	E14.5	3	3
AGTAGTCTCTACTCAT-1	E14.5	5646	2271	2.85158	8413	2291	-0.16518	0.709899	G2M	E14.5	4	4
AGTCTTTAGTGCAAGC-1	E14.5	8904	2620	2.52695	9140	2620	0.0719808	0.191869	G2M	E14.5	0	0
AGTCTTTCAAGCGTAG-1	E14.5	22711	4698	2.3689	10226	3511	-0.169543	-0.0256772	G1	E14.5	0	0
AGTCTTTCAAGGACAC-1	E14.5	6855	2129	2.21736	8698	2129	0.319168	0.156318	S	E14.5	0	0
AGTCTTTCATTCCTCG-1	E14.5	17259	3905	2.52622	10363	3659	-0.109685	0.0212526	G2M	E14.5	3	3
AGTCTTTGTCAGTGGA-1	E14.5	14828	3740	2.7583	10233	3672	-0.171478	-0.273836	G1	E14.5	0	0
AGTCTTTGTCTCATCC-1	E14.5	11678	3194	2.79157	10035	3194	-0.173714	0.343192	G2M	E14.5	12	12
AGTCTTTGTGAGTGAC-1	E14.5	7948	2228	3.08254	8867	2227	-0.107776	-0.229929	G1	E14.5	8	8
AGTCTTTGTGATGATA-1	E14.5	14670	3404	2.74029	10163	3341	-0.15577	-0.0416317	G1	E14.5	7	7
AGTCTTTGTTACGCGC-1	E14.5	9003	2900	4.03199	9167	2900	-0.193305	-0.216503	G1	E14.5	5	5
AGTCTTTGTTCAGCGC-1	E14.5	7748	2466	2.14249	8767	2465	-0.119465	-0.317783	G1	E14.5	1	1
AGTCTTTGTTGGACCC-1	E14.5	9208	2237	2.63901	9293	2237	0.097056	-0.071236	S	E14.5	2	2
AGTCTTTTCCGCAGTG-1	E14.5	8956	2739	2.65744	9151	2739	-0.212472	-0.334033	G1	E14.5	1	1
AGTCTTTTCGAGCCCA-1	E14.5	8234	2590	2.87831	8910	2590	-0.198844	-0.326777	G1	E14.5	0	0
AGTCTTTTCGTCACGG-1	E14.5	11773	2820	3.1173	9997	2818	-0.0907099	0.0825509	G2M	E14.5	2	2
AGTCTTTTCTCTAGGA-1	E14.5	9660	2919	2.30849	9517	2917	-0.18554	-0.366017	G1	E14.5	4	4
AGTGAGGAGTACGTAA-1	E14.5	6960	2126	3.08908	8736	2126	-0.0591446	0.039288	G2M	E14.5	3	3
AGTGAGGGTAACGACG-1	E14.5	6591	2006	3.9296	8671	2007	-0.105846	-0.102903	G1	E14.5	14	14
AGTGAGGGTCCCTTGT-1	E14.5	13171	3700	4.1151	10252	3690	0.00139828	-0.221119	S	E14.5	1	1
AGTGAGGGTGAGGGTT-1	E14.5	9480	2709	2.83755	9425	2709	-0.170059	-0.204456	G1	E14.5	5	5
AGTGAGGGTTGGACCC-1	E14.5	8960	2520	2.62277	9172	2520	-0.0418938	-0.303103	G1	E14.5	1	1
AGTGAGGTCCTCGCAT-1	E14.5	9595	2582	2.48046	9478	2582	-0.102056	0.300229	G2M	E14.5	1	1
AGTGAGGTCCTCTAGC-1	E14.5	7882	2686	2.41056	8782	2686	-0.0566392	0.655014	G2M	E14.5	0	0
AGTGAGGTCGTCCAGG-1	E14.5	16799	3796	2.57753	10306	3576	-0.0859639	-0.288228	G1	E14.5	3	3
AGTGAGGTCTCTGAGA-1	E14.5	16198	3931	3.34609	10278	3740	-0.0109047	-0.00795844	G1	E14.5	5	5
AGTGGGACAATGACCT-1	E14.5	9738	2675	2.92668	9540	2674	0.0439672	-0.15887	S	E14.5	3	3
AGTGGGACACTTCGAA-1	E14.5	9352	2588	2.36313	9352	2588	-0.127741	0.0801375	G2M	E14.5	1	1
AGTGGGAGTGGGTCAA-1	E14.5	14177	3386	3.46336	10225	3338	0.017742	0.385696	G2M	E14.5	3	3
AGTGGGAGTTACAGAA-1	E14.5	8083	2251	2.42484	8888	2251	-0.187762	-0.272274	G1	E14.5	12	12
AGTGGGATCACTCTTA-1	E14.5	7943	2668	2.99635	8805	2668	0.167935	-0.140085	S	E14.5	0	0
AGTGGGATCAGGTAAA-1	E14.5	11850	3214	2.94515	10066	3213	-0.123274	-0.00400829	G1	E14.5	17	17
AGTGGGATCGCGCCAA-1	E14.5	22307	4649	2.52387	10211	3505	-0.0362082	-0.245118	G1	E14.5	1	1
AGTGTCAAGGCAGGTT-1	E14.5	6737	2385	3.45851	8600	2384	0.0428811	-0.155067	S	E14.5	5	5
AGTGTCACACCAGATT-1	E14.5	5848	2282	3.19767	8471	2288	0.222647	-0.201867	S	E14.5	1	1
AGTGTCACAGGACCCT-1	E14.5	15715	4048	2.90169	10288	3928	0.113286	0.260673	G2M	E14.5	0	0
AGTGTCACATCATCCC-1	E14.5	8525	2377	3.29619	9045	2377	-0.0843819	-0.150287	G1	E14.5	0	0
AGTGTCAGTAATCACC-1	E14.5	15693	3899	2.69547	10285	3781	-0.174946	-0.37898	G1	E14.5	4	4
AGTGTCAGTGCTAGCC-1	E14.5	5849	2164	3.40229	8510	2173	-0.027522	-0.236536	G1	E14.5	0	0
AGTGTCAGTTCACCTC-1	E14.5	12921	3428	2.86356	10156	3419	-0.106452	-0.312574	G1	E14.5	1	1
AGTGTCAGTTGATTCG-1	E14.5	11339	3122	2.91913	9985	3122	0.0475856	-0.208822	S	E14.5	4	4
AGTGTCATCACAGTAC-1	E14.5	12215	3119	2.03848	10077	3115	0.148569	-0.054992	S	E14.5	0	0
AGTGTCATCACCAGGC-1	E14.5	9180	2395	3.28976	9271	2395	-0.142831	-0.0782114	G1	E14.5	2	2
AGTGTCATCCTAAGTG-1	E14.5	12815	3439	2.73898	10184	3435	-0.214144	-0.315193	G1	E14.5	1	1
AGTGTCATCCTGCAGG-1	E14.5	16489	3553	2.55322	10246	3350	0.113178	-0.0699654	S	E14.5	2	2
AGTGTCATCTCATTCA-1	E14.5	9171	2695	3.16214	9261	2695	-0.170692	-0.257911	G1	E14.5	4	4
AGTTGGTAGATCTGCT-1	E14.5	26130	5557	2.09338	9867	3453	-0.0403327	0.0286747	G2M	E14.5	0	0
AGTTGGTAGTACCGGA-1	E14.5	15718	3765	2.4367	10209	3620	-0.0631656	0.206055	G2M	E14.5	6	6
AGTTGGTAGTTAGCGG-1	E14.5	26306	5492	3.00312	9787	3324	0.0116236	-0.125658	S	E14.5	1	1
AGTTGGTCAAGCGTAG-1	E14.5	8811	2509	2.68982	9113	2509	-0.0655046	-0.262558	G1	E14.5	1	1
AGTTGGTCAAGTCTAC-1	E14.5	9475	2645	2.7124	9420	2645	0.0637132	-0.15341	S	E14.5	2	2
AGTTGGTGTATTCTCT-1	E14.5	12928	3186	3.38026	10136	3175	-0.0572332	0.257356	G2M	E14.5	4	4
AGTTGGTGTCTGCCAG-1	E14.5	7434	2331	2.7307	8749	2330	0.339441	0.114079	S	E14.5	0	0
AGTTGGTGTGCAGACA-1	E14.5	11909	3266	3.56873	10079	3264	-0.141003	-0.316897	G1	E14.5	0	0
AGTTGGTGTTCCACAA-1	E14.5	25029	5240	2.90463	9976	3449	-0.133461	-0.0512476	G1	E14.5	0	0
ATAACGCAGTTAACGA-1	E14.5	7018	2263	4.10373	8661	2265	-0.0251978	0.290733	G2M	E14.5	5	5
ATAACGCCATGCCTAA-1	E14.5	11816	3208	2.82668	10039	3207	-0.113196	0.238553	G2M	E14.5	6	6
ATAACGCGTATAGTAG-1	E14.5	9755	2843	3.37263	9548	2843	-0.255094	-0.254568	G1	E14.5	1	1
ATAACGCGTCAACTGT-1	E14.5	31318	5650	2.8482	9510	2888	-0.20826	0.248102	G2M	E14.5	8	8
ATAACGCGTCGCATCG-1	E14.5	10898	3139	2.55093	9923	3138	-0.0558007	0.417213	G2M	E14.5	1	1
ATAACGCTCCGATATG-1	E14.5	9887	2427	2.46789	9564	2427	-0.0758135	0.295076	G2M	E14.5	2	2
ATAACGCTCTGCTTGC-1	E14.5	7620	2516	3.54331	8766	2515	-0.172712	-0.246791	G1	E14.5	0	0
ATAACGCTCTTACCGC-1	E14.5	13520	3469	2.81805	10247	3450	-0.0674968	0.28759	G2M	E14.5	3	3
ATAAGAGAGGCATTGG-1	E14.5	22388	4870	2.71127	10355	3752	-0.166474	0.230197	G2M	E14.5	0	0
ATAAGAGAGGGATGGG-1	E14.5	8093	2537	3.45978	8869	2537	-0.151343	-0.27024	G1	E14.5	0	0
ATAAGAGCAAGTCATC-1	E14.5	5995	2265	2.81902	8518	2272	0.0641408	-0.178832	S	E14.5	1	1
ATAAGAGGTTAAAGAC-1	E14.5	9810	3023	3.2314	9586	3022	-0.149211	-0.312685	G1	E14.5	1	1
ATAAGAGTCACAGGCC-1	E14.5	17435	3787	2.44336	10346	3478	-0.0804502	0.276089	G2M	E14.5	7	7
ATAAGAGTCACTTCAT-1	E14.5	26713	5645	2.9087	9800	3427	-0.0465743	-0.24744	G1	E14.5	3	3
ATAAGAGTCTAGCACA-1	E14.5	6064	2190	2.47361	8557	2200	-0.0337382	0.551734	G2M	E14.5	0	0
ATAGACCAGAGGACGG-1	E14.5	23168	4233	2.7279	10092	2921	-0.197134	-0.28079	G1	E14.5	12	12
ATAGACCAGATCTGCT-1	E14.5	6262	2170	3.46535	8623	2174	0.0301774	-0.258239	S	E14.5	1	1
ATAGACCAGCAGGCTA-1	E14.5	15674	3621	2.21386	10240	3504	0.249827	-0.128298	S	E14.5	2	2
ATAGACCCACAAGCCC-1	E14.5	15205	3454	2.80171	10159	3340	-0.12378	-0.226428	G1	E14.5	5	5
ATAGACCCACCGCTAG-1	E14.5	9067	2856	2.93372	9199	2856	0.252672	-0.135598	S	E14.5	0	0
ATAGACCCACGAAAGC-1	E14.5	10029	2675	2.36315	9636	2673	0.31549	-0.0299192	S	E14.5	1	1
ATAGACCCACGGTTTA-1	E14.5	11213	3045	3.21056	9937	3045	-0.047152	-0.235665	G1	E14.5	0	0
ATAGACCCACTACAGT-1	E14.5	6075	2007	4.79012	8597	2020	0.0175304	-0.169557	S	E14.5	16	16
ATAGACCCACTTCTGC-1	E14.5	12045	3574	3.08842	10167	3569	-0.0964168	-0.328977	G1	E14.5	0	0
ATAGACCCAGGCAGTA-1	E14.5	10815	2540	3.06056	9812	2540	-0.174434	-0.289575	G1	E14.5	2	2
ATAGACCCATCCCATC-1	E14.5	7085	2403	2.70995	8689	2403	-0.108656	-0.145962	G1	E14.5	1	1
ATAGACCGTGTGTGCC-1	E14.5	25973	5243	2.77981	9794	3217	-0.180653	-0.0537185	G1	E14.5	0	0
ATAGACCGTTCGTTGA-1	E14.5	23548	4660	2.87498	10055	3219	-0.0398024	-0.304126	G1	E14.5	4	4
ATAGACCTCTGGTATG-1	E14.5	22673	5180	2.47872	10394	3964	0.237067	-0.0056663	S	E14.5	0	0
ATAGACCTCTGGTGTA-1	E14.5	8568	2442	2.2409	9029	2440	-0.00297976	-0.217111	G1	E14.5	3	3
ATAGACCTCTTGCAAG-1	E14.5	17670	3751	2.96548	10393	3476	0.302099	-0.173074	S	E14.5	7	7
ATCACGAAGACTCGGA-1	E14.5	7414	2430	2.9269	8710	2430	0.0964948	0.17426	G2M	E14.5	17	17
ATCACGAAGCACGCCT-1	E14.5	6685	2164	3.75467	8637	2166	-0.138663	-0.217104	G1	E14.5	1	1
ATCACGAAGCTAACAA-1	E14.5	10263	3032	2.98158	9737	3031	-0.273915	-0.301723	G1	E14.5	3	3
ATCACGAAGCTATGCT-1	E14.5	7121	2367	2.96307	8658	2367	-0.110511	0.595411	G2M	E14.5	3	3
ATCACGAAGCTCCTCT-1	E14.5	6756	2247	3.65601	8639	2248	0.081891	-0.178288	S	E14.5	0	0
ATCACGAGTCTGGAGA-1	E14.5	29024	5013	3.12155	9554	2662	-0.0316807	0.145667	G2M	E14.5	7	7
ATCACGAGTGATGCCC-1	E14.5	8020	2310	2.39401	8879	2309	0.186795	0.269602	G2M	E14.5	0	0
ATCACGATCCAGAGGA-1	E14.5	6989	2090	3.56274	8720	2089	0.0266591	-0.18448	S	E14.5	3	3
ATCACGATCGGATGGA-1	E14.5	8194	2442	3.41713	8908	2442	-0.132337	-0.239327	G1	E14.5	5	5
ATCATCTAGTCCAGGA-1	E14.5	8133	2444	3.22144	8897	2443	-0.116514	-0.257102	G1	E14.5	4	4
ATCATCTCACCTATCC-1	E14.5	11698	2786	3.00051	9962	2785	0.036501	-0.0844998	S	E14.5	2	2
ATCATCTCATCTGGTA-1	E14.5	10579	2576	2.6373	9787	2576	-0.229393	-0.220747	G1	E14.5	12	12
ATCATCTCATGATCCA-1	E14.5	6246	2267	2.01729	8600	2273	-0.163265	0.565673	G2M	E14.5	4	4
ATCATCTGTACTCAAC-1	E14.5	9710	3013	3.41916	9549	3013	0.203084	-0.110196	S	E14.5	14	14
ATCATCTGTAGAGGAA-1	E14.5	7385	2414	3.15504	8729	2414	-0.100698	-0.289872	G1	E14.5	4	4
ATCATCTTCACTTACT-1	E14.5	6191	2303	2.60055	8583	2315	0.217889	0.183859	S	E14.5	4	4
ATCATCTTCATGCATG-1	E14.5	23615	4964	2.52805	10155	3535	0.27389	-0.0855545	S	E14.5	0	0
ATCATCTTCGAACGGA-1	E14.5	8742	2612	3.08854	9074	2612	-0.158893	-0.316867	G1	E14.5	1	1
ATCATCTTCTGCGTAA-1	E14.5	6730	2352	2.86776	8595	2352	-0.13355	-0.238777	G1	E14.5	0	0
ATCATGGAGAGGTTGC-1	E14.5	7413	2462	2.73843	8716	2462	0.125543	0.0097724	S	E14.5	0	0
ATCATGGAGCCGGTAA-1	E14.5	11344	2722	3.55254	9912	2721	-0.0106008	0.407355	G2M	E14.5	2	2
ATCATGGAGGCCCTCA-1	E14.5	11642	3231	2.83456	10049	3231	-0.215511	-0.138294	G1	E14.5	0	0
ATCATGGCACAAGCCC-1	E14.5	6416	2273	4.27057	8586	2273	0.180068	-0.0675489	S	E14.5	1	1
ATCATGGCAGCCTTGG-1	E14.5	5836	2232	2.57025	8471	2245	-0.132772	-0.28964	G1	E14.5	1	1
ATCATGGCATCCGTGG-1	E14.5	6769	2353	3.1467	8628	2354	-0.127182	-0.228174	G1	E14.5	0	0
ATCATGGGTCATGCCG-1	E14.5	16463	3708	2.60584	10258	3480	-0.239629	-0.310703	G1	E14.5	2	2
ATCATGGGTGCTGTAT-1	E14.5	9722	2961	3.06521	9558	2960	-0.0706878	0.333324	G2M	E14.5	0	0
ATCATGGGTTCCGTCT-1	E14.5	9529	2399	3.3057	9446	2398	-0.164109	-0.258585	G1	E14.5	2	2
ATCCACCAGCGTGAGT-1	E14.5	32198	5477	3.1151	9710	2799	-0.126779	0.253508	G2M	E14.5	18	18
ATCCACCAGTTGTAGA-1	E14.5	12556	3167	3.01848	10106	3160	0.140541	-0.0482333	S	E14.5	14	14
ATCCACCGTCACACGC-1	E14.5	9791	2984	2.62486	9584	2984	-0.0505941	0.647818	G2M	E14.5	0	0
ATCCACCTCACTCTTA-1	E14.5	7006	2033	3.22581	8761	2034	-0.00358042	-0.130371	G1	E14.5	2	2
ATCCACCTCGACGGAA-1	E14.5	11725	2968	3.13006	10003	2967	-0.0881081	-0.246349	G1	E14.5	0	0
ATCCGAAAGACCTTTG-1	E14.5	9156	2600	3.07995	9254	2599	0.108211	-0.00338091	S	E14.5	0	0
ATCCGAAAGAGCCTAG-1	E14.5	18457	4053	3.32665	10449	3635	0.0553841	-0.0323284	S	E14.5	11	11
ATCCGAAAGAGGTTGC-1	E14.5	6584	2147	3.59964	8638	2151	0.173365	-0.12897	S	E14.5	0	0
ATCCGAAAGAGTCTGG-1	E14.5	8972	2282	2.16228	9177	2281	0.160083	-0.057766	S	E14.5	8	8
ATCCGAACAATCTACG-1	E14.5	15686	3647	2.30142	10220	3545	0.392675	-0.0773455	S	E14.5	5	5
ATCCGAAGTCGCGTGT-1	E14.5	7236	2182	4.20122	8745	2182	0.177757	0.0399018	S	E14.5	3	3
ATCCGAATCGGTCTAA-1	E14.5	11718	2459	2.31268	9886	2458	-0.0703114	0.117025	G2M	E14.5	13	13
ATCCGAATCTTAGCCC-1	E14.5	8172	2283	3.94028	8921	2283	0.158163	0.0745857	S	E14.5	3	3
ATCCGAATCTTGTTTG-1	E14.5	8209	2287	2.76526	8942	2287	-0.204038	-0.212995	G1	E14.5	12	12
ATCGAGTAGAAAGTGG-1	E14.5	9708	2750	2.637	9541	2750	0.20836	-0.266064	S	E14.5	9	9
ATCGAGTAGAAGGACA-1	E14.5	10108	2965	2.49307	9704	2964	-0.108122	-0.246303	G1	E14.5	9	9
ATCGAGTAGCCCAACC-1	E14.5	6283	2210	3.24686	8627	2215	0.00725258	-0.209765	S	E14.5	1	1
ATCGAGTAGGCATTGG-1	E14.5	11842	3194	1.90846	10085	3192	0.0115137	-0.0189321	S	E14.5	5	5
ATCGAGTAGGTGGGTT-1	E14.5	14215	3944	3.26416	10338	3903	-0.0476295	-0.337805	G1	E14.5	3	3
ATCGAGTAGTTCGATC-1	E14.5	8776	2724	3.09936	9082	2724	-0.204205	-0.251838	G1	E14.5	0	0
ATCGAGTCAGGGATTG-1	E14.5	7857	2191	3.33461	8878	2191	0.123751	-0.000887746	S	E14.5	2	2
ATCGAGTCATAAAGGT-1	E14.5	15719	3501	1.99122	10213	3351	0.161115	0.198356	G2M	E14.5	16	16
ATCGAGTCATCGACGC-1	E14.5	12901	3185	2.45717	10176	3171	-0.13531	-0.213435	G1	E14.5	8	8
ATCGAGTGTCGAATCT-1	E14.5	11564	3128	2.37807	10010	3127	-0.0679466	0.35523	G2M	E14.5	15	15
ATCGAGTGTGGTCTCG-1	E14.5	10191	3018	3.54234	9724	3016	-0.237786	-0.299099	G1	E14.5	5	5
ATCGAGTGTTAAGATG-1	E14.5	7708	2237	3.99585	8839	2237	-0.0791209	-0.240719	G1	E14.5	4	4
ATCGAGTTCCGTTGTC-1	E14.5	9319	2877	2.69342	9318	2876	-0.152904	-0.339112	G1	E14.5	6	6
ATCGAGTTCTGACCTC-1	E14.5	5456	2018	4.52713	8466	2048	-0.174617	-0.247471	G1	E14.5	11	11
ATCTACTAGAAGGTGA-1	E14.5	17407	3885	3.03901	10359	3601	-0.162758	0.179415	G2M	E14.5	2	2
ATCTACTAGATCTGCT-1	E14.5	6742	2150	2.35835	8666	2152	-0.198143	-0.181003	G1	E14.5	0	0
ATCTACTAGCGTCAAG-1	E14.5	27096	4984	3.81606	9581	2782	0.0245308	-0.173861	S	E14.5	12	12
ATCTACTAGGCCATAG-1	E14.5	13054	3517	2.42071	10192	3508	0.0157644	-0.200704	S	E14.5	0	0
ATCTACTAGGCCCTCA-1	E14.5	5986	2084	2.42232	8566	2096	-0.142271	0.703315	G2M	E14.5	0	0
ATCTACTAGGGATGGG-1	E14.5	7947	2360	2.70542	8876	2360	0.0122042	-0.270798	S	E14.5	0	0
ATCTACTCAACTGGCC-1	E14.5	5643	2089	2.37462	8488	2107	0.275592	0.0211016	S	E14.5	0	0
ATCTACTCACCGAATT-1	E14.5	11717	2724	2.64573	9967	2723	0.11032	-0.226036	S	E14.5	15	15
ATCTACTCACTGAAGG-1	E14.5	6257	2153	2.12562	8612	2154	-0.115862	-0.247693	G1	E14.5	4	4
ATCTACTGTGCCTGTG-1	E14.5	6349	2117	3.66987	8624	2120	0.00152143	0.124465	G2M	E14.5	10	10
ATCTACTGTGGCAAAC-1	E14.5	5832	2143	2.74348	8532	2158	-0.185541	-0.181746	G1	E14.5	9	9
ATCTACTGTTACGTCA-1	E14.5	6711	2246	2.68216	8630	2248	0.0110647	-0.236973	S	E14.5	4	4
ATCTACTTCACTTATC-1	E14.5	18736	4422	2.62596	10522	4036	0.00566538	-0.122836	S	E14.5	3	3
ATCTACTTCAGCTTAG-1	E14.5	13696	3496	2.73072	10249	3464	-0.230059	-0.261766	G1	E14.5	14	14
ATCTACTTCATGCAAC-1	E14.5	7006	2242	3.08307	8701	2243	-0.00285254	-0.220224	G1	E14.5	1	1
ATCTACTTCCTAGAAC-1	E14.5	12073	3163	3.1061	10069	3161	-0.177285	-0.330759	G1	E14.5	4	4
ATCTACTTCGGAAACG-1	E14.5	11249	2670	2.8447	9920	2668	-0.0953928	0.108006	G2M	E14.5	16	16
ATCTGCCAGCCAGTTT-1	E14.5	5374	2023	3.31224	8493	2050	-0.105497	-0.131952	G1	E14.5	4	4
ATCTGCCAGTTCGATC-1	E14.5	5800	2240	3.12069	8469	2255	0.200497	-0.0357078	S	E14.5	1	1
ATCTGCCCAAACTGCT-1	E14.5	11427	2762	3.2992	9916	2762	0.272665	-0.0489719	S	E14.5	2	2
ATCTGCCCATTGCGGC-1	E14.5	8415	2238	4.12359	9028	2237	-0.124389	-0.227488	G1	E14.5	5	5
ATCTGCCGTAAAGTCA-1	E14.5	7859	2015	3.19379	8902	2015	-0.0481567	0.220341	G2M	E14.5	2	2
ATCTGCCGTACAGACG-1	E14.5	6954	2437	2.07075	8606	2438	-0.00741149	-0.294067	G1	E14.5	1	1
ATCTGCCTCAGAGACG-1	E14.5	9613	2739	3.46406	9487	2739	0.0537996	-0.0565781	S	E14.5	5	5
ATCTGCCTCAGGTTCA-1	E14.5	8750	2724	2.82286	9058	2724	0.106316	-0.259188	S	E14.5	9	9
ATCTGCCTCCGGCACA-1	E14.5	9067	2283	3.24253	9228	2282	0.134312	-0.109819	S	E14.5	0	0
ATGAGGGAGGAATGGA-1	E14.5	15870	3979	3.27662	10381	3847	-0.260446	-0.362241	G1	E14.5	11	11
ATGAGGGAGGGTCTCC-1	E14.5	11856	2193	1.417	9861	2188	-0.0197518	-0.195708	G1	E14.5	13	13
ATGAGGGAGGTCGGAT-1	E14.5	6270	2079	3.7799	8632	2080	0.168583	-0.00363993	S	E14.5	0	0
ATGAGGGAGTGTACGG-1	E14.5	9054	2752	2.99315	9187	2752	-0.191806	-0.262935	G1	E14.5	1	1
ATGAGGGCAAGCCATT-1	E14.5	8432	2114	3.23767	9035	2114	-0.138261	-0.202662	G1	E14.5	2	2
ATGAGGGCATATACCG-1	E14.5	6645	2220	2.97968	8624	2225	-0.0189234	-0.268715	G1	E14.5	1	1
ATGAGGGGTAGCCTAT-1	E14.5	16586	3696	2.83372	10332	3521	0.108674	-0.0205926	S	E14.5	7	7
ATGAGGGGTAGCGCAA-1	E14.5	20107	4108	2.48172	10520	3549	0.154387	-0.282067	S	E14.5	7	7
ATGAGGGGTTTCGCTC-1	E14.5	10936	3062	2.69751	9894	3061	-0.073176	-0.037923	G1	E14.5	0	0
ATGAGGGTCACATACG-1	E14.5	20366	4514	3.36345	10437	3794	-0.0197175	0.0778231	G2M	E14.5	12	12
ATGAGGGTCCGCGTTT-1	E14.5	18315	4147	2.95932	10442	3772	0.0188637	-0.133293	S	E14.5	0	0
ATGAGGGTCGGCATCG-1	E14.5	10441	2620	3.66823	9755	2620	0.146147	-0.106569	S	E14.5	2	2
ATGAGGGTCTACTCAT-1	E14.5	14115	3654	3.19518	10322	3610	0.0207761	-0.212091	S	E14.5	8	8
ATGCGATAGACAGGCT-1	E14.5	8315	2304	2.02044	8973	2302	0.135415	0.0872997	S	E14.5	0	0
ATGCGATAGAGAGCTC-1	E14.5	8582	2118	3.21603	9066	2115	0.131042	0.0163959	S	E14.5	8	8
ATGCGATAGTACGTAA-1	E14.5	8415	2631	2.04397	8962	2631	-0.127118	-0.229763	G1	E14.5	4	4
ATGCGATCAAGTACCT-1	E14.5	6695	2180	3.40553	8594	2185	-0.163744	-0.220741	G1	E14.5	8	8
ATGCGATCACGAAACG-1	E14.5	6615	2248	3.09902	8617	2250	-0.153091	-0.238765	G1	E14.5	1	1
ATGCGATCATCTATGG-1	E14.5	6413	2063	1.71527	8671	2067	0.229649	-0.0980692	S	E14.5	6	6
ATGCGATGTCAGAAGC-1	E14.5	9271	2562	3.32219	9290	2562	0.300874	-0.0407989	S	E14.5	3	3
ATGCGATGTCCGAAGA-1	E14.5	10844	3125	3.20915	9907	3125	-0.142102	-0.262316	G1	E14.5	1	1
ATGCGATGTCTTCGTC-1	E14.5	11549	3265	3.29033	10045	3265	-0.22705	0.311398	G2M	E14.5	3	3
ATGCGATTCACTTCAT-1	E14.5	21836	4696	2.55999	10298	3656	-0.117025	-0.0764465	G1	E14.5	15	15
ATGCGATTCAGAGACG-1	E14.5	10463	2840	3.40247	9790	2839	-0.110408	0.424104	G2M	E14.5	14	14
ATGCGATTCCATGAAC-1	E14.5	7205	2510	3.31714	8660	2510	-0.0255864	0.267931	G2M	E14.5	1	1
ATGCGATTCCCGGATG-1	E14.5	12573	3385	2.67239	10126	3377	-0.233427	-0.325211	G1	E14.5	0	0
ATGCGATTCTTTAGTC-1	E14.5	6975	2016	2.85305	8756	2016	-0.141927	-0.0886801	G1	E14.5	2	2
ATGGGAGAGTGGCACA-1	E14.5	6884	2109	2.96339	8694	2107	0.075027	-0.0209315	S	E14.5	1	1
ATGGGAGCAAGTCATC-1	E14.5	6392	2283	2.48748	8574	2284	-0.0573001	0.307181	G2M	E14.5	6	6
ATGGGAGGTCAAGCGA-1	E14.5	7583	2479	4.16722	8758	2478	-0.0830802	-0.195146	G1	E14.5	5	5
ATGGGAGTCGCCAAAT-1	E14.5	6196	2249	3.5991	8591	2255	-0.0331215	-0.302749	G1	E14.5	9	9
ATGGGAGTCTCGTATT-1	E14.5	7798	2642	2.79559	8751	2640	0.215641	0.0335369	S	E14.5	1	1
ATGTGTGAGAGTCGGT-1	E14.5	22854	4501	3.32983	10160	3337	-0.0355774	0.256174	G2M	E14.5	2	2
ATGTGTGAGGGTGTGT-1	E14.5	28793	5507	2.62217	9649	3078	0.114413	0.398309	G2M	E14.5	14	14
ATGTGTGAGTAGATGT-1	E14.5	10264	2779	2.44544	9710	2779	-0.15844	-0.128318	G1	E14.5	4	4
ATGTGTGAGTGGACGT-1	E14.5	10562	2511	3.0676	9742	2511	-0.241432	-0.186265	G1	E14.5	2	2
ATGTGTGCAGGCTGAA-1	E14.5	8223	2572	3.1497	8904	2572	-0.0969145	-0.261925	G1	E14.5	1	1
ATGTGTGGTATGCTTG-1	E14.5	6282	2166	3.08819	8620	2173	-0.00231622	0.186067	G2M	E14.5	3	3
ATGTGTGGTCCGAATT-1	E14.5	6763	2426	3.38607	8579	2428	-0.108056	-0.279273	G1	E14.5	5	5
ATGTGTGGTTAAGATG-1	E14.5	9338	2353	3.78025	9338	2353	0.0120754	-0.00376328	S	E14.5	0	0
ATGTGTGTCATGTCCC-1	E14.5	13222	3442	2.17819	10227	3431	0.0819587	0.0583694	S	E14.5	1	1
ATGTGTGTCGTTACAG-1	E14.5	8288	2482	3.17326	8941	2482	0.0425575	0.11093	G2M	E14.5	2	2
ATTACTCAGAACAATC-1	E14.5	7110	2271	2.43319	8711	2271	0.109723	0.154873	G2M	E14.5	3	3
ATTACTCCAACGCACC-1	E14.5	14051	3654	2.66173	10275	3623	-0.273204	-0.299825	G1	E14.5	0	0
ATTACTCCAGATCGGA-1	E14.5	12653	2873	2.83727	10043	2868	-0.182931	-0.0350735	G1	E14.5	2	2
ATTACTCCATGGGAAC-1	E14.5	25820	5242	2.64136	9944	3342	0.0385416	-0.0850684	S	E14.5	1	1
ATTACTCGTCGCGAAA-1	E14.5	7557	2449	2.40836	8751	2449	-0.146429	-0.289655	G1	E14.5	0	0
ATTACTCGTGTGGCTC-1	E14.5	10494	3149	3.91652	9819	3149	-0.0674327	-0.149383	G1	E14.5	0	0
ATTACTCGTTATTCTC-1	E14.5	12455	3123	2.13569	10092	3115	-0.036926	0.310906	G2M	E14.5	14	14
ATTACTCTCACAAACC-1	E14.5	5685	2222	2.23395	8457	2233	-0.0808477	-0.271476	G1	E14.5	0	0
ATTACTCTCGCCATAA-1	E14.5	13596	3881	2.68461	10349	3853	0.0450761	0.275513	G2M	E14.5	0	0
ATTACTCTCTCAAACG-1	E14.5	11991	2849	2.46852	9995	2849	-0.125057	-0.0482355	G1	E14.5	2	2
ATTACTCTCTCCAGGG-1	E14.5	17952	3910	3.30882	10370	3555	0.179505	-0.175941	S	E14.5	0	0
ATTACTCTCTCTTGAT-1	E14.5	7464	2461	2.78671	8708	2460	0.315918	-0.126075	S	E14.5	5	5
ATTATCCCACGAGAGT-1	E14.5	9656	2773	2.64085	9519	2773	0.137681	0.14627	G2M	E14.5	6	6
ATTATCCCAGCAGTTT-1	E14.5	10798	3015	2.73199	9872	3014	-0.0853946	-0.264469	G1	E14.5	1	1
ATTATCCCATCGGAAG-1	E14.5	12122	2837	2.16136	10008	2836	0.0447812	-0.27827	S	E14.5	15	15
ATTATCCGTATGCTTG-1	E14.5	9722	2787	3.62065	9543	2787	-0.0831786	-0.278457	G1	E14.5	4	4
ATTATCCGTATTCTCT-1	E14.5	5699	2123	2.82506	8505	2142	-0.169103	-0.273888	G1	E14.5	9	9
ATTATCCTCAGGATCT-1	E14.5	13372	3602	2.37063	10278	3597	-0.130195	-0.294125	G1	E14.5	1	1
ATTCTACAGATCGATA-1	E14.5	7521	2693	3.58995	8684	2693	-0.00208726	0.649295	G2M	E14.5	1	1
ATTCTACAGCTGAAAT-1	E14.5	6547	2295	2.67298	8608	2300	0.392197	-0.037882	S	E14.5	4	4
ATTCTACCAGGTGCCT-1	E14.5	7084	2356	2.73857	8686	2356	0.384608	-0.136716	S	E14.5	0	0
ATTCTACGTAGCGTAG-1	E14.5	29283	5209	2.38022	9489	2694	0.0846369	0.288532	G2M	E14.5	2	2
ATTCTACGTCAGTGGA-1	E14.5	19014	4402	2.58757	10533	3963	-0.218258	0.547561	G2M	E14.5	3	3
ATTCTACTCTGGTGTA-1	E14.5	18119	4111	2.01998	10556	3830	-0.0446218	0.500342	G2M	E14.5	0	0
ATTGGACAGATGCCAG-1	E14.5	12853	2996	2.8398	10084	2991	0.0743834	0.155493	G2M	E14.5	2	2
ATTGGACAGCTAGCCC-1	E14.5	6873	2199	3.84112	8662	2200	-0.146736	0.281691	G2M	E14.5	3	3
ATTGGACAGTACACCT-1	E14.5	8215	2617	3.39623	8892	2617	-0.053492	0.27097	G2M	E14.5	10	10
ATTGGACAGTGAAGAG-1	E14.5	18348	4286	3.13386	10513	3923	-0.0458406	0.00601279	G2M	E14.5	4	4
ATTGGACCACGTAAGG-1	E14.5	22331	4834	2.62863	10349	3753	0.0336641	-0.186042	S	E14.5	1	1
ATTGGACCAGGACGTA-1	E14.5	6885	2256	2.7451	8663	2258	0.140891	-0.101532	S	E14.5	6	6
ATTGGACGTAAGGATT-1	E14.5	6229	2034	1.99069	8683	2037	-0.101318	0.0837357	G2M	E14.5	17	17
ATTGGACGTAGGAGTC-1	E14.5	8949	2290	3.94457	9183	2290	0.0778806	-0.0533796	S	E14.5	2	2
ATTGGACGTTTGTTGG-1	E14.5	6767	2214	3.33974	8636	2214	0.000189242	-0.24421	S	E14.5	1	1
ATTGGACTCATTTGGG-1	E14.5	6383	2040	2.86699	8653	2043	-0.0502074	-0.137748	G1	E14.5	0	0
ATTGGACTCCAAGCCG-1	E14.5	9388	2479	2.39668	9386	2478	0.194409	-0.16811	S	E14.5	8	8
ATTGGACTCTGCTGCT-1	E14.5	5436	2050	4.74614	8459	2072	0.168803	0.082577	S	E14.5	4	4
ATTGGTGAGCCATCGC-1	E14.5	9360	2712	3.08761	9359	2711	-0.094736	-0.313178	G1	E14.5	14	14
ATTGGTGAGGCTAGCA-1	E14.5	10415	3040	3.67739	9780	3039	0.00174729	-0.0838318	S	E14.5	4	4
ATTGGTGAGTCTCCTC-1	E14.5	10722	2737	2.19176	9821	2734	-0.177859	-0.327183	G1	E14.5	12	12
ATTGGTGCAATCCAAC-1	E14.5	6827	2345	3.67658	8617	2344	-0.0476833	-0.262517	G1	E14.5	1	1
ATTGGTGCACAGACTT-1	E14.5	8076	2614	3.40515	8798	2610	-0.185282	-0.175405	G1	E14.5	5	5
ATTGGTGCACCGAATT-1	E14.5	15264	3358	2.80398	10108	3243	0.110202	-0.2464	S	E14.5	2	2
ATTGGTGCACCTCGTT-1	E14.5	8341	2430	2.9373	8966	2429	0.0264948	-0.284729	S	E14.5	5	5
ATTGGTGTCAGTCCCT-1	E14.5	12494	2949	2.2891	10071	2946	0.213903	-0.0988923	S	E14.5	2	2
ATTGGTGTCATCGCTC-1	E14.5	8261	2610	2.8568	8920	2610	0.295139	-0.0523407	S	E14.5	0	0
ATTGGTGTCCGGCACA-1	E14.5	13191	3262	2.25154	10161	3238	0.203722	-0.203553	S	E14.5	16	16
ATTGGTGTCCTGTAGA-1	E14.5	5830	2002	3.13894	8556	2015	-0.170614	-0.202308	G1	E14.5	4	4
ATTTCTGAGAAACCAT-1	E14.5	7718	2063	2.94118	8864	2063	0.117431	0.11608	S	E14.5	2	2
ATTTCTGAGCAAATCA-1	E14.5	9573	2812	1.98475	9484	2811	-0.15287	0.332209	G2M	E14.5	0	0
ATTTCTGAGGGTCTCC-1	E14.5	12937	3090	2.37304	10079	3081	-0.182016	-0.272726	G1	E14.5	6	6
ATTTCTGAGTCTCAAC-1	E14.5	8657	2238	3.06111	9078	2237	0.0301233	-0.227337	S	E14.5	12	12
ATTTCTGCAGACTCGC-1	E14.5	9106	2907	3.20668	9216	2905	0.275166	0.0300485	S	E14.5	0	0
ATTTCTGCATCCCATC-1	E14.5	7496	2485	2.01441	8742	2485	-0.0665992	0.625413	G2M	E14.5	4	4
ATTTCTGCATTGTGCA-1	E14.5	5649	2013	3.1687	8514	2022	-0.21679	-0.205522	G1	E14.5	0	0
CAACCAAAGACCTAGG-1	E14.5	8325	2641	3.24324	8916	2641	0.292036	-0.152535	S	E14.5	5	5
CAACCAAAGATATACG-1	E14.5	13811	2757	1.95496	10063	2711	0.206531	0.00126085	S	E14.5	13	13
CAACCAAAGGCATGGT-1	E14.5	10380	2679	3.37187	9727	2679	0.317987	0.00468725	S	E14.5	2	2
CAACCAACAAGAGGCT-1	E14.5	8865	2764	2.35759	9118	2764	-0.0720224	-0.252149	G1	E14.5	0	0
CAACCAACATAAGACA-1	E14.5	8052	2531	2.74466	8866	2529	-0.101033	-0.192198	G1	E14.5	4	4
CAACCAACATGTAGTC-1	E14.5	6016	2028	2.59309	8589	2039	0.223001	-0.185672	S	E14.5	5	5
CAACCAAGTACTTCTT-1	E14.5	10896	3320	2.7533	9963	3320	-0.335728	-0.337622	G1	E14.5	9	9
CAACCAAGTTGAACTC-1	E14.5	12851	3004	2.76243	10068	2995	0.267026	-0.176285	S	E14.5	0	0
CAACCAAGTTTGTTGG-1	E14.5	8665	2764	2.46971	9036	2764	-0.131158	-0.266068	G1	E14.5	0	0
CAACCAATCCGAATGT-1	E14.5	10673	3011	3.89769	9846	3011	-0.103984	-0.257046	G1	E14.5	9	9
CAACCAATCGAATGGG-1	E14.5	6127	2279	3.42745	8555	2285	-0.0875853	-0.257884	G1	E14.5	1	1
CAACCAATCTATCCTA-1	E14.5	22219	4403	2.34034	10247	3347	0.0969562	0.2687	G2M	E14.5	2	2
CAACCTCAGATCTGCT-1	E14.5	6558	2296	3.78164	8580	2302	-0.106079	0.40205	G2M	E14.5	10	10
CAACCTCAGTCCCACG-1	E14.5	10739	2754	2.52351	9822	2754	0.066427	-0.0013974	S	E14.5	2	2
CAACCTCCACTTGGAT-1	E14.5	7639	2330	2.29088	8809	2330	0.0509682	0.0695104	G2M	E14.5	4	4
CAACCTCCAGGCTGAA-1	E14.5	12518	3366	3.07557	10153	3363	-0.011455	0.122586	G2M	E14.5	1	1
CAACCTCCATTACGAC-1	E14.5	26185	4503	2.61218	9613	2595	-0.0412348	-0.0806772	G1	E14.5	4	4
CAACCTCGTATAGGTA-1	E14.5	7012	2025	2.69538	8716	2026	-0.00250846	-0.131327	G1	E14.5	14	14
CAACCTCTCAATACCG-1	E14.5	7118	2083	2.75358	8762	2082	0.0311266	-0.0362261	S	E14.5	2	2
CAACCTCTCACCCTCA-1	E14.5	5988	2145	1.90381	8553	2161	0.126166	-0.181596	S	E14.5	4	4
CAACCTCTCCAAATGC-1	E14.5	17700	4015	3.17514	10501	3729	-0.193259	0.315986	G2M	E14.5	11	11
CAACCTCTCCTGCAGG-1	E14.5	9045	2766	2.66446	9185	2766	0.296384	-0.0479381	S	E14.5	0	0
CAACCTCTCTTCTGGC-1	E14.5	7979	2512	2.48151	8849	2510	-0.0503092	-0.269361	G1	E14.5	0	0
CAACTAGAGACTTGAA-1	E14.5	6202	2317	3.74073	8590	2322	-0.000677657	-0.315528	G1	E14.5	4	4
CAACTAGAGGCTAGGT-1	E14.5	15866	3977	2.69759	10270	3855	-0.148599	-0.302467	G1	E14.5	0	0
CAACTAGAGGTGATTA-1	E14.5	5902	2221	2.74483	8486	2232	-0.105655	0.54487	G2M	E14.5	4	4
CAACTAGCAACACCCG-1	E14.5	9683	2765	3.33574	9513	2763	-0.161851	-0.281578	G1	E14.5	3	3
CAACTAGCAGTCAGCC-1	E14.5	25086	5322	3.47206	9998	3492	0.0195734	0.368782	G2M	E14.5	3	3
CAACTAGGTAAGTGTA-1	E14.5	29313	5599	2.90656	9563	3036	-0.140152	-0.225292	G1	E14.5	4	4
CAACTAGGTAGCTGCC-1	E14.5	6950	2277	2	8666	2278	-0.0930154	-0.290292	G1	E14.5	1	1
CAACTAGGTATAGGGC-1	E14.5	16117	2148	1.42706	9985	1847	-0.109835	-0.19502	G1	E14.5	13	13
CAACTAGGTCATTAGC-1	E14.5	7965	2584	2.29755	8835	2584	-0.212432	-0.270582	G1	E14.5	0	0
CAACTAGGTCTGCGGT-1	E14.5	28320	5450	2.83898	9502	2931	-0.125779	-0.142408	G1	E14.5	0	0
CAACTAGGTGTTGGGA-1	E14.5	6022	2250	2.69014	8538	2253	-0.10491	-0.213511	G1	E14.5	9	9
CAACTAGGTTCTCATT-1	E14.5	7782	2630	3.67515	8778	2629	0.15666	-0.0992905	S	E14.5	4	4
CAACTAGTCACTTATC-1	E14.5	10922	3097	3.16792	9913	3096	0.0484458	-0.0156723	S	E14.5	4	4
CAACTAGTCTCTTATG-1	E14.5	15714	3466	2.95914	10188	3283	0.030828	0.130286	G2M	E14.5	16	16
CAAGAAAAGATGTTAG-1	E14.5	7719	2844	3.42013	8701	2840	0.188736	0.0251457	S	E14.5	1	1
CAAGAAACACGTGAGA-1	E14.5	10830	2940	2.78855	9868	2940	-0.252851	-0.324723	G1	E14.5	0	0
CAAGAAACATGCAATC-1	E14.5	11602	3276	3.2322	10052	3274	-0.0785811	0.367714	G2M	E14.5	5	5
CAAGAAACATGCTAGT-1	E14.5	8735	2298	3.02232	9106	2297	0.317411	0.0551045	S	E14.5	2	2
CAAGAAAGTACCGGCT-1	E14.5	5231	2063	3.19251	8439	2101	-0.148091	-0.270246	G1	E14.5	9	9
CAAGAAAGTAGAGCTG-1	E14.5	8011	2223	0.711522	8885	2223	0.0835829	-0.0516475	S	E14.5	7	7
CAAGAAAGTCAAAGAT-1	E14.5	8779	2551	1.20743	9093	2551	0.0273746	-0.136502	S	E14.5	3	3
CAAGAAAGTTGGGACA-1	E14.5	9748	2777	3.016	9551	2774	-0.141452	-0.233415	G1	E14.5	5	5
CAAGAAATCACGACTA-1	E14.5	8730	2910	2.96678	9038	2910	0.120206	0.187601	G2M	E14.5	1	1
CAAGAAATCCGCTGTT-1	E14.5	7307	2510	2.57288	8677	2509	0.0333044	-0.158451	S	E14.5	1	1
CAAGAAATCCTTGCCA-1	E14.5	8357	2616	3.27869	8946	2616	0.00984069	-0.204311	S	E14.5	0	0
CAAGATCAGCCAGGAT-1	E14.5	7271	2470	2.83317	8661	2470	-0.0749268	0.677018	G2M	E14.5	0	0
CAAGATCAGCTTTGGT-1	E14.5	5752	2063	3.25104	8527	2073	0.0352626	0.287188	G2M	E14.5	1	1
CAAGATCGTGAGGCTA-1	E14.5	27412	5063	2.99504	9463	2722	-0.0674417	0.0799145	G2M	E14.5	0	0
CAAGATCGTTCAGCGC-1	E14.5	14203	3654	3.40773	10244	3600	-0.00870327	-0.342977	G1	E14.5	5	5
CAAGATCTCACAACGT-1	E14.5	8430	2579	2.95374	8963	2579	-0.200464	-0.312927	G1	E14.5	1	1
CAAGATCTCCAGTATG-1	E14.5	6586	2122	3.43152	8638	2125	0.122021	-0.0695982	S	E14.5	3	3
CAAGATCTCTGGAGCC-1	E14.5	12750	2829	3.52941	10017	2822	0.0385555	0.0593056	G2M	E14.5	2	2
CAAGGCCAGACGCACA-1	E14.5	9183	2537	3.68071	9273	2537	-0.121559	-0.161831	G1	E14.5	1	1
CAAGGCCAGAGGTAGA-1	E14.5	8794	2528	3.3773	9100	2528	-0.00475287	0.173962	G2M	E14.5	15	15
CAAGGCCAGGTTCCTA-1	E14.5	7544	2230	2.67762	8803	2230	-0.021002	0.221331	G2M	E14.5	0	0
CAAGGCCAGTTACGGG-1	E14.5	12757	3499	3.5118	10162	3495	-0.0151422	0.27529	G2M	E14.5	1	1
CAAGGCCAGTTGAGAT-1	E14.5	6928	2346	4.0127	8641	2346	0.0190514	-0.181423	S	E14.5	10	10
CAAGGCCGTCACAAGG-1	E14.5	8056	2164	2.80536	8929	2164	-0.0430611	-0.188877	G1	E14.5	12	12
CAAGGCCGTCCTGCTT-1	E14.5	12924	3420	2.97895	10177	3415	0.0398133	0.0420239	G2M	E14.5	1	1
CAAGGCCGTGTGACCC-1	E14.5	9285	2708	2.30479	9291	2708	0.0512998	0.166959	G2M	E14.5	0	0
CAAGGCCGTTAAGTAG-1	E14.5	5367	2004	3.55879	8472	2032	-0.151783	-0.184496	G1	E14.5	9	9
CAAGGCCGTTAGAACA-1	E14.5	6020	2009	3.28904	8624	2022	-0.14797	-0.264858	G1	E14.5	0	0
CAAGGCCTCCGTTGCT-1	E14.5	7174	2049	3.97268	8774	2050	0.0740907	-0.233812	S	E14.5	3	3
CAAGTTGAGTGCCAGA-1	E14.5	9887	3008	2.72074	9618	3006	-0.160604	-0.349485	G1	E14.5	0	0
CAAGTTGAGTGCGATG-1	E14.5	26869	4327	1.96881	9732	2392	0.0015775	0.190258	G2M	E14.5	16	16
CAAGTTGCACCCATGG-1	E14.5	7775	2139	2.86817	8876	2137	-0.0226838	-0.241707	G1	E14.5	0	0
CAAGTTGCAGGTCCAC-1	E14.5	6908	2280	3.41633	8671	2281	0.00654088	-0.216114	S	E14.5	1	1
CAAGTTGGTCGAAAGC-1	E14.5	8781	2289	3.05204	9125	2289	-0.126751	-0.221886	G1	E14.5	2	2
CAAGTTGGTGATAAAC-1	E14.5	8579	2304	3.62513	9063	2304	0.205182	-0.166895	S	E14.5	3	3
CAAGTTGGTGATGTGG-1	E14.5	18932	4268	2.71498	10465	3852	-0.203524	-0.127967	G1	E14.5	0	0
CAAGTTGTCAACTCTT-1	E14.5	7913	2492	3.03298	8842	2492	-0.0902983	0.519296	G2M	E14.5	0	0
CAAGTTGTCGGAGCAA-1	E14.5	9715	2934	2.88214	9545	2932	-0.0277859	0.604959	G2M	E14.5	6	6
CACAAACGTCTAGTGT-1	E14.5	16643	3588	2.76993	10268	3392	-0.0826444	-0.16623	G1	E14.5	7	7
CACAAACGTTACCGAT-1	E14.5	18217	4272	2.91486	10485	3911	-0.232259	-0.305382	G1	E14.5	1	1
CACAAACTCCAGTAGT-1	E14.5	9855	2843	3.43988	9586	2843	-0.140635	-0.2279	G1	E14.5	10	10
CACAAACTCCATGAAC-1	E14.5	7636	2369	2.95966	8783	2368	0.0345271	-0.210789	S	E14.5	1	1
CACAAACTCTCGCTTG-1	E14.5	6889	2187	3.26608	8704	2186	0.229564	-0.134846	S	E14.5	3	3
CACAAACTCTTGTTTG-1	E14.5	6318	2048	4.51092	8661	2058	0.0701045	0.131737	G2M	E14.5	3	3
CACACAAAGGGATGGG-1	E14.5	17791	4137	3.35563	10482	3852	0.100813	0.366118	G2M	E14.5	4	4
CACACAAGTGCGGTAA-1	E14.5	11494	3265	3.01027	10019	3263	-0.263799	-0.279719	G1	E14.5	0	0
CACACAAGTGGCAAAC-1	E14.5	6551	2119	2.80873	8643	2122	-0.144958	-0.191492	G1	E14.5	0	0
CACACAAGTTATGTGC-1	E14.5	7501	2445	4.79936	8734	2445	-0.106537	-0.284463	G1	E14.5	1	1
CACACAAGTTGAACTC-1	E14.5	7676	2471	3.63471	8777	2471	0.0917055	0.0874088	S	E14.5	1	1
CACACAATCAGTTAGC-1	E14.5	9179	2972	2.3532	9245	2972	0.240313	0.525363	G2M	E14.5	1	1
CACACAATCCGGGTGT-1	E14.5	7197	2102	3.16799	8767	2102	0.107308	-0.198222	S	E14.5	5	5
CACACAATCTCGCATC-1	E14.5	6764	2020	2.7942	8717	2021	0.17622	-0.00320444	S	E14.5	0	0
CACACCTAGCTACCGC-1	E14.5	12726	3366	2.47525	10165	3361	0.0485532	-0.138315	S	E14.5	1	1
CACACCTAGGAACTGC-1	E14.5	13970	3149	2.49105	10133	3106	-0.163271	-0.196391	G1	E14.5	2	2
CACACCTAGGTTACCT-1	E14.5	13001	3377	2.94593	10147	3364	-0.105849	-0.328834	G1	E14.5	0	0
CACACCTCAAGCTGTT-1	E14.5	6011	2252	3.02778	8529	2268	-0.176337	-0.209824	G1	E14.5	7	7
CACACCTCATAGACTC-1	E14.5	10488	3168	2.41228	9821	3168	0.137594	0.546355	G2M	E14.5	6	6
CACACCTCATCACGTA-1	E14.5	12539	3114	2.75939	10107	3108	0.0156642	-0.257715	S	E14.5	5	5
CACACCTGTGCACTTA-1	E14.5	7392	2144	2.93561	8776	2144	0.0624336	-0.242451	S	E14.5	0	0
CACACCTTCAGTACGT-1	E14.5	9462	2578	2.81124	9423	2578	0.0754465	-0.119541	S	E14.5	8	8
CACACCTTCTACCAGA-1	E14.5	11659	3150	2.93336	10019	3150	0.158248	-0.0455696	S	E14.5	4	4
CACACTCAGAGCTATA-1	E14.5	10273	2741	2.53091	9722	2741	-0.0938669	0.506268	G2M	E14.5	6	6
CACACTCAGCTGATAA-1	E14.5	5420	2052	2.25092	8444	2082	-0.131888	-0.28062	G1	E14.5	9	9
CACACTCAGTCGCCGT-1	E14.5	18243	4381	3.23412	10514	3986	-0.192604	-0.281184	G1	E14.5	5	5
CACACTCCAACACGCC-1	E14.5	19234	4182	1.97047	10553	3764	-0.0123754	0.402666	G2M	E14.5	2	2
CACACTCCACAGAGGT-1	E14.5	6636	2118	2.42616	8648	2118	-0.0262287	0.171725	G2M	E14.5	0	0
CACACTCCATACTCTT-1	E14.5	5692	2193	2.31904	8463	2210	-0.129751	-0.281553	G1	E14.5	9	9
CACACTCGTAACGACG-1	E14.5	22324	4442	2.25766	10186	3339	0.116825	-0.279701	S	E14.5	2	2
CACACTCGTCCTAGCG-1	E14.5	28729	5471	3.68617	9581	2910	-0.211604	-0.196969	G1	E14.5	7	7
CACACTCGTGCAGACA-1	E14.5	7166	2054	3.97711	8768	2054	-0.133885	-0.173537	G1	E14.5	6	6
CACACTCGTTTAGCTG-1	E14.5	6962	2302	2.54237	8660	2302	0.198173	0.152352	S	E14.5	0	0
CACACTCGTTTCGCTC-1	E14.5	6608	2179	3.63196	8620	2183	-0.143871	-0.225923	G1	E14.5	5	5
CACACTCTCACAACGT-1	E14.5	14715	3944	2.62317	10250	3871	-0.205594	-0.324167	G1	E14.5	9	9
CACACTCTCAGTCAGT-1	E14.5	9471	2688	2.00612	9426	2688	-0.131618	0.424808	G2M	E14.5	1	1
CACACTCTCCAAATGC-1	E14.5	9553	3001	3.52769	9457	3001	-0.15874	-0.235794	G1	E14.5	1	1
CACACTCTCCTGCAGG-1	E14.5	13129	3492	2.96291	10213	3485	0.0547847	-0.2943	S	E14.5	1	1
CACACTCTCGTCTGCT-1	E14.5	7515	2402	2.74118	8765	2402	-0.176718	-0.227263	G1	E14.5	0	0
CACAGGCAGGAATCGC-1	E14.5	6774	2404	3.12961	8608	2406	-0.209156	-0.234238	G1	E14.5	0	0
CACAGGCAGTGAAGTT-1	E14.5	16945	3745	2.15403	10336	3535	-0.0607972	0.25541	G2M	E14.5	15	15
CACAGGCCAGGCTGAA-1	E14.5	7963	2342	3.44091	8871	2342	-0.0278008	0.278127	G2M	E14.5	3	3
CACAGGCGTCTAGCGC-1	E14.5	10201	2965	3.24478	9717	2964	0.4265	-0.0311064	S	E14.5	5	5
CACAGTAAGAACTGTA-1	E14.5	13396	3376	3.0009	10204	3361	0.0248479	-0.24916	S	E14.5	3	3
CACAGTAAGATTACCC-1	E14.5	8857	2644	3.17263	9125	2644	0.176965	-0.00438744	S	E14.5	4	4
CACAGTAAGGCCCTCA-1	E14.5	10391	2951	2.76201	9777	2951	-0.166687	-0.271966	G1	E14.5	1	1
CACAGTAAGTTGCAGG-1	E14.5	10015	2482	2.84573	9618	2482	-0.0982062	-0.034725	G1	E14.5	2	2
CACAGTACAATGGAGC-1	E14.5	7745	2383	2.80181	8780	2381	-0.1152	0.245222	G2M	E14.5	11	11
CACAGTACACACTGCG-1	E14.5	7316	2167	2.67906	8785	2167	-0.124874	-0.170503	G1	E14.5	0	0
CACAGTACAGATGGGT-1	E14.5	7119	2417	2.7251	8666	2417	-0.144363	-0.242697	G1	E14.5	0	0
CACAGTAGTCACCTAA-1	E14.5	10519	2874	2.84248	9782	2874	-0.11784	-0.237779	G1	E14.5	4	4
CACAGTAGTGAAAGAG-1	E14.5	9329	2836	3.93397	9330	2836	0.0979325	0.125415	G2M	E14.5	11	11
CACAGTAGTGTTGAGG-1	E14.5	7295	2413	3.37217	8701	2413	0.0368273	0.0419896	G2M	E14.5	3	3
CACAGTAGTTGAGGTG-1	E14.5	9723	2564	3.65114	9532	2563	0.204251	-0.111226	S	E14.5	4	4
CACAGTATCAGCTTAG-1	E14.5	7237	2277	2.4734	8729	2277	-0.118656	-0.257423	G1	E14.5	1	1
CACAGTATCATGTCCC-1	E14.5	10151	2474	2.49237	9648	2474	-0.00406266	-0.157936	G1	E14.5	2	2
CACAGTATCCAACCAA-1	E14.5	8491	2733	3.07384	8980	2733	0.173991	-0.248381	S	E14.5	11	11
CACAGTATCCTATGTT-1	E14.5	7104	2180	4.53266	8721	2180	-0.138361	0.333302	G2M	E14.5	3	3
CACAGTATCTATGTGG-1	E14.5	8595	2570	2.5829	9024	2569	0.234408	0.0615711	S	E14.5	5	5
CACAGTATCTGAGTGT-1	E14.5	12174	3274	2.22606	10095	3271	-0.28347	-0.283925	G1	E14.5	12	12
CACATAGAGATAGCAT-1	E14.5	6736	2186	2.76128	8647	2186	-0.159829	-0.218072	G1	E14.5	4	4
CACATAGAGCGCCTTG-1	E14.5	13811	3602	2.89624	10270	3581	0.0126492	0.16942	G2M	E14.5	1	1
CACATAGCAAGTAATG-1	E14.5	8663	2622	1.997	9039	2622	-0.0615857	-0.334744	G1	E14.5	1	1
CACATAGCACAAGACG-1	E14.5	9011	2653	2.84097	9180	2651	-0.16198	0.703582	G2M	E14.5	1	1
CACATAGCACACAGAG-1	E14.5	15240	4255	3.21522	10272	4157	-0.047034	0.278042	G2M	E14.5	1	1
CACATAGCATCTCGCT-1	E14.5	10419	2993	3.34005	9784	2992	-0.18231	-0.175474	G1	E14.5	0	0
CACATAGGTCCGAACC-1	E14.5	6647	2035	3.56552	8681	2037	0.0645318	-0.12832	S	E14.5	2	2
CACATAGGTGCTCTTC-1	E14.5	17093	4245	2.5917	10448	4030	-0.174106	0.192117	G2M	E14.5	6	6
CACATAGGTTGGGACA-1	E14.5	10772	2950	1.70813	9869	2950	-0.0960748	0.611821	G2M	E14.5	6	6
CACATAGTCAGTGTTG-1	E14.5	6252	2143	3.07102	8621	2149	0.0826016	-0.11817	S	E14.5	1	1
CACATAGTCTACCAGA-1	E14.5	8515	2598	3.19436	8998	2596	0.00274716	0.186772	G2M	E14.5	5	5
CACATAGTCTCTTATG-1	E14.5	10615	3151	2.87329	9860	3151	-0.191714	-0.304874	G1	E14.5	4	4
CACATAGTCTCTTGAT-1	E14.5	18000	4341	2.80556	10508	4021	-0.0263737	-0.350323	G1	E14.5	4	4
CACATAGTCTTACCGC-1	E14.5	25732	4949	2.3395	9890	3047	0.120162	0.442149	G2M	E14.5	0	0
CACATAGTCTTCAACT-1	E14.5	11693	2761	1.76174	9970	2759	-0.0662143	0.325504	G2M	E14.5	13	13
CACATTTAGAAGAAGC-1	E14.5	19427	4242	2.9598	10405	3690	-0.0307353	-0.306959	G1	E14.5	4	4
CACATTTCAATAGCAA-1	E14.5	9257	2801	2.65745	9285	2801	-0.140171	-0.264342	G1	E14.5	17	17
CACATTTCACACCGAC-1	E14.5	24888	4686	2.30633	10062	3118	-0.0510755	0.621442	G2M	E14.5	7	7
CACATTTCAGTTCCCT-1	E14.5	9714	3081	2.52213	9555	3080	-0.189339	-0.260933	G1	E14.5	1	1
CACATTTCATCTCGCT-1	E14.5	18972	4073	2.8832	10479	3572	-0.00255272	0.301562	G2M	E14.5	8	8
CACATTTGTAAACGCG-1	E14.5	7364	2335	2.63444	8732	2335	0.178409	-0.145688	S	E14.5	15	15
CACATTTGTAAGAGAG-1	E14.5	9044	2644	3.86997	9191	2644	-0.150172	0.114223	G2M	E14.5	3	3
CACATTTTCCATTCTA-1	E14.5	17931	3643	1.96866	10270	3243	0.0848425	-0.0835899	S	E14.5	13	13
CACATTTTCGGAGCAA-1	E14.5	10059	3205	3.43971	9701	3205	-0.126847	-0.296438	G1	E14.5	1	1
CACATTTTCTGAAAGA-1	E14.5	7405	2383	2.79541	8733	2383	-0.108739	-0.273161	G1	E14.5	4	4
CACCACTAGAACAATC-1	E14.5	9571	2944	2.08965	9477	2944	-0.123158	-0.335588	G1	E14.5	1	1
CACCACTAGAAGCCCA-1	E14.5	12088	2863	2.42389	10038	2860	0.00933433	-0.196402	S	E14.5	8	8
CACCACTAGAGCCTAG-1	E14.5	9499	2723	2.74766	9431	2723	0.323577	0.0623112	S	E14.5	1	1
CACCACTAGGCCCTCA-1	E14.5	9945	2918	2.41327	9630	2917	0.436607	-0.0693162	S	E14.5	1	1
CACCACTAGGTTACCT-1	E14.5	10294	2798	2.30231	9743	2798	0.165234	0.0306925	S	E14.5	2	2
CACCACTAGTGCGTGA-1	E14.5	12434	3198	2.99984	10131	3190	-0.212838	-0.274191	G1	E14.5	8	8
CACCACTCAATCTACG-1	E14.5	13214	3367	3.18601	10179	3348	-0.186184	-0.251891	G1	E14.5	0	0
CACCACTCAGCCACCA-1	E14.5	17156	3860	2.66962	10361	3606	-0.17962	-0.0582807	G1	E14.5	12	12
CACCACTCAGGACCCT-1	E14.5	14742	3832	3.1746	10254	3770	0.0960132	0.0648783	S	E14.5	3	3
CACCACTCATCCCATC-1	E14.5	12056	3358	2.88653	10118	3355	-0.0441774	-0.312567	G1	E14.5	5	5
CACCACTCATTGCGGC-1	E14.5	6194	2201	3.95544	8584	2205	0.0480702	0.347512	G2M	E14.5	1	1
CACCACTGTAGAGTGC-1	E14.5	17290	3834	2.83401	10378	3581	0.251198	-0.135785	S	E14.5	7	7
CACCACTGTCGCTTTC-1	E14.5	12510	3234	2.27018	10114	3230	0.171051	-0.281686	S	E14.5	3	3
CACCACTGTTCTCATT-1	E14.5	12766	3566	2.54582	10196	3563	0.00066135	0.0112151	G2M	E14.5	0	0
CACCACTGTTGCTCCT-1	E14.5	6024	2230	2.47344	8546	2242	0.163515	0.164954	G2M	E14.5	0	0
CACCACTTCCATGAAC-1	E14.5	8171	2382	2.7414	8918	2383	-0.187531	-0.242595	G1	E14.5	3	3
CACCACTTCGTGGGAA-1	E14.5	14092	3222	2.61851	10160	3179	-0.0893786	0.0359882	G2M	E14.5	2	2
CACCAGGAGAGATGAG-1	E14.5	5871	2244	4.68404	8508	2257	0.0540712	-0.103899	S	E14.5	1	1
CACCAGGAGCCCAGCT-1	E14.5	11313	3354	3.01423	10033	3354	0.0671889	-0.238272	S	E14.5	0	0
CACCAGGAGCGTCAAG-1	E14.5	8223	2393	3.35644	8926	2393	0.0832799	0.0309244	S	E14.5	3	3
CACCAGGAGTGAAGTT-1	E14.5	8981	2758	2.80592	9166	2758	0.118344	-0.219738	S	E14.5	0	0
CACCAGGCAAGGACTG-1	E14.5	15735	3823	1.53797	10252	3704	0.0109676	0.143633	G2M	E14.5	1	1
CACCAGGCAATGGAAT-1	E14.5	8781	2449	3.7695	9117	2449	-0.0405911	-0.195955	G1	E14.5	12	12
CACCAGGCATTGTGCA-1	E14.5	14806	3204	3.00554	10116	3121	0.0646703	-0.0680334	S	E14.5	2	2
CACCAGGTCACAGTAC-1	E14.5	7373	2403	3.49925	8701	2403	0.144462	0.368716	G2M	E14.5	4	4
CACCAGGTCAGTCCCT-1	E14.5	10724	3066	2.2846	9869	3065	-0.0547876	0.254875	G2M	E14.5	6	6
CACCAGGTCTGACCTC-1	E14.5	6761	2316	1.95237	8633	2316	0.0934054	-0.239997	S	E14.5	6	6
CACCAGGTCTTTACAC-1	E14.5	8411	2754	2.50862	8946	2754	0.226836	-0.105239	S	E14.5	6	6
CACCTTGAGATCACGG-1	E14.5	11403	3074	3.24476	9988	3072	-0.0475493	-0.116878	G1	E14.5	1	1
CACCTTGAGTCCTCCT-1	E14.5	7286	2304	2.78617	8727	2303	-0.0630799	0.522943	G2M	E14.5	0	0
CACCTTGAGTGGGTTG-1	E14.5	7184	2210	2.35245	8708	2211	-0.189591	-0.236156	G1	E14.5	17	17
CACCTTGCAGCGATCC-1	E14.5	19165	4309	2.85416	10449	3830	-0.129363	-0.164219	G1	E14.5	1	1
CACCTTGCATTAGCCA-1	E14.5	16513	3654	2.81596	10285	3459	-0.00894292	0.318824	G2M	E14.5	2	2
CACCTTGGTAGATTAG-1	E14.5	30978	5835	2.7116	9572	3069	-0.22346	-0.281858	G1	E14.5	4	4
CACCTTGGTCGCTTTC-1	E14.5	6426	2252	1.85185	8625	2255	0.056142	-0.20128	S	E14.5	1	1
CACCTTGGTGCACCAC-1	E14.5	6749	2142	3.64498	8656	2146	0.0531595	-0.138609	S	E14.5	5	5
CACCTTGTCCGGGTGT-1	E14.5	10032	2394	3.16986	9614	2392	-0.228728	-0.252308	G1	E14.5	2	2
CACCTTGTCCTGCAGG-1	E14.5	8258	2661	2.84573	8908	2661	-0.177789	-0.137596	G1	E14.5	6	6
CACTCCAAGACCACGA-1	E14.5	14898	3754	2.42314	10178	3675	-0.203614	0.0438238	G2M	E14.5	0	0
CACTCCAGTAGTAGTA-1	E14.5	10007	2949	2.49825	9653	2949	-0.137012	-0.307446	G1	E14.5	4	4
CACTCCAGTCCGACGT-1	E14.5	6700	2072	3.73134	8641	2074	-0.00575876	-0.156669	G1	E14.5	8	8
CACTCCAGTGTGAAAT-1	E14.5	18854	4240	2.97019	10434	3758	0.157503	0.0156581	S	E14.5	0	0
CACTCCATCGATAGAA-1	E14.5	6625	2202	2.18868	8644	2202	-0.0991579	-0.314028	G1	E14.5	4	4
CAGAATCAGACACTAA-1	E14.5	7495	2530	2.72181	8732	2527	-0.0885795	0.398878	G2M	E14.5	4	4
CAGAATCAGCTGGAAC-1	E14.5	14481	3585	2.90726	10223	3538	0.0284685	-0.222709	S	E14.5	0	0
CAGAATCAGGGATGGG-1	E14.5	7677	2520	3.33464	8783	2520	-0.184488	0.2347	G2M	E14.5	0	0
CAGAATCAGTACGCCC-1	E14.5	8737	2662	2.52947	9075	2661	-0.11168	-0.167365	G1	E14.5	5	5
CAGAATCCAATCAGAA-1	E14.5	6498	2270	1.76978	8577	2275	-0.0710866	-0.0425406	G1	E14.5	3	3
CAGAATCCACCGAAAG-1	E14.5	13941	3386	4.68403	10244	3350	-0.0463098	-0.242402	G1	E14.5	3	3
CAGAATCCACGGCTAC-1	E14.5	7581	2252	3.28453	8806	2252	-0.124278	-0.227842	G1	E14.5	1	1
CAGAATCGTAAGGATT-1	E14.5	7675	2450	2.56678	8775	2450	-0.12987	-0.288524	G1	E14.5	1	1
CAGAATCGTCGGCTCA-1	E14.5	10708	3095	2.29735	9860	3094	-0.270588	-0.268123	G1	E14.5	5	5
CAGAATCGTCTAGCCG-1	E14.5	6584	2153	3.2503	8645	2155	-0.171978	-0.261572	G1	E14.5	1	1
CAGAATCGTCTCGTTC-1	E14.5	18387	3805	2.25159	10325	3406	0.10007	-0.227133	S	E14.5	2	2
CAGAATCGTGCGAAAC-1	E14.5	6301	2230	4.20568	8631	2234	0.130967	-0.215271	S	E14.5	4	4
CAGAATCTCAGAGCTT-1	E14.5	9740	2589	2.93634	9526	2588	-0.09978	-0.246976	G1	E14.5	17	17
CAGAATCTCCAGATCA-1	E14.5	22894	4332	2.89159	10193	3174	0.222095	0.00820372	S	E14.5	7	7
CAGAATCTCTAACTTC-1	E14.5	6389	2018	3.20864	8671	2029	0.00459346	0.291045	G2M	E14.5	4	4
CAGAGAGAGAAGGTTT-1	E14.5	5683	2164	4.15274	8441	2181	-0.091112	-0.224566	G1	E14.5	1	1
CAGAGAGAGAATGTTG-1	E14.5	6181	2115	2.60476	8617	2121	-0.0859383	0.533521	G2M	E14.5	4	4
CAGAGAGAGCCCAGCT-1	E14.5	7139	2393	3.23575	8670	2393	-0.136184	-0.268837	G1	E14.5	0	0
CAGAGAGAGTACGCCC-1	E14.5	6644	2080	3.77784	8608	2087	-0.170025	-0.247587	G1	E14.5	8	8
CAGAGAGCACGTCAGC-1	E14.5	14832	3743	2.85868	10216	3674	0.27337	-0.138498	S	E14.5	6	6
CAGAGAGCATACCATG-1	E14.5	15524	3378	2.33187	10152	3247	0.212894	0.0411228	S	E14.5	16	16
CAGAGAGGTGACTACT-1	E14.5	7546	2109	2.86244	8821	2110	-0.0801694	-0.220422	G1	E14.5	0	0
CAGAGAGGTTGTCGCG-1	E14.5	14954	3282	2.74174	10146	3173	-0.123898	-0.287651	G1	E14.5	8	8
CAGAGAGGTTTAGCTG-1	E14.5	8840	2441	3.50679	9134	2440	0.114648	-0.0334619	S	E14.5	3	3
CAGAGAGTCATTCACT-1	E14.5	7356	2463	3.05873	8716	2462	0.0389677	-0.201231	S	E14.5	0	0
CAGATCACACATTTCT-1	E14.5	5748	2161	2.81837	8513	2180	-0.105925	-0.28001	G1	E14.5	1	1
CAGATCACACGCATCG-1	E14.5	6169	2365	3.27444	8549	2376	-0.200436	-0.254725	G1	E14.5	0	0
CAGATCACAGGACCCT-1	E14.5	21044	4613	3.01274	10518	3849	-0.234195	-0.3744	G1	E14.5	11	11
CAGATCAGTAGCTAAA-1	E14.5	10355	2883	1.88315	9780	2883	-0.129049	-0.286273	G1	E14.5	4	4
CAGATCAGTTAAGTAG-1	E14.5	7848	2339	3.68247	8846	2337	0.289794	-0.198684	S	E14.5	3	3
CAGATCAGTTCCGGCA-1	E14.5	6450	2263	3.28682	8589	2265	-0.0622467	0.661088	G2M	E14.5	0	0
CAGATCATCAGTGTTG-1	E14.5	15956	3623	2.14339	10248	3496	0.262065	-0.134299	S	E14.5	0	0
CAGCAGCAGATATGCA-1	E14.5	5217	2044	2.66437	8441	2072	-0.1867	-0.256752	G1	E14.5	1	1
CAGCAGCAGCCCAATT-1	E14.5	7186	2483	3.21458	8656	2484	-0.15415	-0.289994	G1	E14.5	1	1
CAGCAGCAGTACATGA-1	E14.5	9705	2875	2.6069	9534	2875	0.0861586	0.171007	G2M	E14.5	0	0
CAGCAGCAGTTTCCTT-1	E14.5	6162	2241	2.09348	8567	2245	0.126385	-0.144985	S	E14.5	4	4
CAGCAGCCACGCCAGT-1	E14.5	6332	2025	2.51105	8670	2026	0.0776743	-0.132112	S	E14.5	0	0
CAGCAGCCATCCTTGC-1	E14.5	6185	2163	3.12045	8597	2174	0.132025	-0.133284	S	E14.5	1	1
CAGCAGCCATGTTCCC-1	E14.5	9816	2614	4.16667	9555	2613	-0.0996761	-0.287066	G1	E14.5	5	5
CAGCAGCGTAATCGTC-1	E14.5	5980	2008	3.54515	8594	2022	0.226887	-0.138053	S	E14.5	3	3
CAGCAGCGTCGGCATC-1	E14.5	11143	2881	3.22175	9904	2881	-0.0930182	-0.0907127	G1	E14.5	0	0
CAGCAGCGTCTCTCGT-1	E14.5	15183	3355	2.5028	10139	3265	0.108032	0.396755	G2M	E14.5	2	2
CAGCAGCGTGCTGTAT-1	E14.5	7000	2359	2.85714	8658	2360	-0.164322	-0.271281	G1	E14.5	0	0
CAGCAGCTCGACAGCC-1	E14.5	13060	3038	2.5804	10117	3019	0.114772	-0.0204123	S	E14.5	16	16
CAGCAGCTCGGTCTAA-1	E14.5	12462	2996	2.44744	10051	2995	0.193758	-0.118145	S	E14.5	2	2
CAGCAGCTCGTCCGTT-1	E14.5	11632	3281	3.37861	10052	3280	-0.143637	-0.188357	G1	E14.5	0	0
CAGCAGCTCGTGGACC-1	E14.5	10559	2736	3.381	9797	2734	0.272538	0.0329179	S	E14.5	8	8
CAGCATAAGCGTGAGT-1	E14.5	6980	2247	2.149	8689	2246	0.130409	-0.251519	S	E14.5	6	6
CAGCATAAGGCAGTCA-1	E14.5	8278	2620	2.66973	8921	2619	-0.121024	-0.238021	G1	E14.5	4	4
CAGCATAAGTACTTGC-1	E14.5	9220	2832	2.66811	9278	2832	-0.221421	-0.213093	G1	E14.5	0	0
CAGCATACAAATCCGT-1	E14.5	9243	3022	4.53316	9273	3022	-0.126481	0.101238	G2M	E14.5	18	18
CAGCATACAAGCCATT-1	E14.5	8277	2767	3.69699	8895	2767	0.122262	-0.186114	S	E14.5	1	1
CAGCATACACGGCCAT-1	E14.5	5378	2006	2.65898	8444	2024	-0.140686	-0.285653	G1	E14.5	9	9
CAGCATACAGCGTAAG-1	E14.5	8634	2777	2.50174	9034	2777	-0.20096	-0.273888	G1	E14.5	4	4
CAGCATACAGGGCATA-1	E14.5	9665	2812	3.15572	9515	2811	-0.224033	-0.201392	G1	E14.5	1	1
CAGCATACATGGATGG-1	E14.5	11601	3218	2.74114	10031	3218	0.00762642	0.0656371	G2M	E14.5	2	2
CAGCATAGTACGCACC-1	E14.5	12134	3439	2.28284	10145	3436	0.165421	-0.114375	S	E14.5	0	0
CAGCATATCAATACCG-1	E14.5	7322	2028	2.58126	8811	2029	-0.0290547	0.0443417	G2M	E14.5	2	2
CAGCATATCGGATGTT-1	E14.5	6265	2166	2.8731	8631	2168	-0.171193	-0.288367	G1	E14.5	0	0
CAGCATATCTGCAAGT-1	E14.5	33832	5821	2.38532	9580	2904	-0.158813	0.231	G2M	E14.5	0	0
CAGCCGAAGACCGGAT-1	E14.5	10656	2541	3.56607	9771	2541	0.294241	-0.112428	S	E14.5	2	2
CAGCCGAAGCATCATC-1	E14.5	6969	2310	2.29588	8677	2310	-0.132069	-0.197024	G1	E14.5	0	0
CAGCCGAAGGCTAGGT-1	E14.5	13749	3289	2.47291	10221	3250	0.0833334	0.0283132	S	E14.5	8	8
CAGCCGACAAGGTTTC-1	E14.5	6644	2150	3.05539	8660	2151	0.257171	-0.110815	S	E14.5	0	0
CAGCCGACACCAGATT-1	E14.5	7052	2143	3.50255	8729	2142	-0.108678	-0.17632	G1	E14.5	0	0
CAGCCGACAGCTTCGG-1	E14.5	12338	3271	2.35857	10108	3265	0.0297688	-0.0153231	S	E14.5	5	5
CAGCCGACATGGTCTA-1	E14.5	8667	2718	3.26526	9042	2718	-0.182395	-0.301317	G1	E14.5	0	0
CAGCCGAGTCATACTG-1	E14.5	8648	2766	3.11055	9020	2765	-0.0154284	-0.230721	G1	E14.5	5	5
CAGCCGAGTTAAGGGC-1	E14.5	8551	2573	2.92363	9006	2573	0.02543	0.00967887	S	E14.5	0	0
CAGCCGATCAAAGTAG-1	E14.5	14568	3435	2.47803	10176	3377	-0.0281587	-0.0657782	G1	E14.5	7	7
CAGCCGATCCTTTCGG-1	E14.5	18175	3966	2.76754	10435	3599	0.0436228	0.0278229	S	E14.5	8	8
CAGCCGATCGCGGATC-1	E14.5	13143	3719	2.92932	10269	3706	-0.212405	-0.306239	G1	E14.5	0	0
CAGCCGATCTATCGCC-1	E14.5	16643	3914	3.61113	10302	3682	-0.150475	0.1635	G2M	E14.5	3	3
CAGCGACAGATCCGAG-1	E14.5	10924	3021	2.91102	9909	3021	-0.134417	0.0258251	G2M	E14.5	8	8
CAGCGACAGTGAAGAG-1	E14.5	7785	2072	4.04624	8850	2069	-0.0888584	-0.183429	G1	E14.5	16	16
CAGCGACAGTTTGCGT-1	E14.5	11535	3242	2.86953	10024	3240	-0.109595	-0.273001	G1	E14.5	1	1
CAGCGACCAAGTTGTC-1	E14.5	10419	3112	3.23448	9807	3112	0.242241	-0.133456	S	E14.5	0	0
CAGCGACCAGGGAGAG-1	E14.5	11191	2858	3.27942	9910	2855	-0.0868946	0.128838	G2M	E14.5	3	3
CAGCGACGTAGAGGAA-1	E14.5	8163	2643	3.35661	8887	2643	0.00856366	-0.246199	S	E14.5	5	5
CAGCGACGTGTCTGAT-1	E14.5	6728	2050	2.86861	8667	2052	-0.111115	-0.186721	G1	E14.5	1	1
CAGCGACGTTGTCTTT-1	E14.5	9348	2737	2.9846	9348	2737	0.271305	-0.230349	S	E14.5	3	3
CAGCGACTCATGCAAC-1	E14.5	7154	2658	2.5021	8635	2658	-0.129334	0.106438	G2M	E14.5	1	1
CAGCGACTCCGAACGC-1	E14.5	7485	2394	2.36473	8753	2393	-0.165144	-0.0420441	G1	E14.5	0	0
CAGCGACTCGCAAACT-1	E14.5	7281	2333	2.11509	8710	2333	-0.148409	-0.227785	G1	E14.5	9	9
CAGCGACTCGGCGCTA-1	E14.5	7014	2070	4.63359	8745	2071	-0.102814	-0.244623	G1	E14.5	0	0
CAGCGACTCTAAGCCA-1	E14.5	7852	2570	3.19664	8789	2569	-0.140335	0.0595847	G2M	E14.5	1	1
CAGCGACTCTCGGACG-1	E14.5	8679	2269	2.59246	9097	2269	-0.0272201	-0.231966	G1	E14.5	2	2
CAGCGACTCTGCAGTA-1	E14.5	7299	2240	2.8086	8745	2240	0.0740264	-0.197389	S	E14.5	3	3
CAGCTAAAGCCGGTAA-1	E14.5	6528	2310	4.62623	8534	2319	0.133809	-0.230572	S	E14.5	8	8
CAGCTAACAATAACGA-1	E14.5	8143	2589	2.54206	8876	2588	-0.179783	0.456585	G2M	E14.5	4	4
CAGCTAACAGAAGCAC-1	E14.5	14859	3451	2.58429	10131	3367	0.0442218	0.201746	G2M	E14.5	0	0
CAGCTAACAGCTATTG-1	E14.5	10490	3029	3.92755	9811	3028	-0.171452	-0.315966	G1	E14.5	10	10
CAGCTAACAGTCTTCC-1	E14.5	10063	2668	2.53404	9646	2666	0.277942	-0.114063	S	E14.5	2	2
CAGCTAAGTAAACCTC-1	E14.5	8586	2538	3.03983	9023	2538	-0.0983652	-0.255281	G1	E14.5	0	0
CAGCTAAGTAGGCATG-1	E14.5	12664	3360	2.75584	10142	3355	-0.149772	0.461038	G2M	E14.5	0	0
CAGCTAAGTCTCTTAT-1	E14.5	16454	4148	2.53434	10343	3958	-0.136756	-0.238018	G1	E14.5	4	4
CAGCTAAGTTAAGATG-1	E14.5	5302	2127	2.98001	8357	2159	-0.0286142	0.0778317	G2M	E14.5	4	4
CAGCTAATCATGCTCC-1	E14.5	13440	3761	2.63393	10339	3749	0.0409926	0.329633	G2M	E14.5	0	0
CAGCTAATCCCAAGTA-1	E14.5	11616	3255	3.02169	10041	3255	-0.18654	-0.326509	G1	E14.5	0	0
CAGCTAATCTGTCCGT-1	E14.5	8659	2300	2.47142	9083	2298	0.00397933	-0.200716	S	E14.5	12	12
CAGCTGGCAACGCACC-1	E14.5	7969	2546	3.42577	8832	2546	-0.0477728	-0.253846	G1	E14.5	1	1
CAGCTGGCACCAGTTA-1	E14.5	7376	2338	4.32484	8732	2338	-0.0844987	0.242599	G2M	E14.5	14	14
CAGCTGGCAGTGACAG-1	E14.5	5957	2077	2.78664	8569	2084	-0.091853	0.47141	G2M	E14.5	0	0
CAGCTGGCATCATCCC-1	E14.5	10711	3005	2.56745	9856	3005	-0.0039494	-0.231578	G1	E14.5	0	0
CAGCTGGCATCCTAGA-1	E14.5	7209	2279	2.27493	8708	2280	-0.0135543	-0.280297	G1	E14.5	1	1
CAGCTGGCATGCCTAA-1	E14.5	20919	3468	1.99818	9994	2579	-0.064999	-0.202275	G1	E14.5	13	13
CAGCTGGGTAAATGAC-1	E14.5	6106	2049	2.47298	8604	2060	-0.122975	-0.176117	G1	E14.5	0	0
CAGCTGGTCATTGCCC-1	E14.5	8485	2933	3.26458	8948	2933	0.170456	0.0239965	S	E14.5	1	1
CAGCTGGTCCACGACG-1	E14.5	13670	2702	2.55304	10047	2665	0.179293	-0.144425	S	E14.5	13	13
CAGCTGGTCGGCGCAT-1	E14.5	5917	2209	2.83928	8531	2215	0.0084464	-0.237628	S	E14.5	1	1
CAGCTGGTCTGAGGGA-1	E14.5	7240	2332	3.09392	8710	2333	-0.184663	-0.266447	G1	E14.5	1	1
CAGCTGGTCTTATCTG-1	E14.5	6749	2271	3.7487	8643	2275	-0.035503	-0.168316	G1	E14.5	10	10
CAGGTGCAGAGCTTCT-1	E14.5	10711	2961	3.49174	9849	2959	-0.159216	0.478155	G2M	E14.5	5	5
CAGGTGCAGGGCTTGA-1	E14.5	10668	2619	3.009	9790	2616	0.100417	-0.108329	S	E14.5	16	16
CAGGTGCCAATAACGA-1	E14.5	11907	2854	2.83027	10004	2851	0.153019	-0.0840273	S	E14.5	2	2
CAGGTGCGTCAGTGGA-1	E14.5	15776	3837	3.21374	10275	3728	-0.135302	0.672445	G2M	E14.5	4	4
CAGGTGCGTCGGGTCT-1	E14.5	10599	2789	3.21728	9796	2788	-0.115324	0.358208	G2M	E14.5	3	3
CAGGTGCGTCTGGAGA-1	E14.5	10180	2606	3.31041	9674	2606	0.172151	0.339947	G2M	E14.5	2	2
CAGGTGCTCAGTCAGT-1	E14.5	9741	2960	2.40222	9560	2959	0.120764	-0.132397	S	E14.5	1	1
CAGGTGCTCCGCATCT-1	E14.5	23435	4724	2.5176	10132	3387	0.014728	-0.125905	S	E14.5	0	0
CAGTAACAGAATGTTG-1	E14.5	7312	2589	3.33698	8669	2589	0.356811	0.00376407	S	E14.5	5	5
CAGTAACAGACCTTTG-1	E14.5	7234	2293	2.47443	8724	2293	0.22354	-0.00835485	S	E14.5	1	1
CAGTAACAGCAATATG-1	E14.5	25356	4740	2.83562	9816	2934	0.083956	0.127061	G2M	E14.5	7	7
CAGTAACAGCGAAGGG-1	E14.5	12039	3240	3.04843	10072	3239	0.182072	-0.101415	S	E14.5	6	6
CAGTAACAGGAGTAGA-1	E14.5	14248	3435	4.3164	10207	3383	-0.184356	-0.12114	G1	E14.5	11	11
CAGTAACCAAGCGAGT-1	E14.5	5511	2008	3.4658	8508	2028	0.076269	-0.216972	S	E14.5	0	0
CAGTAACCACTGCCAG-1	E14.5	5949	2117	2.42057	8572	2128	0.111074	-0.0157771	S	E14.5	6	6
CAGTAACGTATCGCAT-1	E14.5	5522	2074	3.62188	8481	2094	-0.0531726	0.207144	G2M	E14.5	5	5
CAGTAACGTCGGCATC-1	E14.5	7007	2135	3.73912	8730	2136	-0.0523038	-0.263978	G1	E14.5	0	0
CAGTAACGTTAGAACA-1	E14.5	6803	2330	3.24857	8597	2328	-0.0970673	0.214281	G2M	E14.5	3	3
CAGTAACGTTCCACTC-1	E14.5	6014	2236	2.36116	8546	2246	-0.156834	-0.171964	G1	E14.5	7	7
CAGTAACTCATCTGCC-1	E14.5	5726	2064	2.72441	8525	2072	-0.0194559	0.0910182	G2M	E14.5	6	6
CAGTAACTCGGATGTT-1	E14.5	16959	3424	3.7915	10238	3115	-0.145428	-0.310369	G1	E14.5	14	14
CAGTAACTCTTATCTG-1	E14.5	7869	2279	3.3041	8864	2279	0.00474798	-0.225104	S	E14.5	3	3
CAGTAACTCTTTACAC-1	E14.5	9148	2647	2.95146	9254	2647	-0.0984454	-0.263786	G1	E14.5	4	4
CAGTCCTAGAGGTTAT-1	E14.5	6754	2283	3.03524	8652	2285	-0.152636	-0.272605	G1	E14.5	4	4
CAGTCCTAGCAGATCG-1	E14.5	7756	2264	2.95255	8822	2264	-0.0112559	-0.0710597	G1	E14.5	3	3
CAGTCCTAGTCGCCGT-1	E14.5	7875	2133	3.08571	8873	2133	-0.194793	-0.283322	G1	E14.5	12	12
CAGTCCTAGTGAACAT-1	E14.5	6524	2249	2.6824	8619	2250	-0.0501192	-0.273944	G1	E14.5	1	1
CAGTCCTCAACGATGG-1	E14.5	9867	3035	2.36141	9629	3035	-0.0723812	-0.3173	G1	E14.5	0	0
CAGTCCTGTAGCGTGA-1	E14.5	7900	2593	3.25316	8797	2593	-0.0626406	0.463005	G2M	E14.5	7	7
CAGTCCTGTTGTGGAG-1	E14.5	12513	3200	3.00487	10114	3196	-0.111262	0.282867	G2M	E14.5	1	1
CAGTCCTTCCATGAGT-1	E14.5	8665	2367	4.13156	9083	2366	0.106377	0.13454	G2M	E14.5	2	2
CAGTCCTTCCGAATGT-1	E14.5	5813	2053	2.71805	8550	2073	-0.18369	-0.202434	G1	E14.5	10	10
CAGTCCTTCTTAGCCC-1	E14.5	9467	2706	2.72526	9429	2706	0.22031	0.225906	G2M	E14.5	0	0
CATATGGAGATCCCGC-1	E14.5	12151	3413	2.50185	10108	3410	0.167221	-0.232655	S	E14.5	1	1
CATATGGAGATGTGGC-1	E14.5	7910	2611	2.52845	8815	2611	-0.028979	-0.276234	G1	E14.5	1	1
CATATGGAGCTCTCGG-1	E14.5	6618	2173	4.06467	8631	2178	0.10113	0.00842453	S	E14.5	10	10
CATATGGCACACATGT-1	E14.5	7247	2312	2.85635	8711	2311	-0.0048701	-0.103217	G1	E14.5	0	0
CATATGGCACATCTTT-1	E14.5	14828	3304	2.54249	10123	3225	0.186605	0.151087	S	E14.5	0	0
CATATGGCAGTATAAG-1	E14.5	6861	2356	2.20085	8605	2357	-0.0615189	-0.251822	G1	E14.5	1	1
CATATGGCAGTCGATT-1	E14.5	13438	3470	2.11341	10245	3457	0.144357	0.306089	G2M	E14.5	6	6
CATATGGCATTGGCGC-1	E14.5	8186	2482	2.96848	8907	2481	0.173267	0.0277322	S	E14.5	4	4
CATATGGTCTACTATC-1	E14.5	26555	5349	2.3875	9794	3261	-0.220724	-0.320467	G1	E14.5	4	4
CATATTCAGCTTCGCG-1	E14.5	29262	5268	2.51179	9466	2756	0.0192927	0.0858173	G2M	E14.5	5	5
CATATTCAGGCAATTA-1	E14.5	11005	2985	2.26261	9912	2985	-0.119915	0.384013	G2M	E14.5	4	4
CATATTCAGGGTTCCC-1	E14.5	7243	2254	2.73367	8717	2254	0.272125	-0.185938	S	E14.5	4	4
CATATTCAGTGGCACA-1	E14.5	6372	2347	2.49529	8547	2352	-0.149124	0.779641	G2M	E14.5	0	0
CATATTCCACCGATAT-1	E14.5	6184	2204	2.8784	8605	2204	-0.062401	-0.207938	G1	E14.5	1	1
CATATTCGTAATCGTC-1	E14.5	6525	2081	3.20307	8657	2085	0.161255	-0.0492948	S	E14.5	3	3
CATATTCGTACCGTAT-1	E14.5	11275	3161	2.43016	9995	3161	0.100809	-0.205938	S	E14.5	9	9
CATATTCGTGGTAACG-1	E14.5	9506	2856	2.84031	9446	2854	-0.104448	-0.294059	G1	E14.5	9	9
CATATTCGTTTGCATG-1	E14.5	10350	2876	2.84058	9767	2876	0.0354352	0.303806	G2M	E14.5	5	5
CATATTCTCATACGGT-1	E14.5	11529	2415	1.56995	9874	2414	0.113116	-0.153066	S	E14.5	13	13
CATATTCTCATGTCCC-1	E14.5	7599	2196	3.07935	8813	2196	0.196174	0.0438074	S	E14.5	3	3
CATATTCTCCTTTCTC-1	E14.5	8001	2702	3.31209	8781	2702	-0.0520144	0.663691	G2M	E14.5	10	10
CATATTCTCGCGTAGC-1	E14.5	6179	2062	3.57663	8649	2068	-0.175739	0.347698	G2M	E14.5	4	4
CATCAAGAGAGAGCTC-1	E14.5	5732	2010	4.83252	8540	2026	-0.209272	-0.1916	G1	E14.5	0	0
CATCAAGAGATCTGAA-1	E14.5	9551	2559	3.48655	9452	2557	-0.120389	-0.314184	G1	E14.5	4	4
CATCAAGAGCCAACAG-1	E14.5	19731	4204	3.40581	10387	3606	-0.150136	-0.336976	G1	E14.5	4	4
CATCAAGAGGACCACA-1	E14.5	7885	2074	3.04375	8905	2074	-0.176504	-0.149539	G1	E14.5	2	2
CATCAAGAGGAGTACC-1	E14.5	23880	4790	2.68844	10029	3267	-0.112385	-0.314664	G1	E14.5	0	0
CATCAAGCAATAGAGT-1	E14.5	9165	2727	2.58592	9256	2727	-0.206948	-0.280367	G1	E14.5	4	4
CATCAAGCAATGAAAC-1	E14.5	14222	3544	1.61721	10284	3498	0.0866887	0.382741	G2M	E14.5	3	3
CATCAAGCACGAAATA-1	E14.5	9270	2760	3.74326	9287	2760	-0.0704207	-0.280641	G1	E14.5	0	0
CATCAAGCAGGAATCG-1	E14.5	15813	3453	2.10586	10179	3320	0.0212255	0.187083	G2M	E14.5	2	2
CATCAAGGTACTCAAC-1	E14.5	14083	3675	3.16694	10281	3626	-0.103785	-0.269558	G1	E14.5	0	0
CATCAAGGTCCAACTA-1	E14.5	6523	2126	2.34555	8619	2124	-0.0735505	-0.282925	G1	E14.5	6	6
CATCAAGGTTCCAACA-1	E14.5	9406	2567	2.92367	9402	2567	0.425778	-0.0937587	S	E14.5	3	3
CATCAAGTCCCAACGG-1	E14.5	21416	4174	1.97983	10394	3335	0.219152	-0.0418364	S	E14.5	15	15
CATCAAGTCGGCGCAT-1	E14.5	24917	4435	3.05013	9934	2825	-0.0627481	-0.138533	G1	E14.5	2	2
CATCAAGTCTACTATC-1	E14.5	8264	2506	2.12972	8943	2506	-0.0386506	0.294262	G2M	E14.5	5	5
CATCAGAAGACTAAGT-1	E14.5	5342	2002	3.46312	8481	2033	0.125646	-0.154285	S	E14.5	4	4
CATCAGAAGCCATCGC-1	E14.5	6679	2282	3.57838	8602	2288	-0.0837744	0.277484	G2M	E14.5	14	14
CATCAGAAGCCCGAAA-1	E14.5	8418	2490	2.3521	8983	2490	0.1272	0.234256	G2M	E14.5	4	4
CATCAGAAGCTTATCG-1	E14.5	7595	2456	2.31731	8750	2454	-0.102384	0.549979	G2M	E14.5	4	4
CATCAGAAGTAGCGGT-1	E14.5	10399	3137	4.20233	9797	3134	0.0378257	-0.136164	S	E14.5	14	14
CATCAGACACACAGAG-1	E14.5	7040	2411	3.48011	8646	2411	0.221339	-0.165721	S	E14.5	0	0
CATCAGACACCACGTG-1	E14.5	12671	3339	3.01476	10145	3330	-0.168384	-0.356983	G1	E14.5	4	4
CATCAGAGTAAAGGAG-1	E14.5	8393	2333	2.46634	8970	2332	-0.15123	0.279661	G2M	E14.5	8	8
CATCAGAGTGAACCTT-1	E14.5	7774	2604	3.04862	8775	2603	-0.110502	-0.265629	G1	E14.5	0	0
CATCAGAGTTCGTGAT-1	E14.5	17822	4143	2.50252	10449	3839	-0.0765641	0.568233	G2M	E14.5	0	0
CATCAGATCACCAGGC-1	E14.5	15050	3270	2.55814	10128	3157	-0.104978	0.309799	G2M	E14.5	2	2
CATCAGATCCGCGCAA-1	E14.5	8231	2493	3.31673	8909	2493	0.384039	-0.179283	S	E14.5	3	3
CATCAGATCTCAAGTG-1	E14.5	6913	2242	3.11008	8656	2243	-0.0746297	-0.161638	G1	E14.5	4	4
CATCAGATCTCTGAGA-1	E14.5	11044	2987	2.68924	9919	2985	0.115456	-0.183213	S	E14.5	0	0
CATCAGATCTTAGCCC-1	E14.5	8415	2505	4.67023	8973	2505	0.0971306	-0.0468986	S	E14.5	8	8
CATCCACAGGTGCAAC-1	E14.5	7465	2377	3.57669	8743	2376	-0.040208	-0.247164	G1	E14.5	1	1
CATCCACAGTCTTGCA-1	E14.5	6026	2018	4.31464	8621	2028	-0.12163	-0.230641	G1	E14.5	0	0
CATCCACAGTGACATA-1	E14.5	6983	2085	2.99298	8714	2084	-0.159194	-0.145234	G1	E14.5	1	1
CATCCACAGTTTAGGA-1	E14.5	9790	2765	3.03371	9560	2765	0.00459883	-0.0975428	S	E14.5	0	0
CATCCACCAAGCGCTC-1	E14.5	9240	2866	3.34416	9269	2866	0.202345	-0.151257	S	E14.5	1	1
CATCCACCACTGAAGG-1	E14.5	15423	3662	2.61298	10159	3559	-0.0552917	-0.146189	G1	E14.5	15	15
CATCCACCATCTACGA-1	E14.5	5854	2056	3.0919	8532	2066	-0.184264	-0.24052	G1	E14.5	1	1
CATCCACGTCACAAGG-1	E14.5	5643	2253	3.40245	8410	2268	0.0979759	0.142907	G2M	E14.5	0	0
CATCCACTCAACCATG-1	E14.5	6937	2135	3.20023	8713	2136	-0.162167	-0.26867	G1	E14.5	4	4
CATCCACTCTTGTCAT-1	E14.5	9019	2513	2.42821	9191	2512	-0.060773	-0.27833	G1	E14.5	0	0
CATCGAAAGACCTAGG-1	E14.5	9925	2410	3.44584	9592	2410	-0.143628	-0.251404	G1	E14.5	2	2
CATCGAAAGAGAGCTC-1	E14.5	12199	3389	2.22969	10132	3387	-0.101233	0.217653	G2M	E14.5	1	1
CATCGAAAGCGTAGTG-1	E14.5	20654	4563	2.28043	10375	3772	-0.0126557	-0.198691	G1	E14.5	3	3
CATCGAAAGGCCCTCA-1	E14.5	20344	4469	2.72808	10641	3826	0.16516	0.497036	G2M	E14.5	11	11
CATCGAAAGTACGATA-1	E14.5	16002	3805	3.24959	10258	3663	0.0396949	-0.0611676	S	E14.5	2	2
CATCGAACACGAAAGC-1	E14.5	8033	2537	3.51052	8852	2535	-0.122501	-0.273114	G1	E14.5	1	1
CATCGAACAGTTCATG-1	E14.5	6219	2189	3.92346	8607	2194	-0.0246198	-0.263368	G1	E14.5	1	1
CATCGAAGTAAGGGAA-1	E14.5	12002	3568	2.27462	10197	3566	-0.16587	-0.381316	G1	E14.5	1	1
CATCGAAGTCGGGTCT-1	E14.5	7085	2334	2.97812	8695	2333	-0.154446	-0.139149	G1	E14.5	0	0
CATCGAATCCCTAATT-1	E14.5	6332	2252	2.77953	8589	2254	-0.0726644	-0.248862	G1	E14.5	10	10
CATCGAATCGACGGAA-1	E14.5	7721	2505	2.49968	8781	2505	-0.176967	-0.252167	G1	E14.5	1	1
CATCGGGAGACCTAGG-1	E14.5	6919	2233	3.13629	8687	2234	0.314628	-0.0956154	S	E14.5	6	6
CATCGGGAGATCACGG-1	E14.5	6040	2155	3.2947	8580	2162	-0.142685	-0.235996	G1	E14.5	0	0
CATCGGGAGATGTAAC-1	E14.5	8968	2884	3.07761	9146	2884	-0.0735885	-0.274537	G1	E14.5	9	9
CATCGGGAGCGATTCT-1	E14.5	7774	2149	3.22871	8859	2148	-0.0976574	-0.0913551	G1	E14.5	3	3
CATCGGGCAATAAGCA-1	E14.5	19431	4095	3.2268	10366	3533	0.0512762	0.269331	G2M	E14.5	0	0
CATCGGGCACCGCTAG-1	E14.5	8682	2633	4.52661	9037	2631	-0.114528	-0.297118	G1	E14.5	10	10
CATCGGGCAGACACTT-1	E14.5	11867	3208	2.40162	10064	3208	0.0247516	-0.309869	S	E14.5	1	1
CATCGGGCATCGTCGG-1	E14.5	7626	2255	3.27826	8823	2255	0.217938	-0.173282	S	E14.5	0	0
CATCGGGCATTGTGCA-1	E14.5	6681	2367	2.57446	8596	2368	0.274177	-0.14265	S	E14.5	0	0
CATCGGGGTAGTGAAT-1	E14.5	9841	2737	3.07896	9577	2737	-0.116499	0.414586	G2M	E14.5	0	0
CATCGGGGTCCTAGCG-1	E14.5	9468	2493	3.23194	9414	2493	0.0877072	-0.230367	S	E14.5	7	7
CATCGGGGTGACGCCT-1	E14.5	16816	3823	2.47978	10317	3613	0.0847564	-0.137348	S	E14.5	3	3
CATCGGGGTTAGGGTG-1	E14.5	9403	2916	3.22238	9402	2916	0.445344	0.125039	S	E14.5	0	0
CATCGGGGTTTAGGAA-1	E14.5	6572	2092	4.12355	8646	2096	-0.0859869	-0.226292	G1	E14.5	7	7
CATCGGGTCCGTAGGC-1	E14.5	10569	2874	3.03718	9801	2873	-0.186832	-0.243619	G1	E14.5	0	0
CATGACAAGCAGCCTC-1	E14.5	9425	2486	2.69496	9417	2486	-0.116799	-0.110283	G1	E14.5	2	2
CATGACAAGCGTGAGT-1	E14.5	6276	2178	2.07138	8608	2183	0.211352	-0.156498	S	E14.5	9	9
CATGACAAGGCATGGT-1	E14.5	13245	3112	3.07286	10118	3102	0.19402	-0.19056	S	E14.5	2	2
CATGACAAGGCTAGCA-1	E14.5	7454	2132	3.44781	8798	2132	-0.0635829	-0.143156	G1	E14.5	3	3
CATGACAAGTCCAGGA-1	E14.5	7310	2384	2.32558	8700	2384	-0.0494163	0.352353	G2M	E14.5	0	0
CATGACACAAGGACAC-1	E14.5	20245	2868	1.58558	9954	2096	-0.0804057	0.29297	G2M	E14.5	13	13
CATGACACATGCCTTC-1	E14.5	12096	3251	2.91832	10100	3247	0.00551743	-0.281207	S	E14.5	0	0
CATGACAGTAGCACGA-1	E14.5	9110	2757	2.84303	9227	2757	-0.146461	-0.263363	G1	E14.5	0	0
CATGACAGTCTAACGT-1	E14.5	8214	2645	2.94619	8881	2645	-0.0417007	0.335789	G2M	E14.5	0	0
CATGACAGTCTCTTAT-1	E14.5	11786	3355	2.7066	10079	3355	0.0562058	0.214315	G2M	E14.5	5	5
CATGACAGTGATGCCC-1	E14.5	10514	3022	2.86285	9807	3020	-0.107462	-0.232848	G1	E14.5	1	1
CATGACATCTCCTATA-1	E14.5	8467	2693	2.65738	8953	2692	0.0793705	-0.206767	S	E14.5	4	4
CATGCCTAGGATGCGT-1	E14.5	8078	2366	4.02327	8899	2366	-0.157215	-0.218112	G1	E14.5	4	4
CATGCCTCAAGCCATT-1	E14.5	18781	3827	2.94447	10348	3391	0.0422665	0.109643	G2M	E14.5	2	2
CATGCCTCACAGACTT-1	E14.5	9220	2345	2.21258	9298	2345	-0.15757	-0.172911	G1	E14.5	2	2
CATGCCTGTACACCGC-1	E14.5	11983	3291	2.83735	10094	3288	-0.122854	-0.343843	G1	E14.5	4	4
CATGCCTGTCTAACGT-1	E14.5	7410	2112	2.37517	8816	2112	-0.0502317	-0.276534	G1	E14.5	0	0
CATGCCTGTGAAATCA-1	E14.5	8755	2446	3.52941	9103	2446	0.0361125	0.132335	G2M	E14.5	0	0
CATGCCTGTGACGGTA-1	E14.5	6158	2036	2.95551	8647	2040	-0.0182009	-0.242062	G1	E14.5	0	0
CATGCCTGTTAAAGTG-1	E14.5	7936	2575	3.062	8821	2575	-0.19691	-0.325131	G1	E14.5	1	1
CATGCCTTCTAACTTC-1	E14.5	10966	3162	3.50173	9959	3161	0.13913	0.516965	G2M	E14.5	5	5
CATGCCTTCTATCCTA-1	E14.5	10992	3081	2.65648	9932	3079	-0.237574	-0.312982	G1	E14.5	0	0
CATGGCGAGAGGTAGA-1	E14.5	18608	4462	3.2083	10514	4028	-0.178296	-0.280051	G1	E14.5	8	8
CATGGCGAGCAGGTCA-1	E14.5	7153	2372	3.67678	8710	2371	0.157839	0.258066	G2M	E14.5	0	0
CATGGCGAGCCCAATT-1	E14.5	14233	3763	3.23193	10293	3703	-0.0565964	0.208938	G2M	E14.5	1	1
CATGGCGAGCTCCTCT-1	E14.5	13367	3052	2.90267	10123	3021	0.217954	-0.188735	S	E14.5	16	16
CATGGCGAGTCGTTTG-1	E14.5	10050	2682	3.47264	9651	2682	-0.151893	0.161062	G2M	E14.5	2	2
CATGGCGAGTGAATTG-1	E14.5	9618	2409	2.50572	9485	2409	0.0415555	-0.16348	S	E14.5	16	16
CATGGCGCACGAAACG-1	E14.5	7914	2495	3.26005	8811	2495	-0.0202603	0.340907	G2M	E14.5	4	4
CATGGCGGTACCGAGA-1	E14.5	9486	2770	2.96226	9423	2769	-0.150132	-0.315169	G1	E14.5	14	14
CATGGCGGTCGAAAGC-1	E14.5	8592	2428	3.39851	9036	2428	-0.184177	-0.246994	G1	E14.5	4	4
CATGGCGTCAACGAAA-1	E14.5	10117	2493	3.31126	9646	2491	-0.162733	-0.154134	G1	E14.5	8	8
CATGGCGTCAACGGCC-1	E14.5	7105	2415	3.4342	8676	2414	0.249448	-0.0389749	S	E14.5	10	10
CATGGCGTCATTGCGA-1	E14.5	8194	2230	3.71003	8954	2229	0.153072	0.00709023	S	E14.5	3	3
CATGGCGTCCCAAGAT-1	E14.5	7854	2752	3.5396	8764	2752	-0.0150567	0.0500521	G2M	E14.5	1	1
CATGGCGTCCTTTCGG-1	E14.5	19724	4493	2.35246	10476	3896	-0.212857	0.346032	G2M	E14.5	0	0
CATTATCAGAGTGAGA-1	E14.5	7279	2264	3.86042	8743	2264	-0.0985339	0.296251	G2M	E14.5	4	4
CATTATCAGTAGATGT-1	E14.5	10360	2930	2.47104	9769	2930	-0.0178328	0.274168	G2M	E14.5	4	4
CATTATCCAACTGCTA-1	E14.5	16128	2170	1.36409	9941	1871	-0.00542842	-0.0650492	G1	E14.5	13	13
CATTATCCAATCTACG-1	E14.5	15177	3780	1.87784	10236	3698	-0.0897987	0.660883	G2M	E14.5	4	4
CATTATCCACGCCAGT-1	E14.5	28788	5084	2.55662	9453	2575	0.115104	-0.290352	S	E14.5	8	8
CATTATCCACGGATAG-1	E14.5	6319	2259	2.12059	8601	2264	-0.237066	-0.252378	G1	E14.5	1	1
CATTATCCATTTGCCC-1	E14.5	27123	5619	2.82048	9679	3257	-0.0888154	-0.153992	G1	E14.5	1	1
CATTATCGTCCGAAGA-1	E14.5	7835	2406	2.29738	8823	2405	-0.0964269	0.569598	G2M	E14.5	6	6
CATTATCGTGCCTGCA-1	E14.5	27371	5103	2.63783	9609	2869	-0.0969656	0.379713	G2M	E14.5	2	2
CATTATCTCAACACTG-1	E14.5	9849	2550	2.12204	9571	2550	-0.0232948	0.0640881	G2M	E14.5	2	2
CATTATCTCCCTCAGT-1	E14.5	6736	2314	3.14727	8604	2316	0.163024	-0.109972	S	E14.5	8	8
CATTATCTCCTCAACC-1	E14.5	6644	2221	2.99518	8635	2223	-0.0445307	-0.0593876	G1	E14.5	3	3
CATTATCTCGAGCCCA-1	E14.5	9419	2858	4.42722	9412	2858	0.191641	-0.11009	S	E14.5	5	5
CATTATCTCTTGAGGT-1	E14.5	11594	2941	2.9153	9979	2940	-0.175046	-0.305377	G1	E14.5	2	2
CATTCGCAGCCAGTAG-1	E14.5	9609	2708	3.86096	9488	2707	0.115042	0.112473	S	E14.5	3	3
CATTCGCAGGCGACAT-1	E14.5	14260	3558	2.76297	10222	3503	-0.233988	-0.276803	G1	E14.5	0	0
CATTCGCCATACTACG-1	E14.5	9516	2544	3.73056	9437	2544	-0.0331905	0.353285	G2M	E14.5	3	3
CATTCGCCATCACCCT-1	E14.5	9169	2618	3.6209	9252	2617	0.0883034	-0.038935	S	E14.5	3	3
CATTCGCCATGTAGTC-1	E14.5	12466	2833	2.52687	10026	2827	0.15828	-0.204747	S	E14.5	2	2
CATTCGCGTGCCTGGT-1	E14.5	9485	2797	3.34212	9427	2796	0.11934	0.226727	G2M	E14.5	4	4
CATTCGCTCCGAGCCA-1	E14.5	8804	2209	1.73785	9145	2209	-0.063214	-0.191509	G1	E14.5	13	13
CATTCGCTCCTTTCTC-1	E14.5	21600	4227	2.89352	10294	3356	0.307343	-0.00984485	S	E14.5	7	7
CATTCGCTCGGAGGTA-1	E14.5	9204	2352	3.3681	9282	2351	0.0239024	0.00195527	S	E14.5	8	8
CATTCGCTCTATCCCG-1	E14.5	8466	2273	2.85849	9022	2273	-0.11822	-0.233937	G1	E14.5	0	0
CCAATCCAGACTAAGT-1	E14.5	8378	2523	1.82621	8949	2523	-0.0333586	0.473634	G2M	E14.5	4	4
CCAATCCAGTATCGAA-1	E14.5	16336	3866	3.74021	10318	3712	0.0392512	-0.174156	S	E14.5	4	4
CCAATCCCAAGACGTG-1	E14.5	8941	2555	3.00861	9157	2553	0.00490378	-0.329976	S	E14.5	1	1
CCAATCCCACCCATGG-1	E14.5	15730	3901	3.17228	10278	3778	0.100281	-0.128473	S	E14.5	3	3
CCAATCCCACTAGTAC-1	E14.5	24521	4558	2.43873	10053	3035	0.238518	-0.088241	S	E14.5	7	7
CCAATCCCATCCGTGG-1	E14.5	8746	2457	2.25246	9098	2457	0.274855	-0.0255417	S	E14.5	6	6
CCAATCCCATGGTAGG-1	E14.5	6515	2198	3.42287	8604	2198	-0.164233	-0.0446796	G1	E14.5	15	15
CCAATCCGTAAATGTG-1	E14.5	11866	3282	2.34283	10059	3280	0.166698	0.426204	G2M	E14.5	5	5
CCAATCCGTCCTAGCG-1	E14.5	6467	2219	2.72151	8581	2222	-0.142708	-0.214759	G1	E14.5	1	1
CCAATCCGTTCCCTTG-1	E14.5	16325	3982	2.78714	10299	3802	0.00813203	-0.30904	S	E14.5	10	10
CCAATCCTCAGCTGGC-1	E14.5	6105	2321	2.58804	8554	2339	-0.212449	-0.281378	G1	E14.5	1	1
CCAATCCTCGGGAGTA-1	E14.5	21153	4387	3.28559	10341	3513	-0.21208	-0.0155508	G1	E14.5	8	8
CCAATCCTCTAGCACA-1	E14.5	10126	2870	3.37744	9679	2870	-0.105104	-0.269572	G1	E14.5	3	3
CCAATCCTCTGGCGTG-1	E14.5	26631	5347	3.05283	9721	3156	0.0464451	-0.258811	S	E14.5	12	12
CCACCTAAGAAACCGC-1	E14.5	7467	2140	3.06683	8784	2139	-0.0893342	-0.182666	G1	E14.5	16	16
CCACCTAAGCGATAGC-1	E14.5	22256	4858	3.21711	10386	3791	-0.243177	-0.0964208	G1	E14.5	11	11
CCACCTAAGTTTAGGA-1	E14.5	22672	4971	2.36415	10424	3846	-0.0475659	0.657673	G2M	E14.5	4	4
CCACCTACAAGCCCAC-1	E14.5	21357	4553	2.4348	10410	3673	-0.124965	0.190584	G2M	E14.5	8	8
CCACCTACAAGGTGTG-1	E14.5	15961	3689	3.3018	10215	3505	0.136993	0.00625559	S	E14.5	11	11
CCACCTACACGGTTTA-1	E14.5	6344	2183	3.13682	8626	2186	-0.0716789	-0.207654	G1	E14.5	1	1
CCACCTACAGACAAGC-1	E14.5	7092	2084	2.91878	8746	2084	-0.140479	-0.124345	G1	E14.5	4	4
CCACCTACAGTATAAG-1	E14.5	15703	3884	2.49634	10291	3773	0.00135548	-0.351009	S	E14.5	14	14
CCACCTACAGTGGGAT-1	E14.5	11274	2939	2.49246	9922	2938	-0.0141645	0.128662	G2M	E14.5	2	2
CCACCTAGTTACTGAC-1	E14.5	12492	3182	3.06596	10108	3175	-0.00359841	0.269147	G2M	E14.5	1	1
CCACCTAGTTGTTTGG-1	E14.5	9968	3095	3.47111	9660	3095	0.0183394	-0.00271292	S	E14.5	1	1
CCACCTATCGACCAGC-1	E14.5	15108	3267	2.8197	10127	3119	-0.21644	-0.300254	G1	E14.5	14	14
CCACCTATCGCAAGCC-1	E14.5	9958	2708	3.22354	9611	2708	0.0703826	0.074408	G2M	E14.5	3	3
CCACCTATCTAACCGA-1	E14.5	6825	2347	2.91575	8616	2347	0.0802899	-0.23558	S	E14.5	0	0
CCACCTATCTCCCTGA-1	E14.5	7094	2248	3.10121	8714	2248	-0.0947839	-0.210282	G1	E14.5	1	1
CCACGGAAGAGTACCG-1	E14.5	7063	2325	3.62452	8669	2324	-0.144202	-0.265114	G1	E14.5	14	14
CCACGGAAGGTGGGTT-1	E14.5	13697	3431	2.44579	10219	3410	0.130733	-0.166445	S	E14.5	1	1
CCACGGAAGTTAGGTA-1	E14.5	8594	2226	3.40936	9057	2225	-0.160872	-0.239104	G1	E14.5	2	2
CCACGGAAGTTGTCGT-1	E14.5	9878	2525	3.06742	9580	2525	-0.0203236	0.0147753	G2M	E14.5	2	2
CCACGGACAATGGATA-1	E14.5	7227	2351	3.44541	8716	2351	-0.176011	-0.25581	G1	E14.5	9	9
CCACGGACACAGTCGC-1	E14.5	7383	2176	3.22362	8769	2175	-0.0453952	-0.178789	G1	E14.5	3	3
CCACGGACACCGATAT-1	E14.5	7811	2491	3.44386	8798	2489	0.108943	-0.214932	S	E14.5	0	0
CCACGGACAGGTCTCG-1	E14.5	10703	3055	2.95244	9858	3055	-0.0524038	-0.143874	G1	E14.5	0	0
CCACGGACAGTCAGCC-1	E14.5	12618	2998	3.50293	10073	2981	0.180762	-0.114697	S	E14.5	8	8
CCACGGACATCCCATC-1	E14.5	6641	2053	3.01159	8675	2055	-0.0910924	-0.187001	G1	E14.5	3	3
CCACGGACATGAAGTA-1	E14.5	12666	3424	3.47387	10162	3418	0.120088	0.0793542	S	E14.5	5	5
CCACGGAGTAGCGTAG-1	E14.5	12747	3508	3.63223	10192	3495	-0.216698	-0.27302	G1	E14.5	5	5
CCACGGAGTCATGCCG-1	E14.5	7214	2520	2.27336	8643	2519	0.255042	-0.0900697	S	E14.5	1	1
CCACGGAGTCGCGTGT-1	E14.5	9303	2828	3.74073	9302	2826	0.129175	0.0506342	S	E14.5	3	3
CCACGGAGTGCGGTAA-1	E14.5	7668	2484	3.22118	8756	2484	0.309774	-0.0642422	S	E14.5	10	10
CCACGGAGTTCATGGT-1	E14.5	13807	3431	2.32491	10234	3390	-0.129745	0.661737	G2M	E14.5	5	5
CCACGGAGTTGTTTGG-1	E14.5	7697	2079	2.7803	8861	2079	-0.111151	-0.252523	G1	E14.5	2	2
CCACGGATCATATCGG-1	E14.5	5220	2259	4.7318	8342	2289	0.441723	0.0431408	S	E14.5	0	0
CCACGGATCCAGATCA-1	E14.5	12484	3344	3.00384	10134	3340	-0.071405	-0.245536	G1	E14.5	5	5
CCACGGATCTTCGGTC-1	E14.5	6396	2217	2.29831	8619	2219	-0.162876	-0.190955	G1	E14.5	0	0
CCACTACAGACAAAGG-1	E14.5	14516	3518	2.89336	10198	3446	-0.142803	-0.223282	G1	E14.5	8	8
CCACTACAGACTTGAA-1	E14.5	9067	2666	3.97044	9198	2665	0.297353	-0.0162245	S	E14.5	18	18
CCACTACAGCACAGGT-1	E14.5	5709	2242	2.85514	8435	2261	-0.217726	-0.238321	G1	E14.5	1	1
CCACTACCACATTAGC-1	E14.5	13403	3101	3.1187	10141	3080	-0.000422928	0.160658	G2M	E14.5	2	2
CCACTACCACTATCTT-1	E14.5	6721	2417	3.12454	8572	2419	-0.103625	-0.230809	G1	E14.5	1	1
CCACTACCACTCTGTC-1	E14.5	9074	2357	2.82125	9213	2356	-0.143236	-0.204861	G1	E14.5	2	2
CCACTACCATACGCTA-1	E14.5	9469	2743	2.91477	9429	2742	-0.0991683	-0.185408	G1	E14.5	5	5
CCACTACCATGTCGAT-1	E14.5	8979	2910	2.62836	9143	2909	0.00654162	0.0211193	G2M	E14.5	0	0
CCACTACGTAAGGATT-1	E14.5	5934	2090	3.53893	8578	2103	-0.170746	-0.22182	G1	E14.5	9	9
CCACTACGTAGCTGCC-1	E14.5	13260	3083	3.19759	10126	3064	0.219077	-0.0466111	S	E14.5	2	2
CCACTACGTCTGCCAG-1	E14.5	9123	2480	4.11049	9240	2479	0.0188544	0.123188	G2M	E14.5	3	3
CCACTACGTTATGTGC-1	E14.5	12544	3078	2.77423	10089	3076	-0.116669	0.167327	G2M	E14.5	0	0
CCACTACGTTCCACAA-1	E14.5	13760	3494	2.36919	10229	3459	0.187818	0.139863	S	E14.5	14	14
CCACTACTCAGTCAGT-1	E14.5	13439	3285	2.12813	10183	3269	0.141839	-0.0310833	S	E14.5	5	5
CCACTACTCCACGTTC-1	E14.5	8010	2278	3.74532	8902	2278	0.189193	-0.119138	S	E14.5	3	3
CCAGCGAAGGGTCTCC-1	E14.5	9361	2668	2.93772	9361	2668	-0.108201	0.158751	G2M	E14.5	0	0
CCAGCGAAGTGTTAGA-1	E14.5	14991	3828	2.70162	10225	3753	-0.121226	0.233057	G2M	E14.5	0	0
CCAGCGACACGGTAAG-1	E14.5	6221	2158	3.0381	8600	2162	0.0348579	-0.181929	S	E14.5	1	1
CCAGCGACAGCCTTGG-1	E14.5	21746	4958	2.63037	10487	4014	-0.161886	0.363751	G2M	E14.5	0	0
CCAGCGACATAAGACA-1	E14.5	15946	4155	2.95999	10311	3995	0.163944	0.299515	G2M	E14.5	1	1
CCAGCGACATGCTAGT-1	E14.5	7600	2238	2.01316	8790	2237	-0.117062	-0.150282	G1	E14.5	6	6
CCAGCGATCACATAGC-1	E14.5	6677	2177	3.90894	8639	2177	-0.0845996	-0.225373	G1	E14.5	0	0
CCAGCGATCATTGCCC-1	E14.5	19760	4680	3.30972	10603	4103	-0.0228844	0.316265	G2M	E14.5	10	10
CCATGTCAGACAGACC-1	E14.5	29104	5507	3.78986	9739	3004	-0.12836	0.0344879	G2M	E14.5	5	5
CCATGTCAGCCAGTTT-1	E14.5	13545	3046	2.63566	10148	3027	-0.0198444	0.193483	G2M	E14.5	2	2
CCATGTCAGCTGAAAT-1	E14.5	6563	2035	3.04739	8679	2037	0.0365136	-0.233633	S	E14.5	4	4
CCATGTCAGGTGATAT-1	E14.5	34262	5722	2.38748	9660	2870	-0.0317299	-0.0301981	G1	E14.5	16	16
CCATGTCAGTGTCCAT-1	E14.5	9118	2654	3.16955	9230	2654	-0.110096	-0.211345	G1	E14.5	1	1
CCATGTCCAATAAGCA-1	E14.5	8349	2455	2.81471	8959	2455	-0.0320546	0.36695	G2M	E14.5	0	0
CCATGTCCACATCTTT-1	E14.5	6602	2542	3.40806	8533	2543	-0.201987	-0.0116411	G1	E14.5	1	1
CCATGTCCAGTAACGG-1	E14.5	6071	2174	2.75078	8577	2181	0.138796	-0.12848	S	E14.5	5	5
CCATGTCTCACGCGGT-1	E14.5	6969	2252	3.98909	8695	2252	0.151437	-0.00761166	S	E14.5	1	1
CCATGTCTCAGTCAGT-1	E14.5	9963	2794	4.055	9622	2792	-0.0489317	-0.245036	G1	E14.5	3	3
CCATGTCTCGAGAGCA-1	E14.5	8541	2611	3.62955	9013	2611	-0.154545	-0.310825	G1	E14.5	0	0
CCATTCGAGTGGTCCC-1	E14.5	12168	2899	2.43261	10032	2893	0.0406346	-0.044933	S	E14.5	16	16
CCATTCGCACGGACAA-1	E14.5	6591	2256	2.98892	8583	2256	-0.0151171	-0.166013	G1	E14.5	6	6
CCATTCGCACGGATAG-1	E14.5	7272	2132	3.35534	8749	2131	-0.126387	-0.187839	G1	E14.5	3	3
CCATTCGCATCTATGG-1	E14.5	12347	3245	3.28015	10110	3243	-0.039327	0.327293	G2M	E14.5	3	3
CCATTCGGTCCGTCAG-1	E14.5	8610	2588	2.6597	9017	2588	-0.146747	-0.282746	G1	E14.5	17	17
CCATTCGGTCGAGTTT-1	E14.5	14377	3056	3.0674	10129	2981	-0.165325	0.230138	G2M	E14.5	2	2
CCATTCGGTCTTGTCC-1	E14.5	12535	3035	3.29477	10116	3020	-0.236166	-0.286723	G1	E14.5	14	14
CCATTCGGTGGTTTCA-1	E14.5	5290	2177	3.57278	8392	2195	0.198758	-0.00961463	S	E14.5	1	1
CCATTCGTCAGTACGT-1	E14.5	23277	4459	3.11037	10094	3114	-0.0798754	0.212857	G2M	E14.5	7	7
CCATTCGTCATGTGGT-1	E14.5	8720	2769	3.52064	9036	2769	-0.177151	0.342788	G2M	E14.5	5	5
CCCAATCAGATGCCTT-1	E14.5	17084	3892	3.11988	10323	3634	0.0767391	0.233237	G2M	E14.5	6	6
CCCAATCAGTTCGATC-1	E14.5	7890	2577	3.40938	8815	2577	-0.193202	-0.290997	G1	E14.5	1	1
CCCAATCCAAGACGTG-1	E14.5	9889	3201	4.42916	9630	3199	0.0203141	-0.0810254	S	E14.5	10	10
CCCAATCCACTAAGTC-1	E14.5	5722	2075	2.46417	8506	2090	0.0956387	-0.243721	S	E14.5	0	0
CCCAATCCAGCCAGAA-1	E14.5	10972	2888	4.393	9894	2886	-0.203156	-0.233153	G1	E14.5	18	18
CCCAATCTCCCAGGTG-1	E14.5	6933	2256	2.49531	8674	2257	-0.136177	-0.295482	G1	E14.5	1	1
CCCAATCTCGGAGCAA-1	E14.5	9765	3017	2.86738	9568	3017	0.0933216	-0.241923	S	E14.5	0	0
CCCAATCTCTGTACGA-1	E14.5	5932	2206	2.88267	8507	2221	0.142531	-0.175395	S	E14.5	0	0
CCCAGTTCAACCGCCA-1	E14.5	18464	3908	2.33427	10462	3533	0.340806	-0.0703338	S	E14.5	7	7
CCCAGTTCAAGCGTAG-1	E14.5	13967	3284	2.1336	10219	3255	-0.0523435	0.458	G2M	E14.5	3	3
CCCAGTTCAATAGCGG-1	E14.5	9098	2771	3.30842	9216	2771	0.0533024	0.495003	G2M	E14.5	10	10
CCCAGTTCACCGAAAG-1	E14.5	17374	4262	2.9642	10457	4000	0.0069222	0.211617	G2M	E14.5	5	5
CCCAGTTCATCAGTCA-1	E14.5	19742	4156	1.71209	10402	3572	-0.0842098	0.425373	G2M	E14.5	3	3
CCCAGTTGTAAGTAGT-1	E14.5	11085	3049	3.18448	9923	3047	-0.181171	0.199945	G2M	E14.5	3	3
CCCAGTTGTAGAGGAA-1	E14.5	6808	2256	3.78966	8649	2257	0.0423987	0.126691	G2M	E14.5	4	4
CCCAGTTGTCAAACTC-1	E14.5	11615	3381	3.31468	10088	3378	-0.141232	-0.326951	G1	E14.5	0	0
CCCAGTTTCCTACAGA-1	E14.5	8626	2622	2.61999	9019	2620	0.0613761	-0.307953	S	E14.5	0	0
CCCATACAGAATTGTG-1	E14.5	7291	2448	3.27801	8689	2448	0.0383343	0.352731	G2M	E14.5	4	4
CCCATACAGCTAGTTC-1	E14.5	13863	3367	2.85652	10203	3338	-0.11484	-0.237173	G1	E14.5	2	2
CCCATACAGTGGGTTG-1	E14.5	11710	3028	3.24509	10003	3026	-0.116906	-0.2728	G1	E14.5	15	15
CCCATACCATGTTGAC-1	E14.5	13522	3124	3.62372	10166	3105	-0.0497274	-0.0690252	G1	E14.5	7	7
CCCATACGTAAATACG-1	E14.5	8291	2520	2.21927	8944	2520	-0.101389	-0.277789	G1	E14.5	4	4
CCCATACGTCGAACAG-1	E14.5	7259	2252	2.90674	8724	2253	-0.0829272	0.511606	G2M	E14.5	6	6
CCCATACGTTTGGGCC-1	E14.5	20354	4621	2.28456	10503	3967	-0.110554	-0.14891	G1	E14.5	6	6
CCCATACTCAAGGCTT-1	E14.5	8370	2348	3.03465	8993	2348	-0.0614328	-0.248428	G1	E14.5	0	0
CCCATACTCTCAAACG-1	E14.5	22536	4566	3.04402	10206	3416	-0.162782	-0.346087	G1	E14.5	12	12
CCCATACTCTTCAACT-1	E14.5	10024	2400	2.78332	9612	2400	-0.212358	-0.295137	G1	E14.5	12	12
CCCTCCTAGCGGCTTC-1	E14.5	26026	5266	2.87405	9948	3359	-0.147692	0.110322	G2M	E14.5	11	11
CCCTCCTCACCGCTAG-1	E14.5	10885	3179	2.93983	9917	3179	0.143086	0.0347732	S	E14.5	0	0
CCCTCCTCACGGCTAC-1	E14.5	6813	2317	1.96683	8635	2316	-0.0954898	-0.292308	G1	E14.5	1	1
CCCTCCTCAGATAATG-1	E14.5	10136	2537	2.48619	9656	2537	-0.0647887	0.218295	G2M	E14.5	8	8
CCCTCCTCATATGGTC-1	E14.5	5298	2113	2.92563	8425	2157	-0.156055	-0.25338	G1	E14.5	1	1
CCCTCCTGTAATCACC-1	E14.5	24150	4801	3.4824	10213	3350	0.239418	0.0737412	S	E14.5	11	11
CCCTCCTGTGAGTGAC-1	E14.5	7470	2359	2.46319	8776	2359	0.208156	0.0543609	S	E14.5	0	0
CCCTCCTGTTGCGCAC-1	E14.5	9924	3251	2.25715	9651	3251	0.166046	-0.23384	S	E14.5	9	9
CCCTCCTTCAGAGCTT-1	E14.5	6303	2342	4.28367	8596	2345	0.141414	0.188697	G2M	E14.5	0	0
CCCTCCTTCGCATGAT-1	E14.5	9133	2710	3.32859	9237	2710	0.0618233	0.0792492	G2M	E14.5	3	3
CCCTCCTTCGTGACAT-1	E14.5	13510	3155	2.28719	10170	3130	-0.248123	0.098122	G2M	E14.5	12	12
CCCTCCTTCTTGAGGT-1	E14.5	7209	2117	3.49563	8732	2116	-0.190396	-0.151978	G1	E14.5	8	8
CCGGGATAGAATTGTG-1	E14.5	10903	2871	2.97166	9873	2870	0.257832	-0.288614	S	E14.5	3	3
CCGGGATAGTCAAGGC-1	E14.5	11801	2828	2.6269	9953	2827	0.261502	-0.0480062	S	E14.5	2	2
CCGGGATCAAGAAGAG-1	E14.5	8205	2640	3.69287	8893	2639	-0.196917	-0.106658	G1	E14.5	1	1
CCGGGATCAAGCCTAT-1	E14.5	11394	3140	3.28243	9974	3139	-0.135118	-0.0321678	G1	E14.5	0	0
CCGGGATGTCTCATCC-1	E14.5	9566	2838	3.53335	9467	2838	-0.222976	-0.198587	G1	E14.5	0	0
CCGGGATGTGGAAAGA-1	E14.5	14810	3890	2.84267	10251	3822	-0.133339	0.0389705	G2M	E14.5	6	6
CCGGTAGAGATGGGTC-1	E14.5	8796	2789	2.34197	9071	2789	-0.0752971	0.551375	G2M	E14.5	6	6
CCGGTAGCAAGCCCAC-1	E14.5	17938	4127	3.27238	10492	3845	-0.085746	0.255164	G2M	E14.5	15	15
CCGGTAGCAGATCTGT-1	E14.5	15895	3295	2.91287	10125	3131	-0.0638033	0.333462	G2M	E14.5	2	2
CCGGTAGGTAGCTTGT-1	E14.5	10169	2750	3.42217	9682	2750	0.00962887	-0.262461	S	E14.5	0	0
CCGGTAGGTGTCCTCT-1	E14.5	8307	2445	3.12989	8946	2445	0.191983	-0.177009	S	E14.5	3	3
CCGGTAGGTTATGCGT-1	E14.5	6245	2191	3.29864	8614	2197	-0.127352	-0.270985	G1	E14.5	5	5
CCGGTAGTCAACCATG-1	E14.5	11377	3009	2.17105	9961	3009	-0.154944	-0.0849753	G1	E14.5	2	2
CCGGTAGTCACGAAGG-1	E14.5	11025	2442	2.35828	9825	2442	0.210659	-0.1296	S	E14.5	3	3
CCGGTAGTCTGAGTGT-1	E14.5	9271	2610	2.62108	9287	2609	0.110189	0.0598791	S	E14.5	5	5
CCGTACTAGAAGATTC-1	E14.5	10335	2783	3.93807	9741	2783	-0.0986664	-0.197915	G1	E14.5	7	7
CCGTACTAGAGTAATC-1	E14.5	10649	3063	2.74204	9847	3061	-0.197748	-0.228716	G1	E14.5	4	4
CCGTACTAGCCTATGT-1	E14.5	6298	2270	3.23912	8613	2269	-0.138698	-0.217622	G1	E14.5	9	9
CCGTACTAGTCCTCCT-1	E14.5	22377	4574	2.75283	10231	3450	0.171547	-0.254691	S	E14.5	3	3
CCGTACTCAAGTAATG-1	E14.5	14482	3372	2.98301	10174	3288	-0.0340954	-0.147105	G1	E14.5	14	14
CCGTACTCAATCACAC-1	E14.5	7673	2480	2.55441	8763	2480	-0.118481	-0.263228	G1	E14.5	0	0
CCGTACTCACACGCTG-1	E14.5	12124	3159	3.38997	10082	3159	-0.0518569	-0.313079	G1	E14.5	4	4
CCGTACTCACGGTAGA-1	E14.5	5526	2050	4.61455	8479	2074	-0.00122044	-0.184943	G1	E14.5	4	4
CCGTACTCATGCCTAA-1	E14.5	9047	2839	2.80756	9187	2838	-0.138848	-0.262891	G1	E14.5	0	0
CCGTACTCATGTTCCC-1	E14.5	7696	2173	3.22245	8844	2173	-0.00342329	-0.234866	G1	E14.5	0	0
CCGTACTGTCTTTCAT-1	E14.5	24777	5244	2.29245	9979	3412	0.00891507	-0.222342	S	E14.5	0	0
CCGTACTGTGATAAAC-1	E14.5	7558	2416	2.52712	8764	2415	-0.177476	0.121397	G2M	E14.5	6	6
CCGTACTGTGGACGAT-1	E14.5	8315	2609	3.16296	8929	2608	0.0780774	-0.129305	S	E14.5	4	4
CCGTACTGTTCACGGC-1	E14.5	26586	5082	1.95968	9841	3079	-0.0916013	-0.0508946	G1	E14.5	7	7
CCGTACTTCCTAGTGA-1	E14.5	17653	3849	2.12428	10407	3576	0.0712277	0.123352	G2M	E14.5	7	7
CCGTGGAAGCTAGTGG-1	E14.5	13725	3248	3.05282	10165	3215	-0.0721599	0.0233736	G2M	E14.5	0	0
CCGTGGACAAGTTGTC-1	E14.5	6691	2393	3.57196	8577	2394	0.25653	-0.106669	S	E14.5	10	10
CCGTGGACAGCTGTTA-1	E14.5	27325	5235	3.10339	9683	3014	-0.101276	0.0525052	G2M	E14.5	11	11
CCGTGGACAGGGTATG-1	E14.5	16112	3577	2.77433	10265	3438	0.04898	0.189794	G2M	E14.5	2	2
CCGTGGACATGGTAGG-1	E14.5	7172	2336	2.27273	8695	2334	-0.0967811	-0.247071	G1	E14.5	5	5
CCGTGGAGTCACCCAG-1	E14.5	7617	2386	3.13772	8797	2386	-0.0953481	-0.261585	G1	E14.5	0	0
CCGTGGAGTCATGCCG-1	E14.5	7637	2035	3.82349	8863	2035	0.183954	-0.104608	S	E14.5	2	2
CCGTGGAGTCCAGTGC-1	E14.5	7223	2245	3.29503	8738	2244	-0.128198	-0.273857	G1	E14.5	0	0
CCGTGGATCAACACCA-1	E14.5	10035	2911	3.13901	9659	2911	0.0683581	-0.208422	S	E14.5	0	0
CCGTGGATCACTCCTG-1	E14.5	21054	4243	3.1253	10376	3462	-0.000938343	0.147419	G2M	E14.5	7	7
CCGTGGATCCTCGCAT-1	E14.5	7815	2128	3.19898	8876	2128	-0.0820441	0.0596536	G2M	E14.5	2	2
CCGTGGATCTCTTGAT-1	E14.5	28270	5313	2.47966	9487	2846	-0.146685	-0.120836	G1	E14.5	0	0
CCGTTCAAGTGGAGAA-1	E14.5	8083	2390	3.35272	8902	2389	-0.0149142	-0.154021	G1	E14.5	8	8
CCGTTCAAGTTCCACA-1	E14.5	9882	2903	2.77272	9602	2903	0.188827	-0.130342	S	E14.5	0	0
CCGTTCACAGCCTGTG-1	E14.5	16250	4138	2.18462	10359	3981	-0.150254	0.49908	G2M	E14.5	1	1
CCGTTCACAGGGTATG-1	E14.5	10560	2925	2.96402	9808	2925	0.0633583	0.292141	G2M	E14.5	5	5
CCGTTCACATGCAATC-1	E14.5	6600	2198	2.69697	8602	2200	-0.141273	-0.277766	G1	E14.5	5	5
CCGTTCAGTAGCTTGT-1	E14.5	8122	2645	3.17656	8860	2645	0.170972	-0.118382	S	E14.5	0	0
CCGTTCAGTGATAAAC-1	E14.5	8790	2552	2.73038	9104	2552	-0.0860947	-0.12511	G1	E14.5	7	7
CCGTTCAGTGCGCTTG-1	E14.5	15884	4034	3.04709	10263	3907	0.0880685	0.122925	G2M	E14.5	0	0
CCTAAAGAGCGCCTCA-1	E14.5	5535	2012	3.23397	8493	2039	-0.0998797	-0.162085	G1	E14.5	1	1
CCTAAAGAGGATGGTC-1	E14.5	9362	2728	3.22581	9361	2727	0.108189	-0.125848	S	E14.5	6	6
CCTAAAGCAACTGGCC-1	E14.5	6895	2491	2.43655	8603	2490	-0.0534382	0.540622	G2M	E14.5	0	0
CCTAAAGCAATCTACG-1	E14.5	9652	2975	2.97348	9517	2974	-0.119723	-0.13326	G1	E14.5	5	5
CCTAAAGCAGGCGATA-1	E14.5	10176	2823	2.60417	9691	2822	0.179737	-0.054672	S	E14.5	6	6
CCTAAAGGTACAGCAG-1	E14.5	21710	4030	2.07738	10135	3012	-0.193936	-0.326462	G1	E14.5	13	13
CCTAAAGGTACCGTTA-1	E14.5	9512	3013	2.89108	9441	3012	-0.154401	-0.258792	G1	E14.5	5	5
CCTAAAGGTCAACATC-1	E14.5	8615	2862	2.40279	8984	2860	0.251758	0.0427883	S	E14.5	1	1
CCTAAAGGTCTAGTCA-1	E14.5	7555	2104	3.30907	8799	2105	-0.0965867	-0.232887	G1	E14.5	8	8
CCTAAAGGTCTCTCTG-1	E14.5	6155	2110	2.76198	8603	2117	-0.185418	-0.235294	G1	E14.5	1	1
CCTAAAGGTGCAACGA-1	E14.5	7648	2366	3.0204	8787	2366	0.34472	0.116354	S	E14.5	0	0
CCTAAAGGTGGTCCGT-1	E14.5	11583	2811	2.6677	9938	2810	0.0936086	-0.0703363	S	E14.5	2	2
CCTAAAGTCACTCTTA-1	E14.5	7134	2695	3.05579	8590	2695	0.22984	-0.168848	S	E14.5	1	1
CCTAAAGTCACTTCAT-1	E14.5	14384	3750	2.5584	10281	3709	-0.225533	-0.309555	G1	E14.5	4	4
CCTACACAGGAGCGAG-1	E14.5	10312	2954	2.87044	9747	2954	-0.210065	-0.339753	G1	E14.5	1	1
CCTACACAGGTGCACA-1	E14.5	10337	3139	3.81155	9795	3139	-0.121486	-0.250709	G1	E14.5	10	10
CCTACACAGTACGCGA-1	E14.5	6311	2165	4.30994	8635	2171	-0.0729777	0.494289	G2M	E14.5	0	0
CCTACACCAACTGCGC-1	E14.5	9022	2920	2.20572	9174	2919	-0.0262297	0.26453	G2M	E14.5	4	4
CCTACACCAATCCAAC-1	E14.5	8377	2463	2.26812	8973	2462	-0.0863642	0.114865	G2M	E14.5	0	0
CCTACACCACCACCAG-1	E14.5	9371	3135	2.34767	9370	3134	-0.236672	-0.304581	G1	E14.5	1	1
CCTACACCACGCCAGT-1	E14.5	9108	2769	3.05226	9220	2769	-0.22233	-0.285158	G1	E14.5	0	0
CCTACACGTCTCTTTA-1	E14.5	21437	4689	2.64962	10408	3772	-0.11685	0.131146	G2M	E14.5	8	8
CCTACACTCAACACCA-1	E14.5	6604	2230	3.02847	8607	2231	0.189586	0.0608003	S	E14.5	6	6
CCTACACTCAAGCCTA-1	E14.5	11569	2941	3.52667	9979	2941	0.15701	0.0343729	S	E14.5	2	2
CCTACACTCACAACGT-1	E14.5	15100	3610	3.05298	10156	3503	-0.0133709	-0.356776	G1	E14.5	1	1
CCTACACTCGGAATCT-1	E14.5	7018	2111	3.64776	8722	2111	0.00621702	-0.228145	S	E14.5	3	3
CCTACACTCTCCAACC-1	E14.5	9421	2530	3.22683	9412	2529	-0.0386393	-0.259655	G1	E14.5	12	12
CCTACCAAGAATCTCC-1	E14.5	7133	2243	2.52348	8724	2243	0.0736376	0.296683	G2M	E14.5	4	4
CCTACCAAGCATGGCA-1	E14.5	10610	2599	2.91235	9786	2598	0.152257	-0.0552526	S	E14.5	2	2
CCTACCAAGCCAACAG-1	E14.5	6939	2329	3.55959	8645	2329	0.142597	-0.16973	S	E14.5	1	1
CCTACCAAGTGGTCCC-1	E14.5	11291	2761	2.9404	9903	2759	-0.123104	0.306682	G2M	E14.5	2	2
CCTACCACAGGACCCT-1	E14.5	11047	3353	3.02345	9984	3353	0.112377	-0.215201	S	E14.5	1	1
CCTACCACAGGATCGA-1	E14.5	8374	2367	0.501552	8959	2365	-0.0226425	0.475985	G2M	E14.5	5	5
CCTACCACAGGTTTCA-1	E14.5	23462	5196	2.61274	10301	3808	0.00881355	-0.0638312	S	E14.5	0	0
CCTACCACATAAAGGT-1	E14.5	21180	4674	2.35127	10470	3868	-0.117664	0.383863	G2M	E14.5	4	4
CCTACCACATATGCTG-1	E14.5	7049	2684	3.94382	8580	2685	0.195516	0.108323	S	E14.5	0	0
CCTACCACATGCAATC-1	E14.5	13341	3218	2.99078	10194	3200	-0.12906	-0.282918	G1	E14.5	5	5
CCTACCACATTGGTAC-1	E14.5	8684	2719	2.59097	9054	2717	-0.15521	0.387213	G2M	E14.5	0	0
CCTACCAGTCTAGCGC-1	E14.5	8159	2245	3.81174	8936	2245	-0.0829813	-0.216215	G1	E14.5	2	2
CCTACCATCTACTTAC-1	E14.5	7539	2215	3.55485	8789	2215	-0.0970857	-0.225646	G1	E14.5	3	3
CCTAGCTAGACTTGAA-1	E14.5	25871	5508	2.37331	9906	3479	-0.0398513	-0.00894366	G1	E14.5	4	4
CCTAGCTAGGACAGCT-1	E14.5	7573	2351	3.35402	8785	2351	-0.0663381	-0.179488	G1	E14.5	3	3
CCTAGCTAGGGAAACA-1	E14.5	13810	3558	3.51919	10309	3520	-0.216689	0.215525	G2M	E14.5	18	18
CCTAGCTCAACACCTA-1	E14.5	7895	2314	2.38125	8868	2314	-0.161506	-0.213572	G1	E14.5	0	0
CCTAGCTCAGCATGAG-1	E14.5	5874	2022	3.33674	8546	2037	-0.028611	-0.184743	G1	E14.5	1	1
CCTAGCTCATTCGACA-1	E14.5	6353	2164	3.6833	8629	2173	-0.104431	-0.224103	G1	E14.5	0	0
CCTAGCTGTAGAGGAA-1	E14.5	9330	2469	2.33655	9330	2469	0.329453	0.238324	S	E14.5	6	6
CCTAGCTGTCACAAGG-1	E14.5	14811	3816	2.69394	10267	3745	0.0685771	-0.0286488	S	E14.5	1	1
CCTAGCTGTCATGCAT-1	E14.5	11144	2999	2.70998	9943	2996	0.182661	0.200552	G2M	E14.5	1	1
CCTAGCTGTCGAATCT-1	E14.5	6404	2325	2.7639	8563	2328	-0.097893	-0.287403	G1	E14.5	1	1
CCTAGCTTCAACACGT-1	E14.5	16524	3991	2.8504	10350	3824	-0.0585499	0.289658	G2M	E14.5	5	5
CCTATTAAGACAGGCT-1	E14.5	9143	2549	2.9312	9243	2549	-0.192322	-0.0927657	G1	E14.5	12	12
CCTATTAAGAGTACCG-1	E14.5	5357	2010	2.70674	8472	2055	0.0941222	-0.0733913	S	E14.5	4	4
CCTATTAAGCTGAACG-1	E14.5	8977	2345	2.87401	9191	2345	0.0346517	0.384944	G2M	E14.5	2	2
CCTATTAAGTGTCTCA-1	E14.5	26261	5454	2.98161	9940	3359	-0.253848	-0.267304	G1	E14.5	2	2
CCTATTAAGTTGAGTA-1	E14.5	8706	2368	2.74523	9092	2367	0.0396441	0.100517	G2M	E14.5	2	2
CCTATTACAAGCGTAG-1	E14.5	7310	2004	2.74966	8796	2004	-0.0926614	-0.169551	G1	E14.5	3	3
CCTATTACACGAGAGT-1	E14.5	7924	2544	4.03836	8795	2543	0.0830438	0.273413	G2M	E14.5	15	15
CCTATTACAGATGGCA-1	E14.5	7305	2306	2.5462	8725	2306	-0.0989947	-0.275438	G1	E14.5	1	1
CCTATTACATGGAATA-1	E14.5	6553	2174	3.00626	8625	2177	-0.0162932	-0.232461	G1	E14.5	4	4
CCTATTAGTACAAGTA-1	E14.5	9904	2693	2.45355	9606	2692	0.0153311	0.0396275	G2M	E14.5	2	2
CCTATTAGTGACTACT-1	E14.5	10218	2568	3.61127	9670	2567	0.138799	-0.23853	S	E14.5	2	2
CCTATTATCGGATGTT-1	E14.5	9560	2865	2.85565	9469	2865	-0.145563	-0.269552	G1	E14.5	4	4
CCTATTATCTAGAGTC-1	E14.5	11042	3148	3.03387	9949	3148	-0.193982	-0.191931	G1	E14.5	4	4
CCTCAGTAGAAGGACA-1	E14.5	7304	2111	3.8609	8756	2110	-0.010258	0.128719	G2M	E14.5	3	3
CCTCAGTAGATCCGAG-1	E14.5	10564	2699	3.71072	9786	2698	-0.0083368	-0.154834	G1	E14.5	8	8
CCTCAGTAGGAATCGC-1	E14.5	10137	2922	3.2554	9685	2922	-0.0708167	-0.313753	G1	E14.5	0	0
CCTCAGTAGTGGTAAT-1	E14.5	10568	2853	2.93338	9793	2852	0.00578731	-0.272245	S	E14.5	0	0
CCTCAGTCAAGACGTG-1	E14.5	8407	2490	3.91341	8958	2490	0.261456	-0.130338	S	E14.5	3	3
CCTCAGTCACAGACTT-1	E14.5	24612	4566	2.19811	10016	2992	-0.139494	0.556381	G2M	E14.5	15	15
CCTCAGTCACCAGTTA-1	E14.5	8329	2656	2.46128	8911	2656	-0.0900425	-0.274363	G1	E14.5	9	9
CCTCAGTCAGCTGGCT-1	E14.5	13125	3539	3.3219	10224	3528	0.0959165	-0.134891	S	E14.5	0	0
CCTCAGTCATGTCTCC-1	E14.5	8534	2546	2.37872	9013	2546	0.0584838	-0.251582	S	E14.5	3	3
CCTCAGTGTGGCAAAC-1	E14.5	15918	3819	2.26787	10253	3700	-0.14483	-0.201983	G1	E14.5	3	3
CCTCAGTTCCAGGGCT-1	E14.5	5736	2103	3.08577	8498	2121	0.315646	-0.0513612	S	E14.5	0	0
CCTCAGTTCGCGTTTC-1	E14.5	5892	2143	2.10455	8537	2152	-0.114778	-0.304611	G1	E14.5	1	1
CCTCAGTTCTCAAACG-1	E14.5	6424	2254	2.66189	8607	2257	-0.15498	-0.24262	G1	E14.5	0	0
CCTCAGTTCTGGGCCA-1	E14.5	11516	3158	2.30983	10023	3157	0.153338	-0.188462	S	E14.5	1	1
CCTCAGTTCTTTCCTC-1	E14.5	10487	3054	1.99294	9834	3054	-0.0756627	0.64329	G2M	E14.5	6	6
CCTCTGAAGATCGGGT-1	E14.5	16337	3538	2.80957	10222	3338	-0.147946	-0.356244	G1	E14.5	12	12
CCTCTGAAGGAATCGC-1	E14.5	24202	5094	2.99975	9997	3422	-0.034141	-0.117727	G1	E14.5	3	3
CCTCTGAAGGGCATGT-1	E14.5	15346	3240	3.17347	10119	3118	0.204487	-0.0199918	S	E14.5	2	2
CCTCTGAAGTAGCGGT-1	E14.5	5939	2039	3.4686	8567	2047	-0.110464	-0.154271	G1	E14.5	3	3
CCTCTGAAGTGTGGCA-1	E14.5	14169	3228	3.2677	10189	3181	0.240776	-0.0690713	S	E14.5	7	7
CCTCTGACAATCGAAA-1	E14.5	9443	2722	2.78513	9428	2722	0.173382	0.166198	S	E14.5	17	17
CCTCTGACACGAAGCA-1	E14.5	8653	2758	2.10332	9024	2756	0.162615	-0.210233	S	E14.5	0	0
CCTCTGAGTAAAGGAG-1	E14.5	8290	2332	2.91918	8969	2330	0.104003	-0.131601	S	E14.5	3	3
CCTCTGAGTAGGGACT-1	E14.5	11077	2887	3.38539	9892	2886	-0.0739132	-0.259617	G1	E14.5	0	0
CCTCTGAGTATGCTTG-1	E14.5	5243	2056	4.44402	8415	2097	-0.0956462	-0.0757096	G1	E14.5	1	1
CCTCTGAGTCTCTCGT-1	E14.5	9108	2696	3.43654	9227	2695	-0.156075	-0.262453	G1	E14.5	1	1
CCTCTGAGTGCAGTAG-1	E14.5	9075	2913	3.51515	9201	2912	-0.167555	-0.19297	G1	E14.5	1	1
CCTCTGAGTTGTCGCG-1	E14.5	7650	2247	2.44444	8820	2247	-0.0557902	-0.18676	G1	E14.5	1	1
CCTCTGATCAGGCAAG-1	E14.5	14023	3230	3.21614	10138	3186	-0.0425752	0.0578708	G2M	E14.5	7	7
CCTTACGAGTGGACGT-1	E14.5	10220	2384	2.84736	9653	2383	-0.00458487	-0.340447	G1	E14.5	2	2
CCTTACGAGTGTGAAT-1	E14.5	17655	4163	2.68479	10471	3874	0.225561	-0.253616	S	E14.5	1	1
CCTTACGCAAACGCGA-1	E14.5	5959	2198	2.7857	8547	2210	-0.0709153	-0.181285	G1	E14.5	9	9
CCTTACGCATTGGTAC-1	E14.5	6164	2280	3.82868	8594	2286	0.239697	-0.0839925	S	E14.5	1	1
CCTTACGGTTCCATGA-1	E14.5	8591	2923	3.07298	8995	2923	-0.0515561	-0.201233	G1	E14.5	1	1
CCTTACGGTTTGACAC-1	E14.5	24119	4981	2.40889	10119	3451	-0.0185422	0.571607	G2M	E14.5	0	0
CCTTACGTCATTCACT-1	E14.5	7041	2240	2.85471	8709	2240	-0.0494601	-0.192492	G1	E14.5	4	4
CCTTACGTCCCAGGTG-1	E14.5	17690	4234	2.97343	10445	3907	-0.265002	-0.0262004	G1	E14.5	8	8
CCTTACGTCGAATGGG-1	E14.5	8256	2260	2.89486	8972	2260	-0.0363603	-0.313072	G1	E14.5	2	2
CCTTACGTCTGCGACG-1	E14.5	6866	2368	2.53423	8621	2370	-0.162704	-0.243359	G1	E14.5	1	1
CCTTCCCAGCGATAGC-1	E14.5	6469	2151	3.46267	8606	2159	0.146094	0.0835126	S	E14.5	5	5
CCTTCCCAGGATGGAA-1	E14.5	7973	2435	2.68406	8855	2432	0.226609	-0.105345	S	E14.5	6	6
CCTTCCCCAGGGAGAG-1	E14.5	11905	3076	3.18354	10046	3075	0.207232	-0.131964	S	E14.5	10	10
CCTTCCCCATAAGACA-1	E14.5	7288	2328	3.01866	8734	2328	-0.109853	-0.220788	G1	E14.5	0	0
CCTTCCCGTCAGAAGC-1	E14.5	13920	3783	2.81609	10310	3748	-0.273258	-0.3152	G1	E14.5	0	0
CCTTCCCGTCGGGTCT-1	E14.5	9368	2638	2.50854	9367	2637	0.000593832	-0.288041	S	E14.5	16	16
CCTTCCCGTCTCATCC-1	E14.5	11608	2290	1.29221	9877	2287	-0.125906	-0.237941	G1	E14.5	13	13
CCTTCCCGTGGACGAT-1	E14.5	6442	2165	3.86526	8638	2167	-0.0454169	-0.229793	G1	E14.5	4	4
CCTTCCCGTGTAATGA-1	E14.5	9097	2663	3.48467	9218	2663	0.0304582	0.212433	G2M	E14.5	1	1
CCTTCCCGTTGCTCCT-1	E14.5	7871	2259	3.27786	8862	2259	0.097099	-0.196665	S	E14.5	0	0
CCTTCCCTCAGCACAT-1	E14.5	5976	2388	3.34672	8493	2399	-0.05243	-0.275102	G1	E14.5	1	1
CCTTCCCTCCAGGGCT-1	E14.5	6549	2037	3.11498	8663	2041	-0.0350221	-0.197013	G1	E14.5	3	3
CCTTCCCTCCCATTAT-1	E14.5	12579	3303	2.70292	10143	3295	0.438122	0.00279885	S	E14.5	10	10
CCTTCCCTCTATCCTA-1	E14.5	9510	3250	3.08097	9454	3249	0.281684	-0.118184	S	E14.5	0	0
CCTTCGAAGTACGATA-1	E14.5	6685	2457	3.26103	8534	2460	-0.123614	0.472522	G2M	E14.5	1	1
CCTTCGAAGTGGAGTC-1	E14.5	13944	3705	4.10212	10322	3661	0.106594	0.331365	G2M	E14.5	1	1
CCTTCGACAAACAACA-1	E14.5	10838	2828	3.46005	9849	2827	-0.0693845	0.258416	G2M	E14.5	3	3
CCTTCGACACGAAGCA-1	E14.5	9745	2695	2.93484	9549	2695	0.124731	0.185566	G2M	E14.5	3	3
CCTTCGACAGTCGTGC-1	E14.5	6296	2071	3.03367	8628	2070	0.0413488	-0.195205	S	E14.5	6	6
CCTTCGAGTCAACATC-1	E14.5	11487	3186	3.56055	10017	3185	-0.0540436	0.288495	G2M	E14.5	4	4
CCTTCGAGTGAGCGAT-1	E14.5	6973	2250	3.54223	8687	2249	-0.174853	-0.270385	G1	E14.5	4	4
CCTTCGAGTTCAGACT-1	E14.5	9290	2650	3.04629	9299	2650	0.154594	-0.09263	S	E14.5	3	3
CCTTCGAGTTCAGCGC-1	E14.5	9000	2586	4.32222	9178	2585	-0.0892906	-0.226202	G1	E14.5	10	10
CCTTCGATCGGAAACG-1	E14.5	6672	2187	3.43225	8647	2190	-0.189928	-0.0572627	G1	E14.5	3	3
CCTTCGATCGTGACAT-1	E14.5	23406	4960	2.60617	10269	3623	0.101996	0.372312	G2M	E14.5	1	1
CCTTTCTAGCCAGAAC-1	E14.5	10633	2940	2.72736	9825	2940	-0.23439	-0.300399	G1	E14.5	0	0
CCTTTCTAGTGGACGT-1	E14.5	16985	3626	2.72005	10342	3378	0.011742	0.296642	G2M	E14.5	16	16
CCTTTCTGTAAACCTC-1	E14.5	5406	2115	2.34924	8432	2147	-0.0799407	-0.15328	G1	E14.5	1	1
CCTTTCTGTAGCACGA-1	E14.5	15860	3861	2.37705	10237	3739	-0.150767	-0.33679	G1	E14.5	0	0
CCTTTCTGTATAATGG-1	E14.5	12189	2930	2.47764	10034	2927	0.0678913	-0.050371	S	E14.5	2	2
CCTTTCTGTGCAGTAG-1	E14.5	7033	2263	3.39827	8703	2263	-0.0644549	-0.238107	G1	E14.5	14	14
CCTTTCTTCGGCTTGG-1	E14.5	21933	4410	3.48334	10230	3384	-0.127727	0.0443873	G2M	E14.5	2	2
CCTTTCTTCTTAGAGC-1	E14.5	15622	3812	2.56049	10242	3704	-0.217646	0.35392	G2M	E14.5	18	18
CGAACATAGAGACTTA-1	E14.5	29247	5421	3.18665	9593	2890	-0.133788	0.131159	G2M	E14.5	5	5
CGAACATAGTGGAGAA-1	E14.5	7403	2281	3.29596	8743	2282	-0.146146	-0.315355	G1	E14.5	3	3
CGAACATAGTGGAGTC-1	E14.5	13586	3121	2.45841	10143	3095	-0.014644	0.0233039	G2M	E14.5	7	7
CGAACATCAATGAAAC-1	E14.5	9637	2721	4.29594	9493	2720	-0.16224	-0.269882	G1	E14.5	5	5
CGAACATCACAAGACG-1	E14.5	11649	3150	3.40802	10023	3149	-0.100555	0.248916	G2M	E14.5	4	4
CGAACATCACTAGTAC-1	E14.5	6545	2175	2.94882	8621	2178	-0.0733142	-0.246088	G1	E14.5	1	1
CGAACATGTAGCTAAA-1	E14.5	10535	2835	3.11343	9802	2834	0.333925	0.0105466	S	E14.5	3	3
CGAACATGTATCTGCA-1	E14.5	11037	3452	2.87216	10000	3452	0.0316121	-0.160283	S	E14.5	0	0
CGAACATGTCCAACTA-1	E14.5	32551	5699	2.31944	9628	2947	-0.165605	0.0928775	G2M	E14.5	1	1
CGAACATGTCCGCTGA-1	E14.5	13833	3019	3.06513	10140	2983	-0.223285	-0.288321	G1	E14.5	2	2
CGAACATGTGTAACGG-1	E14.5	11033	2848	2.95477	9893	2847	-0.179962	-0.222112	G1	E14.5	5	5
CGAACATGTGTGAATA-1	E14.5	8296	2738	2.79653	8888	2738	-0.193621	0.0894841	G2M	E14.5	1	1
CGAACATGTTCGTGAT-1	E14.5	18254	4323	2.55287	10537	3984	-0.0710966	0.289333	G2M	E14.5	3	3
CGAACATTCACCATAG-1	E14.5	11103	2993	3.86382	9962	2992	0.140354	-0.0398505	S	E14.5	8	8
CGAACATTCAGCTCGG-1	E14.5	13254	3619	2.78407	10260	3600	-0.206752	-0.282643	G1	E14.5	1	1
CGAACATTCCATTCTA-1	E14.5	10351	3091	2.65675	9771	3088	-0.0902329	0.589291	G2M	E14.5	5	5
CGAACATTCGGACAAG-1	E14.5	6939	2253	3.27136	8686	2254	-0.162652	-0.158162	G1	E14.5	1	1
CGAACATTCTAACCGA-1	E14.5	11161	3065	3.38679	9948	3063	0.0950923	-0.12586	S	E14.5	0	0
CGAACATTCTTGCAAG-1	E14.5	8098	2089	2.33391	8923	2089	-0.181112	-0.252249	G1	E14.5	2	2
CGAATGTAGGATGGAA-1	E14.5	16890	3981	2.97809	10338	3752	-0.0936288	-0.153305	G1	E14.5	1	1
CGAATGTCAATTGCTG-1	E14.5	15712	3907	2.98498	10267	3788	-0.228139	0.223334	G2M	E14.5	0	0
CGAATGTCACCGAAAG-1	E14.5	5498	2011	2.8374	8469	2030	-0.128827	-0.209402	G1	E14.5	9	9
CGAATGTCACCGCTAG-1	E14.5	6821	2138	2.68289	8680	2139	-0.123468	-0.255948	G1	E14.5	1	1
CGAATGTCAGATAATG-1	E14.5	10076	2890	3.93013	9675	2888	-0.126715	0.420562	G2M	E14.5	5	5
CGAATGTCATACTACG-1	E14.5	7923	2561	2.42332	8822	2560	0.150653	0.174721	G2M	E14.5	0	0
CGAATGTCATGCTGGC-1	E14.5	11882	3242	3.31594	10080	3241	-0.0716206	-0.223092	G1	E14.5	5	5
CGAATGTGTCGTGGCT-1	E14.5	7235	2408	2.70905	8669	2409	0.003484	0.21003	G2M	E14.5	1	1
CGAATGTGTTGATTCG-1	E14.5	8019	2055	3.35453	8954	2055	-0.0411646	-0.261532	G1	E14.5	12	12
CGAATGTTCACGATGT-1	E14.5	17497	3734	3.03481	10368	3459	0.0847175	-0.130216	S	E14.5	7	7
CGAATGTTCCCTGACT-1	E14.5	8883	2404	2.51041	9144	2404	-0.120583	0.199976	G2M	E14.5	14	14
CGAATGTTCGCCAGCA-1	E14.5	7630	2334	4.02359	8796	2332	0.00146481	0.139094	G2M	E14.5	3	3
CGACCTTAGGCACATG-1	E14.5	16442	3447	3.27211	10250	3272	-0.179357	0.17692	G2M	E14.5	7	7
CGACCTTCAACGATCT-1	E14.5	14256	3684	2.2096	10281	3638	-0.201535	0.479049	G2M	E14.5	17	17
CGACCTTCACAGACTT-1	E14.5	16704	3809	3.10704	10307	3612	0.058625	-0.0146474	S	E14.5	2	2
CGACCTTCAGCTGCAC-1	E14.5	7152	2348	3.34172	8702	2347	0.0166254	-0.203629	S	E14.5	4	4
CGACCTTCAGCTTCGG-1	E14.5	7766	2133	2.45944	8829	2132	-0.139907	-0.0801069	G1	E14.5	2	2
CGACCTTCATTCTTAC-1	E14.5	15248	3605	4.3809	10167	3434	-0.167389	-0.243426	G1	E14.5	5	5
CGACCTTGTACCTACA-1	E14.5	11792	3163	3.1038	10027	3161	0.117928	-0.261055	S	E14.5	3	3
CGACCTTGTCCCGACA-1	E14.5	8272	2491	3.60251	8930	2489	-0.100451	-0.175441	G1	E14.5	0	0
CGACCTTTCAACCATG-1	E14.5	9463	2917	2.54676	9436	2917	-0.0349059	0.196563	G2M	E14.5	6	6
CGACCTTTCAATAAGG-1	E14.5	6580	2193	3.20669	8615	2197	-0.110332	-0.173416	G1	E14.5	5	5
CGACCTTTCCTAAGTG-1	E14.5	14466	3644	2.78584	10239	3596	0.154671	0.0995246	S	E14.5	6	6
CGACCTTTCTGGTATG-1	E14.5	7697	2393	2.10472	8787	2393	-0.088888	-0.318215	G1	E14.5	1	1
CGACTTCCAACTTGAC-1	E14.5	10105	2886	2.30579	9692	2886	0.224761	0.263244	G2M	E14.5	0	0
CGACTTCCAATCTGCA-1	E14.5	14061	3813	2.78074	10318	3757	0.0240679	-0.237495	S	E14.5	1	1
CGACTTCCACTTAAGC-1	E14.5	7241	2556	3.45256	8645	2557	-0.161947	0.59905	G2M	E14.5	10	10
CGACTTCGTCACTTCC-1	E14.5	7630	2394	3.43381	8797	2393	0.0356113	-0.200594	S	E14.5	0	0
[truncated: 3,206 more rows]

## Sheet: craniofacial_scRNA-seq_DEGs
p_val	avg_log2FC	pct.1	pct.2	p_val_adj	cluster	gene
1.98796e-168	0.956051	0.931	0.638	3.42705e-164	0	Prrx1
3.15208e-159	1.08223	0.659	0.279	5.43387e-155	0	Msx1
3.32019e-132	0.752021	0.667	0.307	5.72368e-128	0	Mab21l2
4.40995e-132	0.736328	0.621	0.268	7.60231e-128	0	Prrx2
4.90949e-107	0.666143	0.876	0.619	8.46347e-103	0	Bgn
9.62424e-91	0.473917	1	1	1.65912e-86	0	Malat1
1.05171e-89	0.52358	0.978	0.831	1.81304e-85	0	Mfap2
1.51043e-89	0.534522	0.561	0.259	2.60383e-85	0	Hmcn1
1.42775e-87	0.727019	0.858	0.661	2.4613e-83	0	Id2
3.74524e-83	0.358999	1	0.999	6.45641e-79	0	Xist
2.93058e-81	0.522129	0.726	0.424	5.05202e-77	0	Cdh11
2.59327e-79	0.503074	0.736	0.445	4.47054e-75	0	Clmp
3.87679e-79	0.561662	0.611	0.327	6.6832e-75	0	Wnt5a
4.68024e-73	0.773077	0.603	0.357	8.06827e-69	0	Trps1
6.81609e-73	0.539204	0.422	0.177	1.17503e-68	0	Pax3
3.99214e-71	0.472476	0.495	0.236	6.88205e-67	0	Hand2
6.94076e-70	0.624887	0.688	0.443	1.19652e-65	0	Mpped2
1.41544e-68	0.525293	0.964	0.865	2.44008e-64	0	Tsc22d1
3.57737e-65	0.446905	0.278	0.088	6.16703e-61	0	Alx1
3.63167e-65	0.477595	0.943	0.824	6.26063e-61	0	Chd3
9.73198e-60	0.468803	0.917	0.758	1.6777e-55	0	Sox11
1.76482e-58	0.4704	0.361	0.154	3.04238e-54	0	Runx2
6.41412e-58	0.631977	0.899	0.798	1.10573e-53	0	Tcf4
3.77581e-57	0.605651	0.729	0.556	6.50913e-53	0	Zfhx3
8.12806e-57	0.455229	0.868	0.732	1.4012e-52	0	Auts2
1.93662e-56	0.43953	0.891	0.699	3.33853e-52	0	Fstl1
2.735e-55	0.336053	0.423	0.197	4.71487e-51	0	Twist1
1.59421e-54	0.432444	0.658	0.423	2.74825e-50	0	Fgfr1
1.92582e-54	0.392165	0.629	0.384	3.31993e-50	0	Pth1r
8.91221e-54	0.328501	1	0.98	1.53638e-49	0	Mdk
8.80263e-53	0.392583	0.96	0.847	1.51749e-48	0	Igfbp4
1.48032e-52	0.407242	0.42	0.208	2.55192e-48	0	Gsc
4.96803e-51	0.550501	0.574	0.362	8.56439e-47	0	Osr2
5.72204e-51	0.566892	0.817	0.652	9.86422e-47	0	Cyr61
2.33057e-50	0.269661	0.998	0.996	4.01768e-46	0	Rbm39
2.53664e-50	0.308404	0.356	0.156	4.37292e-46	0	Dlx5
9.6165e-49	0.39205	0.506	0.283	1.65779e-44	0	Nkd1
3.78544e-48	0.315424	0.306	0.126	6.52572e-44	0	Lhx8
9.98416e-48	0.476975	0.66	0.443	1.72117e-43	0	Mef2c
4.99623e-47	0.391688	0.705	0.469	8.61299e-43	0	Cdo1
7.92543e-47	0.394282	0.99	0.921	1.36627e-42	0	Ptn
1.96151e-46	0.474115	0.512	0.301	3.38146e-42	0	Limch1
4.17711e-46	0.374732	0.517	0.302	7.20092e-42	0	Robo2
1.56229e-45	0.318464	0.363	0.172	2.69323e-41	0	Cped1
1.63918e-45	0.378903	0.772	0.563	2.82578e-41	0	Gm13305
1.7253e-43	0.333223	0.405	0.208	2.97424e-39	0	Mme
1.87253e-43	0.279983	0.328	0.148	3.22806e-39	0	Gm26523
2.28621e-43	0.369257	0.828	0.638	3.9412e-39	0	6330403K07Rik
4.45218e-43	0.418133	0.77	0.585	7.67511e-39	0	Fbn2
2.99007e-42	0.363703	0.764	0.57	5.15459e-38	0	Mfap4
5.70638e-41	0.465726	0.517	0.331	9.83723e-37	0	Bend5
2.41163e-40	0.397343	0.381	0.199	4.15741e-36	0	Rspo3
3.29573e-40	0.428532	0.619	0.431	5.68151e-36	0	Zfhx4
6.76717e-40	0.427889	0.671	0.493	1.16659e-35	0	Zeb2
2.80005e-39	0.424472	0.674	0.479	4.82701e-35	0	Twist2
5.71258e-39	0.31717	0.567	0.362	9.84792e-35	0	Nfic
7.83371e-39	0.333883	0.485	0.286	1.35045e-34	0	Fbln2
3.24191e-38	0.434638	0.336	0.172	5.58872e-34	0	Pantr1
6.56696e-38	0.270761	0.39	0.208	1.13208e-33	0	Nfatc4
8.79682e-38	0.335295	0.839	0.684	1.51648e-33	0	Eva1b
1.51387e-35	0.283698	0.478	0.282	2.60977e-31	0	Palld
3.34441e-35	0.337252	0.353	0.187	5.76542e-31	0	Slit2
1.73475e-34	0.309815	0.913	0.813	2.99053e-30	0	Gm1673
1.07332e-33	0.266169	0.986	0.955	1.85029e-29	0	Atxn7l3b
3.49716e-33	0.278994	0.39	0.222	6.02875e-29	0	Zfp521
9.59853e-33	0.42464	0.677	0.523	1.65469e-28	0	Nbl1
1.41719e-32	0.392451	0.794	0.674	2.44309e-28	0	Pbx1
2.16133e-32	0.298608	0.737	0.565	3.72592e-28	0	Smarca2
2.5003e-32	0.277349	0.409	0.237	4.31027e-28	0	Dclk1
2.53254e-32	0.289996	0.911	0.817	4.36584e-28	0	Serf1
3.66397e-31	0.379396	0.676	0.521	6.31633e-27	0	Col26a1
5.1181e-31	0.267758	0.314	0.162	8.82309e-27	0	Col23a1
8.23194e-31	0.271875	0.293	0.147	1.4191e-26	0	Pcdh10
1.47597e-30	0.312013	0.635	0.461	2.54442e-26	0	Serpine2
6.71496e-30	0.428178	0.775	0.648	1.15759e-25	0	Id1
8.85165e-30	0.279282	0.372	0.212	1.52594e-25	0	Tmem132c
1.28818e-29	0.354002	0.855	0.749	2.2207e-25	0	H1f0
1.52853e-29	0.297482	0.519	0.346	2.63503e-25	0	Gxylt2
2.19806e-29	0.548078	0.337	0.195	3.78923e-25	0	Stmn2
3.76715e-29	0.281443	0.753	0.582	6.49418e-25	0	Snhg18
3.7841e-29	0.254169	0.955	0.856	6.52342e-25	0	Cald1
3.83336e-29	0.30442	0.632	0.463	6.60833e-25	0	Nfix
8.23396e-29	0.298992	0.625	0.456	1.41945e-24	0	Lpar1
1.55857e-28	0.339751	0.47	0.31	2.68681e-24	0	Epha4
2.97556e-28	0.311305	0.335	0.188	5.12956e-24	0	Bmp4
5.46136e-28	0.298474	0.534	0.364	9.41484e-24	0	Prkcdbp
2.093e-27	0.25808	0.408	0.25	3.60812e-23	0	Dnm3os
2.26967e-27	0.277033	0.421	0.258	3.91269e-23	0	Lef1
4.19215e-27	0.401046	0.454	0.29	7.22685e-23	0	Dkk2
5.91221e-27	0.261577	0.501	0.33	1.01921e-22	0	Pdgfra
6.24912e-27	0.274064	0.509	0.341	1.07729e-22	0	Il11ra1
9.26861e-27	0.27284	0.52	0.357	1.59782e-22	0	Mmp2
1.85082e-26	0.284958	0.885	0.77	3.19063e-22	0	Btg1
5.70197e-26	0.271323	0.569	0.408	9.82963e-22	0	Timp3
1.65284e-25	0.302808	0.81	0.713	2.84933e-21	0	Nnat
2.58395e-25	0.266124	0.867	0.782	4.45447e-21	0	Eid1
3.41712e-24	0.273355	0.734	0.599	5.89078e-20	0	Basp1
3.81937e-24	0.256963	0.621	0.466	6.58421e-20	0	Kifap3
2.75358e-23	0.301544	0.771	0.64	4.7469e-19	0	Csrp2
5.24306e-23	0.404127	0.739	0.634	9.03852e-19	0	Vcan
8.53216e-23	0.280345	0.553	0.404	1.47086e-18	0	Plpp3
9.73301e-23	0.250801	0.804	0.699	1.67787e-18	0	Ap3s1
1.96357e-22	0.26525	0.533	0.385	3.385e-18	0	Gpc6
4.1155e-22	0.338403	0.642	0.498	7.0947e-18	0	Ebf1
1.38563e-21	0.288598	0.617	0.481	2.38868e-17	0	Efna5
1.42197e-21	0.255125	0.277	0.156	2.45133e-17	0	a
1.48362e-20	0.256811	0.591	0.45	2.55761e-16	0	Ccdc88a
1.65891e-20	0.256126	0.665	0.531	2.8598e-16	0	Ssbp2
2.01641e-20	0.26847	0.742	0.643	3.47609e-16	0	Tia1
1.5518e-19	0.254731	0.697	0.573	2.67514e-15	0	Lmna
7.12061e-19	0.275737	0.619	0.487	1.22752e-14	0	Crabp2
9.83346e-19	0.358357	0.359	0.24	1.69519e-14	0	Penk
3.22618e-18	0.286966	0.931	0.858	5.56161e-14	0	Id3
5.69656e-17	0.252857	0.694	0.586	9.82029e-13	0	Ppp3ca
4.56601e-16	0.28448	0.616	0.5	7.87134e-12	0	Osr1
1.28506e-15	0.278026	0.442	0.327	2.21532e-11	0	Slc1a3
7.53121e-13	0.294428	0.528	0.423	1.2983e-08	0	Sostdc1
0.00942893	0.265407	0.613	0.612	1	0	Meis2
0	1.74788	1	0.857	0	1	Dlk1
9.37856e-270	1.24654	1	0.993	1.61677e-265	1	Meg3
6.15181e-230	1.22088	0.999	0.837	1.06051e-225	1	Col3a1
7.25195e-212	1.02436	1	0.847	1.25016e-207	1	Col1a2
5.12116e-194	1.16922	0.951	0.688	8.82837e-190	1	Plagl1
9.16061e-193	1.30839	1	0.922	1.5792e-188	1	Ptn
1.84394e-186	1.07944	0.681	0.234	3.17876e-182	1	Agtr2
1.00471e-185	0.949341	0.997	0.858	1.73203e-181	1	Mest
7.3833e-174	0.798744	1	0.919	1.27281e-169	1	Igf2
2.34596e-157	1.37946	0.872	0.533	4.0442e-153	1	Sfrp2
9.91895e-157	0.829781	1	0.975	1.70993e-152	1	Cdkn1c
5.77881e-153	1.05466	0.865	0.573	9.9621e-149	1	Tshz2
7.06543e-150	0.843866	0.988	0.923	1.21801e-145	1	Gnas
5.02405e-143	0.836034	0.576	0.195	8.66096e-139	1	Angptl1
1.38129e-142	0.721876	0.994	0.805	2.38121e-138	1	Col1a1
1.12923e-140	1.23419	0.888	0.594	1.94667e-136	1	Dcn
1.74256e-139	0.817788	0.989	0.851	3.004e-135	1	Peg3
1.34535e-136	0.618577	1	0.981	2.31926e-132	1	Mdk
1.29829e-129	0.904826	0.638	0.265	2.23812e-125	1	Ogn
1.41397e-129	1.18983	0.798	0.47	2.43755e-125	1	Igf1
2.11263e-129	0.842586	0.998	0.947	3.64197e-125	1	Sparc
3.67038e-119	0.742672	0.975	0.849	6.32736e-115	1	Igfbp4
8.60106e-117	0.553866	1	1	1.48274e-112	1	Lgals1
3.99672e-115	0.59773	0.992	0.91	6.88994e-111	1	Rrbp1
6.71425e-114	0.716263	0.9	0.633	1.15747e-109	1	6330403K07Rik
1.0158e-111	0.681045	0.948	0.697	1.75113e-107	1	Fstl1
6.3242e-106	0.890527	0.698	0.368	1.09023e-101	1	Postn
2.9304e-105	0.820822	0.811	0.52	5.05171e-101	1	Ndn
1.41732e-103	0.732737	0.576	0.245	2.44331e-99	1	Akap12
1.14082e-101	0.777177	0.878	0.63	1.96665e-97	1	Gpc3
6.40944e-101	0.799221	0.78	0.49	1.10492e-96	1	Fn1
1.68306e-100	1.11146	0.733	0.435	2.90142e-96	1	Cxcl12
1.1677e-98	0.713267	0.705	0.358	2.01299e-94	1	Nrk
3.41549e-98	0.576477	0.587	0.252	5.88797e-94	1	Hic1
3.74819e-94	0.4858	1	0.993	6.4615e-90	1	H19
1.29277e-91	0.835327	0.933	0.753	2.2286e-87	1	Itm2a
1.21231e-88	0.629693	0.818	0.529	2.0899e-84	1	Col5a2
4.01455e-88	0.624084	0.968	0.841	6.92068e-84	1	Mfap2
1.43353e-84	0.760561	0.612	0.305	2.47126e-80	1	Fibin
3.22424e-84	0.679148	0.673	0.365	5.55827e-80	1	Creb5
1.93618e-83	0.567696	0.307	0.082	3.33779e-79	1	Mfap5
2.59954e-82	0.773995	0.778	0.477	4.48135e-78	1	Ebf1
8.25842e-82	0.564463	0.963	0.855	1.42367e-77	1	Grb10
1.94371e-80	0.437697	0.44	0.162	3.35076e-76	1	Islr
1.42144e-79	1.15031	0.492	0.225	2.45043e-75	1	Aspn
7.88732e-79	0.416057	0.393	0.134	1.35969e-74	1	Rarres2
2.37248e-78	0.409823	0.283	0.072	4.08992e-74	1	Tmeff2
5.36915e-75	0.30011	1	1	9.25587e-71	1	Serf2
1.07272e-74	0.512996	0.999	0.946	1.84926e-70	1	Serpinh1
1.49599e-73	0.574715	0.739	0.45	2.57894e-69	1	Col6a1
2.51289e-72	0.375369	1	1	4.33198e-68	1	Tmsb10
1.24641e-71	0.653897	0.823	0.608	2.14868e-67	1	Maged2
7.2196e-71	0.477279	0.959	0.896	1.24459e-66	1	Arf4
3.08219e-69	0.576917	0.836	0.622	5.31338e-65	1	Selm
7.05635e-69	0.562805	0.69	0.416	1.21644e-64	1	Ly6h
4.77405e-68	0.495737	0.944	0.81	8.22999e-64	1	Nfib
8.89303e-68	0.551725	0.752	0.496	1.53307e-63	1	Col6a2
7.9958e-65	0.465305	0.394	0.155	1.3784e-60	1	Ntrk2
1.42006e-64	0.638936	0.815	0.637	2.44805e-60	1	Rcn3
2.88366e-64	0.491336	0.994	0.907	4.97114e-60	1	Marcks
4.56804e-64	0.411941	0.357	0.13	7.87484e-60	1	Ntm
4.61913e-64	0.45705	0.949	0.848	7.96292e-60	1	Map1lc3a
9.73158e-64	0.54186	0.557	0.277	1.67763e-59	1	Dkk2
1.23467e-63	0.795523	0.769	0.578	2.12844e-59	1	Mfap4
1.99109e-63	0.598367	0.739	0.481	3.43243e-59	1	Osr1
4.90886e-61	0.598922	0.751	0.512	8.46239e-57	1	Map1b
7.291e-61	0.274382	1	1	1.2569e-56	1	Sec61g
1.39265e-60	0.431636	0.484	0.227	2.40079e-56	1	Lhfpl2
3.27073e-59	0.393229	0.998	0.994	5.63841e-55	1	Sub1
5.59217e-59	0.447037	0.462	0.22	9.64034e-55	1	Lrrc17
1.26512e-58	0.381403	0.999	0.984	2.18094e-54	1	Ifitm2
4.12806e-58	0.518353	0.802	0.588	7.11637e-54	1	Fbn2
2.63337e-57	0.723905	0.747	0.516	4.53967e-53	1	Lum
1.27417e-56	0.433201	0.948	0.858	2.19655e-52	1	Cd81
8.912e-56	0.425578	0.578	0.318	1.53634e-51	1	Bicc1
3.81516e-55	0.409133	0.462	0.223	6.57696e-51	1	AW551984
1.3759e-54	0.453694	0.92	0.815	2.37192e-50	1	Nenf
3.90457e-54	0.515744	0.672	0.429	6.73109e-50	1	Zfhx4
5.72734e-54	0.463548	0.625	0.373	9.87336e-50	1	Col5a1
1.02902e-53	0.497539	0.685	0.434	1.77394e-49	1	Col6a3
1.10804e-53	0.425449	0.958	0.881	1.91016e-49	1	Laptm4a
4.47131e-53	0.500551	0.895	0.763	7.70809e-49	1	Kcnq1ot1
4.71462e-51	0.422016	0.362	0.154	8.12753e-47	1	Abi3bp
8.38728e-51	0.450669	0.579	0.341	1.44588e-46	1	Trio
1.11376e-50	0.36205	0.985	0.943	1.92001e-46	1	Krtcap2
6.83316e-50	0.497378	0.83	0.66	1.17797e-45	1	Rbp1
1.39982e-49	0.374548	0.434	0.208	2.41315e-45	1	Nid1
2.88312e-49	0.438957	0.796	0.569	4.97021e-45	1	Gm13305
1.21623e-48	0.357408	0.277	0.1	2.09665e-44	1	Ebf2
1.52599e-48	0.462067	0.848	0.698	2.63066e-44	1	Maged1
4.04537e-48	0.337004	0.376	0.166	6.97382e-44	1	Ccdc80
1.46244e-47	0.426493	0.44	0.222	2.5211e-43	1	Amot
1.39389e-46	0.292772	0.261	0.092	2.40293e-42	1	Fgf7
2.54928e-46	0.421755	0.369	0.168	4.39471e-42	1	Gdf10
4.87574e-46	0.503486	0.522	0.299	8.40529e-42	1	Smoc2
1.40946e-45	0.475971	0.702	0.482	2.42977e-41	1	Cdo1
2.61254e-45	0.479463	0.967	0.925	4.50376e-41	1	Cd63
3.00703e-45	0.35011	0.33	0.14	5.18382e-41	1	Adam33
3.76204e-45	0.355988	0.383	0.176	6.48538e-41	1	Zcchc5
4.32768e-44	0.429172	0.778	0.597	7.46049e-40	1	Basp1
7.42882e-44	0.408595	0.513	0.289	1.28065e-39	1	Lox
1.26537e-43	0.378841	0.564	0.325	2.18138e-39	1	Pdgfra
2.62621e-43	0.385771	0.429	0.22	4.52732e-39	1	Ank2
3.55998e-43	0.331681	0.27	0.103	6.13706e-39	1	Atp1b1
5.83487e-42	0.439717	0.711	0.496	1.00587e-37	1	Gas1
6.26843e-42	0.330084	1	1	1.08061e-37	1	Malat1
7.74089e-42	0.467244	0.612	0.399	1.33445e-37	1	Sfrp1
9.75602e-42	0.368103	0.557	0.334	1.68184e-37	1	Igf2r
1.81287e-41	0.379103	0.908	0.819	3.1252e-37	1	Gm1673
4.24502e-41	0.399837	0.688	0.485	7.31799e-37	1	Vkorc1
2.7818e-40	0.416463	0.673	0.476	4.79554e-36	1	Rbms3
8.19196e-40	0.365466	0.738	0.531	1.41221e-35	1	Pofut2
1.39617e-39	0.424541	0.708	0.54	2.40686e-35	1	Tmed3
1.95886e-39	0.405015	0.71	0.519	3.37688e-35	1	Thra
2.28759e-39	0.400094	0.528	0.328	3.94358e-35	1	Fbn1
2.93319e-39	0.407905	0.746	0.572	5.05653e-35	1	Smarca2
4.20281e-39	0.404791	0.537	0.324	7.24522e-35	1	Glipr2
1.03724e-38	0.362069	0.485	0.276	1.7881e-34	1	Kdelr3
3.25819e-38	0.487761	0.532	0.334	5.61679e-34	1	Flrt2
5.72943e-38	0.377685	0.988	0.921	9.87696e-34	1	Vim
5.99484e-38	0.443015	0.605	0.4	1.03345e-33	1	Plpp3
6.58305e-38	0.306757	0.26	0.105	1.13485e-33	1	Pcdh19
1.61557e-37	0.332078	0.956	0.891	2.78509e-33	1	Ttc3
1.68284e-37	0.282399	0.331	0.153	2.90104e-33	1	Zim1
2.3361e-37	0.350412	0.354	0.173	4.0272e-33	1	Kitl
5.23858e-37	0.391152	0.862	0.667	9.03079e-33	1	Prrx1
7.38067e-37	0.414887	0.548	0.344	1.27235e-32	1	Eln
1.01985e-36	0.446236	0.493	0.294	1.75813e-32	1	Shox2
2.40266e-36	0.326545	0.358	0.178	4.14195e-32	1	Peg10
3.45417e-36	0.465302	0.671	0.506	5.95465e-32	1	Tcf7l2
4.75097e-36	0.388231	0.419	0.23	8.19019e-32	1	Filip1l
7.67333e-36	0.389002	0.536	0.346	1.3228e-31	1	Tpst1
8.73786e-36	0.364517	0.431	0.236	1.50632e-31	1	Egfl6
1.00017e-35	0.332683	0.521	0.312	1.72419e-31	1	Ddr2
3.78504e-35	0.331817	0.858	0.688	6.52503e-31	1	Eva1b
4.72494e-35	0.354899	0.92	0.831	8.14532e-31	1	Selk
6.3106e-35	0.361282	0.666	0.464	1.08788e-30	1	Nfix
9.24361e-35	0.39912	0.433	0.243	1.59351e-30	1	Epha3
1.12937e-34	0.389738	0.671	0.491	1.94692e-30	1	Copz2
1.6033e-34	0.418762	0.769	0.62	2.76393e-30	1	Celf2
2.56072e-34	0.330862	0.427	0.242	4.41442e-30	1	Npdc1
2.60798e-34	0.492016	0.95	0.902	4.49589e-30	1	Tpm1
3.06641e-34	0.305789	0.423	0.234	5.28618e-30	1	Cd248
3.67756e-34	0.298925	0.364	0.183	6.33975e-30	1	Vcam1
6.1157e-34	0.493456	0.475	0.29	1.05429e-29	1	Cthrc1
1.03372e-33	0.280101	0.315	0.149	1.78202e-29	1	Piezo2
1.29315e-33	0.373978	0.648	0.46	2.22927e-29	1	Lpar1
1.38148e-33	0.331159	0.961	0.931	2.38154e-29	1	Sfr1
2.13967e-33	0.256725	1	1	3.68857e-29	1	Ubb
3.53187e-33	0.346799	0.673	0.472	6.0886e-29	1	Clmp
4.07472e-33	0.301919	0.41	0.223	7.02441e-29	1	Loxl2
4.66131e-33	0.304524	0.997	0.987	8.03562e-29	1	Myl6
1.01615e-32	0.307512	0.366	0.194	1.75175e-28	1	Thbs1
1.17437e-32	0.379066	0.612	0.426	2.02449e-28	1	Ptprd
1.5165e-32	0.328106	0.871	0.786	2.6143e-28	1	Eid1
1.73185e-32	0.347601	0.757	0.59	2.98553e-28	1	Snhg18
1.78648e-32	0.330776	0.948	0.863	3.07971e-28	1	Cald1
1.22427e-31	0.347459	0.964	0.888	2.11052e-27	1	Tuba1a
1.40335e-31	0.314277	0.392	0.217	2.41923e-27	1	Tmem26
2.10582e-31	0.367683	0.517	0.337	3.63022e-27	1	Sulf2
3.35106e-31	0.376351	0.761	0.63	5.77689e-27	1	Rhoc
3.64835e-31	0.299664	0.975	0.928	6.2894e-27	1	Fus
9.94825e-31	0.261819	0.808	0.632	1.71498e-26	1	Nfia
1.27395e-30	0.428218	0.772	0.646	2.19617e-26	1	Csrp2
2.79346e-30	0.280326	0.345	0.181	4.81565e-26	1	Ifi27
5.72534e-30	0.360077	0.621	0.437	9.86991e-26	1	Pmp22
7.76117e-30	0.333231	0.59	0.394	1.33795e-25	1	Kctd12
1.32789e-29	0.318984	0.503	0.318	2.28915e-25	1	Clcn5
1.49838e-29	0.391754	0.919	0.89	2.58306e-25	1	Sf3b5
1.5547e-29	0.299169	0.902	0.815	2.68015e-25	1	Rsrp1
1.58861e-29	0.333593	0.402	0.23	2.73861e-25	1	Sulf1
2.18018e-29	0.305122	0.53	0.344	3.75841e-25	1	Il11ra1
2.34342e-29	0.339072	0.404	0.232	4.03981e-25	1	Wisp1
2.46179e-29	0.314462	0.652	0.454	4.24389e-25	1	Cdh11
3.03461e-29	0.2672	0.988	0.956	5.23136e-25	1	Atxn7l3b
4.54931e-29	0.414737	0.512	0.337	7.84256e-25	1	Col12a1
9.00717e-29	0.308811	0.914	0.861	1.55275e-24	1	Ssr2
6.53179e-28	0.355561	0.796	0.675	1.12602e-23	1	Jund
6.77916e-28	0.3028	0.411	0.247	1.16866e-23	1	Fkbp7
1.20971e-27	0.291368	0.383	0.218	2.08543e-23	1	Ldb2
2.34723e-27	0.331155	0.821	0.73	4.04639e-23	1	Sec62
1.07834e-26	0.302673	0.844	0.765	1.85895e-22	1	Dpm3
1.73372e-26	0.291721	0.637	0.466	2.98876e-22	1	Efemp2
2.10141e-26	0.307727	0.318	0.17	3.62261e-22	1	Fbln5
3.75469e-26	0.267433	0.338	0.186	6.47271e-22	1	Loxl1
5.52457e-26	0.289608	0.427	0.265	9.5238e-22	1	Axl
4.40846e-25	0.323774	0.642	0.493	7.59974e-21	1	Txndc5
6.56535e-25	0.269909	0.337	0.19	1.1318e-20	1	Man2a1
9.05383e-25	0.255894	0.453	0.288	1.56079e-20	1	Fndc3b
9.24134e-25	0.324669	0.701	0.573	1.59311e-20	1	Tmem165
1.19448e-24	0.318983	0.593	0.433	2.05916e-20	1	Timp2
1.35294e-24	0.34577	0.363	0.209	2.33233e-20	1	Barx1
1.70918e-24	0.301769	0.674	0.519	2.94646e-20	1	Yipf5
2.00647e-24	0.273003	0.364	0.214	3.45896e-20	1	Airn
2.33956e-24	0.310693	0.54	0.378	4.03317e-20	1	Myl9
2.45296e-24	0.283341	0.529	0.364	4.22865e-20	1	Epb41l3
2.48716e-24	0.262205	0.288	0.15	4.28762e-20	1	Tbx18
3.31557e-24	0.301866	0.642	0.482	5.71571e-20	1	Ckap4
4.61912e-24	0.322903	0.799	0.691	7.9629e-20	1	Gstm5
5.28532e-24	0.254351	0.282	0.148	9.11136e-20	1	Ebf3
6.56923e-24	0.323342	0.714	0.573	1.13247e-19	1	Spats2l
8.3233e-24	0.321408	0.647	0.488	1.43485e-19	1	Crabp2
1.85482e-23	0.306917	0.666	0.482	3.19752e-19	1	Nrp1
1.93431e-23	0.280807	0.846	0.723	3.33456e-19	1	Ddah2
2.49746e-23	0.322972	0.79	0.65	4.30538e-19	1	Bgn
3.54936e-23	0.253842	0.942	0.903	6.11874e-19	1	Gnb2
6.9134e-23	0.299297	0.802	0.705	1.1918e-18	1	Ap3s1
9.50318e-23	0.253178	0.403	0.249	1.63825e-18	1	Cdon
1.01636e-22	0.328493	0.441	0.293	1.7521e-18	1	Gsn
1.06809e-22	0.256646	0.415	0.26	1.84128e-18	1	Serpinf1
1.44207e-22	0.349736	0.613	0.471	2.48599e-18	1	Fxyd6
1.6147e-22	0.257132	0.439	0.282	2.78357e-18	1	Ghr
1.69774e-22	0.2774	0.868	0.799	2.92673e-18	1	Aes
1.71579e-22	0.341589	0.641	0.513	2.95785e-18	1	Sptbn1
2.14353e-22	0.286898	0.802	0.698	3.69524e-18	1	Ift20
3.83896e-22	0.304371	0.794	0.68	6.61799e-18	1	Pbx1
6.62166e-22	0.264718	0.818	0.734	1.14151e-17	1	Capns1
7.0251e-22	0.270324	0.513	0.358	1.21106e-17	1	Lrp1
7.06167e-22	0.279871	0.288	0.158	1.21736e-17	1	Sema3c
1.63277e-21	0.298242	0.64	0.495	2.81473e-17	1	Gpx8
2.89837e-21	0.271023	0.472	0.322	4.9965e-17	1	C1qtnf4
3.70563e-21	0.281798	0.769	0.67	6.38813e-17	1	Bcl7c
7.00836e-21	0.256137	0.871	0.814	1.20817e-16	1	Rab2a
7.70085e-21	0.263146	0.334	0.197	1.32755e-16	1	C1qtnf2
1.11833e-20	0.372998	0.383	0.243	1.92789e-16	1	Rgcc
1.13477e-20	0.252468	0.468	0.316	1.95622e-16	1	Klf7
1.95622e-20	0.254497	0.46	0.311	3.37232e-16	1	Zeb1
1.4492e-19	0.272213	0.632	0.499	2.49827e-15	1	Copa
2.39286e-19	0.278916	0.895	0.851	4.12505e-15	1	Ppib
3.12471e-19	0.324658	0.477	0.349	5.38668e-15	1	Efnb1
1.14774e-18	0.280518	0.713	0.605	1.97859e-14	1	Ahnak
1.22506e-17	0.252904	0.492	0.354	2.11188e-13	1	Dpysl3
1.29199e-17	0.262449	0.374	0.247	2.22726e-13	1	Tgfb1i1
1.31941e-17	0.272058	0.605	0.471	2.27452e-13	1	Zyx
1.45029e-17	0.360852	0.58	0.449	2.50016e-13	1	Klf4
1.93978e-17	0.26238	0.807	0.702	3.34399e-13	1	Rcn1
2.1834e-17	0.267727	0.4	0.269	3.76397e-13	1	Pcolce
2.98046e-17	0.2834	0.448	0.313	5.13801e-13	1	Rhoj
3.37558e-17	0.250325	0.5	0.358	5.81916e-13	1	Gxylt2
7.10316e-17	0.298575	0.327	0.207	1.22451e-12	1	Col14a1
7.34351e-17	0.255079	0.751	0.666	1.26595e-12	1	Nktr
8.41738e-17	0.261545	0.417	0.29	1.45107e-12	1	Gap43
1.40384e-16	0.266341	0.641	0.533	2.42008e-12	1	Rcn2
1.57548e-16	0.29788	0.857	0.804	2.71598e-12	1	Hspa5
4.02646e-16	0.256103	0.472	0.343	6.94121e-12	1	Sema5a
4.6375e-16	0.290741	0.266	0.159	7.99459e-12	1	Gas2
4.06668e-15	0.322541	0.616	0.526	7.01055e-11	1	Fbln1
9.12982e-15	0.312374	0.814	0.775	1.57389e-10	1	Pdia6
1.08522e-14	0.366269	0.561	0.449	1.87081e-10	1	S100a6
1.15147e-14	0.313666	0.453	0.33	1.98502e-10	1	Slc1a3
3.62068e-14	0.26018	0.8	0.726	6.24169e-10	1	Manf
5.65667e-14	0.276863	0.382	0.267	9.75153e-10	1	Socs2
9.12808e-14	0.250387	0.586	0.477	1.57359e-09	1	Tmem9
3.18038e-13	0.303439	0.65	0.558	5.48266e-09	1	Klf6
5.97734e-13	0.288355	0.289	0.19	1.03043e-08	1	Tmem100
0	2.43154	0.953	0.214	0	2	Tnnt1
0	1.94802	0.659	0.065	0	2	Msc
0	1.57062	0.623	0.038	0	2	Ttn
0	1.35695	0.73	0.073	0	2	Des
0	1.2905	0.621	0.026	0	2	Myod1
0	1.26384	0.769	0.06	0	2	Fitm1
0	1.17415	0.57	0.024	0	2	Neb
0	0.881613	0.576	0.025	0	2	Ank1
0	0.860712	0.581	0.025	0	2	Pitx3
0	0.8445	0.53	0.043	0	2	Cdh15
0	0.769562	0.424	0.019	0	2	Arpp21
2.27167e-305	2.40975	0.903	0.273	3.91613e-301	2	Acta2
1.69984e-269	0.680808	0.364	0.015	2.93036e-265	2	Rbm24
1.08211e-262	0.909311	0.408	0.026	1.86544e-258	2	Vgll2
7.57118e-253	0.894655	0.583	0.078	1.3052e-248	2	Nexn
1.59272e-243	0.516331	0.306	0.009	2.7457e-239	2	Pax7
5.88317e-228	0.671041	0.468	0.05	1.0142e-223	2	Rtn2
2.22781e-227	3.42298	0.847	0.343	3.84053e-223	2	Actc1
2.63572e-225	0.479453	0.279	0.008	4.54373e-221	2	Myf5
2.57686e-209	0.632697	0.299	0.014	4.44225e-205	2	Chrna1
4.04191e-198	0.455083	0.339	0.024	6.96785e-194	2	Rapsn
9.55144e-198	0.905552	0.667	0.15	1.64657e-193	2	Tppp3
3.87886e-193	0.357136	0.253	0.009	6.68677e-189	2	Fgfr4
3.33987e-187	0.810973	0.532	0.09	5.7576e-183	2	Pitx2
2.43497e-185	1.18346	0.916	0.477	4.19765e-181	2	Ppp1r14b
2.27485e-162	0.522916	0.353	0.038	3.92162e-158	2	Isl1
3.56238e-162	0.450032	0.342	0.036	6.14119e-158	2	Rragd
1.6675e-160	1.15196	0.709	0.241	2.8746e-156	2	Hes6
2.00272e-160	0.437654	0.324	0.031	3.45248e-156	2	Sytl2
7.60435e-158	2.79779	0.55	0.138	1.31091e-153	2	Myog
8.6878e-155	1.33588	0.359	0.047	1.49769e-150	2	Gm7325
2.16319e-153	0.441787	0.299	0.027	3.72912e-149	2	Ccdc141
2.96673e-152	0.614441	1	1	5.11435e-148	2	Cox8a
7.77213e-150	0.763378	0.539	0.125	1.33984e-145	2	Cep41
5.26953e-147	0.500409	1	1	9.08414e-143	2	Rps2
5.92895e-146	0.68776	0.581	0.143	1.02209e-141	2	Parm1
8.94261e-141	0.686752	0.437	0.081	1.54162e-136	2	Kcne1l
5.79672e-140	0.403984	0.306	0.033	9.99297e-136	2	Megf10
4.82044e-137	0.337207	1	1	8.30996e-133	2	Rpl26
6.34956e-134	0.629605	1	1	1.0946e-129	2	Npm1
2.32516e-130	0.416838	1	1	4.00835e-126	2	Rpl4
5.95525e-129	1.00684	0.927	0.605	1.02663e-124	2	Tubb2b
1.27118e-124	0.322278	1	1	2.19138e-120	2	Rpl32
1.36459e-124	0.54948	1	1	2.35241e-120	2	Hsp90ab1
1.68669e-124	0.543875	0.421	0.081	2.90769e-120	2	Lrrn1
2.08821e-124	0.337871	1	1	3.59987e-120	2	Rpl37
3.78931e-121	0.328493	1	1	6.5324e-117	2	Rpl18a
1.77155e-119	0.422444	0.284	0.035	3.05397e-115	2	Jsrp1
9.45286e-119	0.350832	1	1	1.62958e-114	2	Rpl10a
1.60684e-118	0.96324	0.976	0.761	2.77004e-114	2	Itm2a
2.09276e-118	0.897169	0.876	0.525	3.60771e-114	2	Pcbp4
2.22079e-117	0.395107	1	1	3.82842e-113	2	Rpl3
1.87258e-116	0.895082	0.446	0.101	3.22814e-112	2	Cryab
1.49624e-115	0.454712	0.333	0.052	2.57936e-111	2	Gatm
1.83074e-115	0.290585	1	1	3.15601e-111	2	Rpl14
1.97841e-114	1.11221	0.865	0.512	3.41058e-110	2	Sh3glb1
8.13684e-113	0.841992	0.787	0.392	1.40271e-108	2	Hspb1
1.0011e-111	0.331558	1	1	1.72579e-107	2	Rpl19
3.16431e-108	0.703616	1	0.999	5.45496e-104	2	Gapdh
7.44043e-108	0.503193	0.417	0.093	1.28266e-103	2	Fbxo17
1.12791e-107	0.333291	1	1	1.94441e-103	2	Rps18
1.15019e-107	0.489571	0.33	0.056	1.98282e-103	2	Pnmal2
1.16026e-106	0.311471	1	1	2.00017e-102	2	Rplp1
2.84856e-106	0.298311	1	1	4.91064e-102	2	Rpl11
5.85348e-106	0.492389	0.313	0.049	1.00908e-101	2	Car3
3.70409e-103	0.834891	0.772	0.397	6.38549e-99	2	Pdlim4
1.41816e-100	0.341704	1	1	2.44477e-96	2	Rpl18
4.56334e-100	0.434501	0.277	0.041	7.86674e-96	2	Rgs16
1.69668e-99	0.763124	0.741	0.355	2.9249e-95	2	Hacd1
2.56055e-99	0.31375	1	1	4.41412e-95	2	Rpl36
4.06315e-98	0.598638	1	0.998	7.00446e-94	2	Hspe1
1.35584e-96	0.27296	1	1	2.33734e-92	2	Rps16
1.56586e-96	0.703907	0.494	0.151	2.69939e-92	2	Nes
2.3141e-96	0.264148	1	1	3.98928e-92	2	Rps27a
2.76058e-96	0.439448	1	1	4.75897e-92	2	Rpl7a
2.98131e-96	0.681629	0.832	0.379	5.13948e-92	2	Pdgfa
1.17502e-95	0.332681	1	1	2.02562e-91	2	Tmsb4x
1.23057e-95	0.290851	1	1	2.12138e-91	2	Rpl27a
2.08778e-95	0.325933	1	1	3.59913e-91	2	Rps12
5.1054e-95	0.338515	1	1	8.8012e-91	2	Rps25
1.55358e-94	0.253195	1	1	2.67821e-90	2	Rpl41
1.72693e-94	0.259601	1	1	2.97705e-90	2	Rps23
9.37574e-94	1.37209	0.361	0.083	1.61628e-89	2	Tnnt2
2.55922e-91	0.778148	0.785	0.43	4.41183e-87	2	Pdlim7
6.75433e-88	1.63068	0.82	0.55	1.16438e-83	2	Tpm2
1.05019e-87	0.851396	0.985	0.899	1.81042e-83	2	Lsm6
5.14368e-86	0.695191	0.98	0.831	8.8672e-82	2	Hspd1
6.71504e-86	0.420974	0.384	0.093	1.15761e-81	2	Itga4
7.84556e-86	0.266747	1	1	1.3525e-81	2	Rps15
1.50055e-85	0.293615	1	1	2.58679e-81	2	Rpsa
1.31507e-84	0.65266	0.781	0.375	2.26705e-80	2	Nrk
1.21209e-83	0.69542	0.922	0.688	2.08952e-79	2	Cct2
2.62972e-82	0.340571	1	1	4.53338e-78	2	Gm10260
1.11391e-81	0.262149	1	1	1.92027e-77	2	Rpl35a
1.92867e-81	0.461706	0.464	0.142	3.32483e-77	2	Chd7
3.17359e-81	0.417768	1	1	5.47094e-77	2	Cox7c
5.00782e-81	0.410754	0.339	0.079	8.63299e-77	2	Edn3
6.58418e-81	0.273289	1	1	1.13505e-76	2	Rpl6
2.28038e-79	0.73086	0.962	0.762	3.93114e-75	2	Eno1
3.90525e-78	1.15514	0.996	0.977	6.73226e-74	2	Cdkn1c
1.17426e-77	0.82186	0.889	0.68	2.02431e-73	2	Abracl
1.88374e-77	0.382211	0.346	0.084	3.24739e-73	2	Plxna2
3.20565e-77	0.479495	0.311	0.071	5.52621e-73	2	Iffo1
3.55341e-77	0.343797	1	1	6.12572e-73	2	Rpl12
4.01254e-77	0.340801	0.282	0.055	6.91722e-73	2	Tm6sf1
5.0023e-77	0.584415	0.681	0.327	8.62347e-73	2	Fam178a
8.91942e-77	0.278749	1	1	1.53762e-72	2	Rps6
9.13424e-77	0.771089	0.608	0.273	1.57465e-72	2	Ccne1
4.10716e-75	0.435729	1	0.998	7.08033e-71	2	Hnrnpa1
8.06481e-73	0.540639	0.51	0.183	1.39029e-68	2	Lix1
1.22189e-72	0.506908	0.59	0.241	2.10642e-68	2	Efhd2
2.01965e-72	0.27173	1	1	3.48168e-68	2	Rps3
2.56825e-72	0.480628	0.373	0.104	4.42741e-68	2	Tagln
5.03028e-72	0.648027	0.933	0.692	8.67169e-68	2	C1qbp
5.14742e-72	0.668478	0.967	0.869	8.87364e-68	2	Aldoa
3.79508e-69	0.441206	1	0.992	6.54234e-65	2	Atp5g2
2.72051e-68	0.648167	0.867	0.619	4.68988e-64	2	Naa50
3.46728e-68	0.356904	0.301	0.072	5.97724e-64	2	Ppp1r14a
2.77498e-65	0.491103	0.266	0.059	4.78379e-61	2	Tnni2
3.63477e-65	0.298579	0.268	0.059	6.26597e-61	2	Spsb4
6.33712e-65	0.630855	0.898	0.616	1.09246e-60	2	Celf2
1.35673e-64	0.469689	1	0.995	2.33888e-60	2	Serbp1
3.73512e-64	0.261051	1	1	6.43897e-60	2	Rpl17
3.79332e-64	0.390796	1	0.999	6.53931e-60	2	Ybx1
1.7376e-63	1.36866	0.703	0.453	2.99544e-59	2	Spg21
3.56645e-63	0.593604	0.976	0.883	6.14821e-59	2	Cycs
4.90738e-63	0.681017	0.794	0.525	8.45984e-59	2	Pkig
1.48292e-62	0.567907	1	0.987	2.5564e-58	2	Tuba1b
4.03661e-62	0.502655	1	1	6.95872e-58	2	Hspa8
3.02545e-61	0.582706	0.505	0.213	5.21557e-57	2	Jam3
1.18236e-60	0.308605	1	1	2.03828e-56	2	Eef1g
1.2446e-60	0.368048	0.253	0.058	2.14556e-56	2	Cdk5r1
1.4577e-60	0.623477	0.989	0.901	2.51293e-56	2	Tpm1
9.01526e-60	1.374	0.439	0.174	1.55414e-55	2	Myl4
9.51143e-60	0.611317	0.896	0.67	1.63968e-55	2	Lyar
5.42373e-59	0.462573	0.324	0.096	9.34996e-55	2	Fndc5
1.11495e-58	0.375742	1	0.999	1.92207e-54	2	Eef2
1.60183e-58	0.582113	0.933	0.738	2.76139e-54	2	Cnn3
5.45485e-58	0.294149	1	1	9.40362e-54	2	Rpl22
5.971e-58	0.423451	0.581	0.249	1.02934e-53	2	Igfbp3
6.44267e-58	0.517222	0.372	0.126	1.11065e-53	2	Cd82
2.48847e-57	0.275614	1	1	4.28987e-53	2	Naca
6.97134e-57	0.41527	0.412	0.147	1.20179e-52	2	Ptgis
1.28799e-56	0.530749	0.612	0.304	2.22037e-52	2	Zeb1
7.77071e-56	0.475666	0.996	0.988	1.33959e-51	2	Ran
1.33469e-55	0.422571	0.998	0.98	2.30088e-51	2	Uqcr11
3.56812e-55	0.485806	0.989	0.936	6.15108e-51	2	Tomm20
1.52769e-54	0.562747	0.867	0.607	2.63359e-50	2	Eif4ebp1
2.08623e-54	0.301075	1	1	3.59646e-50	2	Rpl22l1
4.0511e-54	0.355561	0.392	0.136	6.98369e-50	2	Six1
6.72724e-54	0.328107	0.273	0.073	1.15971e-49	2	Tspan12
2.6719e-53	0.320217	1	1	4.60609e-49	2	Eef1b2
3.46177e-53	0.378834	0.297	0.085	5.96775e-49	2	Gm266
8.92777e-53	0.490607	0.596	0.307	1.53906e-48	2	Med30
1.53958e-52	0.326419	0.304	0.091	2.65408e-48	2	Zfp568
6.71505e-51	0.583346	0.894	0.701	1.15761e-46	2	Cfl2
1.91302e-50	0.407695	0.381	0.14	3.29785e-46	2	Klhl13
3.68106e-50	0.425367	0.479	0.21	6.34577e-46	2	Zdbf2
3.6994e-50	0.558222	0.885	0.69	6.3774e-46	2	Smc6
3.88663e-50	0.36196	1	0.995	6.70017e-46	2	Gm10073
8.43419e-50	0.409776	0.392	0.146	1.45397e-45	2	Tnik
2.03396e-49	0.740795	0.893	0.715	3.50634e-45	2	Nnat
6.88581e-49	0.75692	0.577	0.293	1.18705e-44	2	Tubb6
1.11412e-47	0.394304	0.998	0.983	1.92063e-43	2	Uqcrq
2.4477e-47	0.268224	0.259	0.072	4.21959e-43	2	Lfng
2.74954e-47	0.250938	1	1	4.73992e-43	2	Rps21
3.43033e-47	0.386659	0.528	0.249	5.91355e-43	2	Cdk2ap1
4.59268e-47	0.341189	0.368	0.135	7.91733e-43	2	Lmnb2
7.68327e-47	0.467751	0.505	0.239	1.32452e-42	2	Lta4h
1.13566e-46	0.483841	0.607	0.325	1.95776e-42	2	Ucp2
1.55306e-46	0.575034	0.597	0.335	2.67731e-42	2	Bin1
5.15292e-46	0.297931	1	1	8.88312e-42	2	Gm10076
1.5555e-45	0.442849	0.973	0.839	2.68153e-41	2	Tcp1
2.18889e-45	0.473062	0.953	0.829	3.77342e-41	2	Ccnd3
8.94865e-45	0.410267	0.985	0.963	1.54266e-40	2	Snrpf
1.19742e-44	0.370926	0.479	0.213	2.06423e-40	2	Arhgap29
3.06595e-44	0.424967	0.603	0.32	5.28539e-40	2	Clcn5
3.78645e-44	0.387755	0.501	0.235	6.52747e-40	2	Tmem123
1.56312e-43	0.438889	0.601	0.331	2.69467e-39	2	Tln2
4.16327e-43	0.394716	1	0.99	7.17706e-39	2	Hmgn2
2.10432e-42	0.328127	0.368	0.143	3.62764e-38	2	St3gal5
3.22294e-42	0.265384	1	1	5.55603e-38	2	Gnb2l1
1.40102e-41	0.298899	1	0.999	2.41521e-37	2	Rpl5
4.08512e-41	0.458282	0.958	0.86	7.04234e-37	2	U2af1
6.64696e-41	0.453851	0.94	0.793	1.14587e-36	2	Cct4
6.85041e-41	0.393246	1	0.999	1.18094e-36	2	Mif
1.92289e-40	0.416104	0.962	0.828	3.31487e-36	2	Ndufab1
2.63482e-40	0.460206	0.814	0.581	4.54216e-36	2	Sms
2.866e-40	0.46973	0.61	0.354	4.9407e-36	2	Capn6
5.24681e-40	0.431207	0.978	0.871	9.04497e-36	2	Slc25a5
5.79679e-40	0.319398	0.392	0.16	9.99308e-36	2	Pdgfc
6.47109e-40	0.299502	1	0.999	1.11555e-35	2	Cox7a2
8.47555e-40	0.390222	0.987	0.959	1.4611e-35	2	Atp5c1
2.647e-39	0.444696	0.985	0.951	4.56316e-35	2	Atp5b
6.55544e-39	0.362914	0.987	0.957	1.13009e-34	2	Slc25a3
6.58488e-39	0.327272	0.344	0.133	1.13517e-34	2	Sdpr
1.0399e-38	1.42897	0.284	0.104	1.79268e-34	2	Myl1
4.24746e-38	0.319012	0.295	0.107	7.3222e-34	2	Peg12
5.15124e-38	0.428036	0.592	0.334	8.88022e-34	2	Glipr2
5.57454e-38	0.295263	1	0.999	9.60995e-34	2	Btf3
5.60844e-38	0.438184	0.896	0.724	9.66839e-34	2	Uqcrfs1
9.92737e-38	0.347743	0.454	0.216	1.71138e-33	2	Acadl
3.31422e-37	0.508759	0.913	0.801	5.71339e-33	2	Polr2i
3.65297e-37	0.489431	0.694	0.459	6.29735e-33	2	Akr1b3
4.15078e-37	0.317958	0.408	0.181	7.15553e-33	2	Ncoa1
4.31868e-37	0.316885	0.372	0.156	7.44498e-33	2	2610318N02Rik
1.32277e-36	0.264979	0.301	0.11	2.28032e-32	2	Rbm38
1.36039e-36	0.62905	0.716	0.516	2.34517e-32	2	Pfn2
1.71001e-36	0.459722	0.43	0.203	2.94788e-32	2	Ckb
3.76426e-36	0.367504	0.434	0.209	6.48921e-32	2	Smarcd3
3.89677e-36	0.418408	0.423	0.201	6.71765e-32	2	Gamt
5.42084e-36	0.400925	0.652	0.407	9.34498e-32	2	Fxr1
5.78166e-36	0.39162	0.918	0.753	9.967e-32	2	Nudt21
7.19379e-36	0.377941	0.982	0.923	1.24014e-31	2	Pkm
1.03937e-35	0.398774	0.607	0.364	1.79178e-31	2	Mycbp
1.45109e-35	0.30937	0.415	0.191	2.50154e-31	2	Ltv1
3.69866e-35	0.323581	0.998	0.992	6.37612e-31	2	Slc25a4
4.04223e-35	0.422372	0.991	0.979	6.9684e-31	2	Ncl
7.09198e-35	0.383773	0.607	0.35	1.22259e-30	2	Psat1
2.07408e-34	0.429048	0.792	0.589	3.5755e-30	2	Paics
2.4936e-34	1.23044	0.295	0.122	4.29872e-30	2	Tnni1
3.89446e-34	0.25111	0.255	0.088	6.71366e-30	2	Foxo4
4.08658e-34	0.319429	0.998	0.995	7.04485e-30	2	Rps27l
5.02669e-34	0.412667	0.557	0.311	8.66552e-30	2	Tgfb2
1.53513e-33	0.367454	1	1	2.6464e-29	2	H2afz
1.61775e-33	0.37289	0.638	0.4	2.78885e-29	2	Mrto4
1.90532e-33	0.324973	0.989	0.975	3.28458e-29	2	Atp5o
1.93525e-33	0.350674	0.973	0.91	3.33618e-29	2	Pdcd5
3.007e-33	0.501093	0.601	0.394	5.18377e-29	2	Arl6ip5
4.5884e-33	0.459031	0.709	0.496	7.90995e-29	2	Zfp106
7.7067e-33	0.310586	1	0.998	1.32856e-28	2	Pfn1
8.21286e-33	0.318338	0.454	0.227	1.41581e-28	2	Flnc
1.87156e-32	0.337044	0.505	0.268	3.22638e-28	2	Tubb2a
2.04998e-32	0.433182	0.891	0.756	3.53396e-28	2	Dctpp1
3.88792e-32	0.375138	0.918	0.768	6.70239e-28	2	Glrx3
1.40535e-31	0.403337	0.736	0.514	2.42269e-27	2	Ola1
1.9623e-31	0.281748	0.306	0.125	3.38282e-27	2	Notch3
2.35668e-31	0.386929	0.989	0.983	4.06268e-27	2	Anp32b
2.67436e-31	0.392098	0.831	0.647	4.61034e-27	2	Tead2
6.61189e-31	0.277696	0.27	0.103	1.13982e-26	2	Pkia
6.88428e-31	0.371461	0.98	0.904	1.18678e-26	2	Cox5a
7.09665e-31	0.38967	0.933	0.851	1.22339e-26	2	Atp5g3
1.40096e-30	0.390483	0.931	0.789	2.41511e-26	2	Vdac1
1.42104e-30	0.399715	0.843	0.653	2.44973e-26	2	Cacybp
3.20516e-30	0.407101	0.727	0.515	5.52537e-26	2	Odc1
3.27861e-30	0.376418	0.689	0.471	5.65199e-26	2	Zyx
3.62487e-30	0.305616	0.989	0.954	6.24892e-26	2	Pcbp2
4.62699e-30	0.358462	0.65	0.425	7.97647e-26	2	Gtpbp4
1.46436e-29	0.305847	0.985	0.947	2.52441e-25	2	Tbca
1.56676e-29	0.346618	0.974	0.924	2.70093e-25	2	Ldha
1.57942e-29	0.369691	0.858	0.677	2.72276e-25	2	Vdac2
4.63183e-29	0.329587	0.543	0.312	7.98481e-25	2	Lpar4
7.15286e-29	0.359661	0.818	0.615	1.23308e-24	2	Psmg4
2.5294e-28	0.333951	0.681	0.458	4.36044e-24	2	Carhsp1
5.51736e-28	0.33107	0.987	0.935	9.51139e-24	2	Txn1
6.19355e-28	0.327755	0.29	0.123	1.06771e-23	2	Pcdh17
1.0225e-27	0.353389	0.945	0.835	1.76268e-23	2	Metap2
1.38495e-27	0.306421	0.554	0.329	2.38752e-23	2	2010111I01Rik
2.07553e-27	0.286311	0.459	0.249	3.578e-23	2	Pgk1
3.42281e-27	0.280435	0.996	0.991	5.90058e-23	2	Snrpe
5.17134e-27	0.310043	0.98	0.957	8.91487e-23	2	2010107E04Rik
5.47419e-27	0.259269	0.304	0.133	9.43696e-23	2	Sapcd1
5.8375e-27	0.51798	0.687	0.486	1.00633e-22	2	Bex1
6.61655e-27	0.320924	0.991	0.971	1.14063e-22	2	Hsp90aa1
8.72168e-27	0.251456	0.337	0.156	1.50353e-22	2	Arhgef2
9.04235e-27	0.301013	0.386	0.195	1.55881e-22	2	Map2k1
9.12964e-27	0.300033	0.617	0.393	1.57386e-22	2	Ube2d1
2.14305e-26	0.483868	0.541	0.356	3.69441e-22	2	Vasp
2.70899e-26	0.366297	0.891	0.725	4.67002e-22	2	Mrpl12
3.78411e-26	0.294653	0.962	0.903	6.52342e-22	2	Lsm4
5.38721e-26	0.364673	0.523	0.323	9.28701e-22	2	Ybx3
8.00337e-26	0.29215	0.998	0.974	1.3797e-21	2	Pdap1
1.30789e-25	0.345762	0.913	0.771	2.25467e-21	2	Eif3m
1.50551e-25	0.351226	0.934	0.813	2.59534e-21	2	Fkbp3
1.86353e-25	0.347744	0.648	0.445	3.21253e-21	2	Ddx21
1.95079e-25	0.318592	0.55	0.342	3.36297e-21	2	Chchd4
2.08213e-25	0.35363	0.951	0.846	3.58939e-21	2	Cct5
2.16001e-25	0.334199	0.996	0.984	3.72363e-21	2	Ranbp1
2.23801e-25	0.34941	0.872	0.731	3.8581e-21	2	Snrpb2
3.25405e-25	0.376175	0.577	0.387	5.60965e-21	2	Traf4
6.05114e-25	0.389854	0.566	0.374	1.04316e-20	2	Dbn1
8.62338e-25	0.293906	0.98	0.965	1.48658e-20	2	2700060E02Rik
8.88763e-25	0.349066	0.672	0.483	1.53214e-20	2	Cox17
9.54954e-25	0.272581	0.998	0.989	1.64625e-20	2	Cox5b
1.57517e-24	0.349008	0.831	0.664	2.71544e-20	2	Cct7
3.07923e-24	0.307822	0.834	0.645	5.30829e-20	2	Gm10036
3.0993e-24	0.289646	0.41	0.22	5.34288e-20	2	Hs6st2
4.21644e-24	0.316442	0.59	0.389	7.26873e-20	2	Ccdc58
4.24581e-24	0.348009	0.929	0.826	7.31935e-20	2	Lsm5
6.21243e-24	0.272248	0.995	0.967	1.07096e-19	2	Rps12-ps3
9.9419e-24	0.329007	0.548	0.356	1.71388e-19	2	Skp2
1.31139e-23	0.274545	0.98	0.953	2.2607e-19	2	Atp5a1
1.4936e-23	0.282067	0.45	0.257	2.57482e-19	2	Bcl7a
1.5389e-23	1.88714	0.525	0.354	2.65291e-19	2	Mylpf
1.63166e-23	0.343683	0.894	0.726	2.81281e-19	2	Ddah2
2.12855e-23	0.351255	0.934	0.79	3.6694e-19	2	Nhp2
2.38499e-23	0.305908	0.971	0.891	4.11148e-19	2	Atp5f1
3.16366e-23	0.308668	0.723	0.523	5.45384e-19	2	Dnaja2
4.55255e-23	0.317272	0.455	0.276	7.84815e-19	2	Mad2l2
6.06805e-23	0.303487	0.648	0.443	1.04607e-18	2	Dnajc2
9.05061e-23	0.261156	0.993	0.962	1.56023e-18	2	Rpl29
1.01325e-22	0.380581	0.587	0.394	1.74675e-18	2	Rrm2
1.14164e-22	0.305357	0.685	0.473	1.96807e-18	2	Fxyd6
1.94207e-22	0.330137	0.945	0.854	3.34793e-18	2	Phb2
1.94404e-22	0.294351	0.388	0.205	3.35132e-18	2	Vgll3
2.49351e-22	0.304547	0.548	0.348	4.29856e-18	2	Ralgps2
2.6415e-22	0.270394	0.439	0.25	4.55369e-18	2	Hsph1
4.22673e-22	0.302744	0.523	0.336	7.28646e-18	2	Rrp15
6.99277e-22	0.311521	0.871	0.718	1.20548e-17	2	Cct8
1.0161e-21	0.276858	0.313	0.153	1.75165e-17	2	Shisa2
9.60153e-21	0.293819	0.893	0.777	1.65521e-16	2	Mdh2
1.24068e-20	0.2945	0.809	0.631	2.1388e-16	2	Cyc1
1.57984e-20	0.304892	0.789	0.645	2.72349e-16	2	Dcakd
2.13471e-20	0.267849	0.515	0.325	3.68002e-16	2	Rangrf
2.40376e-20	0.287387	0.862	0.694	4.14384e-16	2	Llph
3.32701e-20	0.301258	0.809	0.651	5.73544e-16	2	Pa2g4
6.38351e-20	0.272483	0.703	0.509	1.10045e-15	2	Snhg6
7.75822e-20	0.290807	0.619	0.439	1.33744e-15	2	Got2
1.0084e-19	0.261519	0.406	0.236	1.73839e-15	2	Prr5
1.05774e-19	0.282196	0.397	0.232	1.82344e-15	2	Serinc2
1.06029e-19	0.264474	0.993	0.961	1.82784e-15	2	Nap1l1
1.14663e-19	0.250337	0.31	0.16	1.97668e-15	2	Fhl1
1.5399e-19	0.303243	0.933	0.849	2.65464e-15	2	Ndufc2
2.32195e-19	0.283901	0.831	0.678	4.00281e-15	2	Rps18-ps3
2.62289e-19	0.284706	0.681	0.501	4.52161e-15	2	Tomm40
2.9587e-19	0.262829	0.729	0.541	5.1005e-15	2	Uqcrc2
3.46776e-19	0.291535	0.869	0.727	5.97807e-15	2	Hmgb3
4.77947e-19	0.277415	0.643	0.459	8.23933e-15	2	Psmc6
5.60896e-19	0.346151	0.253	0.123	9.66929e-15	2	Myl6b
1.36156e-18	0.330901	0.9	0.805	2.34719e-14	2	Prmt1
1.55607e-18	0.857306	0.333	0.193	2.68251e-14	2	Cdkn1a
2.04415e-18	0.298207	0.625	0.462	3.52392e-14	2	Dnajc7
2.76045e-18	0.258203	0.523	0.348	4.75874e-14	2	Pex19
3.03878e-18	0.32565	0.827	0.684	5.23855e-14	2	Dut
3.33307e-18	0.289867	0.776	0.638	5.74588e-14	2	Gpi1
3.539e-18	0.294147	0.816	0.675	6.10088e-14	2	Ndufs2
3.74636e-18	0.969614	0.297	0.159	6.45836e-14	2	Tnnc1
4.0121e-18	0.291455	0.441	0.286	6.91646e-14	2	Rrp7a
4.26117e-18	0.275896	0.933	0.858	7.34583e-14	2	Mrpl30
1.00673e-17	0.275178	0.413	0.254	1.7355e-13	2	Katnbl1
1.05848e-17	0.278317	0.39	0.234	1.82471e-13	2	Hip1
1.20195e-17	0.283957	0.876	0.725	2.07205e-13	2	Eif3j1
1.76635e-17	0.317074	0.667	0.517	3.045e-13	2	Purb
2.06339e-17	0.288182	0.871	0.734	3.55708e-13	2	Fbl
2.21597e-17	0.260004	0.829	0.669	3.82012e-13	2	Ndufv2
2.68436e-17	0.273565	0.925	0.826	4.62756e-13	2	Slirp
4.06527e-17	0.284099	0.384	0.235	7.00811e-13	2	Ccng2
4.78192e-17	0.260213	0.625	0.448	8.24354e-13	2	Mrpl15
4.81589e-17	0.250079	0.614	0.434	8.30211e-13	2	Naa15
5.64724e-17	0.306341	0.685	0.527	9.73527e-13	2	Gnl3
8.28185e-17	0.284614	0.856	0.71	1.42771e-12	2	Cbx5
9.58827e-17	0.308411	0.641	0.485	1.65292e-12	2	Josd2
1.4228e-16	0.289878	0.985	0.975	2.45276e-12	2	Ube2s
2.69969e-16	0.262199	0.696	0.532	4.65399e-12	2	Rsl1d1
2.75711e-16	0.26317	0.554	0.382	4.75298e-12	2	Phldb2
5.22207e-16	0.274857	0.57	0.419	9.00232e-12	2	Slmo2
5.85815e-16	0.615209	0.894	0.805	1.00989e-11	2	Svbp
6.87431e-16	0.256406	0.876	0.755	1.18506e-11	2	Ndufa10
1.88057e-15	0.279005	0.78	0.655	3.24192e-11	2	Eif3l
2.44688e-15	0.261344	0.834	0.698	4.21818e-11	2	Eif1ax
2.73845e-15	0.262718	0.847	0.731	4.72081e-11	2	Rnps1
8.5484e-15	0.273696	0.679	0.542	1.47366e-10	2	Hspa9
2.08834e-14	0.280287	0.545	0.405	3.60009e-10	2	Rtn4
1.07168e-13	0.291902	0.475	0.346	1.84746e-09	2	Sirt2
5.11428e-13	0.251673	0.922	0.817	8.8165e-09	2	Tomm5
2.60797e-12	0.25449	0.776	0.671	4.49588e-08	2	Psmd4
4.08711e-12	0.267847	0.689	0.562	7.04577e-08	2	Cd164
5.32494e-11	0.259907	0.35	0.236	9.17966e-07	2	Mospd1
9.03072e-11	1.06726	0.25	0.151	1.55681e-06	2	Acta1
9.54425e-10	0.260104	0.63	0.527	1.64533e-05	2	Dnajb1
0	1.78395	0.912	0.133	0	3	Wnt6
0	1.77364	0.902	0.131	0	3	Tfap2b
0	1.0714	0.518	0.036	0	3	Gjb2
0	1.06608	0.586	0.034	0	3	Gjb6
3.80789e-307	1.68891	0.851	0.164	6.56443e-303	3	Krt5
2.07547e-294	2.04552	0.805	0.175	3.57791e-290	3	Lmo1
5.57158e-292	2.90225	1	0.606	9.60484e-288	3	Cxcl14
1.05423e-282	2.24983	0.974	0.357	1.81739e-278	3	Krt14
3.72482e-278	0.827731	0.586	0.062	6.42122e-274	3	Trp63
3.9461e-266	1.21388	0.795	0.163	6.80268e-262	3	Bcam
8.26043e-264	0.835373	0.556	0.06	1.42401e-259	3	Wnt7b
6.70757e-263	1.05666	0.673	0.103	1.15632e-258	3	Kremen2
1.6023e-261	1.869	0.809	0.186	2.76221e-257	3	Mt2
6.06947e-258	1.14131	0.924	0.24	1.04632e-253	3	Perp
1.03312e-227	1.76994	0.96	0.387	1.78099e-223	3	Mt1
2.93403e-226	0.614173	0.408	0.031	5.05797e-222	3	Col17a1
2.0355e-208	0.487884	0.323	0.018	3.509e-204	3	Wnt3
2.16829e-206	1.47136	0.94	0.373	3.73792e-202	3	Pdgfa
6.86987e-205	1.32148	0.825	0.252	1.1843e-200	3	Krt15
1.22464e-197	0.857416	0.542	0.082	2.11116e-193	3	4631405K08Rik
2.97194e-178	0.688795	0.512	0.081	5.12332e-174	3	Rab38
7.23026e-175	0.408229	0.265	0.013	1.24642e-170	3	Irx4
1.64523e-174	0.670291	0.55	0.095	2.83621e-170	3	Fermt1
1.10548e-135	0.465092	0.303	0.032	1.90574e-131	3	Anxa8
5.29392e-133	0.583613	0.562	0.128	9.12619e-129	3	Dsp
6.06443e-132	0.758734	0.685	0.207	1.04545e-127	3	Sfn
9.80529e-128	0.886568	1	0.974	1.69033e-123	3	S100a11
4.26146e-121	0.502561	0.357	0.056	7.34634e-117	3	Fzd10
1.13311e-119	1.25054	0.747	0.308	1.95336e-115	3	Lgals7
9.39895e-119	0.880235	0.815	0.389	1.62028e-114	3	Ptprf
4.02992e-118	0.818145	0.637	0.207	6.94718e-114	3	Pdlim1
6.23225e-118	0.745206	0.647	0.211	1.07438e-113	3	Fgfr2
3.24504e-117	0.732218	0.667	0.208	5.59412e-113	3	Spint2
1.06267e-113	1.31871	0.823	0.406	1.83194e-109	3	Sostdc1
5.68836e-113	0.943211	0.805	0.369	9.80616e-109	3	Bcl11b
1.08157e-111	0.630277	0.614	0.169	1.86451e-107	3	Epcam
7.64802e-111	0.508725	0.384	0.071	1.31844e-106	3	Pltp
6.50436e-109	0.924675	0.958	0.805	1.12129e-104	3	Txndc17
2.39237e-108	0.432099	0.371	0.066	4.1242e-104	3	Tfap2a
1.99948e-105	0.827172	0.982	0.763	3.44691e-101	3	Cd24a
5.5577e-102	0.551571	0.392	0.08	9.58092e-98	3	Car12
2.97432e-100	0.365243	0.289	0.042	5.12743e-96	3	Wnt10a
7.20536e-98	0.394091	0.323	0.055	1.24213e-93	3	Pkp3
3.25165e-96	0.623148	0.524	0.154	5.60552e-92	3	Wnt4
5.33912e-95	0.553423	0.532	0.15	9.2041e-91	3	Fxyd3
9.52502e-93	0.551449	0.49	0.139	1.64202e-88	3	Fras1
4.23223e-91	0.326909	0.261	0.037	7.29595e-87	3	Susd4
4.72567e-91	0.405374	1	1	8.14658e-87	3	Fth1
1.39805e-90	0.507922	0.466	0.128	2.4101e-86	3	Ajuba
1.12519e-89	0.347673	0.281	0.045	1.93972e-85	3	Plppr1
5.44169e-88	0.797564	0.797	0.433	9.38092e-84	3	Wls
6.92747e-84	0.593569	0.56	0.196	1.19423e-79	3	Tnfrsf19
6.15872e-82	0.547159	1	1	1.0617e-77	3	Ptma
6.16231e-82	0.538858	0.49	0.152	1.06232e-77	3	Pdgfc
1.81971e-80	0.44826	0.263	0.044	3.137e-76	3	Hotairm1
6.37873e-78	1.02158	0.857	0.523	1.09963e-73	3	Igfbp2
5.27812e-77	0.396164	0.311	0.065	9.09895e-73	3	Ppp1r14c
1.8572e-76	0.511843	0.5	0.161	3.20162e-72	3	Chchd10
2.03479e-76	0.750756	0.61	0.259	3.50777e-72	3	Lef1
6.51057e-76	0.328877	0.265	0.047	1.12236e-71	3	Celsr1
1.05047e-75	0.471924	1	0.999	1.81091e-71	3	Hmgn1
1.94669e-75	0.340298	0.287	0.055	3.3559e-71	3	Mpzl2
1.22368e-71	0.409205	0.464	0.143	2.1095e-67	3	Col18a1
1.58832e-71	0.532169	0.371	0.099	2.7381e-67	3	Apoc1
1.06035e-70	0.484458	0.434	0.132	1.82794e-66	3	Kif21a
1.5838e-68	0.459263	0.47	0.157	2.73032e-64	3	Mapk13
6.38961e-68	0.292575	1	1	1.1015e-63	3	Rps26
6.00202e-67	0.351463	0.285	0.062	1.03469e-62	3	Skap2
1.30964e-66	0.611262	0.988	0.901	2.25768e-62	3	Siva1
1.85325e-65	0.311566	0.305	0.07	3.19481e-61	3	Trim29
2.71625e-65	0.31338	0.275	0.059	4.68254e-61	3	Kdf1
3.22525e-65	0.44889	0.412	0.129	5.56001e-61	3	Satb1
9.21151e-62	0.649746	0.787	0.46	1.58797e-57	3	Bcl11a
4.53058e-60	0.300769	0.257	0.055	7.81027e-56	3	Gata3
7.89055e-60	0.466753	0.462	0.164	1.36025e-55	3	Emb
3.60051e-59	0.796867	0.888	0.629	6.20693e-55	3	Hmga2
5.45546e-59	0.330131	0.283	0.068	9.40467e-55	3	Edaradd
6.78046e-58	0.270964	0.261	0.058	1.16888e-53	3	Hpgds
1.61498e-57	0.481459	0.998	0.972	2.78406e-53	3	Atox1
2.00752e-57	0.304089	0.337	0.093	3.46077e-53	3	Lsr
4.01698e-56	0.686897	0.986	0.931	6.92488e-52	3	Ccnd2
3.25662e-55	0.463678	0.44	0.163	5.61408e-51	3	Bmp7
1.6152e-54	1.07865	0.777	0.508	2.78445e-50	3	Ifitm3
2.14618e-54	0.367515	1	0.999	3.6998e-50	3	Sepw1
4.29944e-54	0.305432	0.263	0.064	7.41181e-50	3	Fry
1.4409e-53	0.31063	0.291	0.077	2.48397e-49	3	Ntf5
1.07274e-52	0.536854	0.582	0.272	1.84929e-48	3	Cd9
1.09692e-52	0.54366	0.898	0.582	1.89099e-48	3	Meis2
4.54785e-52	0.421417	0.528	0.225	7.84004e-48	3	Hmga1
6.28333e-52	0.644635	0.771	0.479	1.08318e-47	3	Bex1
5.20045e-48	0.28284	0.265	0.071	8.96506e-44	3	Acer2
2.6108e-47	0.438664	0.673	0.357	4.50076e-43	3	Gja1
6.0306e-47	0.336936	0.353	0.12	1.03962e-42	3	Igsf9
3.78565e-46	0.489061	0.482	0.215	6.52608e-42	3	Nav2
5.45271e-46	0.395595	0.323	0.107	9.39993e-42	3	Irx2
9.4925e-46	0.429272	0.99	0.942	1.63641e-41	3	Tomm7
7.43565e-44	0.293732	0.295	0.091	1.28183e-39	3	Cxadr
1.20603e-42	0.346735	0.382	0.143	2.07908e-38	3	Npnt
1.4131e-42	0.311885	0.311	0.103	2.43604e-38	3	Crim1
3.51907e-42	0.49645	0.612	0.337	6.06653e-38	3	Cdk6
1.65474e-41	0.495422	0.624	0.364	2.85261e-37	3	Ryk
1.1906e-40	0.399156	0.996	0.98	2.05248e-36	3	Uqcr11
4.59324e-40	0.280064	0.353	0.128	7.91828e-36	3	Klf5
1.82026e-39	0.5435	0.657	0.404	3.13794e-35	3	Svil
2.52546e-39	0.421264	0.596	0.323	4.35365e-35	3	Hras
7.1544e-39	0.359248	0.388	0.158	1.23335e-34	3	Ptpn14
9.53634e-39	0.386441	0.558	0.288	1.64397e-34	3	Fam213a
3.4672e-38	0.603988	0.869	0.73	5.97711e-34	3	Fam162a
8.69556e-37	0.301355	0.311	0.113	1.49903e-32	3	Gstm2
1.42361e-36	0.457029	0.924	0.803	2.45416e-32	3	Mrpl23
2.31645e-36	0.296602	1	0.998	3.99334e-32	3	Hspe1
2.64959e-36	0.320297	0.313	0.116	4.56763e-32	3	Znrf3
5.32506e-36	0.332253	1	0.999	9.17987e-32	3	Mif
6.53045e-36	0.256526	0.285	0.097	1.12578e-31	3	Stard10
8.88763e-36	0.349965	0.402	0.174	1.53214e-31	3	Klk8
2.50081e-35	0.429668	0.775	0.504	4.31115e-31	3	Foxp1
2.77571e-35	0.327871	0.373	0.156	4.78505e-31	3	5930412G12Rik
5.39622e-35	0.440206	0.938	0.835	9.30255e-31	3	Aprt
1.18604e-34	0.404916	0.737	0.514	2.04461e-30	3	Ldhb
2.39081e-34	0.411359	0.536	0.283	4.12152e-30	3	Sdc4
2.43257e-34	0.381208	1	0.999	4.19351e-30	3	Hmgb1
2.64239e-34	0.269507	0.301	0.11	4.55521e-30	3	Gstk1
2.66165e-34	0.365449	0.97	0.924	4.58842e-30	3	Dbi
9.69607e-34	0.330052	0.313	0.122	1.67151e-29	3	Slc2a1
5.67476e-33	0.276951	0.285	0.104	9.78273e-29	3	Ngf
5.80157e-33	0.300383	0.329	0.132	1.00013e-28	3	Cdca7l
1.12512e-32	0.436012	0.616	0.376	1.9396e-28	3	Fam101b
4.2927e-32	0.395373	0.598	0.353	7.40019e-28	3	Cdk2ap2
1.03039e-31	0.277414	0.38	0.163	1.77628e-27	3	Itga6
1.80435e-31	0.345572	0.522	0.28	3.11053e-27	3	Nxn
6.91541e-31	0.2589	0.287	0.107	1.19215e-26	3	Sox6
1.31207e-30	0.359062	0.462	0.237	2.26187e-26	3	Dst
1.97557e-30	0.34306	0.998	0.986	3.40568e-26	3	Set
2.11022e-30	0.297834	0.978	0.906	3.63781e-26	3	Fabp5
2.43265e-30	0.356067	0.994	0.978	4.19364e-26	3	Cox7a2l
6.08837e-30	0.28014	0.56	0.302	1.04957e-25	3	Arhgdib
1.28617e-29	0.371474	0.414	0.203	2.21723e-25	3	Lgr4
1.56953e-29	0.375258	0.5	0.28	2.70572e-25	3	Slc39a10
2.07862e-29	0.356943	0.968	0.903	3.58333e-25	3	Ndufs6
2.83957e-29	0.446106	0.89	0.757	4.89513e-25	3	Pgam1
2.93507e-29	0.259934	0.351	0.15	5.05977e-25	3	Barx2
4.75362e-29	0.259667	1	0.999	8.19477e-25	3	Atp5l
5.39982e-29	0.272785	0.38	0.169	9.30875e-25	3	Parm1
5.76307e-29	0.334502	0.506	0.279	9.93496e-25	3	Nudt14
9.05565e-29	0.392403	0.918	0.778	1.5611e-24	3	Hmgn3
1.03451e-28	0.439103	0.821	0.624	1.78338e-24	3	Hdgf
1.70406e-28	0.509614	0.853	0.712	2.93763e-24	3	Ctnnb1
1.49691e-27	0.468485	0.598	0.394	2.58052e-23	3	Ctsl
1.74442e-27	0.406211	0.97	0.897	3.00721e-23	3	Dek
2.75092e-26	0.400036	0.992	0.984	4.74231e-22	3	Prdx1
3.15921e-26	0.258193	0.277	0.113	5.44616e-22	3	Sult5a1
3.79028e-26	0.321639	0.46	0.251	6.53407e-22	3	Avpi1
5.36309e-26	0.266668	1	0.999	9.24543e-22	3	Erh
5.76586e-26	0.379901	0.711	0.506	9.93976e-22	3	Cyb5r3
1.951e-25	0.36708	0.52	0.315	3.36332e-21	3	Spr
6.76656e-25	0.351341	0.554	0.343	1.16649e-20	3	Cnih2
7.33021e-25	0.415864	0.849	0.71	1.26366e-20	3	Ralbp1
1.26529e-24	0.50323	0.797	0.672	2.18123e-20	3	Mdh1
4.49024e-24	0.313269	0.92	0.835	7.74073e-20	3	Itm2b
5.57676e-24	0.322442	0.486	0.279	9.61378e-20	3	Pts
6.05993e-24	0.364225	0.789	0.558	1.04467e-19	3	Igfbp5
1.32636e-23	0.267746	1	0.998	2.28651e-19	3	Atp5g1
1.6064e-23	0.264617	0.351	0.172	2.76928e-19	3	Etl4
1.61352e-23	0.255815	0.39	0.197	2.78154e-19	3	Capg
1.83943e-23	0.27387	0.39	0.201	3.17099e-19	3	Agrn
2.89578e-23	0.392593	0.709	0.511	4.99203e-19	3	Phgdh
9.79859e-23	0.336071	0.649	0.445	1.68918e-18	3	Ppil1
1.27786e-22	0.258132	0.371	0.189	2.20291e-18	3	Rbbp8
1.86981e-21	0.309716	0.5	0.305	3.22337e-17	3	Fam60a
2.51386e-21	0.262066	0.998	0.99	4.33364e-17	3	Stmn1
2.97169e-21	0.312996	0.679	0.479	5.12289e-17	3	Scp2
1.08669e-20	0.299768	0.502	0.314	1.87335e-16	3	Suclg2
1.1995e-20	0.308707	0.56	0.362	2.06782e-16	3	Eef1e1
1.25417e-20	0.357939	0.96	0.926	2.16206e-16	3	Pkm
1.48669e-19	0.319801	0.857	0.719	2.56291e-15	3	H2afj
2.02243e-19	0.322188	0.566	0.375	3.48646e-15	3	Uhrf1
2.76022e-19	0.298749	0.536	0.351	4.75835e-15	3	Rac3
3.26008e-19	0.311259	0.731	0.561	5.62005e-15	3	Ube2e1
3.59449e-19	0.293881	1	1	6.19654e-15	3	H2afz
4.05659e-19	0.269197	0.958	0.838	6.99315e-15	3	Chd3
8.88181e-19	0.320456	0.827	0.7	1.53113e-14	3	Knop1
1.36185e-18	0.256118	0.446	0.265	2.3477e-14	3	Ank3
1.49183e-18	0.280487	0.52	0.335	2.57177e-14	3	Nabp2
1.64684e-18	0.251768	0.98	0.963	2.83899e-14	3	Snrpf
2.02947e-18	0.29133	0.496	0.318	3.49861e-14	3	Cd2ap
4.0232e-18	0.253846	0.369	0.207	6.93559e-14	3	Ppfibp1
4.0683e-18	0.285337	0.522	0.347	7.01334e-14	3	Pard6g
4.32536e-18	0.257268	0.996	0.985	7.45648e-14	3	Cox7b
5.64479e-18	0.278121	0.95	0.881	9.73105e-14	3	Sumo3
7.75998e-18	0.287394	0.966	0.903	1.33774e-13	3	Lsm4
9.67e-18	0.29968	0.675	0.519	1.66701e-13	3	Vps36
1.31964e-17	0.28964	0.52	0.346	2.27492e-13	3	Flywch2
2.12523e-17	0.257433	0.994	0.982	3.66369e-13	3	H2afv
2.68337e-17	0.257333	0.426	0.253	4.62586e-13	3	Gcat
2.87299e-17	0.330612	0.653	0.486	4.95274e-13	3	Trp53
3.75911e-17	0.30344	0.888	0.773	6.48034e-13	3	G3bp1
6.70596e-17	0.256759	0.484	0.307	1.15604e-12	3	Fat1
1.55031e-16	0.253042	0.448	0.279	2.67257e-12	3	Msi2
2.40914e-16	0.323379	0.669	0.525	4.15312e-12	3	Luzp1
5.99664e-16	0.255548	0.972	0.931	1.03376e-11	3	Park7
2.03938e-15	0.280144	0.922	0.85	3.51569e-11	3	1110004F10Rik
2.31669e-15	0.297165	0.825	0.686	3.99374e-11	3	Dut
2.47231e-15	0.304622	0.916	0.824	4.26201e-11	3	Gltscr2
2.69773e-15	0.303704	0.898	0.823	4.65061e-11	3	Ndufa12
3e-15	0.27126	0.831	0.699	5.1717e-11	3	Llph
3.98289e-15	0.469334	0.608	0.489	6.8661e-11	3	Nfkbia
5.7077e-15	0.284202	0.727	0.587	9.8395e-11	3	Nras
6.59233e-15	0.281565	0.956	0.882	1.13645e-10	3	Anxa2
8.4789e-15	0.272714	0.811	0.66	1.46168e-10	3	Dynll2
1.14832e-14	0.280739	0.588	0.447	1.97959e-10	3	Churc1
1.22681e-14	0.274864	0.747	0.609	2.11489e-10	3	Znhit1
1.25106e-14	0.286532	0.857	0.786	2.15671e-10	3	Skp1a
1.58348e-14	0.263068	0.886	0.758	2.72976e-10	3	Dctpp1
2.08669e-13	0.276865	0.896	0.832	3.59725e-09	3	Srsf7
5.5166e-13	0.262528	0.928	0.868	9.51007e-09	3	Tpi1
6.0122e-13	0.255889	0.835	0.737	1.03644e-08	3	Sf3b6
9.78807e-13	0.440508	0.367	0.237	1.68737e-08	3	Atf3
1.1068e-12	0.28349	0.783	0.648	1.90801e-08	3	Pnrc1
1.13407e-11	0.256065	0.859	0.768	1.95502e-07	3	Cox14
9.93298e-11	0.250333	0.869	0.795	1.71235e-06	3	Txn2
1.1791e-10	0.268013	0.721	0.597	2.03264e-06	3	Atxn10
2.80623e-10	0.277892	0.793	0.678	4.83766e-06	3	Uqcrc1
4.95087e-09	0.250258	0.665	0.558	8.5348e-05	3	Apex1
3.06101e-08	0.334549	0.753	0.634	0.000527688	3	Dcn
3.46413e-08	0.307912	0.765	0.709	0.000597181	3	H2afx
5.86039e-07	0.260604	0.775	0.679	0.0101027	3	Arl6ip1
4.0977e-06	0.332663	0.733	0.669	0.0706403	3	Hist1h2ap
2.69287e-05	0.317499	0.707	0.66	0.464224	3	Gm42418
0.000825789	0.275712	0.807	0.789	1	3	Egr1
2.14416e-266	1.68861	0.964	0.326	3.69631e-262	4	Notch2
1.10427e-230	1.85863	1	1	1.90365e-226	4	Actb
9.64011e-215	1.35677	0.928	0.339	1.66186e-210	4	Slc39a1
2.13509e-204	1.48621	0.992	0.696	3.68069e-200	4	Kdelr2
7.42864e-197	1.38582	1	0.848	1.28062e-192	4	Cbx3
1.39252e-184	1.53176	0.973	0.631	2.40056e-180	4	Nfia
6.97203e-152	1.10861	0.732	0.218	1.20191e-147	4	Spry2
4.8081e-148	0.801479	0.601	0.141	8.28869e-144	4	Abhd2
1.19726e-141	1.08588	0.867	0.413	2.06396e-137	4	Kdm6b
1.25533e-140	1.27893	0.998	0.821	2.16406e-136	4	Col1a1
7.74241e-139	1.33064	0.901	0.469	1.33471e-134	4	Runx1t1
5.04718e-121	0.783734	0.713	0.241	8.70083e-117	4	Rbm15
3.31171e-117	0.939622	0.914	0.589	5.70906e-113	4	Wtap
4.31937e-105	0.68464	0.614	0.197	7.44617e-101	4	Ric1
7.16952e-103	0.687962	0.591	0.186	1.23595e-98	4	Hsf2
3.05075e-93	0.8284	0.667	0.256	5.25919e-89	4	Insig1
8.48464e-84	0.843322	0.871	0.569	1.46267e-79	4	Dpysl2
1.06426e-81	1.01874	0.643	0.286	1.83467e-77	4	Pam
8.50816e-80	0.676765	0.679	0.299	1.46672e-75	4	Alkbh5
4.40344e-79	0.648445	0.69	0.307	7.59109e-75	4	Lrrc8a
1.04131e-78	0.92457	0.806	0.464	1.79511e-74	4	Ncam1
1.83615e-77	0.672077	0.838	0.484	3.16534e-73	4	Supt16
1.37703e-74	0.623129	1	1	2.37386e-70	4	Tubb5
1.99959e-72	0.738852	0.827	0.519	3.44709e-68	4	Ythdf2
2.17257e-71	0.640773	0.688	0.318	3.74529e-67	4	Marf1
8.50741e-71	0.660091	0.949	0.751	1.46659e-66	4	2022-09-02
1.35827e-69	0.807689	0.812	0.52	2.34152e-65	4	Pdcd4
1.70939e-69	0.486674	0.517	0.181	2.94682e-65	4	Zscan26
2.54382e-66	0.664576	0.692	0.34	4.38529e-62	4	Mn1
2.5623e-64	0.687401	0.612	0.282	4.41715e-60	4	Rpgrip1
2.48669e-63	0.679018	0.766	0.442	4.28681e-59	4	Myef2
1.27104e-59	0.575866	0.713	0.37	2.19115e-55	4	Mcmbp
1.00477e-57	0.360044	0.319	0.084	1.73212e-53	4	Gm26771
4.86124e-55	0.610775	0.658	0.341	8.38029e-51	4	Rap2b
2.88676e-52	0.409609	0.449	0.169	4.97649e-48	4	Sirt6
3.07033e-52	0.549689	0.686	0.386	5.29295e-48	4	Klhl9
4.5747e-52	0.501764	0.603	0.288	7.88632e-48	4	B4galt1
9.40152e-52	0.565628	0.911	0.774	1.62073e-47	4	Gnb1
2.77729e-51	0.436326	0.483	0.194	4.78778e-47	4	Kmt2d
2.97772e-50	0.319753	0.276	0.072	5.1333e-46	4	Fhl3
1.43179e-49	0.566778	0.743	0.453	2.46827e-45	4	Birc6
1.54084e-48	0.511302	0.989	0.85	2.65626e-44	4	Mfap2
2.32386e-48	0.283218	0.251	0.062	4.0061e-44	4	Tsku
1.06648e-45	0.53553	0.996	0.851	1.83851e-41	4	Col3a1
1.31047e-45	0.465892	0.435	0.175	2.25913e-41	4	Ttyh2
1.61814e-45	0.586587	0.802	0.587	2.78951e-41	4	Arglu1
5.54354e-45	0.629046	0.869	0.653	9.5565e-41	4	Gpc3
1.48463e-43	0.542255	0.92	0.722	2.55936e-39	4	Fstl1
1.82127e-43	0.506688	0.766	0.507	3.13969e-39	4	Otub1
3.62552e-42	0.459852	0.989	0.861	6.25003e-38	4	Col1a2
1.30499e-40	0.546253	0.359	0.138	2.24968e-36	4	Tbx3os1
1.39291e-40	0.500233	0.84	0.663	2.40124e-36	4	Gsk3b
7.60865e-40	0.372841	0.43	0.181	1.31165e-35	4	Ncoa3
3.57043e-38	0.47637	0.869	0.691	6.15506e-34	4	Ssr1
3.76802e-38	0.400249	0.485	0.227	6.49569e-34	4	Paip1
2.72416e-36	0.596636	0.751	0.502	4.69618e-32	4	Osr1
3.12725e-36	0.576381	0.728	0.488	5.39106e-32	4	Efna5
3.3857e-34	0.405852	0.521	0.278	5.83661e-30	4	Dctn4
1.57916e-33	0.509941	0.745	0.498	2.72231e-29	4	Twist2
2.41896e-33	0.306785	0.384	0.163	4.17004e-29	4	Uvssa
6.20475e-33	0.59726	0.914	0.816	1.06964e-28	4	Crabp1
1.11365e-32	0.47905	0.905	0.68	1.91983e-28	4	Prrx1
1.21939e-32	0.43506	0.992	0.915	2.10211e-28	4	Marcks
1.38208e-32	0.377269	1	1	2.38258e-28	4	Malat1
1.01351e-31	0.371384	1	1	1.7472e-27	4	Lgals1
2.51131e-31	0.457977	0.998	0.994	4.32924e-27	4	Meg3
1.38247e-30	0.362394	0.473	0.237	2.38325e-26	4	Pfas
3.92112e-30	0.340477	1	0.983	6.75962e-26	4	Mdk
9.96363e-30	0.371712	0.962	0.897	1.71763e-25	4	St13
1.77672e-29	0.377174	0.378	0.172	3.0629e-25	4	Jag1
3.61246e-29	0.264884	0.304	0.12	6.22752e-25	4	Zbtb44
5.59856e-29	0.47456	0.568	0.349	9.65136e-25	4	Slc24a5
8.57537e-29	0.482781	0.895	0.781	1.47831e-24	4	Sox11
1.20846e-28	0.408076	0.627	0.397	2.08326e-24	4	Yme1l1
5.70858e-28	0.575435	0.787	0.572	9.84102e-24	4	Sfrp2
1.06366e-27	0.390975	0.648	0.427	1.83365e-23	4	Tmem263
1.35371e-27	0.411411	0.77	0.535	2.33367e-23	4	Lum
2.73793e-27	0.30231	0.443	0.226	4.71992e-23	4	Mtmr2
1.1855e-26	0.391523	0.709	0.466	2.04369e-22	4	Cdh11
4.58287e-26	0.26482	0.308	0.132	7.90041e-22	4	Tram2
5.72502e-26	0.321194	0.361	0.169	9.86937e-22	4	Gm26523
1.94402e-25	0.3993	0.863	0.655	3.3513e-21	4	Bgn
2.5008e-25	0.371101	0.688	0.468	4.31112e-21	4	Whsc1l1
3.32201e-25	0.362924	0.608	0.365	5.72681e-21	4	Wnt5a
6.38483e-25	0.389129	0.791	0.589	1.10068e-20	4	Gm13305
1.33875e-24	0.322605	0.966	0.873	2.30787e-20	4	Dlk1
1.68405e-23	0.411997	0.979	0.932	2.90313e-19	4	Ptn
1.77064e-23	0.362307	0.69	0.493	3.05241e-19	4	Gatad1
1.78189e-23	0.388355	0.819	0.605	3.07179e-19	4	Fbn2
1.85907e-23	0.320598	0.937	0.858	3.20486e-19	4	Map1lc3a
2.93619e-23	0.386635	0.432	0.238	5.06169e-19	4	Pdpn
8.29934e-23	0.278618	0.325	0.153	1.43072e-18	4	2022-09-10
9.1849e-23	0.424536	0.555	0.352	1.58338e-18	4	Bend5
9.61098e-23	0.260024	0.285	0.126	1.65684e-18	4	Cdkn1b
1.87629e-22	0.373508	0.886	0.779	3.23454e-18	4	Srsf2
6.09157e-22	0.417378	0.907	0.811	1.05013e-17	4	Tcf4
2.80445e-21	0.320388	0.722	0.499	4.83459e-17	4	Cdo1
2.8157e-21	0.316125	0.369	0.19	4.85398e-17	4	Pantr1
3.65945e-21	0.335279	0.384	0.207	6.30853e-17	4	Lgr4
4.88667e-21	0.332125	0.525	0.311	8.42413e-17	4	Nkd1
1.11067e-20	0.372034	0.844	0.662	1.91469e-16	4	6330403K07Rik
1.23528e-20	0.443128	0.66	0.469	2.12949e-16	4	Cxcl12
2.0736e-20	0.272392	1	0.986	3.57468e-16	4	Ifitm2
3.06099e-20	0.273728	0.992	0.973	5.27683e-16	4	Srrm2
3.15812e-20	0.346484	0.582	0.403	5.44428e-16	4	Golt1b
5.36274e-20	0.411586	0.707	0.511	9.24483e-16	4	Ebf1
7.35606e-20	0.316358	0.935	0.865	1.26811e-15	4	Igfbp4
1.56048e-19	0.324731	0.871	0.702	2.6901e-15	4	Eva1b
2.6693e-19	0.308253	0.451	0.258	4.6016e-15	4	Epha3
2.63092e-18	0.413469	0.698	0.51	4.53544e-14	4	Igf1
2.69799e-18	0.279608	0.454	0.266	4.65106e-14	4	Dnm3os
2.848e-18	0.293889	0.762	0.56	4.90967e-14	4	Col5a2
3.88526e-18	0.306002	0.722	0.522	6.6978e-14	4	Col6a2
4.22807e-18	0.299069	0.43	0.253	7.28876e-14	4	Egfl6
7.10436e-18	0.405862	0.492	0.308	1.22472e-13	4	Dkk2
8.74767e-18	0.382044	0.764	0.609	1.50801e-13	4	Tshz2
1.93516e-17	0.334327	0.785	0.607	3.33602e-13	4	Ahnak
2.76951e-17	0.262139	0.34	0.185	4.77435e-13	4	Pabpc4l
4.58574e-17	0.378604	0.527	0.341	7.90535e-13	4	Fibin
8.83293e-17	0.335707	0.555	0.366	1.52271e-12	4	Mab21l2
1.00491e-16	0.328653	0.593	0.42	1.73237e-12	4	Plpp3
1.05637e-16	0.301131	0.38	0.214	1.82108e-12	4	Pax3
1.40669e-16	0.280247	0.485	0.314	2.425e-12	4	Slc25a36
2.04817e-16	0.286979	0.489	0.312	3.53084e-12	4	Shox2
3.3084e-16	0.37213	0.681	0.497	5.70336e-12	4	Nrp1
4.77567e-16	0.252893	0.424	0.259	8.23277e-12	4	Pan3
4.54042e-15	0.30242	0.568	0.391	7.82722e-11	4	Osr2
5.2698e-15	0.302971	0.764	0.604	9.08461e-11	4	Snhg18
7.31768e-15	0.337036	0.848	0.752	1.26149e-10	4	Auts2
9.05253e-15	0.40438	0.829	0.695	1.56057e-10	4	Crip1
1.09086e-14	0.262323	0.857	0.765	1.88053e-10	4	Sfpq
1.6672e-14	0.286839	0.635	0.454	2.87409e-10	4	Zfhx4
2.53692e-14	0.422137	0.54	0.396	4.3734e-10	4	Trps1
2.74507e-14	0.263404	0.907	0.827	4.73223e-10	4	Gm1673
2.7744e-14	0.297264	0.922	0.824	4.78278e-10	4	Nfib
2.80156e-14	0.274589	0.829	0.768	4.82961e-10	4	Rhoa
3.08242e-14	0.334199	0.494	0.337	5.31379e-10	4	Slc1a3
4.41165e-14	0.284005	0.692	0.538	7.60525e-10	4	Thra
5.76441e-14	0.298344	0.631	0.486	9.93726e-10	4	Nfix
6.61488e-14	0.302239	0.741	0.598	1.14034e-09	4	Mfap4
7.49241e-14	0.259012	0.435	0.283	1.29162e-09	4	Fam3c
9.06326e-14	0.267068	0.641	0.477	1.56242e-09	4	Lpar1
1.02841e-13	0.279821	0.603	0.448	1.77288e-09	4	Igsf3
1.39798e-13	0.333545	0.787	0.643	2.40997e-09	4	Vcan
1.43354e-13	0.258019	0.932	0.841	2.47127e-09	4	Chd3
1.59726e-13	0.380958	0.511	0.365	2.75351e-09	4	Nr2f2
1.72326e-13	0.286646	0.688	0.543	2.97072e-09	4	Nbl1
2.00113e-13	0.287511	0.671	0.52	3.44974e-09	4	Gas1
9.61305e-13	0.254876	0.513	0.352	1.65719e-08	4	Pdgfra
1.0249e-12	0.256498	0.401	0.251	1.76683e-08	4	Nr2f1
1.19984e-12	0.254009	0.658	0.491	2.06841e-08	4	Clmp
1.80775e-12	0.253685	0.947	0.867	3.11638e-08	4	Peg3
4.38113e-12	0.277366	0.635	0.486	7.55263e-08	4	Col6a1
8.20202e-12	0.279619	0.551	0.404	1.41395e-07	4	Creb5
1.0449e-11	0.289934	0.793	0.676	1.80131e-07	4	Cyr61
1.36131e-11	0.286469	0.662	0.543	2.34676e-07	4	Map1b
1.42656e-11	0.287076	0.312	0.192	2.45924e-07	4	Cdca2
4.97609e-11	0.256295	0.945	0.88	8.57828e-07	4	Tsc22d1
1.84735e-10	0.335538	0.69	0.583	3.18465e-06	4	Zfhx3
2.07437e-10	0.258663	0.591	0.459	3.57601e-06	4	Klf4
2.15276e-10	0.276938	0.487	0.347	3.71115e-06	4	Msx1
2.42639e-10	0.254241	0.962	0.91	4.18285e-06	4	Fos
1.6877e-09	0.258215	0.658	0.543	2.90943e-05	4	Col26a1
3.17362e-09	0.252094	0.686	0.587	5.47101e-05	4	Clk1
4.23674e-09	0.287857	0.631	0.524	7.30371e-05	4	Tcf7l2
7.34932e-07	0.258645	0.359	0.258	0.0126695	4	Rgcc
0	1.569	0.657	0.046	0	5	S100a14
5.1438e-238	2.58747	0.917	0.211	8.8674e-234	5	Sfn
8.46601e-210	1.42083	0.763	0.132	1.45946e-205	5	Dsp
1.52536e-203	0.710765	0.397	0.025	2.62958e-199	5	Pvrl4
1.22608e-201	0.857187	0.564	0.062	2.11364e-197	5	Trim29
5.43165e-198	0.616949	0.333	0.015	9.36361e-194	5	Nkx2-3
4.48128e-195	0.547386	0.292	0.01	7.72527e-191	5	Zfp750
1.82635e-192	0.68102	0.375	0.023	3.14845e-188	5	Dsc3
2.10671e-187	1.35873	0.481	0.048	3.63175e-183	5	Tacstd2
5.2043e-179	2.43025	0.907	0.267	8.9717e-175	5	Perp
4.5941e-175	2.01054	0.811	0.193	7.91976e-171	5	Krt5
6.45479e-172	1.22721	0.747	0.151	1.11274e-167	5	Fxyd3
8.06982e-167	1.20196	0.801	0.174	1.39116e-162	5	Epcam
1.79283e-166	1.19218	0.439	0.045	3.09066e-162	5	Dapl1
1.89247e-165	1.24987	0.846	0.214	3.26243e-161	5	Spint2
4.0629e-165	1.33135	0.647	0.118	7.00404e-161	5	Klf5
1.5436e-162	0.813798	0.42	0.04	2.66101e-158	5	Cldn4
3.78113e-157	0.443889	0.25	0.01	6.51829e-153	5	Aqp3
9.86164e-157	0.780791	0.471	0.056	1.70005e-152	5	Rab25
2.18519e-156	1.56376	0.548	0.085	3.76705e-152	5	Gm16136
1.90306e-152	0.7489	0.333	0.025	3.28068e-148	5	Rhov
5.18207e-143	0.702035	0.468	0.061	8.93338e-139	5	Esrp1
1.29104e-140	0.533839	0.33	0.027	2.22562e-136	5	Pkp1
7.26487e-140	0.674159	0.452	0.057	1.25239e-135	5	Cdh1
2.34668e-139	0.487552	0.362	0.034	4.04544e-135	5	Lad1
6.88283e-139	0.592241	0.253	0.013	1.18653e-134	5	Upk3bl
3.12323e-134	0.667597	0.41	0.048	5.38413e-130	5	Cldn6
1.96772e-126	1.12042	0.391	0.048	3.39216e-122	5	Krt19
6.45428e-117	0.608685	0.494	0.084	1.11265e-112	5	Irf6
9.1451e-114	0.459517	0.349	0.04	1.57652e-109	5	Dsg2
3.79887e-111	0.911349	0.689	0.185	6.54887e-107	5	Capg
1.54526e-110	0.739107	0.561	0.118	2.66388e-106	5	Ezr
5.65591e-109	0.766754	0.494	0.091	9.75022e-105	5	Ikzf2
2.70236e-107	0.627454	0.497	0.092	4.65859e-103	5	Lsr
3.66675e-104	1.48921	0.776	0.286	6.32111e-100	5	S100a16
4.88686e-102	0.770245	0.548	0.124	8.42446e-98	5	Kctd1
8.52599e-102	1.7913	0.843	0.389	1.4698e-97	5	Krt14
4.94804e-99	0.835136	0.391	0.063	8.52993e-95	5	Nebl
5.01832e-99	2.06479	0.51	0.116	8.65108e-95	5	Krt17
1.13904e-95	1.08662	0.478	0.099	1.96359e-91	5	Krt18
3.38565e-95	0.723174	0.5	0.102	5.83653e-91	5	4631405K08Rik
9.62695e-92	0.950506	1	0.973	1.65959e-87	5	Atox1
1.05207e-90	0.687403	0.378	0.062	1.81366e-86	5	Nrarp
7.61378e-90	1.04982	0.628	0.195	1.31254e-85	5	Jup
1.05136e-88	1.22826	1	0.975	1.81244e-84	5	S100a11
2.27416e-87	0.470894	0.375	0.062	3.92042e-83	5	Pkp3
2.85724e-86	0.33125	0.25	0.026	4.92559e-82	5	Spint1
1.1076e-81	2.75765	0.689	0.282	1.9094e-77	5	Krt15
1.31083e-80	1.01124	0.84	0.404	2.25974e-76	5	Ptprf
2.12786e-79	1.35014	0.548	0.158	3.66822e-75	5	Anxa1
4.73837e-78	0.394977	0.253	0.031	8.16847e-74	5	Tmem79
8.37492e-76	0.587461	0.484	0.117	1.44375e-71	5	Fermt1
1.55482e-73	1.22041	0.692	0.276	2.68035e-69	5	Cd9
7.80446e-73	0.658458	0.356	0.07	1.34541e-68	5	Smtnl2
1.20845e-70	1.01212	0.279	0.044	2.08324e-66	5	Dmkn
1.27552e-69	0.689877	0.615	0.199	2.19887e-65	5	Bcam
1.35164e-69	0.537083	0.282	0.044	2.33009e-65	5	Fgfbp1
2.44169e-68	0.609412	0.542	0.164	4.20922e-64	5	Mapk13
5.54205e-68	1.61822	0.974	0.909	9.55393e-64	5	Fabp5
2.24556e-66	0.688013	0.468	0.129	3.87113e-62	5	Ablim1
3.91412e-66	1.04791	0.978	0.875	6.74755e-62	5	Dstn
5.67175e-65	2.2116	0.76	0.412	9.77752e-61	5	Hspb1
4.50095e-63	1.02874	0.333	0.07	7.75919e-59	5	Krt1
8.30654e-63	0.42283	0.321	0.062	1.43196e-58	5	Mpzl2
6.28903e-61	0.718189	0.468	0.139	1.08417e-56	5	Hebp2
1.20708e-57	0.968424	0.728	0.365	2.08089e-53	5	Gja1
1.79189e-56	0.31317	0.276	0.05	3.08904e-52	5	Arhgef19
8.54949e-56	0.551589	0.407	0.112	1.47385e-51	5	Limk2
5.27898e-55	2.76297	0.433	0.142	9.10043e-51	5	Krtdap
7.08981e-54	0.302523	0.256	0.045	1.22221e-49	5	Tmem54
1.07613e-53	0.413493	0.353	0.085	1.85515e-49	5	Slc9a3r1
7.77531e-53	0.958121	0.628	0.279	1.34039e-48	5	Acaa2
9.15228e-53	0.956151	0.41	0.119	1.57776e-48	5	Pitx2
1.58241e-51	1.24633	0.686	0.328	2.72792e-47	5	Lgals7
3.60017e-51	0.346157	0.324	0.074	6.20634e-47	5	Acer2
4.66499e-51	0.531659	0.587	0.216	8.04198e-47	5	Tpd52
1.40613e-50	0.747633	0.468	0.15	2.42402e-46	5	Barx2
7.21901e-50	0.407144	0.378	0.101	1.24448e-45	5	F11r
1.82335e-49	0.960265	0.901	0.7	3.14328e-45	5	Cstb
4.45535e-47	0.410594	0.362	0.096	7.68059e-43	5	Trp63
5.10086e-47	0.432718	0.413	0.125	8.79337e-43	5	Igsf9
5.63464e-47	0.405164	0.362	0.099	9.71355e-43	5	Stard10
1.25896e-46	0.46186	0.288	0.066	2.17033e-42	5	Smagp
3.30662e-46	0.525593	0.484	0.171	5.70028e-42	5	Wnt4
3.76946e-46	0.492288	0.487	0.169	6.49817e-42	5	Acot1
3.49797e-45	0.310517	0.288	0.066	6.03015e-41	5	Kdf1
1.31045e-44	0.793967	0.308	0.079	2.25909e-40	5	Krt8
1.55665e-44	0.679784	0.837	0.51	2.6835e-40	5	Foxp1
1.75044e-44	0.429434	0.285	0.068	3.01759e-40	5	Hspb8
2.16717e-44	0.383654	0.282	0.067	3.73599e-40	5	Rab3d
1.79219e-43	0.387432	0.369	0.106	3.08956e-39	5	Rab38
2.59449e-43	0.410549	0.269	0.062	4.47264e-39	5	Gata3
2.8166e-43	0.716595	0.968	0.835	4.85554e-39	5	Itm2b
7.33461e-42	0.673308	0.798	0.509	1.26441e-37	5	Cyb5r3
8.02672e-42	0.686553	0.962	0.773	1.38373e-37	5	Cd24a
3.89838e-40	0.319183	0.253	0.058	6.72042e-36	5	Fam84a
4.19894e-40	0.946015	0.439	0.168	7.23855e-36	5	Wfdc2
7.84138e-40	0.41739	0.256	0.06	1.35178e-35	5	Isl1
1.57663e-39	0.540448	0.548	0.229	2.71795e-35	5	Pdlim1
1.84231e-39	0.366594	0.333	0.096	3.17596e-35	5	Cxadr
3.67007e-39	1.02645	0.673	0.391	6.32684e-35	5	Gltp
3.86607e-39	0.411604	0.34	0.101	6.66472e-35	5	Ndrg2
9.96795e-39	0.730036	0.59	0.291	1.71837e-34	5	Pycard
2.64602e-38	0.656971	0.638	0.339	4.56148e-34	5	Rnh1
3.78332e-38	0.745289	0.465	0.194	6.52207e-34	5	Notch1
3.4447e-36	0.463835	0.33	0.102	5.93832e-32	5	Lmo7
8.38353e-36	0.418246	0.423	0.157	1.44524e-31	5	Fras1
1.37432e-35	0.887018	0.875	0.713	2.36919e-31	5	Ralbp1
2.17413e-35	0.334851	0.282	0.078	3.74799e-31	5	Ptpn13
3.86925e-35	0.308046	0.279	0.076	6.67019e-31	5	Mycl
4.6578e-35	0.792174	0.728	0.423	8.02959e-31	5	Mt1
8.9734e-35	0.425028	0.455	0.179	1.54692e-30	5	Klk8
1.34235e-34	0.579108	0.878	0.665	2.31409e-30	5	Vamp8
2.81166e-34	0.480908	0.603	0.303	4.84703e-30	5	Cux1
4.86937e-34	0.308757	0.301	0.088	8.39431e-30	5	Pltp
5.27689e-34	0.349117	0.288	0.083	9.09682e-30	5	Tfap2a
5.38305e-34	0.630962	0.917	0.76	9.27983e-30	5	Pgam1
6.13656e-34	0.474113	0.481	0.19	1.05788e-29	5	Wnt6
9.55837e-34	0.531012	0.603	0.306	1.64777e-29	5	Fam60a
1.59102e-31	0.507146	0.33	0.112	2.74275e-27	5	Apoc1
1.74566e-31	0.480684	0.462	0.191	3.00934e-27	5	Cdkn1a
4.90371e-31	0.691149	0.779	0.518	8.4535e-27	5	Ifitm3
7.34581e-31	0.314213	0.321	0.105	1.26634e-26	5	Polr3g
1.26274e-30	1.37916	0.529	0.281	2.17684e-26	5	Mgst1
2.39567e-30	0.555628	0.772	0.518	4.12989e-26	5	Vps36
4.57235e-30	0.697223	0.683	0.411	7.88227e-26	5	Pdgfa
4.79332e-30	0.396848	1	0.995	8.26321e-26	5	Serbp1
2.06974e-28	0.374373	1	1	3.56803e-24	5	Ptma
3.06891e-28	0.686362	0.497	0.23	5.29049e-24	5	Mt2
3.79992e-28	0.580563	0.753	0.54	6.55068e-24	5	Rab11a
6.02319e-28	0.599941	0.958	0.926	1.03834e-23	5	Dbi
1.31587e-27	0.331869	0.343	0.127	2.26842e-23	5	Slc2a1
1.38285e-27	0.499467	0.256	0.08	2.38389e-23	5	Ndufa4l2
6.65065e-27	0.568306	0.846	0.673	1.14651e-22	5	Mdh1
8.69558e-27	0.42286	0.413	0.183	1.49903e-22	5	Hacd2
1.73006e-26	0.292873	0.288	0.096	2.98245e-22	5	Wnt7b
5.22361e-26	0.439989	0.558	0.305	9.00499e-22	5	1500011K16Rik
7.85311e-26	0.400549	0.503	0.242	1.3538e-21	5	Nrtn
1.70141e-25	0.303279	0.324	0.12	2.93307e-21	5	Gstm2
3.67514e-25	0.455466	0.59	0.334	6.33557e-21	5	Hras
4.02044e-25	0.628661	0.881	0.735	6.93084e-21	5	Fam162a
4.02322e-25	0.281372	0.263	0.086	6.93562e-21	5	Kcnk1
7.34061e-25	0.639317	0.952	0.885	1.26545e-20	5	Anxa2
9.59654e-25	0.39636	0.481	0.23	1.65435e-20	5	Tspan13
5.27963e-24	0.275204	0.272	0.095	9.10156e-20	5	Pvrl1
5.95441e-24	0.378441	0.442	0.208	1.02648e-19	5	Mgst3
8.18355e-24	0.31179	1	1	1.41076e-19	5	H3f3b
1.66631e-23	0.601972	0.801	0.6	2.87256e-19	5	Meis2
2.88629e-23	0.443585	0.558	0.31	4.97567e-19	5	Hist3h2ba
5.72635e-23	0.554472	0.981	0.926	9.87165e-19	5	Pkm
7.98096e-23	0.474188	0.814	0.632	1.37584e-18	5	Hdgf
5.69035e-22	0.388326	0.519	0.291	9.80959e-18	5	Taf13
5.77319e-22	0.741659	0.702	0.493	9.9524e-18	5	Hes1
7.44631e-22	0.287738	0.321	0.129	1.28367e-17	5	Elf1
1.47289e-21	0.256281	0.327	0.132	2.53911e-17	5	Tmem238
1.72354e-21	0.263229	0.279	0.104	2.97121e-17	5	Rab15
2.3941e-21	0.252323	0.375	0.161	4.12719e-17	5	Col18a1
2.4745e-21	0.301837	0.298	0.116	4.26579e-17	5	Metrnl
3.34069e-21	0.30349	0.391	0.178	5.75902e-17	5	Cd151
4.00844e-21	0.311166	0.304	0.124	6.91015e-17	5	Tiam1
7.1245e-21	0.53307	0.574	0.364	1.22819e-16	5	Iqgap1
9.19475e-21	0.524656	0.538	0.305	1.58508e-16	5	Alcam
3.93341e-20	0.399373	0.997	0.984	6.7808e-16	5	Prdx1
1.20774e-19	0.318627	0.33	0.145	2.08202e-15	5	Emp2
1.47927e-19	0.341544	0.388	0.181	2.55011e-15	5	Chchd10
4.26531e-19	0.391148	0.542	0.324	7.35297e-15	5	Cdc42se1
6.27428e-19	0.323271	0.349	0.161	1.08162e-14	5	Pon2
6.77124e-19	0.356186	0.516	0.294	1.16729e-14	5	Sdc4
6.80088e-19	0.561961	0.679	0.471	1.1724e-14	5	Pitx1
6.81404e-19	0.639671	0.846	0.678	1.17467e-14	5	Arl6ip1
7.92598e-19	0.472481	0.593	0.382	1.36636e-14	5	Sdc1
1.23542e-18	0.445325	0.933	0.87	2.12974e-14	5	Tpi1
1.54176e-18	0.35613	0.522	0.299	2.65784e-14	5	Hprt
2.63208e-18	0.39077	0.814	0.625	4.53743e-14	5	Psma1
3.45605e-18	0.253286	0.285	0.119	5.95788e-14	5	Ssx2ip
4.86911e-18	0.394309	0.474	0.267	8.39386e-14	5	Ddit4
5.33031e-18	0.445633	0.859	0.724	9.18893e-14	5	H2afj
8.13093e-18	0.370864	0.66	0.438	1.40169e-13	5	Hadh
1.0753e-17	0.284594	0.987	0.981	1.85372e-13	5	Atp5d
1.21768e-17	0.306303	1	0.981	2.09916e-13	5	Uqcr11
1.9942e-17	0.355268	0.455	0.258	3.4378e-13	5	Gcat
2.30346e-17	0.336929	0.574	0.357	3.97093e-13	5	Etfa
2.47768e-17	0.403883	0.91	0.819	4.27127e-13	5	Tecr
2.96594e-17	0.380684	0.599	0.392	5.11298e-13	5	Trappc6a
4.68061e-17	0.353149	0.471	0.27	8.0689e-13	5	Mark2
5.05082e-17	0.259424	0.279	0.119	8.70711e-13	5	Sult5a1
8.4348e-17	0.264724	0.295	0.13	1.45408e-12	5	Ece1
8.82512e-17	0.462928	0.965	0.927	1.52136e-12	5	Ldha
1.61846e-16	0.253258	0.314	0.144	2.79007e-12	5	Dnase2a
1.69279e-16	0.301693	0.612	0.383	2.9182e-12	5	Dazap2
1.95032e-16	0.362742	0.667	0.487	3.36215e-12	5	Scp2
2.01298e-16	0.360438	0.869	0.702	3.47018e-12	5	Llph
2.28454e-16	0.358124	0.901	0.776	3.93832e-12	5	G3bp1
2.36132e-16	0.445548	0.353	0.18	4.07068e-12	5	Jag1
2.39005e-16	0.264829	1	0.995	4.1202e-12	5	Marcksl1
2.52132e-16	0.368598	0.984	0.949	4.34651e-12	5	Psma7
2.66832e-16	0.288328	0.446	0.243	4.59992e-12	5	Exosc7
3.60827e-16	0.317585	0.904	0.809	6.2203e-12	5	Mrpl23
3.8665e-16	0.82429	0.49	0.317	6.66546e-12	5	Krt10
4.04765e-16	0.513014	0.644	0.437	6.97774e-12	5	Emp1
4.56655e-16	0.394946	0.686	0.481	7.87227e-12	5	Kdm5b
4.69827e-16	0.286501	0.401	0.211	8.09936e-12	5	Mitd1
4.70216e-16	0.317129	1	0.999	8.10606e-12	5	Mif
5.00549e-16	0.391502	0.452	0.268	8.62896e-12	5	Tgif1
6.24867e-16	0.342794	0.407	0.22	1.07721e-11	5	Pfkl
7.87294e-16	0.346771	0.346	0.173	1.35722e-11	5	Arl4c
8.71523e-16	0.26347	0.497	0.282	1.50242e-11	5	Msi2
1.13808e-15	0.364844	0.465	0.28	1.96194e-11	5	Cpne3
1.18189e-15	0.377128	0.878	0.739	2.03745e-11	5	Psma2
1.23e-15	0.330082	0.276	0.125	2.1204e-11	5	Dhrs3
1.2574e-15	0.281347	1	0.997	2.16763e-11	5	Eif5a
1.34593e-15	0.310531	0.702	0.478	2.32024e-11	5	Bcl11a
1.79612e-15	0.399492	0.821	0.657	3.09633e-11	5	Pa2g4
2.20624e-15	0.384403	0.859	0.731	3.80333e-11	5	1810037I17Rik
2.46948e-15	0.383652	0.833	0.679	4.25714e-11	5	Uqcrc1
3.26983e-15	0.34757	0.696	0.495	5.63687e-11	5	Bex1
4.10223e-15	0.362252	0.551	0.36	7.07184e-11	5	Alad
4.19204e-15	0.351145	0.542	0.346	7.22666e-11	5	Atp1b3
5.99478e-15	0.281165	0.471	0.27	1.03344e-10	5	Ank3
7.23733e-15	0.32008	0.946	0.895	1.24764e-10	5	Polr1d
7.70473e-15	0.262828	0.314	0.152	1.32822e-10	5	Mllt4
1.03254e-14	0.35919	0.84	0.71	1.77999e-10	5	Psmd7
1.18265e-14	0.267581	0.994	0.984	2.03878e-10	5	Ywhae
1.48052e-14	0.291831	0.34	0.171	2.55227e-10	5	Mafb
1.91291e-14	0.323247	0.587	0.385	3.29766e-10	5	Hdac1
2.66241e-14	0.330644	0.865	0.738	4.58972e-10	5	Cyb5a
3.17784e-14	0.274028	0.577	0.368	5.47828e-10	5	Eef1e1
4.72898e-14	0.295	0.519	0.324	8.15229e-10	5	Cd2ap
5.61225e-14	0.289277	0.353	0.187	9.67496e-10	5	Ormdl2
6.61223e-14	0.289744	0.974	0.931	1.13988e-09	5	Cnbp
6.78435e-14	0.335262	0.894	0.777	1.16955e-09	5	Cst3
7.06238e-14	0.282569	0.436	0.252	1.21748e-09	5	Tmem123
7.72471e-14	0.275985	0.997	0.994	1.33166e-09	5	Prdx2
8.47401e-14	0.377017	0.718	0.554	1.46083e-09	5	Ktn1
1.06599e-13	0.478011	0.369	0.206	1.83765e-09	5	Cadm1
1.53703e-13	0.306589	0.311	0.156	2.64969e-09	5	Npnt
1.74709e-13	0.286658	0.958	0.909	3.0118e-09	5	Atp6v1g1
2.02678e-13	0.303471	0.468	0.29	3.49397e-09	5	Nudt14
2.02767e-13	0.323117	0.705	0.524	3.49549e-09	5	Aamp
2.10381e-13	0.305004	0.968	0.936	3.62675e-09	5	S100a10
2.8939e-13	0.310423	0.728	0.564	4.98879e-09	5	Psap
3.68254e-13	0.331761	0.628	0.454	6.34832e-09	5	Ppil1
4.1801e-13	0.314932	0.795	0.626	7.20607e-09	5	Pgrmc1
4.76878e-13	0.327076	0.676	0.516	8.22089e-09	5	Polr3k
5.63091e-13	0.302202	0.417	0.248	9.70713e-09	5	Dynlt3
5.65634e-13	0.342612	0.782	0.635	9.75096e-09	5	Psma6
7.59001e-13	0.306505	0.929	0.852	1.30844e-08	5	Anp32a
8.2823e-13	0.32774	0.84	0.729	1.42779e-08	5	Prdx6
8.61915e-13	0.309908	0.596	0.404	1.48585e-08	5	Bex4
8.76593e-13	0.302723	0.465	0.292	1.51116e-08	5	Smarcd2
8.87143e-13	0.314759	0.917	0.814	1.52935e-08	5	Atp6v1f
9.21366e-13	0.337245	0.75	0.591	1.58834e-08	5	Nras
2.58764e-12	0.309423	0.798	0.65	4.46082e-08	5	Spcs2
2.79667e-12	0.274234	0.99	0.979	4.82119e-08	5	Cox7a2l
3.17091e-12	0.379365	0.647	0.536	5.46634e-08	5	Gipc1
3.29323e-12	0.255253	0.298	0.155	5.67721e-08	5	Fam63b
3.51704e-12	0.270487	0.647	0.449	6.06302e-08	5	Plp2
3.7784e-12	0.428959	0.859	0.779	6.51359e-08	5	Eno1
3.84331e-12	0.354779	0.599	0.422	6.62547e-08	5	Fdps
3.92741e-12	0.290016	0.962	0.926	6.77046e-08	5	Psmb6
3.97855e-12	0.277191	0.853	0.692	6.85861e-08	5	Abracl
4.52528e-12	0.263315	0.33	0.18	7.80113e-08	5	Errfi1
5.57344e-12	0.456383	0.397	0.24	9.60805e-08	5	Atf3
6.63386e-12	0.921422	0.67	0.574	1.14361e-07	5	Igfbp5
6.72302e-12	0.278095	0.381	0.223	1.15898e-07	5	Hist3h2a
7.2715e-12	0.263021	0.468	0.296	1.25353e-07	5	Ist1
1.05184e-11	0.277657	0.676	0.497	1.81327e-07	5	Psmc5
1.10895e-11	0.261329	0.901	0.786	1.91172e-07	5	Skp1a
1.17054e-11	0.337941	0.67	0.534	2.0179e-07	5	Fam32a
1.19147e-11	0.270662	0.955	0.889	2.05397e-07	5	Polr2f
1.20428e-11	0.367635	0.853	0.74	2.07606e-07	5	Sf3b6
1.43148e-11	0.250566	0.994	0.99	2.46772e-07	5	Srsf3
1.94094e-11	0.31274	0.59	0.399	3.34599e-07	5	Bcl11b
1.96837e-11	0.284745	0.894	0.752	3.39326e-07	5	Fkbp4
1.99629e-11	0.296843	0.429	0.264	3.44141e-07	5	Ier5
2.2825e-11	0.326177	0.468	0.311	3.9348e-07	5	Pgap2
2.75543e-11	0.28344	0.548	0.373	4.75008e-07	5	Sypl
3.02156e-11	0.308209	0.452	0.293	5.20888e-07	5	Tet3
3.28623e-11	0.253143	0.474	0.305	5.66513e-07	5	Nsun2
3.43598e-11	0.272475	0.522	0.353	5.92328e-07	5	Pard6g
3.52819e-11	0.284534	0.881	0.8	6.08224e-07	5	Srsf5
4.04462e-11	0.295363	0.561	0.393	6.97251e-07	5	Psmd12
4.32873e-11	0.252501	0.955	0.914	7.4623e-07	5	Pomp
5.72333e-11	0.303009	0.92	0.867	9.86645e-07	5	Hnrnpf
6.08242e-11	0.258456	0.962	0.906	1.04855e-06	5	Hnrnpab
6.69553e-11	0.272659	0.881	0.77	1.15424e-06	5	Cox14
7.97498e-11	0.274863	0.853	0.735	1.37481e-06	5	Hmgb3
8.32405e-11	0.261857	0.583	0.417	1.43498e-06	5	Zfp664
1.10083e-10	0.296725	0.795	0.666	1.89772e-06	5	Dynll2
1.1205e-10	0.320735	0.51	0.358	1.93164e-06	5	Atp6v1d
1.72701e-10	0.279066	0.494	0.334	2.97719e-06	5	Net1
2.40918e-10	0.290048	0.907	0.825	4.15318e-06	5	Ndufa12
2.64591e-10	0.253596	0.654	0.483	4.56128e-06	5	Sae1
2.99818e-10	0.256015	0.42	0.27	5.16857e-06	5	Cltb
3.89308e-10	0.299846	0.978	0.953	6.71128e-06	5	Atp5b
5.21711e-10	0.394224	0.667	0.526	8.99378e-06	5	Tubb4b
6.87624e-10	0.252498	0.455	0.299	1.18539e-05	5	Atp1a1
7.16478e-10	0.367123	0.442	0.309	1.23514e-05	5	Klf3
7.48827e-10	0.262345	0.907	0.818	1.2909e-05	5	Npm3
8.09609e-10	0.277713	0.522	0.367	1.39568e-05	5	Cdk2ap2
1.07934e-09	0.255903	0.606	0.444	1.86067e-05	5	Hint2
1.31901e-09	0.284426	0.715	0.568	2.27384e-05	5	Ube2e1
1.37593e-09	0.268034	0.619	0.469	2.37197e-05	5	Psmc6
1.67324e-09	0.268259	0.615	0.458	2.8845e-05	5	Wls
1.72784e-09	0.279292	0.42	0.278	2.97863e-05	5	Acly
1.85341e-09	0.319239	0.253	0.138	3.1951e-05	5	Fst
2.56995e-09	0.275346	0.888	0.788	4.43034e-05	5	Ywhaz
2.78858e-09	0.26079	0.965	0.922	4.80723e-05	5	Hn1
2.81467e-09	0.274825	0.673	0.523	4.85221e-05	5	Amotl1
2.86562e-09	0.262905	0.571	0.434	4.94005e-05	5	Cnot7
3.13536e-09	0.290152	0.929	0.832	5.40504e-05	5	Srsf7
3.75697e-09	0.258849	0.519	0.374	6.47663e-05	5	Hddc2
4.15084e-09	0.253276	0.516	0.37	7.15563e-05	5	Dkc1
4.89007e-09	0.269679	0.76	0.611	8.42998e-05	5	Lmo4
5.15499e-09	0.256133	0.676	0.552	8.88669e-05	5	Pole3
5.33467e-09	0.275672	0.683	0.553	9.19644e-05	5	Uqcrc2
5.61451e-09	0.374537	0.638	0.492	9.67885e-05	5	Nfkbia
6.76398e-09	0.302481	0.679	0.561	0.000116604	5	Magoh
6.93908e-09	0.272671	0.596	0.441	0.000119623	5	Tsc22d4
7.27442e-09	0.26811	0.91	0.872	0.000125404	5	Arf1
7.73571e-09	0.261412	0.811	0.704	0.000133356	5	Pfdn2
8.05584e-09	0.271435	0.705	0.559	0.000138875	5	Apex1
8.49743e-09	0.34621	0.808	0.666	0.000146487	5	Id1
1.34417e-08	0.274323	0.564	0.421	0.000231721	5	Rangap1
1.65231e-08	0.299348	0.696	0.591	0.000284842	5	Ccnl1
1.79117e-08	0.343577	0.853	0.788	0.00030878	5	Sox11
2.31019e-08	0.302207	0.856	0.787	0.000398254	5	Zfp36l1
3.02683e-08	0.32252	0.692	0.612	0.000521794	5	Bzw2
5.16759e-08	0.279477	0.474	0.344	0.000890841	5	Cmas
6.59058e-08	0.402259	0.965	0.934	0.00113615	5	Ccnd2
7.41262e-08	0.330251	0.66	0.548	0.00127786	5	Igfbp2
1.3405e-07	0.331436	0.929	0.908	0.00231089	5	Siva1
2.11655e-07	0.253766	0.763	0.685	0.00364872	5	Cct3
2.26317e-07	0.288662	0.625	0.509	0.00390148	5	Myl12b
3.54028e-07	0.259477	0.654	0.546	0.00610309	5	Ak2
9.43829e-07	0.301193	0.657	0.53	0.0162707	5	Dnajb1
2.02157e-06	0.273672	0.849	0.781	0.0348499	5	Ier2
2.43254e-06	0.285604	0.638	0.523	0.0419346	5	Phgdh
7.6918e-06	0.272032	0.314	0.211	0.132599	5	Dusp6
3.17119e-05	0.267735	0.821	0.757	0.546681	5	Prdx5
6.79759e-05	0.369457	0.673	0.62	1	5	Ahnak
9.8111e-05	0.276502	0.705	0.598	1	5	Junb
0.000108538	0.355134	0.532	0.44	1	5	Sostdc1
0.000344117	0.290267	0.356	0.283	1	5	Glul
0.00807138	0.278305	0.599	0.559	1	5	Btg2
2.04644e-177	1.12173	0.64	0.077	3.52785e-173	6	Casz1
5.38126e-159	1.63647	0.741	0.13	9.27675e-155	6	Nrgn
1.12941e-136	3.02929	1	0.817	1.94699e-132	6	Crabp1
1.05543e-133	1.32135	0.816	0.19	1.81946e-129	6	Lix1
1.97443e-127	1.81992	0.991	0.499	3.40372e-123	6	Twist2
8.75722e-111	0.631153	0.404	0.045	1.50966e-106	6	Nrn1
2.67603e-109	0.665601	0.461	0.06	4.61322e-105	6	Sp5
5.61218e-106	1.88568	0.991	0.694	9.67483e-102	6	Crip1
6.57316e-91	1.34726	0.974	0.492	1.13315e-86	6	Nrp1
7.87679e-89	0.977981	1	1	1.35788e-84	6	Lgals1
3.31251e-86	0.871965	0.557	0.119	5.71044e-82	6	Rspo1
3.3434e-79	1.17462	0.908	0.415	5.76369e-75	6	Pth1r
7.56376e-79	0.778365	0.566	0.132	1.30392e-74	6	Irx1
1.07708e-76	0.831636	0.689	0.199	1.85678e-72	6	C1qtnf2
3.22137e-75	1.14837	0.794	0.31	5.55333e-71	6	Nkd1
5.42514e-70	0.857505	0.649	0.194	9.3524e-66	6	Vcam1
3.14931e-62	0.469686	0.377	0.069	5.4291e-58	6	Runx3
2.07484e-61	0.825302	0.667	0.224	3.57682e-57	6	Irx3
2.47986e-61	0.898153	0.991	0.812	4.27504e-57	6	Tcf4
3.21307e-56	0.788789	0.553	0.164	5.53901e-52	6	a
8.79397e-56	0.516075	0.325	0.058	1.51599e-51	6	Hoxc5
2.38333e-51	0.995647	0.925	0.539	4.10862e-47	6	Lum
1.28111e-49	0.350241	0.285	0.049	2.20851e-45	6	Apela
1.28819e-47	0.39689	0.333	0.069	2.22072e-43	6	Ass1
7.88722e-47	0.79898	0.952	0.809	1.35968e-42	6	Svbp
3.8838e-45	0.792292	0.939	0.679	6.69529e-41	6	Emp3
8.50594e-44	0.675581	0.61	0.23	1.46634e-39	6	Tmem132c
2.49969e-43	0.567254	0.518	0.168	4.30922e-39	6	Arl4c
2.26031e-42	0.479414	0.36	0.087	3.89655e-38	6	Rpl39l
8.21331e-42	0.378531	0.329	0.074	1.41589e-37	6	Hoxd8
3.76492e-41	0.696197	0.711	0.311	6.49034e-37	6	Shox2
3.91479e-41	0.634349	0.649	0.288	6.7487e-37	6	Pten
1.4984e-40	0.387857	0.329	0.076	2.58309e-36	6	Hoxb2
1.30965e-39	0.678709	0.987	0.93	2.2577e-35	6	Cd63
7.40118e-39	0.593629	1	0.989	1.27589e-34	6	Wbp5
1.32609e-38	0.589113	0.614	0.253	2.28604e-34	6	Ddah1
1.28789e-36	0.868013	0.803	0.529	2.2202e-32	6	Fbln1
4.4762e-36	0.326936	0.259	0.054	7.71653e-32	6	Plxna4
2.67299e-34	0.507564	0.526	0.204	4.60797e-30	6	Fez1
5.0668e-34	0.666561	0.93	0.707	8.73466e-30	6	Eva1b
7.63798e-34	0.605513	0.768	0.394	1.31671e-29	6	Bcl11b
1.74795e-33	0.657986	0.904	0.594	3.0133e-29	6	Gm13305
5.46437e-33	0.559977	0.991	0.954	9.42003e-29	6	Serpinh1
1.92003e-32	0.668204	1	0.858	3.30994e-28	6	Col3a1
2.41074e-32	0.581967	0.925	0.632	4.15588e-28	6	Dcn
7.26442e-32	0.314974	0.268	0.063	1.25231e-27	6	Abca8a
2.12202e-30	0.617801	0.996	0.973	3.65814e-26	6	Eif2s2
2.96332e-29	0.486547	0.482	0.189	5.10847e-25	6	Cntfr
3.93765e-29	0.485868	0.487	0.194	6.78811e-25	6	Axin2
9.42383e-29	0.338614	0.342	0.104	1.62457e-24	6	Tbx15
9.50964e-29	0.733514	0.899	0.728	1.63937e-24	6	Prdx6
1.05178e-28	0.567783	1	0.99	1.81316e-24	6	Stmn1
1.5136e-28	0.309978	0.307	0.087	2.6093e-24	6	Col7a1
1.87637e-28	0.637522	0.886	0.728	3.23468e-24	6	Eif1b
2.38332e-28	0.547866	0.627	0.317	4.10861e-24	6	Lhfp
3.73459e-28	0.439455	0.408	0.146	6.43806e-24	6	Fam174b
1.22374e-27	0.572423	0.64	0.34	2.10961e-23	6	Smad1
2.1522e-27	0.474546	0.482	0.194	3.71018e-23	6	Tmem100
7.31527e-27	0.591958	0.618	0.314	1.26108e-22	6	Arhgdib
9.33182e-27	0.497988	0.491	0.204	1.60871e-22	6	Kcnk2
1.34641e-25	0.56219	0.921	0.796	2.32107e-21	6	Limd2
2.01844e-25	0.422878	1	0.986	3.47959e-21	6	Ifitm2
3.2585e-25	0.488734	1	0.979	5.61734e-21	6	Ngfrap1
5.21302e-25	0.462625	1	0.999	8.98672e-21	6	Hmgb1
5.91252e-25	0.626458	0.811	0.542	1.01926e-20	6	Map1b
9.43822e-25	0.348071	0.351	0.118	1.62705e-20	6	Inhba
1.24433e-24	0.50707	0.969	0.869	2.14509e-20	6	Cd81
1.39396e-24	0.40021	0.39	0.146	2.40305e-20	6	Cpne5
2.4974e-24	0.588387	0.798	0.557	4.30527e-20	6	2022-09-11
3.00204e-24	0.345872	1	1	5.17521e-20	6	Tmsb10
3.83405e-24	0.550912	0.654	0.365	6.60951e-20	6	Dpysl3
5.68015e-24	0.29282	0.263	0.076	9.792e-20	6	Thsd7a
7.7501e-24	0.570426	0.772	0.487	1.33604e-19	6	Col6a1
6.04787e-23	0.54326	0.531	0.253	1.04259e-18	6	Penk
9.84367e-23	0.698613	0.987	0.907	1.69695e-18	6	Hmgb2
1.24854e-22	0.545764	0.789	0.529	2.15235e-18	6	Col6a2
1.95088e-22	0.377298	0.412	0.166	3.36313e-18	6	5930412G12Rik
4.43487e-22	0.402029	0.452	0.196	7.64526e-18	6	St8sia2
9.30741e-22	0.754456	0.592	0.342	1.60451e-17	6	Gadd45g
9.55916e-22	0.300129	0.289	0.095	1.6479e-17	6	Hist1h3c
1.36214e-21	0.282259	0.254	0.076	2.3482e-17	6	Pde7b
3.25357e-21	0.275386	0.303	0.102	5.60883e-17	6	Slitrk6
9.14122e-21	0.370681	0.307	0.109	1.57585e-16	6	Gadd45a
1.02645e-20	0.470021	0.803	0.547	1.7695e-16	6	Ccnd1
6.01661e-20	0.680091	0.925	0.833	1.0372e-15	6	2810417H13Rik
7.85042e-20	0.466542	0.632	0.353	1.35333e-15	6	Sema5a
9.78865e-20	0.485019	0.803	0.518	1.68746e-15	6	Zeb2
4.00545e-19	0.444528	0.978	0.931	6.90499e-15	6	Cnbp
6.24171e-19	0.444241	0.978	0.898	1.07601e-14	6	Tuba1a
7.43618e-19	0.310542	1	1	1.28192e-14	6	Cox6c
9.54562e-19	0.440644	0.61	0.353	1.64557e-14	6	Pcdh18
1.29037e-18	0.468252	0.864	0.644	2.22448e-14	6	Hmga2
1.45933e-18	0.438873	0.969	0.87	2.51574e-14	6	Peg3
1.61472e-18	0.341943	1	0.994	2.78361e-14	6	Rbm3
2.65238e-18	0.429592	0.741	0.465	4.57244e-14	6	Col6a3
2.84662e-18	0.366022	0.434	0.202	4.90729e-14	6	Irx5
5.61133e-18	0.33388	0.421	0.195	9.67337e-14	6	Ncoa1
8.12634e-18	0.37394	0.64	0.364	1.4009e-13	6	Il11ra1
9.79238e-18	0.296168	0.294	0.111	1.68811e-13	6	Thsd4
1.17818e-17	0.334077	0.368	0.159	2.03107e-13	6	Igsf10
3.48399e-17	0.430354	0.684	0.46	6.00605e-13	6	Smco4
3.62994e-17	0.310747	0.991	0.954	6.25765e-13	6	Sparc
8.1335e-17	0.308972	0.303	0.121	1.40213e-12	6	Cblb
1.38062e-16	0.42737	0.741	0.477	2.38005e-12	6	Cdh11
1.63155e-16	0.516317	0.518	0.294	2.81263e-12	6	Tril
2.13141e-16	0.345246	0.465	0.228	3.67433e-12	6	Rspo3
2.20921e-16	0.299845	0.346	0.148	3.80846e-12	6	Emp2
2.49065e-16	0.390026	0.539	0.306	4.29364e-12	6	Fam212a
2.75984e-16	0.424969	0.728	0.485	4.75769e-12	6	Fxyd6
3.61117e-16	0.427707	0.702	0.47	6.22529e-12	6	Myh10
3.70964e-16	0.406026	0.886	0.634	6.39505e-12	6	Celf2
7.44634e-16	0.414035	0.899	0.754	1.28367e-11	6	Auts2
9.32736e-16	0.482868	0.75	0.528	1.60794e-11	6	Rhob
9.66837e-16	0.291666	0.377	0.172	1.66673e-11	6	Ednra
1.21314e-15	0.749828	0.829	0.677	2.09133e-11	6	Cks2
1.23836e-15	0.274784	0.452	0.217	2.13482e-11	6	Col14a1
1.5205e-15	0.43433	0.974	0.946	2.6212e-11	6	Raly
2.62004e-15	0.357518	0.991	0.857	4.51668e-11	6	Mfap2
3.16251e-15	0.441871	0.803	0.617	5.45186e-11	6	Tcf12
5.54001e-15	0.392723	0.452	0.236	9.55043e-11	6	Twist1
8.12708e-15	0.471757	0.68	0.483	1.40103e-10	6	Bcl11a
8.26763e-15	0.500842	0.579	0.368	1.42526e-10	6	Ccna2
1.67879e-14	0.633494	0.789	0.664	2.89406e-10	6	Birc5
2.31792e-14	0.293125	1	0.992	3.99586e-10	6	Morf4l1
3.07227e-14	0.515818	0.697	0.542	5.29629e-10	6	Hjurp
3.71976e-14	0.255815	0.289	0.12	6.41249e-10	6	Irx2
4.98474e-14	0.402526	1	0.988	8.59319e-10	6	Tuba1b
6.21232e-14	0.54799	0.816	0.668	1.07094e-09	6	Id1
9.48257e-14	0.504424	0.662	0.454	1.6347e-09	6	Ly6h
9.83724e-14	0.348073	0.965	0.888	1.69584e-09	6	Tpm4
1.43344e-13	0.406229	0.741	0.52	2.47111e-09	6	Syce2
1.71669e-13	0.33126	0.588	0.356	2.9594e-09	6	Pdgfra
2.30846e-13	0.311525	0.425	0.222	3.97956e-09	6	Tnfrsf19
2.62976e-13	0.257818	0.447	0.23	4.53344e-09	6	Cd34
2.75404e-13	0.266876	0.32	0.144	4.74769e-09	6	Sgol2a
3.02852e-13	0.304057	0.996	0.929	5.22086e-09	6	Vim
3.38145e-13	0.357763	0.518	0.307	5.82927e-09	6	Ptk7
3.41068e-13	0.37651	0.298	0.135	5.87967e-09	6	Thy1
1.14687e-12	0.488926	0.658	0.46	1.97709e-08	6	S100a6
1.18727e-12	0.361873	0.575	0.365	2.04673e-08	6	Gng12
1.30648e-12	0.325068	0.447	0.249	2.25225e-08	6	Nrtn
1.35642e-12	0.31455	0.518	0.302	2.33833e-08	6	Snai2
1.39329e-12	0.353108	0.921	0.826	2.4019e-08	6	Ppp1cc
1.90585e-12	0.28284	0.338	0.162	3.2855e-08	6	Plxdc2
2.11976e-12	0.408724	0.838	0.69	3.65425e-08	6	Reep5
2.4111e-12	0.361818	0.886	0.783	4.1565e-08	6	2022-09-07
2.62882e-12	0.337858	0.509	0.303	4.53183e-08	6	Kdelr3
5.05306e-12	0.290307	0.368	0.187	8.71097e-08	6	Col23a1
6.60964e-12	1.09471	0.75	0.672	1.13944e-07	6	Hist1h2ap
7.04284e-12	0.271978	0.298	0.14	1.21412e-07	6	Fam107b
7.23918e-12	0.366193	0.746	0.547	1.24796e-07	6	Nbl1
8.54723e-12	0.348669	0.825	0.615	1.47346e-07	6	Fbn2
8.75563e-12	0.439336	0.395	0.211	1.50938e-07	6	Bmp4
1.02784e-11	0.368889	0.851	0.683	1.77189e-07	6	Fscn1
1.63341e-11	0.332269	0.57	0.371	2.81584e-07	6	Eln
2.21778e-11	0.287757	1	0.984	3.82324e-07	6	Ranbp1
2.22499e-11	0.383616	0.759	0.59	3.83566e-07	6	Spats2l
2.95541e-11	0.439748	0.539	0.351	5.09483e-07	6	Mki67
3.22097e-11	0.343122	0.947	0.902	5.55264e-07	6	Dek
3.70509e-11	0.417313	0.741	0.555	6.3872e-07	6	Lig1
3.7529e-11	0.504546	0.842	0.768	6.46962e-07	6	H1f0
4.13884e-11	0.287098	0.978	0.934	7.13494e-07	6	Sfr1
5.2485e-11	0.507136	0.746	0.573	9.04789e-07	6	Top2a
6.06628e-11	0.295413	0.531	0.327	1.04577e-06	6	Rhoj
8.49311e-11	0.250145	1	0.99	1.46413e-06	6	Mrfap1
9.63455e-11	0.446619	0.785	0.652	1.6609e-06	6	Slbp
2.23438e-10	0.259454	0.338	0.173	3.85184e-06	6	Ngfr
2.35638e-10	0.29735	0.592	0.378	4.06216e-06	6	Wnt5a
2.42539e-10	0.469624	0.443	0.275	4.18114e-06	6	Hist1h1b
2.52698e-10	0.296942	0.592	0.387	4.35627e-06	6	Nr4a1
2.73864e-10	0.273408	0.496	0.301	4.72114e-06	6	Hic1
2.7474e-10	0.318922	0.961	0.894	4.73625e-06	6	Nucks1
3.58389e-10	0.281585	0.904	0.781	6.17826e-06	6	Ywhah
4.944e-10	0.256184	0.961	0.905	8.52297e-06	6	Arf4
5.48573e-10	0.323435	0.596	0.412	9.45685e-06	6	Adgrl2
7.21947e-10	0.323893	0.961	0.891	1.24456e-05	6	Laptm4a
7.23545e-10	0.298424	0.373	0.208	1.24732e-05	6	Mxd3
7.30043e-10	0.293508	0.395	0.228	1.25852e-05	6	Rad51ap1
8.15282e-10	0.260626	0.294	0.149	1.40546e-05	6	Cenpl
8.23991e-10	0.357115	0.623	0.442	1.42048e-05	6	Emp1
8.84292e-10	0.328244	0.689	0.526	1.52443e-05	6	Gas1
1.05304e-09	0.321205	0.785	0.627	1.81533e-05	6	Eif4ebp1
1.13338e-09	0.285716	0.974	0.939	1.95384e-05	6	Txn1
1.49374e-09	0.288914	0.61	0.42	2.57506e-05	6	Gmnn
2.59883e-09	0.34522	0.741	0.583	4.48012e-05	6	Smc2
2.74049e-09	0.285302	0.395	0.235	4.72434e-05	6	Acap2
2.85798e-09	0.377602	0.754	0.612	4.92687e-05	6	Snhg18
3.22527e-09	0.319282	0.772	0.656	5.56004e-05	6	Smc3
3.55307e-09	0.358169	0.596	0.442	6.12513e-05	6	Tyms
3.85518e-09	0.265267	0.93	0.848	6.64594e-05	6	Cdc26
3.99204e-09	0.311957	0.965	0.869	6.88187e-05	6	Id3
4.78348e-09	0.28924	0.649	0.473	8.24625e-05	6	Ccdc88a
4.94439e-09	0.261088	0.522	0.34	8.52363e-05	6	Ddr2
5.34703e-09	0.251455	1	1	9.21774e-05	6	Dynll1
5.69008e-09	0.269562	0.842	0.666	9.80912e-05	6	Bgn
6.54043e-09	0.309289	0.68	0.499	0.00011275	6	Clmp
6.60111e-09	0.346374	0.86	0.737	0.000113796	6	Hmgb3
7.13626e-09	0.288741	0.947	0.921	0.000123022	6	Hsbp1
7.48606e-09	0.272717	0.961	0.908	0.000129052	6	Myl12a
8.23143e-09	0.300147	0.838	0.749	0.000141902	6	Hsd17b10
9.01641e-09	0.312259	0.711	0.531	0.000155434	6	Csrp1
1.21872e-08	0.327267	0.57	0.408	0.000210095	6	Peli1
1.96106e-08	0.370279	0.618	0.482	0.000338068	6	Cenpw
2.28579e-08	0.27604	0.873	0.827	0.000394047	6	2022-09-15
2.56386e-08	0.292448	0.491	0.33	0.000441983	6	Pik3r1
2.60034e-08	0.25068	0.899	0.796	0.000448273	6	Eid1
2.66883e-08	0.311809	0.697	0.563	0.000460079	6	Ivns1abp
2.75637e-08	0.266759	0.544	0.383	0.000475171	6	Rnf26
2.93348e-08	0.295866	0.702	0.54	0.000505702	6	Eci2
3.49549e-08	0.303432	0.969	0.925	0.000602588	6	Cks1b
4.9296e-08	0.393244	0.68	0.545	0.000849815	6	Smc4
5.62975e-08	0.253561	0.421	0.271	0.000970513	6	Dbf4
5.97239e-08	0.404881	0.496	0.343	0.00102958	6	Hist1h2ae
8.74447e-08	0.268836	0.934	0.833	0.00150746	6	Srsf7
9.65733e-08	0.388839	0.553	0.401	0.00166483	6	Spc25
9.745e-08	0.291487	0.417	0.27	0.00167994	6	Aebp1
1.47837e-07	0.27369	0.504	0.353	0.00254856	6	Tln2
1.89653e-07	0.286561	0.553	0.393	0.00326942	6	Phldb2
2.09868e-07	0.273622	0.798	0.66	0.00361791	6	Tead2
2.16616e-07	0.268222	0.649	0.485	0.00373424	6	Lpar1
2.21426e-07	0.306709	0.579	0.457	0.00381717	6	Bbip1
2.29217e-07	0.271978	0.649	0.499	0.00395147	6	Hes1
2.47432e-07	0.384759	0.469	0.332	0.00426548	6	Prc1
2.48816e-07	0.319708	0.412	0.269	0.00428934	6	Fam64a
2.53122e-07	0.250954	0.276	0.155	0.00436357	6	Hist1h4d
2.71276e-07	0.37821	0.803	0.711	0.00467652	6	H2afx
2.90578e-07	0.278556	0.693	0.543	0.00500927	6	Dnajc9
3.14193e-07	0.261845	0.846	0.716	0.00541638	6	Ap3s1
4.72759e-07	0.467773	0.478	0.344	0.00814989	6	Nusap1
5.09354e-07	0.50744	0.43	0.314	0.00878075	6	Hist1h1e
6.04408e-07	0.25333	0.36	0.227	0.0104194	6	Fbxo5
9.67748e-07	0.303525	0.5	0.374	0.016683	6	Apitd1
9.67833e-07	0.295906	0.996	0.975	0.0166845	6	Ube2s
9.76422e-07	0.290814	0.825	0.681	0.0168325	6	Cyr61
1.36596e-06	0.282055	0.772	0.653	0.0235477	6	Tipin
1.65368e-06	0.26997	0.969	0.973	0.0285078	6	Calm2
1.71e-06	0.255275	0.618	0.474	0.0294786	6	Rsrc1
2.2736e-06	0.253026	0.662	0.507	0.0391946	6	Cdc42ep5
2.34974e-06	0.3775	0.579	0.461	0.0405072	6	Cdca8
2.62891e-06	0.285615	0.816	0.775	0.0453199	6	Psip1
2.97344e-06	0.250973	0.798	0.706	0.0512592	6	Pafah1b3
3.68124e-06	0.28132	0.548	0.405	0.0634609	6	Lockd
8.63156e-06	0.289312	0.618	0.505	0.148799	6	Efna5
9.63613e-06	0.268215	0.535	0.42	0.166117	6	Igf2bp2
1.27087e-05	0.537606	0.535	0.423	0.219086	6	Cenpf
1.6039e-05	0.260618	0.32	0.208	0.276497	6	Hmmr
1.73197e-05	0.2864	0.596	0.491	0.298575	6	Efemp2
1.85698e-05	0.281146	0.675	0.595	0.320124	6	Bub3
2.41809e-05	0.53854	0.68	0.613	0.416854	6	Ube2c
6.59715e-05	0.259049	0.439	0.331	1	6	Nr3c1
7.57283e-05	0.270301	0.614	0.534	1	6	Dnajc15
0.000227419	0.323835	0.386	0.288	1	6	Cdc20
0.00385709	0.421455	0.61	0.547	1	6	Cenpa
0.00404416	0.276746	0.518	0.468	1	6	Cdca3
0	1.31338	0.667	0.025	0	7	Gpx2
1.08496e-306	0.49516	0.364	0.004	1.87035e-302	7	Gm14133
9.93743e-306	0.538302	0.379	0.005	1.71311e-301	7	Krt23
6.43399e-295	1.63075	0.826	0.064	1.10915e-290	7	Krt8
1.23359e-287	1.33185	0.867	0.074	2.12659e-283	7	Mia
2.32183e-253	0.627769	0.446	0.015	4.0026e-249	7	Dact2
3.81837e-231	0.732762	0.379	0.011	6.58249e-227	7	Aldh1a7
3.61541e-229	1.1626	0.585	0.039	6.2326e-225	7	Sema3b
6.54252e-213	0.616965	0.482	0.025	1.12787e-208	7	Gyltl1b
2.77092e-208	1.07381	0.667	0.061	4.77679e-204	7	Cpm
1.14263e-207	2.05147	0.979	0.182	1.96979e-203	7	Epcam
4.05227e-202	1.12434	0.61	0.051	6.98571e-198	7	Tinagl1
5.40331e-201	0.411963	0.282	0.006	9.31476e-197	7	Foxa1
1.80937e-189	0.397289	0.256	0.005	3.11917e-185	7	Ceacam10
1.91638e-186	1.72542	0.867	0.142	3.30365e-182	7	Barx2
4.50694e-184	0.60326	0.513	0.036	7.76951e-180	7	Slc15a2
3.3787e-177	0.719951	0.579	0.05	5.82455e-173	7	Sox10
7.97416e-173	0.398005	0.277	0.008	1.37467e-168	7	Gm43194
2.00771e-159	0.859705	0.723	0.095	3.46109e-155	7	Col9a3
5.07697e-158	0.677031	0.574	0.057	8.75219e-154	7	Foxc1
1.09434e-157	0.549471	0.333	0.015	1.88653e-153	7	Ehf
8.55294e-154	0.49167	0.338	0.017	1.47444e-149	7	Sel1l3
1.05099e-153	1.75927	0.708	0.099	1.81181e-149	7	Krt18
8.08291e-139	0.385868	0.272	0.011	1.39341e-134	7	Kcnn4
2.18453e-138	0.504431	0.405	0.03	3.7659e-134	7	Car8
5.644e-136	0.569731	0.349	0.022	9.72969e-132	7	Cldn3
8.78627e-136	0.454939	0.333	0.019	1.51467e-131	7	Tmem30b
6.57366e-124	0.420569	0.308	0.018	1.13323e-119	7	Espn
1.19069e-123	0.933967	0.708	0.122	2.05262e-119	7	Ezr
1.22034e-121	0.7109	0.374	0.03	2.10374e-117	7	2610528A11Rik
5.35148e-120	0.734393	0.569	0.076	9.22541e-116	7	Pax9
1.33133e-119	1.1173	0.913	0.226	2.29509e-115	7	Spint2
1.81807e-117	0.504898	0.344	0.026	3.13417e-113	7	Aldoc
3.22676e-116	0.481575	0.385	0.033	5.5626e-112	7	Cdcp1
4.22848e-116	0.556714	0.462	0.05	7.28948e-112	7	St6gal1
3.29075e-114	0.364452	0.277	0.016	5.67293e-110	7	Tmem266
6.70996e-113	0.959788	0.769	0.166	1.15673e-108	7	Acot1
2.79094e-111	0.817397	0.672	0.123	4.81129e-107	7	Tmem238
1.96949e-110	0.543748	0.354	0.03	3.3952e-106	7	Fbxo32
3.64554e-107	0.785888	0.395	0.04	6.28454e-103	7	Cldn7
5.86748e-107	1.79809	0.964	0.415	1.01149e-102	7	Sfrp1
5.85391e-105	0.601876	0.497	0.064	1.00916e-100	7	Rab25
3.124e-104	0.36499	0.303	0.022	5.38546e-100	7	0610040J01Rik
3.25019e-104	0.717571	0.6	0.098	5.60301e-100	7	Col9a1
1.70463e-103	0.610526	0.61	0.099	2.93861e-99	7	F11r
8.06615e-103	1.85196	1	0.775	1.39052e-98	7	Cd24a
6.4615e-99	0.479822	0.405	0.045	1.1139e-94	7	Tmem54
9.70315e-99	1.01395	0.738	0.165	1.67273e-94	7	Fxyd3
1.13893e-96	0.901216	0.651	0.135	1.96341e-92	7	Etv5
6.66368e-96	0.686351	0.574	0.098	1.14875e-91	7	Lsr
1.59062e-95	0.98394	0.8	0.217	2.74208e-91	7	Tpd52
6.44811e-93	0.428097	0.308	0.026	1.11159e-88	7	Cited4
4.34973e-91	0.526079	0.421	0.053	7.49849e-87	7	Kctd14
1.01831e-89	0.339462	0.251	0.017	1.75546e-85	7	Elf3
2.17851e-87	0.910044	0.677	0.15	3.75553e-83	7	Shisa2
1.37533e-83	0.684599	0.415	0.056	2.37093e-79	7	Cldn6
1.39256e-83	0.623406	0.492	0.081	2.40064e-79	7	Etv4
7.07945e-82	0.962556	0.672	0.165	1.22043e-77	7	Wfdc2
9.82452e-82	0.647482	1	1	1.69365e-77	7	Rplp1
1.15886e-81	0.882913	0.728	0.187	1.99776e-77	7	Sox9
2.37251e-81	0.550814	0.492	0.082	4.08997e-77	7	Kcnk1
3.75688e-81	0.824432	0.667	0.162	6.47649e-77	7	Emid1
1.07803e-80	1.02503	0.79	0.244	1.85842e-76	7	Crlf1
1.12345e-77	0.435885	0.349	0.042	1.93672e-73	7	Apobec3
4.75188e-77	0.747243	0.877	0.283	8.19176e-73	7	Perp
5.29521e-77	0.643571	0.585	0.122	9.12841e-73	7	Fermt1
4.28534e-76	0.477311	0.421	0.063	7.3875e-72	7	Tmem59l
1.17871e-75	1.02742	0.81	0.276	2.03199e-71	7	Mgst1
3.14314e-74	1.86063	0.908	0.519	5.41846e-70	7	Ifitm3
2.67049e-73	0.741905	0.646	0.163	4.60366e-69	7	Fryl
3.56433e-73	1.05174	1	0.999	6.14455e-69	7	Gapdh
2.89849e-70	1.10944	0.974	0.752	4.9967e-66	7	Fkbp4
5.40801e-70	0.894444	0.692	0.185	9.32288e-66	7	Tfap2b
7.19715e-70	0.324732	0.267	0.027	1.24072e-65	7	St14
1.52841e-69	1.14541	1	0.927	2.63483e-65	7	Pkm
5.00117e-68	0.307384	0.262	0.027	8.62152e-64	7	Bcar3
1.16938e-67	1.02457	0.892	0.397	2.01589e-63	7	Bex4
4.0714e-67	1.20046	0.903	0.51	7.01868e-63	7	Tmem176b
2.942e-66	0.859313	0.728	0.239	5.07171e-62	7	Nrtn
2.62367e-64	0.493838	0.426	0.076	4.52295e-60	7	Acer2
8.61588e-64	0.450065	0.4	0.068	1.48529e-59	7	Gne
1.23475e-62	0.548266	1	1	2.12859e-58	7	Rps2
2.63959e-61	1.3099	0.954	0.843	4.55039e-57	7	Hspd1
2.74628e-61	0.812645	0.662	0.2	4.73431e-57	7	Dusp6
6.81127e-61	0.649214	1	1	1.17419e-56	7	Hsp90ab1
9.20507e-61	1.23332	0.985	0.776	1.58686e-56	7	Eno1
1.31505e-60	1.244	0.979	0.927	2.26702e-56	7	Ldha
3.94546e-60	0.435602	0.395	0.069	6.80157e-56	7	Cdh1
8.68408e-60	0.746431	1	1	1.49705e-55	7	Npm1
3.78392e-59	0.395061	0.385	0.066	6.5231e-55	7	Mpzl2
1.41577e-58	0.774134	0.697	0.228	2.44065e-54	7	Tmem176a
1.45531e-58	0.794593	1	0.999	2.50881e-54	7	Mif
4.68676e-58	0.66397	0.646	0.192	8.07951e-54	7	Rcl1
2.5931e-57	0.987425	0.903	0.515	4.47025e-53	7	Phgdh
3.94966e-57	0.480814	0.462	0.096	6.80883e-53	7	Car12
5.60049e-57	0.875419	1	0.987	9.65468e-53	7	Set
5.49594e-56	1.04441	1	0.979	9.47444e-52	7	Ncl
6.64468e-56	0.396523	0.379	0.068	1.14548e-51	7	Kdf1
7.34519e-56	1.09097	0.979	0.878	1.26624e-51	7	Slc25a5
1.65487e-55	0.87591	0.81	0.36	2.85283e-51	7	Psat1
1.91562e-55	0.931158	1	0.981	3.30234e-51	7	Calm1
2.72975e-55	1.47518	0.985	0.934	4.70582e-51	7	Ccnd2
3.13007e-55	1.00127	0.913	0.515	5.39593e-51	7	Foxp1
1.24458e-54	0.580385	0.523	0.133	2.14553e-50	7	Plpp2
1.77214e-54	0.730547	1	1	3.05499e-50	7	Actg1
1.84406e-54	1.02087	0.877	0.425	3.17898e-50	7	Mt1
1.60714e-53	0.541938	1	1	2.77056e-49	7	Ptma
1.87543e-53	1.08152	0.928	0.657	3.23305e-49	7	Pa2g4
1.02184e-52	0.943842	0.728	0.291	1.76156e-48	7	Sdc4
1.02644e-52	0.537842	0.487	0.118	1.76947e-48	7	Itga9
1.48182e-52	0.686728	0.595	0.177	2.55451e-48	7	Emb
2.26882e-52	0.429045	0.41	0.083	3.91121e-48	7	Tfap2a
1.64711e-51	0.383647	0.61	0.181	2.83946e-47	7	Col2a1
2.44175e-51	0.651875	0.759	0.283	4.20933e-47	7	Cd9
5.76228e-51	0.453863	0.436	0.096	9.93359e-47	7	Irf6
1.24671e-50	0.942425	0.933	0.709	2.1492e-46	7	C1qbp
2.42868e-50	0.725685	1	0.959	4.1868e-46	7	Slc25a3
1.62015e-49	0.35514	0.446	0.099	2.79297e-45	7	Gm16136
1.51603e-48	0.635708	1	0.995	2.61349e-44	7	Gm10073
5.90485e-48	0.663814	1	0.997	1.01794e-43	7	Eif5a
8.4668e-48	0.398123	0.421	0.094	1.45959e-43	7	Hlf
1.06749e-46	0.735464	0.995	0.949	1.84024e-42	7	Psma7
3.66917e-46	0.639512	1	0.995	6.32527e-42	7	Serbp1
3.70864e-46	0.741198	1	0.989	6.39332e-42	7	Ran
4.24879e-46	0.497347	0.451	0.114	7.3245e-42	7	Gpd2
7.7941e-46	0.708916	1	0.984	1.34362e-41	7	Ranbp1
4.14413e-45	0.471263	0.456	0.112	7.14406e-41	7	Apoc1
5.02483e-45	0.363436	0.364	0.074	8.6623e-41	7	Esrp1
1.93557e-44	0.936031	0.841	0.411	3.33673e-40	7	Pdgfa
2.1806e-44	0.736379	0.985	0.958	3.75913e-40	7	Nme1
2.19359e-44	0.464483	0.431	0.107	3.78154e-40	7	Slc25a13
7.9635e-44	0.388842	0.374	0.082	1.37283e-39	7	Tst
1.80554e-43	0.645167	1	0.998	3.11256e-39	7	Hspe1
1.94212e-43	0.888908	0.928	0.685	3.34802e-39	7	Lyar
2.24516e-43	0.313941	0.308	0.056	3.87043e-39	7	Sorbs2
3.64644e-43	0.793788	1	0.972	6.2861e-39	7	Hsp90aa1
5.06654e-43	0.458712	0.41	0.1	8.7342e-39	7	Eps8
5.41505e-43	0.592523	0.595	0.206	9.335e-39	7	Clstn1
1.10682e-42	0.634902	0.662	0.255	1.90805e-38	7	Gcat
1.11342e-42	0.67638	0.995	0.877	1.91942e-38	7	Dstn
6.74316e-42	0.391925	0.421	0.103	1.16245e-37	7	Cpne8
1.74355e-41	0.643843	0.995	0.937	3.00571e-37	7	Ywhaq
2.01254e-41	0.303492	0.267	0.045	3.46942e-37	7	Lad1
4.76737e-41	0.293413	0.272	0.047	8.21846e-37	7	Lama5
6.04042e-41	0.352547	0.338	0.071	1.04131e-36	7	Hspb8
9.25209e-41	0.682504	0.99	0.953	1.59497e-36	7	Atp5b
9.7548e-41	0.347035	0.328	0.068	1.68163e-36	7	Sft2d2
1.10492e-40	0.463453	1	1	1.90478e-36	7	Ppia
1.17041e-40	0.349906	0.292	0.055	2.01768e-36	7	Cmtm8
1.42929e-40	0.791622	0.964	0.711	2.46396e-36	7	Rcn1
2.2136e-40	0.656805	0.641	0.23	3.81602e-36	7	Mt2
2.70444e-40	0.438632	1	1	4.66218e-36	7	Rpl7a
7.87888e-40	0.85129	0.903	0.609	1.35824e-35	7	Lmo4
1.38257e-39	0.908693	0.938	0.807	2.38341e-35	7	Hsp90b1
2.16851e-39	0.596024	0.626	0.24	3.73829e-35	7	Hmga1
6.07626e-39	0.73262	0.969	0.853	1.04749e-34	7	Anp32a
9.60666e-39	0.67525	1	1	1.65609e-34	7	Hspa8
1.275e-38	0.379682	0.369	0.089	2.19797e-34	7	Znrf2
2.36817e-38	0.678639	0.995	0.984	4.08249e-34	7	Anp32b
3.05999e-38	0.574344	1	0.991	5.27512e-34	7	Eif4a1
4.12443e-38	0.488187	0.595	0.211	7.1101e-34	7	1110004E09Rik
4.39665e-38	0.388807	0.374	0.092	7.57939e-34	7	Plcb4
8.19866e-38	0.357696	1	1	1.41337e-33	7	Rpl12
8.99502e-38	0.790821	0.867	0.493	1.55065e-33	7	Bex1
1.51491e-37	0.473569	0.508	0.159	2.61156e-33	7	Pon2
3.46235e-37	0.715312	0.938	0.663	5.96874e-33	7	Cacybp
3.49101e-37	0.454964	1	0.999	6.01815e-33	7	Sumo2
7.40088e-37	0.696995	0.933	0.704	1.27584e-32	7	Knop1
7.82864e-37	0.361073	0.359	0.087	1.34958e-32	7	Cgnl1
1.52208e-36	0.687496	0.964	0.818	2.62392e-32	7	Npm3
1.97303e-36	0.293914	0.287	0.057	3.4013e-32	7	Ntrk3
2.0064e-36	0.520136	0.503	0.164	3.45883e-32	7	Psph
3.19867e-36	0.354673	0.277	0.054	5.51419e-32	7	Cldn4
5.69623e-36	0.615654	0.641	0.272	9.81973e-32	7	Ifrd2
8.23221e-36	0.486395	0.518	0.171	1.41915e-31	7	Pdgfc
1.45924e-35	0.708481	0.779	0.425	2.51559e-31	7	Nolc1
1.69061e-35	0.412084	0.415	0.115	2.91444e-31	7	Hs3st1
2.79347e-35	0.473194	1	1	4.81566e-31	7	Rpl36al
2.80029e-35	0.394942	0.421	0.118	4.82742e-31	7	Myc
5.65823e-35	0.496197	0.518	0.178	9.75423e-31	7	Cpd
5.92367e-35	0.710506	0.821	0.489	1.02118e-30	7	Ppa1
1.4581e-34	0.298183	0.303	0.066	2.51362e-30	7	Cdh3
1.50299e-34	0.334945	0.262	0.051	2.59101e-30	7	Fgf9
2.51745e-34	0.713367	0.81	0.508	4.33983e-30	7	Tomm40
2.53483e-34	0.363657	0.379	0.1	4.36979e-30	7	Cxadr
2.61089e-34	0.820838	0.815	0.527	4.50091e-30	7	Odc1
2.82539e-34	0.310825	0.313	0.071	4.87068e-30	7	Slc7a5
4.70364e-34	0.343939	0.344	0.084	8.1086e-30	7	Tspan12
6.39554e-34	0.685028	0.964	0.822	1.10253e-29	7	Tomm22
1.11151e-33	0.685273	0.856	0.545	1.91613e-29	7	Hspa9
1.12244e-33	0.547477	0.99	0.978	1.93497e-29	7	Pabpc1
1.76154e-33	0.358716	0.359	0.093	3.03672e-29	7	Tom1l1
2.27135e-33	0.351172	0.415	0.115	3.91558e-29	7	4631405K08Rik
8.55842e-33	0.383504	0.369	0.1	1.47539e-28	7	Mthfd1
8.66652e-33	0.642697	0.749	0.397	1.49402e-28	7	Aplp2
1.76042e-32	0.696508	0.877	0.636	3.03479e-28	7	Nop58
2.18804e-32	0.330922	0.426	0.124	3.77196e-28	7	Ehd4
3.99238e-32	0.437974	0.503	0.175	6.88246e-28	7	Pla2g12a
4.55793e-32	0.274824	0.267	0.056	7.85742e-28	7	Hook1
5.20921e-32	0.290687	0.292	0.066	8.98015e-28	7	Rtn1
5.89187e-32	0.375519	0.333	0.086	1.0157e-27	7	Phyh
6.60752e-32	0.640379	0.964	0.799	1.13907e-27	7	Nhp2
1.48204e-31	0.712411	0.574	0.244	2.5549e-27	7	Pdpn
2.90446e-31	0.379798	0.41	0.123	5.007e-27	7	Dhrs3
2.94688e-31	0.411979	0.508	0.174	5.08013e-27	7	Mapk13
3.49009e-31	0.445042	0.456	0.151	6.01656e-27	7	Six1
4.44476e-31	0.46168	1	0.991	7.66232e-27	7	Pebp1
6.97149e-31	0.271196	0.277	0.06	1.20182e-26	7	Dapl1
1.62749e-30	0.618191	0.682	0.332	2.80563e-26	7	Rangrf
1.64139e-30	0.277219	0.287	0.066	2.82959e-26	7	Tfap2c
1.66569e-30	0.268227	0.267	0.058	2.87149e-26	7	Ppm1k
1.84674e-30	0.562503	0.867	0.522	3.1836e-26	7	Tubb4b
2.62851e-30	0.482284	0.621	0.264	4.53129e-26	7	Ctbp2
2.91297e-30	0.615817	0.779	0.442	5.02167e-26	7	Isyna1
3.1554e-30	0.428077	0.718	0.335	5.4396e-26	7	Lgals7
3.2227e-30	0.643126	0.933	0.69	5.55562e-26	7	Dut
4.52139e-30	0.662626	0.964	0.81	7.79443e-26	7	Prmt1
5.76432e-30	0.482515	0.533	0.207	9.93711e-26	7	Ppif
6.36519e-30	0.546645	0.846	0.469	1.0973e-25	7	Pitx1
6.6674e-30	0.518965	0.733	0.367	1.14939e-25	7	Eef1e1
8.15577e-30	0.575233	1	0.94	1.40597e-25	7	Tomm20
8.1976e-30	0.288266	0.297	0.072	1.41318e-25	7	Ccnjl
1.01444e-29	0.592425	0.774	0.436	1.7488e-25	7	Gtpbp4
1.21183e-29	0.488577	0.585	0.247	2.08908e-25	7	Pno1
1.27099e-29	0.360299	0.354	0.1	2.19106e-25	7	Fam195a
1.73828e-29	0.594502	0.759	0.405	2.99663e-25	7	Uchl3
1.86206e-29	0.548749	0.656	0.311	3.21001e-25	7	Fam60a
2.52444e-29	0.250327	1	1	4.35187e-25	7	Rps3
5.83914e-29	0.49344	0.636	0.273	1.00661e-24	7	Socs2
1.41655e-28	0.628789	0.923	0.672	2.44199e-24	7	Cct7
1.44026e-28	0.545587	0.564	0.233	2.48287e-24	7	Tspan13
1.67623e-28	0.498153	0.656	0.306	2.88965e-24	7	Med19
2.66608e-28	0.597365	0.785	0.452	4.59606e-24	7	Dnajc2
2.76278e-28	0.469019	1	0.981	4.76276e-24	7	Uqcr11
3.14831e-28	0.563347	0.626	0.3	5.42737e-24	7	Mybbp1a
3.15723e-28	0.456511	1	0.973	5.44274e-24	7	Atox1
5.28478e-28	0.318955	1	1	9.11042e-24	7	Rpl27
7.27804e-28	0.47949	0.538	0.22	1.25466e-23	7	Pfkl
9.1027e-28	0.297109	0.272	0.065	1.56921e-23	7	Hs3st3b1
1.50811e-27	0.592093	0.723	0.406	2.59982e-23	7	Stip1
1.67537e-27	0.257404	0.262	0.061	2.88817e-23	7	Celsr1
1.68431e-27	0.611692	0.918	0.76	2.90359e-23	7	Ssb
2.46012e-27	0.261203	1	1	4.241e-23	7	Rpl7
2.75526e-27	0.343164	0.415	0.137	4.7498e-23	7	Mboat2
2.85022e-27	0.549517	0.708	0.381	4.9135e-23	7	Cs
3.41086e-27	0.402847	0.528	0.203	5.87998e-23	7	Cadm1
3.43442e-27	0.615705	0.805	0.528	5.9206e-23	7	Csrp1
4.16699e-27	0.471976	0.605	0.268	7.18347e-23	7	Slc38a1
6.48457e-27	0.467969	0.59	0.263	1.11787e-22	7	Farsb
8.42234e-27	0.30999	0.374	0.113	1.45193e-22	7	Hey1
9.38497e-27	0.285301	0.277	0.069	1.61787e-22	7	2610035D17Rik
9.83056e-27	0.613087	0.831	0.558	1.69469e-22	7	Magoh
1.00178e-26	0.459254	0.99	0.936	1.72697e-22	7	Ddx5
1.52695e-26	0.590643	0.918	0.736	2.63232e-22	7	Mrpl12
1.54578e-26	0.463774	1	0.962	2.66478e-22	7	Hnrnpa3
1.67478e-26	0.261686	0.272	0.067	2.88715e-22	7	Stk26
1.93304e-26	0.546049	0.759	0.446	3.33236e-22	7	Got2
2.06997e-26	0.511799	0.697	0.377	3.56842e-22	7	Tcof1
2.74871e-26	0.519928	0.949	0.703	4.7385e-22	7	Cct2
4.53337e-26	0.563225	0.687	0.367	7.81507e-22	7	Dkc1
4.68405e-26	0.377537	0.456	0.166	8.07483e-22	7	Gmds
5.02457e-26	0.400858	0.477	0.181	8.66185e-22	7	Pigf
[truncated: 6,347 more rows]
